# Supplementary material for: Genome-Wide DNA Methylation and Transcriptome Integration Associates DNA Methylation Changes with Bovine Subclinical Mastitis Caused by Staphylococcus chromogenes
Source: Int J Mol Sci. 2023 Jun 20;24(12):10369. doi: 10.3390/ijms241210369 (PMC10299661; doi:10.3390/ijms241210369)
Supplement: Supplementary file 1 [file ijms-24-10369-s001.zip]

Archive with 15 entries (15 files):
- Figure S1 DMEG BP-GO treeplot..pdf
- TableS1 General whole genome DNA methylation sequence statistics per sample.xlsx
- TableS10 List of identified differentially methylated and expressed genes (DMEGs).xlsx
- TableS11 Functional enrichment for DMEGs.xlsx
- TableS12 Candidate discriminate signatures of SC mastitis selected by sPLS-DA and DIABLO.xlsx
- TableS13 Sample information and results of target bisulfite amplicon sequencing for two dMHBs discrim-inate signatures in a larger sample size.xlsx
- TableS14 Information of cows used for whole genome DNA methylation sequencing.xlsx
- TableS2 Comparisons of methylation levels of cytosine sites at dif-ferent genic structures and genomic regions betw.xlsx
- TableS3 List of differentially methylated cytosine sites in the context of CpG.csv
- TableS4 List of differentially methylated cytosine sites in the context of CHG and CHH.xlsx
- TableS5 The distribution of differentially methylated cytosine sites among chromosomes and genic structures.xlsx
- TableS6 List of differentially methylated regions identified based on CpG sites;.xlsx
- TableS7 The distribution of DMCs in genes and the functional enrichment for genes that harbored DMCs.xlsx
- TableS8 List of differentially methylated methylation haplotype blocks.csv
- TableS9 Functional enrichment for genes harboring dMHBs in their promoters, first exons andor first in-trons.xlsx
