# Supplementary material for: Genome-Wide DNA Methylation and Transcriptome Integration Associates DNA Methylation Changes with Bovine Subclinical Mastitis Caused by Staphylococcus chromogenes
Source: Int J Mol Sci. 2023 Jun 20;24(12):10369. doi: 10.3390/ijms241210369 (PMC10299661; doi:10.3390/ijms241210369)
Supplement: Supplementary file 1 [file ijms-24-10369-s001.zip › TableS1 General whole genome DNA methylation sequence statistics per sample.xlsx]

## Sheet: Sheet1
Table S1 General whole genome DNA methylation sequence statistics per sample
Sample Name	% mCpG	% mCHG	% mCHH	M C's	% Dups	M Unique	M Aligned	% Aligned	% GC	Ins. size	≥ 5X	≥ 10X	Median cov	Mean cov	M reads
ME39q2SC_R1_val_1	0.779	0.002	0.001	13701.8	0.064	350.184	374.128	0.711	0.25	202	0.964	0.955	31	31.2	526.2
MK2356q4SC_R1_val_1	0.735	0.002	0.002	13174.4	0.203	314.248	394.289	0.79	0.23	221	0.9629	0.953	29	29.3	499.1
PI6908q2SC_R1_val_1	0.759	0.002	0.001	11155.3	0.211	268.776	340.654	0.756	0.23	218	0.9617	0.9476	25	24.9	450.6
SR65q2SC_R1_val_1	0.745	0.002	0.002	10751	0.049	277.386	291.678	0.758	0.23	194	0.9626	0.9435	25	25.2	384.8
PI8CT_R1_val_1	0.72	0.002	0.001	10457.3	0.219	235.8	302	0.711	0.22	236	0.961	0.943	22	22.5	424.754
SR27CT_R1_val_1	0.724	0.002	0.002	13604.8	0.241	314.9	415.2	0.743	0.22	226	0.964	0.955	30	29.7	558.816
SR51CT_R1_val_1	0.704	0.002	0.002	13477.4	0.058	334.2	354.6	0.74	0.22	201	0.963	0.954	31	30.8	479.189
SR52CT_R1_val_1	0.728	0.002	0.002	12093.8	0.228	275.9	357.3	0.742	0.22	233	0.962	0.951	26	26.1	481.536
Average	0.73675	0.002	0.001625	12302	0.159125	296.424	353.731	0.743875	0.2275	216.375	0.96265	0.950262	27.375	27.4625	475.525
