# Supplementary material for: Genome-Wide DNA Methylation and Transcriptome Integration Associates DNA Methylation Changes with Bovine Subclinical Mastitis Caused by Staphylococcus chromogenes
Source: Int J Mol Sci. 2023 Jun 20;24(12):10369. doi: 10.3390/ijms241210369 (PMC10299661; doi:10.3390/ijms241210369)
Supplement: Supplementary file 1 [file ijms-24-10369-s001.zip › TableS2 Comparisons of methylation levels of cytosine sites at dif-ferent genic structures and genomic regions betw.xlsx]

## Sheet: CpGisland_global_methylation_co
Table S2 Comparisons of methylation levels of cytosine sites in the context of CpG, CHG and CHH at dif-ferent genic structures and genomic regions between SCP and HC groups
region	context	Mean methylation level of SC group	Mean methylation level of HC group	methylation level diffience between SC and HC (SC-HC)	p.value	CI0.95_1	CI0.95_2	p.adj
CGI shelf (L)	CpG	82.2191	77.9068	4.31228	0.00973621	1.70044	6.92412	0.022259
CGI shore (L)	CpG	68.9245	64.1914	4.73311	0.00556475	2.2216	7.24462	0.022259
CGI	CpG	24.67	22.9088	1.76126	0.00392139	0.812784	2.70974	0.0196069
CGI shore (R)	CpG	68.8912	64.2056	4.68559	0.00576623	2.1732	7.19798	0.022259
CGI shelf (R)	CpG	81.9622	77.5557	4.40643	0.00953292	1.7445	7.06837	0.022259
CGI shelf (L)	CHH	0.158299	0.159649	-0.0013499	0.939695	-0.0482687	0.0455689	1
CGI shore (L)	CHH	0.154854	0.15079	0.00406472	0.835298	-0.0484389	0.0565684	1
CGI	CHH	0.199535	0.163537	0.035998	0.295564	-0.0466076	0.118604	1
CGI shore (R)	CHH	0.154233	0.150915	0.00331767	0.855913	-0.0459669	0.0526023	1
CGI shelf (R)	CHH	0.158932	0.159387	-0.000454838	0.981145	-0.0512327	0.050323	1
CGI shelf (L)	CHG	0.17051	0.166898	0.00361233	0.837185	-0.042085	0.0493096	1
CGI shore (L)	CHG	0.172549	0.162275	0.0102741	0.592126	-0.0395593	0.0601076	1
CGI	CHG	0.265763	0.220136	0.045627	0.275724	-0.0508411	0.142095	1
CGI shore (R)	CHG	0.172617	0.163003	0.00961395	0.605276	-0.0390103	0.0582382	1
CGI shelf (R)	CHG	0.174425	0.169556	0.0048687	0.791691	-0.0424526	0.05219	1
promoter	CpG	36.8379	34.0781	2.75982	0.00422224	1.35377	4.16588	0.0253334
first exon	CpG	14.2501	13.0511	1.19907	0.004309	0.549893	1.84824	0.0253334
first intron	CpG	69.7966	65.8439	3.95272	0.0100917	1.55235	6.35309	0.0253334
inner exons	CpG	82.503	78.1904	4.3126	0.00547068	2.06639	6.55881	0.0253334
inner introns	CpG	84.1404	80.8425	3.29788	0.0150563	1.04618	5.54958	0.0253334
last exon	CpG	78.072	73.6959	4.3761	0.00352882	2.22766	6.52455	0.0247018
downstream	CpG	68.0013	63.8347	4.16656	0.00440667	2.03402	6.29911	0.0253334
promoter	CHH	0.141844	0.129803	0.0120407	0.53645	-0.0398371	0.0639184	1
first exon	CHH	0.18127	0.157726	0.0235441	0.402056	-0.0451686	0.0922567	1
first intron	CHH	0.152191	0.152045	0.000146639	0.993504	-0.0482906	0.0485839	1
inner exons	CHH	0.156788	0.150683	0.00610484	0.771561	-0.0494925	0.0617022	1
inner introns	CHH	0.156557	0.15718	-0.000622775	0.971817	-0.0480039	0.0467583	1
last exon	CHH	0.166187	0.154294	0.0118933	0.575871	-0.0436508	0.0674373	1
downstream	CHH	0.153126	0.148096	0.00502985	0.786773	-0.044122	0.0541817	1
promoter	CHG	0.152043	0.137878	0.0141646	0.48292	-0.0382214	0.0665506	1
first exon	CHG	0.192953	0.163312	0.0296407	0.350158	-0.0461706	0.105452	1
first intron	CHG	0.162187	0.157678	0.00450942	0.797889	-0.0422884	0.0513072	1
inner exons	CHG	0.195695	0.180562	0.0151328	0.526258	-0.0446191	0.0748847	1
inner introns	CHG	0.167159	0.163802	0.00335724	0.84496	-0.0423007	0.0490152	1
last exon	CHG	0.202693	0.184232	0.0184612	0.442426	-0.0393112	0.0762336	1
downstream	CHG	0.168606	0.15758	0.0110262	0.572571	-0.0395639	0.0616164	1
