# Supplementary material for: Genome-Wide DNA Methylation and Transcriptome Integration Associates DNA Methylation Changes with Bovine Subclinical Mastitis Caused by Staphylococcus chromogenes
Source: Int J Mol Sci. 2023 Jun 20;24(12):10369. doi: 10.3390/ijms241210369 (PMC10299661; doi:10.3390/ijms241210369)
Supplement: Supplementary file 1 [file ijms-24-10369-s001.zip › TableS4 List of differentially methylated cytosine sites in the context of CHG and CHH.xlsx]

## Sheet: TableS4A_CHG_DMC_list
Table S4A List of differentially methylated cytosine sites in the context of CHG
	seqnames	start	end	width	strand	DM_status	pvalue
1	chr1	729912	729912	1	*	hyper	4.16756e-07
3	chr1	1932107	1932107	1	*	hyper	8.68892e-09
7	chr1	1974176	1974176	1	*	hyper	4.14637e-10
12	chr1	2030911	2030911	1	*	hyper	7.68581e-07
14	chr1	2032675	2032675	1	*	hyper	8.80089e-09
16	chr1	2052424	2052424	1	*	hyper	8.25024e-09
20	chr1	2085866	2085866	1	*	hyper	1.11712e-07
23	chr1	2143585	2143585	1	*	hyper	1.30286e-06
26	chr1	2215632	2215632	1	*	hyper	4.30444e-07
30	chr1	2231394	2231394	1	*	hyper	6.69479e-12
33	chr1	2368784	2368784	1	*	hyper	1.8663e-06
35	chr1	2557434	2557434	1	*	hyper	2.12019e-06
38	chr1	2635862	2635862	1	*	hyper	2.49283e-07
40	chr1	2761763	2761763	1	*	hyper	3.38983e-07
45	chr1	2762480	2762480	1	*	hyper	6.57438e-09
50	chr1	2996982	2996982	1	*	hyper	2.42477e-06
54	chr1	3011741	3011741	1	*	hyper	2.75318e-07
59	chr1	3017216	3017216	1	*	hyper	1.3495e-07
64	chr1	3018267	3018267	1	*	hyper	2.27101e-06
69	chr1	3135409	3135409	1	*	hyper	2.37613e-07
74	chr1	3146937	3146937	1	*	hyper	2.91555e-06
79	chr1	4533660	4533660	1	*	hypo	1.73392e-09
82	chr1	4565740	4565740	1	*	hyper	6.92526e-11
85	chr1	4657369	4657369	1	*	hypo	6.81654e-11
88	chr1	4706790	4706790	1	*	hyper	3.90856e-09
91	chr1	5035144	5035144	1	*	hypo	5.87427e-08
94	chr1	5217597	5217597	1	*	hyper	1.13197e-08
96	chr1	5414761	5414761	1	*	hyper	4.24023e-06
99	chr1	5769137	5769137	1	*	hyper	3.71879e-07
102	chr1	6693557	6693557	1	*	hypo	7.75982e-10
104	chr1	8102322	8102322	1	*	hypo	1.3315e-06
107	chr1	8490986	8490986	1	*	hypo	6.33469e-08
110	chr1	8679395	8679395	1	*	hyper	2.36157e-09
113	chr1	8865219	8865219	1	*	hypo	7.76639e-07
116	chr1	9039053	9039053	1	*	hyper	5.54946e-11
119	chr1	9078085	9078085	1	*	hypo	4.01087e-06
121	chr1	9240212	9240212	1	*	hyper	7.0591e-10
123	chr1	9644249	9644249	1	*	hypo	3.54514e-07
125	chr1	9834517	9834517	1	*	hyper	5.6733e-08
128	chr1	9844520	9844520	1	*	hyper	1.25799e-07
130	chr1	10083669	10083669	1	*	hyper	4.52589e-07
133	chr1	10220593	10220593	1	*	hyper	1.09337e-15
136	chr1	10225302	10225302	1	*	hyper	2.83658e-07
139	chr1	10323426	10323426	1	*	hypo	1.5879e-07
144	chr1	10326684	10326684	1	*	hypo	1.20857e-06
148	chr1	10532953	10532953	1	*	hyper	2.06797e-06
153	chr1	10763265	10763265	1	*	hyper	1.34653e-06
158	chr1	10791634	10791634	1	*	hyper	1.92965e-10
161	chr1	11068744	11068744	1	*	hyper	2.64782e-07
163	chr1	11412485	11412485	1	*	hypo	4.56803e-06
166	chr1	11454406	11454406	1	*	hypo	1.72212e-06
168	chr1	11463934	11463934	1	*	hypo	4.76839e-08
171	chr1	11610051	11610051	1	*	hypo	2.73878e-09
173	chr1	11816584	11816584	1	*	hypo	3.80896e-06
175	chr1	12532649	12532649	1	*	hypo	1.33023e-06
178	chr1	13299926	13299926	1	*	hypo	2.14415e-09
181	chr1	15002182	15002182	1	*	hyper	1.08556e-06
183	chr1	16066414	16066414	1	*	hypo	4.40238e-10
186	chr1	17116128	17116128	1	*	hypo	1.10431e-07
188	chr1	17895343	17895343	1	*	hypo	1.78533e-07
191	chr1	17909194	17909194	1	*	hyper	3.58149e-06
194	chr1	18178178	18178178	1	*	hypo	2.89268e-07
197	chr1	18574758	18574758	1	*	hypo	9.02011e-08
202	chr1	18956961	18956961	1	*	hypo	1.90179e-08
205	chr1	19043389	19043389	1	*	hypo	3.37426e-06
208	chr1	19235081	19235081	1	*	hypo	5.17285e-08
213	chr1	19325055	19325055	1	*	hypo	1.08788e-08
215	chr1	19462131	19462131	1	*	hypo	3.77355e-06
220	chr1	19531822	19531822	1	*	hypo	2.09328e-07
223	chr1	22578216	22578216	1	*	hypo	3.17298e-06
225	chr1	24572610	24572610	1	*	hypo	2.43856e-06
227	chr1	25272426	25272426	1	*	hyper	4.41456e-07
230	chr1	27582607	27582607	1	*	hyper	3.81999e-06
233	chr1	28216503	28216503	1	*	hyper	3.54617e-08
236	chr1	28434474	28434474	1	*	hyper	6.19377e-10
238	chr1	29073037	29073037	1	*	hypo	2.048e-06
241	chr1	29109486	29109486	1	*	hyper	2.09142e-07
245	chr1	29118036	29118036	1	*	hypo	6.46696e-08
249	chr1	29132833	29132833	1	*	hypo	3.10127e-06
254	chr1	29280033	29280033	1	*	hypo	9.54852e-07
258	chr1	29543452	29543452	1	*	hypo	1.10906e-08
261	chr1	29795401	29795401	1	*	hypo	8.31099e-08
263	chr1	30069160	30069160	1	*	hyper	6.5746e-07
265	chr1	30637134	30637134	1	*	hyper	8.6081e-07
268	chr1	34467259	34467259	1	*	hypo	5.46826e-08
271	chr1	34868803	34868803	1	*	hypo	1.41307e-07
274	chr1	36481335	36481335	1	*	hyper	1.19175e-07
276	chr1	37104430	37104430	1	*	hyper	8.1342e-07
278	chr1	38301782	38301782	1	*	hyper	9.36214e-07
281	chr1	38945978	38945978	1	*	hyper	4.41601e-07
284	chr1	38947279	38947279	1	*	hyper	1.54412e-07
286	chr1	39599116	39599116	1	*	hyper	3.23441e-07
289	chr1	39643914	39643914	1	*	hyper	2.29251e-08
293	chr1	42050143	42050143	1	*	hypo	2.46646e-08
297	chr1	42118932	42118932	1	*	hypo	1.9452e-10
299	chr1	42859690	42859690	1	*	hyper	6.67026e-07
302	chr1	43702264	43702264	1	*	hyper	8.33847e-10
305	chr1	48493336	48493336	1	*	hypo	2.40016e-07
308	chr1	58154469	58154469	1	*	hyper	2.23198e-07
312	chr1	58158688	58158688	1	*	hypo	6.3463e-07
316	chr1	59067544	59067544	1	*	hyper	2.2306e-07
318	chr1	62682916	62682916	1	*	hypo	3.04106e-07
320	chr1	62825485	62825485	1	*	hypo	3.34625e-07
323	chr1	64461440	64461440	1	*	hyper	4.76027e-07
326	chr1	67143552	67143552	1	*	hyper	8.63165e-09
331	chr1	67477883	67477883	1	*	hyper	5.06467e-07
335	chr1	68189276	68189276	1	*	hyper	1.36214e-07
337	chr1	69014963	69014963	1	*	hypo	6.5708e-14
341	chr1	69027437	69027437	1	*	hypo	8.51002e-13
345	chr1	69037246	69037246	1	*	hypo	5.91749e-07
350	chr1	69046917	69046917	1	*	hyper	8.14702e-08
354	chr1	69056579	69056579	1	*	hypo	5.87775e-10
359	chr1	69086853	69086853	1	*	hypo	1.14954e-06
363	chr1	71115151	71115151	1	*	hyper	1.04223e-06
365	chr1	72424778	72424778	1	*	hyper	1.22449e-06
369	chr1	72867736	72867736	1	*	hypo	9.73387e-08
371	chr1	73281387	73281387	1	*	hypo	2.26723e-07
373	chr1	74181259	74181259	1	*	hypo	6.32552e-08
378	chr1	74206058	74206058	1	*	hypo	5.92418e-08
381	chr1	74632634	74632634	1	*	hypo	1.38327e-10
384	chr1	75443702	75443702	1	*	hyper	1.82382e-08
386	chr1	75469905	75469905	1	*	hyper	8.79144e-08
389	chr1	75473306	75473306	1	*	hyper	3.15799e-07
391	chr1	76283713	76283713	1	*	hyper	1.73484e-08
393	chr1	76332458	76332458	1	*	hypo	7.11405e-07
395	chr1	77179294	77179294	1	*	hyper	4.18418e-09
399	chr1	78161814	78161814	1	*	hyper	2.37008e-07
403	chr1	80195803	80195803	1	*	hyper	4.58887e-08
406	chr1	81127107	81127107	1	*	hyper	1.7661e-07
409	chr1	82863903	82863903	1	*	hyper	3.74935e-07
411	chr1	82867035	82867035	1	*	hyper	1.04504e-08
413	chr1	83675588	83675588	1	*	hypo	7.31087e-08
415	chr1	83739722	83739722	1	*	hyper	6.65004e-07
417	chr1	84189986	84189986	1	*	hypo	1.04778e-07
420	chr1	87755512	87755512	1	*	hyper	1.07361e-07
424	chr1	93961380	93961380	1	*	hyper	3.29809e-07
429	chr1	102031413	102031413	1	*	hyper	1.2029e-08
432	chr1	102849921	102849921	1	*	hypo	3.36816e-08
435	chr1	102977776	102977776	1	*	hypo	4.84724e-07
438	chr1	104198856	104198856	1	*	hypo	4.46352e-07
441	chr1	105441081	105441081	1	*	hyper	1.56512e-07
444	chr1	111273538	111273538	1	*	hyper	9.82145e-07
448	chr1	111384594	111384594	1	*	hyper	3.9756e-06
452	chr1	111398826	111398826	1	*	hyper	1.34631e-06
456	chr1	111749110	111749110	1	*	hypo	6.54211e-07
461	chr1	111758534	111758534	1	*	hyper	3.48231e-14
466	chr1	111784922	111784922	1	*	hypo	7.41935e-06
470	chr1	111787796	111787796	1	*	hypo	2.11486e-07
475	chr1	111788449	111788449	1	*	hyper	7.41433e-10
479	chr1	111792218	111792218	1	*	hyper	4.06279e-10
484	chr1	111844307	111844307	1	*	hypo	4.0194e-09
489	chr1	111857701	111857701	1	*	hypo	3.1847e-06
492	chr1	111882496	111882496	1	*	hypo	2.09437e-06
495	chr1	111958767	111958767	1	*	hypo	1.97689e-06
497	chr1	111963114	111963114	1	*	hypo	2.07495e-10
500	chr1	112343207	112343207	1	*	hypo	1.89284e-11
503	chr1	112354999	112354999	1	*	hypo	5.20709e-07
506	chr1	112715703	112715703	1	*	hypo	3.73718e-06
508	chr1	115042281	115042281	1	*	hyper	4.9648e-07
510	chr1	115482303	115482303	1	*	hyper	2.78911e-07
513	chr1	115601471	115601471	1	*	hypo	6.28084e-06
515	chr1	115621324	115621324	1	*	hyper	6.31738e-06
518	chr1	116726881	116726881	1	*	hypo	4.19571e-06
526	chr1	116790309	116790309	1	*	hypo	1.19963e-07
533	chr1	117012748	117012748	1	*	hypo	5.64586e-07
537	chr1	117888352	117888352	1	*	hyper	2.89874e-06
539	chr1	118132701	118132701	1	*	hyper	4.88404e-06
542	chr1	118296172	118296172	1	*	hyper	5.2942e-06
547	chr1	118383612	118383612	1	*	hypo	8.13824e-10
549	chr1	118394464	118394464	1	*	hypo	5.26977e-06
551	chr1	118446243	118446243	1	*	hyper	1.60843e-06
554	chr1	118519217	118519217	1	*	hypo	3.3164e-07
559	chr1	118540283	118540283	1	*	hypo	4.46942e-06
563	chr1	118781279	118781279	1	*	hyper	3.81925e-06
566	chr1	119160117	119160117	1	*	hyper	7.74638e-08
570	chr1	119197284	119197284	1	*	hypo	1.01728e-06
573	chr1	120480602	120480602	1	*	hyper	1.75453e-07
576	chr1	120482271	120482271	1	*	hypo	2.77994e-06
578	chr1	120550187	120550187	1	*	hyper	1.5319e-09
581	chr1	120707729	120707729	1	*	hypo	2.15028e-06
584	chr1	120982172	120982172	1	*	hypo	1.8892e-06
587	chr1	121207524	121207524	1	*	hypo	2.62878e-10
589	chr1	121458955	121458955	1	*	hyper	2.26196e-06
592	chr1	123809939	123809939	1	*	hyper	7.32319e-06
595	chr1	124331888	124331888	1	*	hypo	3.67635e-07
598	chr1	124483320	124483320	1	*	hyper	1.9163e-06
600	chr1	125229098	125229098	1	*	hyper	1.60723e-06
605	chr1	125425093	125425093	1	*	hyper	5.59698e-06
610	chr1	125557195	125557195	1	*	hyper	3.31283e-06
615	chr1	125600182	125600182	1	*	hypo	7.74188e-07
619	chr1	125657859	125657859	1	*	hypo	6.97624e-06
624	chr1	125659293	125659293	1	*	hypo	1.53202e-08
629	chr1	125689697	125689697	1	*	hyper	4.73589e-06
633	chr1	126182046	126182046	1	*	hyper	1.19056e-08
638	chr1	126310363	126310363	1	*	hypo	4.56411e-07
643	chr1	126310542	126310542	1	*	hypo	5.75284e-10
648	chr1	126990749	126990749	1	*	hyper	6.8841e-10
653	chr1	127172738	127172738	1	*	hyper	1.3961e-07
657	chr1	127179454	127179454	1	*	hyper	3.79939e-06
661	chr1	127242774	127242774	1	*	hypo	2.80389e-06
664	chr1	127503863	127503863	1	*	hyper	4.17379e-07
667	chr1	127504000	127504000	1	*	hyper	4.91901e-07
670	chr1	127844080	127844080	1	*	hypo	2.77914e-06
674	chr1	127942956	127942956	1	*	hyper	1.54281e-07
676	chr1	127964972	127964972	1	*	hypo	3.63755e-06
679	chr1	128025070	128025070	1	*	hyper	4.19505e-07
683	chr1	128073797	128073797	1	*	hypo	1.66528e-06
686	chr1	128084020	128084020	1	*	hypo	4.36289e-07
689	chr1	128084035	128084035	1	*	hypo	1.58041e-07
692	chr1	128184037	128184037	1	*	hyper	1.78406e-07
694	chr1	128363330	128363330	1	*	hypo	1.52229e-12
697	chr1	128611536	128611536	1	*	hyper	8.09631e-08
702	chr1	128721759	128721759	1	*	hypo	3.36499e-10
706	chr1	128741711	128741711	1	*	hypo	7.44938e-07
710	chr1	128746843	128746843	1	*	hypo	1.41043e-06
715	chr1	128824781	128824781	1	*	hypo	1.39784e-06
720	chr1	129546751	129546751	1	*	hyper	1.62292e-06
723	chr1	129600389	129600389	1	*	hyper	1.70009e-08
726	chr1	129726309	129726309	1	*	hyper	1.0656e-08
730	chr1	129746876	129746876	1	*	hypo	6.61938e-07
735	chr1	129788848	129788848	1	*	hyper	2.61864e-07
737	chr1	129843921	129843921	1	*	hyper	2.37748e-07
739	chr1	129976256	129976256	1	*	hyper	2.59028e-06
741	chr1	130257552	130257552	1	*	hypo	5.10169e-13
744	chr1	130274514	130274514	1	*	hyper	1.2896e-07
747	chr1	130278956	130278956	1	*	hypo	1.94883e-12
749	chr1	130485905	130485905	1	*	hypo	1.84278e-11
751	chr1	130541224	130541224	1	*	hyper	2.872e-09
754	chr1	130565283	130565283	1	*	hyper	4.33271e-10
756	chr1	130618672	130618672	1	*	hyper	2.12854e-06
758	chr1	130636332	130636332	1	*	hyper	1.02181e-06
760	chr1	130682518	130682518	1	*	hyper	4.44409e-06
763	chr1	130735417	130735417	1	*	hyper	2.30264e-10
767	chr1	130972233	130972233	1	*	hypo	1.1373e-06
769	chr1	130995215	130995215	1	*	hyper	6.37656e-06
771	chr1	131243112	131243112	1	*	hyper	2.10083e-07
773	chr1	131585487	131585487	1	*	hyper	1.72025e-06
776	chr1	131637444	131637444	1	*	hyper	2.36845e-07
779	chr1	132154386	132154386	1	*	hypo	2.93749e-10
782	chr1	132176570	132176570	1	*	hyper	1.50678e-07
786	chr1	132250172	132250172	1	*	hypo	5.37281e-06
791	chr1	132335101	132335101	1	*	hyper	6.12766e-09
795	chr1	132566037	132566037	1	*	hyper	3.28778e-09
798	chr1	133126442	133126442	1	*	hyper	8.20543e-08
801	chr1	133188835	133188835	1	*	hyper	4.42106e-13
804	chr1	133189772	133189772	1	*	hyper	8.94843e-09
807	chr1	133277677	133277677	1	*	hyper	4.62592e-10
810	chr1	133353784	133353784	1	*	hypo	3.27566e-10
813	chr1	133439563	133439563	1	*	hyper	1.0276e-17
816	chr1	133578217	133578217	1	*	hyper	3.67837e-06
819	chr1	133598718	133598718	1	*	hyper	5.73472e-07
822	chr1	133658954	133658954	1	*	hyper	1.27811e-06
824	chr1	133943547	133943547	1	*	hypo	1.46485e-07
826	chr1	133950143	133950143	1	*	hyper	8.98004e-09
828	chr1	134414267	134414267	1	*	hyper	3.96315e-06
832	chr1	134555133	134555133	1	*	hyper	2.12234e-06
834	chr1	134663334	134663334	1	*	hypo	1.48036e-06
836	chr1	135492416	135492416	1	*	hypo	4.56313e-06
840	chr1	136060090	136060090	1	*	hyper	5.25869e-06
844	chr1	137745847	137745847	1	*	hyper	3.22214e-07
847	chr1	137752799	137752799	1	*	hyper	6.60046e-07
850	chr1	138420784	138420784	1	*	hyper	1.64957e-06
855	chr1	138578655	138578655	1	*	hypo	2.63533e-07
858	chr1	138691352	138691352	1	*	hypo	1.20494e-07
860	chr1	139123470	139123470	1	*	hyper	1.11505e-05
863	chr1	139166123	139166123	1	*	hypo	2.47801e-07
865	chr1	139269618	139269618	1	*	hyper	1.42506e-06
870	chr1	139381573	139381573	1	*	hyper	8.51819e-06
873	chr1	139457105	139457105	1	*	hyper	6.226e-07
877	chr1	139458962	139458962	1	*	hyper	8.45692e-08
880	chr1	140003816	140003816	1	*	hyper	4.50675e-07
884	chr1	140009966	140009966	1	*	hyper	6.65934e-08
886	chr1	140050982	140050982	1	*	hyper	9.52779e-06
889	chr1	140158399	140158399	1	*	hyper	1.04407e-05
892	chr1	140446383	140446383	1	*	hypo	3.8976e-08
895	chr1	140549151	140549151	1	*	hyper	1.7805e-06
897	chr1	140710448	140710448	1	*	hyper	7.10612e-07
899	chr1	141608625	141608625	1	*	hyper	1.28345e-06
902	chr1	141706945	141706945	1	*	hypo	1.45905e-06
905	chr1	141906778	141906778	1	*	hypo	9.14822e-06
908	chr1	141947644	141947644	1	*	hyper	3.882e-09
910	chr1	141992925	141992925	1	*	hyper	9.06619e-06
912	chr1	142809107	142809107	1	*	hyper	1.8928e-07
915	chr1	142898994	142898994	1	*	hyper	9.37911e-06
917	chr1	143096994	143096994	1	*	hypo	5.34668e-08
921	chr1	143116587	143116587	1	*	hyper	7.86249e-07
924	chr1	143525188	143525188	1	*	hypo	1.43027e-09
927	chr1	143756778	143756778	1	*	hyper	2.70187e-06
929	chr1	143758900	143758900	1	*	hypo	4.77045e-08
931	chr1	143764326	143764326	1	*	hyper	7.59536e-08
933	chr1	143776242	143776242	1	*	hyper	1.92641e-06
936	chr1	143781585	143781585	1	*	hyper	1.75876e-06
939	chr1	143837006	143837006	1	*	hyper	3.68451e-07
941	chr1	143842959	143842959	1	*	hyper	5.55514e-06
944	chr1	143918139	143918139	1	*	hypo	1.30329e-05
947	chr1	144016717	144016717	1	*	hypo	9.87186e-06
951	chr1	144057341	144057341	1	*	hypo	7.35765e-14
954	chr1	144290547	144290547	1	*	hypo	5.05481e-11
956	chr1	144330477	144330477	1	*	hypo	2.45085e-13
960	chr1	144341279	144341279	1	*	hypo	6.28842e-06
965	chr1	144672264	144672264	1	*	hyper	2.4082e-08
969	chr1	144763871	144763871	1	*	hyper	8.4041e-08
973	chr1	144828332	144828332	1	*	hypo	8.01073e-08
977	chr1	145115607	145115607	1	*	hyper	2.09092e-06
979	chr1	145120457	145120457	1	*	hyper	2.18692e-07
981	chr1	145125471	145125471	1	*	hyper	8.31801e-06
984	chr1	145125617	145125617	1	*	hyper	1.92216e-07
986	chr1	145128464	145128464	1	*	hyper	2.74613e-08
988	chr1	145131695	145131695	1	*	hyper	6.44021e-07
990	chr1	145134276	145134276	1	*	hypo	2.89031e-07
992	chr1	145378852	145378852	1	*	hypo	1.95024e-06
994	chr1	145581715	145581715	1	*	hypo	4.31339e-12
998	chr1	145684629	145684629	1	*	hypo	1.6266e-11
1003	chr1	145685552	145685552	1	*	hypo	2.94653e-11
1008	chr1	145685582	145685582	1	*	hypo	4.71303e-11
1013	chr1	145686690	145686690	1	*	hypo	8.40812e-07
1018	chr1	145711723	145711723	1	*	hypo	5.62428e-10
1020	chr1	145763483	145763483	1	*	hyper	1.96624e-07
1022	chr1	145891343	145891343	1	*	hyper	5.33979e-07
1026	chr1	146078060	146078060	1	*	hyper	3.4856e-07
1028	chr1	146274688	146274688	1	*	hyper	2.80195e-06
1032	chr1	146341358	146341358	1	*	hyper	1.15693e-06
1037	chr1	146581438	146581438	1	*	hyper	2.29073e-18
1039	chr1	146759525	146759525	1	*	hypo	9.82996e-09
1042	chr1	146775337	146775337	1	*	hyper	1.22215e-07
1044	chr1	146876812	146876812	1	*	hyper	9.36214e-07
1047	chr1	146890799	146890799	1	*	hyper	1.27157e-07
1050	chr1	146968031	146968031	1	*	hypo	2.49798e-08
1053	chr1	147089999	147089999	1	*	hyper	1.68949e-09
1057	chr1	147382819	147382819	1	*	hyper	1.38641e-13
1060	chr1	147387427	147387427	1	*	hyper	6.20342e-06
1063	chr1	147430591	147430591	1	*	hypo	1.17047e-12
1066	chr1	147624810	147624810	1	*	hyper	8.4609e-09
1068	chr1	147674872	147674872	1	*	hyper	1.00289e-05
1071	chr1	147777183	147777183	1	*	hypo	6.80433e-07
1073	chr1	147873019	147873019	1	*	hypo	5.84132e-11
1076	chr1	147894367	147894367	1	*	hypo	7.71896e-06
1079	chr1	147914609	147914609	1	*	hyper	2.16459e-07
1082	chr1	147968413	147968413	1	*	hypo	3.03998e-09
1085	chr1	148314091	148314091	1	*	hypo	5.63972e-06
1088	chr1	148525281	148525281	1	*	hyper	1.67143e-20
1091	chr1	148528971	148528971	1	*	hyper	1.13601e-09
1093	chr1	148530272	148530272	1	*	hyper	2.44863e-09
1096	chr1	148539702	148539702	1	*	hyper	1.16553e-21
1099	chr1	148546925	148546925	1	*	hyper	7.98503e-16
1101	chr1	148551582	148551582	1	*	hyper	2.46794e-18
1103	chr1	148611335	148611335	1	*	hyper	1.69411e-06
1106	chr1	148646664	148646664	1	*	hyper	1.54062e-08
1108	chr1	148908366	148908366	1	*	hyper	2.11677e-07
1111	chr1	148908464	148908464	1	*	hypo	2.70319e-07
1113	chr1	148909672	148909672	1	*	hypo	9.91138e-06
1115	chr1	148911143	148911143	1	*	hypo	1.03334e-07
1117	chr1	148950133	148950133	1	*	hypo	1.28343e-05
1119	chr1	149175937	149175937	1	*	hyper	3.75603e-07
1121	chr1	149235342	149235342	1	*	hyper	1.09163e-06
1124	chr1	149253048	149253048	1	*	hyper	2.16641e-06
1127	chr1	149254907	149254907	1	*	hyper	5.13443e-06
1130	chr1	149271646	149271646	1	*	hyper	2.65965e-13
1133	chr1	149296509	149296509	1	*	hyper	8.93818e-10
1135	chr1	149334254	149334254	1	*	hyper	5.29787e-14
1140	chr1	149360085	149360085	1	*	hyper	1.91458e-14
1144	chr1	149375609	149375609	1	*	hyper	9.06304e-13
1148	chr1	149375644	149375644	1	*	hyper	2.29642e-13
1152	chr1	149408064	149408064	1	*	hyper	2.99775e-12
1157	chr1	149412474	149412474	1	*	hyper	7.26458e-12
1161	chr1	149423408	149423408	1	*	hyper	1.09496e-09
1166	chr1	149430688	149430688	1	*	hyper	1.00406e-08
1171	chr1	149430781	149430781	1	*	hyper	2.79495e-09
1175	chr1	149431147	149431147	1	*	hyper	3.96619e-13
1179	chr1	149441162	149441162	1	*	hypo	3.18354e-08
1182	chr1	149607409	149607409	1	*	hypo	5.76877e-06
1184	chr1	149611096	149611096	1	*	hyper	2.12567e-06
1186	chr1	149779427	149779427	1	*	hyper	7.41376e-07
1189	chr1	149813270	149813270	1	*	hypo	5.23796e-07
1191	chr1	149842248	149842248	1	*	hypo	2.60687e-08
1194	chr1	149916852	149916852	1	*	hyper	3.00862e-06
1197	chr1	150057372	150057372	1	*	hypo	7.68536e-06
1199	chr1	150342183	150342183	1	*	hyper	1.83103e-10
1202	chr1	150798432	150798432	1	*	hypo	1.35205e-06
1206	chr1	150798541	150798541	1	*	hypo	4.90328e-06
1210	chr1	150802971	150802971	1	*	hypo	1.96205e-07
1214	chr1	150905865	150905865	1	*	hyper	1.16093e-06
1217	chr1	151028125	151028125	1	*	hyper	5.49928e-12
1220	chr1	151050463	151050463	1	*	hyper	1.42798e-10
1222	chr1	151051722	151051722	1	*	hyper	8.0072e-12
1225	chr1	151058610	151058610	1	*	hyper	1.52402e-12
1228	chr1	151155381	151155381	1	*	hyper	8.40871e-09
1231	chr1	151245760	151245760	1	*	hyper	5.7228e-07
1233	chr1	151324936	151324936	1	*	hypo	2.27262e-08
1235	chr1	151351884	151351884	1	*	hyper	7.11517e-13
1237	chr1	151355908	151355908	1	*	hyper	3.75144e-08
1240	chr1	151358901	151358901	1	*	hyper	1.19383e-11
1243	chr1	151381018	151381018	1	*	hyper	7.42184e-11
1245	chr1	151418330	151418330	1	*	hyper	1.86872e-08
1247	chr1	151420848	151420848	1	*	hyper	2.54681e-06
1250	chr1	151468316	151468316	1	*	hyper	1.98028e-07
1253	chr1	151492138	151492138	1	*	hyper	1.25509e-11
1258	chr1	151562081	151562081	1	*	hyper	1.05776e-05
1263	chr1	151597998	151597998	1	*	hyper	4.64395e-10
1266	chr1	151652792	151652792	1	*	hypo	4.23117e-06
1268	chr1	151787491	151787491	1	*	hyper	8.17939e-06
1271	chr1	151799386	151799386	1	*	hyper	1.67903e-06
1274	chr1	152078856	152078856	1	*	hyper	7.42647e-07
1276	chr1	152265017	152265017	1	*	hyper	4.17038e-07
1281	chr1	152269514	152269514	1	*	hyper	2.45679e-11
1286	chr1	152270209	152270209	1	*	hyper	2.45105e-06
1291	chr1	152274061	152274061	1	*	hyper	2.55465e-11
1296	chr1	152338127	152338127	1	*	hyper	2.7759e-07
1300	chr1	152428934	152428934	1	*	hypo	2.83312e-06
1302	chr1	152566140	152566140	1	*	hypo	1.91416e-07
1304	chr1	152751574	152751574	1	*	hyper	1.14954e-06
1308	chr1	152889382	152889382	1	*	hyper	2.01662e-09
1310	chr1	153086498	153086498	1	*	hypo	2.38694e-06
1313	chr1	153143979	153143979	1	*	hyper	8.75533e-14
1316	chr1	153156121	153156121	1	*	hyper	5.84942e-12
1319	chr1	153156906	153156906	1	*	hyper	3.77225e-12
1321	chr1	153161489	153161489	1	*	hypo	3.79252e-06
1323	chr1	153164135	153164135	1	*	hyper	1.24412e-10
1326	chr1	153168835	153168835	1	*	hyper	2.10593e-12
1328	chr1	153186978	153186978	1	*	hyper	1.69875e-09
1333	chr1	153412429	153412429	1	*	hypo	3.34349e-06
1335	chr1	153431585	153431585	1	*	hyper	3.76624e-06
1337	chr1	153475167	153475167	1	*	hyper	1.60244e-08
1339	chr1	153475561	153475561	1	*	hyper	3.31982e-09
1342	chr1	153484987	153484987	1	*	hyper	3.57328e-08
1344	chr1	153511039	153511039	1	*	hyper	2.96885e-07
1347	chr1	153514440	153514440	1	*	hypo	6.58008e-09
1349	chr1	153519828	153519828	1	*	hyper	2.66341e-07
1351	chr1	153520278	153520278	1	*	hyper	4.21532e-08
1353	chr1	153564861	153564861	1	*	hyper	4.80489e-07
1355	chr1	153624126	153624126	1	*	hyper	7.78799e-08
1358	chr1	153627556	153627556	1	*	hypo	1.5603e-06
1361	chr1	153701679	153701679	1	*	hyper	6.62989e-08
1363	chr1	153793912	153793912	1	*	hypo	5.64877e-08
1365	chr1	153794231	153794231	1	*	hypo	8.6482e-10
1367	chr1	153805154	153805154	1	*	hypo	7.84551e-06
1369	chr1	153932878	153932878	1	*	hyper	9.29455e-10
1374	chr1	154049388	154049388	1	*	hyper	1.33188e-06
1378	chr1	154054354	154054354	1	*	hyper	3.41839e-07
1382	chr1	154514478	154514478	1	*	hyper	7.38737e-09
1386	chr1	154532178	154532178	1	*	hyper	1.1189e-10
1391	chr1	154622123	154622123	1	*	hypo	3.56833e-07
1394	chr1	154807598	154807598	1	*	hyper	4.10671e-10
1397	chr1	154857450	154857450	1	*	hyper	1.46231e-11
1400	chr1	154868516	154868516	1	*	hyper	2.75314e-06
1402	chr1	154877602	154877602	1	*	hyper	6.47691e-09
1405	chr1	154881005	154881005	1	*	hyper	1.92684e-12
1408	chr1	154884463	154884463	1	*	hyper	5.51203e-07
1411	chr1	154924151	154924151	1	*	hypo	8.13951e-06
1414	chr1	154958830	154958830	1	*	hyper	9.76274e-12
1416	chr1	154974648	154974648	1	*	hyper	1.00865e-07
1418	chr1	154985333	154985333	1	*	hyper	8.1421e-11
1420	chr1	155083371	155083371	1	*	hypo	2.04303e-06
1422	chr1	155088164	155088164	1	*	hypo	8.03866e-06
1424	chr1	155089993	155089993	1	*	hypo	1.00077e-06
1427	chr1	155116665	155116665	1	*	hyper	7.16951e-12
1429	chr1	155137099	155137099	1	*	hyper	2.11257e-09
1431	chr1	155166867	155166867	1	*	hyper	1.01182e-12
1433	chr1	155221456	155221456	1	*	hyper	2.06167e-09
1435	chr1	155226756	155226756	1	*	hyper	1.35199e-07
1437	chr1	155284500	155284500	1	*	hyper	3.89636e-09
1440	chr1	155480261	155480261	1	*	hyper	7.3572e-06
1444	chr1	155592607	155592607	1	*	hypo	4.53364e-08
1446	chr1	156646248	156646248	1	*	hyper	4.16987e-07
1448	chr1	156769910	156769910	1	*	hypo	9.80153e-09
1451	chr1	156938417	156938417	1	*	hypo	6.79963e-07
1454	chr1	157598214	157598214	1	*	hypo	4.05338e-06
1456	chr1	157603769	157603769	1	*	hypo	1.33835e-07
1458	chr2	3970712	3970712	1	*	hypo	4.25475e-07
1461	chr2	4151195	4151195	1	*	hypo	3.07221e-07
1463	chr2	4466065	4466065	1	*	hypo	5.07452e-07
1465	chr2	4495740	4495740	1	*	hyper	1.69914e-06
1468	chr2	4906865	4906865	1	*	hyper	1.91226e-06
1471	chr2	5422428	5422428	1	*	hypo	2.87859e-07
1475	chr2	5573976	5573976	1	*	hyper	3.19826e-06
1478	chr2	5608620	5608620	1	*	hyper	3.99247e-06
1480	chr2	5784357	5784357	1	*	hyper	4.9655e-09
1482	chr2	5900487	5900487	1	*	hyper	3.54767e-06
1484	chr2	5901698	5901698	1	*	hyper	4.58051e-07
1486	chr2	6560216	6560216	1	*	hyper	4.2313e-10
1491	chr2	6561566	6561566	1	*	hyper	1.15636e-08
1495	chr2	7718284	7718284	1	*	hypo	5.0801e-08
1498	chr2	8262954	8262954	1	*	hypo	4.41757e-07
1501	chr2	9778153	9778153	1	*	hypo	7.19819e-07
1503	chr2	12147111	12147111	1	*	hypo	3.30297e-06
1506	chr2	12417109	12417109	1	*	hypo	1.45953e-06
1509	chr2	12926398	12926398	1	*	hyper	2.31546e-07
1512	chr2	14002822	14002822	1	*	hyper	3.88102e-06
1514	chr2	15541143	15541143	1	*	hyper	1.46859e-06
1517	chr2	15571856	15571856	1	*	hyper	1.40928e-07
1520	chr2	15600200	15600200	1	*	hypo	1.35328e-07
1522	chr2	15763933	15763933	1	*	hypo	3.02644e-07
1525	chr2	16778598	16778598	1	*	hypo	4.52872e-08
1527	chr2	17452431	17452431	1	*	hyper	2.3161e-08
1529	chr2	17495603	17495603	1	*	hyper	2.32597e-09
1531	chr2	18467323	18467323	1	*	hyper	1.17648e-06
1534	chr2	18497678	18497678	1	*	hyper	1.55406e-07
1536	chr2	18503715	18503715	1	*	hyper	6.93136e-11
1539	chr2	18511345	18511345	1	*	hyper	1.77455e-11
1542	chr2	18542425	18542425	1	*	hyper	4.17384e-07
1545	chr2	18610828	18610828	1	*	hypo	9.02626e-08
1548	chr2	18617772	18617772	1	*	hyper	6.0594e-10
1551	chr2	19271165	19271165	1	*	hyper	9.59873e-09
1554	chr2	19476348	19476348	1	*	hyper	1.53928e-12
1557	chr2	19516698	19516698	1	*	hyper	5.20058e-14
1559	chr2	19553966	19553966	1	*	hyper	8.86902e-11
1562	chr2	19559346	19559346	1	*	hyper	1.10271e-08
1564	chr2	19780693	19780693	1	*	hypo	9.64767e-10
1567	chr2	19780719	19780719	1	*	hypo	3.83822e-07
1570	chr2	20237524	20237524	1	*	hypo	1.30402e-06
1572	chr2	20415877	20415877	1	*	hyper	7.36727e-08
1574	chr2	20904478	20904478	1	*	hyper	5.06001e-07
1577	chr2	21453933	21453933	1	*	hyper	7.31943e-10
1579	chr2	21468372	21468372	1	*	hyper	1.8163e-06
1582	chr2	21547653	21547653	1	*	hyper	1.40504e-10
1584	chr2	21552716	21552716	1	*	hyper	2.3448e-10
1586	chr2	21555629	21555629	1	*	hypo	1.54765e-06
1589	chr2	21569673	21569673	1	*	hypo	4.11888e-07
1592	chr2	21616099	21616099	1	*	hyper	7.08999e-07
1595	chr2	21620375	21620375	1	*	hyper	1.73725e-07
1597	chr2	21659638	21659638	1	*	hyper	1.7703e-11
1599	chr2	21799354	21799354	1	*	hyper	1.5524e-08
1602	chr2	21816381	21816381	1	*	hyper	2.35374e-07
1604	chr2	22580206	22580206	1	*	hypo	3.10205e-06
1609	chr2	22770306	22770306	1	*	hypo	6.42196e-13
1612	chr2	22803713	22803713	1	*	hyper	1.79939e-06
1614	chr2	23222651	23222651	1	*	hyper	2.0517e-08
1616	chr2	23234374	23234374	1	*	hyper	2.82249e-06
1618	chr2	25732839	25732839	1	*	hypo	6.81719e-08
1620	chr2	25837057	25837057	1	*	hypo	2.06797e-06
1623	chr2	26233822	26233822	1	*	hypo	8.24622e-10
1625	chr2	26592098	26592098	1	*	hyper	1.05965e-06
1628	chr2	26763169	26763169	1	*	hyper	4.66628e-07
1632	chr2	27016738	27016738	1	*	hypo	2.32743e-09
1634	chr2	27089784	27089784	1	*	hypo	1.58551e-06
1639	chr2	31528934	31528934	1	*	hyper	7.26437e-07
1641	chr2	33365890	33365890	1	*	hypo	1.86191e-06
1644	chr2	36275127	36275127	1	*	hypo	2.28993e-08
1648	chr2	40070591	40070591	1	*	hyper	4.93302e-08
1650	chr2	40143280	40143280	1	*	hyper	3.06422e-09
1653	chr2	40219082	40219082	1	*	hyper	3.52755e-07
1655	chr2	40318941	40318941	1	*	hyper	4.69612e-08
1658	chr2	40353008	40353008	1	*	hyper	7.50569e-08
1661	chr2	40415084	40415084	1	*	hyper	7.43365e-07
1664	chr2	41765409	41765409	1	*	hyper	7.46362e-08
1668	chr2	42915115	42915115	1	*	hyper	7.17222e-13
1670	chr2	42915198	42915198	1	*	hyper	1.46448e-10
1672	chr2	43762907	43762907	1	*	hyper	9.55106e-07
1677	chr2	43835121	43835121	1	*	hyper	1.10905e-07
1681	chr2	43919564	43919564	1	*	hyper	2.23957e-07
1683	chr2	44654091	44654091	1	*	hyper	1.0229e-06
1685	chr2	45126491	45126491	1	*	hypo	4.87561e-07
1687	chr2	46012278	46012278	1	*	hyper	3.97725e-08
1689	chr2	46618381	46618381	1	*	hypo	1.62562e-06
1691	chr2	46855286	46855286	1	*	hyper	1.30069e-07
1694	chr2	47776532	47776532	1	*	hypo	8.60267e-07
1696	chr2	48103880	48103880	1	*	hyper	1.46558e-08
1699	chr2	48108551	48108551	1	*	hyper	2.31439e-06
1702	chr2	48149692	48149692	1	*	hypo	1.69474e-08
1705	chr2	49464858	49464858	1	*	hypo	1.42501e-08
1708	chr2	50909878	50909878	1	*	hyper	2.29936e-06
1711	chr2	51791914	51791914	1	*	hyper	8.18129e-07
1714	chr2	51799815	51799815	1	*	hyper	3.61147e-08
1716	chr2	51864569	51864569	1	*	hyper	4.5396e-07
1718	chr2	52124399	52124399	1	*	hypo	3.67976e-10
1721	chr2	52125150	52125150	1	*	hypo	7.20524e-10
1723	chr2	53497171	53497171	1	*	hypo	4.98184e-07
1727	chr2	53521386	53521386	1	*	hypo	1.82661e-06
1731	chr2	53523166	53523166	1	*	hyper	3.46987e-11
1735	chr2	53553186	53553186	1	*	hypo	1.33897e-07
1740	chr2	54233613	54233613	1	*	hypo	5.9078e-07
1742	chr2	56346535	56346535	1	*	hypo	2.01147e-08
1744	chr2	56669987	56669987	1	*	hyper	5.53909e-08
1747	chr2	56812976	56812976	1	*	hypo	5.97193e-07
1750	chr2	57663737	57663737	1	*	hypo	1.68862e-08
1753	chr2	57962482	57962482	1	*	hypo	1.11175e-06
1755	chr2	58409941	58409941	1	*	hyper	1.4314e-06
1759	chr2	58859419	58859419	1	*	hyper	1.23467e-06
1761	chr2	61395311	61395311	1	*	hyper	2.37538e-07
1766	chr2	61836727	61836727	1	*	hypo	1.10099e-07
1769	chr2	63021920	63021920	1	*	hypo	1.50444e-07
1773	chr2	63231238	63231238	1	*	hypo	1.19875e-06
1775	chr2	63865919	63865919	1	*	hypo	7.26959e-08
1777	chr2	64578360	64578360	1	*	hypo	6.89088e-08
1779	chr2	64716698	64716698	1	*	hypo	5.18359e-10
1781	chr2	65262441	65262441	1	*	hyper	1.35669e-07
1784	chr2	71110511	71110511	1	*	hypo	8.51753e-08
1788	chr2	71153862	71153862	1	*	hypo	6.0426e-07
1793	chr2	75371755	75371755	1	*	hyper	6.07014e-07
1795	chr2	75971432	75971432	1	*	hyper	3.48933e-08
1798	chr2	76373843	76373843	1	*	hyper	4.77921e-08
1800	chr2	77086099	77086099	1	*	hypo	7.08149e-10
1803	chr2	77146738	77146738	1	*	hyper	2.55825e-08
1806	chr2	77397919	77397919	1	*	hypo	3.0245e-07
1808	chr2	78782499	78782499	1	*	hyper	7.48344e-07
1810	chr2	79021990	79021990	1	*	hyper	5.72614e-08
1812	chr2	79369147	79369147	1	*	hypo	2.75919e-07
1815	chr2	79426281	79426281	1	*	hypo	7.96768e-07
1818	chr2	79429990	79429990	1	*	hypo	2.20704e-07
1822	chr2	79544409	79544409	1	*	hypo	4.66508e-10
1826	chr2	80423811	80423811	1	*	hyper	1.77705e-10
1828	chr2	80729604	80729604	1	*	hyper	2.65495e-08
1832	chr2	83474310	83474310	1	*	hypo	2.55856e-09
1835	chr2	84530413	84530413	1	*	hyper	7.42647e-07
1840	chr2	85633357	85633357	1	*	hyper	1.66528e-06
1843	chr2	85739626	85739626	1	*	hypo	1.31922e-09
1845	chr2	85759356	85759356	1	*	hyper	1.05399e-09
1848	chr2	85797319	85797319	1	*	hyper	4.00984e-08
1851	chr2	87269076	87269076	1	*	hyper	4.24229e-08
1854	chr2	87417773	87417773	1	*	hypo	1.42506e-06
1856	chr2	87544744	87544744	1	*	hypo	1.16678e-06
1859	chr2	88216886	88216886	1	*	hypo	8.50366e-07
1861	chr2	88614074	88614074	1	*	hyper	1.05032e-06
1863	chr2	88746033	88746033	1	*	hypo	6.38325e-09
1865	chr2	89314986	89314986	1	*	hyper	1.3015e-08
1869	chr2	89678788	89678788	1	*	hyper	2.14492e-14
1872	chr2	89878165	89878165	1	*	hyper	3.44263e-10
1877	chr2	89882996	89882996	1	*	hyper	8.30113e-07
1882	chr2	89886360	89886360	1	*	hyper	3.19942e-09
1885	chr2	89889472	89889472	1	*	hyper	2.58745e-06
1888	chr2	89926499	89926499	1	*	hyper	2.75793e-10
1891	chr2	89934719	89934719	1	*	hyper	1.23785e-10
1894	chr2	89995086	89995086	1	*	hyper	8.98052e-08
1899	chr2	90061334	90061334	1	*	hyper	2.99522e-09
1904	chr2	90487113	90487113	1	*	hypo	1.72778e-06
1907	chr2	90488615	90488615	1	*	hypo	4.64572e-11
1909	chr2	91310972	91310972	1	*	hypo	9.50593e-09
1912	chr2	91571912	91571912	1	*	hyper	2.45105e-06
1917	chr2	91667055	91667055	1	*	hypo	8.12509e-07
1920	chr2	91715610	91715610	1	*	hyper	2.8364e-08
1922	chr2	92008529	92008529	1	*	hypo	2.96792e-06
1925	chr2	92013373	92013373	1	*	hypo	3.71259e-12
1928	chr2	92238234	92238234	1	*	hyper	1.86504e-06
1931	chr2	92679051	92679051	1	*	hypo	6.84036e-08
1933	chr2	92756275	92756275	1	*	hyper	1.65222e-07
1935	chr2	93400762	93400762	1	*	hypo	1.69632e-06
1938	chr2	93524114	93524114	1	*	hyper	1.69651e-08
1941	chr2	93529123	93529123	1	*	hyper	2.66426e-12
1943	chr2	93700323	93700323	1	*	hyper	1.53202e-08
1946	chr2	94102204	94102204	1	*	hypo	2.16933e-10
1950	chr2	94855315	94855315	1	*	hyper	9.18044e-08
1954	chr2	96394279	96394279	1	*	hypo	2.19836e-06
1958	chr2	96454296	96454296	1	*	hyper	9.50469e-07
1963	chr2	97835399	97835399	1	*	hyper	1.71168e-06
1968	chr2	98226282	98226282	1	*	hypo	3.17925e-09
1972	chr2	101175312	101175312	1	*	hyper	2.41528e-06
1975	chr2	104786077	104786077	1	*	hyper	2.84098e-07
1978	chr2	107755466	107755466	1	*	hypo	1.15497e-09
1980	chr2	108062427	108062427	1	*	hypo	3.68606e-06
1982	chr2	109386820	109386820	1	*	hypo	3.98856e-06
1984	chr2	113036627	113036627	1	*	hypo	9.97664e-07
1989	chr2	113257975	113257975	1	*	hyper	9.87067e-07
1991	chr2	113733447	113733447	1	*	hyper	6.37274e-08
1993	chr2	115802791	115802791	1	*	hypo	6.71134e-11
1995	chr2	116775777	116775777	1	*	hyper	2.14115e-06
1997	chr2	117043402	117043402	1	*	hyper	1.12706e-07
2001	chr2	117734464	117734464	1	*	hyper	1.43292e-06
2003	chr2	118140361	118140361	1	*	hyper	5.73972e-11
2006	chr2	118156170	118156170	1	*	hyper	1.73521e-10
2008	chr2	118240233	118240233	1	*	hyper	9.91136e-13
2011	chr2	118379588	118379588	1	*	hyper	4.1732e-07
2016	chr2	118414336	118414336	1	*	hypo	7.02355e-09
2019	chr2	118560059	118560059	1	*	hyper	6.60148e-07
2024	chr2	118598537	118598537	1	*	hypo	1.7098e-06
2029	chr2	118608297	118608297	1	*	hyper	3.414e-08
2033	chr2	118665837	118665837	1	*	hyper	2.75314e-06
2036	chr2	118693458	118693458	1	*	hyper	2.41917e-06
2038	chr2	118875124	118875124	1	*	hyper	3.42193e-06
2043	chr2	118975143	118975143	1	*	hyper	2.26196e-06
2047	chr2	119134549	119134549	1	*	hyper	3.13201e-09
2049	chr2	120049304	120049304	1	*	hyper	1.23892e-10
2052	chr2	120895683	120895683	1	*	hypo	1.53001e-06
2055	chr2	120982664	120982664	1	*	hypo	4.85774e-10
2059	chr2	121099904	121099904	1	*	hypo	8.5122e-08
2062	chr2	121154753	121154753	1	*	hyper	3.41284e-07
2064	chr2	121409749	121409749	1	*	hyper	5.96142e-08
2068	chr2	121481109	121481109	1	*	hyper	1.2978e-07
2071	chr2	121489661	121489661	1	*	hyper	1.19836e-07
2073	chr2	121678228	121678228	1	*	hyper	5.13371e-10
2075	chr2	122340246	122340246	1	*	hyper	1.15598e-06
2080	chr2	122462135	122462135	1	*	hyper	4.23999e-06
2083	chr2	122758073	122758073	1	*	hyper	1.9658e-11
2086	chr2	122758671	122758671	1	*	hyper	1.94586e-08
2088	chr2	122761416	122761416	1	*	hyper	2.57388e-06
2091	chr2	122801902	122801902	1	*	hyper	3.54822e-07
2093	chr2	122943610	122943610	1	*	hypo	8.96708e-07
2096	chr2	122944598	122944598	1	*	hyper	4.5933e-09
2099	chr2	123010123	123010123	1	*	hyper	4.18212e-06
2101	chr2	123071713	123071713	1	*	hyper	3.80662e-06
2103	chr2	123117907	123117907	1	*	hyper	3.6398e-06
2106	chr2	123999055	123999055	1	*	hypo	6.38658e-10
2109	chr2	124164200	124164200	1	*	hyper	2.57388e-06
2111	chr2	124229429	124229429	1	*	hyper	4.23339e-09
2114	chr2	124277609	124277609	1	*	hyper	1.18691e-12
2118	chr2	125035087	125035087	1	*	hypo	2.30004e-08
2121	chr2	125091054	125091054	1	*	hypo	1.64132e-10
2124	chr2	125226605	125226605	1	*	hyper	2.2588e-06
2129	chr2	125239717	125239717	1	*	hyper	1.45017e-07
2132	chr2	125253914	125253914	1	*	hyper	1.15486e-06
2134	chr2	125401764	125401764	1	*	hyper	1.6458e-06
2139	chr2	125403378	125403378	1	*	hypo	2.4976e-06
2144	chr2	126087275	126087275	1	*	hyper	7.81593e-12
2147	chr2	126099335	126099335	1	*	hyper	2.53395e-09
2151	chr2	126123924	126123924	1	*	hyper	2.63982e-06
2155	chr2	126188489	126188489	1	*	hyper	1.58381e-10
2158	chr2	126219784	126219784	1	*	hyper	3.96737e-08
2163	chr2	126381789	126381789	1	*	hyper	3.15388e-06
2166	chr2	126738028	126738028	1	*	hyper	1.55695e-06
2168	chr2	127212353	127212353	1	*	hypo	2.09949e-06
2170	chr2	127240224	127240224	1	*	hypo	1.97608e-06
2175	chr2	127276545	127276545	1	*	hyper	2.63406e-11
2177	chr2	127308446	127308446	1	*	hyper	9.11333e-07
2179	chr2	127477998	127477998	1	*	hyper	1.43901e-09
2181	chr2	127637430	127637430	1	*	hyper	5.14359e-11
2186	chr2	127780717	127780717	1	*	hyper	8.05899e-10
2188	chr2	127847367	127847367	1	*	hyper	2.25072e-07
2190	chr2	128439729	128439729	1	*	hypo	2.74533e-06
2193	chr2	128646088	128646088	1	*	hyper	2.97007e-06
2196	chr2	128873260	128873260	1	*	hyper	1.64025e-06
2198	chr2	130022368	130022368	1	*	hyper	1.03418e-07
2203	chr2	130023357	130023357	1	*	hyper	5.26542e-06
2208	chr2	130023817	130023817	1	*	hyper	1.15001e-08
2212	chr2	130810549	130810549	1	*	hypo	2.48492e-10
2215	chr2	130842766	130842766	1	*	hypo	3.24918e-10
2218	chr2	130872773	130872773	1	*	hypo	1.04366e-08
2221	chr2	130878687	130878687	1	*	hypo	7.56317e-06
2224	chr2	130880290	130880290	1	*	hypo	1.19393e-08
2226	chr2	130880683	130880683	1	*	hypo	6.33791e-08
2228	chr2	130884254	130884254	1	*	hypo	7.0984e-08
2231	chr2	131144190	131144190	1	*	hyper	6.25575e-07
2235	chr2	131359940	131359940	1	*	hyper	1.7983e-09
2237	chr2	131368978	131368978	1	*	hyper	5.74291e-07
2240	chr2	131684468	131684468	1	*	hypo	3.4643e-08
2242	chr2	131730512	131730512	1	*	hypo	4.00161e-08
2245	chr2	131807097	131807097	1	*	hypo	5.62801e-07
2248	chr2	131807974	131807974	1	*	hypo	5.45191e-09
2251	chr2	131974963	131974963	1	*	hyper	5.44386e-06
2255	chr2	132288677	132288677	1	*	hyper	3.39965e-10
2258	chr2	132403697	132403697	1	*	hyper	7.03441e-07
2260	chr2	132455434	132455434	1	*	hypo	2.60824e-06
2262	chr2	132646881	132646881	1	*	hyper	2.42688e-06
2267	chr2	132725468	132725468	1	*	hyper	5.64684e-06
2270	chr2	132738377	132738377	1	*	hyper	4.31989e-11
2272	chr2	132838078	132838078	1	*	hyper	3.57663e-08
2275	chr2	132950612	132950612	1	*	hyper	5.98558e-07
2277	chr2	132992775	132992775	1	*	hyper	5.29387e-06
2280	chr2	133003921	133003921	1	*	hypo	8.86447e-08
2282	chr2	133006460	133006460	1	*	hypo	3.30294e-07
2284	chr2	133138163	133138163	1	*	hypo	1.04819e-06
2287	chr2	133312373	133312373	1	*	hyper	7.38858e-07
2291	chr2	133358417	133358417	1	*	hyper	3.53643e-06
2296	chr2	133358431	133358431	1	*	hyper	4.49923e-06
2301	chr2	133464631	133464631	1	*	hyper	4.91715e-07
2306	chr2	133635358	133635358	1	*	hyper	3.33886e-07
2309	chr2	134235243	134235243	1	*	hypo	1.25166e-06
2312	chr2	134302543	134302543	1	*	hypo	4.16932e-07
2314	chr2	134350323	134350323	1	*	hyper	6.84571e-06
2317	chr2	134441332	134441332	1	*	hyper	1.48578e-06
2319	chr2	134469133	134469133	1	*	hypo	6.84571e-06
2322	chr2	134789563	134789563	1	*	hyper	4.01678e-07
2324	chr2	134794035	134794035	1	*	hyper	2.55622e-06
2327	chr2	134802672	134802672	1	*	hyper	1.77444e-06
2329	chr2	134909005	134909005	1	*	hypo	4.61913e-06
2331	chr2	134970886	134970886	1	*	hypo	2.60028e-07
2333	chr2	135011010	135011010	1	*	hyper	2.03507e-06
2338	chr2	135013394	135013394	1	*	hyper	2.37941e-08
2342	chr2	135099134	135099134	1	*	hyper	3.63677e-07
2346	chr2	135099361	135099361	1	*	hyper	6.3978e-08
2351	chr2	135117640	135117640	1	*	hyper	1.46434e-07
2355	chr2	135394495	135394495	1	*	hypo	2.79198e-06
2358	chr2	135416768	135416768	1	*	hypo	7.41076e-09
2361	chr2	135634387	135634387	1	*	hypo	5.31886e-07
2363	chr2	135657624	135657624	1	*	hypo	4.74987e-06
2365	chr2	136127870	136127870	1	*	hyper	3.10412e-06
2368	chr3	747576	747576	1	*	hyper	4.79868e-08
2373	chr3	860126	860126	1	*	hypo	2.14008e-08
2376	chr3	860617	860617	1	*	hypo	2.21167e-06
2378	chr3	952131	952131	1	*	hypo	8.00702e-08
2382	chr3	954576	954576	1	*	hypo	6.37327e-10
2386	chr3	1156892	1156892	1	*	hyper	4.17038e-10
2390	chr3	1199083	1199083	1	*	hyper	7.03849e-09
2394	chr3	1243478	1243478	1	*	hypo	3.25635e-09
2399	chr3	1253745	1253745	1	*	hypo	6.52657e-07
2404	chr3	2703557	2703557	1	*	hypo	1.03507e-06
2406	chr3	3286256	3286256	1	*	hypo	2.74206e-06
2410	chr3	3789197	3789197	1	*	hyper	5.4173e-06
2414	chr3	4090578	4090578	1	*	hypo	5.23397e-06
2416	chr3	4098908	4098908	1	*	hyper	2.76673e-06
2419	chr3	4256558	4256558	1	*	hypo	6.41995e-06
2423	chr3	5650943	5650943	1	*	hyper	4.35895e-06
2426	chr3	6751625	6751625	1	*	hyper	1.64921e-07
2430	chr3	7110042	7110042	1	*	hyper	6.14206e-06
2433	chr3	7227072	7227072	1	*	hyper	3.01878e-07
2437	chr3	7234357	7234357	1	*	hyper	6.71434e-06
2441	chr3	7314056	7314056	1	*	hypo	3.75623e-07
2445	chr3	7360213	7360213	1	*	hyper	1.07752e-06
2450	chr3	7417179	7417179	1	*	hyper	9.61521e-07
2454	chr3	7424333	7424333	1	*	hyper	8.18794e-14
2458	chr3	7551036	7551036	1	*	hypo	2.46085e-06
2462	chr3	7602832	7602832	1	*	hypo	4.44668e-07
2464	chr3	7790348	7790348	1	*	hyper	8.26888e-11
2466	chr3	7822970	7822970	1	*	hyper	2.51927e-07
2469	chr3	7826053	7826053	1	*	hyper	1.49441e-09
2472	chr3	7830657	7830657	1	*	hyper	5.51888e-07
2474	chr3	7871979	7871979	1	*	hyper	3.03111e-08
2476	chr3	7906942	7906942	1	*	hypo	4.35895e-06
2479	chr3	7911925	7911925	1	*	hypo	6.72938e-06
2481	chr3	8041843	8041843	1	*	hypo	4.16932e-07
2485	chr3	8388304	8388304	1	*	hypo	6.82671e-06
2491	chr3	8396501	8396501	1	*	hypo	6.56914e-07
2493	chr3	9353503	9353503	1	*	hypo	1.22263e-06
2498	chr3	9936863	9936863	1	*	hypo	6.99212e-07
2501	chr3	10575129	10575129	1	*	hyper	1.81443e-07
2503	chr3	10720649	10720649	1	*	hypo	3.10035e-08
2505	chr3	10837883	10837883	1	*	hypo	5.90853e-07
2508	chr3	10888008	10888008	1	*	hypo	6.27871e-07
2510	chr3	12442948	12442948	1	*	hyper	6.42824e-06
2512	chr3	12488079	12488079	1	*	hyper	5.16925e-06
2515	chr3	12562711	12562711	1	*	hyper	5.51486e-07
2517	chr3	12729971	12729971	1	*	hypo	2.55628e-07
2520	chr3	12782298	12782298	1	*	hyper	5.39756e-06
2522	chr3	12871135	12871135	1	*	hypo	3.65679e-07
2525	chr3	12871275	12871275	1	*	hypo	7.61327e-07
2527	chr3	12924826	12924826	1	*	hypo	1.5755e-11
2530	chr3	12932080	12932080	1	*	hypo	1.54057e-07
2533	chr3	13001703	13001703	1	*	hypo	1.40093e-09
2536	chr3	13039691	13039691	1	*	hypo	5.89077e-06
2538	chr3	13260839	13260839	1	*	hyper	3.2142e-08
2541	chr3	13541851	13541851	1	*	hypo	1.53167e-06
2544	chr3	13811378	13811378	1	*	hyper	3.23451e-06
2546	chr3	13914733	13914733	1	*	hyper	6.00762e-08
2548	chr3	14078260	14078260	1	*	hypo	1.49499e-06
2551	chr3	14201745	14201745	1	*	hyper	4.39074e-06
2553	chr3	14234281	14234281	1	*	hyper	1.99345e-09
2558	chr3	14726592	14726592	1	*	hyper	1.41829e-07
2560	chr3	14983161	14983161	1	*	hypo	7.04895e-07
2564	chr3	15002282	15002282	1	*	hypo	1.08372e-07
2568	chr3	15194158	15194158	1	*	hypo	1.12003e-08
2573	chr3	15393643	15393643	1	*	hyper	1.8517e-07
2578	chr3	15558679	15558679	1	*	hypo	8.4485e-07
2582	chr3	15782664	15782664	1	*	hypo	3.16397e-07
2584	chr3	15978225	15978225	1	*	hypo	3.11422e-06
2586	chr3	16182720	16182720	1	*	hyper	1.46334e-06
2589	chr3	16435939	16435939	1	*	hyper	3.58632e-06
2592	chr3	16444246	16444246	1	*	hyper	2.61099e-08
2596	chr3	16496337	16496337	1	*	hyper	2.1215e-07
2598	chr3	17049821	17049821	1	*	hyper	8.09352e-10
2601	chr3	17272405	17272405	1	*	hypo	1.60086e-09
2604	chr3	18268084	18268084	1	*	hypo	2.93745e-07
2607	chr3	18353586	18353586	1	*	hypo	5.68781e-07
2610	chr3	18478889	18478889	1	*	hyper	1.08709e-06
2613	chr3	18918120	18918120	1	*	hypo	6.58248e-07
2616	chr3	19156175	19156175	1	*	hyper	6.10598e-08
2621	chr3	19182973	19182973	1	*	hyper	2.02285e-07
2624	chr3	19194180	19194180	1	*	hyper	1.68167e-10
2626	chr3	19227003	19227003	1	*	hyper	9.75785e-07
2631	chr3	19375691	19375691	1	*	hyper	2.17216e-06
2633	chr3	19888135	19888135	1	*	hyper	1.17202e-06
2637	chr3	20457660	20457660	1	*	hypo	3.89636e-09
2639	chr3	20656876	20656876	1	*	hypo	7.61955e-09
2644	chr3	20933978	20933978	1	*	hypo	2.37748e-07
2646	chr3	20944642	20944642	1	*	hypo	3.4895e-08
2648	chr3	21083287	21083287	1	*	hyper	8.75848e-07
2650	chr3	21527344	21527344	1	*	hyper	3.35602e-06
2655	chr3	22695660	22695660	1	*	hyper	1.2794e-08
2657	chr3	22777279	22777279	1	*	hyper	2.02712e-13
2660	chr3	22779790	22779790	1	*	hyper	3.91718e-09
2662	chr3	22780496	22780496	1	*	hyper	5.43314e-09
2664	chr3	22787106	22787106	1	*	hyper	2.58293e-08
2666	chr3	22789901	22789901	1	*	hyper	6.09074e-11
2668	chr3	23243083	23243083	1	*	hypo	3.27356e-08
2670	chr3	23363830	23363830	1	*	hypo	1.85316e-07
2673	chr3	23552712	23552712	1	*	hyper	8.08864e-07
2678	chr3	23648154	23648154	1	*	hypo	4.43005e-06
2680	chr3	24178551	24178551	1	*	hypo	2.61411e-08
2684	chr3	25270848	25270848	1	*	hypo	1.02834e-06
2689	chr3	25274676	25274676	1	*	hypo	2.11098e-07
2693	chr3	25496082	25496082	1	*	hypo	3.45376e-06
2696	chr3	25508796	25508796	1	*	hyper	2.78859e-09
2699	chr3	25913301	25913301	1	*	hypo	6.70754e-09
2701	chr3	25944774	25944774	1	*	hypo	6.47498e-09
2704	chr3	27127088	27127088	1	*	hypo	7.38464e-07
2707	chr3	29353504	29353504	1	*	hypo	8.42731e-10
2710	chr3	29529640	29529640	1	*	hypo	3.59694e-10
2715	chr3	29989877	29989877	1	*	hypo	4.60783e-08
2718	chr3	30935194	30935194	1	*	hypo	5.01059e-07
2721	chr3	30962125	30962125	1	*	hypo	3.15005e-06
2724	chr3	30966287	30966287	1	*	hypo	5.28597e-07
2726	chr3	31574574	31574574	1	*	hyper	4.4494e-06
2730	chr3	33359730	33359730	1	*	hypo	3.17548e-06
2734	chr3	33587636	33587636	1	*	hypo	1.67791e-06
2737	chr3	33624657	33624657	1	*	hypo	5.14317e-07
2739	chr3	34044277	34044277	1	*	hyper	9.74015e-08
2742	chr3	34108506	34108506	1	*	hyper	1.91408e-11
2746	chr3	34108637	34108637	1	*	hyper	8.18265e-08
2751	chr3	34288342	34288342	1	*	hyper	1.40757e-07
2756	chr3	34338437	34338437	1	*	hypo	2.20814e-09
2759	chr3	34339154	34339154	1	*	hyper	1.33207e-12
2762	chr3	34431289	34431289	1	*	hyper	1.02739e-08
2766	chr3	35060854	35060854	1	*	hypo	2.31577e-06
2770	chr3	35074464	35074464	1	*	hypo	1.69364e-07
2774	chr3	35157920	35157920	1	*	hypo	5.40763e-08
2777	chr3	35217542	35217542	1	*	hypo	1.84459e-06
2780	chr3	35334209	35334209	1	*	hypo	8.65459e-09
2782	chr3	35801569	35801569	1	*	hypo	1.35681e-07
2784	chr3	35834846	35834846	1	*	hypo	3.57029e-06
2786	chr3	35848183	35848183	1	*	hypo	3.29215e-06
2788	chr3	35849579	35849579	1	*	hypo	1.65385e-08
2790	chr3	36213834	36213834	1	*	hypo	1.52364e-11
2794	chr3	36405864	36405864	1	*	hypo	4.47917e-06
2797	chr3	36472898	36472898	1	*	hypo	9.88312e-08
2800	chr3	36519313	36519313	1	*	hyper	5.68989e-08
2803	chr3	36577544	36577544	1	*	hypo	1.71317e-07
2806	chr3	37015565	37015565	1	*	hyper	3.85561e-06
2809	chr3	37610625	37610625	1	*	hypo	3.0449e-09
2812	chr3	37643488	37643488	1	*	hypo	5.94648e-16
2815	chr3	37659822	37659822	1	*	hypo	2.61864e-07
2817	chr3	42392193	42392193	1	*	hypo	5.77398e-08
2821	chr3	49728211	49728211	1	*	hypo	1.48241e-08
2826	chr3	49739492	49739492	1	*	hypo	2.77427e-07
2831	chr3	51584074	51584074	1	*	hyper	3.31528e-07
2834	chr3	52373946	52373946	1	*	hypo	3.25369e-07
2837	chr3	53534311	53534311	1	*	hyper	7.57523e-08
2840	chr3	53827794	53827794	1	*	hypo	3.7819e-09
2842	chr3	55192077	55192077	1	*	hypo	1.72917e-09
2847	chr3	68875452	68875452	1	*	hypo	2.13812e-06
2849	chr3	73111115	73111115	1	*	hypo	1.23509e-14
2854	chr3	74636536	74636536	1	*	hypo	1.3917e-09
2857	chr3	75878733	75878733	1	*	hypo	7.06783e-09
2859	chr3	76503997	76503997	1	*	hyper	7.39626e-09
2862	chr3	76507667	76507667	1	*	hyper	1.39854e-08
2865	chr3	76804092	76804092	1	*	hypo	8.76391e-08
2867	chr3	76852129	76852129	1	*	hyper	3.34381e-07
2871	chr3	76980707	76980707	1	*	hypo	1.62059e-07
2874	chr3	77147373	77147373	1	*	hyper	8.67569e-07
2879	chr3	77855082	77855082	1	*	hyper	3.4732e-07
2882	chr3	77863293	77863293	1	*	hyper	1.38778e-06
2884	chr3	78204281	78204281	1	*	hypo	1.48958e-10
2889	chr3	78347510	78347510	1	*	hypo	3.92925e-08
2893	chr3	78515728	78515728	1	*	hypo	6.61731e-08
2896	chr3	79852144	79852144	1	*	hypo	9.8505e-09
2899	chr3	80092499	80092499	1	*	hyper	2.00012e-10
2902	chr3	80096271	80096271	1	*	hyper	2.51496e-10
2904	chr3	80253315	80253315	1	*	hyper	1.2838e-06
2908	chr3	80703172	80703172	1	*	hypo	1.86986e-06
2911	chr3	80873863	80873863	1	*	hypo	2.50651e-06
2913	chr3	81070710	81070710	1	*	hyper	1.33188e-06
2915	chr3	81105626	81105626	1	*	hyper	1.60766e-06
2918	chr3	81156670	81156670	1	*	hypo	2.53015e-08
2921	chr3	81224091	81224091	1	*	hypo	2.37221e-11
2923	chr3	81234821	81234821	1	*	hyper	1.28256e-06
2926	chr3	81438152	81438152	1	*	hypo	1.53298e-10
2929	chr3	85766065	85766065	1	*	hyper	1.2303e-08
2934	chr3	86054956	86054956	1	*	hypo	7.79983e-08
2937	chr3	86836927	86836927	1	*	hypo	1.4599e-08
2940	chr3	87027985	87027985	1	*	hyper	2.46597e-06
2943	chr3	87034063	87034063	1	*	hyper	9.98337e-08
2946	chr3	88121588	88121588	1	*	hyper	2.49863e-06
2948	chr3	91015595	91015595	1	*	hyper	4.90557e-07
2950	chr3	92418181	92418181	1	*	hyper	2.6578e-11
2952	chr3	92425785	92425785	1	*	hyper	2.87363e-07
2955	chr3	92458906	92458906	1	*	hypo	7.8761e-08
2958	chr3	92463060	92463060	1	*	hyper	8.25451e-10
2961	chr3	93069528	93069528	1	*	hypo	5.93574e-10
2965	chr3	94191966	94191966	1	*	hyper	1.9475e-06
2967	chr3	94600283	94600283	1	*	hyper	3.69801e-07
2972	chr3	94804939	94804939	1	*	hypo	4.15358e-06
2977	chr3	94850618	94850618	1	*	hyper	1.45182e-06
2982	chr3	95005037	95005037	1	*	hyper	6.37279e-08
2984	chr3	95192295	95192295	1	*	hyper	1.64071e-07
2987	chr3	95372447	95372447	1	*	hypo	1.74896e-06
2992	chr3	95409668	95409668	1	*	hypo	3.87831e-10
2996	chr3	96635442	96635442	1	*	hypo	7.79836e-07
2999	chr3	96653487	96653487	1	*	hypo	2.9997e-08
3002	chr3	96654088	96654088	1	*	hypo	1.20832e-06
3005	chr3	96742080	96742080	1	*	hypo	3.36207e-06
3007	chr3	96906227	96906227	1	*	hyper	1.70051e-10
3010	chr3	96942297	96942297	1	*	hypo	1.92471e-06
3013	chr3	96944249	96944249	1	*	hyper	5.31699e-10
3016	chr3	97704603	97704603	1	*	hypo	1.54907e-08
3018	chr3	97772289	97772289	1	*	hyper	1.31833e-07
3021	chr3	98307218	98307218	1	*	hypo	1.09714e-07
3023	chr3	98989733	98989733	1	*	hyper	2.05762e-07
3028	chr3	99038742	99038742	1	*	hyper	7.0641e-09
3031	chr3	99226727	99226727	1	*	hyper	1.5757e-08
3034	chr3	99536899	99536899	1	*	hypo	5.31927e-11
3039	chr3	100235338	100235338	1	*	hypo	3.50474e-07
3041	chr3	100275090	100275090	1	*	hypo	4.13184e-06
3044	chr3	100814213	100814213	1	*	hyper	5.2561e-08
3047	chr3	101072680	101072680	1	*	hypo	1.70135e-09
3052	chr3	101399736	101399736	1	*	hyper	3.62561e-08
3056	chr3	101553633	101553633	1	*	hypo	8.88266e-07
3060	chr3	101561938	101561938	1	*	hypo	8.61978e-09
3064	chr3	101646977	101646977	1	*	hyper	2.68316e-07
3068	chr3	102014892	102014892	1	*	hyper	3.45376e-06
3071	chr3	102107746	102107746	1	*	hyper	2.67754e-06
3076	chr3	102717592	102717592	1	*	hypo	2.95415e-07
3079	chr3	102760045	102760045	1	*	hyper	3.42283e-10
3081	chr3	102962156	102962156	1	*	hypo	1.75992e-08
3083	chr3	103133650	103133650	1	*	hyper	9.36e-08
3086	chr3	103173378	103173378	1	*	hypo	1.72141e-07
3089	chr3	103200293	103200293	1	*	hyper	1.2029e-08
3091	chr3	103506992	103506992	1	*	hypo	7.44948e-07
3093	chr3	104232094	104232094	1	*	hypo	3.46642e-07
3096	chr3	104387932	104387932	1	*	hypo	1.74873e-07
3099	chr3	104410742	104410742	1	*	hypo	3.45612e-06
3102	chr3	104418369	104418369	1	*	hypo	3.51846e-09
3104	chr3	104535134	104535134	1	*	hyper	3.1002e-06
3106	chr3	105193576	105193576	1	*	hyper	5.83996e-10
3108	chr3	105253557	105253557	1	*	hypo	5.31886e-07
3111	chr3	105742060	105742060	1	*	hyper	2.59246e-09
3115	chr3	106024414	106024414	1	*	hypo	6.78185e-10
3119	chr3	106024423	106024423	1	*	hypo	2.4886e-08
3123	chr3	106388809	106388809	1	*	hyper	1.96168e-07
3127	chr3	106542960	106542960	1	*	hypo	1.85598e-08
3130	chr3	106557541	106557541	1	*	hyper	1.94198e-06
3134	chr3	106794962	106794962	1	*	hyper	5.04985e-07
3139	chr3	106830860	106830860	1	*	hypo	8.45519e-07
3143	chr3	107070099	107070099	1	*	hypo	2.91228e-09
3148	chr3	107080130	107080130	1	*	hypo	4.18242e-06
3153	chr3	107178289	107178289	1	*	hyper	5.73472e-08
3155	chr3	107483160	107483160	1	*	hyper	4.70829e-08
3158	chr3	107564995	107564995	1	*	hyper	2.07376e-06
3161	chr3	107746556	107746556	1	*	hyper	3.43477e-06
3164	chr3	107868479	107868479	1	*	hypo	1.87655e-07
3167	chr3	107897237	107897237	1	*	hyper	1.38495e-09
3170	chr3	110053528	110053528	1	*	hyper	2.13427e-07
3172	chr3	111138524	111138524	1	*	hyper	4.41567e-06
3174	chr3	111470290	111470290	1	*	hyper	4.25187e-06
3178	chr3	111904406	111904406	1	*	hypo	7.11915e-07
3181	chr3	112749992	112749992	1	*	hyper	1.40995e-06
3184	chr3	112783076	112783076	1	*	hyper	1.76626e-10
3187	chr3	112896090	112896090	1	*	hypo	1.45905e-06
3192	chr3	113246705	113246705	1	*	hypo	6.42444e-08
3194	chr3	113445743	113445743	1	*	hypo	3.20267e-07
3196	chr3	113495468	113495468	1	*	hyper	1.10016e-06
3198	chr3	114207391	114207391	1	*	hyper	2.15274e-06
3200	chr3	114505228	114505228	1	*	hypo	2.86079e-06
3202	chr3	114590536	114590536	1	*	hyper	5.33699e-08
3205	chr3	114709286	114709286	1	*	hypo	6.29093e-06
3208	chr3	114730002	114730002	1	*	hypo	4.56797e-11
3211	chr3	114731471	114731471	1	*	hypo	6.94081e-08
3213	chr3	114742387	114742387	1	*	hypo	5.59188e-10
3215	chr3	114821862	114821862	1	*	hypo	4.38601e-06
3217	chr3	115294371	115294371	1	*	hypo	4.94612e-06
3220	chr3	115363462	115363462	1	*	hypo	3.49921e-08
3223	chr3	116185778	116185778	1	*	hyper	1.60666e-06
3225	chr3	116198592	116198592	1	*	hypo	3.57463e-06
3227	chr3	116555034	116555034	1	*	hypo	1.62936e-08
3231	chr3	116625036	116625036	1	*	hyper	1.92236e-06
3233	chr3	116850752	116850752	1	*	hyper	5.564e-06
3235	chr3	116900655	116900655	1	*	hypo	1.70997e-06
3238	chr3	117856458	117856458	1	*	hypo	7.82747e-10
3241	chr3	118236592	118236592	1	*	hyper	3.98878e-06
3243	chr3	118647403	118647403	1	*	hyper	8.53001e-11
3246	chr3	118718273	118718273	1	*	hypo	5.101e-06
3248	chr3	119440371	119440371	1	*	hyper	2.35345e-06
3251	chr3	119461071	119461071	1	*	hypo	2.60122e-06
3253	chr3	119465768	119465768	1	*	hyper	1.20263e-07
3255	chr3	119467845	119467845	1	*	hyper	3.07468e-12
3257	chr3	119487504	119487504	1	*	hypo	1.49522e-07
3259	chr3	119552880	119552880	1	*	hypo	3.062e-06
3262	chr3	119686803	119686803	1	*	hyper	1.53219e-06
3264	chr3	119870856	119870856	1	*	hyper	1.79517e-06
3266	chr3	120242477	120242477	1	*	hypo	5.49035e-06
3268	chr3	120791498	120791498	1	*	hyper	3.57029e-06
3273	chr4	1048616	1048616	1	*	hypo	2.09053e-06
3276	chr4	1140700	1140700	1	*	hypo	5.29368e-07
3279	chr4	1194069	1194069	1	*	hyper	1.06367e-06
3282	chr4	3687202	3687202	1	*	hypo	7.09664e-07
3284	chr4	3716964	3716964	1	*	hypo	3.51803e-08
3287	chr4	3726316	3726316	1	*	hypo	3.86197e-06
3290	chr4	3834550	3834550	1	*	hypo	4.64592e-06
3292	chr4	4058466	4058466	1	*	hypo	1.82839e-07
3294	chr4	4643864	4643864	1	*	hyper	4.07905e-06
3296	chr4	5296141	5296141	1	*	hypo	1.41257e-06
3300	chr4	6040343	6040343	1	*	hyper	1.56167e-06
3303	chr4	6044941	6044941	1	*	hyper	3.02644e-07
3305	chr4	6059228	6059228	1	*	hyper	2.13812e-06
3307	chr4	6059475	6059475	1	*	hyper	2.91883e-08
3309	chr4	6202335	6202335	1	*	hypo	2.63867e-09
3311	chr4	6559395	6559395	1	*	hypo	4.52265e-06
3314	chr4	6603880	6603880	1	*	hyper	1.91687e-07
3317	chr4	6974125	6974125	1	*	hyper	2.98103e-06
3319	chr4	7065882	7065882	1	*	hypo	4.60263e-06
3322	chr4	7104518	7104518	1	*	hyper	2.98486e-06
3324	chr4	7142215	7142215	1	*	hyper	1.56658e-10
3326	chr4	7212015	7212015	1	*	hyper	1.24963e-07
3329	chr4	7242741	7242741	1	*	hypo	4.19771e-06
3331	chr4	7569503	7569503	1	*	hypo	3.23661e-06
3334	chr4	7614259	7614259	1	*	hyper	2.03507e-06
3336	chr4	7616118	7616118	1	*	hyper	5.4593e-08
3339	chr4	7656819	7656819	1	*	hyper	1.35622e-07
3342	chr4	7699933	7699933	1	*	hypo	7.35344e-10
3345	chr4	7740880	7740880	1	*	hyper	2.39962e-06
3350	chr4	7993072	7993072	1	*	hypo	6.82244e-07
3355	chr4	8014368	8014368	1	*	hypo	5.20544e-08
3360	chr4	8035345	8035345	1	*	hypo	3.75956e-09
3365	chr4	8287572	8287572	1	*	hyper	1.49485e-06
3370	chr4	8369267	8369267	1	*	hypo	2.27008e-06
3375	chr4	8910835	8910835	1	*	hypo	1.52892e-08
3377	chr4	9198061	9198061	1	*	hyper	9.14865e-07
3380	chr4	9199181	9199181	1	*	hyper	1.08294e-06
3383	chr4	9266965	9266965	1	*	hypo	1.19311e-06
3385	chr4	10014665	10014665	1	*	hyper	1.85444e-06
3390	chr4	10371270	10371270	1	*	hyper	4.37989e-06
3392	chr4	10388263	10388263	1	*	hypo	2.72144e-08
3394	chr4	10827076	10827076	1	*	hypo	3.89725e-08
3398	chr4	10950253	10950253	1	*	hypo	2.36266e-08
3400	chr4	11188563	11188563	1	*	hypo	3.10205e-06
3403	chr4	11747498	11747498	1	*	hypo	2.88157e-07
3405	chr4	13065507	13065507	1	*	hypo	2.06507e-06
3409	chr4	13092589	13092589	1	*	hypo	4.50113e-06
3414	chr4	13508375	13508375	1	*	hyper	3.66088e-06
3416	chr4	13661397	13661397	1	*	hypo	2.79446e-07
3418	chr4	14225714	14225714	1	*	hyper	2.13589e-06
3421	chr4	14308286	14308286	1	*	hyper	6.13707e-07
3423	chr4	14774003	14774003	1	*	hypo	1.87098e-06
3426	chr4	15347620	15347620	1	*	hypo	1.1276e-11
3428	chr4	15392789	15392789	1	*	hyper	4.7441e-07
3430	chr4	15421100	15421100	1	*	hyper	1.16883e-06
3433	chr4	15434064	15434064	1	*	hyper	7.16375e-10
3435	chr4	15587344	15587344	1	*	hyper	4.5175e-06
3437	chr4	15702370	15702370	1	*	hypo	4.64281e-07
3439	chr4	16172927	16172927	1	*	hyper	1.10539e-06
3442	chr4	16190304	16190304	1	*	hypo	2.26196e-06
3445	chr4	16249142	16249142	1	*	hypo	7.74716e-07
3449	chr4	16280507	16280507	1	*	hyper	3.29959e-09
3453	chr4	16601478	16601478	1	*	hyper	1.01575e-06
3457	chr4	17089709	17089709	1	*	hyper	5.88293e-07
3459	chr4	17455027	17455027	1	*	hyper	2.19399e-06
3462	chr4	17639561	17639561	1	*	hyper	3.16785e-09
3464	chr4	18512189	18512189	1	*	hyper	3.23822e-06
3467	chr4	18518363	18518363	1	*	hyper	1.33835e-07
3469	chr4	18536882	18536882	1	*	hyper	1.62593e-06
3471	chr4	18537766	18537766	1	*	hyper	4.77335e-06
3474	chr4	18613984	18613984	1	*	hyper	3.43725e-07
3477	chr4	18806251	18806251	1	*	hyper	2.04324e-07
3480	chr4	18901330	18901330	1	*	hypo	5.84025e-07
3483	chr4	21745591	21745591	1	*	hyper	2.04324e-07
3485	chr4	21746331	21746331	1	*	hyper	1.2675e-07
3487	chr4	23100003	23100003	1	*	hyper	4.80748e-07
3492	chr4	24202967	24202967	1	*	hypo	1.66272e-06
3495	chr4	24463217	24463217	1	*	hypo	2.61745e-09
3497	chr4	26064418	26064418	1	*	hypo	1.14295e-08
3499	chr4	26497438	26497438	1	*	hyper	1.49975e-07
3502	chr4	27645731	27645731	1	*	hypo	1.55498e-08
3504	chr4	27710677	27710677	1	*	hyper	3.32981e-10
3506	chr4	27912065	27912065	1	*	hypo	1.88707e-12
3509	chr4	28109082	28109082	1	*	hyper	1.08506e-07
3512	chr4	28254547	28254547	1	*	hypo	6.20063e-08
3514	chr4	30037691	30037691	1	*	hyper	3.65195e-09
3516	chr4	30046006	30046006	1	*	hyper	1.03418e-07
3518	chr4	30752465	30752465	1	*	hyper	1.57946e-07
3521	chr4	30791786	30791786	1	*	hypo	5.33456e-10
3523	chr4	30877747	30877747	1	*	hypo	4.6074e-07
3525	chr4	30883795	30883795	1	*	hypo	1.28206e-06
3528	chr4	30890400	30890400	1	*	hypo	6.27963e-13
3530	chr4	30892010	30892010	1	*	hyper	1.27476e-10
3533	chr4	30893145	30893145	1	*	hypo	1.5959e-13
3536	chr4	30899323	30899323	1	*	hypo	8.10828e-10
3538	chr4	31217683	31217683	1	*	hyper	1.45539e-06
3540	chr4	33977970	33977970	1	*	hyper	1.33494e-06
3543	chr4	36271950	36271950	1	*	hyper	2.66107e-09
3545	chr4	37356976	37356976	1	*	hypo	1.03145e-06
3548	chr4	39103851	39103851	1	*	hyper	7.94029e-08
3551	chr4	39191407	39191407	1	*	hyper	2.79602e-07
3554	chr4	40453848	40453848	1	*	hyper	1.27079e-06
3556	chr4	43910309	43910309	1	*	hypo	6.08682e-09
3560	chr4	46292918	46292918	1	*	hyper	4.96646e-07
3565	chr4	50830605	50830605	1	*	hyper	3.9403e-08
3569	chr4	55234460	55234460	1	*	hypo	3.85625e-07
3572	chr4	55663525	55663525	1	*	hyper	2.24838e-07
3574	chr4	60593025	60593025	1	*	hyper	3.17099e-08
3579	chr4	65901703	65901703	1	*	hypo	2.23056e-09
3583	chr4	67092127	67092127	1	*	hyper	2.22375e-08
3586	chr4	67279327	67279327	1	*	hypo	2.21348e-07
3588	chr4	68967623	68967623	1	*	hyper	3.35489e-07
3590	chr4	77454598	77454598	1	*	hyper	4.00049e-10
3594	chr4	78053807	78053807	1	*	hyper	2.71375e-06
3597	chr4	79002852	79002852	1	*	hyper	4.09734e-08
3600	chr4	81699809	81699809	1	*	hyper	6.63518e-08
3605	chr4	82002899	82002899	1	*	hyper	2.73249e-09
3609	chr4	82005569	82005569	1	*	hyper	3.79141e-10
3613	chr4	82112966	82112966	1	*	hyper	7.65278e-08
3617	chr4	84987293	84987293	1	*	hypo	1.24485e-06
3622	chr4	85117091	85117091	1	*	hypo	2.81118e-06
3626	chr4	85400981	85400981	1	*	hyper	1.00383e-06
3629	chr4	85626627	85626627	1	*	hyper	1.12483e-06
3631	chr4	87022897	87022897	1	*	hypo	2.65155e-06
3636	chr4	87500129	87500129	1	*	hyper	1.16174e-08
3640	chr4	87622826	87622826	1	*	hyper	9.12638e-07
3642	chr4	87896807	87896807	1	*	hyper	2.37775e-09
3644	chr4	88218358	88218358	1	*	hypo	1.61629e-06
3649	chr4	88580693	88580693	1	*	hypo	5.51725e-08
3652	chr4	88623085	88623085	1	*	hypo	6.57182e-07
3654	chr4	88627709	88627709	1	*	hypo	1.20263e-07
3657	chr4	88650506	88650506	1	*	hypo	6.36936e-13
3660	chr4	88652701	88652701	1	*	hypo	2.09867e-08
3662	chr4	88706427	88706427	1	*	hypo	2.21925e-07
3664	chr4	89398929	89398929	1	*	hypo	2.20506e-07
3666	chr4	91805101	91805101	1	*	hyper	1.37253e-08
3668	chr4	92441140	92441140	1	*	hypo	3.05751e-06
3673	chr4	93023358	93023358	1	*	hypo	1.303e-11
3676	chr4	93029607	93029607	1	*	hypo	2.93528e-11
3679	chr4	93045655	93045655	1	*	hyper	6.3463e-07
3682	chr4	93301327	93301327	1	*	hypo	1.66342e-16
3686	chr4	93319222	93319222	1	*	hypo	2.73761e-07
3690	chr4	93468629	93468629	1	*	hyper	6.20385e-07
3695	chr4	93496131	93496131	1	*	hypo	1.47056e-06
3700	chr4	93528585	93528585	1	*	hyper	1.04489e-11
3704	chr4	93598519	93598519	1	*	hypo	2.71052e-08
3706	chr4	93791944	93791944	1	*	hyper	1.11314e-06
3709	chr4	94611558	94611558	1	*	hyper	6.60032e-16
3711	chr4	94621787	94621787	1	*	hyper	4.75048e-11
3714	chr4	94698873	94698873	1	*	hyper	1.88226e-06
3716	chr4	94728852	94728852	1	*	hypo	2.24215e-14
3718	chr4	94737284	94737284	1	*	hypo	1.46618e-12
3721	chr4	94738228	94738228	1	*	hypo	6.275e-10
3723	chr4	95733674	95733674	1	*	hypo	3.41128e-09
3725	chr4	95888540	95888540	1	*	hypo	5.20709e-07
3729	chr4	95899114	95899114	1	*	hyper	3.51854e-07
3733	chr4	96380222	96380222	1	*	hyper	5.55084e-08
3736	chr4	96402357	96402357	1	*	hypo	6.8273e-09
3739	chr4	96405302	96405302	1	*	hypo	5.91388e-16
3742	chr4	96406178	96406178	1	*	hypo	9.12207e-12
3745	chr4	96432334	96432334	1	*	hypo	8.50986e-08
3747	chr4	96463476	96463476	1	*	hyper	1.69765e-11
3749	chr4	96480551	96480551	1	*	hyper	1.1219e-06
3753	chr4	96506647	96506647	1	*	hyper	1.26076e-08
3757	chr4	96508466	96508466	1	*	hyper	2.47148e-07
3762	chr4	96540347	96540347	1	*	hyper	9.62018e-11
3766	chr4	96548266	96548266	1	*	hyper	1.07998e-08
3770	chr4	96549152	96549152	1	*	hyper	6.08914e-08
3774	chr4	96666593	96666593	1	*	hyper	1.11484e-12
3778	chr4	96751014	96751014	1	*	hyper	1.04384e-11
3782	chr4	96763433	96763433	1	*	hyper	5.87181e-13
3785	chr4	96817150	96817150	1	*	hyper	1.71401e-15
3788	chr4	96818698	96818698	1	*	hyper	2.54565e-15
3791	chr4	96853401	96853401	1	*	hyper	3.01895e-10
3793	chr4	96912339	96912339	1	*	hyper	2.9913e-08
3795	chr4	96928600	96928600	1	*	hyper	1.78418e-11
3798	chr4	96930668	96930668	1	*	hyper	1.66925e-08
3801	chr4	96983698	96983698	1	*	hypo	4.77493e-07
3805	chr4	96984246	96984246	1	*	hypo	5.63569e-06
3809	chr4	96990747	96990747	1	*	hypo	3.12034e-06
3813	chr4	97342180	97342180	1	*	hypo	4.56643e-11
3817	chr4	97347638	97347638	1	*	hyper	1.15654e-07
3821	chr4	97396982	97396982	1	*	hyper	2.0889e-07
3826	chr4	97465547	97465547	1	*	hypo	2.82155e-06
3830	chr4	97481626	97481626	1	*	hypo	4.62828e-09
3835	chr4	97482061	97482061	1	*	hypo	2.37748e-07
3839	chr4	97510486	97510486	1	*	hypo	4.13937e-12
3844	chr4	97510988	97510988	1	*	hypo	1.08045e-10
3848	chr4	97666435	97666435	1	*	hypo	2.24741e-07
3852	chr4	97689473	97689473	1	*	hypo	5.91598e-06
3856	chr4	97692811	97692811	1	*	hyper	1.08634e-15
3861	chr4	97732280	97732280	1	*	hypo	6.22302e-06
3866	chr4	97840162	97840162	1	*	hyper	6.4114e-11
3870	chr4	97890432	97890432	1	*	hyper	5.93496e-12
3875	chr4	97890923	97890923	1	*	hyper	8.29698e-14
3880	chr4	97910288	97910288	1	*	hyper	1.8087e-12
3883	chr4	97952519	97952519	1	*	hypo	5.8305e-08
3888	chr4	97963078	97963078	1	*	hyper	3.75897e-06
3892	chr4	97970134	97970134	1	*	hyper	2.39603e-12
3897	chr4	98066259	98066259	1	*	hyper	1.0761e-10
3899	chr4	98081359	98081359	1	*	hypo	2.81118e-06
3901	chr4	98121120	98121120	1	*	hypo	7.94316e-07
3905	chr4	98129000	98129000	1	*	hypo	8.80944e-09
3909	chr4	98340030	98340030	1	*	hypo	2.33641e-07
3914	chr4	98340628	98340628	1	*	hypo	9.96363e-08
3918	chr4	98357825	98357825	1	*	hyper	1.2248e-07
3921	chr4	98424284	98424284	1	*	hyper	1.14827e-12
3923	chr4	98571190	98571190	1	*	hypo	3.28057e-06
3925	chr4	98602514	98602514	1	*	hyper	2.17704e-07
3929	chr4	98735966	98735966	1	*	hypo	5.03175e-12
3933	chr4	98845260	98845260	1	*	hyper	9.41501e-11
3937	chr4	99369952	99369952	1	*	hyper	1.46404e-09
3939	chr4	100553652	100553652	1	*	hyper	6.57617e-07
3941	chr4	101574937	101574937	1	*	hyper	1.40192e-06
3944	chr4	103364271	103364271	1	*	hyper	9.13718e-08
3949	chr4	104359314	104359314	1	*	hypo	6.01111e-06
3951	chr4	105179005	105179005	1	*	hypo	2.81087e-06
3954	chr4	105258355	105258355	1	*	hypo	1.34915e-07
3957	chr4	105287416	105287416	1	*	hypo	4.08282e-08
3960	chr4	105290876	105290876	1	*	hypo	1.13962e-07
3962	chr4	105636506	105636506	1	*	hyper	2.94922e-11
3964	chr4	105851911	105851911	1	*	hypo	4.2941e-06
3969	chr4	106009892	106009892	1	*	hypo	9.21392e-08
3974	chr4	106049871	106049871	1	*	hypo	6.5746e-07
3978	chr4	106218677	106218677	1	*	hyper	2.19915e-07
3981	chr4	106717059	106717059	1	*	hyper	6.4714e-08
3985	chr4	106860333	106860333	1	*	hyper	1.37377e-06
3988	chr4	106904862	106904862	1	*	hypo	6.58997e-06
3991	chr4	106912493	106912493	1	*	hypo	1.20182e-08
3993	chr4	106913516	106913516	1	*	hyper	2.33907e-06
3995	chr4	107626577	107626577	1	*	hyper	3.12833e-06
3999	chr4	107693761	107693761	1	*	hypo	7.61526e-07
4002	chr4	108222195	108222195	1	*	hypo	3.11529e-17
4004	chr4	108886965	108886965	1	*	hyper	3.71866e-06
4007	chr4	108907990	108907990	1	*	hyper	2.76311e-06
4010	chr4	108923958	108923958	1	*	hypo	2.25776e-10
4013	chr4	109445916	109445916	1	*	hypo	1.23823e-06
4015	chr4	110354762	110354762	1	*	hyper	3.78792e-08
4017	chr4	111159659	111159659	1	*	hypo	5.21281e-06
4019	chr4	111421829	111421829	1	*	hyper	1.12543e-06
4022	chr4	111660042	111660042	1	*	hyper	2.32245e-08
4025	chr4	111663868	111663868	1	*	hyper	1.36327e-09
4028	chr4	111828913	111828913	1	*	hypo	2.80509e-06
4031	chr4	111831003	111831003	1	*	hypo	1.20259e-06
4033	chr4	111892524	111892524	1	*	hypo	6.75511e-06
4036	chr4	111972680	111972680	1	*	hyper	3.83036e-06
4040	chr4	112150758	112150758	1	*	hyper	1.15377e-08
4042	chr4	112516992	112516992	1	*	hyper	6.56386e-06
4045	chr4	112544847	112544847	1	*	hyper	6.36889e-06
4048	chr4	113067691	113067691	1	*	hypo	6.00947e-08
4053	chr4	113070074	113070074	1	*	hypo	1.31577e-06
4057	chr4	113085776	113085776	1	*	hypo	5.813e-09
4060	chr4	113093192	113093192	1	*	hypo	1.98985e-07
4063	chr4	113711761	113711761	1	*	hyper	4.72043e-08
4065	chr4	113728137	113728137	1	*	hyper	1.95088e-08
4068	chr4	113728227	113728227	1	*	hyper	2.90214e-06
4071	chr4	113732824	113732824	1	*	hyper	9.8489e-07
4074	chr4	113733185	113733185	1	*	hyper	1.62142e-06
4077	chr4	113788821	113788821	1	*	hypo	4.07473e-06
4082	chr4	113862622	113862622	1	*	hyper	2.51248e-06
4085	chr4	113972023	113972023	1	*	hypo	2.04971e-06
4088	chr4	114001290	114001290	1	*	hypo	3.00862e-06
4091	chr4	114129026	114129026	1	*	hyper	1.07967e-09
4094	chr4	114131258	114131258	1	*	hyper	2.40871e-15
4097	chr4	114132423	114132423	1	*	hyper	1.48079e-06
4099	chr4	114134326	114134326	1	*	hyper	1.11314e-06
4102	chr4	114382553	114382553	1	*	hypo	5.5382e-07
4104	chr4	114459476	114459476	1	*	hyper	9.36242e-09
4106	chr4	114459945	114459945	1	*	hyper	2.06106e-07
4109	chr4	114504890	114504890	1	*	hypo	1.53666e-10
4114	chr4	114606328	114606328	1	*	hypo	2.21348e-07
4116	chr4	114660696	114660696	1	*	hypo	2.35908e-07
4118	chr4	114688762	114688762	1	*	hypo	4.89421e-12
4120	chr4	114689704	114689704	1	*	hypo	2.22819e-13
4122	chr4	114690369	114690369	1	*	hypo	7.932e-14
4124	chr4	114712222	114712222	1	*	hypo	1.62351e-07
4126	chr4	114751791	114751791	1	*	hyper	4.98769e-13
4129	chr4	114955409	114955409	1	*	hypo	3.82735e-09
4131	chr4	114990153	114990153	1	*	hyper	3.56826e-09
4134	chr4	115208390	115208390	1	*	hypo	2.49409e-07
4137	chr4	115212584	115212584	1	*	hypo	2.30671e-06
4139	chr4	115213516	115213516	1	*	hypo	5.3854e-07
4141	chr4	115213537	115213537	1	*	hypo	2.79488e-06
4143	chr4	115411567	115411567	1	*	hypo	3.63291e-06
4145	chr4	116038688	116038688	1	*	hypo	5.71387e-06
4148	chr4	116161731	116161731	1	*	hypo	1.2394e-12
4153	chr4	116717242	116717242	1	*	hypo	5.24514e-06
4158	chr4	117202721	117202721	1	*	hypo	1.1277e-06
4160	chr4	118494588	118494588	1	*	hypo	1.79554e-06
4164	chr4	118610709	118610709	1	*	hyper	3.56802e-07
4167	chr4	118706706	118706706	1	*	hypo	1.12964e-06
4169	chr4	118882612	118882612	1	*	hyper	2.788e-06
4171	chr4	119327912	119327912	1	*	hypo	1.55017e-07
4173	chr4	119444162	119444162	1	*	hypo	6.29574e-06
4175	chr4	119738901	119738901	1	*	hypo	1.75925e-08
4177	chr5	1088896	1088896	1	*	hyper	3.11188e-06
4179	chr5	1208369	1208369	1	*	hypo	6.01258e-13
4184	chr5	1222665	1222665	1	*	hyper	1.33485e-11
4187	chr5	1330653	1330653	1	*	hyper	1.11028e-06
4192	chr5	1406695	1406695	1	*	hyper	4.78404e-07
4197	chr5	1487709	1487709	1	*	hypo	1.20236e-10
4199	chr5	1682579	1682579	1	*	hyper	3.40545e-07
4202	chr5	1684682	1684682	1	*	hypo	4.01013e-13
4205	chr5	1773873	1773873	1	*	hypo	1.06106e-12
4207	chr5	1851951	1851951	1	*	hyper	1.64285e-08
4209	chr5	1884617	1884617	1	*	hypo	2.1852e-07
4212	chr5	1900966	1900966	1	*	hyper	1.83527e-08
4215	chr5	2468162	2468162	1	*	hypo	1.50688e-07
4218	chr5	2509890	2509890	1	*	hypo	1.21896e-07
4221	chr5	2563370	2563370	1	*	hypo	3.53012e-07
4224	chr5	2948876	2948876	1	*	hyper	2.51885e-07
4226	chr5	2970160	2970160	1	*	hyper	2.69978e-09
4229	chr5	3227420	3227420	1	*	hyper	1.67391e-10
4231	chr5	3817896	3817896	1	*	hypo	1.75397e-06
4233	chr5	5025651	5025651	1	*	hyper	6.79374e-07
4237	chr5	5035705	5035705	1	*	hyper	6.3088e-07
4242	chr5	7645081	7645081	1	*	hypo	7.8865e-07
4246	chr5	9613062	9613062	1	*	hyper	1.40539e-06
4249	chr5	11097499	11097499	1	*	hypo	4.1494e-09
4252	chr5	11179897	11179897	1	*	hyper	1.91899e-06
4254	chr5	11370801	11370801	1	*	hyper	3.59225e-07
4256	chr5	11610218	11610218	1	*	hypo	1.85395e-08
4258	chr5	11630726	11630726	1	*	hyper	7.86642e-08
4260	chr5	11741576	11741576	1	*	hyper	4.34157e-13
4262	chr5	12531162	12531162	1	*	hypo	4.06185e-07
4265	chr5	13323329	13323329	1	*	hypo	3.81283e-08
4268	chr5	15616965	15616965	1	*	hypo	1.12366e-06
4270	chr5	15840706	15840706	1	*	hypo	6.58865e-07
4273	chr5	16995106	16995106	1	*	hypo	8.65078e-08
4275	chr5	19582696	19582696	1	*	hyper	1.60817e-09
4279	chr5	19584243	19584243	1	*	hyper	1.85011e-06
4284	chr5	19585756	19585756	1	*	hyper	4.08371e-07
4289	chr5	19789545	19789545	1	*	hyper	1.81342e-07
4291	chr5	20543675	20543675	1	*	hypo	5.58953e-09
4293	chr5	20999697	20999697	1	*	hypo	5.74227e-08
4296	chr5	22352573	22352573	1	*	hypo	6.03974e-07
4299	chr5	23159017	23159017	1	*	hyper	1.83803e-07
4301	chr5	25654233	25654233	1	*	hypo	8.58002e-10
4303	chr5	25666492	25666492	1	*	hypo	3.6316e-07
4308	chr5	26745654	26745654	1	*	hyper	3.10297e-07
4313	chr5	28787151	28787151	1	*	hypo	8.27548e-07
4316	chr5	42388159	42388159	1	*	hyper	5.7209e-07
4320	chr5	43590074	43590074	1	*	hypo	7.78744e-14
4325	chr5	43628331	43628331	1	*	hyper	1.78717e-07
4330	chr5	47026362	47026362	1	*	hyper	2.24365e-07
4332	chr5	50193271	50193271	1	*	hypo	7.63574e-09
4334	chr5	50648453	50648453	1	*	hyper	7.91716e-07
4338	chr5	51027493	51027493	1	*	hypo	2.66603e-07
4340	chr5	51038476	51038476	1	*	hypo	2.89843e-09
4343	chr5	51045265	51045265	1	*	hypo	2.54814e-10
4345	chr5	51049398	51049398	1	*	hypo	3.43362e-09
4348	chr5	51049870	51049870	1	*	hypo	9.95186e-11
4351	chr5	51055589	51055589	1	*	hypo	7.55062e-09
4353	chr5	51107881	51107881	1	*	hyper	2.09427e-07
4355	chr5	53717030	53717030	1	*	hypo	2.5565e-09
4360	chr5	56320395	56320395	1	*	hypo	2.2502e-07
4363	chr5	56757076	56757076	1	*	hypo	2.31439e-06
4365	chr5	57666872	57666872	1	*	hyper	3.96511e-07
4368	chr5	60193150	60193150	1	*	hyper	1.10724e-06
4370	chr5	60209497	60209497	1	*	hypo	7.63224e-12
4372	chr5	60213534	60213534	1	*	hyper	7.21351e-07
4376	chr5	60218913	60218913	1	*	hyper	1.79584e-06
4381	chr5	60233218	60233218	1	*	hyper	4.01678e-07
4384	chr5	60456185	60456185	1	*	hypo	1.68128e-06
4387	chr5	60727998	60727998	1	*	hypo	8.25025e-08
4390	chr5	60757650	60757650	1	*	hypo	2.42281e-08
4393	chr5	60814378	60814378	1	*	hyper	1.41835e-08
4395	chr5	60835672	60835672	1	*	hyper	1.38261e-07
4398	chr5	60965540	60965540	1	*	hypo	2.35937e-12
4401	chr5	60987378	60987378	1	*	hypo	1.54479e-10
4403	chr5	61199762	61199762	1	*	hypo	6.66921e-08
4406	chr5	62282358	62282358	1	*	hypo	9.99957e-10
4408	chr5	62485664	62485664	1	*	hypo	2.46768e-06
4411	chr5	62525365	62525365	1	*	hypo	9.48568e-07
4414	chr5	62536702	62536702	1	*	hypo	6.61946e-08
4417	chr5	62840898	62840898	1	*	hyper	3.05991e-17
4421	chr5	63368901	63368901	1	*	hypo	3.82187e-09
4423	chr5	63417385	63417385	1	*	hypo	8.52424e-09
4426	chr5	63488068	63488068	1	*	hypo	4.03589e-08
4430	chr5	63488468	63488468	1	*	hypo	1.77371e-06
4433	chr5	63507400	63507400	1	*	hypo	6.42886e-09
4436	chr5	63908595	63908595	1	*	hypo	5.50274e-08
4439	chr5	63979578	63979578	1	*	hypo	4.02954e-12
4442	chr5	64005124	64005124	1	*	hypo	2.18045e-06
4444	chr5	64052656	64052656	1	*	hypo	1.05221e-07
4447	chr5	64520089	64520089	1	*	hypo	4.57701e-09
4450	chr5	64574361	64574361	1	*	hypo	1.44865e-08
4453	chr5	65640772	65640772	1	*	hypo	9.69303e-07
4458	chr5	65731632	65731632	1	*	hypo	1.0229e-06
4463	chr5	65731659	65731659	1	*	hypo	2.03307e-07
4468	chr5	66365648	66365648	1	*	hyper	8.84717e-07
4471	chr5	67006699	67006699	1	*	hypo	4.2731e-07
4473	chr5	67999453	67999453	1	*	hypo	6.03422e-08
4475	chr5	68717356	68717356	1	*	hyper	1.90346e-07
4479	chr5	70757113	70757113	1	*	hyper	6.07233e-07
4484	chr5	71159095	71159095	1	*	hypo	1.52545e-06
4489	chr5	73677851	73677851	1	*	hyper	4.33803e-08
4492	chr5	74777985	74777985	1	*	hyper	8.98025e-07
4496	chr5	76848238	76848238	1	*	hypo	1.52721e-07
4499	chr5	78009166	78009166	1	*	hypo	1.63012e-07
4502	chr5	78045418	78045418	1	*	hypo	1.70706e-08
4505	chr5	78547905	78547905	1	*	hypo	4.5824e-07
4509	chr5	78569314	78569314	1	*	hypo	9.17137e-09
4513	chr5	91502936	91502936	1	*	hypo	1.33555e-07
4518	chr5	93634767	93634767	1	*	hypo	8.34764e-09
4521	chr5	102483923	102483923	1	*	hypo	4.27827e-09
4524	chr5	104340142	104340142	1	*	hypo	2.63087e-07
4529	chr5	104760105	104760105	1	*	hyper	9.19782e-07
4533	chr5	104926427	104926427	1	*	hyper	5.06467e-07
4536	chr5	105120046	105120046	1	*	hyper	4.58571e-07
4538	chr5	105183181	105183181	1	*	hyper	1.87169e-07
4540	chr5	105586961	105586961	1	*	hyper	1.75312e-06
4545	chr5	105870285	105870285	1	*	hyper	3.20387e-06
4547	chr5	105977883	105977883	1	*	hypo	3.76907e-06
4549	chr5	106012891	106012891	1	*	hypo	7.37007e-06
4552	chr5	106092135	106092135	1	*	hypo	1.44773e-06
4555	chr5	106177079	106177079	1	*	hyper	1.60461e-07
4558	chr5	106186898	106186898	1	*	hyper	7.30383e-12
4560	chr5	106187801	106187801	1	*	hyper	3.45847e-11
4562	chr5	106191180	106191180	1	*	hyper	4.74955e-07
4564	chr5	106195802	106195802	1	*	hyper	4.29942e-12
4566	chr5	106242651	106242651	1	*	hyper	5.75194e-06
4568	chr5	106261953	106261953	1	*	hypo	5.44455e-11
4570	chr5	106310841	106310841	1	*	hyper	6.53731e-08
4572	chr5	106565844	106565844	1	*	hyper	4.24023e-06
4574	chr5	106719956	106719956	1	*	hyper	1.92471e-06
4576	chr5	106818303	106818303	1	*	hyper	1.2287e-16
4578	chr5	106821599	106821599	1	*	hyper	8.90649e-11
4581	chr5	106827267	106827267	1	*	hypo	4.67288e-13
4584	chr5	106838524	106838524	1	*	hypo	3.71793e-17
4586	chr5	106879650	106879650	1	*	hypo	3.37552e-07
4590	chr5	106882241	106882241	1	*	hypo	7.64218e-06
4595	chr5	106912047	106912047	1	*	hyper	5.40211e-07
4598	chr5	107356946	107356946	1	*	hyper	3.16502e-06
4602	chr5	107435023	107435023	1	*	hypo	1.61197e-10
4606	chr5	107490754	107490754	1	*	hyper	1.15486e-06
4610	chr5	107515255	107515255	1	*	hyper	1.12991e-06
4612	chr5	107534465	107534465	1	*	hypo	1.57283e-19
4615	chr5	107647232	107647232	1	*	hyper	8.53603e-09
4617	chr5	107653184	107653184	1	*	hyper	9.32991e-33
4620	chr5	107674558	107674558	1	*	hyper	3.69988e-07
4622	chr5	107692392	107692392	1	*	hyper	4.27827e-09
4624	chr5	107703769	107703769	1	*	hyper	2.67942e-10
4626	chr5	107786545	107786545	1	*	hyper	2.77263e-15
4628	chr5	107811476	107811476	1	*	hypo	2.72068e-11
4632	chr5	109028487	109028487	1	*	hyper	5.03155e-08
4634	chr5	109057020	109057020	1	*	hypo	7.66494e-06
4636	chr5	109112736	109112736	1	*	hyper	1.191e-09
4640	chr5	109140834	109140834	1	*	hyper	7.82906e-11
4644	chr5	109150070	109150070	1	*	hypo	5.51907e-08
4649	chr5	109321926	109321926	1	*	hyper	8.33286e-08
4652	chr5	109349055	109349055	1	*	hyper	6.52874e-07
4654	chr5	109522462	109522462	1	*	hyper	2.22321e-07
4659	chr5	109524748	109524748	1	*	hyper	4.43814e-09
4662	chr5	109524965	109524965	1	*	hyper	9.95177e-09
4666	chr5	109559303	109559303	1	*	hyper	6.13132e-06
4669	chr5	109561816	109561816	1	*	hyper	1.91245e-06
4672	chr5	109678883	109678883	1	*	hyper	7.34982e-06
4677	chr5	109828849	109828849	1	*	hyper	1.4681e-09
4680	chr5	109840165	109840165	1	*	hyper	2.72821e-06
4684	chr5	109853639	109853639	1	*	hyper	9.46162e-07
4686	chr5	109992896	109992896	1	*	hyper	4.66996e-17
4691	chr5	110010767	110010767	1	*	hyper	4.91483e-09
4695	chr5	110090997	110090997	1	*	hyper	1.20377e-06
4698	chr5	110326419	110326419	1	*	hyper	4.68149e-06
4703	chr5	110439884	110439884	1	*	hyper	7.69273e-06
4706	chr5	110452368	110452368	1	*	hyper	2.48042e-08
4709	chr5	110930419	110930419	1	*	hyper	3.51234e-08
4713	chr5	111089715	111089715	1	*	hyper	3.1318e-07
4715	chr5	111242996	111242996	1	*	hypo	3.42458e-06
4720	chr5	111703321	111703321	1	*	hypo	5.08089e-07
4723	chr5	111732480	111732480	1	*	hypo	7.15037e-10
4727	chr5	111742764	111742764	1	*	hypo	2.872e-09
4729	chr5	111755799	111755799	1	*	hypo	1.91972e-14
4731	chr5	112609490	112609490	1	*	hypo	4.33464e-06
4735	chr5	113770228	113770228	1	*	hypo	5.33377e-06
4740	chr5	113834084	113834084	1	*	hypo	1.15377e-06
4744	chr5	114025996	114025996	1	*	hyper	1.05081e-06
4746	chr5	114127123	114127123	1	*	hyper	5.44216e-06
4748	chr5	114149094	114149094	1	*	hypo	1.05283e-11
4751	chr5	114203697	114203697	1	*	hyper	6.30948e-06
4753	chr5	114302053	114302053	1	*	hypo	4.67947e-07
4755	chr5	114356983	114356983	1	*	hypo	4.38625e-08
4758	chr5	114433626	114433626	1	*	hyper	2.47144e-08
4760	chr5	114440918	114440918	1	*	hyper	3.02088e-06
4762	chr5	114474601	114474601	1	*	hypo	3.65566e-07
4765	chr5	114500788	114500788	1	*	hyper	5.35493e-06
4768	chr5	114798644	114798644	1	*	hyper	4.23412e-07
4774	chr5	114827116	114827116	1	*	hyper	1.37231e-06
4779	chr5	114920432	114920432	1	*	hyper	1.76721e-08
4781	chr5	116054821	116054821	1	*	hyper	2.72894e-10
4785	chr5	116097960	116097960	1	*	hyper	1.4953e-08
4790	chr5	116102347	116102347	1	*	hyper	6.33649e-06
4794	chr5	116143072	116143072	1	*	hyper	5.90015e-12
4798	chr5	116149894	116149894	1	*	hyper	1.56619e-06
4803	chr5	116152965	116152965	1	*	hyper	3.8318e-09
4808	chr5	116274650	116274650	1	*	hyper	1.67315e-06
4810	chr5	116315507	116315507	1	*	hyper	3.32595e-07
4812	chr5	116373994	116373994	1	*	hyper	5.36853e-12
4814	chr5	116386388	116386388	1	*	hyper	2.85375e-09
4816	chr5	116394759	116394759	1	*	hyper	3.30218e-09
4818	chr5	116489986	116489986	1	*	hypo	3.34769e-06
4823	chr5	116525083	116525083	1	*	hypo	1.81517e-06
4826	chr5	116537795	116537795	1	*	hyper	1.04782e-07
4828	chr5	116736329	116736329	1	*	hyper	3.91793e-06
4830	chr5	116818043	116818043	1	*	hyper	4.20028e-06
4833	chr5	116845685	116845685	1	*	hypo	1.7452e-07
4836	chr5	116926240	116926240	1	*	hypo	5.89348e-07
4838	chr5	116936491	116936491	1	*	hyper	6.58024e-10
4841	chr5	116949255	116949255	1	*	hyper	2.79446e-09
4843	chr5	116949814	116949814	1	*	hyper	2.21412e-06
4845	chr5	117187286	117187286	1	*	hypo	3.32886e-07
4849	chr5	117203604	117203604	1	*	hypo	1.2186e-06
4853	chr5	117220555	117220555	1	*	hypo	1.21587e-10
4857	chr5	117550391	117550391	1	*	hyper	6.50303e-08
4860	chr5	117693581	117693581	1	*	hyper	6.06616e-06
4863	chr5	117859057	117859057	1	*	hypo	7.63357e-07
4865	chr5	117939963	117939963	1	*	hyper	4.19438e-06
4867	chr5	118620743	118620743	1	*	hyper	7.1679e-07
4869	chr5	118660140	118660140	1	*	hypo	3.08954e-06
4871	chr5	118707321	118707321	1	*	hyper	3.28849e-06
4873	chr5	119137468	119137468	1	*	hyper	1.74497e-12
4875	chr5	119288353	119288353	1	*	hyper	8.7581e-07
4877	chr5	119290103	119290103	1	*	hypo	1.9535e-07
4879	chr6	220031	220031	1	*	hyper	2.01133e-08
4881	chr6	592142	592142	1	*	hyper	3.94754e-09
4883	chr6	1025512	1025512	1	*	hypo	2.47898e-06
4886	chr6	1086323	1086323	1	*	hyper	2.87047e-08
4889	chr6	1590202	1590202	1	*	hypo	1.14567e-10
4892	chr6	3517479	3517479	1	*	hypo	1.1954e-06
4895	chr6	3528240	3528240	1	*	hyper	8.8879e-10
4898	chr6	3530530	3530530	1	*	hyper	1.7859e-09
4900	chr6	4515743	4515743	1	*	hypo	3.15084e-06
4903	chr6	4608310	4608310	1	*	hypo	2.51832e-07
4908	chr6	4781453	4781453	1	*	hyper	1.97655e-08
4910	chr6	4815350	4815350	1	*	hypo	1.31927e-09
4913	chr6	4865091	4865091	1	*	hyper	3.07296e-07
4916	chr6	4869140	4869140	1	*	hypo	1.01248e-06
4919	chr6	4994283	4994283	1	*	hyper	1.90917e-07
4922	chr6	5057948	5057948	1	*	hyper	1.98194e-06
4925	chr6	5067559	5067559	1	*	hyper	5.00986e-10
4927	chr6	5069375	5069375	1	*	hyper	9.94831e-12
4930	chr6	5074514	5074514	1	*	hyper	3.35015e-08
4932	chr6	5112785	5112785	1	*	hyper	4.68743e-15
4935	chr6	5122587	5122587	1	*	hyper	1.03009e-08
4938	chr6	5126498	5126498	1	*	hyper	1.60192e-12
4941	chr6	5129461	5129461	1	*	hyper	3.01512e-10
4943	chr6	5132992	5132992	1	*	hyper	2.47523e-13
4946	chr6	5163730	5163730	1	*	hyper	2.3903e-11
4949	chr6	5166097	5166097	1	*	hyper	4.14763e-07
4952	chr6	5166146	5166146	1	*	hyper	1.0713e-07
4954	chr6	5225144	5225144	1	*	hyper	1.30556e-07
4956	chr6	5225173	5225173	1	*	hyper	1.29834e-06
4958	chr6	5227728	5227728	1	*	hyper	3.87561e-07
4961	chr6	5263190	5263190	1	*	hyper	1.18358e-09
4963	chr6	5285210	5285210	1	*	hypo	8.8454e-07
4965	chr6	6015408	6015408	1	*	hypo	2.70236e-07
4967	chr6	6266183	6266183	1	*	hyper	1.37047e-07
4972	chr6	6509452	6509452	1	*	hypo	1.31669e-06
4974	chr6	6518587	6518587	1	*	hypo	9.24092e-08
4977	chr6	6590812	6590812	1	*	hyper	2.40539e-13
4979	chr6	6646161	6646161	1	*	hyper	1.76882e-11
4984	chr6	6659311	6659311	1	*	hypo	2.1617e-11
4989	chr6	6687903	6687903	1	*	hyper	1.09973e-10
4992	chr6	6718441	6718441	1	*	hyper	2.28775e-08
4994	chr6	6802488	6802488	1	*	hypo	2.6761e-13
4999	chr6	6832663	6832663	1	*	hyper	2.91641e-06
5004	chr6	6832828	6832828	1	*	hyper	1.60078e-08
5009	chr6	6842485	6842485	1	*	hyper	4.12652e-08
5014	chr6	6913395	6913395	1	*	hypo	1.62885e-07
5017	chr6	7376275	7376275	1	*	hyper	2.8559e-07
5019	chr6	7387865	7387865	1	*	hypo	9.12037e-07
5022	chr6	7407394	7407394	1	*	hypo	7.58798e-08
5024	chr6	7431942	7431942	1	*	hypo	1.70135e-09
5026	chr6	7538366	7538366	1	*	hyper	3.65097e-06
5028	chr6	8768465	8768465	1	*	hypo	3.62168e-07
5030	chr6	9511429	9511429	1	*	hypo	4.37963e-07
5033	chr6	9946586	9946586	1	*	hyper	2.92834e-09
5035	chr6	10282860	10282860	1	*	hypo	4.03804e-09
5038	chr6	10501106	10501106	1	*	hypo	1.43176e-06
5041	chr6	10507695	10507695	1	*	hypo	9.56986e-08
5045	chr6	10708089	10708089	1	*	hyper	1.7226e-06
5050	chr6	10851558	10851558	1	*	hyper	1.54343e-06
5053	chr6	11017906	11017906	1	*	hyper	1.32996e-06
5058	chr6	11220373	11220373	1	*	hyper	1.64706e-07
5060	chr6	11302770	11302770	1	*	hyper	8.02783e-08
5063	chr6	11411724	11411724	1	*	hyper	8.28743e-09
5066	chr6	11514662	11514662	1	*	hypo	6.83979e-10
5068	chr6	11521320	11521320	1	*	hyper	3.71472e-10
5070	chr6	11522148	11522148	1	*	hyper	5.92056e-07
5072	chr6	11572003	11572003	1	*	hyper	3.3545e-08
5075	chr6	11616093	11616093	1	*	hypo	1.91922e-06
5078	chr6	11664380	11664380	1	*	hypo	3.15554e-07
5081	chr6	11665229	11665229	1	*	hypo	3.41687e-08
5084	chr6	11779219	11779219	1	*	hyper	2.13601e-08
5086	chr6	11872457	11872457	1	*	hyper	2.26087e-06
5091	chr6	11922313	11922313	1	*	hyper	4.55156e-06
5095	chr6	11924548	11924548	1	*	hyper	8.04482e-07
5099	chr6	11927091	11927091	1	*	hypo	1.00513e-07
5103	chr6	11933529	11933529	1	*	hypo	5.17308e-08
5107	chr6	11988931	11988931	1	*	hyper	2.03723e-06
5112	chr6	12019376	12019376	1	*	hyper	1.61376e-08
5117	chr6	12021147	12021147	1	*	hyper	9.22611e-08
5121	chr6	13416809	13416809	1	*	hypo	2.10923e-06
5123	chr6	13577595	13577595	1	*	hyper	1.29214e-07
5125	chr6	13764922	13764922	1	*	hypo	3.48758e-06
5128	chr6	16786986	16786986	1	*	hypo	4.05175e-07
5130	chr6	17214978	17214978	1	*	hyper	2.76563e-07
5134	chr6	22172529	22172529	1	*	hypo	8.67707e-07
5138	chr6	23989037	23989037	1	*	hypo	1.04782e-08
5141	chr6	24003593	24003593	1	*	hypo	2.32752e-08
5143	chr6	26138790	26138790	1	*	hyper	1.56517e-08
5148	chr6	30755905	30755905	1	*	hyper	8.18422e-07
5151	chr6	32195888	32195888	1	*	hyper	8.30394e-08
5153	chr6	34064846	34064846	1	*	hyper	1.83792e-06
5158	chr6	34104607	34104607	1	*	hyper	1.40183e-06
5163	chr6	34839007	34839007	1	*	hyper	2.24838e-07
5166	chr6	34863920	34863920	1	*	hyper	5.31808e-07
5171	chr6	36103161	36103161	1	*	hyper	1.27932e-06
5175	chr6	37170248	37170248	1	*	hypo	1.26995e-06
5179	chr6	37421330	37421330	1	*	hyper	4.58653e-08
5184	chr6	37782744	37782744	1	*	hyper	4.4494e-06
5187	chr6	37805738	37805738	1	*	hypo	6.66981e-07
5190	chr6	37909862	37909862	1	*	hypo	2.33641e-07
5193	chr6	39175761	39175761	1	*	hypo	3.32514e-06
5196	chr6	40249395	40249395	1	*	hyper	1.80686e-07
5200	chr6	40272372	40272372	1	*	hyper	3.67398e-06
5204	chr6	40299614	40299614	1	*	hyper	1.55597e-07
5208	chr6	40404264	40404264	1	*	hyper	6.16693e-07
5210	chr6	41829620	41829620	1	*	hypo	1.04659e-07
5213	chr6	41978835	41978835	1	*	hypo	2.95425e-09
5215	chr6	42395096	42395096	1	*	hyper	4.34393e-07
5220	chr6	42418793	42418793	1	*	hyper	2.16234e-09
5222	chr6	42658835	42658835	1	*	hyper	3.2147e-14
5224	chr6	42682350	42682350	1	*	hypo	1.09182e-06
5227	chr6	43090581	43090581	1	*	hypo	1.77314e-09
5230	chr6	43547981	43547981	1	*	hyper	7.23074e-13
5232	chr6	44502086	44502086	1	*	hypo	3.49218e-07
5237	chr6	44526515	44526515	1	*	hypo	1.02278e-11
5240	chr6	44565961	44565961	1	*	hypo	5.8885e-09
5243	chr6	45478239	45478239	1	*	hyper	3.70026e-06
5246	chr6	45505697	45505697	1	*	hyper	2.79028e-06
5248	chr6	45939414	45939414	1	*	hypo	7.80614e-07
5251	chr6	46300200	46300200	1	*	hyper	2.77877e-09
5254	chr6	46432546	46432546	1	*	hyper	7.8761e-08
5257	chr6	46927474	46927474	1	*	hyper	5.2776e-06
5259	chr6	46980119	46980119	1	*	hypo	1.77793e-10
5261	chr6	46989430	46989430	1	*	hypo	8.39621e-10
5263	chr6	47075389	47075389	1	*	hypo	1.11288e-06
5265	chr6	47120881	47120881	1	*	hypo	1.72817e-07
5268	chr6	47141425	47141425	1	*	hyper	4.28599e-07
5271	chr6	47700930	47700930	1	*	hyper	4.56322e-06
5274	chr6	48210007	48210007	1	*	hyper	7.37989e-07
5277	chr6	48833800	48833800	1	*	hypo	9.03544e-08
5280	chr6	49450402	49450402	1	*	hypo	5.84797e-06
5282	chr6	50182470	50182470	1	*	hypo	1.35727e-08
5286	chr6	50184985	50184985	1	*	hypo	5.28933e-06
5290	chr6	50344871	50344871	1	*	hyper	2.11179e-06
5295	chr6	50682034	50682034	1	*	hyper	6.57115e-08
5297	chr6	50694834	50694834	1	*	hyper	4.17311e-06
5300	chr6	50871447	50871447	1	*	hypo	8.95065e-07
5303	chr6	51040825	51040825	1	*	hyper	1.20567e-06
5306	chr6	51562461	51562461	1	*	hypo	7.12685e-07
5309	chr6	51674797	51674797	1	*	hypo	1.18219e-06
5312	chr6	51878100	51878100	1	*	hyper	2.08242e-07
5315	chr6	51904405	51904405	1	*	hypo	4.69655e-11
5318	chr6	52376089	52376089	1	*	hypo	4.64929e-09
5320	chr6	52565586	52565586	1	*	hypo	3.55617e-06
5322	chr6	52605580	52605580	1	*	hyper	1.07309e-06
5324	chr6	52874448	52874448	1	*	hyper	6.06616e-06
5326	chr6	52947557	52947557	1	*	hyper	8.66158e-09
5329	chr6	53031497	53031497	1	*	hyper	1.89126e-07
5332	chr6	53213398	53213398	1	*	hypo	3.74563e-07
5335	chr6	53314885	53314885	1	*	hypo	2.7785e-07
5337	chr6	53318875	53318875	1	*	hypo	2.70194e-07
5339	chr6	53342554	53342554	1	*	hypo	4.55154e-07
5342	chr6	53388195	53388195	1	*	hyper	2.24759e-07
5347	chr6	53480467	53480467	1	*	hypo	2.69162e-06
5349	chr6	53491806	53491806	1	*	hypo	1.92483e-07
5352	chr6	53708112	53708112	1	*	hypo	2.42181e-10
5355	chr6	53952772	53952772	1	*	hyper	3.38972e-07
5357	chr6	54199158	54199158	1	*	hyper	1.01542e-06
5359	chr6	54230234	54230234	1	*	hypo	2.8614e-07
5362	chr6	54232854	54232854	1	*	hypo	1.85477e-06
5365	chr6	54397280	54397280	1	*	hypo	1.59203e-11
5368	chr6	54420098	54420098	1	*	hypo	7.07781e-08
5371	chr6	54467371	54467371	1	*	hypo	1.44376e-08
5374	chr6	54810137	54810137	1	*	hypo	1.91384e-07
5377	chr6	54840248	54840248	1	*	hypo	2.46024e-06
5379	chr6	54854435	54854435	1	*	hypo	3.33634e-10
5381	chr6	54917074	54917074	1	*	hypo	8.35097e-08
5384	chr6	54937733	54937733	1	*	hypo	5.79619e-06
5386	chr6	56775918	56775918	1	*	hyper	2.36789e-07
5389	chr6	56942879	56942879	1	*	hyper	2.76505e-07
5392	chr6	56976663	56976663	1	*	hyper	1.68446e-07
5396	chr6	57603863	57603863	1	*	hypo	4.3368e-06
5399	chr6	57617889	57617889	1	*	hypo	5.91783e-08
5401	chr6	57634972	57634972	1	*	hypo	1.88153e-06
5404	chr6	58123880	58123880	1	*	hyper	7.37618e-08
5406	chr6	58154867	58154867	1	*	hyper	1.11622e-11
5408	chr6	58170273	58170273	1	*	hyper	5.48336e-12
5411	chr6	58801875	58801875	1	*	hyper	4.78608e-13
5416	chr6	60275313	60275313	1	*	hyper	3.79026e-07
5418	chr6	60990932	60990932	1	*	hyper	1.48462e-06
5422	chr6	61382423	61382423	1	*	hyper	1.68288e-06
5427	chr6	61408589	61408589	1	*	hyper	3.38351e-10
5431	chr6	61526066	61526066	1	*	hyper	5.64684e-06
5434	chr6	61605821	61605821	1	*	hyper	5.90194e-06
5437	chr6	61734568	61734568	1	*	hyper	2.13956e-06
5440	chr6	62350221	62350221	1	*	hyper	2.84665e-07
5443	chr6	64549432	64549432	1	*	hypo	2.99521e-07
5446	chr6	64554776	64554776	1	*	hypo	8.3526e-07
5449	chr6	64583679	64583679	1	*	hypo	9.19782e-07
5454	chr6	64620583	64620583	1	*	hypo	2.1357e-07
5459	chr6	64646060	64646060	1	*	hypo	8.76815e-07
5464	chr6	64821851	64821851	1	*	hypo	3.35824e-07
5468	chr6	67921385	67921385	1	*	hyper	1.18794e-08
5470	chr6	70286705	70286705	1	*	hyper	1.02436e-06
5473	chr6	70599049	70599049	1	*	hypo	7.1966e-08
5477	chr6	70808227	70808227	1	*	hypo	2.50314e-08
5481	chr6	75855774	75855774	1	*	hyper	2.24741e-07
5483	chr6	85658794	85658794	1	*	hyper	4.61386e-07
5488	chr6	86426669	86426669	1	*	hyper	7.94805e-08
5491	chr6	87759396	87759396	1	*	hypo	2.32074e-08
5493	chr6	89381029	89381029	1	*	hypo	2.2504e-07
5497	chr6	91514083	91514083	1	*	hyper	6.37762e-07
5502	chr6	91798606	91798606	1	*	hyper	1.60202e-06
5507	chr6	91861387	91861387	1	*	hyper	9.61421e-08
5511	chr6	92082246	92082246	1	*	hyper	4.42355e-08
5513	chr6	93365944	93365944	1	*	hypo	2.09867e-08
5518	chr6	93390571	93390571	1	*	hyper	3.03231e-07
5520	chr6	93571583	93571583	1	*	hyper	6.35664e-07
5525	chr6	93806454	93806454	1	*	hypo	1.2473e-09
5528	chr6	93936660	93936660	1	*	hypo	2.7718e-10
5531	chr6	96454715	96454715	1	*	hyper	2.18521e-06
5534	chr6	98337908	98337908	1	*	hyper	9.83336e-07
5538	chr6	101904651	101904651	1	*	hypo	2.0818e-06
5540	chr6	104498150	104498150	1	*	hypo	1.36093e-07
5542	chr6	104781610	104781610	1	*	hyper	1.58615e-09
5545	chr6	104970228	104970228	1	*	hypo	3.41571e-06
5548	chr6	105208922	105208922	1	*	hyper	4.59836e-07
5551	chr6	106101989	106101989	1	*	hypo	9.69662e-12
5554	chr6	106106858	106106858	1	*	hyper	1.01617e-06
5556	chr6	106848878	106848878	1	*	hypo	2.91641e-06
5559	chr6	107281040	107281040	1	*	hypo	7.47757e-08
5562	chr6	107341677	107341677	1	*	hyper	1.8749e-07
5565	chr6	109853038	109853038	1	*	hypo	1.63935e-06
5568	chr6	111386712	111386712	1	*	hyper	1.76047e-09
5570	chr6	111393098	111393098	1	*	hyper	9.89819e-10
5572	chr6	111499387	111499387	1	*	hypo	7.64737e-08
5575	chr6	111762282	111762282	1	*	hypo	4.9648e-07
5580	chr6	111928882	111928882	1	*	hyper	4.50061e-10
5586	chr6	112686697	112686697	1	*	hyper	6.31602e-07
5589	chr6	112733896	112733896	1	*	hyper	1.12492e-08
5592	chr6	112890954	112890954	1	*	hyper	3.34067e-06
5595	chr6	112894938	112894938	1	*	hyper	9.8636e-08
5598	chr6	112898334	112898334	1	*	hyper	6.51817e-07
5601	chr6	112907428	112907428	1	*	hyper	9.30719e-09
5604	chr6	112977860	112977860	1	*	hypo	2.28969e-06
5607	chr6	113181965	113181965	1	*	hypo	2.99521e-07
5610	chr6	113237004	113237004	1	*	hyper	1.01027e-07
5612	chr6	113474933	113474933	1	*	hyper	1.28329e-07
5616	chr6	113484784	113484784	1	*	hypo	1.66788e-09
5620	chr6	113680448	113680448	1	*	hypo	2.55415e-06
5622	chr6	113684670	113684670	1	*	hypo	7.76191e-09
5625	chr6	113730387	113730387	1	*	hyper	2.40105e-06
5628	chr6	113760028	113760028	1	*	hyper	4.59687e-10
5630	chr6	113785890	113785890	1	*	hypo	7.13537e-07
5632	chr6	113794123	113794123	1	*	hyper	7.3873e-08
5634	chr6	113830129	113830129	1	*	hypo	6.93747e-07
5636	chr6	113834074	113834074	1	*	hypo	4.88856e-08
5638	chr6	113867893	113867893	1	*	hyper	1.70331e-12
5641	chr6	113870189	113870189	1	*	hyper	4.39936e-09
5643	chr6	113870568	113870568	1	*	hyper	9.87842e-11
5645	chr6	114034465	114034465	1	*	hyper	1.83798e-07
5647	chr6	114257432	114257432	1	*	hyper	5.21533e-14
5652	chr6	114790312	114790312	1	*	hyper	2.59921e-07
5655	chr6	114798411	114798411	1	*	hyper	2.26365e-08
5660	chr6	115005379	115005379	1	*	hypo	2.66372e-06
5662	chr6	116417126	116417126	1	*	hypo	1.2138e-07
5665	chr6	116430902	116430902	1	*	hypo	8.04384e-08
5668	chr6	116490756	116490756	1	*	hypo	2.1861e-08
5670	chr7	1057358	1057358	1	*	hypo	3.43024e-07
5674	chr7	1057467	1057467	1	*	hypo	5.77466e-10
5678	chr7	1095013	1095013	1	*	hypo	2.68758e-07
5683	chr7	1116242	1116242	1	*	hypo	5.473e-10
5686	chr7	1601078	1601078	1	*	hypo	2.94246e-09
5688	chr7	1715879	1715879	1	*	hypo	1.27878e-08
5690	chr7	1936788	1936788	1	*	hyper	5.56041e-08
5692	chr7	1983959	1983959	1	*	hypo	3.78093e-08
5694	chr7	2308480	2308480	1	*	hypo	5.95715e-09
5697	chr7	2673849	2673849	1	*	hypo	1.17172e-09
5699	chr7	3007911	3007911	1	*	hyper	1.94586e-08
5703	chr7	3204405	3204405	1	*	hypo	1.3858e-07
5705	chr7	3630953	3630953	1	*	hypo	6.77793e-10
5707	chr7	3689226	3689226	1	*	hypo	1.19548e-06
5710	chr7	3823595	3823595	1	*	hyper	4.98399e-07
5714	chr7	3834129	3834129	1	*	hyper	1.52561e-08
5718	chr7	3844075	3844075	1	*	hyper	1.60464e-09
5722	chr7	4734320	4734320	1	*	hyper	9.67901e-07
5725	chr7	4886836	4886836	1	*	hyper	2.98192e-08
5730	chr7	5649532	5649532	1	*	hyper	1.66574e-06
5733	chr7	6831070	6831070	1	*	hyper	3.07144e-09
5739	chr7	11913429	11913429	1	*	hyper	1.78699e-08
5741	chr7	12560685	12560685	1	*	hyper	4.52169e-07
5743	chr7	12631144	12631144	1	*	hyper	1.64145e-07
5747	chr7	16268849	16268849	1	*	hyper	3.41969e-07
5750	chr7	16275010	16275010	1	*	hyper	6.20761e-07
5752	chr7	19234406	19234406	1	*	hypo	7.50202e-10
5756	chr7	19235958	19235958	1	*	hypo	8.14956e-08
5760	chr7	20771078	20771078	1	*	hypo	1.72063e-07
5762	chr7	20940339	20940339	1	*	hypo	1.89309e-07
5766	chr7	20966232	20966232	1	*	hypo	3.63548e-09
5771	chr7	21202103	21202103	1	*	hyper	3.16768e-06
5774	chr7	21856945	21856945	1	*	hypo	4.24023e-06
5779	chr7	21988758	21988758	1	*	hyper	1.75561e-06
5781	chr7	21990584	21990584	1	*	hyper	4.46593e-09
5784	chr7	22612425	22612425	1	*	hyper	6.16812e-08
5787	chr7	25647000	25647000	1	*	hyper	4.12667e-06
5791	chr7	25880650	25880650	1	*	hyper	1.09573e-10
5793	chr7	26012461	26012461	1	*	hyper	4.64413e-12
5795	chr7	26214343	26214343	1	*	hypo	4.13576e-06
5798	chr7	26359204	26359204	1	*	hyper	2.82367e-07
5801	chr7	26398023	26398023	1	*	hyper	6.97053e-10
5803	chr7	26456684	26456684	1	*	hypo	1.76786e-06
5808	chr7	26549491	26549491	1	*	hyper	6.03563e-08
5811	chr7	26628025	26628025	1	*	hypo	9.48552e-07
5816	chr7	26696573	26696573	1	*	hypo	1.20163e-14
5820	chr7	26720574	26720574	1	*	hypo	2.8613e-09
5825	chr7	27084872	27084872	1	*	hyper	3.35528e-08
5830	chr7	27268300	27268300	1	*	hyper	3.33644e-07
5834	chr7	27407797	27407797	1	*	hypo	1.52598e-07
5839	chr7	28121588	28121588	1	*	hyper	4.06193e-06
5841	chr7	28358178	28358178	1	*	hypo	1.82216e-12
5843	chr7	28372468	28372468	1	*	hypo	1.01049e-06
5845	chr7	28659699	28659699	1	*	hyper	2.55639e-08
5848	chr7	28683567	28683567	1	*	hyper	1.46928e-07
5851	chr7	28713523	28713523	1	*	hypo	2.49833e-09
5854	chr7	30747719	30747719	1	*	hypo	1.54164e-08
5857	chr7	30749498	30749498	1	*	hypo	7.28928e-09
5860	chr7	31467046	31467046	1	*	hypo	2.8196e-06
5863	chr7	31477152	31477152	1	*	hypo	1.9323e-07
5866	chr7	32008658	32008658	1	*	hypo	7.88245e-07
5868	chr7	32735288	32735288	1	*	hypo	3.42193e-06
5870	chr7	33425794	33425794	1	*	hypo	8.00702e-08
5873	chr7	33725400	33725400	1	*	hyper	2.11836e-08
5876	chr7	33725676	33725676	1	*	hyper	9.4137e-09
5879	chr7	33866950	33866950	1	*	hyper	1.32018e-06
5881	chr7	34274315	34274315	1	*	hyper	4.13444e-06
5883	chr7	34427144	34427144	1	*	hypo	3.98254e-06
5887	chr7	34572584	34572584	1	*	hypo	9.31985e-08
5889	chr7	34690189	34690189	1	*	hypo	7.53424e-10
5891	chr7	36207954	36207954	1	*	hyper	3.18367e-11
5894	chr7	36340999	36340999	1	*	hyper	1.21354e-06
5897	chr7	36433261	36433261	1	*	hyper	7.15445e-10
5900	chr7	36434609	36434609	1	*	hyper	2.75554e-06
5903	chr7	36619805	36619805	1	*	hyper	4.3368e-06
5906	chr7	36622854	36622854	1	*	hyper	6.69069e-08
5908	chr7	36659321	36659321	1	*	hyper	5.76031e-12
5910	chr7	36817842	36817842	1	*	hyper	4.38421e-07
5912	chr7	36848288	36848288	1	*	hyper	2.16232e-09
5915	chr7	37026536	37026536	1	*	hyper	8.4609e-09
5918	chr7	37485594	37485594	1	*	hypo	1.8098e-06
5921	chr7	37676541	37676541	1	*	hyper	1.9158e-08
5925	chr7	37684785	37684785	1	*	hypo	1.98904e-06
5929	chr7	37819892	37819892	1	*	hyper	9.05652e-07
5931	chr7	38019482	38019482	1	*	hypo	2.03855e-10
5933	chr7	38410564	38410564	1	*	hyper	7.56287e-09
5939	chr7	38779938	38779938	1	*	hyper	4.08685e-06
5945	chr7	38844747	38844747	1	*	hyper	5.5092e-07
5950	chr7	39098716	39098716	1	*	hypo	2.15181e-06
5953	chr7	39158307	39158307	1	*	hypo	3.74495e-10
5956	chr7	39504157	39504157	1	*	hyper	1.65025e-09
5959	chr7	39535071	39535071	1	*	hyper	1.9083e-06
5962	chr7	39542556	39542556	1	*	hypo	2.18044e-11
5964	chr7	39718000	39718000	1	*	hypo	5.49635e-09
5966	chr7	39734725	39734725	1	*	hyper	5.94766e-08
5969	chr7	40200916	40200916	1	*	hypo	2.0455e-08
5972	chr7	40774182	40774182	1	*	hyper	2.06782e-07
5975	chr7	41381888	41381888	1	*	hypo	3.89218e-06
5977	chr7	44298045	44298045	1	*	hyper	1.97884e-08
5980	chr7	48025447	48025447	1	*	hyper	3.25648e-08
5983	chr7	51430689	51430689	1	*	hyper	5.14563e-07
5987	chr7	52323299	52323299	1	*	hyper	3.49218e-07
5990	chr7	53716067	53716067	1	*	hypo	2.47365e-07
5996	chr7	54469520	54469520	1	*	hyper	3.48458e-07
5999	chr7	56428955	56428955	1	*	hypo	1.78137e-08
6001	chr7	57462141	57462141	1	*	hypo	8.67248e-08
6006	chr7	60534632	60534632	1	*	hyper	6.23666e-11
6011	chr7	61179333	61179333	1	*	hyper	4.55544e-10
6013	chr7	62702948	62702948	1	*	hypo	7.91403e-08
6018	chr7	65066377	65066377	1	*	hyper	2.12497e-06
6022	chr7	65644729	65644729	1	*	hypo	2.08104e-08
6024	chr7	65731365	65731365	1	*	hyper	1.55597e-07
6027	chr7	66092230	66092230	1	*	hyper	2.95886e-07
6030	chr7	66444465	66444465	1	*	hyper	6.7115e-08
6032	chr7	67257543	67257543	1	*	hypo	1.21738e-06
6035	chr7	67899260	67899260	1	*	hypo	1.69524e-07
6039	chr7	67967004	67967004	1	*	hypo	6.58357e-08
6043	chr7	71814423	71814423	1	*	hyper	7.08654e-09
6045	chr7	71830406	71830406	1	*	hyper	1.05611e-12
6047	chr7	71833483	71833483	1	*	hyper	3.48543e-11
6049	chr7	71834300	71834300	1	*	hyper	4.37778e-09
6051	chr7	72168519	72168519	1	*	hyper	1.88936e-06
6054	chr7	72343276	72343276	1	*	hypo	1.14125e-08
6056	chr7	72344274	72344274	1	*	hypo	2.48196e-08
6059	chr7	72370813	72370813	1	*	hyper	1.96876e-09
6061	chr7	74864839	74864839	1	*	hypo	4.94298e-09
6063	chr7	77378711	77378711	1	*	hypo	1.24818e-07
6066	chr7	77380854	77380854	1	*	hypo	3.01264e-07
6068	chr7	78566601	78566601	1	*	hyper	5.26652e-10
6071	chr7	78600759	78600759	1	*	hyper	3.49489e-07
6074	chr7	78785366	78785366	1	*	hyper	4.86253e-08
6077	chr7	79696730	79696730	1	*	hyper	1.60301e-06
6079	chr7	79852753	79852753	1	*	hypo	8.6721e-07
6082	chr7	81053598	81053598	1	*	hyper	1.51615e-06
6084	chr7	81929141	81929141	1	*	hypo	4.30032e-07
6087	chr7	81973977	81973977	1	*	hypo	8.40993e-08
6092	chr7	81976116	81976116	1	*	hyper	8.65602e-08
6096	chr7	84536286	84536286	1	*	hyper	1.05221e-07
6099	chr7	88662780	88662780	1	*	hypo	4.46041e-07
6102	chr7	89646845	89646845	1	*	hypo	1.53029e-06
6105	chr7	89699904	89699904	1	*	hypo	3.49555e-09
6107	chr7	90453183	90453183	1	*	hyper	1.81051e-06
6109	chr7	96589905	96589905	1	*	hyper	1.16738e-08
6113	chr7	98073149	98073149	1	*	hypo	3.43556e-08
6116	chr7	99177376	99177376	1	*	hyper	4.83148e-07
6119	chr7	103085584	103085584	1	*	hyper	6.14833e-08
6122	chr7	103430960	103430960	1	*	hypo	1.78001e-06
6124	chr7	106666920	106666920	1	*	hyper	2.19501e-08
6128	chr7	106794730	106794730	1	*	hyper	1.35703e-09
6130	chr7	106850894	106850894	1	*	hyper	5.73864e-07
[truncated: 5,496 more rows]

## Sheet: TableS4B_CHH_DMC_list
Table S4B List of differentially methylated cytosine sites in the context of CHH
	seqnames	start	end	width	strand	DM_status	pvalue
1	chr1	307990	307990	1	*	hypo	2.57388e-06
4	chr1	681362	681362	1	*	hyper	3.52333e-07
7	chr1	686275	686275	1	*	hyper	8.85674e-08
9	chr1	687820	687820	1	*	hyper	7.60204e-07
12	chr1	707530	707530	1	*	hyper	1.50494e-06
15	chr1	730113	730113	1	*	hyper	1.00669e-06
17	chr1	789987	789987	1	*	hyper	2.41526e-07
20	chr1	791040	791040	1	*	hyper	3.14813e-06
22	chr1	792194	792194	1	*	hyper	1.91649e-06
25	chr1	792200	792200	1	*	hyper	2.47898e-06
28	chr1	1070346	1070346	1	*	hyper	3.4603e-06
31	chr1	1106022	1106022	1	*	hyper	1.10271e-08
35	chr1	1216310	1216310	1	*	hyper	1.55334e-06
37	chr1	1270578	1270578	1	*	hypo	1.63171e-06
40	chr1	1449316	1449316	1	*	hyper	7.21983e-08
45	chr1	1557544	1557544	1	*	hyper	2.56611e-07
47	chr1	1567880	1567880	1	*	hypo	9.34989e-07
49	chr1	1585903	1585903	1	*	hyper	2.90186e-06
52	chr1	1612900	1612900	1	*	hyper	1.54666e-07
55	chr1	1712039	1712039	1	*	hyper	4.92991e-06
57	chr1	1726651	1726651	1	*	hyper	4.60336e-08
60	chr1	1947291	1947291	1	*	hyper	1.23608e-06
65	chr1	1950299	1950299	1	*	hyper	1.38051e-08
70	chr1	1981551	1981551	1	*	hyper	8.8524e-07
74	chr1	1991234	1991234	1	*	hyper	1.2745e-07
79	chr1	2002367	2002367	1	*	hyper	5.94766e-08
84	chr1	2003508	2003508	1	*	hyper	2.26475e-09
89	chr1	2006142	2006142	1	*	hyper	1.31577e-06
94	chr1	2010235	2010235	1	*	hyper	2.13609e-09
99	chr1	2015518	2015518	1	*	hyper	6.56287e-08
101	chr1	2029872	2029872	1	*	hyper	3.21271e-10
103	chr1	2030475	2030475	1	*	hyper	3.83012e-06
105	chr1	2031992	2031992	1	*	hyper	1.1816e-09
107	chr1	2032340	2032340	1	*	hyper	5.44386e-06
109	chr1	2032824	2032824	1	*	hyper	7.40042e-06
112	chr1	2034952	2034952	1	*	hyper	6.47252e-08
115	chr1	2042170	2042170	1	*	hyper	1.625e-08
118	chr1	2042922	2042922	1	*	hyper	5.28628e-08
120	chr1	2044107	2044107	1	*	hyper	6.69038e-08
123	chr1	2045350	2045350	1	*	hyper	2.24242e-08
127	chr1	2058867	2058867	1	*	hyper	1.99456e-06
131	chr1	2073508	2073508	1	*	hyper	6.86977e-08
136	chr1	2089232	2089232	1	*	hyper	6.34453e-11
139	chr1	2090252	2090252	1	*	hyper	1.27256e-06
142	chr1	2091877	2091877	1	*	hyper	7.35027e-07
145	chr1	2091883	2091883	1	*	hyper	3.71866e-06
148	chr1	2107868	2107868	1	*	hyper	6.29138e-08
150	chr1	2148106	2148106	1	*	hyper	8.39014e-08
152	chr1	2149467	2149467	1	*	hyper	1.96241e-07
154	chr1	2153069	2153069	1	*	hyper	1.86996e-08
156	chr1	2153116	2153116	1	*	hyper	3.19325e-06
159	chr1	2198411	2198411	1	*	hypo	2.88345e-12
163	chr1	2198692	2198692	1	*	hyper	7.90351e-08
168	chr1	2207980	2207980	1	*	hypo	9.37918e-08
172	chr1	2208935	2208935	1	*	hyper	3.62546e-10
177	chr1	2220513	2220513	1	*	hyper	3.63861e-07
180	chr1	2226115	2226115	1	*	hyper	7.51148e-11
183	chr1	2226903	2226903	1	*	hyper	7.6462e-08
186	chr1	2231067	2231067	1	*	hyper	1.08796e-07
189	chr1	2614856	2614856	1	*	hyper	1.31906e-06
191	chr1	2632056	2632056	1	*	hyper	5.76154e-11
194	chr1	2633316	2633316	1	*	hyper	2.35837e-07
197	chr1	2643599	2643599	1	*	hyper	1.20642e-09
200	chr1	2645586	2645586	1	*	hyper	3.83384e-06
202	chr1	2655262	2655262	1	*	hyper	1.34716e-08
204	chr1	2673156	2673156	1	*	hyper	9.24885e-08
206	chr1	2692921	2692921	1	*	hyper	3.22959e-06
209	chr1	2700708	2700708	1	*	hyper	1.65986e-08
211	chr1	2726085	2726085	1	*	hyper	5.5442e-06
214	chr1	2747350	2747350	1	*	hyper	4.56203e-09
217	chr1	2752598	2752598	1	*	hyper	2.98593e-06
222	chr1	2754466	2754466	1	*	hyper	2.46795e-07
226	chr1	2762245	2762245	1	*	hyper	5.68971e-11
230	chr1	2805069	2805069	1	*	hyper	1.2255e-07
235	chr1	2808067	2808067	1	*	hyper	1.69949e-06
240	chr1	2869128	2869128	1	*	hyper	6.44e-11
244	chr1	2878392	2878392	1	*	hyper	6.87689e-06
248	chr1	3001353	3001353	1	*	hyper	4.78939e-07
253	chr1	3006326	3006326	1	*	hyper	7.74301e-08
257	chr1	3007585	3007585	1	*	hyper	3.10863e-07
262	chr1	3011327	3011327	1	*	hyper	4.1116e-11
266	chr1	3011546	3011546	1	*	hyper	2.92834e-09
270	chr1	3012081	3012081	1	*	hyper	4.57714e-11
275	chr1	3012690	3012690	1	*	hyper	3.09268e-09
279	chr1	3013418	3013418	1	*	hyper	2.907e-08
283	chr1	3018083	3018083	1	*	hyper	6.43828e-14
288	chr1	3018264	3018264	1	*	hyper	4.96672e-08
293	chr1	3058687	3058687	1	*	hyper	3.82978e-08
297	chr1	3286762	3286762	1	*	hypo	1.68041e-07
300	chr1	3728844	3728844	1	*	hypo	5.69658e-10
303	chr1	3751049	3751049	1	*	hyper	5.76914e-10
306	chr1	3941416	3941416	1	*	hyper	4.74417e-06
308	chr1	4142969	4142969	1	*	hyper	1.7226e-06
311	chr1	4229756	4229756	1	*	hypo	1.2425e-10
314	chr1	4259016	4259016	1	*	hypo	1.06074e-10
316	chr1	4464536	4464536	1	*	hyper	1.48703e-06
319	chr1	4481801	4481801	1	*	hyper	3.64498e-07
322	chr1	4482638	4482638	1	*	hyper	3.04163e-06
325	chr1	4486391	4486391	1	*	hyper	2.09006e-07
327	chr1	4496544	4496544	1	*	hyper	5.1829e-08
330	chr1	4530976	4530976	1	*	hypo	4.94294e-08
333	chr1	4530996	4530996	1	*	hyper	3.8423e-07
336	chr1	4577032	4577032	1	*	hypo	1.10159e-06
339	chr1	4577267	4577267	1	*	hyper	4.10812e-06
342	chr1	4579151	4579151	1	*	hyper	4.49535e-06
345	chr1	4705646	4705646	1	*	hyper	1.28534e-06
348	chr1	4766190	4766190	1	*	hypo	3.86597e-10
350	chr1	5060064	5060064	1	*	hyper	1.35299e-06
353	chr1	5064064	5064064	1	*	hyper	1.3552e-13
355	chr1	5087213	5087213	1	*	hyper	1.78085e-06
358	chr1	5095647	5095647	1	*	hyper	3.8082e-07
361	chr1	5105986	5105986	1	*	hypo	7.68713e-08
363	chr1	5386458	5386458	1	*	hypo	4.21429e-10
366	chr1	5391053	5391053	1	*	hyper	2.44687e-07
369	chr1	5396024	5396024	1	*	hyper	5.82289e-09
371	chr1	5397197	5397197	1	*	hyper	4.97864e-06
373	chr1	5400531	5400531	1	*	hyper	2.93277e-06
376	chr1	5769171	5769171	1	*	hyper	1.35737e-07
379	chr1	5772512	5772512	1	*	hyper	1.22032e-07
383	chr1	5774651	5774651	1	*	hyper	1.19637e-07
385	chr1	5784086	5784086	1	*	hyper	2.67279e-10
388	chr1	5790151	5790151	1	*	hyper	5.40256e-08
391	chr1	5790970	5790970	1	*	hyper	6.39958e-09
394	chr1	5791142	5791142	1	*	hyper	5.54435e-08
397	chr1	5791162	5791162	1	*	hyper	1.08236e-09
400	chr1	6249410	6249410	1	*	hyper	2.72387e-06
404	chr1	6332268	6332268	1	*	hypo	1.64418e-06
408	chr1	6382820	6382820	1	*	hypo	8.66247e-06
413	chr1	6392618	6392618	1	*	hyper	1.23457e-06
418	chr1	6442006	6442006	1	*	hyper	3.9812e-07
422	chr1	6442031	6442031	1	*	hyper	1.66296e-06
426	chr1	6442711	6442711	1	*	hyper	3.15624e-07
431	chr1	6661019	6661019	1	*	hypo	3.98856e-06
433	chr1	6694423	6694423	1	*	hypo	6.43844e-08
435	chr1	6967610	6967610	1	*	hyper	1.54872e-07
438	chr1	6969023	6969023	1	*	hyper	2.24877e-08
441	chr1	7002534	7002534	1	*	hypo	3.22659e-06
443	chr1	7618064	7618064	1	*	hyper	1.59022e-06
445	chr1	7762765	7762765	1	*	hyper	2.97887e-06
448	chr1	7885784	7885784	1	*	hyper	1.68617e-07
451	chr1	7912628	7912628	1	*	hypo	4.61101e-06
453	chr1	7964525	7964525	1	*	hyper	8.12134e-07
456	chr1	8016304	8016304	1	*	hyper	1.30402e-06
459	chr1	8093401	8093401	1	*	hypo	8.48112e-06
462	chr1	8352578	8352578	1	*	hypo	2.70889e-16
465	chr1	8356257	8356257	1	*	hypo	2.00012e-10
468	chr1	8357903	8357903	1	*	hypo	3.56622e-07
471	chr1	8415850	8415850	1	*	hypo	7.86562e-08
473	chr1	8425477	8425477	1	*	hypo	4.2724e-06
476	chr1	8486799	8486799	1	*	hypo	8.11509e-08
478	chr1	8489905	8489905	1	*	hypo	1.81911e-07
480	chr1	8493430	8493430	1	*	hypo	2.27994e-07
483	chr1	8661748	8661748	1	*	hyper	9.14531e-07
486	chr1	8804327	8804327	1	*	hypo	5.16716e-10
489	chr1	8859603	8859603	1	*	hypo	8.65131e-08
492	chr1	8888848	8888848	1	*	hypo	1.54926e-07
495	chr1	8937483	8937483	1	*	hypo	3.69922e-07
498	chr1	9039056	9039056	1	*	hyper	3.8684e-10
501	chr1	9190499	9190499	1	*	hyper	7.95264e-08
503	chr1	9229309	9229309	1	*	hypo	2.15993e-06
505	chr1	9257584	9257584	1	*	hypo	2.33435e-07
507	chr1	9271392	9271392	1	*	hypo	2.11486e-07
509	chr1	9273553	9273553	1	*	hypo	4.68996e-11
512	chr1	9277432	9277432	1	*	hypo	4.93756e-09
515	chr1	9405452	9405452	1	*	hypo	1.33171e-06
518	chr1	9516294	9516294	1	*	hyper	5.36202e-06
521	chr1	9561453	9561453	1	*	hypo	4.79837e-06
523	chr1	9598578	9598578	1	*	hypo	2.559e-06
525	chr1	9661793	9661793	1	*	hyper	8.05108e-07
527	chr1	9683080	9683080	1	*	hyper	2.0632e-09
529	chr1	9684093	9684093	1	*	hyper	1.13154e-07
532	chr1	9698116	9698116	1	*	hyper	1.26596e-09
534	chr1	9710662	9710662	1	*	hyper	2.58909e-07
537	chr1	9723665	9723665	1	*	hyper	5.76337e-07
539	chr1	9725673	9725673	1	*	hyper	2.44796e-07
542	chr1	9736090	9736090	1	*	hyper	2.23932e-06
544	chr1	9753239	9753239	1	*	hyper	4.87439e-06
547	chr1	9754290	9754290	1	*	hyper	1.92154e-07
549	chr1	9761542	9761542	1	*	hyper	9.24391e-08
552	chr1	9841921	9841921	1	*	hyper	2.41669e-06
555	chr1	10015772	10015772	1	*	hypo	5.03596e-07
558	chr1	10072958	10072958	1	*	hyper	5.00708e-06
561	chr1	10074453	10074453	1	*	hyper	3.89784e-06
564	chr1	10082821	10082821	1	*	hyper	2.44591e-08
566	chr1	10108384	10108384	1	*	hyper	7.05253e-08
569	chr1	10113565	10113565	1	*	hyper	8.38599e-07
572	chr1	10136147	10136147	1	*	hyper	5.19122e-06
575	chr1	10137911	10137911	1	*	hyper	7.08254e-06
578	chr1	10148297	10148297	1	*	hyper	6.16193e-06
581	chr1	10149970	10149970	1	*	hyper	1.85598e-08
584	chr1	10161968	10161968	1	*	hyper	4.21619e-06
587	chr1	10213511	10213511	1	*	hyper	5.02728e-08
589	chr1	10217619	10217619	1	*	hyper	6.40778e-10
591	chr1	10218228	10218228	1	*	hyper	2.2315e-11
594	chr1	10219038	10219038	1	*	hyper	1.12428e-06
596	chr1	10247790	10247790	1	*	hypo	7.10197e-10
601	chr1	10263971	10263971	1	*	hypo	1.5685e-07
606	chr1	10266272	10266272	1	*	hypo	3.11569e-06
610	chr1	10317220	10317220	1	*	hypo	1.12673e-07
615	chr1	10318037	10318037	1	*	hypo	5.2335e-07
620	chr1	10318678	10318678	1	*	hypo	1.67431e-07
625	chr1	10379316	10379316	1	*	hypo	4.03546e-07
629	chr1	10402551	10402551	1	*	hypo	4.29893e-08
633	chr1	10513578	10513578	1	*	hyper	6.93106e-08
637	chr1	10525142	10525142	1	*	hypo	8.39553e-09
641	chr1	10607269	10607269	1	*	hyper	9.61634e-09
644	chr1	10614981	10614981	1	*	hyper	8.19915e-09
647	chr1	10641583	10641583	1	*	hyper	5.49967e-07
650	chr1	10643922	10643922	1	*	hypo	8.66151e-06
652	chr1	10681041	10681041	1	*	hypo	1.1111e-06
657	chr1	10727934	10727934	1	*	hyper	8.51394e-09
662	chr1	10749464	10749464	1	*	hyper	4.07685e-06
666	chr1	10789024	10789024	1	*	hyper	2.28153e-08
669	chr1	10795337	10795337	1	*	hyper	1.4177e-06
672	chr1	11054833	11054833	1	*	hypo	2.75314e-06
674	chr1	11362133	11362133	1	*	hypo	2.00822e-08
677	chr1	11413465	11413465	1	*	hypo	2.29849e-06
680	chr1	11416505	11416505	1	*	hyper	1.36958e-06
682	chr1	11449226	11449226	1	*	hypo	3.93325e-09
684	chr1	11465663	11465663	1	*	hypo	1.11131e-07
686	chr1	11566237	11566237	1	*	hypo	4.00552e-07
688	chr1	11721473	11721473	1	*	hypo	4.54974e-06
690	chr1	11724083	11724083	1	*	hypo	2.88583e-06
692	chr1	11815377	11815377	1	*	hypo	1.88612e-06
695	chr1	11816734	11816734	1	*	hypo	8.04709e-07
697	chr1	11823320	11823320	1	*	hyper	1.83576e-06
699	chr1	11847750	11847750	1	*	hyper	4.14942e-06
701	chr1	11952171	11952171	1	*	hyper	5.61665e-07
703	chr1	12483361	12483361	1	*	hypo	3.13094e-06
706	chr1	12490718	12490718	1	*	hypo	3.38141e-08
709	chr1	12710899	12710899	1	*	hypo	3.64498e-07
711	chr1	12721822	12721822	1	*	hypo	8.59389e-06
713	chr1	12799674	12799674	1	*	hypo	6.38899e-09
715	chr1	12881471	12881471	1	*	hypo	4.68538e-06
718	chr1	13021936	13021936	1	*	hypo	2.36111e-06
720	chr1	13145628	13145628	1	*	hyper	9.43777e-07
723	chr1	13186716	13186716	1	*	hypo	1.83699e-07
726	chr1	13338790	13338790	1	*	hypo	2.41956e-06
728	chr1	13770677	13770677	1	*	hyper	5.7276e-06
730	chr1	13819864	13819864	1	*	hypo	1.71685e-06
733	chr1	13920921	13920921	1	*	hyper	2.60781e-06
736	chr1	14139019	14139019	1	*	hypo	1.04073e-07
738	chr1	14565068	14565068	1	*	hyper	4.60783e-08
740	chr1	14775233	14775233	1	*	hyper	8.20289e-06
742	chr1	14782059	14782059	1	*	hyper	2.81087e-06
744	chr1	14798988	14798988	1	*	hyper	6.22312e-06
747	chr1	14804592	14804592	1	*	hyper	4.68877e-07
749	chr1	15539646	15539646	1	*	hypo	5.72281e-10
752	chr1	15558432	15558432	1	*	hypo	4.35758e-07
754	chr1	15559292	15559292	1	*	hypo	4.86219e-06
756	chr1	15562627	15562627	1	*	hyper	1.39471e-06
758	chr1	15622927	15622927	1	*	hypo	4.79305e-09
761	chr1	15855862	15855862	1	*	hypo	2.12408e-07
763	chr1	15859566	15859566	1	*	hypo	2.03507e-06
766	chr1	15862393	15862393	1	*	hypo	5.09172e-06
769	chr1	15867529	15867529	1	*	hypo	1.02401e-06
771	chr1	15895947	15895947	1	*	hypo	1.55904e-06
774	chr1	16038205	16038205	1	*	hypo	2.04339e-07
776	chr1	16038975	16038975	1	*	hypo	1.35861e-08
779	chr1	16051784	16051784	1	*	hypo	3.11001e-13
781	chr1	16061886	16061886	1	*	hyper	2.11552e-07
784	chr1	16311060	16311060	1	*	hypo	5.44521e-06
786	chr1	16839876	16839876	1	*	hypo	1.4505e-07
788	chr1	16846135	16846135	1	*	hypo	4.44065e-07
790	chr1	18133311	18133311	1	*	hypo	6.60148e-07
793	chr1	18185688	18185688	1	*	hypo	6.88874e-10
796	chr1	18668133	18668133	1	*	hypo	1.08456e-08
801	chr1	18772511	18772511	1	*	hypo	5.4506e-12
804	chr1	18930137	18930137	1	*	hypo	1.58564e-07
807	chr1	18942821	18942821	1	*	hypo	2.03856e-08
809	chr1	18944290	18944290	1	*	hypo	3.73853e-07
812	chr1	18984256	18984256	1	*	hypo	1.36925e-08
814	chr1	19034490	19034490	1	*	hypo	5.19274e-10
817	chr1	19088146	19088146	1	*	hypo	4.06013e-07
820	chr1	19222806	19222806	1	*	hypo	4.76091e-14
823	chr1	19239994	19239994	1	*	hypo	1.43023e-06
827	chr1	19262746	19262746	1	*	hypo	5.13061e-09
829	chr1	19268458	19268458	1	*	hypo	4.78236e-08
832	chr1	19421807	19421807	1	*	hyper	7.47896e-09
837	chr1	19531861	19531861	1	*	hypo	1.05408e-06
840	chr1	19535993	19535993	1	*	hypo	1.83923e-10
843	chr1	20330954	20330954	1	*	hypo	1.14295e-08
846	chr1	20368510	20368510	1	*	hypo	6.42932e-08
849	chr1	23946418	23946418	1	*	hyper	1.17456e-06
852	chr1	25000241	25000241	1	*	hypo	2.00302e-08
855	chr1	27111888	27111888	1	*	hypo	1.88041e-06
859	chr1	27593113	27593113	1	*	hyper	1.06403e-06
861	chr1	28554631	28554631	1	*	hypo	5.57163e-07
863	chr1	28639152	28639152	1	*	hyper	2.42978e-06
865	chr1	29070793	29070793	1	*	hypo	7.08662e-07
868	chr1	29074597	29074597	1	*	hypo	6.31098e-09
870	chr1	29101426	29101426	1	*	hypo	2.23063e-08
872	chr1	29144751	29144751	1	*	hypo	9.29399e-08
877	chr1	29203537	29203537	1	*	hyper	5.12228e-07
881	chr1	29226198	29226198	1	*	hyper	7.56757e-11
885	chr1	29280359	29280359	1	*	hypo	8.06255e-07
889	chr1	29301961	29301961	1	*	hypo	1.27828e-08
894	chr1	29449823	29449823	1	*	hyper	3.93535e-08
897	chr1	29487225	29487225	1	*	hypo	1.00299e-07
900	chr1	29529706	29529706	1	*	hyper	1.75511e-06
903	chr1	29529790	29529790	1	*	hyper	2.25735e-06
905	chr1	29530012	29530012	1	*	hyper	1.70624e-07
907	chr1	29535045	29535045	1	*	hypo	2.52218e-06
909	chr1	29543149	29543149	1	*	hypo	1.11297e-11
911	chr1	29722523	29722523	1	*	hyper	5.58721e-09
914	chr1	29773158	29773158	1	*	hyper	1.00967e-06
917	chr1	29877304	29877304	1	*	hyper	1.98265e-08
919	chr1	29884288	29884288	1	*	hyper	2.15762e-06
921	chr1	29962052	29962052	1	*	hyper	6.26767e-09
924	chr1	30143583	30143583	1	*	hyper	4.01678e-07
927	chr1	30445217	30445217	1	*	hypo	5.10704e-09
930	chr1	30724342	30724342	1	*	hyper	1.86388e-08
932	chr1	30887600	30887600	1	*	hyper	3.17814e-09
935	chr1	30888723	30888723	1	*	hypo	1.71393e-07
938	chr1	30936720	30936720	1	*	hyper	3.83822e-07
941	chr1	31043007	31043007	1	*	hypo	6.5486e-09
943	chr1	31106284	31106284	1	*	hypo	8.87451e-07
946	chr1	31273378	31273378	1	*	hypo	4.21662e-07
948	chr1	31306547	31306547	1	*	hypo	1.68598e-07
951	chr1	31672529	31672529	1	*	hyper	5.09564e-07
953	chr1	31959145	31959145	1	*	hyper	3.88629e-07
956	chr1	33020727	33020727	1	*	hyper	5.41382e-08
958	chr1	33242327	33242327	1	*	hyper	3.33197e-08
960	chr1	33798632	33798632	1	*	hypo	4.13902e-09
962	chr1	34132673	34132673	1	*	hyper	2.35674e-07
964	chr1	34764026	34764026	1	*	hypo	1.03642e-11
966	chr1	34870310	34870310	1	*	hyper	1.827e-08
969	chr1	34903845	34903845	1	*	hyper	2.42592e-09
972	chr1	34906368	34906368	1	*	hyper	1.97317e-07
974	chr1	34907174	34907174	1	*	hyper	1.67026e-06
976	chr1	34960196	34960196	1	*	hyper	1.45833e-06
979	chr1	34979808	34979808	1	*	hypo	3.90952e-07
982	chr1	35001940	35001940	1	*	hypo	1.5302e-08
985	chr1	36085998	36085998	1	*	hyper	7.02869e-07
988	chr1	36108499	36108499	1	*	hyper	1.92907e-08
991	chr1	36480632	36480632	1	*	hyper	1.9163e-06
993	chr1	36482357	36482357	1	*	hyper	6.91093e-07
996	chr1	36483150	36483150	1	*	hyper	6.37197e-08
999	chr1	37269791	37269791	1	*	hypo	1.71879e-06
1003	chr1	37716185	37716185	1	*	hyper	2.55853e-07
1006	chr1	38187875	38187875	1	*	hyper	1.92204e-10
1008	chr1	38666569	38666569	1	*	hyper	9.50338e-07
1011	chr1	39433019	39433019	1	*	hypo	4.01029e-07
1014	chr1	40031582	40031582	1	*	hyper	4.04561e-10
1017	chr1	40196516	40196516	1	*	hyper	7.48848e-07
1020	chr1	40430518	40430518	1	*	hyper	1.45905e-06
1023	chr1	41376767	41376767	1	*	hyper	1.64706e-07
1025	chr1	41429870	41429870	1	*	hyper	2.31525e-07
1027	chr1	43696612	43696612	1	*	hyper	3.29426e-08
1030	chr1	43777640	43777640	1	*	hyper	3.73639e-08
1032	chr1	43926162	43926162	1	*	hypo	3.31973e-07
1036	chr1	45485585	45485585	1	*	hypo	1.54676e-07
1039	chr1	45665429	45665429	1	*	hypo	1.52613e-07
1041	chr1	50328521	50328521	1	*	hypo	6.09929e-08
1045	chr1	51784224	51784224	1	*	hypo	1.2521e-08
1047	chr1	52692978	52692978	1	*	hypo	1.78803e-07
1050	chr1	54471937	54471937	1	*	hypo	4.72221e-07
1053	chr1	54832209	54832209	1	*	hyper	2.92309e-08
1055	chr1	54857050	54857050	1	*	hyper	2.37196e-07
1058	chr1	55033946	55033946	1	*	hyper	2.7633e-08
1061	chr1	55610710	55610710	1	*	hypo	6.8876e-09
1064	chr1	55614001	55614001	1	*	hyper	7.58779e-11
1067	chr1	55638755	55638755	1	*	hyper	7.09657e-08
1069	chr1	55681850	55681850	1	*	hyper	6.8308e-07
1072	chr1	55709824	55709824	1	*	hyper	1.0278e-08
1074	chr1	57279933	57279933	1	*	hypo	4.71566e-08
1077	chr1	57324302	57324302	1	*	hypo	6.06776e-07
1082	chr1	57437618	57437618	1	*	hypo	1.10478e-06
1085	chr1	58154280	58154280	1	*	hypo	3.33344e-08
1090	chr1	58156148	58156148	1	*	hypo	1.04179e-06
1094	chr1	58161271	58161271	1	*	hypo	1.61683e-07
1099	chr1	58163810	58163810	1	*	hyper	2.26475e-09
1103	chr1	58270790	58270790	1	*	hyper	1.15085e-08
1107	chr1	58611799	58611799	1	*	hyper	8.76795e-07
1111	chr1	58912538	58912538	1	*	hyper	1.82454e-10
1114	chr1	58913596	58913596	1	*	hyper	4.8951e-09
1117	chr1	58991706	58991706	1	*	hyper	1.9192e-08
1119	chr1	59007253	59007253	1	*	hyper	1.46911e-06
1121	chr1	59019671	59019671	1	*	hyper	3.61418e-07
1123	chr1	59115458	59115458	1	*	hyper	1.31927e-09
1125	chr1	59456294	59456294	1	*	hypo	1.20324e-12
1128	chr1	59517351	59517351	1	*	hyper	3.84008e-07
1131	chr1	59782736	59782736	1	*	hyper	1.53581e-06
1134	chr1	59793302	59793302	1	*	hypo	2.6619e-10
1136	chr1	59862513	59862513	1	*	hypo	2.29078e-11
1139	chr1	59866221	59866221	1	*	hypo	1.49954e-07
1142	chr1	59866651	59866651	1	*	hypo	4.64395e-10
1144	chr1	61319186	61319186	1	*	hypo	1.20411e-06
1147	chr1	61320179	61320179	1	*	hyper	5.39567e-07
1149	chr1	62139510	62139510	1	*	hypo	2.02443e-08
1152	chr1	62194753	62194753	1	*	hypo	9.77464e-08
1155	chr1	62422203	62422203	1	*	hyper	3.2607e-07
1158	chr1	62630448	62630448	1	*	hypo	1.9377e-06
1160	chr1	62663328	62663328	1	*	hypo	1.72249e-06
1163	chr1	62678845	62678845	1	*	hypo	1.34666e-06
1165	chr1	62680351	62680351	1	*	hypo	1.15941e-06
1167	chr1	62701462	62701462	1	*	hyper	4.64203e-07
1171	chr1	62781092	62781092	1	*	hypo	5.57451e-07
1173	chr1	63542248	63542248	1	*	hyper	7.92109e-07
1176	chr1	64126372	64126372	1	*	hyper	1.87142e-07
1181	chr1	64177851	64177851	1	*	hyper	2.75356e-07
1186	chr1	64234095	64234095	1	*	hyper	1.14452e-06
1191	chr1	64529554	64529554	1	*	hyper	1.08116e-06
1194	chr1	64938581	64938581	1	*	hyper	1.10827e-08
1197	chr1	65814035	65814035	1	*	hypo	1.76214e-07
1202	chr1	67066509	67066509	1	*	hypo	1.69801e-06
1207	chr1	67076333	67076333	1	*	hypo	4.34756e-07
1212	chr1	67356644	67356644	1	*	hyper	2.78615e-07
1214	chr1	67429630	67429630	1	*	hyper	9.03643e-07
1218	chr1	67856957	67856957	1	*	hyper	4.02751e-07
1220	chr1	67983598	67983598	1	*	hyper	1.0376e-06
1224	chr1	68052281	68052281	1	*	hyper	2.37748e-07
1229	chr1	68263460	68263460	1	*	hypo	1.53726e-06
1232	chr1	69022431	69022431	1	*	hypo	1.29834e-06
1237	chr1	69024646	69024646	1	*	hypo	3.55693e-07
1242	chr1	69024701	69024701	1	*	hypo	2.00822e-08
1247	chr1	69025749	69025749	1	*	hypo	3.87919e-11
1252	chr1	69027622	69027622	1	*	hypo	3.83419e-11
1256	chr1	69031689	69031689	1	*	hypo	1.99567e-09
1261	chr1	69041492	69041492	1	*	hypo	1.60681e-09
1265	chr1	69052734	69052734	1	*	hypo	1.78535e-11
1269	chr1	69053712	69053712	1	*	hypo	2.91289e-14
1274	chr1	69055601	69055601	1	*	hypo	4.26466e-11
1278	chr1	69066987	69066987	1	*	hypo	3.21832e-09
1282	chr1	69137661	69137661	1	*	hypo	1.75337e-09
1287	chr1	69191185	69191185	1	*	hypo	3.27634e-10
1289	chr1	69219644	69219644	1	*	hypo	6.97979e-07
1294	chr1	69224306	69224306	1	*	hypo	1.19928e-08
1298	chr1	69292435	69292435	1	*	hyper	6.60182e-08
1302	chr1	69550259	69550259	1	*	hyper	1.2331e-06
1304	chr1	70187779	70187779	1	*	hypo	3.77975e-07
1308	chr1	70485291	70485291	1	*	hypo	4.35866e-07
1310	chr1	70637583	70637583	1	*	hypo	9.96026e-07
1313	chr1	70794423	70794423	1	*	hyper	1.56762e-08
1318	chr1	70798290	70798290	1	*	hyper	1.47867e-06
1323	chr1	70804442	70804442	1	*	hyper	9.57386e-08
1325	chr1	70808589	70808589	1	*	hyper	9.30209e-08
1328	chr1	71108276	71108276	1	*	hyper	1.57921e-09
1333	chr1	71108880	71108880	1	*	hyper	2.52099e-08
1338	chr1	71109728	71109728	1	*	hyper	4.30397e-08
1343	chr1	71118055	71118055	1	*	hyper	3.06441e-09
1346	chr1	71119248	71119248	1	*	hyper	9.48568e-07
1349	chr1	71130780	71130780	1	*	hyper	4.18791e-07
1351	chr1	72612868	72612868	1	*	hypo	1.79833e-06
1354	chr1	73089629	73089629	1	*	hypo	8.42208e-07
1358	chr1	73130865	73130865	1	*	hypo	8.08334e-07
1361	chr1	73188719	73188719	1	*	hypo	1.49501e-08
1364	chr1	74068371	74068371	1	*	hyper	1.49346e-06
1366	chr1	74212892	74212892	1	*	hypo	1.20973e-07
1369	chr1	74523004	74523004	1	*	hyper	5.90376e-07
1373	chr1	74611931	74611931	1	*	hyper	2.69074e-08
1376	chr1	74688166	74688166	1	*	hypo	1.84293e-10
1380	chr1	74689390	74689390	1	*	hypo	5.04699e-13
1384	chr1	74692212	74692212	1	*	hyper	2.23198e-07
1389	chr1	74692979	74692979	1	*	hypo	1.9868e-07
1394	chr1	74799628	74799628	1	*	hyper	4.55948e-07
1398	chr1	74800509	74800509	1	*	hyper	1.38089e-06
1403	chr1	75431059	75431059	1	*	hyper	1.10865e-06
1406	chr1	75449341	75449341	1	*	hyper	4.73962e-07
1408	chr1	75451989	75451989	1	*	hyper	1.11848e-06
1411	chr1	75457029	75457029	1	*	hyper	3.85394e-07
1414	chr1	75472301	75472301	1	*	hyper	9.57598e-07
1416	chr1	75775792	75775792	1	*	hyper	1.74695e-08
1419	chr1	76049156	76049156	1	*	hypo	1.48503e-06
1421	chr1	76199641	76199641	1	*	hyper	2.46745e-07
1423	chr1	76247032	76247032	1	*	hypo	7.46813e-07
1426	chr1	76257651	76257651	1	*	hypo	2.35606e-08
1428	chr1	76284284	76284284	1	*	hypo	1.92641e-06
1430	chr1	76286686	76286686	1	*	hypo	1.67903e-06
1432	chr1	76296900	76296900	1	*	hypo	2.69407e-08
1435	chr1	76655411	76655411	1	*	hyper	2.39531e-06
1440	chr1	76656215	76656215	1	*	hyper	1.93032e-06
1445	chr1	76814986	76814986	1	*	hypo	3.4164e-07
1447	chr1	77075239	77075239	1	*	hypo	3.76849e-10
1449	chr1	77578117	77578117	1	*	hypo	1.70583e-06
1453	chr1	78701310	78701310	1	*	hypo	1.10905e-07
1457	chr1	78932928	78932928	1	*	hypo	7.24361e-07
1461	chr1	79184196	79184196	1	*	hyper	6.03811e-10
1463	chr1	79186191	79186191	1	*	hyper	7.33695e-07
1465	chr1	80108724	80108724	1	*	hyper	7.47569e-07
1468	chr1	80468785	80468785	1	*	hyper	1.96241e-07
1473	chr1	81100689	81100689	1	*	hyper	2.83883e-07
1475	chr1	81398975	81398975	1	*	hyper	6.41094e-07
1477	chr1	81994597	81994597	1	*	hyper	6.7009e-07
1482	chr1	82252314	82252314	1	*	hypo	3.36515e-07
1485	chr1	82868493	82868493	1	*	hyper	9.14041e-08
1487	chr1	83604552	83604552	1	*	hyper	7.66781e-08
1489	chr1	83689873	83689873	1	*	hyper	4.52072e-07
1491	chr1	83697421	83697421	1	*	hyper	6.3463e-07
1494	chr1	84169087	84169087	1	*	hyper	8.81106e-07
1496	chr1	84198201	84198201	1	*	hypo	8.44137e-10
1499	chr1	84236958	84236958	1	*	hypo	4.34887e-09
1502	chr1	84238615	84238615	1	*	hypo	9.45608e-08
1504	chr1	84265266	84265266	1	*	hyper	2.53112e-09
1507	chr1	84294439	84294439	1	*	hyper	2.82346e-08
1510	chr1	84593619	84593619	1	*	hyper	2.3684e-07
1513	chr1	84595777	84595777	1	*	hyper	6.07233e-07
1516	chr1	84601097	84601097	1	*	hyper	1.02875e-06
1519	chr1	85687128	85687128	1	*	hypo	5.58289e-08
1522	chr1	85803249	85803249	1	*	hypo	2.49934e-07
1524	chr1	86184158	86184158	1	*	hyper	6.73903e-07
1527	chr1	88386575	88386575	1	*	hypo	3.89665e-08
1532	chr1	88413384	88413384	1	*	hyper	7.00224e-09
1537	chr1	88431320	88431320	1	*	hyper	1.16371e-06
1541	chr1	88432491	88432491	1	*	hyper	4.88879e-17
1545	chr1	89743282	89743282	1	*	hypo	3.9669e-07
1547	chr1	89829720	89829720	1	*	hypo	3.17936e-08
1549	chr1	90891672	90891672	1	*	hypo	1.1115e-06
1552	chr1	91118437	91118437	1	*	hyper	9.67368e-07
1555	chr1	91385661	91385661	1	*	hyper	5.85403e-07
1558	chr1	91418886	91418886	1	*	hyper	3.47167e-08
1561	chr1	92715572	92715572	1	*	hyper	1.53247e-07
1564	chr1	93122447	93122447	1	*	hypo	1.55315e-08
1566	chr1	93355101	93355101	1	*	hyper	1.64145e-07
1570	chr1	93368008	93368008	1	*	hyper	5.14507e-07
1574	chr1	94713046	94713046	1	*	hypo	1.7887e-07
1578	chr1	94766660	94766660	1	*	hypo	4.99149e-07
1583	chr1	94984337	94984337	1	*	hypo	4.3816e-07
1587	chr1	95259739	95259739	1	*	hypo	1.36133e-07
1591	chr1	95444455	95444455	1	*	hypo	1.86703e-07
1593	chr1	95643259	95643259	1	*	hypo	1.34435e-07
1595	chr1	96867762	96867762	1	*	hyper	3.41845e-07
1600	chr1	96874764	96874764	1	*	hyper	3.10617e-07
1604	chr1	98752332	98752332	1	*	hypo	6.94907e-07
1606	chr1	98902473	98902473	1	*	hyper	4.74955e-07
1609	chr1	99194785	99194785	1	*	hyper	6.98785e-07
1612	chr1	99204036	99204036	1	*	hyper	6.41094e-07
1614	chr1	99214580	99214580	1	*	hypo	1.1673e-07
1616	chr1	99532601	99532601	1	*	hyper	9.83336e-07
1618	chr1	99566082	99566082	1	*	hyper	1.70575e-06
1623	chr1	99569418	99569418	1	*	hyper	9.39912e-08
1627	chr1	99729764	99729764	1	*	hyper	2.1579e-06
1631	chr1	100024710	100024710	1	*	hypo	1.09013e-07
1635	chr1	100196443	100196443	1	*	hyper	3.64499e-07
1638	chr1	100318147	100318147	1	*	hypo	8.95065e-07
1640	chr1	100614620	100614620	1	*	hyper	6.25575e-07
1642	chr1	100836006	100836006	1	*	hyper	5.06508e-07
1645	chr1	101328535	101328535	1	*	hyper	4.88768e-08
1647	chr1	102148515	102148515	1	*	hyper	2.3206e-08
1650	chr1	102674743	102674743	1	*	hyper	1.42058e-06
1652	chr1	102717283	102717283	1	*	hypo	1.78394e-07
1655	chr1	102749044	102749044	1	*	hypo	4.76931e-07
1657	chr1	102803333	102803333	1	*	hypo	8.80089e-09
1660	chr1	102821643	102821643	1	*	hypo	1.48475e-11
1663	chr1	102826118	102826118	1	*	hypo	2.19176e-08
1665	chr1	102846881	102846881	1	*	hypo	6.59869e-08
1668	chr1	102850528	102850528	1	*	hypo	8.41357e-09
1671	chr1	102956120	102956120	1	*	hypo	3.4643e-08
1674	chr1	103575213	103575213	1	*	hypo	5.7279e-07
1677	chr1	104067971	104067971	1	*	hypo	2.55628e-07
1680	chr1	104179444	104179444	1	*	hypo	2.27268e-10
1683	chr1	104202092	104202092	1	*	hypo	3.04033e-07
1685	chr1	104963872	104963872	1	*	hypo	1.07137e-07
1687	chr1	105353183	105353183	1	*	hypo	9.25073e-07
1689	chr1	106067650	106067650	1	*	hypo	3.75623e-07
1691	chr1	107264457	107264457	1	*	hypo	2.61449e-07
1693	chr1	107299674	107299674	1	*	hyper	2.09008e-06
1696	chr1	107343029	107343029	1	*	hypo	8.57419e-07
1699	chr1	107545844	107545844	1	*	hypo	1.46013e-06
1701	chr1	107545881	107545881	1	*	hypo	7.52093e-09
1703	chr1	107823378	107823378	1	*	hyper	1.10865e-06
1705	chr1	108019160	108019160	1	*	hyper	2.84136e-07
1708	chr1	108116019	108116019	1	*	hyper	3.85625e-07
1710	chr1	108236603	108236603	1	*	hyper	3.2421e-06
1712	chr1	108365174	108365174	1	*	hyper	1.0203e-10
1715	chr1	108500144	108500144	1	*	hyper	1.27236e-06
1718	chr1	108561109	108561109	1	*	hyper	4.97864e-06
1721	chr1	108669351	108669351	1	*	hypo	8.80236e-07
1723	chr1	108675502	108675502	1	*	hypo	1.78313e-06
1725	chr1	108679535	108679535	1	*	hypo	2.44625e-07
1728	chr1	108767911	108767911	1	*	hypo	1.31415e-09
1731	chr1	108858973	108858973	1	*	hyper	6.91675e-09
1735	chr1	108877309	108877309	1	*	hyper	3.57801e-07
1740	chr1	108883741	108883741	1	*	hyper	6.46084e-08
1745	chr1	109977531	109977531	1	*	hypo	4.60319e-07
1748	chr1	110279809	110279809	1	*	hyper	4.87439e-06
1751	chr1	110427814	110427814	1	*	hypo	6.13707e-07
1754	chr1	110434474	110434474	1	*	hypo	1.51377e-06
1757	chr1	110479204	110479204	1	*	hypo	3.43705e-08
1759	chr1	110479547	110479547	1	*	hypo	1.89126e-07
1761	chr1	110731581	110731581	1	*	hypo	1.1971e-06
1763	chr1	110812636	110812636	1	*	hyper	2.95037e-06
1765	chr1	111342035	111342035	1	*	hypo	1.12926e-07
1769	chr1	111380573	111380573	1	*	hyper	3.97069e-07
1773	chr1	111699886	111699886	1	*	hypo	1.83777e-09
1775	chr1	111723550	111723550	1	*	hypo	4.46942e-06
1777	chr1	111750329	111750329	1	*	hyper	3.73869e-07
1782	chr1	111752803	111752803	1	*	hyper	4.47874e-06
1787	chr1	111759278	111759278	1	*	hypo	1.43998e-10
1792	chr1	111760209	111760209	1	*	hypo	7.04895e-07
1797	chr1	111764917	111764917	1	*	hypo	1.29806e-10
1802	chr1	111768572	111768572	1	*	hyper	5.42019e-10
1806	chr1	111770574	111770574	1	*	hyper	7.29739e-13
1810	chr1	111771316	111771316	1	*	hyper	1.23413e-07
1815	chr1	111789742	111789742	1	*	hyper	1.08594e-06
1819	chr1	111790746	111790746	1	*	hypo	3.57141e-06
1824	chr1	111791436	111791436	1	*	hyper	2.10711e-07
1829	chr1	111826689	111826689	1	*	hypo	4.06634e-08
1832	chr1	111862085	111862085	1	*	hyper	2.74533e-06
1835	chr1	111919566	111919566	1	*	hypo	1.4397e-12
1837	chr1	111960793	111960793	1	*	hypo	5.37772e-07
1839	chr1	111962347	111962347	1	*	hypo	9.28117e-09
1841	chr1	111963109	111963109	1	*	hypo	2.40543e-09
1844	chr1	111965834	111965834	1	*	hypo	1.11944e-07
1846	chr1	111970827	111970827	1	*	hypo	1.52229e-12
1849	chr1	112082433	112082433	1	*	hypo	3.05069e-06
1852	chr1	112083809	112083809	1	*	hyper	3.85216e-06
1854	chr1	112161290	112161290	1	*	hypo	8.08864e-07
1856	chr1	112166800	112166800	1	*	hypo	6.35001e-10
1858	chr1	112203347	112203347	1	*	hypo	2.07851e-08
1861	chr1	112226287	112226287	1	*	hyper	1.8297e-06
1864	chr1	112244455	112244455	1	*	hypo	1.19203e-06
1866	chr1	112251789	112251789	1	*	hypo	4.74059e-07
1869	chr1	112252728	112252728	1	*	hypo	8.78804e-08
1872	chr1	112253100	112253100	1	*	hypo	5.56711e-06
1874	chr1	112260946	112260946	1	*	hypo	8.64164e-13
1876	chr1	112261929	112261929	1	*	hypo	1.99686e-13
1878	chr1	112268867	112268867	1	*	hypo	6.19987e-13
1881	chr1	112300376	112300376	1	*	hypo	1.2134e-21
1884	chr1	112305685	112305685	1	*	hypo	8.15142e-12
1886	chr1	112306628	112306628	1	*	hypo	8.10358e-14
1888	chr1	112312617	112312617	1	*	hypo	3.97477e-11
1891	chr1	112312630	112312630	1	*	hypo	6.62467e-12
1894	chr1	112315133	112315133	1	*	hypo	8.77446e-07
1897	chr1	112344610	112344610	1	*	hypo	1.05811e-09
1900	chr1	112344861	112344861	1	*	hypo	2.7354e-09
1903	chr1	112350205	112350205	1	*	hypo	6.00513e-09
1906	chr1	112350558	112350558	1	*	hypo	2.71515e-08
1909	chr1	112382877	112382877	1	*	hyper	3.45956e-06
1912	chr1	112384639	112384639	1	*	hypo	4.69703e-09
1915	chr1	112495318	112495318	1	*	hypo	4.98194e-08
1919	chr1	112542065	112542065	1	*	hypo	1.81877e-06
1924	chr1	112569708	112569708	1	*	hypo	3.194e-07
1929	chr1	112590724	112590724	1	*	hypo	4.2941e-06
1933	chr1	112824961	112824961	1	*	hypo	3.49367e-06
1935	chr1	112851996	112851996	1	*	hypo	5.11155e-06
1938	chr1	112994551	112994551	1	*	hypo	2.61532e-12
1941	chr1	112997826	112997826	1	*	hypo	3.44986e-10
1943	chr1	113150322	113150322	1	*	hypo	4.66042e-07
1946	chr1	113429452	113429452	1	*	hypo	1.44915e-06
1951	chr1	113455461	113455461	1	*	hyper	4.9648e-07
1956	chr1	113835699	113835699	1	*	hypo	1.71165e-09
1958	chr1	113983740	113983740	1	*	hyper	3.12489e-07
1960	chr1	114130795	114130795	1	*	hyper	4.57625e-08
1962	chr1	114140602	114140602	1	*	hyper	4.64124e-07
1964	chr1	114148871	114148871	1	*	hyper	3.48399e-08
1967	chr1	114455634	114455634	1	*	hyper	6.23049e-08
1969	chr1	114514370	114514370	1	*	hypo	1.28088e-06
1971	chr1	114514435	114514435	1	*	hypo	4.27459e-09
1973	chr1	114514515	114514515	1	*	hypo	1.21894e-07
1975	chr1	115179383	115179383	1	*	hypo	2.52496e-08
1978	chr1	115551068	115551068	1	*	hyper	1.49949e-07
1980	chr1	116577372	116577372	1	*	hypo	1.9155e-07
1983	chr1	116796295	116796295	1	*	hypo	8.4401e-08
1990	chr1	116822742	116822742	1	*	hypo	1.55904e-06
1994	chr1	117902979	117902979	1	*	hyper	7.29615e-07
1997	chr1	118382610	118382610	1	*	hyper	2.00504e-07
1999	chr1	118519440	118519440	1	*	hypo	2.67135e-11
2004	chr1	118522664	118522664	1	*	hypo	1.87209e-08
2008	chr1	118530316	118530316	1	*	hyper	9.45829e-08
2012	chr1	118583000	118583000	1	*	hypo	2.27745e-12
2017	chr1	118978301	118978301	1	*	hypo	6.11083e-07
2022	chr1	119009433	119009433	1	*	hypo	1.68328e-10
2026	chr1	119009576	119009576	1	*	hypo	8.33884e-13
2030	chr1	119010633	119010633	1	*	hyper	7.12117e-11
2034	chr1	119015981	119015981	1	*	hyper	5.60876e-15
2039	chr1	119157928	119157928	1	*	hyper	1.23172e-06
2044	chr1	119169943	119169943	1	*	hyper	2.38183e-06
2048	chr1	119407317	119407317	1	*	hyper	6.347e-07
2050	chr1	119422035	119422035	1	*	hyper	8.04226e-08
2053	chr1	120440063	120440063	1	*	hypo	8.62129e-07
2055	chr1	120549348	120549348	1	*	hyper	4.79389e-07
2057	chr1	120561423	120561423	1	*	hypo	1.14462e-06
2059	chr1	120582067	120582067	1	*	hyper	1.4296e-07
2061	chr1	120584778	120584778	1	*	hypo	5.7209e-07
2063	chr1	120602176	120602176	1	*	hypo	9.83463e-07
2066	chr1	120706499	120706499	1	*	hypo	5.47655e-08
2068	chr1	120706553	120706553	1	*	hypo	3.70408e-11
2070	chr1	121003380	121003380	1	*	hyper	3.72432e-08
2072	chr1	121056657	121056657	1	*	hypo	5.26137e-07
2074	chr1	121215869	121215869	1	*	hypo	1.2365e-08
2076	chr1	121351182	121351182	1	*	hypo	5.112e-07
2078	chr1	121473205	121473205	1	*	hyper	3.83131e-07
2080	chr1	121534385	121534385	1	*	hypo	9.72135e-08
2083	chr1	121944699	121944699	1	*	hypo	4.05571e-07
2087	chr1	121958531	121958531	1	*	hyper	1.5098e-07
2091	chr1	122383469	122383469	1	*	hyper	2.23873e-07
2096	chr1	122385780	122385780	1	*	hyper	2.60475e-08
2100	chr1	122558363	122558363	1	*	hyper	4.49435e-06
2102	chr1	122579484	122579484	1	*	hyper	1.64145e-07
2105	chr1	122669496	122669496	1	*	hyper	7.31051e-06
2108	chr1	123118660	123118660	1	*	hyper	2.06374e-07
2111	chr1	123571892	123571892	1	*	hyper	7.57114e-06
2113	chr1	123648857	123648857	1	*	hyper	3.90874e-06
2116	chr1	123725337	123725337	1	*	hyper	6.77158e-06
2119	chr1	123990593	123990593	1	*	hypo	5.26495e-06
2122	chr1	124016010	124016010	1	*	hypo	7.18543e-07
2125	chr1	124303459	124303459	1	*	hyper	1.28256e-06
2127	chr1	124367012	124367012	1	*	hypo	4.15427e-06
2130	chr1	124588493	124588493	1	*	hypo	3.29514e-06
2133	chr1	124595789	124595789	1	*	hyper	3.54156e-07
2135	chr1	124878057	124878057	1	*	hyper	6.70535e-07
2139	chr1	124899942	124899942	1	*	hypo	1.29834e-06
2142	chr1	125003795	125003795	1	*	hypo	9.34422e-07
2145	chr1	125159355	125159355	1	*	hypo	6.00788e-06
2149	chr1	125468052	125468052	1	*	hyper	1.22217e-06
2154	chr1	125469329	125469329	1	*	hyper	2.1282e-11
2159	chr1	125475034	125475034	1	*	hyper	4.10721e-09
2164	chr1	125493065	125493065	1	*	hyper	7.48001e-06
2168	chr1	125499523	125499523	1	*	hyper	3.05903e-07
2173	chr1	125505875	125505875	1	*	hypo	1.21709e-06
2178	chr1	125506903	125506903	1	*	hyper	9.35646e-11
2183	chr1	125509760	125509760	1	*	hypo	1.6545e-09
2187	chr1	125526338	125526338	1	*	hyper	7.80969e-12
2191	chr1	125557621	125557621	1	*	hyper	5.86284e-10
2195	chr1	125570742	125570742	1	*	hypo	7.05141e-09
2200	chr1	125577524	125577524	1	*	hypo	9.54852e-07
2205	chr1	125607100	125607100	1	*	hypo	1.61176e-08
2209	chr1	125659401	125659401	1	*	hypo	7.58938e-08
2213	chr1	125681851	125681851	1	*	hyper	5.97679e-06
2217	chr1	125682194	125682194	1	*	hyper	1.47163e-07
2221	chr1	125699131	125699131	1	*	hyper	2.28555e-06
2225	chr1	125728137	125728137	1	*	hypo	7.06161e-07
2228	chr1	125743808	125743808	1	*	hyper	1.95598e-06
2231	chr1	126111582	126111582	1	*	hyper	6.23949e-06
2234	chr1	126156097	126156097	1	*	hyper	2.74236e-08
2239	chr1	126156140	126156140	1	*	hyper	3.09725e-08
2244	chr1	126157106	126157106	1	*	hyper	2.84975e-07
2249	chr1	126163383	126163383	1	*	hyper	2.48453e-06
2254	chr1	126183160	126183160	1	*	hyper	7.08402e-10
2259	chr1	126282634	126282634	1	*	hypo	1.7349e-07
2264	chr1	126297068	126297068	1	*	hypo	4.71189e-10
2269	chr1	126332118	126332118	1	*	hyper	2.75802e-10
2273	chr1	126999646	126999646	1	*	hyper	5.18579e-06
2278	chr1	127076294	127076294	1	*	hyper	7.90733e-10
2283	chr1	127206742	127206742	1	*	hyper	8.20606e-07
2286	chr1	127233960	127233960	1	*	hypo	1.12204e-09
2289	chr1	127238729	127238729	1	*	hypo	2.57249e-08
2292	chr1	127359458	127359458	1	*	hyper	3.17258e-06
2296	chr1	127395367	127395367	1	*	hypo	2.02108e-06
2300	chr1	127504217	127504217	1	*	hyper	2.19337e-08
2303	chr1	127661696	127661696	1	*	hyper	1.609e-06
2305	chr1	127677594	127677594	1	*	hyper	5.57525e-07
2307	chr1	127711287	127711287	1	*	hypo	5.35353e-10
2309	chr1	127736533	127736533	1	*	hypo	2.59321e-11
2311	chr1	127974899	127974899	1	*	hypo	3.04163e-06
2314	chr1	127995793	127995793	1	*	hyper	1.27354e-06
2316	chr1	128046946	128046946	1	*	hyper	1.51238e-06
2319	chr1	128070324	128070324	1	*	hypo	8.37283e-07
2322	chr1	128071536	128071536	1	*	hypo	5.65136e-07
2325	chr1	128072333	128072333	1	*	hypo	1.32632e-06
2328	chr1	128073013	128073013	1	*	hypo	2.00822e-08
2331	chr1	128073200	128073200	1	*	hypo	7.05141e-09
2334	chr1	128074719	128074719	1	*	hypo	1.98089e-06
2337	chr1	128074752	128074752	1	*	hypo	3.54702e-07
2340	chr1	128076285	128076285	1	*	hypo	3.61733e-07
2343	chr1	128076347	128076347	1	*	hypo	6.34431e-07
2345	chr1	128077538	128077538	1	*	hypo	2.20995e-07
2348	chr1	128080261	128080261	1	*	hypo	4.19771e-06
2351	chr1	128082285	128082285	1	*	hypo	5.874e-07
2354	chr1	128084300	128084300	1	*	hypo	3.58321e-07
2357	chr1	128090881	128090881	1	*	hyper	5.27235e-10
2359	chr1	128164596	128164596	1	*	hyper	1.05163e-06
2362	chr1	128172844	128172844	1	*	hyper	1.44578e-10
2365	chr1	128184323	128184323	1	*	hypo	8.04709e-07
2367	chr1	128233485	128233485	1	*	hyper	2.77129e-06
2369	chr1	128340965	128340965	1	*	hypo	1.44967e-06
2372	chr1	128393383	128393383	1	*	hypo	4.57239e-06
2376	chr1	128441126	128441126	1	*	hypo	2.72387e-06
2381	chr1	128682970	128682970	1	*	hyper	2.91677e-07
2385	chr1	128691490	128691490	1	*	hypo	8.45856e-11
2389	chr1	128694235	128694235	1	*	hyper	1.13055e-07
2394	chr1	128694621	128694621	1	*	hyper	7.39502e-10
2399	chr1	128695873	128695873	1	*	hypo	4.05704e-06
2404	chr1	128696205	128696205	1	*	hypo	1.09306e-09
2408	chr1	128696283	128696283	1	*	hypo	1.62618e-06
2412	chr1	128701989	128701989	1	*	hyper	5.34273e-06
2417	chr1	128715195	128715195	1	*	hypo	7.51079e-09
2421	chr1	128717539	128717539	1	*	hypo	4.63142e-09
2425	chr1	128728770	128728770	1	*	hyper	1.85477e-06
2430	chr1	128728778	128728778	1	*	hyper	3.27356e-08
2435	chr1	128729143	128729143	1	*	hypo	2.06914e-11
2439	chr1	128824515	128824515	1	*	hyper	4.2724e-06
2443	chr1	128825720	128825720	1	*	hypo	1.28962e-06
2448	chr1	128912815	128912815	1	*	hypo	5.59435e-07
2452	chr1	129530875	129530875	1	*	hyper	5.6118e-06
2454	chr1	129548088	129548088	1	*	hyper	5.69117e-08
2457	chr1	129550909	129550909	1	*	hyper	1.10102e-10
2459	chr1	129551844	129551844	1	*	hyper	6.50303e-08
2461	chr1	129558989	129558989	1	*	hyper	3.79312e-07
2465	chr1	129560917	129560917	1	*	hyper	1.33237e-06
2470	chr1	129771902	129771902	1	*	hyper	8.26518e-11
2473	chr1	129794956	129794956	1	*	hyper	2.3319e-08
2476	chr1	129799080	129799080	1	*	hyper	5.26495e-06
2479	chr1	129817676	129817676	1	*	hyper	8.76993e-12
2481	chr1	129834253	129834253	1	*	hyper	2.25854e-08
2484	chr1	129847443	129847443	1	*	hypo	4.61251e-10
2486	chr1	129855439	129855439	1	*	hyper	1.72094e-10
2489	chr1	129858397	129858397	1	*	hyper	3.98641e-09
2491	chr1	129905775	129905775	1	*	hypo	4.92588e-06
2494	chr1	129911690	129911690	1	*	hyper	8.8898e-07
2497	chr1	129977689	129977689	1	*	hyper	4.81248e-06
2499	chr1	130199315	130199315	1	*	hyper	5.33025e-06
2502	chr1	130216151	130216151	1	*	hyper	3.25641e-12
2505	chr1	130216695	130216695	1	*	hypo	1.11013e-07
2509	chr1	130232323	130232323	1	*	hyper	1.42557e-14
2512	chr1	130241820	130241820	1	*	hyper	2.92089e-07
2515	chr1	130243563	130243563	1	*	hyper	1.6587e-07
2518	chr1	130271778	130271778	1	*	hyper	1.48937e-08
2521	chr1	130272020	130272020	1	*	hyper	2.05503e-07
2523	chr1	130280012	130280012	1	*	hypo	1.02938e-12
2526	chr1	130332269	130332269	1	*	hyper	2.71981e-08
2531	chr1	130352866	130352866	1	*	hypo	5.50573e-07
2536	chr1	130363510	130363510	1	*	hyper	7.26199e-09
2540	chr1	130377510	130377510	1	*	hyper	5.65594e-10
2544	chr1	130386117	130386117	1	*	hypo	3.10412e-06
2548	chr1	130427340	130427340	1	*	hypo	3.45376e-06
2553	chr1	130464968	130464968	1	*	hyper	1.14836e-08
2558	chr1	130487809	130487809	1	*	hypo	3.10205e-06
2562	chr1	130496309	130496309	1	*	hypo	1.97082e-07
2566	chr1	130514878	130514878	1	*	hypo	1.93584e-06
2569	chr1	130515582	130515582	1	*	hyper	1.25114e-10
2571	chr1	130540457	130540457	1	*	hypo	4.31106e-06
2573	chr1	130544356	130544356	1	*	hyper	7.32435e-10
2576	chr1	130545939	130545939	1	*	hyper	6.85026e-11
2579	chr1	130548631	130548631	1	*	hyper	4.16987e-10
2582	chr1	130559361	130559361	1	*	hyper	1.08958e-09
2584	chr1	130559845	130559845	1	*	hyper	4.31337e-13
2586	chr1	130563281	130563281	1	*	hypo	1.19772e-07
2589	chr1	130567167	130567167	1	*	hyper	1.45158e-14
2592	chr1	130568403	130568403	1	*	hyper	3.5567e-08
2594	chr1	130568570	130568570	1	*	hyper	4.55257e-08
2596	chr1	130579757	130579757	1	*	hyper	1.95236e-11
2599	chr1	130604134	130604134	1	*	hyper	1.15434e-09
2602	chr1	130612564	130612564	1	*	hyper	5.36295e-10
2605	chr1	130623162	130623162	1	*	hyper	2.53491e-11
2607	chr1	130705688	130705688	1	*	hyper	1.8462e-07
2610	chr1	130883749	130883749	1	*	hypo	1.00176e-06
2614	chr1	130984764	130984764	1	*	hyper	2.00258e-08
2616	chr1	130993918	130993918	1	*	hyper	5.96625e-09
2619	chr1	131045268	131045268	1	*	hypo	6.19574e-06
2622	chr1	131168119	131168119	1	*	hyper	5.11378e-07
2625	chr1	131217973	131217973	1	*	hyper	1.25117e-06
2627	chr1	131222436	131222436	1	*	hyper	2.16279e-08
2630	chr1	131253853	131253853	1	*	hypo	4.83093e-08
2633	chr1	131275205	131275205	1	*	hypo	1.60786e-09
2636	chr1	131460467	131460467	1	*	hypo	1.36284e-06
2638	chr1	131480899	131480899	1	*	hyper	3.07594e-08
2641	chr1	131492669	131492669	1	*	hypo	8.55539e-09
2643	chr1	131991304	131991304	1	*	hypo	5.67885e-09
2645	chr1	131992032	131992032	1	*	hypo	6.89237e-12
2648	chr1	132116182	132116182	1	*	hypo	5.03636e-06
2650	chr1	132181694	132181694	1	*	hypo	9.09996e-08
2655	chr1	132273510	132273510	1	*	hyper	5.71389e-07
2659	chr1	132345797	132345797	1	*	hyper	6.72645e-09
2662	chr1	132410322	132410322	1	*	hyper	1.28941e-10
2664	chr1	132429393	132429393	1	*	hypo	6.49843e-07
2666	chr1	132592644	132592644	1	*	hyper	7.47891e-11
2668	chr1	132639421	132639421	1	*	hypo	3.96754e-07
2671	chr1	133214322	133214322	1	*	hyper	1.38193e-15
2674	chr1	133221299	133221299	1	*	hyper	9.5736e-15
2676	chr1	133277870	133277870	1	*	hyper	8.13388e-15
2679	chr1	133298637	133298637	1	*	hypo	7.12893e-10
2682	chr1	133303487	133303487	1	*	hyper	1.89815e-08
2685	chr1	133335936	133335936	1	*	hyper	8.39752e-08
2688	chr1	133337174	133337174	1	*	hyper	5.66648e-11
2691	chr1	133384514	133384514	1	*	hyper	1.08374e-07
2694	chr1	133387301	133387301	1	*	hyper	2.27113e-13
2697	chr1	133406528	133406528	1	*	hypo	9.69664e-07
2700	chr1	133409647	133409647	1	*	hyper	4.45456e-06
2703	chr1	133415092	133415092	1	*	hyper	3.64047e-06
2706	chr1	133440667	133440667	1	*	hyper	1.42042e-07
2709	chr1	133441460	133441460	1	*	hyper	1.29829e-14
2712	chr1	133441823	133441823	1	*	hyper	3.96463e-10
2714	chr1	133443402	133443402	1	*	hyper	6.98271e-16
2716	chr1	133546291	133546291	1	*	hyper	1.61629e-06
2719	chr1	133931444	133931444	1	*	hyper	6.13707e-07
2722	chr1	133941309	133941309	1	*	hyper	1.65897e-06
2725	chr1	134607001	134607001	1	*	hypo	4.6819e-07
2728	chr1	134662526	134662526	1	*	hypo	4.82417e-06
2731	chr1	134719833	134719833	1	*	hyper	5.61428e-06
2733	chr1	134964453	134964453	1	*	hyper	5.06692e-06
2735	chr1	134982203	134982203	1	*	hyper	3.59378e-06
2737	chr1	135495413	135495413	1	*	hypo	1.00363e-06
2741	chr1	136041481	136041481	1	*	hyper	5.5092e-07
2745	chr1	136213524	136213524	1	*	hypo	2.98466e-07
2749	chr1	136678018	136678018	1	*	hyper	1.05412e-06
2752	chr1	136701900	136701900	1	*	hypo	1.02632e-06
2755	chr1	136951240	136951240	1	*	hyper	1.99483e-08
2760	chr1	136960568	136960568	1	*	hyper	4.39114e-07
2764	chr1	136970679	136970679	1	*	hyper	2.23772e-08
2768	chr1	137002789	137002789	1	*	hyper	3.20923e-06
2772	chr1	137009341	137009341	1	*	hyper	3.27245e-06
2777	chr1	137056790	137056790	1	*	hyper	6.54681e-08
2781	chr1	137058907	137058907	1	*	hyper	5.67787e-08
2786	chr1	137093642	137093642	1	*	hyper	1.41553e-09
2791	chr1	137115079	137115079	1	*	hypo	1.77314e-09
2796	chr1	137313843	137313843	1	*	hyper	2.09269e-07
2799	chr1	137382401	137382401	1	*	hyper	2.48605e-07
2802	chr1	137737662	137737662	1	*	hypo	8.32525e-09
2804	chr1	138547339	138547339	1	*	hypo	1.09703e-11
2807	chr1	138601119	138601119	1	*	hypo	6.67171e-10
2809	chr1	138690986	138690986	1	*	hypo	2.34688e-06
2811	chr1	138740107	138740107	1	*	hypo	2.1606e-06
2814	chr1	139111810	139111810	1	*	hypo	1.40646e-06
2816	chr1	139139047	139139047	1	*	hyper	6.10313e-08
2819	chr1	139175230	139175230	1	*	hyper	4.86392e-11
2822	chr1	139177905	139177905	1	*	hyper	1.01939e-06
2825	chr1	139178867	139178867	1	*	hyper	1.1566e-08
2828	chr1	139180246	139180246	1	*	hyper	1.74427e-09
2831	chr1	139185702	139185702	1	*	hyper	3.31741e-08
2833	chr1	139186233	139186233	1	*	hyper	3.60055e-07
2835	chr1	139275820	139275820	1	*	hyper	3.89218e-06
2840	chr1	139414809	139414809	1	*	hyper	1.18708e-06
2843	chr1	139445407	139445407	1	*	hyper	7.78067e-09
2848	chr1	139448715	139448715	1	*	hyper	6.33777e-09
2853	chr1	139458929	139458929	1	*	hyper	6.85882e-10
2856	chr1	139458986	139458986	1	*	hyper	2.89251e-10
2859	chr1	139470456	139470456	1	*	hyper	2.63998e-06
2862	chr1	140745765	140745765	1	*	hypo	7.55947e-08
2864	chr1	141285576	141285576	1	*	hypo	1.75506e-13
2867	chr1	141460975	141460975	1	*	hypo	4.9858e-08
2871	chr1	141463529	141463529	1	*	hypo	2.15161e-07
2876	chr1	141515392	141515392	1	*	hypo	1.87822e-06
2878	chr1	141594693	141594693	1	*	hyper	9.84714e-07
2881	chr1	141948697	141948697	1	*	hypo	5.24543e-09
2884	chr1	142340401	142340401	1	*	hypo	1.69419e-06
2886	chr1	142498993	142498993	1	*	hyper	2.46994e-07
2890	chr1	142625104	142625104	1	*	hyper	3.04971e-06
2893	chr1	142800149	142800149	1	*	hyper	1.55544e-06
2895	chr1	142804946	142804946	1	*	hyper	2.90209e-06
2897	chr1	142810534	142810534	1	*	hyper	4.97732e-09
2899	chr1	142811961	142811961	1	*	hyper	1.40263e-07
2901	chr1	143125644	143125644	1	*	hyper	1.33835e-07
2905	chr1	143132008	143132008	1	*	hyper	6.28698e-08
2908	chr1	143132250	143132250	1	*	hyper	4.30373e-07
2911	chr1	143152451	143152451	1	*	hypo	6.77994e-09
2914	chr1	143736742	143736742	1	*	hyper	1.06754e-09
2917	chr1	143755665	143755665	1	*	hyper	5.64694e-08
2919	chr1	143770954	143770954	1	*	hyper	1.99509e-10
2921	chr1	143775772	143775772	1	*	hyper	5.34015e-07
2923	chr1	143823395	143823395	1	*	hyper	6.58751e-09
2927	chr1	143840173	143840173	1	*	hyper	2.14114e-07
2931	chr1	143845036	143845036	1	*	hyper	6.87014e-08
2934	chr1	143854798	143854798	1	*	hyper	2.45072e-11
2937	chr1	143868775	143868775	1	*	hyper	1.91145e-12
2941	chr1	144057036	144057036	1	*	hyper	2.37627e-07
2944	chr1	144157660	144157660	1	*	hyper	2.08796e-11
2949	chr1	144181783	144181783	1	*	hyper	1.42473e-07
2951	chr1	144245440	144245440	1	*	hypo	2.22676e-06
2953	chr1	144327833	144327833	1	*	hypo	3.85929e-06
2957	chr1	144336535	144336535	1	*	hypo	4.36046e-08
2960	chr1	144338260	144338260	1	*	hypo	1.21796e-07
2962	chr1	144345058	144345058	1	*	hypo	9.7008e-10
2966	chr1	144364085	144364085	1	*	hyper	3.2595e-07
2968	chr1	144441236	144441236	1	*	hyper	1.27932e-06
2971	chr1	144581872	144581872	1	*	hypo	7.06521e-11
2977	chr1	144655482	144655482	1	*	hyper	5.43499e-09
2979	chr1	144682741	144682741	1	*	hyper	9.05374e-12
2984	chr1	144971642	144971642	1	*	hypo	8.71618e-09
2986	chr1	144982301	144982301	1	*	hyper	3.11288e-06
2988	chr1	145014375	145014375	1	*	hypo	5.40693e-07
2991	chr1	145021331	145021331	1	*	hypo	2.09092e-06
2993	chr1	145068578	145068578	1	*	hyper	2.18664e-06
2996	chr1	145073395	145073395	1	*	hyper	1.2592e-06
2999	chr1	145117346	145117346	1	*	hyper	1.38781e-06
3002	chr1	145121622	145121622	1	*	hyper	2.91153e-08
3004	chr1	145121679	145121679	1	*	hyper	4.84308e-09
3006	chr1	145121723	145121723	1	*	hyper	2.33717e-09
3008	chr1	145126266	145126266	1	*	hyper	1.01932e-05
3010	chr1	145134280	145134280	1	*	hypo	1.60963e-08
3012	chr1	145139520	145139520	1	*	hyper	1.19312e-07
3015	chr1	145144722	145144722	1	*	hyper	3.64116e-11
3017	chr1	145166008	145166008	1	*	hypo	7.634e-13
3020	chr1	145264644	145264644	1	*	hyper	1.05464e-05
3024	chr1	145389363	145389363	1	*	hypo	2.9772e-08
3026	chr1	145406349	145406349	1	*	hyper	1.25954e-07
3031	chr1	145588634	145588634	1	*	hyper	1.75968e-06
3036	chr1	145599564	145599564	1	*	hyper	6.51472e-06
3040	chr1	145619645	145619645	1	*	hyper	1.06992e-05
3045	chr1	145622985	145622985	1	*	hypo	3.62534e-07
3049	chr1	145650687	145650687	1	*	hyper	4.76972e-08
3052	chr1	145682434	145682434	1	*	hypo	1.13214e-06
3056	chr1	145685482	145685482	1	*	hypo	1.04157e-08
3060	chr1	145710330	145710330	1	*	hypo	1.21303e-07
3062	chr1	145715203	145715203	1	*	hypo	1.79902e-09
3065	chr1	145733348	145733348	1	*	hypo	8.48535e-10
3067	chr1	145821447	145821447	1	*	hypo	2.26369e-10
3072	chr1	145870843	145870843	1	*	hypo	4.45991e-15
3077	chr1	145890791	145890791	1	*	hyper	3.50555e-08
3080	chr1	145900043	145900043	1	*	hypo	2.12714e-07
3085	chr1	145904394	145904394	1	*	hyper	1.70691e-08
3090	chr1	146106956	146106956	1	*	hyper	3.42921e-07
3092	chr1	146141696	146141696	1	*	hyper	9.40391e-07
3095	chr1	146159171	146159171	1	*	hypo	1.47557e-06
3097	chr1	146344712	146344712	1	*	hyper	4.90708e-17
3102	chr1	146467348	146467348	1	*	hypo	4.58887e-08
3104	chr1	146487609	146487609	1	*	hypo	8.86423e-08
3107	chr1	146491056	146491056	1	*	hypo	1.87812e-10
3110	chr1	146503590	146503590	1	*	hypo	9.38313e-06
3112	chr1	146506115	146506115	1	*	hypo	2.07872e-07
3114	chr1	146542427	146542427	1	*	hypo	1.83527e-08
3119	chr1	146614943	146614943	1	*	hyper	4.88978e-09
3122	chr1	146632186	146632186	1	*	hyper	7.0962e-09
3124	chr1	146681540	146681540	1	*	hyper	6.87987e-06
3127	chr1	146687986	146687986	1	*	hyper	4.3435e-09
3130	chr1	146689114	146689114	1	*	hypo	1.58296e-08
3133	chr1	146764799	146764799	1	*	hyper	6.16902e-06
3135	chr1	146895981	146895981	1	*	hyper	3.68665e-06
3137	chr1	146912803	146912803	1	*	hyper	1.75312e-06
3140	chr1	146912960	146912960	1	*	hyper	1.99673e-06
3142	chr1	146975985	146975985	1	*	hypo	1.85334e-08
3146	chr1	146976110	146976110	1	*	hypo	3.51021e-13
3150	chr1	146993313	146993313	1	*	hypo	1.56518e-10
3154	chr1	147049892	147049892	1	*	hypo	2.67469e-12
3158	chr1	147079262	147079262	1	*	hyper	2.06878e-08
3162	chr1	147084773	147084773	1	*	hyper	7.32672e-06
3166	chr1	147100152	147100152	1	*	hyper	2.0316e-08
3170	chr1	147107477	147107477	1	*	hyper	1.54883e-05
3174	chr1	147109139	147109139	1	*	hyper	2.77703e-08
3178	chr1	147115065	147115065	1	*	hypo	4.56981e-10
3183	chr1	147117500	147117500	1	*	hyper	2.88791e-11
3187	chr1	147161743	147161743	1	*	hyper	1.05464e-05
3191	chr1	147170398	147170398	1	*	hyper	7.15614e-06
3195	chr1	147182429	147182429	1	*	hyper	2.8187e-07
3200	chr1	147192397	147192397	1	*	hyper	6.23704e-06
3205	chr1	147227572	147227572	1	*	hyper	2.52832e-07
3209	chr1	147238001	147238001	1	*	hyper	8.49828e-06
3214	chr1	147381472	147381472	1	*	hyper	6.65939e-10
3216	chr1	147381505	147381505	1	*	hyper	7.02005e-10
3218	chr1	147383508	147383508	1	*	hyper	1.39579e-08
3221	chr1	147385401	147385401	1	*	hyper	8.23837e-13
3224	chr1	147405191	147405191	1	*	hypo	1.1959e-07
3227	chr1	147437724	147437724	1	*	hypo	2.34724e-09
3229	chr1	147439867	147439867	1	*	hyper	2.32441e-09
3231	chr1	147515418	147515418	1	*	hyper	1.35766e-09
3234	chr1	147522002	147522002	1	*	hypo	4.19852e-06
3237	chr1	147524843	147524843	1	*	hyper	1.45946e-05
3239	chr1	147544266	147544266	1	*	hypo	1.29936e-07
3241	chr1	147556957	147556957	1	*	hypo	2.12499e-06
3244	chr1	147557596	147557596	1	*	hyper	1.34617e-05
3248	chr1	147622046	147622046	1	*	hyper	1.28266e-10
3251	chr1	147702274	147702274	1	*	hyper	2.46239e-10
3254	chr1	147732446	147732446	1	*	hyper	1.26959e-08
3257	chr1	147737444	147737444	1	*	hyper	8.10355e-06
3260	chr1	147856767	147856767	1	*	hypo	3.99026e-11
3263	chr1	147858401	147858401	1	*	hypo	3.57254e-09
3266	chr1	147859263	147859263	1	*	hypo	5.44854e-09
3268	chr1	147860720	147860720	1	*	hypo	1.74222e-11
3270	chr1	147866160	147866160	1	*	hyper	1.50373e-05
3272	chr1	147875801	147875801	1	*	hypo	1.35219e-09
3274	chr1	147876695	147876695	1	*	hypo	3.24632e-09
3276	chr1	147887269	147887269	1	*	hypo	1.09321e-05
3278	chr1	147888723	147888723	1	*	hypo	5.05355e-09
3281	chr1	147889083	147889083	1	*	hypo	4.84554e-10
3283	chr1	147896541	147896541	1	*	hypo	1.42092e-13
3286	chr1	147898491	147898491	1	*	hypo	1.34577e-14
3289	chr1	147908681	147908681	1	*	hyper	1.78263e-07
3292	chr1	147912101	147912101	1	*	hyper	1.14449e-05
3295	chr1	148022415	148022415	1	*	hypo	2.28675e-20
3297	chr1	148058177	148058177	1	*	hyper	1.78057e-10
3299	chr1	148470538	148470538	1	*	hypo	6.12326e-09
3302	chr1	148472235	148472235	1	*	hypo	5.06213e-06
3304	chr1	148473254	148473254	1	*	hypo	2.56158e-09
3307	chr1	148477560	148477560	1	*	hypo	3.95763e-08
3309	chr1	148479266	148479266	1	*	hypo	1.2059e-10
3311	chr1	148489868	148489868	1	*	hypo	1.76979e-07
3313	chr1	148526742	148526742	1	*	hyper	3.82465e-08
3316	chr1	148527032	148527032	1	*	hyper	9.4137e-09
3318	chr1	148533229	148533229	1	*	hyper	1.61917e-18
3321	chr1	148545654	148545654	1	*	hyper	3.52018e-14
3323	chr1	148547225	148547225	1	*	hyper	3.62158e-20
3325	chr1	148553434	148553434	1	*	hyper	6.32494e-10
3327	chr1	148563912	148563912	1	*	hyper	6.47105e-10
3329	chr1	148597660	148597660	1	*	hyper	2.11486e-07
3331	chr1	148668560	148668560	1	*	hyper	4.8447e-06
3335	chr1	148668742	148668742	1	*	hyper	2.80509e-06
3339	chr1	148669871	148669871	1	*	hyper	1.93457e-06
3343	chr1	148671300	148671300	1	*	hyper	6.95682e-08
3348	chr1	148734691	148734691	1	*	hyper	1.4576e-06
3350	chr1	148931618	148931618	1	*	hypo	8.17731e-09
3353	chr1	149041808	149041808	1	*	hyper	8.59456e-09
3356	chr1	149073733	149073733	1	*	hyper	2.57184e-09
3358	chr1	149089016	149089016	1	*	hyper	1.19456e-08
3360	chr1	149176202	149176202	1	*	hyper	3.88565e-08
3362	chr1	149202361	149202361	1	*	hyper	8.36014e-07
3364	chr1	149233106	149233106	1	*	hypo	2.24234e-09
3366	chr1	149240436	149240436	1	*	hypo	6.6622e-07
3369	chr1	149248429	149248429	1	*	hyper	1.39099e-05
3372	chr1	149271602	149271602	1	*	hyper	1.24651e-11
3375	chr1	149279146	149279146	1	*	hyper	2.57082e-08
3378	chr1	149280079	149280079	1	*	hyper	6.45762e-10
3380	chr1	149281766	149281766	1	*	hyper	1.55515e-10
3383	chr1	149292566	149292566	1	*	hypo	3.93155e-11
3385	chr1	149292693	149292693	1	*	hyper	1.18257e-12
3388	chr1	149309897	149309897	1	*	hyper	8.99926e-14
3392	chr1	149322004	149322004	1	*	hyper	6.18996e-06
3394	chr1	149323570	149323570	1	*	hypo	6.65797e-10
3397	chr1	149325836	149325836	1	*	hypo	1.46558e-08
3400	chr1	149338721	149338721	1	*	hypo	6.24062e-12
3404	chr1	149345687	149345687	1	*	hyper	2.64625e-09
3408	chr1	149349018	149349018	1	*	hyper	4.59745e-11
3412	chr1	149354352	149354352	1	*	hypo	3.68935e-09
3417	chr1	149360208	149360208	1	*	hyper	1.99095e-14
3422	chr1	149366326	149366326	1	*	hyper	4.23717e-11
3426	chr1	149367371	149367371	1	*	hypo	7.68035e-09
3430	chr1	149370291	149370291	1	*	hypo	2.66687e-11
3435	chr1	149374963	149374963	1	*	hypo	1.58296e-08
3440	chr1	149380023	149380023	1	*	hyper	8.94723e-13
3445	chr1	149401760	149401760	1	*	hyper	7.4129e-10
3450	chr1	149409626	149409626	1	*	hyper	6.48278e-15
3454	chr1	149409674	149409674	1	*	hyper	5.39669e-15
3458	chr1	149412220	149412220	1	*	hyper	1.61814e-13
3462	chr1	149415046	149415046	1	*	hyper	3.71251e-15
3466	chr1	149424831	149424831	1	*	hyper	5.15535e-11
3470	chr1	149426300	149426300	1	*	hyper	3.30641e-07
3474	chr1	149426798	149426798	1	*	hyper	2.6487e-09
3478	chr1	149427761	149427761	1	*	hyper	2.68769e-11
3482	chr1	149429594	149429594	1	*	hyper	8.38344e-11
3486	chr1	149433112	149433112	1	*	hyper	9.14548e-14
3490	chr1	149433323	149433323	1	*	hyper	3.50554e-08
3494	chr1	149437356	149437356	1	*	hyper	1.72324e-11
3499	chr1	149437536	149437536	1	*	hyper	9.16334e-10
3504	chr1	149437742	149437742	1	*	hyper	6.54572e-07
3509	chr1	149437934	149437934	1	*	hyper	2.69452e-19
3512	chr1	149441122	149441122	1	*	hyper	3.77447e-07
3515	chr1	149441987	149441987	1	*	hyper	2.536e-15
3518	chr1	149444896	149444896	1	*	hyper	8.93586e-16
3521	chr1	149445514	149445514	1	*	hyper	2.99775e-12
3524	chr1	149484794	149484794	1	*	hypo	1.07343e-05
3529	chr1	149551360	149551360	1	*	hypo	1.05925e-06
3532	chr1	149575095	149575095	1	*	hyper	9.21056e-06
3534	chr1	149656837	149656837	1	*	hyper	7.32329e-08
3538	chr1	149667796	149667796	1	*	hyper	4.07698e-06
3542	chr1	149762460	149762460	1	*	hyper	5.99471e-06
3545	chr1	149821675	149821675	1	*	hyper	3.31361e-07
3548	chr1	149851268	149851268	1	*	hypo	4.42425e-06
3550	chr1	149866781	149866781	1	*	hypo	4.15617e-06
3552	chr1	149892009	149892009	1	*	hypo	5.94144e-12
3555	chr1	149985585	149985585	1	*	hyper	2.51591e-12
3558	chr1	150029087	150029087	1	*	hyper	1.45195e-09
3560	chr1	150128695	150128695	1	*	hyper	2.4252e-08
3562	chr1	150192953	150192953	1	*	hyper	4.2724e-06
3565	chr1	150251383	150251383	1	*	hypo	5.27967e-08
3567	chr1	150281939	150281939	1	*	hypo	7.02482e-06
3569	chr1	150315840	150315840	1	*	hyper	5.30543e-06
3572	chr1	150326732	150326732	1	*	hyper	8.52704e-07
3575	chr1	150349033	150349033	1	*	hypo	5.67787e-08
3577	chr1	150360451	150360451	1	*	hypo	7.90316e-06
3580	chr1	150362683	150362683	1	*	hyper	9.51828e-07
3582	chr1	150407549	150407549	1	*	hyper	1.2109e-05
3585	chr1	150423327	150423327	1	*	hyper	4.74417e-06
3588	chr1	150541152	150541152	1	*	hypo	2.31971e-10
3590	chr1	150644014	150644014	1	*	hypo	1.00505e-05
3593	chr1	150798057	150798057	1	*	hypo	2.1111e-06
3597	chr1	151026894	151026894	1	*	hyper	1.20832e-06
3600	chr1	151027564	151027564	1	*	hyper	1.27844e-06
3603	chr1	151038224	151038224	1	*	hypo	7.71896e-06
3606	chr1	151038644	151038644	1	*	hypo	5.20464e-06
3608	chr1	151066661	151066661	1	*	hyper	5.43306e-15
3611	chr1	151081564	151081564	1	*	hyper	5.79471e-06
3614	chr1	151089602	151089602	1	*	hyper	1.14462e-06
3616	chr1	151099932	151099932	1	*	hypo	1.39021e-06
3619	chr1	151127727	151127727	1	*	hypo	1.40031e-12
3622	chr1	151141986	151141986	1	*	hyper	5.46781e-08
3624	chr1	151146395	151146395	1	*	hyper	1.71685e-06
3627	chr1	151244783	151244783	1	*	hyper	3.52767e-07
3630	chr1	151248048	151248048	1	*	hyper	1.53502e-08
3632	chr1	151255356	151255356	1	*	hyper	1.18577e-05
3635	chr1	151259623	151259623	1	*	hyper	2.74954e-08
3638	chr1	151322843	151322843	1	*	hypo	2.16169e-06
3641	chr1	151331086	151331086	1	*	hypo	2.04649e-06
3643	chr1	151332981	151332981	1	*	hyper	6.6072e-06
3645	chr1	151335167	151335167	1	*	hyper	1.56098e-12
3647	chr1	151351362	151351362	1	*	hyper	7.58344e-09
3650	chr1	151351366	151351366	1	*	hyper	2.27713e-08
3653	chr1	151351870	151351870	1	*	hyper	5.81326e-10
3655	chr1	151354218	151354218	1	*	hyper	1.26666e-16
3657	chr1	151354375	151354375	1	*	hyper	2.60576e-13
3659	chr1	151358417	151358417	1	*	hypo	2.39739e-08
3661	chr1	151361011	151361011	1	*	hypo	2.82188e-08
3664	chr1	151372435	151372435	1	*	hypo	3.01492e-09
3666	chr1	151420143	151420143	1	*	hyper	9.74596e-06
3669	chr1	151446430	151446430	1	*	hypo	1.45905e-06
3671	chr1	151495809	151495809	1	*	hyper	2.63413e-07
3675	chr1	151518892	151518892	1	*	hyper	6.18812e-15
3680	chr1	151579580	151579580	1	*	hyper	1.51865e-11
3683	chr1	151581023	151581023	1	*	hyper	1.03534e-14
3686	chr1	151581432	151581432	1	*	hyper	1.33461e-08
3688	chr1	151590783	151590783	1	*	hyper	6.30912e-11
3690	chr1	151594659	151594659	1	*	hyper	4.62447e-13
3692	chr1	151671300	151671300	1	*	hypo	7.02903e-06
3694	chr1	151886665	151886665	1	*	hyper	5.00096e-06
3696	chr1	151896574	151896574	1	*	hyper	6.58418e-07
3698	chr1	151898456	151898456	1	*	hyper	4.51221e-07
3700	chr1	151931236	151931236	1	*	hyper	9.07535e-08
3703	chr1	151946235	151946235	1	*	hyper	3.27376e-08
3706	chr1	151966313	151966313	1	*	hyper	3.24836e-06
3709	chr1	152085143	152085143	1	*	hypo	6.33791e-08
3712	chr1	152142131	152142131	1	*	hyper	1.10958e-08
3715	chr1	152165667	152165667	1	*	hyper	2.09098e-06
3718	chr1	152241694	152241694	1	*	hyper	4.81054e-06
3723	chr1	152255001	152255001	1	*	hypo	3.71558e-08
3727	chr1	152267487	152267487	1	*	hyper	1.01023e-06
3732	chr1	152268986	152268986	1	*	hyper	1.95309e-06
3737	chr1	152269322	152269322	1	*	hyper	1.18759e-09
3742	chr1	152380281	152380281	1	*	hyper	2.88735e-08
3744	chr1	152401748	152401748	1	*	hyper	2.69665e-06
3746	chr1	152414345	152414345	1	*	hypo	5.12007e-06
3749	chr1	152434211	152434211	1	*	hypo	1.15915e-09
3752	chr1	152442163	152442163	1	*	hypo	8.42039e-07
3756	chr1	152443384	152443384	1	*	hypo	5.94164e-06
3760	chr1	152511414	152511414	1	*	hyper	1.2627e-06
3764	chr1	152548990	152548990	1	*	hypo	2.90554e-08
3768	chr1	152822181	152822181	1	*	hyper	2.5245e-06
3772	chr1	152831632	152831632	1	*	hypo	6.94794e-08
3777	chr1	152845312	152845312	1	*	hyper	3.86288e-08
3779	chr1	153010433	153010433	1	*	hypo	1.76716e-06
3781	chr1	153079855	153079855	1	*	hypo	9.58449e-13
3784	chr1	153081219	153081219	1	*	hypo	8.12757e-06
3786	chr1	153106578	153106578	1	*	hyper	1.06603e-06
3788	chr1	153116854	153116854	1	*	hypo	6.79107e-06
3791	chr1	153153290	153153290	1	*	hypo	3.14965e-10
3793	chr1	153160983	153160983	1	*	hyper	5.27026e-13
3795	chr1	153162701	153162701	1	*	hyper	4.29056e-12
3797	chr1	153164105	153164105	1	*	hyper	6.02594e-12
3800	chr1	153164932	153164932	1	*	hypo	1.40359e-08
3803	chr1	153166714	153166714	1	*	hyper	2.48677e-10
3806	chr1	153168201	153168201	1	*	hyper	2.70292e-07
3809	chr1	153177380	153177380	1	*	hyper	2.70371e-11
3813	chr1	153190381	153190381	1	*	hyper	7.50481e-12
3817	chr1	153192724	153192724	1	*	hyper	1.69167e-11
3821	chr1	153193059	153193059	1	*	hyper	4.71747e-12
3825	chr1	153222815	153222815	1	*	hyper	2.20181e-14
3829	chr1	153224155	153224155	1	*	hypo	1.8858e-13
3834	chr1	153257971	153257971	1	*	hypo	7.44057e-13
3837	chr1	153263756	153263756	1	*	hyper	3.9704e-13
3843	chr1	153269223	153269223	1	*	hypo	9.28243e-16
3845	chr1	153307953	153307953	1	*	hyper	8.27806e-14
3850	chr1	153322733	153322733	1	*	hypo	3.57949e-17
3853	chr1	153393634	153393634	1	*	hypo	2.13626e-07
3856	chr1	153411314	153411314	1	*	hypo	2.68232e-07
3858	chr1	153415322	153415322	1	*	hypo	5.00997e-06
3861	chr1	153454585	153454585	1	*	hyper	1.44937e-11
3863	chr1	153474354	153474354	1	*	hyper	7.49276e-07
3866	chr1	153476085	153476085	1	*	hyper	1.32258e-08
3868	chr1	153477146	153477146	1	*	hyper	3.27029e-08
3871	chr1	153485451	153485451	1	*	hyper	1.94742e-13
3873	chr1	153497903	153497903	1	*	hyper	8.45448e-07
3875	chr1	153519873	153519873	1	*	hyper	3.2703e-09
3877	chr1	153520376	153520376	1	*	hyper	3.14494e-07
3879	chr1	153632141	153632141	1	*	hypo	1.18151e-07
3881	chr1	153632155	153632155	1	*	hypo	4.54528e-06
3883	chr1	153647695	153647695	1	*	hypo	3.60734e-08
3887	chr1	153664735	153664735	1	*	hyper	6.11776e-09
3890	chr1	153666831	153666831	1	*	hyper	2.23032e-09
3893	chr1	153675941	153675941	1	*	hypo	3.76573e-06
3895	chr1	153698364	153698364	1	*	hyper	1.00945e-06
3898	chr1	153789506	153789506	1	*	hyper	2.3185e-09
3901	chr1	153865432	153865432	1	*	hyper	7.64335e-07
3904	chr1	153871129	153871129	1	*	hyper	1.26684e-06
3906	chr1	153888739	153888739	1	*	hyper	5.24707e-08
3911	chr1	153891264	153891264	1	*	hyper	2.36185e-06
3915	chr1	153933499	153933499	1	*	hyper	5.30337e-07
3920	chr1	153993367	153993367	1	*	hyper	7.13832e-06
3925	chr1	153993758	153993758	1	*	hypo	4.6719e-13
3929	chr1	154002475	154002475	1	*	hypo	8.14045e-06
3933	chr1	154008478	154008478	1	*	hyper	3.85737e-07
3937	chr1	154029763	154029763	1	*	hypo	1.02655e-06
3942	chr1	154034197	154034197	1	*	hypo	1.43556e-09
3947	chr1	154109777	154109777	1	*	hypo	1.6843e-09
3951	chr1	154117842	154117842	1	*	hypo	3.42394e-06
3955	chr1	154155309	154155309	1	*	hyper	8.51254e-07
3960	chr1	154242073	154242073	1	*	hypo	6.19968e-06
3964	chr1	154439680	154439680	1	*	hyper	7.20411e-06
3969	chr1	154447236	154447236	1	*	hyper	7.7858e-06
3973	chr1	154492670	154492670	1	*	hyper	1.55816e-07
3977	chr1	154496174	154496174	1	*	hyper	3.98856e-06
3982	chr1	154511518	154511518	1	*	hyper	1.36375e-08
3987	chr1	154515044	154515044	1	*	hyper	2.16999e-08
3991	chr1	154527313	154527313	1	*	hyper	6.0594e-10
3996	chr1	154534307	154534307	1	*	hyper	8.3377e-08
4001	chr1	154537686	154537686	1	*	hyper	1.46432e-06
4005	chr1	154556101	154556101	1	*	hyper	7.59315e-11
4010	chr1	154701499	154701499	1	*	hyper	8.33286e-08
4013	chr1	154702066	154702066	1	*	hyper	9.69341e-09
4016	chr1	154801159	154801159	1	*	hyper	6.61013e-09
4019	chr1	154813679	154813679	1	*	hyper	4.51048e-10
4022	chr1	154816272	154816272	1	*	hyper	1.43571e-10
4024	chr1	154871783	154871783	1	*	hyper	2.37313e-11
4026	chr1	154947583	154947583	1	*	hypo	1.17792e-10
4028	chr1	154948446	154948446	1	*	hypo	4.18433e-06
4031	chr1	154963736	154963736	1	*	hyper	1.12286e-10
4033	chr1	154964693	154964693	1	*	hyper	2.40193e-08
4035	chr1	154965752	154965752	1	*	hyper	8.40213e-17
4037	chr1	154965922	154965922	1	*	hyper	1.20609e-08
4039	chr1	154968608	154968608	1	*	hyper	1.22161e-07
4042	chr1	154974298	154974298	1	*	hyper	3.04817e-09
4045	chr1	154977818	154977818	1	*	hyper	2.70918e-14
4048	chr1	154979050	154979050	1	*	hyper	8.50587e-13
4050	chr1	154986519	154986519	1	*	hyper	9.46162e-07
4052	chr1	155038091	155038091	1	*	hyper	7.32319e-06
4055	chr1	155045088	155045088	1	*	hyper	6.5108e-06
4058	chr1	155047688	155047688	1	*	hyper	1.43917e-07
4061	chr1	155062289	155062289	1	*	hyper	4.07578e-07
4063	chr1	155069052	155069052	1	*	hyper	1.95845e-07
4066	chr1	155081078	155081078	1	*	hypo	2.19232e-08
4068	chr1	155081688	155081688	1	*	hypo	4.25224e-06
4071	chr1	155088035	155088035	1	*	hypo	1.83495e-07
4074	chr1	155088518	155088518	1	*	hypo	5.04789e-10
4076	chr1	155088536	155088536	1	*	hypo	1.8994e-09
4078	chr1	155088984	155088984	1	*	hypo	1.39443e-07
4081	chr1	155103028	155103028	1	*	hyper	2.9147e-08
4084	chr1	155122573	155122573	1	*	hyper	1.33063e-07
4086	chr1	155123270	155123270	1	*	hyper	8.42179e-07
4088	chr1	155151665	155151665	1	*	hyper	3.09988e-07
4090	chr1	155166949	155166949	1	*	hyper	1.5399e-09
4092	chr1	155218988	155218988	1	*	hyper	6.30595e-07
4095	chr1	155223733	155223733	1	*	hyper	1.37084e-07
4097	chr1	155226275	155226275	1	*	hypo	5.84008e-06
4099	chr1	155226633	155226633	1	*	hypo	4.97862e-10
4101	chr1	155232638	155232638	1	*	hyper	1.06408e-07
4103	chr1	155235872	155235872	1	*	hyper	3.00991e-06
4106	chr1	155284478	155284478	1	*	hyper	1.38753e-08
4109	chr1	155287121	155287121	1	*	hypo	5.44636e-10
4112	chr1	155396034	155396034	1	*	hyper	1.47708e-06
4115	chr1	155451773	155451773	1	*	hypo	3.33543e-07
4119	chr1	155457707	155457707	1	*	hypo	6.03857e-08
4123	chr1	155458282	155458282	1	*	hypo	7.3064e-09
4127	chr1	155484715	155484715	1	*	hypo	5.81944e-09
4131	chr1	155536659	155536659	1	*	hyper	3.35128e-06
4134	chr1	155540505	155540505	1	*	hyper	3.36208e-08
4137	chr1	155581430	155581430	1	*	hyper	4.27955e-06
4140	chr1	155596216	155596216	1	*	hyper	1.07912e-06
4142	chr1	155651007	155651007	1	*	hypo	3.18095e-08
4144	chr1	155651235	155651235	1	*	hypo	9.39107e-12
4146	chr1	155685077	155685077	1	*	hypo	9.52975e-06
4149	chr1	155685936	155685936	1	*	hypo	5.024e-07
4152	chr1	155896632	155896632	1	*	hypo	3.20387e-06
4155	chr1	155928277	155928277	1	*	hypo	6.09761e-08
4158	chr1	155948216	155948216	1	*	hypo	2.11823e-07
4161	chr1	156119874	156119874	1	*	hyper	3.31257e-07
4163	chr1	156134936	156134936	1	*	hyper	1.42549e-07
4165	chr1	156202285	156202285	1	*	hyper	1.84543e-07
4168	chr1	156240317	156240317	1	*	hyper	5.30311e-08
4170	chr1	156259394	156259394	1	*	hyper	2.14246e-06
4172	chr1	156276834	156276834	1	*	hyper	1.22514e-06
4174	chr1	156289750	156289750	1	*	hyper	4.96387e-08
4176	chr1	156749194	156749194	1	*	hyper	9.78156e-07
4178	chr1	156786201	156786201	1	*	hypo	2.83652e-06
4180	chr1	156788233	156788233	1	*	hypo	1.06603e-06
4182	chr1	156929726	156929726	1	*	hypo	6.2615e-06
4184	chr1	156943989	156943989	1	*	hypo	5.40682e-07
4187	chr1	157137773	157137773	1	*	hyper	6.71505e-08
4192	chr1	157275202	157275202	1	*	hyper	5.4762e-06
4194	chr1	157459705	157459705	1	*	hyper	9.22014e-07
4196	chr1	157590922	157590922	1	*	hypo	4.83148e-07
4198	chr1	157614094	157614094	1	*	hypo	9.19782e-07
4200	chr1	158304365	158304365	1	*	hypo	4.42064e-07
4205	chr1	158476572	158476572	1	*	hyper	2.76671e-06
4208	chr2	734317	734317	1	*	hyper	3.31808e-06
4213	chr2	942049	942049	1	*	hypo	7.04584e-06
4217	chr2	2932663	2932663	1	*	hypo	1.31072e-06
4219	chr2	2932683	2932683	1	*	hypo	1.91899e-06
4221	chr2	3913277	3913277	1	*	hypo	7.92821e-07
4223	chr2	3960857	3960857	1	*	hypo	2.8099e-07
4225	chr2	3973271	3973271	1	*	hypo	5.90061e-07
4227	chr2	4444264	4444264	1	*	hypo	9.60868e-09
4230	chr2	4599641	4599641	1	*	hyper	4.98192e-07
4232	chr2	4881990	4881990	1	*	hyper	3.75603e-07
4237	chr2	4882680	4882680	1	*	hyper	1.18488e-06
4241	chr2	5181041	5181041	1	*	hypo	2.0754e-06
4244	chr2	5185910	5185910	1	*	hypo	1.61603e-06
4246	chr2	5227812	5227812	1	*	hypo	7.14346e-10
4249	chr2	5247288	5247288	1	*	hypo	5.88627e-09
4253	chr2	5557459	5557459	1	*	hypo	6.39779e-07
4256	chr2	5574772	5574772	1	*	hyper	2.33068e-06
4259	chr2	5656784	5656784	1	*	hyper	1.59187e-06
4264	chr2	6370871	6370871	1	*	hypo	1.58278e-07
4267	chr2	6379715	6379715	1	*	hypo	3.18729e-07
4270	chr2	6380583	6380583	1	*	hypo	1.97516e-07
4273	chr2	6422508	6422508	1	*	hyper	9.0951e-09
4276	chr2	6542853	6542853	1	*	hyper	5.08598e-09
4281	chr2	6561578	6561578	1	*	hyper	3.24769e-09
4285	chr2	6575948	6575948	1	*	hypo	5.81036e-08
4289	chr2	6600285	6600285	1	*	hyper	3.25978e-07
4293	chr2	6610831	6610831	1	*	hyper	2.58342e-11
4295	chr2	6623055	6623055	1	*	hypo	2.30264e-10
4297	chr2	6625852	6625852	1	*	hypo	4.22465e-11
4299	chr2	6849653	6849653	1	*	hypo	5.90376e-07
4302	chr2	7297889	7297889	1	*	hyper	7.96539e-08
4304	chr2	8260688	8260688	1	*	hypo	5.58885e-08
4307	chr2	8262248	8262248	1	*	hypo	2.68952e-07
4309	chr2	8302085	8302085	1	*	hyper	1.88549e-06
4311	chr2	8622247	8622247	1	*	hypo	6.59167e-07
4313	chr2	8716211	8716211	1	*	hypo	1.41779e-09
4316	chr2	8791530	8791530	1	*	hypo	3.53401e-08
4321	chr2	9091669	9091669	1	*	hyper	1.3754e-06
4323	chr2	9181723	9181723	1	*	hypo	8.76148e-08
4325	chr2	12390282	12390282	1	*	hypo	5.31964e-07
4328	chr2	12410088	12410088	1	*	hypo	4.44523e-09
4330	chr2	12414400	12414400	1	*	hypo	1.33237e-06
4332	chr2	12417084	12417084	1	*	hypo	3.85394e-07
4335	chr2	12850899	12850899	1	*	hypo	2.84247e-08
4337	chr2	13261213	13261213	1	*	hypo	1.25516e-07
4340	chr2	15268114	15268114	1	*	hyper	4.19838e-07
4342	chr2	15540802	15540802	1	*	hyper	2.92455e-07
4345	chr2	15584276	15584276	1	*	hypo	8.03098e-11
4347	chr2	15584750	15584750	1	*	hyper	8.01179e-11
4350	chr2	15598472	15598472	1	*	hypo	5.9503e-08
4353	chr2	15603154	15603154	1	*	hypo	5.44382e-07
4355	chr2	15763019	15763019	1	*	hypo	2.23198e-07
4358	chr2	15768051	15768051	1	*	hypo	1.7983e-09
4361	chr2	15783216	15783216	1	*	hypo	4.12567e-07
4364	chr2	15844985	15844985	1	*	hyper	1.02742e-06
4366	chr2	16123924	16123924	1	*	hyper	6.3313e-08
4368	chr2	17080072	17080072	1	*	hyper	6.74681e-08
4373	chr2	17520721	17520721	1	*	hyper	2.05172e-07
4376	chr2	17748784	17748784	1	*	hypo	7.09215e-08
4381	chr2	17766160	17766160	1	*	hyper	1.56037e-08
4385	chr2	18066321	18066321	1	*	hypo	3.52612e-07
4387	chr2	18380243	18380243	1	*	hyper	7.37618e-08
4389	chr2	18459550	18459550	1	*	hyper	1.59308e-07
4392	chr2	18489482	18489482	1	*	hyper	1.2934e-10
4395	chr2	18493605	18493605	1	*	hyper	1.59701e-07
4397	chr2	18495479	18495479	1	*	hyper	1.53687e-06
4400	chr2	18504959	18504959	1	*	hyper	5.80816e-11
4402	chr2	18505932	18505932	1	*	hyper	9.75977e-12
4404	chr2	18511027	18511027	1	*	hyper	3.2083e-11
4406	chr2	18511749	18511749	1	*	hyper	4.35901e-09
4408	chr2	18512689	18512689	1	*	hyper	6.27629e-09
4410	chr2	18515209	18515209	1	*	hypo	1.24516e-07
4412	chr2	18515818	18515818	1	*	hypo	3.0958e-06
4415	chr2	18515993	18515993	1	*	hypo	3.19886e-07
4418	chr2	18529397	18529397	1	*	hyper	2.14256e-06
4420	chr2	18547035	18547035	1	*	hyper	4.55149e-07
4422	chr2	18572856	18572856	1	*	hyper	4.41567e-06
4425	chr2	18573837	18573837	1	*	hypo	2.46795e-07
4428	chr2	18590949	18590949	1	*	hypo	7.18146e-08
4430	chr2	18596230	18596230	1	*	hyper	5.04214e-08
4432	chr2	18618500	18618500	1	*	hyper	9.88312e-08
4434	chr2	18621531	18621531	1	*	hyper	1.32514e-06
4437	chr2	18627236	18627236	1	*	hyper	4.56972e-10
4439	chr2	18627386	18627386	1	*	hyper	1.66549e-09
4442	chr2	18627685	18627685	1	*	hyper	7.03668e-06
4445	chr2	18629786	18629786	1	*	hyper	5.52344e-07
4447	chr2	18632838	18632838	1	*	hypo	1.90245e-07
4450	chr2	18637212	18637212	1	*	hypo	2.69677e-07
4452	chr2	18681056	18681056	1	*	hypo	8.29591e-07
4454	chr2	18716350	18716350	1	*	hypo	1.88874e-06
4456	chr2	18716783	18716783	1	*	hypo	3.33644e-07
4458	chr2	18749383	18749383	1	*	hypo	2.34415e-07
4461	chr2	18948078	18948078	1	*	hyper	2.7897e-06
4465	chr2	19262944	19262944	1	*	hyper	1.24459e-14
4468	chr2	19271371	19271371	1	*	hyper	1.63902e-14
4470	chr2	19274563	19274563	1	*	hyper	1.53412e-14
4473	chr2	19274579	19274579	1	*	hyper	3.61056e-14
4476	chr2	19304017	19304017	1	*	hyper	1.64165e-06
4478	chr2	19360190	19360190	1	*	hyper	3.20408e-07
4482	chr2	19364238	19364238	1	*	hyper	1.02022e-06
4486	chr2	19390015	19390015	1	*	hyper	6.17521e-08
4490	chr2	19390071	19390071	1	*	hyper	3.00602e-06
4495	chr2	19392589	19392589	1	*	hyper	7.98626e-06
4500	chr2	19405365	19405365	1	*	hyper	1.05977e-07
4504	chr2	19496480	19496480	1	*	hyper	9.25657e-07
4506	chr2	19542248	19542248	1	*	hyper	8.69533e-09
4509	chr2	19547019	19547019	1	*	hyper	1.49099e-06
4511	chr2	19547216	19547216	1	*	hyper	1.0278e-08
4513	chr2	19550295	19550295	1	*	hyper	4.46716e-09
4516	chr2	19552591	19552591	1	*	hyper	2.0037e-10
4519	chr2	19555707	19555707	1	*	hyper	2.00566e-12
4521	chr2	19559763	19559763	1	*	hyper	1.38051e-08
4523	chr2	19560002	19560002	1	*	hyper	6.58008e-09
4525	chr2	19560995	19560995	1	*	hyper	2.49746e-08
4527	chr2	19562861	19562861	1	*	hyper	2.63706e-09
4530	chr2	19564324	19564324	1	*	hyper	9.55858e-10
4533	chr2	19566332	19566332	1	*	hyper	2.36538e-08
4536	chr2	19567052	19567052	1	*	hyper	9.01895e-10
4538	chr2	19567810	19567810	1	*	hyper	3.79284e-10
4541	chr2	19573428	19573428	1	*	hypo	1.15898e-06
4544	chr2	19576768	19576768	1	*	hypo	1.30974e-09
4546	chr2	19595567	19595567	1	*	hyper	8.66671e-10
4549	chr2	19646266	19646266	1	*	hypo	1.26776e-08
4554	chr2	19651624	19651624	1	*	hypo	1.65364e-08
4557	chr2	19652564	19652564	1	*	hypo	1.53804e-08
4560	chr2	19652709	19652709	1	*	hyper	3.02711e-06
4562	chr2	19668002	19668002	1	*	hypo	3.68469e-07
4564	chr2	19669055	19669055	1	*	hyper	7.68319e-13
4567	chr2	19684423	19684423	1	*	hypo	9.65959e-08
4569	chr2	19687831	19687831	1	*	hypo	5.42338e-07
4571	chr2	19700506	19700506	1	*	hypo	2.71342e-10
4574	chr2	19714167	19714167	1	*	hypo	2.81532e-06
4577	chr2	19720084	19720084	1	*	hyper	2.69283e-11
4580	chr2	19727229	19727229	1	*	hypo	3.04703e-11
4583	chr2	19751967	19751967	1	*	hypo	1.20365e-13
4585	chr2	19779632	19779632	1	*	hypo	5.53909e-08
4588	chr2	19967292	19967292	1	*	hypo	1.10353e-06
4590	chr2	20031446	20031446	1	*	hypo	3.65318e-06
4592	chr2	20032848	20032848	1	*	hypo	1.05811e-09
4595	chr2	20111891	20111891	1	*	hyper	1.06943e-09
4597	chr2	20114501	20114501	1	*	hyper	3.39996e-10
4599	chr2	20118949	20118949	1	*	hyper	3.93002e-07
4601	chr2	20124071	20124071	1	*	hyper	2.66107e-09
4603	chr2	20128677	20128677	1	*	hyper	2.702e-09
4606	chr2	20129196	20129196	1	*	hyper	2.30288e-06
4608	chr2	20129541	20129541	1	*	hyper	7.81593e-12
4610	chr2	20138234	20138234	1	*	hyper	3.64971e-12
4612	chr2	20226428	20226428	1	*	hypo	2.0949e-06
4615	chr2	20337455	20337455	1	*	hypo	1.25102e-06
4617	chr2	20385658	20385658	1	*	hypo	1.64165e-06
4619	chr2	20431066	20431066	1	*	hyper	4.14413e-07
4621	chr2	20488815	20488815	1	*	hyper	1.64282e-06
4623	chr2	20855557	20855557	1	*	hyper	2.34827e-07
4626	chr2	20967911	20967911	1	*	hyper	1.52973e-06
4630	chr2	21018285	21018285	1	*	hyper	1.98915e-06
4633	chr2	21212791	21212791	1	*	hyper	1.92567e-09
4636	chr2	21331120	21331120	1	*	hyper	2.99895e-10
4639	chr2	21337487	21337487	1	*	hypo	3.3967e-06
4642	chr2	21462526	21462526	1	*	hyper	8.04389e-07
4644	chr2	21464394	21464394	1	*	hyper	2.61293e-07
4647	chr2	21530002	21530002	1	*	hyper	1.49329e-13
4650	chr2	21553607	21553607	1	*	hypo	3.45431e-08
4652	chr2	21558781	21558781	1	*	hypo	2.50492e-08
4654	chr2	21561056	21561056	1	*	hypo	5.35467e-09
4656	chr2	21562725	21562725	1	*	hypo	4.64364e-09
4658	chr2	21630853	21630853	1	*	hyper	1.46981e-07
4660	chr2	21661135	21661135	1	*	hyper	9.24253e-06
4662	chr2	21705068	21705068	1	*	hyper	7.83093e-07
4664	chr2	21709941	21709941	1	*	hypo	6.82612e-09
4666	chr2	21710743	21710743	1	*	hyper	2.99695e-08
4669	chr2	21767423	21767423	1	*	hypo	4.34971e-06
4673	chr2	21815502	21815502	1	*	hyper	1.31352e-11
4675	chr2	21978297	21978297	1	*	hyper	3.87831e-10
4680	chr2	22207346	22207346	1	*	hypo	5.7279e-07
4682	chr2	22237173	22237173	1	*	hyper	5.35493e-06
4687	chr2	22240964	22240964	1	*	hypo	5.90194e-06
4692	chr2	22252849	22252849	1	*	hypo	1.83592e-07
4697	chr2	22362592	22362592	1	*	hypo	1.82849e-06
4700	chr2	22373011	22373011	1	*	hypo	5.90195e-06
4705	chr2	22547525	22547525	1	*	hypo	2.30861e-06
4710	chr2	22782706	22782706	1	*	hypo	8.93761e-11
4712	chr2	22794265	22794265	1	*	hyper	7.48001e-06
4715	chr2	22808199	22808199	1	*	hypo	2.6174e-07
4718	chr2	22847055	22847055	1	*	hypo	6.58324e-08
4720	chr2	22847576	22847576	1	*	hyper	1.45294e-07
4723	chr2	22858599	22858599	1	*	hyper	4.00993e-06
4726	chr2	23008632	23008632	1	*	hyper	1.81841e-07
4729	chr2	23015376	23015376	1	*	hyper	1.34051e-06
4732	chr2	23149165	23149165	1	*	hypo	7.2404e-07
4734	chr2	23181698	23181698	1	*	hyper	1.64101e-06
4736	chr2	23231410	23231410	1	*	hyper	2.24781e-06
4739	chr2	23233292	23233292	1	*	hyper	2.00813e-06
4742	chr2	23234164	23234164	1	*	hyper	4.36135e-06
4744	chr2	23242978	23242978	1	*	hyper	1.60843e-06
4747	chr2	23243918	23243918	1	*	hyper	1.90152e-07
4750	chr2	23244508	23244508	1	*	hyper	1.18726e-09
4753	chr2	23249573	23249573	1	*	hyper	2.47367e-06
4756	chr2	23250053	23250053	1	*	hyper	1.99729e-08
4759	chr2	23624255	23624255	1	*	hypo	9.35911e-07
4763	chr2	23853684	23853684	1	*	hypo	1.63064e-07
4768	chr2	23961492	23961492	1	*	hyper	1.83709e-07
4771	chr2	24145654	24145654	1	*	hyper	2.19626e-10
4776	chr2	24147965	24147965	1	*	hyper	3.30242e-10
4780	chr2	24151538	24151538	1	*	hypo	3.99069e-06
4784	chr2	24164777	24164777	1	*	hypo	1.24412e-10
4789	chr2	24170428	24170428	1	*	hypo	2.83768e-11
4793	chr2	24172854	24172854	1	*	hyper	6.26268e-06
4798	chr2	24175006	24175006	1	*	hyper	1.3213e-06
4802	chr2	24180634	24180634	1	*	hyper	4.42736e-06
4805	chr2	24258453	24258453	1	*	hyper	2.66227e-06
4808	chr2	24258511	24258511	1	*	hyper	3.75611e-07
4811	chr2	24804400	24804400	1	*	hyper	7.88244e-07
4816	chr2	24863082	24863082	1	*	hypo	1.90588e-07
4818	chr2	26267559	26267559	1	*	hypo	2.47758e-09
4821	chr2	26340711	26340711	1	*	hyper	3.78556e-11
4824	chr2	26596941	26596941	1	*	hypo	1.42581e-07
4827	chr2	27010534	27010534	1	*	hypo	1.95541e-07
4829	chr2	27174756	27174756	1	*	hyper	4.82653e-07
4833	chr2	27227318	27227318	1	*	hyper	1.10905e-07
4837	chr2	30724124	30724124	1	*	hyper	2.03083e-08
4840	chr2	39907854	39907854	1	*	hypo	1.77973e-10
4842	chr2	40070466	40070466	1	*	hyper	3.69923e-07
4844	chr2	40145167	40145167	1	*	hyper	6.78344e-08
4847	chr2	40183798	40183798	1	*	hyper	2.30464e-07
4850	chr2	40276919	40276919	1	*	hyper	2.16107e-06
4852	chr2	40332067	40332067	1	*	hyper	1.47025e-07
4854	chr2	40356230	40356230	1	*	hyper	1.41257e-06
4856	chr2	40369350	40369350	1	*	hyper	1.67484e-06
4858	chr2	41020438	41020438	1	*	hyper	1.92365e-09
4861	chr2	41062891	41062891	1	*	hyper	1.28534e-06
4863	chr2	41422061	41422061	1	*	hypo	1.29834e-06
4865	chr2	42848549	42848549	1	*	hypo	3.85146e-07
4867	chr2	42924332	42924332	1	*	hyper	5.32591e-09
4870	chr2	42925774	42925774	1	*	hyper	1.67481e-09
4873	chr2	43367682	43367682	1	*	hyper	2.84316e-09
4875	chr2	43372931	43372931	1	*	hyper	1.08036e-06
4878	chr2	43606586	43606586	1	*	hypo	1.93102e-06
4882	chr2	43688077	43688077	1	*	hypo	6.78194e-07
4887	chr2	43790849	43790849	1	*	hypo	7.27773e-08
4892	chr2	43831192	43831192	1	*	hyper	3.194e-07
4897	chr2	43856440	43856440	1	*	hyper	8.14512e-07
4902	chr2	43867420	43867420	1	*	hypo	2.58037e-13
4905	chr2	43970601	43970601	1	*	hyper	3.0958e-06
4908	chr2	44068507	44068507	1	*	hyper	7.802e-07
4911	chr2	44136557	44136557	1	*	hyper	6.56353e-07
4915	chr2	44153170	44153170	1	*	hyper	1.14241e-07
4920	chr2	44376511	44376511	1	*	hypo	1.55956e-07
4924	chr2	44428802	44428802	1	*	hyper	5.65945e-07
4927	chr2	44678138	44678138	1	*	hyper	6.99072e-08
4930	chr2	44766045	44766045	1	*	hypo	3.57254e-09
4932	chr2	45023282	45023282	1	*	hypo	2.69528e-06
4934	chr2	45259036	45259036	1	*	hypo	1.29097e-09
4936	chr2	45404676	45404676	1	*	hypo	2.66538e-06
4938	chr2	45546306	45546306	1	*	hyper	9.38042e-07
4941	chr2	45578967	45578967	1	*	hyper	1.91531e-06
4944	chr2	45705950	45705950	1	*	hyper	2.06453e-06
4948	chr2	45909784	45909784	1	*	hypo	1.79584e-06
4951	chr2	45932182	45932182	1	*	hypo	4.52614e-07
4953	chr2	46028462	46028462	1	*	hyper	1.95555e-13
4956	chr2	46028681	46028681	1	*	hyper	4.04542e-09
4959	chr2	46028800	46028800	1	*	hyper	4.85142e-08
4962	chr2	46173282	46173282	1	*	hyper	8.48269e-07
4964	chr2	46614129	46614129	1	*	hypo	1.14113e-09
4967	chr2	46839200	46839200	1	*	hyper	6.331e-10
4969	chr2	46920445	46920445	1	*	hyper	1.41042e-08
4972	chr2	46942134	46942134	1	*	hyper	6.12326e-09
4974	chr2	47046214	47046214	1	*	hyper	5.2335e-07
4976	chr2	47050928	47050928	1	*	hyper	3.32241e-07
4978	chr2	47070735	47070735	1	*	hyper	3.83244e-06
4980	chr2	47093052	47093052	1	*	hyper	1.93775e-06
4982	chr2	47096536	47096536	1	*	hyper	3.23227e-06
4984	chr2	47117177	47117177	1	*	hyper	6.3594e-08
4987	chr2	47291472	47291472	1	*	hyper	1.0893e-06
4991	chr2	47423043	47423043	1	*	hyper	2.55647e-06
4995	chr2	47528154	47528154	1	*	hyper	2.76422e-07
4999	chr2	47593014	47593014	1	*	hyper	3.92341e-06
5002	chr2	47615443	47615443	1	*	hyper	1.94772e-09
5005	chr2	47668066	47668066	1	*	hypo	9.50469e-07
5008	chr2	47678349	47678349	1	*	hypo	8.43223e-08
5010	chr2	47729782	47729782	1	*	hypo	1.72141e-07
5014	chr2	47787760	47787760	1	*	hypo	3.20367e-06
5017	chr2	47942006	47942006	1	*	hyper	2.33465e-06
5019	chr2	48005413	48005413	1	*	hyper	2.10047e-06
5022	chr2	48108386	48108386	1	*	hyper	1.47831e-07
5024	chr2	48110368	48110368	1	*	hyper	5.36959e-07
5027	chr2	48110941	48110941	1	*	hyper	2.84283e-06
5029	chr2	48124607	48124607	1	*	hyper	2.29244e-08
5031	chr2	48140439	48140439	1	*	hyper	2.48663e-07
5033	chr2	48149980	48149980	1	*	hypo	2.96901e-10
5036	chr2	48155089	48155089	1	*	hypo	3.63341e-09
5039	chr2	48175254	48175254	1	*	hypo	1.19174e-09
5041	chr2	48176118	48176118	1	*	hypo	8.471e-08
5043	chr2	48193845	48193845	1	*	hyper	3.0958e-06
5048	chr2	48198182	48198182	1	*	hypo	6.92599e-07
5053	chr2	48260516	48260516	1	*	hypo	1.41253e-08
5058	chr2	48262293	48262293	1	*	hypo	1.26996e-07
5062	chr2	49295452	49295452	1	*	hypo	3.41784e-07
5064	chr2	49414906	49414906	1	*	hypo	1.03629e-09
5067	chr2	49446790	49446790	1	*	hypo	1.27249e-06
5070	chr2	49659509	49659509	1	*	hypo	4.30928e-08
5073	chr2	49836004	49836004	1	*	hyper	1.78603e-07
5075	chr2	49916161	49916161	1	*	hypo	7.2683e-08
5077	chr2	50448013	50448013	1	*	hypo	1.65727e-06
5080	chr2	50534126	50534126	1	*	hypo	7.47402e-08
5082	chr2	50633830	50633830	1	*	hypo	1.55031e-07
5084	chr2	50905245	50905245	1	*	hyper	1.0053e-07
5086	chr2	50911627	50911627	1	*	hyper	1.05052e-08
5088	chr2	50924787	50924787	1	*	hypo	3.0962e-07
5091	chr2	51055203	51055203	1	*	hyper	3.66212e-08
5094	chr2	51831547	51831547	1	*	hyper	1.5614e-08
5097	chr2	51865683	51865683	1	*	hyper	2.18819e-07
5100	chr2	51872538	51872538	1	*	hyper	2.23198e-07
5102	chr2	51978916	51978916	1	*	hypo	1.79339e-09
5104	chr2	52083801	52083801	1	*	hyper	1.04651e-11
5106	chr2	52280586	52280586	1	*	hypo	1.99498e-06
5108	chr2	52303946	52303946	1	*	hyper	1.60371e-06
5110	chr2	52323871	52323871	1	*	hyper	2.56951e-08
5112	chr2	52380313	52380313	1	*	hyper	6.46925e-09
5117	chr2	52448197	52448197	1	*	hyper	2.48482e-08
5121	chr2	53036911	53036911	1	*	hyper	2.54994e-06
5125	chr2	53209190	53209190	1	*	hyper	2.39987e-06
5129	chr2	53214169	53214169	1	*	hyper	4.01713e-11
5133	chr2	53406156	53406156	1	*	hyper	1.37793e-06
5137	chr2	53565705	53565705	1	*	hypo	6.32384e-09
5141	chr2	53598883	53598883	1	*	hyper	5.83251e-08
5145	chr2	53606898	53606898	1	*	hyper	1.03556e-07
5149	chr2	53617683	53617683	1	*	hyper	9.6454e-08
5154	chr2	53758386	53758386	1	*	hyper	1.02429e-06
5159	chr2	53855712	53855712	1	*	hyper	1.53367e-08
5163	chr2	53970511	53970511	1	*	hypo	2.68769e-11
5166	chr2	54230021	54230021	1	*	hypo	8.7855e-07
5169	chr2	54313532	54313532	1	*	hypo	5.67591e-07
5171	chr2	54721379	54721379	1	*	hyper	1.83252e-08
5173	chr2	54721444	54721444	1	*	hyper	2.40409e-06
5175	chr2	54738430	54738430	1	*	hyper	1.69538e-09
5177	chr2	54846306	54846306	1	*	hyper	2.03175e-07
5180	chr2	54850373	54850373	1	*	hyper	3.06848e-08
5182	chr2	55362362	55362362	1	*	hypo	2.73043e-07
5185	chr2	56439906	56439906	1	*	hypo	5.1594e-07
5188	chr2	56583918	56583918	1	*	hyper	7.81985e-07
5191	chr2	56585072	56585072	1	*	hyper	2.42505e-06
5194	chr2	56586225	56586225	1	*	hyper	1.82779e-06
5197	chr2	56749284	56749284	1	*	hypo	6.44288e-09
5199	chr2	56854910	56854910	1	*	hypo	9.79822e-07
5202	chr2	57064639	57064639	1	*	hypo	6.61864e-10
5204	chr2	57077968	57077968	1	*	hypo	3.68971e-07
5207	chr2	57091273	57091273	1	*	hypo	1.63064e-07
5209	chr2	57492329	57492329	1	*	hypo	1.22449e-06
5212	chr2	57612607	57612607	1	*	hypo	2.02285e-07
5215	chr2	57623940	57623940	1	*	hypo	3.22487e-14
5218	chr2	57653481	57653481	1	*	hyper	1.43468e-06
5220	chr2	57659293	57659293	1	*	hypo	2.41951e-07
5222	chr2	57712391	57712391	1	*	hypo	5.67716e-09
5224	chr2	57868587	57868587	1	*	hypo	9.5723e-08
5227	chr2	57968531	57968531	1	*	hypo	6.65117e-11
5229	chr2	57981885	57981885	1	*	hypo	1.11108e-06
5231	chr2	58159266	58159266	1	*	hyper	2.58576e-06
5233	chr2	58356497	58356497	1	*	hypo	4.21591e-07
5237	chr2	58402891	58402891	1	*	hyper	2.13456e-06
5242	chr2	58413426	58413426	1	*	hypo	1.24343e-10
5247	chr2	60432050	60432050	1	*	hypo	7.61244e-07
5249	chr2	61004565	61004565	1	*	hypo	6.16775e-07
5251	chr2	61059330	61059330	1	*	hypo	5.76316e-09
5253	chr2	61153724	61153724	1	*	hyper	8.43293e-07
5256	chr2	61180260	61180260	1	*	hyper	5.15543e-09
5258	chr2	61185468	61185468	1	*	hyper	1.93656e-10
5260	chr2	61252371	61252371	1	*	hypo	1.09631e-13
5265	chr2	61414870	61414870	1	*	hypo	1.37063e-06
5269	chr2	61523500	61523500	1	*	hypo	1.3567e-06
5273	chr2	61766903	61766903	1	*	hypo	8.16837e-07
5275	chr2	61803052	61803052	1	*	hypo	7.22276e-07
5277	chr2	61837578	61837578	1	*	hypo	2.29757e-07
5280	chr2	62587334	62587334	1	*	hypo	2.37748e-07
5285	chr2	62728850	62728850	1	*	hyper	3.94603e-07
5289	chr2	62731438	62731438	1	*	hypo	5.69346e-09
5293	chr2	62838918	62838918	1	*	hyper	3.92219e-08
5297	chr2	62855706	62855706	1	*	hyper	2.30305e-07
5301	chr2	64652669	64652669	1	*	hypo	6.00767e-11
5304	chr2	64681632	64681632	1	*	hypo	2.09867e-08
5307	chr2	64681842	64681842	1	*	hypo	4.56691e-08
5309	chr2	64690684	64690684	1	*	hypo	1.08161e-07
5312	chr2	65875366	65875366	1	*	hypo	1.53176e-07
5315	chr2	65913650	65913650	1	*	hypo	5.12508e-07
5317	chr2	66175694	66175694	1	*	hyper	3.71999e-08
5320	chr2	67900346	67900346	1	*	hyper	7.06352e-08
5322	chr2	68027056	68027056	1	*	hyper	4.83042e-08
5325	chr2	69847341	69847341	1	*	hypo	6.18051e-07
5328	chr2	70662719	70662719	1	*	hypo	4.5396e-07
5331	chr2	70890037	70890037	1	*	hyper	9.80486e-08
5333	chr2	71057724	71057724	1	*	hypo	9.68854e-11
5338	chr2	71103840	71103840	1	*	hypo	6.399e-08
5341	chr2	71148137	71148137	1	*	hyper	4.90243e-07
5346	chr2	72752065	72752065	1	*	hyper	9.44414e-07
5351	chr2	73112447	73112447	1	*	hypo	3.18482e-07
5355	chr2	73165561	73165561	1	*	hypo	2.10716e-06
5359	chr2	74407096	74407096	1	*	hypo	7.2298e-08
5361	chr2	74831862	74831862	1	*	hypo	8.43943e-07
5364	chr2	75038189	75038189	1	*	hyper	6.40068e-07
5366	chr2	75088186	75088186	1	*	hypo	3.77935e-09
5368	chr2	75106305	75106305	1	*	hyper	1.62394e-06
5371	chr2	75557050	75557050	1	*	hyper	1.01333e-06
5374	chr2	76303486	76303486	1	*	hypo	1.77035e-06
5377	chr2	76367923	76367923	1	*	hypo	1.03739e-08
5380	chr2	76374598	76374598	1	*	hypo	9.14999e-08
5383	chr2	76374759	76374759	1	*	hypo	5.67191e-09
5386	chr2	76380655	76380655	1	*	hyper	2.67517e-07
5388	chr2	76384300	76384300	1	*	hyper	5.68765e-07
5391	chr2	76387319	76387319	1	*	hyper	1.70086e-07
5394	chr2	76435384	76435384	1	*	hyper	1.66621e-07
5396	chr2	76445563	76445563	1	*	hyper	1.95656e-06
5398	chr2	76446802	76446802	1	*	hyper	5.47635e-08
5400	chr2	76534387	76534387	1	*	hypo	7.63411e-08
5403	chr2	76553040	76553040	1	*	hypo	4.97484e-07
5406	chr2	76557110	76557110	1	*	hypo	1.04926e-08
5409	chr2	76558588	76558588	1	*	hypo	1.07976e-06
5412	chr2	76582501	76582501	1	*	hyper	3.05741e-09
5414	chr2	77014444	77014444	1	*	hypo	1.6458e-06
5417	chr2	77097421	77097421	1	*	hypo	3.8976e-08
5419	chr2	77255320	77255320	1	*	hypo	2.2085e-06
5421	chr2	77289459	77289459	1	*	hypo	1.22005e-06
5423	chr2	77316127	77316127	1	*	hypo	5.42366e-08
5426	chr2	77355549	77355549	1	*	hypo	1.77454e-12
5429	chr2	77393973	77393973	1	*	hypo	3.82507e-07
5431	chr2	77829294	77829294	1	*	hypo	2.19337e-08
5434	chr2	78823801	78823801	1	*	hypo	1.40702e-07
5437	chr2	79036527	79036527	1	*	hyper	3.16502e-06
5439	chr2	79082633	79082633	1	*	hyper	4.47861e-10
5441	chr2	79083881	79083881	1	*	hyper	1.95988e-06
5443	chr2	79090875	79090875	1	*	hyper	8.67103e-07
5445	chr2	79099709	79099709	1	*	hyper	1.31252e-07
5448	chr2	79111487	79111487	1	*	hyper	3.44579e-06
5451	chr2	79434137	79434137	1	*	hypo	1.25556e-08
5455	chr2	79436621	79436621	1	*	hypo	6.08868e-10
5459	chr2	79437839	79437839	1	*	hypo	1.00734e-08
5464	chr2	79446816	79446816	1	*	hypo	4.5485e-12
5468	chr2	79469260	79469260	1	*	hypo	2.51421e-08
5473	chr2	79476734	79476734	1	*	hypo	6.84613e-08
5478	chr2	79485878	79485878	1	*	hypo	4.47625e-07
5480	chr2	79488193	79488193	1	*	hypo	9.51449e-08
5482	chr2	79492267	79492267	1	*	hypo	7.75008e-07
5485	chr2	79518809	79518809	1	*	hypo	2.44699e-06
5487	chr2	79542524	79542524	1	*	hypo	3.63876e-09
5492	chr2	79591609	79591609	1	*	hypo	5.86969e-07
5496	chr2	79609126	79609126	1	*	hypo	1.39318e-10
5501	chr2	79613663	79613663	1	*	hypo	3.11114e-07
5505	chr2	79618026	79618026	1	*	hypo	4.5455e-10
5509	chr2	79618060	79618060	1	*	hypo	1.62283e-10
5514	chr2	80006401	80006401	1	*	hyper	2.73711e-06
5516	chr2	80016741	80016741	1	*	hyper	2.44626e-08
5519	chr2	80034473	80034473	1	*	hyper	9.66241e-09
5521	chr2	80249359	80249359	1	*	hyper	2.57967e-08
5523	chr2	80292724	80292724	1	*	hyper	2.58816e-06
5525	chr2	80380399	80380399	1	*	hyper	9.8695e-07
5527	chr2	80464340	80464340	1	*	hypo	9.9312e-07
5529	chr2	80486275	80486275	1	*	hypo	2.15567e-08
5532	chr2	80513826	80513826	1	*	hypo	2.10799e-06
5535	chr2	80531174	80531174	1	*	hypo	7.67508e-09
5537	chr2	80544889	80544889	1	*	hypo	1.1091e-07
5539	chr2	80892950	80892950	1	*	hyper	1.35538e-07
5543	chr2	81642387	81642387	1	*	hyper	1.29288e-07
5546	chr2	82400973	82400973	1	*	hypo	1.88041e-06
5549	chr2	82663136	82663136	1	*	hypo	1.32018e-06
5552	chr2	83516762	83516762	1	*	hypo	1.28206e-06
5555	chr2	83534993	83534993	1	*	hypo	1.28179e-06
5557	chr2	83624164	83624164	1	*	hypo	2.41956e-06
5559	chr2	83632588	83632588	1	*	hypo	3.60174e-10
5562	chr2	83635669	83635669	1	*	hypo	2.48794e-07
5565	chr2	83644435	83644435	1	*	hyper	2.04912e-06
5568	chr2	83730700	83730700	1	*	hypo	6.44654e-07
5571	chr2	83841491	83841491	1	*	hyper	2.94767e-06
5573	chr2	84210780	84210780	1	*	hypo	3.50575e-07
5575	chr2	84279672	84279672	1	*	hypo	1.68087e-06
5578	chr2	84454502	84454502	1	*	hypo	3.59828e-06
5582	chr2	84536114	84536114	1	*	hyper	1.57348e-09
5586	chr2	84539442	84539442	1	*	hyper	1.67431e-07
5591	chr2	84547458	84547458	1	*	hyper	1.49922e-07
5596	chr2	84826803	84826803	1	*	hypo	1.51935e-06
5599	chr2	85189729	85189729	1	*	hypo	1.32467e-09
5601	chr2	85721950	85721950	1	*	hypo	1.35229e-12
5604	chr2	85725779	85725779	1	*	hypo	1.203e-08
5606	chr2	85726562	85726562	1	*	hyper	5.72051e-12
5609	chr2	85741246	85741246	1	*	hypo	2.28153e-08
5612	chr2	85749718	85749718	1	*	hyper	1.81173e-07
5614	chr2	85750614	85750614	1	*	hypo	9.4137e-09
5617	chr2	85757059	85757059	1	*	hyper	4.57275e-11
5619	chr2	85757101	85757101	1	*	hyper	4.49521e-08
5621	chr2	85759163	85759163	1	*	hyper	7.86368e-09
5624	chr2	85759259	85759259	1	*	hyper	7.57879e-08
5627	chr2	85759915	85759915	1	*	hyper	1.08615e-08
5630	chr2	85806114	85806114	1	*	hyper	3.56016e-09
5632	chr2	86109401	86109401	1	*	hyper	6.78185e-10
5637	chr2	86283214	86283214	1	*	hypo	3.69641e-10
5642	chr2	86341863	86341863	1	*	hypo	2.1361e-07
5647	chr2	86450881	86450881	1	*	hypo	1.46388e-10
5651	chr2	86557800	86557800	1	*	hypo	1.46878e-08
5655	chr2	86566817	86566817	1	*	hypo	5.6644e-13
5659	chr2	86567139	86567139	1	*	hypo	2.76877e-12
5663	chr2	86617731	86617731	1	*	hypo	2.51591e-12
5667	chr2	86619226	86619226	1	*	hypo	1.49519e-11
5672	chr2	86998891	86998891	1	*	hypo	8.76197e-10
5674	chr2	87086331	87086331	1	*	hyper	7.08662e-07
5677	chr2	87218020	87218020	1	*	hyper	4.00984e-08
5680	chr2	87244570	87244570	1	*	hyper	3.06521e-07
5682	chr2	87342634	87342634	1	*	hyper	1.45905e-06
5684	chr2	87535436	87535436	1	*	hypo	4.34103e-08
5687	chr2	87535689	87535689	1	*	hypo	1.25782e-06
5690	chr2	87619123	87619123	1	*	hyper	1.07508e-08
5693	chr2	87641285	87641285	1	*	hyper	8.00259e-06
5695	chr2	87789041	87789041	1	*	hyper	5.04216e-06
5698	chr2	88025802	88025802	1	*	hyper	6.62684e-07
5702	chr2	88242488	88242488	1	*	hypo	6.89757e-09
5705	chr2	88281744	88281744	1	*	hypo	2.10884e-07
5708	chr2	88294625	88294625	1	*	hyper	5.44316e-07
5711	chr2	88521244	88521244	1	*	hypo	8.34674e-10
5715	chr2	88563772	88563772	1	*	hypo	2.20389e-08
5718	chr2	88719538	88719538	1	*	hypo	7.58743e-06
5721	chr2	88739084	88739084	1	*	hypo	8.44395e-07
5724	chr2	88739150	88739150	1	*	hypo	2.76847e-06
5727	chr2	88757120	88757120	1	*	hypo	3.48222e-07
5730	chr2	88760696	88760696	1	*	hypo	2.33237e-06
5732	chr2	88770802	88770802	1	*	hypo	1.60503e-07
5735	chr2	88823845	88823845	1	*	hypo	2.1929e-06
5738	chr2	88882719	88882719	1	*	hyper	8.0818e-07
5742	chr2	89140526	89140526	1	*	hypo	6.71619e-06
5747	chr2	89238274	89238274	1	*	hyper	2.90214e-06
5750	chr2	89246652	89246652	1	*	hyper	8.35606e-07
5752	chr2	89263149	89263149	1	*	hyper	2.76029e-06
5755	chr2	89358370	89358370	1	*	hypo	1.05163e-06
5758	chr2	89358489	89358489	1	*	hypo	3.02736e-06
5760	chr2	89359586	89359586	1	*	hyper	3.062e-06
5762	chr2	89425592	89425592	1	*	hypo	2.97732e-06
5767	chr2	89434040	89434040	1	*	hypo	6.04769e-06
5771	chr2	89572282	89572282	1	*	hyper	5.32175e-06
5775	chr2	89737910	89737910	1	*	hypo	2.39962e-06
5780	chr2	89822815	89822815	1	*	hyper	1.63171e-06
5783	chr2	89845058	89845058	1	*	hyper	3.53692e-08
5786	chr2	89846067	89846067	1	*	hyper	1.7452e-07
5788	chr2	89859979	89859979	1	*	hyper	1.29136e-07
5791	chr2	89860256	89860256	1	*	hyper	2.32673e-07
5794	chr2	89875208	89875208	1	*	hyper	5.53172e-08
5799	chr2	89879289	89879289	1	*	hyper	3.20403e-09
5803	chr2	89881366	89881366	1	*	hyper	5.82869e-07
5808	chr2	89894328	89894328	1	*	hypo	5.89328e-06
5810	chr2	89894489	89894489	1	*	hypo	1.427e-08
5812	chr2	89897580	89897580	1	*	hypo	1.36327e-09
5814	chr2	89904126	89904126	1	*	hyper	6.6115e-10
5818	chr2	89904759	89904759	1	*	hyper	9.05238e-09
5822	chr2	89917540	89917540	1	*	hyper	2.42458e-10
5827	chr2	89918729	89918729	1	*	hyper	1.22773e-14
5832	chr2	89924119	89924119	1	*	hyper	1.20322e-10
5837	chr2	89934420	89934420	1	*	hyper	7.27358e-08
5839	chr2	89942572	89942572	1	*	hyper	3.34323e-07
5844	chr2	89944446	89944446	1	*	hyper	4.58246e-07
5849	chr2	89958904	89958904	1	*	hyper	2.64407e-09
5854	chr2	89967588	89967588	1	*	hyper	9.11615e-10
5858	chr2	89974784	89974784	1	*	hyper	3.94263e-14
5862	chr2	89975117	89975117	1	*	hyper	8.80736e-13
5866	chr2	89975368	89975368	1	*	hyper	1.51908e-14
5870	chr2	89979288	89979288	1	*	hyper	1.92424e-14
5875	chr2	89979498	89979498	1	*	hyper	2.8971e-09
5880	chr2	89980572	89980572	1	*	hyper	8.5293e-11
5884	chr2	89987394	89987394	1	*	hyper	1.25576e-06
5888	chr2	89988889	89988889	1	*	hyper	3.8467e-08
5892	chr2	89990749	89990749	1	*	hyper	8.7379e-11
5896	chr2	89992017	89992017	1	*	hyper	1.018e-10
5900	chr2	90020431	90020431	1	*	hyper	6.49987e-09
5905	chr2	90047121	90047121	1	*	hyper	1.66132e-08
5910	chr2	90067682	90067682	1	*	hyper	1.21963e-08
5915	chr2	90373806	90373806	1	*	hypo	2.95904e-09
5917	chr2	90405192	90405192	1	*	hypo	1.2375e-07
5920	chr2	90414536	90414536	1	*	hypo	4.26285e-08
5922	chr2	90466037	90466037	1	*	hypo	1.01548e-06
5924	chr2	90471457	90471457	1	*	hypo	1.5775e-12
5926	chr2	90474522	90474522	1	*	hypo	4.73346e-07
5929	chr2	90481968	90481968	1	*	hypo	1.13197e-08
5931	chr2	90482082	90482082	1	*	hypo	8.27655e-07
5933	chr2	90483415	90483415	1	*	hypo	5.96604e-07
5935	chr2	90483459	90483459	1	*	hypo	1.29291e-08
5938	chr2	90485883	90485883	1	*	hypo	8.99559e-10
5941	chr2	90486073	90486073	1	*	hypo	4.34879e-12
5944	chr2	90487055	90487055	1	*	hypo	1.79292e-08
5947	chr2	90487512	90487512	1	*	hypo	1.47222e-08
5950	chr2	90487577	90487577	1	*	hypo	3.98314e-10
5953	chr2	90494130	90494130	1	*	hypo	1.46673e-08
5955	chr2	90499121	90499121	1	*	hypo	8.85266e-12
5957	chr2	90506769	90506769	1	*	hypo	4.89291e-09
5959	chr2	90536493	90536493	1	*	hypo	2.18987e-07
5961	chr2	90640711	90640711	1	*	hyper	6.42669e-06
5966	chr2	90669595	90669595	1	*	hypo	8.17288e-06
5970	chr2	90709231	90709231	1	*	hyper	6.22312e-06
5975	chr2	90715797	90715797	1	*	hyper	8.87095e-06
5979	chr2	90724949	90724949	1	*	hypo	9.18335e-11
5984	chr2	90768960	90768960	1	*	hyper	4.00572e-06
5987	chr2	90909530	90909530	1	*	hypo	2.4829e-06
5991	chr2	90912099	90912099	1	*	hypo	7.17908e-09
5995	chr2	91028024	91028024	1	*	hypo	1.62097e-06
5997	chr2	91551386	91551386	1	*	hyper	7.98171e-06
6001	chr2	91593008	91593008	1	*	hyper	6.91563e-06
6006	chr2	91674035	91674035	1	*	hypo	4.26776e-07
6009	chr2	91702172	91702172	1	*	hyper	2.47425e-06
6012	chr2	91705715	91705715	1	*	hyper	1.61334e-06
6015	chr2	91712552	91712552	1	*	hyper	6.89819e-07
6017	chr2	91753862	91753862	1	*	hypo	7.76714e-09
6020	chr2	91770542	91770542	1	*	hyper	3.45758e-06
6024	chr2	91792832	91792832	1	*	hyper	6.15122e-06
6027	chr2	91822575	91822575	1	*	hypo	5.83256e-07
6030	chr2	91960760	91960760	1	*	hyper	3.66088e-06
6033	chr2	92015333	92015333	1	*	hypo	4.46244e-09
6035	chr2	92027745	92027745	1	*	hypo	6.90927e-06
6038	chr2	92030229	92030229	1	*	hypo	7.17564e-12
6041	chr2	92031081	92031081	1	*	hypo	2.58745e-06
6044	chr2	92032006	92032006	1	*	hypo	2.04673e-07
6046	chr2	92150941	92150941	1	*	hypo	2.609e-06
6051	chr2	92507881	92507881	1	*	hypo	3.20663e-06
6053	chr2	92514355	92514355	1	*	hypo	2.70089e-06
6056	chr2	92550540	92550540	1	*	hypo	5.67893e-07
6058	chr2	92614128	92614128	1	*	hyper	1.35327e-08
6061	chr2	92882034	92882034	1	*	hypo	7.36952e-08
6064	chr2	92939055	92939055	1	*	hypo	8.80411e-09
6067	chr2	93087847	93087847	1	*	hyper	5.11038e-08
6069	chr2	93088940	93088940	1	*	hyper	7.8492e-07
6072	chr2	93427165	93427165	1	*	hypo	7.27041e-07
6075	chr2	93532879	93532879	1	*	hyper	1.49174e-08
6079	chr2	93577178	93577178	1	*	hypo	8.47179e-08
6082	chr2	93617880	93617880	1	*	hyper	2.22437e-08
6084	chr2	93983424	93983424	1	*	hypo	2.81648e-07
6086	chr2	94380117	94380117	1	*	hyper	1.48756e-07
6091	chr2	94382650	94382650	1	*	hyper	5.86674e-07
6096	chr2	96286082	96286082	1	*	hyper	8.44513e-07
6100	chr2	96378437	96378437	1	*	hypo	2.99521e-07
6102	chr2	96394188	96394188	1	*	hypo	3.53803e-07
6106	chr2	97352484	97352484	1	*	hyper	1.86639e-08
6108	chr2	97433132	97433132	1	*	hyper	4.29477e-08
6112	chr2	97660904	97660904	1	*	hypo	3.70458e-07
6116	chr2	99038017	99038017	1	*	hypo	9.3988e-07
6119	chr2	104973528	104973528	1	*	hyper	2.47454e-08
6122	chr2	108703153	108703153	1	*	hypo	1.09754e-07
6125	chr2	108820404	108820404	1	*	hypo	5.64586e-07
[truncated: 20,862 more rows]
