# Supplementary material for: Genome-Wide DNA Methylation and Transcriptome Integration Associates DNA Methylation Changes with Bovine Subclinical Mastitis Caused by Staphylococcus chromogenes
Source: Int J Mol Sci. 2023 Jun 20;24(12):10369. doi: 10.3390/ijms241210369 (PMC10299661; doi:10.3390/ijms241210369)
Supplement: Supplementary file 1 [file ijms-24-10369-s001.zip › TableS5 The distribution of differentially methylated cytosine sites among chromosomes and genic structures.xlsx]

## Sheet: TableS5A_DMC_count_chr_summary
Table S5A The distribution of differentially methylated cytosine sites among chromosomes
	chr	hyper_CHG	hyper_CHH	hyper_CpG	hypo_CHG	hypo_CHH	hypo_CpG	hyper_%	hyper_CpG%	hyper_CHG%	hyper_CHH%	total DMCs	total CpG
11	chr19	190	408	80403	159	379	25367	0.757684	0.760168	0.544413	0.518424	106906	105770
3	chr11	148	502	79455	150	497	26007	0.750335	0.753399	0.496644	0.502503	106759	105462
25	chr5	123	566	76722	106	417	23469	0.7634	0.765757	0.537118	0.575788	101403	100191
23	chr3	132	509	74340	160	475	22251	0.766152	0.769637	0.452055	0.517276	97867	96591
5	chr13	146	456	70658	113	341	21649	0.763257	0.765467	0.563707	0.572146	93363	92307
27	chr7	90	296	71514	72	285	20397	0.776005	0.778079	0.555556	0.509466	92654	91911
10	chr18	134	293	70822	113	260	20583	0.772724	0.774815	0.54251	0.529837	92205	91405
1	chr1	289	794	63777	179	566	23697	0.7263	0.729097	0.617521	0.583824	89302	87474
12	chr2	191	525	65514	115	427	21742	0.748243	0.750825	0.624183	0.551471	88514	87256
8	chr16	179	491	63502	144	390	19370	0.763262	0.766266	0.55418	0.557321	84076	82872
9	chr17	264	697	59583	200	571	18763	0.756063	0.760511	0.568966	0.549685	80078	78346
18	chr25	159	371	59677	127	390	15752	0.787267	0.791168	0.555944	0.487516	76476	75429
2	chr10	134	391	55913	74	289	18769	0.746831	0.748681	0.644231	0.575	75570	74682
24	chr4	149	650	56636	146	437	16983	0.76579	0.769312	0.505085	0.597976	75001	73619
15	chr22	69	209	54833	45	166	18423	0.747318	0.748512	0.605263	0.557333	73745	73256
28	chr8	77	311	54136	54	225	16356	0.766228	0.767974	0.587786	0.580224	71159	70492
29	chr9	248	708	48141	212	699	17887	0.723131	0.7291	0.53913	0.503198	67895	66028
7	chr15	162	495	49760	137	439	15799	0.754836	0.759011	0.541806	0.529979	66792	65559
14	chr21	74	202	50487	69	216	15592	0.76175	0.76404	0.517483	0.483254	66640	66079
26	chr6	144	557	49459	114	419	15436	0.758517	0.762139	0.55814	0.570697	66129	64895
16	chr23	72	186	47923	72	183	17281	0.733159	0.73497	0.5	0.504065	65717	65204
6	chr14	93	330	50104	72	231	14201	0.776968	0.779162	0.563636	0.588235	65031	64305
4	chr12	160	437	47358	157	386	14466	0.761626	0.766013	0.504732	0.530984	62964	61824
22	chr29	90	269	45552	65	210	11650	0.793814	0.796336	0.580645	0.561587	57836	57202
17	chr24	63	179	41313	47	163	12401	0.767179	0.769129	0.572727	0.523392	54166	53714
19	chr26	237	665	39377	214	554	12241	0.755874	0.762854	0.525499	0.545529	53288	51618
13	chr20	66	205	37300	59	187	10924	0.770829	0.773474	0.528	0.522959	48741	48224
20	chr27	76	225	29590	79	243	9343	0.755663	0.760024	0.490323	0.480769	39556	38933
21	chr28	74	173	27223	50	148	8676	0.755833	0.758322	0.596774	0.538941	36344	35899
627	chrX	50	250	19242	57	178	5035	0.787603	0.792602	0.46729	0.584112	24812	24277
	scaffolds	26	66	4614	24	73	1044	0.804857	0.815483	0.52	0.47482	5847	5658
	average							0.761887	0.765236	0.54714	0.538978	70543.1	69563.9
53	chrUn_NW_020190209v1	2	0	347	1	2	33	0.906494	0.913158	0.666667	0	385	380
626	chrUn_NW_020192294v1	1	1	206	1	0	33	0.859504	0.861925	0.5	1	242	239
440	chrUn_NW_020191629v1	0	0	131	0	0	75	0.635922	0.635922	#DIV/0!	#DIV/0!	206	206
550	chrUn_NW_020192051v1	0	1	127	0	1	58	0.684492	0.686486	#DIV/0!	0.5	187	185
328	chrUn_NW_020191223v1	0	1	147	0	1	33	0.813187	0.816667	#DIV/0!	0.5	182	180
625	chrUn_NW_020192292v1	2	0	148	0	0	26	0.852273	0.850575	1	#DIV/0!	176	174
352	chrUn_NW_020191298v1	2	13	118	0	1	25	0.836478	0.825175	1	0.928571	159	143
419	chrUn_NW_020191540v1	0	0	136	0	0	18	0.883117	0.883117	#DIV/0!	#DIV/0!	154	154
106	chrUn_NW_020190439v1	2	2	137	0	0	12	0.921569	0.919463	1	1	153	149
126	chrUn_NW_020190496v1	0	0	123	0	0	21	0.854167	0.854167	#DIV/0!	#DIV/0!	144	144
270	chrUn_NW_020190994v1	1	6	85	0	3	25	0.766667	0.772727	1	0.666667	120	110
611	chrUn_NW_020192254v1	1	4	84	0	0	21	0.809091	0.8	1	1	110	105
624	chrUn_NW_020192291v1	0	0	84	0	1	9	0.893617	0.903226	#DIV/0!	0	94	93
621	chrUn_NW_020192288v1	0	0	80	0	0	11	0.879121	0.879121	#DIV/0!	#DIV/0!	91	91
402	chrUn_NW_020191471v1	0	1	68	0	0	9	0.884615	0.883117	#DIV/0!	1	78	77
346	chrUn_NW_020191262v1	0	0	71	0	0	0	1	1	#DIV/0!	#DIV/0!	71	71
240	chrUn_NW_020190893v1	0	0	56	2	5	8	0.788732	0.875	0	0	71	64
566	chrUn_NW_020192089v1	0	0	50	1	0	17	0.735294	0.746269	0	#DIV/0!	68	67
623	chrUn_NW_020192290v1	0	0	56	0	0	2	0.965517	0.965517	#DIV/0!	#DIV/0!	58	58
612	chrUn_NW_020192258v1	1	0	31	0	0	25	0.561404	0.553571	1	#DIV/0!	57	56
164	chrUn_NW_020190613v1	0	0	54	0	0	2	0.964286	0.964286	#DIV/0!	#DIV/0!	56	56
585	chrUn_NW_020192147v1	0	1	47	1	0	5	0.888889	0.903846	0	1	54	52
322	chrUn_NW_020191195v1	0	0	46	0	0	3	0.938776	0.938776	#DIV/0!	#DIV/0!	49	49
411	chrUn_NW_020191512v1	0	0	44	0	0	4	0.916667	0.916667	#DIV/0!	#DIV/0!	48	48
408	chrUn_NW_020191494v1	0	1	40	0	0	6	0.87234	0.869565	#DIV/0!	1	47	46
574	chrUn_NW_020192122v1	0	0	28	0	0	16	0.636364	0.636364	#DIV/0!	#DIV/0!	44	44
228	chrUn_NW_020190851v1	0	0	40	0	0	3	0.930233	0.930233	#DIV/0!	#DIV/0!	43	43
389	chrUn_NW_020191436v1	0	0	22	0	0	21	0.511628	0.511628	#DIV/0!	#DIV/0!	43	43
174	chrUn_NW_020190675v1	0	0	20	1	0	18	0.512821	0.526316	0	#DIV/0!	39	38
117	chrUn_NW_020190467v1	0	0	35	0	0	3	0.921053	0.921053	#DIV/0!	#DIV/0!	38	38
335	chrUn_NW_020191238v1	0	3	26	1	0	8	0.763158	0.764706	0	1	38	34
302	chrUn_NW_020191098v1	0	0	26	0	0	11	0.702703	0.702703	#DIV/0!	#DIV/0!	37	37
221	chrUn_NW_020190826v1	0	0	28	3	2	4	0.756757	0.875	0	0	37	32
127	chrUn_NW_020190499v1	0	0	25	0	0	11	0.694444	0.694444	#DIV/0!	#DIV/0!	36	36
424	chrUn_NW_020191578v1	0	7	9	0	1	19	0.444444	0.321429	#DIV/0!	0.875	36	28
235	chrUn_NW_020190874v1	0	0	23	0	0	11	0.676471	0.676471	#DIV/0!	#DIV/0!	34	34
297	chrUn_NW_020191085v1	1	0	25	0	0	7	0.787879	0.78125	1	#DIV/0!	33	32
210	chrUn_NW_020190791v1	0	1	25	0	3	2	0.83871	0.925926	#DIV/0!	0.25	31	27
489	chrUn_NW_020191822v1	0	0	28	0	0	2	0.933333	0.933333	#DIV/0!	#DIV/0!	30	30
576	chrUn_NW_020192125v1	0	0	27	0	0	2	0.931034	0.931034	#DIV/0!	#DIV/0!	29	29
399	chrUn_NW_020191467v1	0	0	27	0	0	1	0.964286	0.964286	#DIV/0!	#DIV/0!	28	28
231	chrUn_NW_020190858v1	0	0	21	0	0	6	0.777778	0.777778	#DIV/0!	#DIV/0!	27	27
156	chrUn_NW_020190592v1	0	0	25	0	0	1	0.961538	0.961538	#DIV/0!	#DIV/0!	26	26
494	chrUn_NW_020191836v1	0	0	22	0	0	3	0.88	0.88	#DIV/0!	#DIV/0!	25	25
601	chrUn_NW_020192222v1	0	0	22	0	0	3	0.88	0.88	#DIV/0!	#DIV/0!	25	25
313	chrUn_NW_020191148v1	0	0	13	0	0	11	0.541667	0.541667	#DIV/0!	#DIV/0!	24	24
421	chrUn_NW_020191542v1	0	0	23	0	0	0	1	1	#DIV/0!	#DIV/0!	23	23
423	chrUn_NW_020191576v1	0	0	23	0	0	0	1	1	#DIV/0!	#DIV/0!	23	23
430	chrUn_NW_020191608v1	0	0	16	0	1	6	0.695652	0.727273	#DIV/0!	0	23	22
80	chrUn_NW_020190346v1	0	0	22	0	0	0	1	1	#DIV/0!	#DIV/0!	22	22
287	chrUn_NW_020191050v1	0	0	20	0	0	1	0.952381	0.952381	#DIV/0!	#DIV/0!	21	21
367	chrUn_NW_020191356v1	0	0	19	0	0	2	0.904762	0.904762	#DIV/0!	#DIV/0!	21	21
418	chrUn_NW_020191539v1	1	1	18	0	0	1	0.952381	0.947368	1	1	21	19
190	chrUn_NW_020190727v1	0	0	13	1	7	0	0.619048	1	0	0	21	13
507	chrUn_NW_020191870v1	0	0	19	0	0	1	0.95	0.95	#DIV/0!	#DIV/0!	20	20
539	chrUn_NW_020192012v1	1	2	13	0	0	4	0.8	0.764706	1	1	20	17
76	chrUn_NW_020190342v1	1	0	8	0	0	9	0.5	0.470588	1	#DIV/0!	18	17
622	chrUn_NW_020192289v1	0	1	15	0	0	2	0.888889	0.882353	#DIV/0!	1	18	17
102	chrUn_NW_020190428v1	0	0	9	1	2	5	0.529412	0.642857	0	0	17	14
157	chrUn_NW_020190594v1	0	0	12	0	0	4	0.75	0.75	#DIV/0!	#DIV/0!	16	16
594	chrUn_NW_020192190v1	0	0	16	0	0	0	1	1	#DIV/0!	#DIV/0!	16	16
67	chrUn_NW_020190279v1	0	0	11	0	0	4	0.733333	0.733333	#DIV/0!	#DIV/0!	15	15
504	chrUn_NW_020191864v1	0	0	11	0	0	4	0.733333	0.733333	#DIV/0!	#DIV/0!	15	15
131	chrUn_NW_020190506v1	0	0	9	0	0	5	0.642857	0.642857	#DIV/0!	#DIV/0!	14	14
215	chrUn_NW_020190807v1	0	0	14	0	0	0	1	1	#DIV/0!	#DIV/0!	14	14
291	chrUn_NW_020191059v1	0	0	12	0	0	2	0.857143	0.857143	#DIV/0!	#DIV/0!	14	14
341	chrUn_NW_020191249v1	0	0	9	0	0	5	0.642857	0.642857	#DIV/0!	#DIV/0!	14	14
275	chrUn_NW_020191002v1	0	0	9	1	3	1	0.642857	0.9	0	0	14	10
148	chrUn_NW_020190554v1	0	0	13	0	0	0	1	1	#DIV/0!	#DIV/0!	13	13
540	chrUn_NW_020192015v1	0	0	3	0	0	10	0.230769	0.230769	#DIV/0!	#DIV/0!	13	13
316	chrUn_NW_020191160v1	0	0	5	0	0	7	0.416667	0.416667	#DIV/0!	#DIV/0!	12	12
347	chrUn_NW_020191263v1	0	0	1	0	0	11	0.0833333	0.0833333	#DIV/0!	#DIV/0!	12	12
370	chrUn_NW_020191361v1	0	0	10	0	2	0	0.833333	1	#DIV/0!	0	12	10
83	chrUn_NW_020190357v1	0	0	11	0	0	0	1	1	#DIV/0!	#DIV/0!	11	11
135	chrUn_NW_020190518v1	0	0	11	0	0	0	1	1	#DIV/0!	#DIV/0!	11	11
442	chrUn_NW_020191637v1	0	0	11	0	0	0	1	1	#DIV/0!	#DIV/0!	11	11
477	chrUn_NW_020191779v1	0	0	11	0	0	0	1	1	#DIV/0!	#DIV/0!	11	11
516	chrUn_NW_020191908v1	0	0	11	0	0	0	1	1	#DIV/0!	#DIV/0!	11	11
151	chrUn_NW_020190567v1	0	0	7	1	0	3	0.636364	0.7	0	#DIV/0!	11	10
114	chrUn_NW_020190459v1	0	2	5	0	0	4	0.636364	0.555556	#DIV/0!	1	11	9
37	chrUn_NW_020190139v1	0	0	6	0	0	4	0.6	0.6	#DIV/0!	#DIV/0!	10	10
60	chrUn_NW_020190231v1	0	0	10	0	0	0	1	1	#DIV/0!	#DIV/0!	10	10
100	chrUn_NW_020190421v1	0	0	7	0	0	3	0.7	0.7	#DIV/0!	#DIV/0!	10	10
107	chrUn_NW_020190445v1	0	0	10	0	0	0	1	1	#DIV/0!	#DIV/0!	10	10
197	chrUn_NW_020190741v1	0	0	1	0	0	9	0.1	0.1	#DIV/0!	#DIV/0!	10	10
200	chrUn_NW_020190755v1	0	0	10	0	0	0	1	1	#DIV/0!	#DIV/0!	10	10
213	chrUn_NW_020190798v1	0	0	10	0	0	0	1	1	#DIV/0!	#DIV/0!	10	10
317	chrUn_NW_020191161v1	0	0	9	0	0	1	0.9	0.9	#DIV/0!	#DIV/0!	10	10
381	chrUn_NW_020191411v1	0	0	9	0	0	1	0.9	0.9	#DIV/0!	#DIV/0!	10	10
460	chrUn_NW_020191707v1	0	0	9	0	0	1	0.9	0.9	#DIV/0!	#DIV/0!	10	10
581	chrUn_NW_020192136v1	0	0	5	0	0	5	0.5	0.5	#DIV/0!	#DIV/0!	10	10
248	chrUn_NW_020190914v1	0	1	6	0	0	3	0.7	0.666667	#DIV/0!	1	10	9
473	chrUn_NW_020191768v1	1	0	6	0	0	3	0.7	0.666667	1	#DIV/0!	10	9
558	chrUn_NW_020192077v1	0	1	8	0	0	1	0.9	0.888889	#DIV/0!	1	10	9
97	chrUn_NW_020190415v1	0	0	3	0	0	6	0.333333	0.333333	#DIV/0!	#DIV/0!	9	9
103	chrUn_NW_020190432v1	0	0	8	0	0	1	0.888889	0.888889	#DIV/0!	#DIV/0!	9	9
104	chrUn_NW_020190434v1	0	0	7	0	0	2	0.777778	0.777778	#DIV/0!	#DIV/0!	9	9
141	chrUn_NW_020190538v1	0	0	7	0	0	2	0.777778	0.777778	#DIV/0!	#DIV/0!	9	9
549	chrUn_NW_020192050v1	0	0	8	0	0	1	0.888889	0.888889	#DIV/0!	#DIV/0!	9	9
92	chrUn_NW_020190394v1	0	0	6	1	0	2	0.666667	0.75	0	#DIV/0!	9	8
123	chrUn_NW_020190486v1	0	0	8	0	1	0	0.888889	1	#DIV/0!	0	9	8
615	chrUn_NW_020192267v1	0	1	8	0	0	0	1	1	#DIV/0!	1	9	8
132	chrUn_NW_020190509v1	1	1	6	0	0	1	0.888889	0.857143	1	1	9	7
472	chrUn_NW_020191765v1	0	0	7	1	1	0	0.777778	1	0	0	9	7
72	chrUn_NW_020190323v1	0	0	8	0	0	0	1	1	#DIV/0!	#DIV/0!	8	8
136	chrUn_NW_020190525v1	0	0	6	0	0	2	0.75	0.75	#DIV/0!	#DIV/0!	8	8
295	chrUn_NW_020191079v1	0	0	8	0	0	0	1	1	#DIV/0!	#DIV/0!	8	8
339	chrUn_NW_020191247v1	0	0	8	0	0	0	1	1	#DIV/0!	#DIV/0!	8	8
344	chrUn_NW_020191255v1	0	0	7	0	0	1	0.875	0.875	#DIV/0!	#DIV/0!	8	8
358	chrUn_NW_020191325v1	0	0	6	0	0	2	0.75	0.75	#DIV/0!	#DIV/0!	8	8
373	chrUn_NW_020191373v1	0	0	7	0	0	1	0.875	0.875	#DIV/0!	#DIV/0!	8	8
450	chrUn_NW_020191662v1	0	0	6	0	0	2	0.75	0.75	#DIV/0!	#DIV/0!	8	8
508	chrUn_NW_020191873v1	0	0	6	0	0	2	0.75	0.75	#DIV/0!	#DIV/0!	8	8
591	chrUn_NW_020192176v1	0	0	8	0	0	0	1	1	#DIV/0!	#DIV/0!	8	8
596	chrUn_NW_020192194v1	0	0	8	0	0	0	1	1	#DIV/0!	#DIV/0!	8	8
605	chrUn_NW_020192230v1	0	0	4	0	0	4	0.5	0.5	#DIV/0!	#DIV/0!	8	8
222	chrUn_NW_020190827v1	0	0	7	0	1	0	0.875	1	#DIV/0!	0	8	7
118	chrUn_NW_020190470v1	0	0	5	0	3	0	0.625	1	#DIV/0!	0	8	5
73	chrUn_NW_020190324v1	0	0	7	0	0	0	1	1	#DIV/0!	#DIV/0!	7	7
91	chrUn_NW_020190389v1	0	0	6	0	0	1	0.857143	0.857143	#DIV/0!	#DIV/0!	7	7
139	chrUn_NW_020190533v1	0	0	3	0	0	4	0.428571	0.428571	#DIV/0!	#DIV/0!	7	7
161	chrUn_NW_020190605v1	0	0	7	0	0	0	1	1	#DIV/0!	#DIV/0!	7	7
189	chrUn_NW_020190718v1	0	0	5	0	0	2	0.714286	0.714286	#DIV/0!	#DIV/0!	7	7
261	chrUn_NW_020190953v1	0	0	7	0	0	0	1	1	#DIV/0!	#DIV/0!	7	7
283	chrUn_NW_020191034v1	0	0	4	0	0	3	0.571429	0.571429	#DIV/0!	#DIV/0!	7	7
290	chrUn_NW_020191054v1	0	0	6	0	0	1	0.857143	0.857143	#DIV/0!	#DIV/0!	7	7
355	chrUn_NW_020191315v1	0	0	7	0	0	0	1	1	#DIV/0!	#DIV/0!	7	7
364	chrUn_NW_020191341v1	0	0	7	0	0	0	1	1	#DIV/0!	#DIV/0!	7	7
376	chrUn_NW_020191382v1	0	0	6	0	0	1	0.857143	0.857143	#DIV/0!	#DIV/0!	7	7
469	chrUn_NW_020191746v1	0	0	7	0	0	0	1	1	#DIV/0!	#DIV/0!	7	7
533	chrUn_NW_020191999v1	0	0	5	0	0	2	0.714286	0.714286	#DIV/0!	#DIV/0!	7	7
578	chrUn_NW_020192129v1	0	0	7	0	0	0	1	1	#DIV/0!	#DIV/0!	7	7
597	chrUn_NW_020192199v1	0	0	7	0	0	0	1	1	#DIV/0!	#DIV/0!	7	7
61	chrUn_NW_020190240v1	0	0	3	0	1	3	0.428571	0.5	#DIV/0!	0	7	6
110	chrUn_NW_020190451v1	0	0	6	0	1	0	0.857143	1	#DIV/0!	0	7	6
305	chrUn_NW_020191110v1	0	0	6	0	1	0	0.857143	1	#DIV/0!	0	7	6
319	chrUn_NW_020191185v1	0	0	6	0	1	0	0.857143	1	#DIV/0!	0	7	6
384	chrUn_NW_020191419v1	0	0	5	1	0	1	0.714286	0.833333	0	#DIV/0!	7	6
466	chrUn_NW_020191729v1	0	1	6	0	0	0	1	1	#DIV/0!	1	7	6
468	chrUn_NW_020191743v1	0	0	5	0	1	1	0.714286	0.833333	#DIV/0!	0	7	6
330	chrUn_NW_020191228v1	0	0	5	1	1	0	0.714286	1	0	0	7	5
30	chrUn_NW_020190117v1	0	0	6	0	0	0	1	1	#DIV/0!	#DIV/0!	6	6
42	chrUn_NW_020190166v1	0	0	5	0	0	1	0.833333	0.833333	#DIV/0!	#DIV/0!	6	6
94	chrUn_NW_020190399v1	0	0	3	0	0	3	0.5	0.5	#DIV/0!	#DIV/0!	6	6
99	chrUn_NW_020190418v1	0	0	4	0	0	2	0.666667	0.666667	#DIV/0!	#DIV/0!	6	6
133	chrUn_NW_020190512v1	0	0	5	0	0	1	0.833333	0.833333	#DIV/0!	#DIV/0!	6	6
159	chrUn_NW_020190599v1	0	0	6	0	0	0	1	1	#DIV/0!	#DIV/0!	6	6
178	chrUn_NW_020190685v1	0	0	3	0	0	3	0.5	0.5	#DIV/0!	#DIV/0!	6	6
211	chrUn_NW_020190792v1	0	0	6	0	0	0	1	1	#DIV/0!	#DIV/0!	6	6
237	chrUn_NW_020190878v1	0	0	6	0	0	0	1	1	#DIV/0!	#DIV/0!	6	6
266	chrUn_NW_020190985v1	0	0	6	0	0	0	1	1	#DIV/0!	#DIV/0!	6	6
273	chrUn_NW_020190999v1	0	0	5	0	0	1	0.833333	0.833333	#DIV/0!	#DIV/0!	6	6
365	chrUn_NW_020191343v1	0	0	3	0	0	3	0.5	0.5	#DIV/0!	#DIV/0!	6	6
451	chrUn_NW_020191664v1	0	0	6	0	0	0	1	1	#DIV/0!	#DIV/0!	6	6
497	chrUn_NW_020191852v1	0	0	4	0	0	2	0.666667	0.666667	#DIV/0!	#DIV/0!	6	6
517	chrUn_NW_020191909v1	0	0	6	0	0	0	1	1	#DIV/0!	#DIV/0!	6	6
584	chrUn_NW_020192145v1	0	0	6	0	0	0	1	1	#DIV/0!	#DIV/0!	6	6
606	chrUn_NW_020192234v1	0	0	6	0	0	0	1	1	#DIV/0!	#DIV/0!	6	6
79	chrUn_NW_020190345v1	0	0	5	0	1	0	0.833333	1	#DIV/0!	0	6	5
84	chrUn_NW_020190359v1	0	0	2	0	1	3	0.333333	0.4	#DIV/0!	0	6	5
144	chrUn_NW_020190543v1	0	1	3	0	0	2	0.666667	0.6	#DIV/0!	1	6	5
251	chrUn_NW_020190926v1	0	0	4	0	1	1	0.666667	0.8	#DIV/0!	0	6	5
470	chrUn_NW_020191756v1	0	1	2	0	0	3	0.5	0.4	#DIV/0!	1	6	5
512	chrUn_NW_020191895v1	0	0	4	0	1	1	0.666667	0.8	#DIV/0!	0	6	5
552	chrUn_NW_020192056v1	0	0	2	0	1	3	0.333333	0.4	#DIV/0!	0	6	5
146	chrUn_NW_020190552v1	1	0	0	1	0	4	0.166667	0	0.5	#DIV/0!	6	4
407	chrUn_NW_020191492v1	0	0	4	1	1	0	0.666667	1	0	0	6	4
620	chrUn_NW_020192287v1	0	0	4	0	2	0	0.666667	1	#DIV/0!	0	6	4
120	chrUn_NW_020190478v1	0	0	2	0	3	1	0.333333	0.666667	#DIV/0!	0	6	3
39	chrUn_NW_020190150v1	0	0	3	0	0	2	0.6	0.6	#DIV/0!	#DIV/0!	5	5
46	chrUn_NW_020190183v1	0	0	4	0	0	1	0.8	0.8	#DIV/0!	#DIV/0!	5	5
48	chrUn_NW_020190195v1	0	0	3	0	0	2	0.6	0.6	#DIV/0!	#DIV/0!	5	5
64	chrUn_NW_020190267v1	0	0	5	0	0	0	1	1	#DIV/0!	#DIV/0!	5	5
96	chrUn_NW_020190412v1	0	0	4	0	0	1	0.8	0.8	#DIV/0!	#DIV/0!	5	5
116	chrUn_NW_020190465v1	0	0	4	0	0	1	0.8	0.8	#DIV/0!	#DIV/0!	5	5
122	chrUn_NW_020190482v1	0	0	5	0	0	0	1	1	#DIV/0!	#DIV/0!	5	5
163	chrUn_NW_020190609v1	0	0	5	0	0	0	1	1	#DIV/0!	#DIV/0!	5	5
187	chrUn_NW_020190716v1	0	0	4	0	0	1	0.8	0.8	#DIV/0!	#DIV/0!	5	5
233	chrUn_NW_020190868v1	0	0	4	0	0	1	0.8	0.8	#DIV/0!	#DIV/0!	5	5
238	chrUn_NW_020190882v1	0	0	3	0	0	2	0.6	0.6	#DIV/0!	#DIV/0!	5	5
246	chrUn_NW_020190911v1	0	0	4	0	0	1	0.8	0.8	#DIV/0!	#DIV/0!	5	5
292	chrUn_NW_020191063v1	0	0	4	0	0	1	0.8	0.8	#DIV/0!	#DIV/0!	5	5
360	chrUn_NW_020191329v1	0	0	5	0	0	0	1	1	#DIV/0!	#DIV/0!	5	5
496	chrUn_NW_020191847v1	0	0	5	0	0	0	1	1	#DIV/0!	#DIV/0!	5	5
498	chrUn_NW_020191853v1	0	0	3	0	0	2	0.6	0.6	#DIV/0!	#DIV/0!	5	5
520	chrUn_NW_020191934v1	0	0	5	0	0	0	1	1	#DIV/0!	#DIV/0!	5	5
531	chrUn_NW_020191979v1	0	0	3	0	0	2	0.6	0.6	#DIV/0!	#DIV/0!	5	5
595	chrUn_NW_020192192v1	0	0	5	0	0	0	1	1	#DIV/0!	#DIV/0!	5	5
608	chrUn_NW_020192236v1	0	0	3	0	0	2	0.6	0.6	#DIV/0!	#DIV/0!	5	5
278	chrUn_NW_020191006v1	0	0	4	0	1	0	0.8	1	#DIV/0!	0	5	4
303	chrUn_NW_020191100v1	0	1	3	0	0	1	0.8	0.75	#DIV/0!	1	5	4
518	chrUn_NW_020191912v1	0	0	2	0	1	2	0.4	0.5	#DIV/0!	0	5	4
579	chrUn_NW_020192134v1	0	2	3	0	0	0	1	1	#DIV/0!	1	5	3
397	chrUn_NW_020191454v1	1	2	0	0	0	2	0.6	0	1	1	5	2
41	chrUn_NW_020190159v1	0	0	4	0	0	0	1	1	#DIV/0!	#DIV/0!	4	4
70	chrUn_NW_020190294v1	0	0	4	0	0	0	1	1	#DIV/0!	#DIV/0!	4	4
74	chrUn_NW_020190339v1	0	0	1	0	0	3	0.25	0.25	#DIV/0!	#DIV/0!	4	4
108	chrUn_NW_020190447v1	0	0	4	0	0	0	1	1	#DIV/0!	#DIV/0!	4	4
152	chrUn_NW_020190572v1	0	0	4	0	0	0	1	1	#DIV/0!	#DIV/0!	4	4
198	chrUn_NW_020190743v1	0	0	2	0	0	2	0.5	0.5	#DIV/0!	#DIV/0!	4	4
216	chrUn_NW_020190811v1	0	0	3	0	0	1	0.75	0.75	#DIV/0!	#DIV/0!	4	4
227	chrUn_NW_020190847v1	0	0	1	0	0	3	0.25	0.25	#DIV/0!	#DIV/0!	4	4
236	chrUn_NW_020190877v1	0	0	1	0	0	3	0.25	0.25	#DIV/0!	#DIV/0!	4	4
244	chrUn_NW_020190904v1	0	0	4	0	0	0	1	1	#DIV/0!	#DIV/0!	4	4
254	chrUn_NW_020190938v1	0	0	1	0	0	3	0.25	0.25	#DIV/0!	#DIV/0!	4	4
288	chrUn_NW_020191051v1	0	0	4	0	0	0	1	1	#DIV/0!	#DIV/0!	4	4
327	chrUn_NW_020191221v1	0	0	3	0	0	1	0.75	0.75	#DIV/0!	#DIV/0!	4	4
356	chrUn_NW_020191320v1	0	0	3	0	0	1	0.75	0.75	#DIV/0!	#DIV/0!	4	4
378	chrUn_NW_020191396v1	0	0	4	0	0	0	1	1	#DIV/0!	#DIV/0!	4	4
396	chrUn_NW_020191450v1	0	0	1	0	0	3	0.25	0.25	#DIV/0!	#DIV/0!	4	4
417	chrUn_NW_020191531v1	0	0	4	0	0	0	1	1	#DIV/0!	#DIV/0!	4	4
425	chrUn_NW_020191584v1	0	0	4	0	0	0	1	1	#DIV/0!	#DIV/0!	4	4
432	chrUn_NW_020191612v1	0	0	4	0	0	0	1	1	#DIV/0!	#DIV/0!	4	4
435	chrUn_NW_020191618v1	0	0	1	0	0	3	0.25	0.25	#DIV/0!	#DIV/0!	4	4
436	chrUn_NW_020191620v1	0	0	3	0	0	1	0.75	0.75	#DIV/0!	#DIV/0!	4	4
438	chrUn_NW_020191623v1	0	0	4	0	0	0	1	1	#DIV/0!	#DIV/0!	4	4
454	chrUn_NW_020191674v1	0	0	4	0	0	0	1	1	#DIV/0!	#DIV/0!	4	4
461	chrUn_NW_020191709v1	0	0	1	0	0	3	0.25	0.25	#DIV/0!	#DIV/0!	4	4
492	chrUn_NW_020191830v1	0	0	4	0	0	0	1	1	#DIV/0!	#DIV/0!	4	4
499	chrUn_NW_020191854v1	0	0	1	0	0	3	0.25	0.25	#DIV/0!	#DIV/0!	4	4
521	chrUn_NW_020191935v1	0	0	4	0	0	0	1	1	#DIV/0!	#DIV/0!	4	4
583	chrUn_NW_020192144v1	0	0	4	0	0	0	1	1	#DIV/0!	#DIV/0!	4	4
593	chrUn_NW_020192186v1	0	0	4	0	0	0	1	1	#DIV/0!	#DIV/0!	4	4
613	chrUn_NW_020192262v1	0	0	2	0	0	2	0.5	0.5	#DIV/0!	#DIV/0!	4	4
614	chrUn_NW_020192265v1	0	0	2	0	0	2	0.5	0.5	#DIV/0!	#DIV/0!	4	4
383	chrUn_NW_020191416v1	0	0	3	0	1	0	0.75	1	#DIV/0!	0	4	3
391	chrUn_NW_020191439v1	0	1	2	0	0	1	0.75	0.666667	#DIV/0!	1	4	3
420	chrUn_NW_020191541v1	0	0	3	0	1	0	0.75	1	#DIV/0!	0	4	3
433	chrUn_NW_020191614v1	0	0	1	0	1	2	0.25	0.333333	#DIV/0!	0	4	3
553	chrUn_NW_020192057v1	0	0	3	0	1	0	0.75	1	#DIV/0!	0	4	3
617	chrUn_NW_020192282v1	1	0	2	0	0	1	0.75	0.666667	1	#DIV/0!	4	3
51	chrUn_NW_020190198v1	0	0	2	0	0	1	0.666667	0.666667	#DIV/0!	#DIV/0!	3	3
81	chrUn_NW_020190347v1	0	0	3	0	0	0	1	1	#DIV/0!	#DIV/0!	3	3
90	chrUn_NW_020190386v1	0	0	0	0	0	3	0	0	#DIV/0!	#DIV/0!	3	3
93	chrUn_NW_020190397v1	0	0	0	0	0	3	0	0	#DIV/0!	#DIV/0!	3	3
105	chrUn_NW_020190435v1	0	0	3	0	0	0	1	1	#DIV/0!	#DIV/0!	3	3
119	chrUn_NW_020190477v1	0	0	2	0	0	1	0.666667	0.666667	#DIV/0!	#DIV/0!	3	3
124	chrUn_NW_020190488v1	0	0	1	0	0	2	0.333333	0.333333	#DIV/0!	#DIV/0!	3	3
129	chrUn_NW_020190503v1	0	0	1	0	0	2	0.333333	0.333333	#DIV/0!	#DIV/0!	3	3
130	chrUn_NW_020190505v1	0	0	2	0	0	1	0.666667	0.666667	#DIV/0!	#DIV/0!	3	3
145	chrUn_NW_020190544v1	0	0	3	0	0	0	1	1	#DIV/0!	#DIV/0!	3	3
147	chrUn_NW_020190553v1	0	0	3	0	0	0	1	1	#DIV/0!	#DIV/0!	3	3
149	chrUn_NW_020190558v1	0	0	3	0	0	0	1	1	#DIV/0!	#DIV/0!	3	3
153	chrUn_NW_020190573v1	0	0	2	0	0	1	0.666667	0.666667	#DIV/0!	#DIV/0!	3	3
160	chrUn_NW_020190604v1	0	0	3	0	0	0	1	1	#DIV/0!	#DIV/0!	3	3
172	chrUn_NW_020190671v1	0	0	2	0	0	1	0.666667	0.666667	#DIV/0!	#DIV/0!	3	3
175	chrUn_NW_020190677v1	0	0	3	0	0	0	1	1	#DIV/0!	#DIV/0!	3	3
199	chrUn_NW_020190746v1	0	0	3	0	0	0	1	1	#DIV/0!	#DIV/0!	3	3
226	chrUn_NW_020190840v1	0	0	2	0	0	1	0.666667	0.666667	#DIV/0!	#DIV/0!	3	3
253	chrUn_NW_020190931v1	0	0	3	0	0	0	1	1	#DIV/0!	#DIV/0!	3	3
262	chrUn_NW_020190954v1	0	0	2	0	0	1	0.666667	0.666667	#DIV/0!	#DIV/0!	3	3
264	chrUn_NW_020190962v1	0	0	3	0	0	0	1	1	#DIV/0!	#DIV/0!	3	3
293	chrUn_NW_020191067v1	0	0	2	0	0	1	0.666667	0.666667	#DIV/0!	#DIV/0!	3	3
300	chrUn_NW_020191093v1	0	0	0	0	0	3	0	0	#DIV/0!	#DIV/0!	3	3
312	chrUn_NW_020191145v1	0	0	1	0	0	2	0.333333	0.333333	#DIV/0!	#DIV/0!	3	3
321	chrUn_NW_020191194v1	0	0	1	0	0	2	0.333333	0.333333	#DIV/0!	#DIV/0!	3	3
323	chrUn_NW_020191200v1	0	0	3	0	0	0	1	1	#DIV/0!	#DIV/0!	3	3
340	chrUn_NW_020191248v1	0	0	3	0	0	0	1	1	#DIV/0!	#DIV/0!	3	3
351	chrUn_NW_020191291v1	0	0	3	0	0	0	1	1	#DIV/0!	#DIV/0!	3	3
359	chrUn_NW_020191326v1	0	0	3	0	0	0	1	1	#DIV/0!	#DIV/0!	3	3
371	chrUn_NW_020191364v1	0	0	3	0	0	0	1	1	#DIV/0!	#DIV/0!	3	3
372	chrUn_NW_020191370v1	0	0	3	0	0	0	1	1	#DIV/0!	#DIV/0!	3	3
380	chrUn_NW_020191408v1	0	0	3	0	0	0	1	1	#DIV/0!	#DIV/0!	3	3
382	chrUn_NW_020191415v1	0	0	3	0	0	0	1	1	#DIV/0!	#DIV/0!	3	3
392	chrUn_NW_020191440v1	0	0	3	0	0	0	1	1	#DIV/0!	#DIV/0!	3	3
415	chrUn_NW_020191519v1	0	0	2	0	0	1	0.666667	0.666667	#DIV/0!	#DIV/0!	3	3
422	chrUn_NW_020191545v1	0	0	1	0	0	2	0.333333	0.333333	#DIV/0!	#DIV/0!	3	3
428	chrUn_NW_020191597v1	0	0	3	0	0	0	1	1	#DIV/0!	#DIV/0!	3	3
437	chrUn_NW_020191622v1	0	0	2	0	0	1	0.666667	0.666667	#DIV/0!	#DIV/0!	3	3
443	chrUn_NW_020191641v1	0	0	3	0	0	0	1	1	#DIV/0!	#DIV/0!	3	3
471	chrUn_NW_020191759v1	0	0	2	0	0	1	0.666667	0.666667	#DIV/0!	#DIV/0!	3	3
474	chrUn_NW_020191770v1	0	0	3	0	0	0	1	1	#DIV/0!	#DIV/0!	3	3
475	chrUn_NW_020191772v1	0	0	3	0	0	0	1	1	#DIV/0!	#DIV/0!	3	3
480	chrUn_NW_020191787v1	0	0	3	0	0	0	1	1	#DIV/0!	#DIV/0!	3	3
487	chrUn_NW_020191815v1	0	0	2	0	0	1	0.666667	0.666667	#DIV/0!	#DIV/0!	3	3
527	chrUn_NW_020191968v1	0	0	0	0	0	3	0	0	#DIV/0!	#DIV/0!	3	3
529	chrUn_NW_020191977v1	0	0	1	0	0	2	0.333333	0.333333	#DIV/0!	#DIV/0!	3	3
556	chrUn_NW_020192070v1	0	0	1	0	0	2	0.333333	0.333333	#DIV/0!	#DIV/0!	3	3
557	chrUn_NW_020192075v1	0	0	3	0	0	0	1	1	#DIV/0!	#DIV/0!	3	3
571	chrUn_NW_020192111v1	0	0	3	0	0	0	1	1	#DIV/0!	#DIV/0!	3	3
62	chrUn_NW_020190245v1	0	0	1	0	1	1	0.333333	0.5	#DIV/0!	0	3	2
75	chrUn_NW_020190341v1	0	0	1	0	1	1	0.333333	0.5	#DIV/0!	0	3	2
77	chrUn_NW_020190343v1	1	0	2	0	0	0	1	1	1	#DIV/0!	3	2
85	chrUn_NW_020190363v1	1	0	1	0	0	1	0.666667	0.5	1	#DIV/0!	3	2
158	chrUn_NW_020190598v1	0	1	2	0	0	0	1	1	#DIV/0!	1	3	2
212	chrUn_NW_020190796v1	0	0	2	0	1	0	0.666667	1	#DIV/0!	0	3	2
414	chrUn_NW_020191515v1	1	0	0	0	0	2	0.333333	0	1	#DIV/0!	3	2
478	chrUn_NW_020191782v1	0	0	2	1	0	0	0.666667	1	0	#DIV/0!	3	2
31	chrUn_NW_020190118v1	0	0	2	0	0	0	1	1	#DIV/0!	#DIV/0!	2	2
36	chrUn_NW_020190137v1	0	0	2	0	0	0	1	1	#DIV/0!	#DIV/0!	2	2
47	chrUn_NW_020190187v1	0	0	1	0	0	1	0.5	0.5	#DIV/0!	#DIV/0!	2	2
49	chrUn_NW_020190196v1	0	0	0	0	0	2	0	0	#DIV/0!	#DIV/0!	2	2
52	chrUn_NW_020190206v1	0	0	2	0	0	0	1	1	#DIV/0!	#DIV/0!	2	2
54	chrUn_NW_020190213v1	0	0	2	0	0	0	1	1	#DIV/0!	#DIV/0!	2	2
55	chrUn_NW_020190214v1	0	0	1	0	0	1	0.5	0.5	#DIV/0!	#DIV/0!	2	2
57	chrUn_NW_020190221v1	0	0	1	0	0	1	0.5	0.5	#DIV/0!	#DIV/0!	2	2
58	chrUn_NW_020190225v1	0	0	1	0	0	1	0.5	0.5	#DIV/0!	#DIV/0!	2	2
68	chrUn_NW_020190283v1	0	0	2	0	0	0	1	1	#DIV/0!	#DIV/0!	2	2
69	chrUn_NW_020190286v1	0	0	2	0	0	0	1	1	#DIV/0!	#DIV/0!	2	2
71	chrUn_NW_020190296v1	0	0	1	0	0	1	0.5	0.5	#DIV/0!	#DIV/0!	2	2
82	chrUn_NW_020190352v1	0	0	2	0	0	0	1	1	#DIV/0!	#DIV/0!	2	2
86	chrUn_NW_020190370v1	0	0	2	0	0	0	1	1	#DIV/0!	#DIV/0!	2	2
87	chrUn_NW_020190375v1	0	0	2	0	0	0	1	1	#DIV/0!	#DIV/0!	2	2
89	chrUn_NW_020190385v1	0	0	1	0	0	1	0.5	0.5	#DIV/0!	#DIV/0!	2	2
98	chrUn_NW_020190417v1	0	0	2	0	0	0	1	1	#DIV/0!	#DIV/0!	2	2
101	chrUn_NW_020190422v1	0	0	1	0	0	1	0.5	0.5	#DIV/0!	#DIV/0!	2	2
115	chrUn_NW_020190463v1	0	0	2	0	0	0	1	1	#DIV/0!	#DIV/0!	2	2
121	chrUn_NW_020190479v1	0	0	2	0	0	0	1	1	#DIV/0!	#DIV/0!	2	2
125	chrUn_NW_020190494v1	0	0	2	0	0	0	1	1	#DIV/0!	#DIV/0!	2	2
128	chrUn_NW_020190500v1	0	0	2	0	0	0	1	1	#DIV/0!	#DIV/0!	2	2
140	chrUn_NW_020190535v1	0	0	2	0	0	0	1	1	#DIV/0!	#DIV/0!	2	2
142	chrUn_NW_020190539v1	0	0	1	0	0	1	0.5	0.5	#DIV/0!	#DIV/0!	2	2
154	chrUn_NW_020190582v1	0	0	2	0	0	0	1	1	#DIV/0!	#DIV/0!	2	2
165	chrUn_NW_020190616v1	0	0	1	0	0	1	0.5	0.5	#DIV/0!	#DIV/0!	2	2
170	chrUn_NW_020190663v1	0	0	2	0	0	0	1	1	#DIV/0!	#DIV/0!	2	2
173	chrUn_NW_020190673v1	0	0	2	0	0	0	1	1	#DIV/0!	#DIV/0!	2	2
177	chrUn_NW_020190683v1	0	0	2	0	0	0	1	1	#DIV/0!	#DIV/0!	2	2
179	chrUn_NW_020190686v1	0	0	1	0	0	1	0.5	0.5	#DIV/0!	#DIV/0!	2	2
180	chrUn_NW_020190690v1	0	0	1	0	0	1	0.5	0.5	#DIV/0!	#DIV/0!	2	2
182	chrUn_NW_020190695v1	0	0	1	0	0	1	0.5	0.5	#DIV/0!	#DIV/0!	2	2
185	chrUn_NW_020190711v1	0	0	2	0	0	0	1	1	#DIV/0!	#DIV/0!	2	2
201	chrUn_NW_020190756v1	0	0	1	0	0	1	0.5	0.5	#DIV/0!	#DIV/0!	2	2
204	chrUn_NW_020190768v1	0	0	2	0	0	0	1	1	#DIV/0!	#DIV/0!	2	2
214	chrUn_NW_020190802v1	0	0	1	0	0	1	0.5	0.5	#DIV/0!	#DIV/0!	2	2
219	chrUn_NW_020190815v1	0	0	2	0	0	0	1	1	#DIV/0!	#DIV/0!	2	2
220	chrUn_NW_020190818v1	0	0	2	0	0	0	1	1	#DIV/0!	#DIV/0!	2	2
224	chrUn_NW_020190836v1	0	0	2	0	0	0	1	1	#DIV/0!	#DIV/0!	2	2
230	chrUn_NW_020190857v1	0	0	2	0	0	0	1	1	#DIV/0!	#DIV/0!	2	2
232	chrUn_NW_020190861v1	0	0	2	0	0	0	1	1	#DIV/0!	#DIV/0!	2	2
234	chrUn_NW_020190873v1	0	0	2	0	0	0	1	1	#DIV/0!	#DIV/0!	2	2
245	chrUn_NW_020190909v1	0	0	2	0	0	0	1	1	#DIV/0!	#DIV/0!	2	2
249	chrUn_NW_020190915v1	0	0	2	0	0	0	1	1	#DIV/0!	#DIV/0!	2	2
252	chrUn_NW_020190927v1	0	0	1	0	0	1	0.5	0.5	#DIV/0!	#DIV/0!	2	2
263	chrUn_NW_020190961v1	0	0	1	0	0	1	0.5	0.5	#DIV/0!	#DIV/0!	2	2
265	chrUn_NW_020190974v1	0	0	2	0	0	0	1	1	#DIV/0!	#DIV/0!	2	2
281	chrUn_NW_020191023v1	0	0	2	0	0	0	1	1	#DIV/0!	#DIV/0!	2	2
284	chrUn_NW_020191036v1	0	0	2	0	0	0	1	1	#DIV/0!	#DIV/0!	2	2
286	chrUn_NW_020191046v1	0	0	2	0	0	0	1	1	#DIV/0!	#DIV/0!	2	2
289	chrUn_NW_020191053v1	0	0	0	0	0	2	0	0	#DIV/0!	#DIV/0!	2	2
294	chrUn_NW_020191072v1	0	0	1	0	0	1	0.5	0.5	#DIV/0!	#DIV/0!	2	2
298	chrUn_NW_020191087v1	0	0	2	0	0	0	1	1	#DIV/0!	#DIV/0!	2	2
301	chrUn_NW_020191097v1	0	0	2	0	0	0	1	1	#DIV/0!	#DIV/0!	2	2
304	chrUn_NW_020191105v1	0	0	2	0	0	0	1	1	#DIV/0!	#DIV/0!	2	2
308	chrUn_NW_020191114v1	0	0	2	0	0	0	1	1	#DIV/0!	#DIV/0!	2	2
318	chrUn_NW_020191168v1	0	0	0	0	0	2	0	0	#DIV/0!	#DIV/0!	2	2
324	chrUn_NW_020191204v1	0	0	2	0	0	0	1	1	#DIV/0!	#DIV/0!	2	2
326	chrUn_NW_020191210v1	0	0	2	0	0	0	1	1	#DIV/0!	#DIV/0!	2	2
329	chrUn_NW_020191225v1	0	0	2	0	0	0	1	1	#DIV/0!	#DIV/0!	2	2
336	chrUn_NW_020191239v1	0	0	2	0	0	0	1	1	#DIV/0!	#DIV/0!	2	2
337	chrUn_NW_020191240v1	0	0	0	0	0	2	0	0	#DIV/0!	#DIV/0!	2	2
338	chrUn_NW_020191243v1	0	0	2	0	0	0	1	1	#DIV/0!	#DIV/0!	2	2
343	chrUn_NW_020191252v1	0	0	0	0	0	2	0	0	#DIV/0!	#DIV/0!	2	2
348	chrUn_NW_020191264v1	0	0	2	0	0	0	1	1	#DIV/0!	#DIV/0!	2	2
349	chrUn_NW_020191265v1	0	0	2	0	0	0	1	1	#DIV/0!	#DIV/0!	2	2
353	chrUn_NW_020191303v1	0	0	2	0	0	0	1	1	#DIV/0!	#DIV/0!	2	2
354	chrUn_NW_020191311v1	0	0	2	0	0	0	1	1	#DIV/0!	#DIV/0!	2	2
366	chrUn_NW_020191345v1	0	0	1	0	0	1	0.5	0.5	#DIV/0!	#DIV/0!	2	2
369	chrUn_NW_020191358v1	0	0	1	0	0	1	0.5	0.5	#DIV/0!	#DIV/0!	2	2
385	chrUn_NW_020191420v1	0	0	1	0	0	1	0.5	0.5	#DIV/0!	#DIV/0!	2	2
386	chrUn_NW_020191423v1	0	0	2	0	0	0	1	1	#DIV/0!	#DIV/0!	2	2
395	chrUn_NW_020191449v1	0	0	2	0	0	0	1	1	#DIV/0!	#DIV/0!	2	2
406	chrUn_NW_020191485v1	0	0	0	0	0	2	0	0	#DIV/0!	#DIV/0!	2	2
416	chrUn_NW_020191524v1	0	0	0	0	0	2	0	0	#DIV/0!	#DIV/0!	2	2
434	chrUn_NW_020191617v1	0	0	0	0	0	2	0	0	#DIV/0!	#DIV/0!	2	2
439	chrUn_NW_020191628v1	0	0	1	0	0	1	0.5	0.5	#DIV/0!	#DIV/0!	2	2
441	chrUn_NW_020191631v1	0	0	2	0	0	0	1	1	#DIV/0!	#DIV/0!	2	2
445	chrUn_NW_020191644v1	0	0	1	0	0	1	0.5	0.5	#DIV/0!	#DIV/0!	2	2
446	chrUn_NW_020191649v1	0	0	2	0	0	0	1	1	#DIV/0!	#DIV/0!	2	2
452	chrUn_NW_020191666v1	0	0	0	0	0	2	0	0	#DIV/0!	#DIV/0!	2	2
455	chrUn_NW_020191686v1	0	0	1	0	0	1	0.5	0.5	#DIV/0!	#DIV/0!	2	2
465	chrUn_NW_020191725v1	0	0	2	0	0	0	1	1	#DIV/0!	#DIV/0!	2	2
467	chrUn_NW_020191731v1	0	0	1	0	0	1	0.5	0.5	#DIV/0!	#DIV/0!	2	2
484	chrUn_NW_020191797v1	0	0	2	0	0	0	1	1	#DIV/0!	#DIV/0!	2	2
490	chrUn_NW_020191826v1	0	0	1	0	0	1	0.5	0.5	#DIV/0!	#DIV/0!	2	2
491	chrUn_NW_020191827v1	0	0	0	0	0	2	0	0	#DIV/0!	#DIV/0!	2	2
500	chrUn_NW_020191856v1	0	0	2	0	0	0	1	1	#DIV/0!	#DIV/0!	2	2
514	chrUn_NW_020191901v1	0	0	2	0	0	0	1	1	#DIV/0!	#DIV/0!	2	2
523	chrUn_NW_020191950v1	0	0	2	0	0	0	1	1	#DIV/0!	#DIV/0!	2	2
534	chrUn_NW_020192001v1	0	0	2	0	0	0	1	1	#DIV/0!	#DIV/0!	2	2
535	chrUn_NW_020192004v1	0	0	1	0	0	1	0.5	0.5	#DIV/0!	#DIV/0!	2	2
537	chrUn_NW_020192010v1	0	0	2	0	0	0	1	1	#DIV/0!	#DIV/0!	2	2
538	chrUn_NW_020192011v1	0	0	1	0	0	1	0.5	0.5	#DIV/0!	#DIV/0!	2	2
541	chrUn_NW_020192016v1	0	0	2	0	0	0	1	1	#DIV/0!	#DIV/0!	2	2
542	chrUn_NW_020192018v1	0	0	2	0	0	0	1	1	#DIV/0!	#DIV/0!	2	2
545	chrUn_NW_020192027v1	0	0	2	0	0	0	1	1	#DIV/0!	#DIV/0!	2	2
560	chrUn_NW_020192079v1	0	0	1	0	0	1	0.5	0.5	#DIV/0!	#DIV/0!	2	2
562	chrUn_NW_020192082v1	0	0	1	0	0	1	0.5	0.5	#DIV/0!	#DIV/0!	2	2
563	chrUn_NW_020192085v1	0	0	2	0	0	0	1	1	#DIV/0!	#DIV/0!	2	2
564	chrUn_NW_020192087v1	0	0	1	0	0	1	0.5	0.5	#DIV/0!	#DIV/0!	2	2
565	chrUn_NW_020192088v1	0	0	2	0	0	0	1	1	#DIV/0!	#DIV/0!	2	2
567	chrUn_NW_020192096v1	0	0	1	0	0	1	0.5	0.5	#DIV/0!	#DIV/0!	2	2
568	chrUn_NW_020192098v1	0	0	2	0	0	0	1	1	#DIV/0!	#DIV/0!	2	2
575	chrUn_NW_020192124v1	0	0	2	0	0	0	1	1	#DIV/0!	#DIV/0!	2	2
577	chrUn_NW_020192127v1	0	0	2	0	0	0	1	1	#DIV/0!	#DIV/0!	2	2
590	chrUn_NW_020192175v1	0	0	1	0	0	1	0.5	0.5	#DIV/0!	#DIV/0!	2	2
598	chrUn_NW_020192201v1	0	0	0	0	0	2	0	0	#DIV/0!	#DIV/0!	2	2
600	chrUn_NW_020192209v1	0	0	1	0	0	1	0.5	0.5	#DIV/0!	#DIV/0!	2	2
604	chrUn_NW_020192228v1	0	0	2	0	0	0	1	1	#DIV/0!	#DIV/0!	2	2
609	chrUn_NW_020192242v1	0	0	2	0	0	0	1	1	#DIV/0!	#DIV/0!	2	2
610	chrUn_NW_020192247v1	0	0	2	0	0	0	1	1	#DIV/0!	#DIV/0!	2	2
618	chrUn_NW_020192284v1	0	0	2	0	0	0	1	1	#DIV/0!	#DIV/0!	2	2
619	chrUn_NW_020192286v1	0	0	2	0	0	0	1	1	#DIV/0!	#DIV/0!	2	2
162	chrUn_NW_020190606v1	0	1	0	0	0	1	0.5	0	#DIV/0!	1	2	1
168	chrUn_NW_020190649v1	1	0	1	0	0	0	1	1	1	#DIV/0!	2	1
192	chrUn_NW_020190731v1	0	0	1	0	1	0	0.5	1	#DIV/0!	0	2	1
218	chrUn_NW_020190813v1	0	0	1	1	0	0	0.5	1	0	#DIV/0!	2	1
476	chrUn_NW_020191774v1	0	0	1	0	1	0	0.5	1	#DIV/0!	0	2	1
544	chrUn_NW_020192023v1	0	0	0	0	1	1	0	0	#DIV/0!	0	2	1
607	chrUn_NW_020192235v1	0	0	1	0	1	0	0.5	1	#DIV/0!	0	2	1
32	chrUn_NW_020190123v1	0	0	1	0	0	0	1	1	#DIV/0!	#DIV/0!	1	1
33	chrUn_NW_020190124v1	0	0	1	0	0	0	1	1	#DIV/0!	#DIV/0!	1	1
34	chrUn_NW_020190133v1	0	0	0	0	0	1	0	0	#DIV/0!	#DIV/0!	1	1
35	chrUn_NW_020190136v1	0	0	1	0	0	0	1	1	#DIV/0!	#DIV/0!	1	1
38	chrUn_NW_020190140v1	0	0	0	0	0	1	0	0	#DIV/0!	#DIV/0!	1	1
40	chrUn_NW_020190158v1	0	0	1	0	0	0	1	1	#DIV/0!	#DIV/0!	1	1
43	chrUn_NW_020190170v1	0	0	1	0	0	0	1	1	#DIV/0!	#DIV/0!	1	1
44	chrUn_NW_020190171v1	0	0	1	0	0	0	1	1	#DIV/0!	#DIV/0!	1	1
45	chrUn_NW_020190179v1	0	0	0	0	0	1	0	0	#DIV/0!	#DIV/0!	1	1
50	chrUn_NW_020190197v1	0	0	1	0	0	0	1	1	#DIV/0!	#DIV/0!	1	1
56	chrUn_NW_020190218v1	0	0	1	0	0	0	1	1	#DIV/0!	#DIV/0!	1	1
65	chrUn_NW_020190269v1	0	0	1	0	0	0	1	1	#DIV/0!	#DIV/0!	1	1
66	chrUn_NW_020190278v1	0	0	0	0	0	1	0	0	#DIV/0!	#DIV/0!	1	1
78	chrUn_NW_020190344v1	0	0	1	0	0	0	1	1	#DIV/0!	#DIV/0!	1	1
88	chrUn_NW_020190379v1	0	0	0	0	0	1	0	0	#DIV/0!	#DIV/0!	1	1
109	chrUn_NW_020190449v1	0	0	1	0	0	0	1	1	#DIV/0!	#DIV/0!	1	1
112	chrUn_NW_020190454v1	0	0	0	0	0	1	0	0	#DIV/0!	#DIV/0!	1	1
113	chrUn_NW_020190457v1	0	0	1	0	0	0	1	1	#DIV/0!	#DIV/0!	1	1
134	chrUn_NW_020190514v1	0	0	1	0	0	0	1	1	#DIV/0!	#DIV/0!	1	1
137	chrUn_NW_020190530v1	0	0	1	0	0	0	1	1	#DIV/0!	#DIV/0!	1	1
138	chrUn_NW_020190531v1	0	0	0	0	0	1	0	0	#DIV/0!	#DIV/0!	1	1
143	chrUn_NW_020190542v1	0	0	1	0	0	0	1	1	#DIV/0!	#DIV/0!	1	1
150	chrUn_NW_020190559v1	0	0	1	0	0	0	1	1	#DIV/0!	#DIV/0!	1	1
155	chrUn_NW_020190589v1	0	0	1	0	0	0	1	1	#DIV/0!	#DIV/0!	1	1
166	chrUn_NW_020190624v1	0	0	0	0	0	1	0	0	#DIV/0!	#DIV/0!	1	1
167	chrUn_NW_020190632v1	0	0	1	0	0	0	1	1	#DIV/0!	#DIV/0!	1	1
169	chrUn_NW_020190656v1	0	0	0	0	0	1	0	0	#DIV/0!	#DIV/0!	1	1
171	chrUn_NW_020190664v1	0	0	1	0	0	0	1	1	#DIV/0!	#DIV/0!	1	1
176	chrUn_NW_020190680v1	0	0	1	0	0	0	1	1	#DIV/0!	#DIV/0!	1	1
181	chrUn_NW_020190692v1	0	0	0	0	0	1	0	0	#DIV/0!	#DIV/0!	1	1
183	chrUn_NW_020190701v1	0	0	1	0	0	0	1	1	#DIV/0!	#DIV/0!	1	1
184	chrUn_NW_020190708v1	0	0	1	0	0	0	1	1	#DIV/0!	#DIV/0!	1	1
186	chrUn_NW_020190714v1	0	0	1	0	0	0	1	1	#DIV/0!	#DIV/0!	1	1
188	chrUn_NW_020190717v1	0	0	1	0	0	0	1	1	#DIV/0!	#DIV/0!	1	1
191	chrUn_NW_020190728v1	0	0	1	0	0	0	1	1	#DIV/0!	#DIV/0!	1	1
193	chrUn_NW_020190737v1	0	0	1	0	0	0	1	1	#DIV/0!	#DIV/0!	1	1
194	chrUn_NW_020190738v1	0	0	0	0	0	1	0	0	#DIV/0!	#DIV/0!	1	1
195	chrUn_NW_020190739v1	0	0	1	0	0	0	1	1	#DIV/0!	#DIV/0!	1	1
196	chrUn_NW_020190740v1	0	0	0	0	0	1	0	0	#DIV/0!	#DIV/0!	1	1
202	chrUn_NW_020190759v1	0	0	1	0	0	0	1	1	#DIV/0!	#DIV/0!	1	1
203	chrUn_NW_020190767v1	0	0	1	0	0	0	1	1	#DIV/0!	#DIV/0!	1	1
205	chrUn_NW_020190770v1	0	0	1	0	0	0	1	1	#DIV/0!	#DIV/0!	1	1
206	chrUn_NW_020190771v1	0	0	1	0	0	0	1	1	#DIV/0!	#DIV/0!	1	1
207	chrUn_NW_020190774v1	0	0	1	0	0	0	1	1	#DIV/0!	#DIV/0!	1	1
208	chrUn_NW_020190779v1	0	0	1	0	0	0	1	1	#DIV/0!	#DIV/0!	1	1
209	chrUn_NW_020190786v1	0	0	1	0	0	0	1	1	#DIV/0!	#DIV/0!	1	1
217	chrUn_NW_020190812v1	0	0	1	0	0	0	1	1	#DIV/0!	#DIV/0!	1	1
223	chrUn_NW_020190828v1	0	0	1	0	0	0	1	1	#DIV/0!	#DIV/0!	1	1
225	chrUn_NW_020190838v1	0	0	1	0	0	0	1	1	#DIV/0!	#DIV/0!	1	1
229	chrUn_NW_020190853v1	0	0	1	0	0	0	1	1	#DIV/0!	#DIV/0!	1	1
239	chrUn_NW_020190892v1	0	0	1	0	0	0	1	1	#DIV/0!	#DIV/0!	1	1
241	chrUn_NW_020190899v1	0	0	1	0	0	0	1	1	#DIV/0!	#DIV/0!	1	1
242	chrUn_NW_020190900v1	0	0	1	0	0	0	1	1	#DIV/0!	#DIV/0!	1	1
243	chrUn_NW_020190901v1	0	0	0	0	0	1	0	0	#DIV/0!	#DIV/0!	1	1
247	chrUn_NW_020190913v1	0	0	1	0	0	0	1	1	#DIV/0!	#DIV/0!	1	1
250	chrUn_NW_020190918v1	0	0	1	0	0	0	1	1	#DIV/0!	#DIV/0!	1	1
255	chrUn_NW_020190941v1	0	0	1	0	0	0	1	1	#DIV/0!	#DIV/0!	1	1
257	chrUn_NW_020190943v1	0	0	0	0	0	1	0	0	#DIV/0!	#DIV/0!	1	1
258	chrUn_NW_020190944v1	0	0	1	0	0	0	1	1	#DIV/0!	#DIV/0!	1	1
259	chrUn_NW_020190945v1	0	0	1	0	0	0	1	1	#DIV/0!	#DIV/0!	1	1
260	chrUn_NW_020190948v1	0	0	0	0	0	1	0	0	#DIV/0!	#DIV/0!	1	1
267	chrUn_NW_020190987v1	0	0	0	0	0	1	0	0	#DIV/0!	#DIV/0!	1	1
268	chrUn_NW_020190990v1	0	0	1	0	0	0	1	1	#DIV/0!	#DIV/0!	1	1
269	chrUn_NW_020190991v1	0	0	1	0	0	0	1	1	#DIV/0!	#DIV/0!	1	1
271	chrUn_NW_020190996v1	0	0	0	0	0	1	0	0	#DIV/0!	#DIV/0!	1	1
272	chrUn_NW_020190998v1	0	0	1	0	0	0	1	1	#DIV/0!	#DIV/0!	1	1
274	chrUn_NW_020191000v1	0	0	1	0	0	0	1	1	#DIV/0!	#DIV/0!	1	1
276	chrUn_NW_020191003v1	0	0	1	0	0	0	1	1	#DIV/0!	#DIV/0!	1	1
277	chrUn_NW_020191005v1	0	0	0	0	0	1	0	0	#DIV/0!	#DIV/0!	1	1
279	chrUn_NW_020191021v1	0	0	1	0	0	0	1	1	#DIV/0!	#DIV/0!	1	1
280	chrUn_NW_020191022v1	0	0	1	0	0	0	1	1	#DIV/0!	#DIV/0!	1	1
282	chrUn_NW_020191032v1	0	0	1	0	0	0	1	1	#DIV/0!	#DIV/0!	1	1
285	chrUn_NW_020191045v1	0	0	1	0	0	0	1	1	#DIV/0!	#DIV/0!	1	1
296	chrUn_NW_020191082v1	0	0	1	0	0	0	1	1	#DIV/0!	#DIV/0!	1	1
299	chrUn_NW_020191092v1	0	0	1	0	0	0	1	1	#DIV/0!	#DIV/0!	1	1
306	chrUn_NW_020191112v1	0	0	1	0	0	0	1	1	#DIV/0!	#DIV/0!	1	1
307	chrUn_NW_020191113v1	0	0	1	0	0	0	1	1	#DIV/0!	#DIV/0!	1	1
309	chrUn_NW_020191115v1	0	0	1	0	0	0	1	1	#DIV/0!	#DIV/0!	1	1
310	chrUn_NW_020191124v1	0	0	1	0	0	0	1	1	#DIV/0!	#DIV/0!	1	1
311	chrUn_NW_020191141v1	0	0	1	0	0	0	1	1	#DIV/0!	#DIV/0!	1	1
314	chrUn_NW_020191150v1	0	0	1	0	0	0	1	1	#DIV/0!	#DIV/0!	1	1
315	chrUn_NW_020191154v1	0	0	1	0	0	0	1	1	#DIV/0!	#DIV/0!	1	1
320	chrUn_NW_020191187v1	0	0	1	0	0	0	1	1	#DIV/0!	#DIV/0!	1	1
325	chrUn_NW_020191208v1	0	0	1	0	0	0	1	1	#DIV/0!	#DIV/0!	1	1
331	chrUn_NW_020191230v1	0	0	1	0	0	0	1	1	#DIV/0!	#DIV/0!	1	1
332	chrUn_NW_020191231v1	0	0	1	0	0	0	1	1	#DIV/0!	#DIV/0!	1	1
333	chrUn_NW_020191234v1	0	0	1	0	0	0	1	1	#DIV/0!	#DIV/0!	1	1
334	chrUn_NW_020191235v1	0	0	1	0	0	0	1	1	#DIV/0!	#DIV/0!	1	1
342	chrUn_NW_020191250v1	0	0	0	0	0	1	0	0	#DIV/0!	#DIV/0!	1	1
345	chrUn_NW_020191259v1	0	0	1	0	0	0	1	1	#DIV/0!	#DIV/0!	1	1
350	chrUn_NW_020191268v1	0	0	1	0	0	0	1	1	#DIV/0!	#DIV/0!	1	1
357	chrUn_NW_020191323v1	0	0	1	0	0	0	1	1	#DIV/0!	#DIV/0!	1	1
361	chrUn_NW_020191331v1	0	0	1	0	0	0	1	1	#DIV/0!	#DIV/0!	1	1
362	chrUn_NW_020191333v1	0	0	1	0	0	0	1	1	#DIV/0!	#DIV/0!	1	1
363	chrUn_NW_020191339v1	0	0	1	0	0	0	1	1	#DIV/0!	#DIV/0!	1	1
368	chrUn_NW_020191357v1	0	0	1	0	0	0	1	1	#DIV/0!	#DIV/0!	1	1
374	chrUn_NW_020191376v1	0	0	1	0	0	0	1	1	#DIV/0!	#DIV/0!	1	1
375	chrUn_NW_020191377v1	0	0	1	0	0	0	1	1	#DIV/0!	#DIV/0!	1	1
377	chrUn_NW_020191386v1	0	0	1	0	0	0	1	1	#DIV/0!	#DIV/0!	1	1
379	chrUn_NW_020191400v1	0	0	0	0	0	1	0	0	#DIV/0!	#DIV/0!	1	1
387	chrUn_NW_020191426v1	0	0	1	0	0	0	1	1	#DIV/0!	#DIV/0!	1	1
388	chrUn_NW_020191430v1	0	0	1	0	0	0	1	1	#DIV/0!	#DIV/0!	1	1
390	chrUn_NW_020191438v1	0	0	1	0	0	0	1	1	#DIV/0!	#DIV/0!	1	1
393	chrUn_NW_020191445v1	0	0	1	0	0	0	1	1	#DIV/0!	#DIV/0!	1	1
394	chrUn_NW_020191446v1	0	0	0	0	0	1	0	0	#DIV/0!	#DIV/0!	1	1
398	chrUn_NW_020191464v1	0	0	1	0	0	0	1	1	#DIV/0!	#DIV/0!	1	1
400	chrUn_NW_020191468v1	0	0	1	0	0	0	1	1	#DIV/0!	#DIV/0!	1	1
401	chrUn_NW_020191470v1	0	0	1	0	0	0	1	1	#DIV/0!	#DIV/0!	1	1
403	chrUn_NW_020191475v1	0	0	1	0	0	0	1	1	#DIV/0!	#DIV/0!	1	1
404	chrUn_NW_020191479v1	0	0	0	0	0	1	0	0	#DIV/0!	#DIV/0!	1	1
405	chrUn_NW_020191483v1	0	0	1	0	0	0	1	1	#DIV/0!	#DIV/0!	1	1
409	chrUn_NW_020191499v1	0	0	1	0	0	0	1	1	#DIV/0!	#DIV/0!	1	1
410	chrUn_NW_020191505v1	0	0	1	0	0	0	1	1	#DIV/0!	#DIV/0!	1	1
412	chrUn_NW_020191513v1	0	0	1	0	0	0	1	1	#DIV/0!	#DIV/0!	1	1
413	chrUn_NW_020191514v1	0	0	1	0	0	0	1	1	#DIV/0!	#DIV/0!	1	1
426	chrUn_NW_020191590v1	0	0	1	0	0	0	1	1	#DIV/0!	#DIV/0!	1	1
427	chrUn_NW_020191592v1	0	0	1	0	0	0	1	1	#DIV/0!	#DIV/0!	1	1
429	chrUn_NW_020191603v1	0	0	1	0	0	0	1	1	#DIV/0!	#DIV/0!	1	1
431	chrUn_NW_020191611v1	0	0	1	0	0	0	1	1	#DIV/0!	#DIV/0!	1	1
447	chrUn_NW_020191654v1	0	0	0	0	0	1	0	0	#DIV/0!	#DIV/0!	1	1
448	chrUn_NW_020191655v1	0	0	1	0	0	0	1	1	#DIV/0!	#DIV/0!	1	1
449	chrUn_NW_020191657v1	0	0	1	0	0	0	1	1	#DIV/0!	#DIV/0!	1	1
453	chrUn_NW_020191668v1	0	0	1	0	0	0	1	1	#DIV/0!	#DIV/0!	1	1
456	chrUn_NW_020191693v1	0	0	1	0	0	0	1	1	#DIV/0!	#DIV/0!	1	1
457	chrUn_NW_020191695v1	0	0	1	0	0	0	1	1	#DIV/0!	#DIV/0!	1	1
458	chrUn_NW_020191696v1	0	0	1	0	0	0	1	1	#DIV/0!	#DIV/0!	1	1
459	chrUn_NW_020191703v1	0	0	1	0	0	0	1	1	#DIV/0!	#DIV/0!	1	1
462	chrUn_NW_020191710v1	0	0	1	0	0	0	1	1	#DIV/0!	#DIV/0!	1	1
463	chrUn_NW_020191712v1	0	0	1	0	0	0	1	1	#DIV/0!	#DIV/0!	1	1
464	chrUn_NW_020191717v1	0	0	1	0	0	0	1	1	#DIV/0!	#DIV/0!	1	1
479	chrUn_NW_020191785v1	0	0	1	0	0	0	1	1	#DIV/0!	#DIV/0!	1	1
481	chrUn_NW_020191791v1	0	0	0	0	0	1	0	0	#DIV/0!	#DIV/0!	1	1
482	chrUn_NW_020191792v1	0	0	1	0	0	0	1	1	#DIV/0!	#DIV/0!	1	1
483	chrUn_NW_020191794v1	0	0	1	0	0	0	1	1	#DIV/0!	#DIV/0!	1	1
485	chrUn_NW_020191808v1	0	0	1	0	0	0	1	1	#DIV/0!	#DIV/0!	1	1
486	chrUn_NW_020191809v1	0	0	0	0	0	1	0	0	#DIV/0!	#DIV/0!	1	1
488	chrUn_NW_020191817v1	0	0	1	0	0	0	1	1	#DIV/0!	#DIV/0!	1	1
493	chrUn_NW_020191833v1	0	0	1	0	0	0	1	1	#DIV/0!	#DIV/0!	1	1
495	chrUn_NW_020191846v1	0	0	0	0	0	1	0	0	#DIV/0!	#DIV/0!	1	1
501	chrUn_NW_020191857v1	0	0	1	0	0	0	1	1	#DIV/0!	#DIV/0!	1	1
502	chrUn_NW_020191862v1	0	0	1	0	0	0	1	1	#DIV/0!	#DIV/0!	1	1
503	chrUn_NW_020191863v1	0	0	1	0	0	0	1	1	#DIV/0!	#DIV/0!	1	1
505	chrUn_NW_020191866v1	0	0	0	0	0	1	0	0	#DIV/0!	#DIV/0!	1	1
506	chrUn_NW_020191867v1	0	0	1	0	0	0	1	1	#DIV/0!	#DIV/0!	1	1
509	chrUn_NW_020191880v1	0	0	1	0	0	0	1	1	#DIV/0!	#DIV/0!	1	1
510	chrUn_NW_020191887v1	0	0	1	0	0	0	1	1	#DIV/0!	#DIV/0!	1	1
513	chrUn_NW_020191896v1	0	0	1	0	0	0	1	1	#DIV/0!	#DIV/0!	1	1
515	chrUn_NW_020191905v1	0	0	1	0	0	0	1	1	#DIV/0!	#DIV/0!	1	1
519	chrUn_NW_020191926v1	0	0	1	0	0	0	1	1	#DIV/0!	#DIV/0!	1	1
522	chrUn_NW_020191949v1	0	0	1	0	0	0	1	1	#DIV/0!	#DIV/0!	1	1
524	chrUn_NW_020191955v1	0	0	0	0	0	1	0	0	#DIV/0!	#DIV/0!	1	1
525	chrUn_NW_020191958v1	0	0	0	0	0	1	0	0	#DIV/0!	#DIV/0!	1	1
526	chrUn_NW_020191963v1	0	0	1	0	0	0	1	1	#DIV/0!	#DIV/0!	1	1
528	chrUn_NW_020191973v1	0	0	1	0	0	0	1	1	#DIV/0!	#DIV/0!	1	1
530	chrUn_NW_020191978v1	0	0	1	0	0	0	1	1	#DIV/0!	#DIV/0!	1	1
532	chrUn_NW_020191981v1	0	0	0	0	0	1	0	0	#DIV/0!	#DIV/0!	1	1
536	chrUn_NW_020192009v1	0	0	1	0	0	0	1	1	#DIV/0!	#DIV/0!	1	1
543	chrUn_NW_020192020v1	0	0	1	0	0	0	1	1	#DIV/0!	#DIV/0!	1	1
546	chrUn_NW_020192029v1	0	0	1	0	0	0	1	1	#DIV/0!	#DIV/0!	1	1
547	chrUn_NW_020192048v1	0	0	1	0	0	0	1	1	#DIV/0!	#DIV/0!	1	1
548	chrUn_NW_020192049v1	0	0	1	0	0	0	1	1	#DIV/0!	#DIV/0!	1	1
551	chrUn_NW_020192054v1	0	0	1	0	0	0	1	1	#DIV/0!	#DIV/0!	1	1
554	chrUn_NW_020192060v1	0	0	1	0	0	0	1	1	#DIV/0!	#DIV/0!	1	1
555	chrUn_NW_020192063v1	0	0	1	0	0	0	1	1	#DIV/0!	#DIV/0!	1	1
559	chrUn_NW_020192078v1	0	0	1	0	0	0	1	1	#DIV/0!	#DIV/0!	1	1
561	chrUn_NW_020192081v1	0	0	1	0	0	0	1	1	#DIV/0!	#DIV/0!	1	1
569	chrUn_NW_020192102v1	0	0	1	0	0	0	1	1	#DIV/0!	#DIV/0!	1	1
570	chrUn_NW_020192104v1	0	0	1	0	0	0	1	1	#DIV/0!	#DIV/0!	1	1
572	chrUn_NW_020192117v1	0	0	1	0	0	0	1	1	#DIV/0!	#DIV/0!	1	1
573	chrUn_NW_020192118v1	0	0	1	0	0	0	1	1	#DIV/0!	#DIV/0!	1	1
580	chrUn_NW_020192135v1	0	0	1	0	0	0	1	1	#DIV/0!	#DIV/0!	1	1
582	chrUn_NW_020192140v1	0	0	0	0	0	1	0	0	#DIV/0!	#DIV/0!	1	1
586	chrUn_NW_020192153v1	0	0	1	0	0	0	1	1	#DIV/0!	#DIV/0!	1	1
587	chrUn_NW_020192154v1	0	0	1	0	0	0	1	1	#DIV/0!	#DIV/0!	1	1
588	chrUn_NW_020192157v1	0	0	0	0	0	1	0	0	#DIV/0!	#DIV/0!	1	1
589	chrUn_NW_020192170v1	0	0	1	0	0	0	1	1	#DIV/0!	#DIV/0!	1	1
592	chrUn_NW_020192181v1	0	0	0	0	0	1	0	0	#DIV/0!	#DIV/0!	1	1
599	chrUn_NW_020192205v1	0	0	0	0	0	1	0	0	#DIV/0!	#DIV/0!	1	1
602	chrUn_NW_020192223v1	0	0	1	0	0	0	1	1	#DIV/0!	#DIV/0!	1	1
603	chrUn_NW_020192226v1	0	0	1	0	0	0	1	1	#DIV/0!	#DIV/0!	1	1
616	chrUn_NW_020192268v1	0	0	1	0	0	0	1	1	#DIV/0!	#DIV/0!	1	1
59	chrUn_NW_020190227v1	0	1	0	0	0	0	1	#DIV/0!	#DIV/0!	1	1	0
63	chrUn_NW_020190257v1	0	1	0	0	0	0	1	#DIV/0!	#DIV/0!	1	1	0
95	chrUn_NW_020190400v1	0	1	0	0	0	0	1	#DIV/0!	#DIV/0!	1	1	0
111	chrUn_NW_020190452v1	0	0	0	0	1	0	0	#DIV/0!	#DIV/0!	0	1	0
256	chrUn_NW_020190942v1	0	0	0	0	1	0	0	#DIV/0!	#DIV/0!	0	1	0
444	chrUn_NW_020191642v1	1	0	0	0	0	0	1	#DIV/0!	1	#DIV/0!	1	0
511	chrUn_NW_020191891v1	0	0	0	1	0	0	0	#DIV/0!	0	#DIV/0!	1	0

## Sheet: TableS5B_DMC_genic_region
Table S5B The distribution of differentially methylated cytosine sites among genic structures
annot.type	hyper_CpG	hypo_CpG	hyper-CHG	hypo-CHG	hyper-CHH	hypo-CHH	total CpG	total CHG	total CHH	total DMCs	CpG_hyper%	CHG_hyper%	CHH_hyper%	%_totalDMCs
3UTR	11697	3410	22	15	60	36	15107	37	96	15240	0.774277	0.594595	0.625	0.00695983
5UTR	2161	870	0	1	3	0	3031	1	3	3035	0.712966	0	1	0.00139639
CDS	52689	11057	44	32	101	60	63746	76	161	63983	0.826546	0.578947	0.627329	0.0293679
CpG-deserts	1212314	393963	3471	2873	10904	9307	1606277	6344	20211	1632832	0.754735	0.547131	0.539508	0.740015
CpG-islands	74588	16954	51	38	82	48	91542	89	130	91761	0.814795	0.573034	0.630769	0.0421736
CpG-shelves	125754	40229	253	224	646	510	165983	477	1156	167616	0.757632	0.530398	0.558824	0.0764687
CpG-shores	232272	60408	334	250	784	579	292680	584	1363	294627	0.793604	0.571918	0.575202	0.134838
downstream	37555	11322	61	41	191	129	48877	102	320	49299	0.768357	0.598039	0.596875	0.0225177
exons	66546	15361	66	48	164	96	81907	114	260	82281	0.812458	0.578947	0.630769	0.0377347
genes	510775	168844	1157	896	3447	2697	679619	2053	6144	687816	0.751561	0.563566	0.561035	0.313102
inter	1134153	342710	2952	2489	8969	7747	1476863	5441	16716	1499020	0.767947	0.542547	0.536552	0.680394
introns	444663	153488	1091	851	3280	2596	598151	1942	5876	605969	0.743396	0.561792	0.558203	0.275569
promoters	37042	10879	43	28	136	84	47921	71	220	48212	0.772981	0.605634	0.618182	0.0220773
repeats	467083	174114	1823	1619	5779	5082	641197	3442	10861	655500	0.728455	0.529634	0.532087	0.295401
transcripts	512606	169476	1161	897	3461	2706	682082	2058	6167	690307	0.751531	0.56414	0.561213	0.314237
TSS	9	9	0	0	0	0	18	0	0	18	0.5
	hyper	hypo	total	hyper%
CpG	1644928	511554	2156482	0.762783	0.98612
CHG	4109	3385	7494	0.548305
CHH	12416	10444	22860	0.543132
			2186836

## Sheet: TableS5C_DMC_repeats
Table s5C The distribution of differentially methylated cytosine sites among repeat elements
repeats	context	status	number
DNA	CpG	hyper	30939
LINE	CpG	hyper	168790
LTR	CpG	hyper	65870
Satellite	CpG	hyper	1660
Simple_repeat	CpG	hyper	6406
SINE	CpG	hyper	190456
DNA	CpG	hypo	10819
LINE	CpG	hypo	69004
LTR	CpG	hypo	19259
Satellite	CpG	hypo	415
Simple_repeat	CpG	hypo	1885
SINE	CpG	hypo	71898
DNA	CHG	hyper	106
LINE	CHG	hyper	654
LTR	CHG	hyper	203
Satellite	CHG	hyper	9
Simple_repeat	CHG	hyper	6
SINE	CHG	hyper	842
DNA	CHG	hypo	66
LINE	CHG	hypo	648
LTR	CHG	hypo	152
Satellite	CHG	hypo	17
Simple_repeat	CHG	hypo	9
SINE	CHG	hypo	726
DNA	CHH	hyper	322
LINE	CHH	hyper	2565
LTR	CHH	hyper	494
Satellite	CHH	hyper	17
Simple_repeat	CHH	hyper	68
SINE	CHH	hyper	2296
DNA	CHH	hypo	226
LINE	CHH	hypo	2313
LTR	CHH	hypo	437
Satellite	CHH	hypo	49
Simple_repeat	CHH	hypo	62
SINE	CHH	hypo	1977
Notes: DNA: DNA transposon, LTR: long terminal repeat retrotransposon, SINE: short interspersed nuclear elements, LINE: long interspersed nuclear elements
