# Supplementary material for: Genome-Wide DNA Methylation and Transcriptome Integration Associates DNA Methylation Changes with Bovine Subclinical Mastitis Caused by Staphylococcus chromogenes
Source: Int J Mol Sci. 2023 Jun 20;24(12):10369. doi: 10.3390/ijms241210369 (PMC10299661; doi:10.3390/ijms241210369)
Supplement: Supplementary file 1 [file ijms-24-10369-s001.zip › TableS6 List of differentially methylated regions identified based on CpG sites;.xlsx]

## Sheet: TableS6A_SC_CpG_DMR_list
Table S6A List of differentially methylated regions identified based on CpG sites;
seqnames	start	end	DM_status	pvalue	qvalue	meth.diff
chr1	635001	636000	hyper	1.57793e-27	1.30652e-26	21.2661
chr1	640001	641000	hyper	9.32239e-73	3.49245e-71	27.4488
chr1	670001	671000	hypo	8.01985e-166	2.04099e-163	-28.4573
chr1	805001	806000	hyper	4.60203e-28	3.90711e-27	20.3858
chr1	945001	946000	hyper	7.60571e-111	6.91685e-109	34.0467
chr1	956001	957000	hyper	2.41841e-43	3.74985e-42	25.7472
chr1	968001	969000	hypo	6.35283e-45	1.04108e-43	-26.1857
chr1	1019001	1020000	hyper	1.08599e-48	2.02464e-47	34.5392
chr1	1020001	1021000	hyper	6.51524e-25	4.77212e-24	24.1327
chr1	1124001	1125000	hyper	3.6797e-25	2.72746e-24	21.0955
chr1	1138001	1139000	hyper	8.73236e-27	6.99694e-26	24.526
chr1	1167001	1168000	hyper	5.36088e-31	5.1815e-30	21.6773
chr1	1257001	1258000	hyper	1.00113e-31	9.9837e-31	23.292
chr1	1297001	1298000	hyper	6.6147e-46	1.12144e-44	21.3912
chr1	1351001	1352000	hyper	4.63992e-42	6.88107e-41	31.7561
chr1	1359001	1360000	hypo	7.1434e-28	6.0107e-27	-26.2688
chr1	1443001	1444000	hyper	9.38154e-31	8.97462e-30	22.9925
chr1	1448001	1449000	hypo	1.40301e-26	1.11305e-25	-23.0531
chr1	1464001	1465000	hypo	7.07724e-48	1.28512e-46	-28.3657
chr1	1486001	1487000	hyper	2.20921e-32	2.26746e-31	21.9656
chr1	1533001	1534000	hyper	5.3949e-45	8.86212e-44	22.2074
chr1	1544001	1545000	hyper	1.54745e-73	5.92713e-72	39.6847
chr1	1548001	1549000	hyper	8.03872e-23	5.30242e-22	24.3334
chr1	1557001	1558000	hyper	2.10934e-37	2.64565e-36	21.7862
chr1	1558001	1559000	hyper	1.56749e-48	2.90664e-47	28.7047
chr1	1562001	1563000	hyper	2.41682e-20	1.39263e-19	22.103
chr1	1563001	1564000	hyper	2.07315e-32	2.1299e-31	28.0627
chr1	1581001	1582000	hyper	8.95892e-24	6.20231e-23	24.3244
chr1	1601001	1602000	hyper	3.50634e-26	2.72988e-25	20.3459
chr1	1602001	1603000	hyper	2.64365e-44	4.23623e-43	33.0407
chr1	1606001	1607000	hypo	1.48173e-56	3.5525e-55	-29.5915
chr1	1607001	1608000	hypo	7.67593e-31	7.3706e-30	-24.468
chr1	1622001	1623000	hyper	1.37739e-83	6.80259e-82	41.2872
chr1	1624001	1625000	hyper	4.1252e-30	3.83632e-29	24.6646
chr1	1633001	1634000	hyper	1.56299e-26	1.23694e-25	21.5865
chr1	1654001	1655000	hypo	1.01347e-69	3.51219e-68	-31.6502
chr1	1660001	1661000	hyper	4.87043e-28	4.13059e-27	25.0328
chr1	1685001	1686000	hyper	4.16927e-68	1.38269e-66	25.8928
chr1	1686001	1687000	hyper	7.91355e-46	1.33772e-44	25.7037
chr1	1687001	1688000	hyper	6.63411e-93	4.06651e-91	28.6234
chr1	1711001	1712000	hyper	3.37532e-153	6.92167e-151	35.7674
chr1	1728001	1729000	hyper	6.80013e-87	3.6338e-85	35.646
chr1	1729001	1730000	hyper	4.74479e-69	1.61638e-67	36.3502
chr1	1733001	1734000	hyper	3.7378e-52	7.83211e-51	38.0227
chr1	1734001	1735000	hyper	4.92565e-29	4.366e-28	22.5017
chr1	1811001	1812000	hyper	4.92624e-47	8.69862e-46	24.9754
chr1	1821001	1822000	hyper	1.49991e-37	1.89236e-36	28.8362
chr1	1929001	1930000	hypo	1.62927e-90	9.4365e-89	-38.685
chr1	2025001	2026000	hypo	1.04037e-20	6.11666e-20	-24.5136
chr1	2085001	2086000	hyper	3.47635e-20	1.98495e-19	20.4181
chr1	2121001	2122000	hyper	7.91776e-72	2.90092e-70	40.0407
chr1	2122001	2123000	hyper	1.32529e-72	4.9489e-71	30.528
chr1	2147001	2148000	hyper	1.57923e-30	1.49514e-29	31.9347
chr1	2172001	2173000	hypo	3.78668e-35	4.35172e-34	-21.3431
chr1	2182001	2183000	hypo	5.32728e-33	5.60714e-32	-28.3776
chr1	2195001	2196000	hyper	5.71648e-50	1.11357e-48	26.0728
chr1	2213001	2214000	hyper	4.17842e-51	8.46151e-50	34.7528
chr1	2233001	2234000	hypo	1.32269e-45	2.2189e-44	-25.1287
chr1	2284001	2285000	hypo	6.19319e-51	1.24743e-49	-20.9417
chr1	2329001	2330000	hypo	2.4225e-30	2.27521e-29	-22.2353
chr1	2331001	2332000	hyper	2.51039e-34	2.79002e-33	20.1374
chr1	2358001	2359000	hypo	6.1522e-44	9.72778e-43	-21.9906
chr1	2369001	2370000	hyper	4.61479e-27	3.74302e-26	23.9381
chr1	2381001	2382000	hypo	2.21406e-30	2.08291e-29	-25.1098
chr1	2425001	2426000	hyper	1.62413e-22	1.05384e-21	23.4021
chr1	2457001	2458000	hyper	4.38813e-139	6.99892e-137	41.8255
chr1	2477001	2478000	hyper	6.4565e-32	6.49456e-31	22.0885
chr1	2509001	2510000	hypo	5.94086e-184	2.01821e-181	-40.6011
chr1	2542001	2543000	hyper	1.97836e-48	3.65511e-47	30.8406
chr1	2554001	2555000	hyper	1.99562e-40	2.79105e-39	26.6571
chr1	2619001	2620000	hyper	1.9859e-31	1.95564e-30	21.298
chr1	2622001	2623000	hyper	5.8084e-22	3.65467e-21	26.0209
chr1	2632001	2633000	hyper	1.34971e-26	1.07156e-25	20.6149
chr1	2659001	2660000	hyper	5.54227e-61	1.50694e-59	25.5298
chr1	2722001	2723000	hypo	6.30949e-39	8.35988e-38	-22.3972
chr1	2745001	2746000	hypo	4.28328e-30	3.98022e-29	-20.9335
chr1	2770001	2771000	hypo	1.28821e-158	2.87966e-156	-52.5123
chr1	2791001	2792000	hypo	2.35966e-18	1.21216e-17	-22.9248
chr1	2858001	2859000	hypo	2.3795e-61	6.54604e-60	-26.2973
chr1	2877001	2878000	hyper	1.75723e-21	1.07859e-20	22.8676
chr1	2897001	2898000	hypo	7.40602e-50	1.43658e-48	-24.9456
chr1	2940001	2941000	hyper	3.45253e-43	5.32268e-42	23.546
chr1	2968001	2969000	hypo	5.61281e-49	1.05627e-47	-20.9106
chr1	2971001	2972000	hyper	4.13758e-79	1.82146e-77	34.967
chr1	2974001	2975000	hyper	1.44689e-35	1.68913e-34	22.9542
chr1	3011001	3012000	hyper	9.4887e-98	6.52159e-96	24.4865
chr1	3031001	3032000	hyper	2.69464e-42	4.02801e-41	23.4834
chr1	3058001	3059000	hyper	1.50907e-22	9.80731e-22	21.1539
chr1	3077001	3078000	hyper	1.48113e-33	1.59345e-32	23.8171
chr1	3078001	3079000	hyper	1.47989e-26	1.17254e-25	23.0144
chr1	3125001	3126000	hypo	2.29824e-52	4.84642e-51	-21.8112
chr1	3294001	3295000	hyper	2.68248e-46	4.60953e-45	22.4534
chr1	3371001	3372000	hyper	8.75431e-41	1.24052e-39	33.662
chr1	3459001	3460000	hypo	7.94209e-32	7.96065e-31	-21.893
chr1	3502001	3503000	hypo	2.37599e-50	4.68493e-49	-22.1254
chr1	3562001	3563000	hyper	2.55412e-62	7.25075e-61	28.2603
chr1	3569001	3570000	hyper	9.67655e-51	1.93484e-49	30.2511
chr1	3581001	3582000	hyper	2.40812e-128	3.12951e-126	36.6834
chr1	3621001	3622000	hypo	1.2974e-50	2.58078e-49	-23.2729
chr1	3636001	3637000	hyper	1.55162e-62	4.43145e-61	24.9022
chr1	3706001	3707000	hyper	2.75148e-30	2.57829e-29	20.8684
chr1	3734001	3735000	hypo	5.34249e-22	3.36803e-21	-22.0802
chr1	3758001	3759000	hyper	5.13055e-39	6.82066e-38	27.2036
chr1	3835001	3836000	hyper	1.20019e-81	5.65045e-80	35.5396
chr1	3859001	3860000	hyper	6.92341e-41	9.84569e-40	22.3042
chr1	3909001	3910000	hyper	2.23516e-125	2.7394e-123	39.0129
chr1	3969001	3970000	hyper	1.88395e-47	3.37287e-46	35.3541
chr1	3998001	3999000	hyper	4.55133e-48	8.31091e-47	25.4244
chr1	4008001	4009000	hyper	1.85299e-83	9.1279e-82	25.4574
chr1	4021001	4022000	hyper	2.17594e-109	1.92042e-107	32.9478
chr1	4032001	4033000	hyper	1.70445e-74	6.69727e-73	36.7042
chr1	4106001	4107000	hyper	2.12272e-24	1.51718e-23	21.8871
chr1	4142001	4143000	hyper	1.27179e-53	2.79041e-52	33.2016
chr1	4156001	4157000	hyper	2.35036e-39	3.16088e-38	31.178
chr1	4195001	4196000	hypo	1.03602e-52	2.20911e-51	-26.6133
chr1	4196001	4197000	hypo	8.76965e-110	7.79305e-108	-33.9777
chr1	4201001	4202000	hyper	2.67611e-64	8.01891e-63	22.6866
chr1	4224001	4225000	hyper	1.65898e-47	2.97543e-46	32.0526
chr1	4273001	4274000	hyper	2.42776e-60	6.48466e-59	24.1212
chr1	4304001	4305000	hypo	9.52236e-35	1.07736e-33	-21.0363
chr1	4318001	4319000	hyper	7.47097e-38	9.52585e-37	23.6796
chr1	4357001	4358000	hyper	1.06289e-79	4.75824e-78	24.0194
chr1	4358001	4359000	hyper	3.23107e-76	1.32209e-74	31.5463
chr1	4362001	4363000	hyper	3.84916e-54	8.5634e-53	24.1804
chr1	4364001	4365000	hypo	7.30908e-42	1.0765e-40	-21.1509
chr1	4380001	4381000	hyper	9.75391e-90	5.56421e-88	35.2907
chr1	4381001	4382000	hyper	7.20294e-74	2.78612e-72	26.462
chr1	4422001	4423000	hyper	7.7509e-23	5.11725e-22	24.2562
chr1	4463001	4464000	hyper	1.01109e-30	9.65952e-30	21.1408
chr1	4506001	4507000	hyper	6.5591e-23	4.3455e-22	22.0321
chr1	4605001	4606000	hyper	7.84636e-47	1.37554e-45	29.2462
chr1	4615001	4616000	hyper	1.00716e-95	6.60889e-94	39.0308
chr1	4618001	4619000	hyper	1.37967e-16	6.33648e-16	20.3695
chr1	4785001	4786000	hyper	1.68892e-17	8.22769e-17	23.1282
chr1	5019001	5020000	hyper	1.98705e-22	1.28335e-21	25.2417
chr1	5082001	5083000	hyper	5.11375e-17	2.41504e-16	21.3956
chr1	5175001	5176000	hyper	1.00516e-45	1.69313e-44	32.1526
chr1	5649001	5650000	hyper	2.16253e-20	1.24923e-19	20.1351
chr1	5665001	5666000	hyper	6.41607e-24	4.47495e-23	27.0007
chr1	5754001	5755000	hyper	6.6095e-25	4.83972e-24	20.9276
chr1	5766001	5767000	hyper	2.65778e-35	3.07375e-34	26.939
chr1	5769001	5770000	hyper	4.04715e-24	2.8518e-23	27.2559
chr1	5770001	5771000	hyper	1.19764e-252	1.16386e-249	39.0824
chr1	5888001	5889000	hyper	6.46943e-39	8.56844e-38	27.9678
chr1	5927001	5928000	hyper	9.1801e-32	9.17079e-31	31.856
chr1	6224001	6225000	hyper	3.84921e-18	1.95186e-17	23.4151
chr1	6395001	6396000	hyper	6.86237e-51	1.38e-49	33.3529
chr1	6493001	6494000	hyper	1.50377e-34	1.68741e-33	24.5594
chr1	6514001	6515000	hyper	1.85255e-37	2.32856e-36	38.5908
chr1	6692001	6693000	hyper	4.2109e-19	2.26072e-18	21.3854
chr1	6791001	6792000	hypo	1.02625e-19	5.7085e-19	-21.7133
chr1	6802001	6803000	hyper	3.75323e-64	1.11961e-62	26.278
chr1	6809001	6810000	hyper	1.25769e-58	3.20966e-57	25.5998
chr1	6810001	6811000	hyper	4.21446e-46	7.18948e-45	26.0015
chr1	6816001	6817000	hyper	1.08263e-76	4.48587e-75	20.9803
chr1	6845001	6846000	hyper	1.08434e-46	1.89015e-45	26.7731
chr1	6853001	6854000	hyper	1.79865e-54	4.0458e-53	23.9551
chr1	6904001	6905000	hyper	4.80855e-34	5.28162e-33	31.2134
chr1	6933001	6934000	hypo	3.01748e-51	6.13801e-50	-31.7423
chr1	6934001	6935000	hypo	4.9716e-25	3.66163e-24	-30.8525
chr1	6961001	6962000	hyper	1.19747e-22	7.82544e-22	22.4867
chr1	6971001	6972000	hyper	5.68331e-29	5.02267e-28	23.8471
chr1	6981001	6982000	hypo	1.39282e-32	1.44055e-31	-22.8911
chr1	6991001	6992000	hypo	1.77039e-16	8.07311e-16	-21.9172
chr1	7006001	7007000	hyper	3.87322e-48	7.08827e-47	22.6478
chr1	7189001	7190000	hyper	3.12223e-37	3.89075e-36	30.3038
chr1	7342001	7343000	hyper	6.42489e-67	2.07359e-65	26.3982
chr1	7437001	7438000	hypo	1.74468e-30	1.64896e-29	-26.5311
chr1	7443001	7444000	hyper	6.37467e-30	5.88096e-29	24.9517
chr1	7550001	7551000	hypo	9.26968e-25	6.74096e-24	-29.7728
chr1	7573001	7574000	hyper	1.95614e-71	7.08887e-70	36.5187
chr1	7574001	7575000	hyper	2.15818e-35	2.50334e-34	25.8138
chr1	7772001	7773000	hyper	7.18324e-18	3.58122e-17	22.1049
chr1	7941001	7942000	hyper	2.79896e-23	1.88973e-22	29.3263
chr1	8147001	8148000	hyper	9.85056e-60	2.58879e-58	29.1805
chr1	8815001	8816000	hypo	1.02449e-47	1.85045e-46	-30.494
chr1	9230001	9231000	hyper	3.8776e-15	1.61479e-14	21.2306
chr1	9236001	9237000	hypo	2.15541e-18	1.11004e-17	-23.1826
chr1	9245001	9246000	hyper	2.84248e-37	3.54828e-36	27.9006
chr1	9586001	9587000	hyper	8.2995e-74	3.20097e-72	24.7082
chr1	9710001	9711000	hyper	2.89145e-38	3.74125e-37	25.3317
chr1	9840001	9841000	hyper	4.70643e-20	2.66758e-19	23.2778
chr1	9988001	9989000	hyper	3.57168e-28	3.04748e-27	23.1418
chr1	10060001	10061000	hyper	7.92323e-39	1.04608e-37	24.6775
chr1	10181001	10182000	hypo	3.84957e-18	1.95202e-17	-21.8956
chr1	10188001	10189000	hyper	7.7777e-31	7.46702e-30	22.3146
chr1	10293001	10294000	hyper	2.43111e-36	2.9256e-35	23.7087
chr1	10294001	10295000	hyper	3.99416e-65	1.22475e-63	35.5921
chr1	10295001	10296000	hyper	6.00512e-62	1.68408e-60	37.0867
chr1	10296001	10297000	hyper	2.98141e-21	1.80698e-20	20.3325
chr1	10316001	10317000	hyper	2.4929e-29	2.23861e-28	24.9697
chr1	10320001	10321000	hyper	9.25084e-27	7.40414e-26	23.3243
chr1	10321001	10322000	hyper	4.326e-49	8.17297e-48	26.3792
chr1	10346001	10347000	hyper	3.60659e-27	2.94015e-26	20.8222
chr1	10381001	10382000	hyper	8.06457e-46	1.36298e-44	23.8856
chr1	10406001	10407000	hyper	4.17832e-28	3.55384e-27	21.1288
chr1	10429001	10430000	hyper	9.62801e-39	1.26716e-37	25.8323
chr1	10430001	10431000	hyper	3.18066e-51	6.46547e-50	26.7815
chr1	10503001	10504000	hyper	8.59669e-118	8.96092e-116	34.3883
chr1	10512001	10513000	hyper	2.37001e-49	4.52172e-48	24.9553
chr1	10519001	10520000	hyper	1.323e-91	7.87552e-90	37.0102
chr1	10520001	10521000	hyper	8.08765e-88	4.41583e-86	37.6549
chr1	10522001	10523000	hyper	4.17228e-55	9.56618e-54	29.1751
chr1	10558001	10559000	hypo	8.2038e-18	4.07591e-17	-22.0656
chr1	10565001	10566000	hyper	4.14706e-22	2.63015e-21	20.8378
chr1	10580001	10581000	hyper	1.31698e-54	2.97409e-53	28.9866
chr1	10729001	10730000	hypo	1.54137e-38	2.01372e-37	-30.2987
chr1	11052001	11053000	hyper	4.11584e-21	2.47539e-20	20.9632
chr1	11072001	11073000	hyper	1.68491e-15	7.19079e-15	20.0527
chr1	11216001	11217000	hyper	4.59373e-15	1.90345e-14	21.225
chr1	12242001	12243000	hyper	4.98396e-41	7.13196e-40	26.2297
chr1	12465001	12466000	hyper	5.49886e-30	5.08548e-29	28.7251
chr1	14471001	14472000	hyper	8.36018e-18	4.15173e-17	24.05
chr1	15820001	15821000	hyper	8.53274e-20	4.76813e-19	26.2485
chr1	16245001	16246000	hyper	6.44606e-14	2.45766e-13	22.0314
chr1	17461001	17462000	hyper	9.3004e-14	3.50664e-13	22.1923
chr1	17660001	17661000	hyper	1.11356e-35	1.30642e-34	27.17
chr1	18464001	18465000	hyper	1.22827e-14	4.93869e-14	20.3086
chr1	19103001	19104000	hyper	3.40903e-17	1.62794e-16	21.2723
chr1	19104001	19105000	hyper	7.37025e-22	4.61314e-21	23.9658
chr1	19108001	19109000	hypo	9.48391e-22	5.90239e-21	-21.1902
chr1	19265001	19266000	hypo	4.68205e-32	4.73905e-31	-22.3134
chr1	19307001	19308000	hyper	8.51009e-34	9.24675e-33	23.5136
chr1	19331001	19332000	hypo	8.69243e-25	6.32988e-24	-24.4623
chr1	19338001	19339000	hyper	1.7829e-36	2.15755e-35	25.2347
chr1	19339001	19340000	hyper	1.57437e-97	1.07601e-95	37.9541
chr1	19340001	19341000	hyper	9.25411e-62	2.57991e-60	25.8707
chr1	19357001	19358000	hyper	9.5912e-17	4.45026e-16	20.1953
chr1	19406001	19407000	hyper	1.98768e-36	2.40014e-35	25.1164
chr1	19408001	19409000	hyper	5.84927e-38	7.4809e-37	25.3309
chr1	19482001	19483000	hypo	3.0131e-16	1.35316e-15	-21.2912
chr1	19484001	19485000	hyper	7.28168e-74	2.81559e-72	31.1254
chr1	19488001	19489000	hypo	1.2868e-38	1.68591e-37	-26.7401
chr1	19492001	19493000	hyper	2.19373e-25	1.64331e-24	21.2897
chr1	19494001	19495000	hyper	5.21017e-26	4.0234e-25	23.2912
chr1	19500001	19501000	hyper	1.09637e-28	9.56647e-28	23.5486
chr1	19518001	19519000	hyper	1.22766e-22	8.01889e-22	20.1445
chr1	19560001	19561000	hypo	4.93552e-33	5.20191e-32	-26.316
chr1	19623001	19624000	hyper	6.93289e-52	1.43999e-50	38.2641
chr1	20387001	20388000	hyper	1.10267e-139	1.78333e-137	37.6463
chr1	20388001	20389000	hyper	2.71685e-67	8.84186e-66	35.0709
chr1	20407001	20408000	hyper	4.39445e-23	2.93654e-22	24.6025
chr1	20420001	20421000	hyper	4.30233e-35	4.93527e-34	32.0807
chr1	20435001	20436000	hyper	1.80564e-29	1.63264e-28	22.8906
chr1	20437001	20438000	hyper	2.74738e-66	8.71647e-65	44.7087
chr1	20438001	20439000	hyper	2.71879e-50	5.3527e-49	36.7686
chr1	20439001	20440000	hyper	1.04278e-77	4.43672e-76	42.2766
chr1	20440001	20441000	hyper	1.49558e-80	6.85385e-79	34.5935
chr1	20587001	20588000	hypo	2.23201e-21	1.36207e-20	-28.0376
chr1	20734001	20735000	hyper	2.16498e-76	8.88844e-75	35.333
chr1	20975001	20976000	hyper	4.99921e-61	1.36097e-59	35.7763
chr1	21049001	21050000	hyper	2.97169e-20	1.70326e-19	24.2811
chr1	21054001	21055000	hyper	1.41522e-61	3.92302e-60	30.1633
chr1	21089001	21090000	hyper	7.95118e-22	4.96685e-21	21.9932
chr1	21110001	21111000	hyper	2.67333e-62	7.58426e-61	26.7087
chr1	21157001	21158000	hyper	1.6089e-24	1.15644e-23	20.8902
chr1	21465001	21466000	hyper	5.52897e-39	7.33967e-38	26.9031
chr1	21466001	21467000	hyper	9.39359e-32	9.37766e-31	31.6411
chr1	21530001	21531000	hyper	4.76238e-23	3.17801e-22	25.9994
chr1	21534001	21535000	hyper	6.23212e-26	4.79368e-25	29.179
chr1	21549001	21550000	hyper	2.25649e-38	2.92891e-37	30.9979
chr1	21550001	21551000	hyper	4.47612e-43	6.87322e-42	31.7687
chr1	21551001	21552000	hyper	7.62065e-47	1.33698e-45	23.014
chr1	21595001	21596000	hyper	5.64813e-139	8.98899e-137	37.4057
chr1	21655001	21656000	hypo	7.55877e-144	1.32227e-141	-48.5539
chr1	21670001	21671000	hyper	4.30223e-45	7.09081e-44	30.4759
chr1	21777001	21778000	hypo	1.36858e-34	1.53846e-33	-29.8703
chr1	21897001	21898000	hypo	3.5861e-13	1.29185e-12	-20.5334
chr1	21904001	21905000	hypo	2.01947e-40	2.82404e-39	-32.2361
chr1	21908001	21909000	hyper	2.00906e-63	5.88129e-62	43.3625
chr1	21927001	21928000	hyper	3.61819e-22	2.30227e-21	26.9184
chr1	22009001	22010000	hypo	5.70437e-26	4.39498e-25	-23.6776
chr1	22012001	22013000	hypo	8.62905e-55	1.95944e-53	-39.2251
chr1	22101001	22102000	hypo	1.32166e-26	1.04981e-25	-27.3424
chr1	22126001	22127000	hypo	3.57533e-52	7.49666e-51	-42.3284
chr1	22214001	22215000	hyper	2.16167e-35	2.50732e-34	25.7594
chr1	22280001	22281000	hypo	8.52637e-31	8.16935e-30	-24.7648
chr1	22287001	22288000	hyper	2.6756e-54	5.98162e-53	37.0431
chr1	22409001	22410000	hyper	1.03999e-33	1.12573e-32	27.4151
chr1	22536001	22537000	hypo	1.9568e-25	1.46918e-24	-28.1613
chr1	22579001	22580000	hyper	4.02283e-26	3.12336e-25	25.1513
chr1	22665001	22666000	hypo	7.17295e-30	6.60243e-29	-23.4147
chr1	22738001	22739000	hypo	9.17328e-58	2.28191e-56	-45.7071
chr1	22913001	22914000	hyper	1.73818e-23	1.18576e-22	20.544
chr1	22957001	22958000	hyper	5.87903e-20	3.31602e-19	24.4434
chr1	24512001	24513000	hyper	2.02177e-23	1.37447e-22	25.4817
chr1	24712001	24713000	hyper	3.83445e-18	1.9446e-17	24.6361
chr1	24817001	24818000	hyper	1.40039e-29	1.2724e-28	30.1988
chr1	25095001	25096000	hyper	5.42832e-41	7.7552e-40	29.88
chr1	25282001	25283000	hyper	4.27515e-16	1.89992e-15	23.3123
chr1	25582001	25583000	hyper	1.59897e-16	7.31369e-16	22.977
chr1	25588001	25589000	hyper	7.01652e-20	3.94107e-19	27.0703
chr1	26375001	26376000	hyper	5.93627e-20	3.34711e-19	21.5008
chr1	26835001	26836000	hyper	4.05378e-19	2.17871e-18	25.9932
chr1	26887001	26888000	hypo	1.47299e-13	5.46764e-13	-21.2065
chr1	27172001	27173000	hypo	2.73099e-30	2.55931e-29	-27.6558
chr1	27213001	27214000	hyper	1.59382e-24	1.1459e-23	27.6437
chr1	27603001	27604000	hyper	3.43996e-21	2.07768e-20	22.5405
chr1	27815001	27816000	hyper	1.10737e-19	6.14708e-19	21.5725
chr1	28500001	28501000	hyper	8.72374e-62	2.43468e-60	43.3176
chr1	28523001	28524000	hypo	5.04492e-95	3.25022e-93	-33.3258
chr1	28814001	28815000	hyper	7.8269e-17	3.65278e-16	23.9672
chr1	29033001	29034000	hyper	1.68618e-16	7.70103e-16	23.4147
chr1	29040001	29041000	hypo	1.58794e-28	1.37535e-27	-27.2958
chr1	29093001	29094000	hyper	1.00824e-22	6.6145e-22	24.7363
chr1	29106001	29107000	hypo	4.35709e-35	4.99705e-34	-24.9901
chr1	29588001	29589000	hyper	1.25248e-40	1.76502e-39	26.7438
chr1	29617001	29618000	hyper	2.28788e-29	2.05829e-28	33.6127
chr1	29670001	29671000	hyper	3.95486e-16	1.76155e-15	20.1931
chr1	31305001	31306000	hyper	1.45183e-17	7.1033e-17	24.6306
chr1	33373001	33374000	hypo	2.64825e-67	8.62181e-66	-28.3535
chr1	33436001	33437000	hyper	9.42397e-25	6.85066e-24	30.3809
chr1	35110001	35111000	hyper	4.37027e-37	5.41389e-36	24.9552
chr1	35456001	35457000	hypo	2.36402e-23	1.60159e-22	-20.6083
chr1	35606001	35607000	hyper	3.01343e-36	3.61153e-35	31.0314
chr1	35748001	35749000	hyper	8.96767e-32	8.96346e-31	29.9944
chr1	35768001	35769000	hyper	2.59342e-27	2.1267e-26	32.1003
chr1	36033001	36034000	hypo	1.92079e-37	2.4131e-36	-35.5521
chr1	36158001	36159000	hyper	1.95711e-35	2.27371e-34	26.1261
chr1	36636001	36637000	hyper	8.41539e-16	3.66868e-15	20.4799
chr1	36711001	36712000	hyper	2.15279e-23	1.46137e-22	27.0967
chr1	37195001	37196000	hyper	9.55113e-25	6.94127e-24	22.3483
chr1	37309001	37310000	hyper	1.03306e-29	9.44269e-29	27.2994
chr1	37655001	37656000	hyper	4.28682e-31	4.16087e-30	23.0038
chr1	37809001	37810000	hyper	2.06243e-16	9.36382e-16	21.1165
chr1	37921001	37922000	hyper	1.96368e-25	1.47425e-24	23.0582
chr1	38176001	38177000	hyper	4.22366e-73	1.59881e-71	37.5037
chr1	38330001	38331000	hyper	2.63282e-45	4.37098e-44	33.5324
chr1	38331001	38332000	hyper	4.41582e-51	8.93443e-50	31.1291
chr1	38559001	38560000	hyper	4.27278e-64	1.27347e-62	25.8245
chr1	38565001	38566000	hyper	1.69498e-15	7.23243e-15	25.2157
chr1	38596001	38597000	hyper	1.10265e-31	1.09774e-30	30.1033
chr1	39279001	39280000	hyper	1.41772e-24	1.02189e-23	24.8191
chr1	42115001	42116000	hyper	1.1841e-55	2.76044e-54	33.694
chr1	42134001	42135000	hyper	3.53238e-40	4.89483e-39	24.852
chr1	42148001	42149000	hyper	3.02453e-39	4.05227e-38	35.8515
chr1	42157001	42158000	hyper	6.17727e-36	7.31628e-35	27.3602
chr1	42221001	42222000	hyper	1.18445e-58	3.02451e-57	36.7864
chr1	42226001	42227000	hyper	5.37417e-58	1.34754e-56	26.3918
chr1	42227001	42228000	hyper	6.63285e-25	4.85641e-24	20.9681
chr1	42268001	42269000	hyper	1.93809e-21	1.18653e-20	25.8758
chr1	42279001	42280000	hyper	3.37871e-17	1.6139e-16	23.6617
chr1	42280001	42281000	hyper	5.12293e-36	6.08625e-35	26.7719
chr1	42285001	42286000	hyper	1.95038e-25	1.46452e-24	24.5525
chr1	42905001	42906000	hyper	1.95155e-31	1.92285e-30	27.2159
chr1	42912001	42913000	hypo	8.1795e-51	1.64043e-49	-36.6007
chr1	42925001	42926000	hyper	6.33565e-29	5.5867e-28	26.0051
chr1	42950001	42951000	hyper	1.02754e-52	2.19144e-51	22.2229
chr1	43032001	43033000	hypo	1.1411e-31	1.13542e-30	-31.4274
chr1	43041001	43042000	hypo	3.16177e-48	5.80199e-47	-35.119
chr1	43047001	43048000	hyper	2.7542e-31	2.69766e-30	32.4974
chr1	43059001	43060000	hypo	2.94853e-88	1.62463e-86	-36.726
chr1	43070001	43071000	hyper	3.13357e-54	6.99194e-53	29.0374
chr1	43072001	43073000	hyper	2.34842e-25	1.75679e-24	25.3437
chr1	43089001	43090000	hypo	9.70407e-35	1.0977e-33	-34.1231
chr1	43141001	43142000	hyper	3.26099e-59	8.45224e-58	42.1781
chr1	43154001	43155000	hypo	5.2466e-24	3.67523e-23	-25.1277
chr1	43191001	43192000	hypo	2.40771e-50	4.74642e-49	-31.705
chr1	43390001	43391000	hyper	3.48948e-29	3.11342e-28	27.7828
chr1	43453001	43454000	hyper	1.21521e-28	1.05815e-27	22.2564
chr1	43859001	43860000	hyper	3.2244e-14	1.25832e-13	22.14
chr1	43902001	43903000	hypo	1.50494e-49	2.88946e-48	-22.4323
chr1	43948001	43949000	hyper	2.89624e-28	2.48018e-27	29.063
chr1	44043001	44044000	hyper	1.19176e-37	1.50843e-36	30.5219
chr1	44160001	44161000	hypo	1.38562e-28	1.20365e-27	-22.5353
chr1	44230001	44231000	hyper	3.50301e-18	1.78036e-17	24.1446
chr1	44346001	44347000	hyper	6.65357e-15	2.72685e-14	23.1713
chr1	44347001	44348000	hypo	1.15713e-21	7.17089e-21	-23.8358
chr1	44352001	44353000	hypo	2.38898e-70	8.42462e-69	-35.1264
chr1	44487001	44488000	hypo	1.51529e-25	1.14366e-24	-20.0539
chr1	44544001	44545000	hypo	2.55523e-14	1.00419e-13	-20.421
chr1	44552001	44553000	hyper	1.65287e-19	9.08446e-19	20.5939
chr1	44563001	44564000	hypo	1.28173e-52	2.72417e-51	-34.8069
chr1	44564001	44565000	hypo	1.73312e-97	1.18321e-95	-40.7486
chr1	44565001	44566000	hypo	2.98829e-84	1.49928e-82	-39.9705
chr1	44602001	44603000	hyper	1.83676e-22	1.18835e-21	20.4316
chr1	44636001	44637000	hyper	1.76753e-35	2.05732e-34	30.6735
chr1	44686001	44687000	hyper	8.65216e-26	6.60669e-25	23.0188
chr1	44894001	44895000	hyper	7.18605e-16	3.1469e-15	23.4942
chr1	44969001	44970000	hyper	7.80119e-24	5.41857e-23	27.7101
chr1	44979001	44980000	hyper	3.59841e-54	8.01205e-53	33.5703
chr1	45175001	45176000	hyper	2.79009e-18	1.42692e-17	23.3564
chr1	45243001	45244000	hyper	1.111e-28	9.69125e-28	25.0695
chr1	45331001	45332000	hyper	1.00673e-28	8.79931e-28	29.2333
chr1	45465001	45466000	hyper	4.50465e-49	8.50425e-48	28.4826
chr1	46056001	46057000	hyper	2.71052e-36	3.25533e-35	23.3391
chr1	46161001	46162000	hyper	8.35785e-106	6.85057e-104	35.9207
chr1	46180001	46181000	hyper	2.64538e-22	1.69649e-21	24.1174
chr1	46193001	46194000	hyper	3.06408e-49	5.82217e-48	34.2792
chr1	46194001	46195000	hyper	1.10456e-49	2.12875e-48	25.1826
chr1	46217001	46218000	hyper	2.66773e-23	1.80318e-22	22.0988
chr1	46224001	46225000	hyper	2.42456e-18	1.24457e-17	23.5466
chr1	46250001	46251000	hyper	4.77678e-31	4.6257e-30	30.2322
chr1	46255001	46256000	hyper	1.42858e-43	2.23066e-42	25.6145
chr1	46297001	46298000	hyper	8.78075e-70	3.04851e-68	42.3428
chr1	46440001	46441000	hyper	3.64189e-18	1.84929e-17	25.9091
chr1	46551001	46552000	hyper	3.37993e-13	1.22015e-12	20.2047
chr1	46561001	46562000	hyper	6.98779e-18	3.48627e-17	22.0105
chr1	46607001	46608000	hyper	4.04648e-43	6.22154e-42	22.4067
chr1	48288001	48289000	hyper	5.92304e-24	4.13779e-23	26.4719
chr1	49483001	49484000	hyper	1.03978e-22	6.81644e-22	26.3575
chr1	49914001	49915000	hypo	5.28504e-77	2.20861e-75	-20.3582
chr1	50383001	50384000	hypo	8.67755e-44	1.3655e-42	-38.4897
chr1	50551001	50552000	hypo	1.52616e-22	9.91589e-22	-23.6432
chr1	50731001	50732000	hyper	1.06004e-26	8.46118e-26	28.9452
chr1	50915001	50916000	hyper	2.47337e-37	3.09429e-36	33.8633
chr1	51132001	51133000	hypo	6.20783e-34	6.78362e-33	-24.9521
chr1	51483001	51484000	hyper	3.85827e-38	4.96807e-37	23.4804
chr1	51725001	51726000	hyper	8.08528e-19	4.2658e-18	20.0715
chr1	51743001	51744000	hyper	7.5284e-69	2.55042e-67	31.1338
chr1	51836001	51837000	hyper	1.38228e-31	1.3709e-30	26.9684
chr1	51870001	51871000	hyper	1.1714e-47	2.11146e-46	26.921
chr1	52248001	52249000	hyper	6.26767e-19	3.32914e-18	21.292
chr1	52297001	52298000	hyper	2.77097e-56	6.591e-55	34.2149
chr1	52338001	52339000	hyper	8.59597e-54	1.89549e-52	35.1333
chr1	52339001	52340000	hyper	3.98355e-32	4.04277e-31	26.8517
chr1	52399001	52400000	hyper	1.33152e-16	6.1211e-16	21.9836
chr1	52436001	52437000	hyper	2.59627e-59	6.74446e-58	29.3997
chr1	52623001	52624000	hypo	1.98001e-35	2.29977e-34	-21.7778
chr1	52625001	52626000	hyper	4.34472e-28	3.69286e-27	26.698
chr1	52642001	52643000	hyper	1.44912e-35	1.69169e-34	25.2372
chr1	52643001	52644000	hyper	1.24355e-29	1.13263e-28	21.1191
chr1	52660001	52661000	hyper	6.62193e-35	7.54196e-34	29.4908
chr1	52663001	52664000	hyper	2.23369e-34	2.48741e-33	24.5297
chr1	52703001	52704000	hyper	2.04035e-40	2.8526e-39	31.0739
chr1	52710001	52711000	hyper	9.63106e-26	7.33962e-25	20.1229
chr1	52723001	52724000	hypo	3.00212e-30	2.80866e-29	-29.5722
chr1	52736001	52737000	hypo	2.86018e-22	1.8309e-21	-28.563
chr1	52738001	52739000	hyper	3.64854e-26	2.83838e-25	22.5034
chr1	52765001	52766000	hyper	4.81591e-21	2.8847e-20	22.9449
chr1	52766001	52767000	hyper	1.97941e-22	1.27851e-21	23.17
chr1	52770001	52771000	hyper	2.49151e-36	2.99656e-35	32.9843
chr1	52771001	52772000	hyper	5.42713e-61	1.47591e-59	39.5618
chr1	52790001	52791000	hyper	1.49696e-21	9.22066e-21	22.2384
chr1	52791001	52792000	hyper	7.40507e-90	4.23199e-88	38.8323
chr1	53044001	53045000	hyper	1.37409e-34	1.54454e-33	26.5056
chr1	53082001	53083000	hyper	9.51803e-14	3.58577e-13	21.0043
chr1	53125001	53126000	hyper	1.18273e-54	2.67366e-53	31.4684
chr1	53222001	53223000	hyper	5.52392e-46	9.38901e-45	20.731
chr1	53495001	53496000	hyper	7.36066e-66	2.30515e-64	29.0334
chr1	53599001	53600000	hyper	1.37721e-36	1.67338e-35	30.1299
chr1	53613001	53614000	hyper	4.36215e-31	4.2324e-30	32.591
chr1	53616001	53617000	hyper	6.6201e-21	3.93396e-20	25.7689
chr1	54853001	54854000	hyper	9.72026e-14	3.65914e-13	21.4826
chr1	55140001	55141000	hyper	1.46069e-39	1.97937e-38	25.6328
chr1	55780001	55781000	hyper	2.71229e-38	3.51275e-37	32.4949
chr1	56052001	56053000	hyper	8.81495e-23	5.80058e-22	25.6249
chr1	56073001	56074000	hyper	5.40637e-30	5.0014e-29	26.1169
chr1	56149001	56150000	hyper	1.01462e-23	7.0056e-23	27.4557
chr1	56150001	56151000	hyper	5.19653e-26	4.01314e-25	29.2416
chr1	56494001	56495000	hyper	3.59286e-62	1.01575e-60	39.7424
chr1	56518001	56519000	hyper	1.1753e-30	1.11916e-29	30.4235
chr1	56567001	56568000	hyper	4.51444e-42	6.69701e-41	26.6467
chr1	56592001	56593000	hypo	1.1143e-21	6.91222e-21	-23.0173
chr1	56659001	56660000	hyper	8.01908e-65	2.43917e-63	25.1949
chr1	56674001	56675000	hyper	1.00691e-96	6.74425e-95	37.8058
chr1	56703001	56704000	hyper	1.65147e-19	9.07731e-19	25.2263
chr1	56825001	56826000	hyper	1.82372e-22	1.18005e-21	23.1853
chr1	56826001	56827000	hyper	1.31995e-21	8.15564e-21	23.4163
chr1	56851001	56852000	hyper	2.94996e-44	4.71879e-43	30.6187
chr1	56883001	56884000	hyper	3.94872e-33	4.17778e-32	21.3752
chr1	56900001	56901000	hyper	2.01547e-32	2.07175e-31	21.1567
chr1	56944001	56945000	hypo	8.12348e-44	1.27968e-42	-24.0444
chr1	57172001	57173000	hyper	9.43984e-19	4.96175e-18	21.7554
chr1	57237001	57238000	hyper	1.35831e-61	3.76645e-60	32.1435
chr1	57238001	57239000	hyper	4.41564e-31	4.28288e-30	32.0484
chr1	57303001	57304000	hyper	1.6304e-36	1.97512e-35	20.5227
chr1	57380001	57381000	hyper	3.4157e-25	2.53555e-24	25.416
chr1	57386001	57387000	hypo	4.73208e-47	8.35949e-46	-37.9411
chr1	57407001	57408000	hyper	1.12809e-31	1.12263e-30	24.7369
chr1	57412001	57413000	hyper	2.74683e-101	2.04744e-99	38.7718
chr1	57583001	57584000	hyper	2.04203e-22	1.3183e-21	20.3613
chr1	57595001	57596000	hypo	1.08232e-35	1.27017e-34	-30.8211
chr1	57596001	57597000	hypo	1.23877e-49	2.38456e-48	-34.9492
chr1	57598001	57599000	hypo	3.18819e-80	1.44702e-78	-36.8744
chr1	57646001	57647000	hyper	1.36147e-31	1.35075e-30	22.0711
chr1	57680001	57681000	hypo	1.22809e-53	2.69519e-52	-29.4656
chr1	57786001	57787000	hyper	1.01998e-39	1.38919e-38	29.0394
chr1	57820001	57821000	hyper	1.42119e-31	1.40838e-30	24.5725
chr1	57870001	57871000	hyper	8.40285e-45	1.37155e-43	36.4561
chr1	57925001	57926000	hyper	5.04046e-32	5.09537e-31	25.3981
chr1	57943001	57944000	hyper	5.52433e-34	6.05054e-33	22.6617
chr1	57945001	57946000	hyper	7.66373e-44	1.20826e-42	31.1398
chr1	57946001	57947000	hyper	1.17481e-39	1.59616e-38	31.5242
chr1	57947001	57948000	hyper	5.29943e-59	1.36608e-57	36.652
chr1	57950001	57951000	hyper	9.44283e-51	1.8888e-49	23.9933
chr1	57964001	57965000	hyper	4.07073e-28	3.46488e-27	20.4748
chr1	57980001	57981000	hyper	4.26814e-30	3.96665e-29	20.2764
chr1	57981001	57982000	hyper	2.5173e-29	2.2601e-28	26.129
chr1	57988001	57989000	hyper	4.6977e-120	5.15742e-118	35.369
chr1	57991001	57992000	hypo	2.45456e-31	2.40852e-30	-28.3771
chr1	57994001	57995000	hyper	4.21261e-37	5.22271e-36	26.9274
chr1	57997001	57998000	hyper	1.86496e-41	2.70977e-40	30.4413
chr1	57998001	57999000	hyper	4.57066e-53	9.85267e-52	31.3823
chr1	58001001	58002000	hyper	1.19297e-14	4.80174e-14	21.9302
chr1	58009001	58010000	hyper	2.47354e-58	6.25656e-57	20.2435
chr1	58223001	58224000	hyper	7.97937e-23	5.26453e-22	24.775
chr1	58238001	58239000	hyper	1.07649e-42	1.6325e-41	34.0055
chr1	58276001	58277000	hyper	5.19567e-35	5.9425e-34	33.4746
chr1	58299001	58300000	hyper	7.10288e-61	1.9265e-59	30.7126
chr1	58317001	58318000	hypo	3.7308e-57	9.10985e-56	-35.8691
chr1	58328001	58329000	hyper	4.89055e-36	5.81567e-35	20.7781
chr1	58362001	58363000	hyper	8.28693e-69	2.80458e-67	34.7751
chr1	58394001	58395000	hyper	3.44601e-61	9.4357e-60	22.7846
chr1	58404001	58405000	hyper	1.53219e-27	1.26934e-26	24.4427
chr1	58432001	58433000	hyper	1.56118e-62	4.45786e-61	23.7603
chr1	58455001	58456000	hyper	8.84651e-17	4.11333e-16	22.3004
chr1	58520001	58521000	hyper	1.73602e-57	4.28161e-56	25.1236
chr1	58529001	58530000	hyper	2.36325e-21	1.44014e-20	20.4394
chr1	58530001	58531000	hyper	1.06616e-40	1.50618e-39	25.5005
chr1	58551001	58552000	hyper	1.8955e-73	7.24574e-72	26.6965
chr1	58552001	58553000	hyper	9.44732e-41	1.3373e-39	25.9169
chr1	58574001	58575000	hyper	5.92648e-24	4.14013e-23	28.6743
chr1	58576001	58577000	hyper	6.13303e-38	7.84039e-37	33.9564
chr1	58577001	58578000	hyper	5.91038e-33	6.20808e-32	24.367
chr1	58730001	58731000	hypo	3.81559e-35	4.38437e-34	-36.1682
chr1	58791001	58792000	hyper	1.85559e-14	7.36546e-14	23.6731
chr1	58827001	58828000	hyper	1.31341e-31	1.30366e-30	26.6352
chr1	58878001	58879000	hyper	1.86018e-51	3.81372e-50	26.7744
chr1	58960001	58961000	hypo	3.60244e-28	3.07307e-27	-27.9472
chr1	59001001	59002000	hyper	2.13175e-61	5.87402e-60	39.0011
chr1	59002001	59003000	hyper	7.96069e-67	2.56192e-65	32.6403
chr1	59006001	59007000	hyper	3.98649e-37	4.94739e-36	27.7939
chr1	59010001	59011000	hyper	3.61872e-36	4.32668e-35	36.8975
chr1	59011001	59012000	hyper	5.62241e-22	3.53982e-21	22.3422
chr1	59012001	59013000	hyper	1.06891e-31	1.06487e-30	32.2116
chr1	59013001	59014000	hyper	1.99982e-81	9.36094e-80	30.4674
chr1	59019001	59020000	hyper	7.91511e-52	1.6409e-50	32.931
chr1	59021001	59022000	hyper	2.25958e-50	4.4598e-49	34.3976
chr1	59022001	59023000	hyper	5.16786e-22	3.2608e-21	20.5709
chr1	59048001	59049000	hyper	2.83589e-29	2.54001e-28	22.1242
chr1	59053001	59054000	hyper	1.54268e-23	1.05531e-22	26.0916
chr1	59055001	59056000	hyper	9.94705e-22	6.18501e-21	20.1169
chr1	59056001	59057000	hyper	4.31714e-65	1.32332e-63	36.2093
chr1	59099001	59100000	hyper	2.80599e-53	6.09084e-52	26.56
chr1	59100001	59101000	hyper	2.61434e-61	7.18444e-60	30.9326
chr1	59102001	59103000	hyper	1.15679e-68	3.89845e-67	42.5185
chr1	59104001	59105000	hyper	2.67411e-62	7.58599e-61	33.2553
chr1	59105001	59106000	hyper	6.20474e-53	1.3319e-51	36.5888
chr1	59108001	59109000	hyper	9.19413e-37	1.12479e-35	21.6143
chr1	59117001	59118000	hyper	1.87696e-30	1.77132e-29	21.3687
chr1	59232001	59233000	hyper	7.55037e-116	7.57026e-114	40.6516
chr1	59233001	59234000	hyper	4.31681e-51	8.73774e-50	35.5099
chr1	59279001	59280000	hyper	1.64195e-57	4.05301e-56	26.2726
chr1	59294001	59295000	hyper	7.65231e-50	1.48369e-48	22.5124
chr1	59320001	59321000	hyper	1.03992e-38	1.36718e-37	32.2577
chr1	59348001	59349000	hyper	2.76792e-42	4.13615e-41	32.3328
chr1	59425001	59426000	hyper	1.37828e-65	4.28522e-64	27.7464
chr1	59427001	59428000	hyper	3.44132e-38	4.44005e-37	22.5155
chr1	59431001	59432000	hyper	6.47136e-25	4.74062e-24	22.5072
chr1	59443001	59444000	hyper	1.6296e-18	8.44988e-18	26.2433
chr1	59512001	59513000	hyper	2.46224e-17	1.18651e-16	23.9985
chr1	59526001	59527000	hyper	3.90895e-51	7.92678e-50	37.5604
chr1	59747001	59748000	hyper	7.98097e-44	1.25748e-42	29.0284
chr1	59750001	59751000	hyper	5.3936e-19	2.87704e-18	20.139
chr1	60535001	60536000	hyper	1.22337e-16	5.63757e-16	20.3632
chr1	60752001	60753000	hyper	1.02799e-31	1.02478e-30	29.973
chr1	60843001	60844000	hyper	2.10012e-27	1.72928e-26	22.2031
chr1	61172001	61173000	hyper	1.15455e-13	4.3207e-13	20.9127
chr1	61451001	61452000	hyper	4.77399e-16	2.11463e-15	20.0825
chr1	61463001	61464000	hyper	1.24016e-24	8.96447e-24	25.2797
chr1	61990001	61991000	hyper	1.58587e-21	9.75589e-21	22.6069
chr1	62065001	62066000	hyper	1.33154e-25	1.00785e-24	29.7163
chr1	62359001	62360000	hyper	3.32138e-26	2.58878e-25	25.2134
chr1	62675001	62676000	hyper	1.803e-20	1.04619e-19	26.3303
chr1	63514001	63515000	hyper	4.04629e-29	3.59904e-28	28.112
chr1	63711001	63712000	hyper	1.28684e-26	1.02283e-25	32.2002
chr1	63734001	63735000	hypo	4.11502e-33	4.35069e-32	-24.6925
chr1	63869001	63870000	hyper	6.33697e-44	1.00178e-42	31.6695
chr1	63870001	63871000	hyper	6.41166e-34	7.00131e-33	26.2641
chr1	64029001	64030000	hyper	6.22929e-24	4.34724e-23	21.8153
chr1	64035001	64036000	hyper	1.41999e-61	3.93549e-60	31.7637
chr1	64090001	64091000	hypo	1.7048e-31	1.68393e-30	-22.787
chr1	64092001	64093000	hypo	2.31383e-46	3.98651e-45	-31.4701
chr1	64093001	64094000	hypo	1.41994e-43	2.21739e-42	-31.8854
chr1	64096001	64097000	hypo	2.60081e-90	1.50002e-88	-39.0375
chr1	64120001	64121000	hyper	6.42356e-62	1.7997e-60	37.8261
chr1	64137001	64138000	hyper	6.99455e-15	2.86213e-14	20.2954
chr1	64143001	64144000	hypo	3.57447e-38	4.60886e-37	-25.5287
chr1	64234001	64235000	hyper	1.76513e-30	1.66783e-29	24.5253
chr1	64239001	64240000	hyper	2.6776e-22	1.71655e-21	22.7823
chr1	64387001	64388000	hyper	4.59098e-48	8.38191e-47	20.2514
chr1	64765001	64766000	hyper	3.86465e-24	2.72622e-23	28.8046
chr1	64837001	64838000	hyper	5.56903e-38	7.12872e-37	28.693
chr1	64839001	64840000	hyper	1.38878e-17	6.80318e-17	22.3066
chr1	64857001	64858000	hyper	2.83784e-41	4.09451e-40	23.9925
chr1	64938001	64939000	hyper	2.16635e-29	1.95163e-28	25.4999
chr1	64944001	64945000	hyper	7.48843e-31	7.19355e-30	29.1479
chr1	65142001	65143000	hyper	5.3818e-62	1.51091e-60	29.3863
chr1	65156001	65157000	hyper	1.17334e-26	9.34518e-26	21.154
chr1	65163001	65164000	hyper	1.18305e-31	1.1762e-30	32.8103
chr1	65173001	65174000	hyper	1.32362e-17	6.49304e-17	21.1446
chr1	65339001	65340000	hyper	1.92441e-18	9.93798e-18	20.5193
chr1	66092001	66093000	hyper	9.83011e-42	1.44161e-40	23.7225
chr1	66145001	66146000	hypo	3.06497e-96	2.03246e-94	-35.8272
chr1	66367001	66368000	hyper	2.41532e-41	3.49419e-40	35.2743
chr1	66507001	66508000	hyper	7.26071e-58	1.8121e-56	43.1687
chr1	66516001	66517000	hyper	3.83509e-122	4.40989e-120	42.2539
chr1	66544001	66545000	hypo	3.28348e-49	6.22989e-48	-30.2576
chr1	66554001	66555000	hypo	1.41708e-31	1.40449e-30	-30.8442
chr1	66581001	66582000	hypo	1.39286e-14	5.579e-14	-22.6424
chr1	66591001	66592000	hypo	7.94258e-35	9.0171e-34	-28.6578
chr1	66746001	66747000	hyper	4.12851e-33	4.36474e-32	28.1673
chr1	66772001	66773000	hyper	2.6918e-13	9.792e-13	20.6599
chr1	66777001	66778000	hyper	1.35667e-22	8.83804e-22	22.5084
chr1	66815001	66816000	hypo	3.15544e-19	1.70619e-18	-21.9705
chr1	66862001	66863000	hyper	2.23138e-49	4.26205e-48	35.0664
chr1	66868001	66869000	hypo	1.2531e-26	9.96538e-26	-23.4709
chr1	66965001	66966000	hypo	1.22783e-24	8.8774e-24	-21.405
chr1	67008001	67009000	hypo	6.01074e-32	6.05449e-31	-29.8759
chr1	67011001	67012000	hypo	5.29169e-29	4.6827e-28	-23.799
chr1	67075001	67076000	hypo	3.82375e-12	1.26939e-11	-20.7872
chr1	67087001	67088000	hypo	3.67745e-66	1.16278e-64	-35.5333
chr1	67224001	67225000	hypo	9.28517e-27	7.43054e-26	-27.613
chr1	67231001	67232000	hyper	7.54283e-29	6.62789e-28	29.6815
chr1	67339001	67340000	hyper	6.77291e-33	7.09945e-32	25.6483
chr1	67373001	67374000	hyper	1.00536e-51	2.07658e-50	22.8239
chr1	67421001	67422000	hyper	1.05254e-118	1.12135e-116	34.4261
chr1	67422001	67423000	hyper	4.71195e-33	4.97056e-32	22.1326
chr1	67423001	67424000	hyper	8.3189e-28	6.97616e-27	21.2407
chr1	67426001	67427000	hyper	1.18729e-53	2.60683e-52	22.6652
chr1	67438001	67439000	hyper	1.77899e-53	3.88461e-52	39.032
chr1	67439001	67440000	hyper	2.34276e-76	9.61384e-75	25.2285
chr1	67658001	67659000	hyper	4.40815e-30	4.09373e-29	22.1854
chr1	67675001	67676000	hyper	2.70256e-33	2.87924e-32	26.8755
chr1	67694001	67695000	hyper	2.63977e-21	1.60453e-20	20.9194
chr1	67748001	67749000	hyper	2.56665e-69	8.80789e-68	33.9841
chr1	67749001	67750000	hyper	2.1224e-36	2.56021e-35	27.415
chr1	67756001	67757000	hyper	7.57528e-77	3.14982e-75	33.0384
chr1	67758001	67759000	hyper	1.50504e-20	8.77298e-20	24.051
chr1	67834001	67835000	hyper	2.17755e-68	7.28482e-67	34.2271
chr1	67858001	67859000	hyper	5.64528e-26	4.35083e-25	26.6553
chr1	67988001	67989000	hypo	9.05402e-27	7.25045e-26	-28.8934
chr1	67991001	67992000	hyper	4.95823e-27	4.01683e-26	21.7847
chr1	67997001	67998000	hypo	2.05143e-15	8.70687e-15	-22.4407
chr1	68008001	68009000	hypo	1.78939e-29	1.61818e-28	-24.9516
chr1	68009001	68010000	hypo	6.03279e-85	3.07916e-83	-36.0805
chr1	68029001	68030000	hyper	6.39284e-58	1.59822e-56	24.0191
chr1	68031001	68032000	hyper	2.71259e-32	2.77471e-31	21.2742
chr1	68041001	68042000	hyper	1.00753e-112	9.51539e-111	38.7374
chr1	68080001	68081000	hyper	1.19348e-19	6.613e-19	24.3736
chr1	68089001	68090000	hyper	1.83604e-31	1.81127e-30	20.2008
chr1	68091001	68092000	hyper	5.80209e-47	1.02193e-45	24.4964
chr1	68176001	68177000	hyper	3.37713e-59	8.7476e-58	32.2047
chr1	68177001	68178000	hyper	1.83204e-89	1.03863e-87	27.4036
chr1	68179001	68180000	hyper	1.81686e-46	3.1421e-45	30.5132
chr1	68184001	68185000	hyper	4.68955e-21	2.81077e-20	22.7692
chr1	68202001	68203000	hyper	1.52397e-50	3.02313e-49	22.9589
chr1	68412001	68413000	hyper	1.45974e-20	8.51477e-20	21.0585
chr1	68481001	68482000	hyper	7.1981e-41	1.02294e-39	27.6253
chr1	68513001	68514000	hyper	4.47018e-30	4.15081e-29	29.2688
chr1	68535001	68536000	hyper	1.43435e-36	1.74199e-35	29.842
chr1	68567001	68568000	hypo	4.23269e-31	4.1096e-30	-22.8522
chr1	68687001	68688000	hyper	2.33797e-27	1.92164e-26	22.8627
chr1	68796001	68797000	hyper	5.51168e-49	1.03791e-47	32.0202
chr1	68797001	68798000	hyper	6.71466e-42	9.90077e-41	27.2454
chr1	68866001	68867000	hyper	1.14481e-94	7.30798e-93	40.3457
chr1	68925001	68926000	hyper	1.04688e-32	1.08829e-31	26.523
chr1	68926001	68927000	hyper	5.85173e-19	3.11408e-18	22.2053
chr1	68934001	68935000	hyper	5.60157e-37	6.91349e-36	24.3624
chr1	68962001	68963000	hyper	8.33464e-21	4.92662e-20	20.2609
chr1	69052001	69053000	hyper	5.81634e-23	3.86367e-22	22.7316
chr1	69062001	69063000	hypo	9.49606e-19	4.99041e-18	-21.2155
chr1	69120001	69121000	hyper	9.47955e-28	7.92933e-27	20.4622
chr1	69193001	69194000	hyper	4.00627e-36	4.78107e-35	20.4221
chr1	69195001	69196000	hyper	9.16691e-29	8.02704e-28	21.8261
chr1	69203001	69204000	hyper	3.72168e-40	5.15275e-39	20.0441
chr1	69204001	69205000	hyper	3.19016e-60	8.49678e-59	38.2693
chr1	69223001	69224000	hypo	9.38436e-43	1.42614e-41	-22.6986
chr1	69238001	69239000	hypo	6.07301e-26	4.67375e-25	-26.5891
chr1	69271001	69272000	hyper	6.25761e-54	1.38542e-52	21.3146
chr1	69319001	69320000	hyper	6.09185e-24	4.25342e-23	21.9539
chr1	69475001	69476000	hyper	2.69248e-24	1.9136e-23	25.8657
chr1	69492001	69493000	hypo	1.8278e-66	5.82043e-65	-23.0152
chr1	69497001	69498000	hypo	2.60333e-63	7.60094e-62	-27.6973
chr1	69508001	69509000	hyper	7.18231e-107	6.02762e-105	38.5615
chr1	69546001	69547000	hypo	7.20319e-46	1.2198e-44	-31.0568
chr1	69569001	69570000	hyper	8.73114e-48	1.58035e-46	27.572
chr1	69571001	69572000	hypo	2.49959e-29	2.24457e-28	-22.138
chr1	69636001	69637000	hypo	3.39741e-30	3.17085e-29	-26.3052
chr1	69637001	69638000	hypo	1.63599e-24	1.17553e-23	-21.738
chr1	69726001	69727000	hyper	7.95939e-27	6.38889e-26	20.3836
chr1	70122001	70123000	hyper	2.45715e-29	2.20718e-28	28.5679
chr1	70431001	70432000	hyper	1.12256e-56	2.70112e-55	35.153
chr1	70460001	70461000	hyper	2.31366e-30	2.17489e-29	21.5734
chr1	70461001	70462000	hyper	4.09011e-24	2.88124e-23	20.9203
chr1	70492001	70493000	hyper	2.04414e-34	2.2799e-33	27.7724
chr1	70493001	70494000	hyper	8.09036e-23	5.33544e-22	23.364
chr1	70498001	70499000	hyper	7.00784e-26	5.37727e-25	22.1486
chr1	70523001	70524000	hyper	2.99343e-35	3.45484e-34	32.5469
chr1	70524001	70525000	hyper	7.59714e-82	3.59792e-80	34.5015
chr1	70555001	70556000	hyper	2.54e-46	4.36794e-45	27.8804
chr1	70566001	70567000	hyper	6.87068e-51	1.3816e-49	26.8767
chr1	70607001	70608000	hyper	1.98154e-72	7.36128e-71	27.5223
chr1	70610001	70611000	hyper	4.85174e-52	1.01305e-50	25.0141
chr1	70612001	70613000	hyper	3.01381e-78	1.29991e-76	24.851
chr1	70613001	70614000	hyper	3.57301e-116	3.60795e-114	31.339
chr1	70614001	70615000	hyper	4.41093e-159	9.93091e-157	30.4772
chr1	70617001	70618000	hyper	3.46961e-111	3.17574e-109	34.0847
chr1	70619001	70620000	hyper	3.65259e-101	2.71704e-99	29.3787
chr1	70638001	70639000	hyper	1.89093e-54	4.25033e-53	29.0755
chr1	70643001	70644000	hyper	1.15107e-38	1.51068e-37	27.9546
chr1	70724001	70725000	hyper	1.3623e-24	9.82891e-24	20.4667
chr1	70740001	70741000	hyper	1.27049e-60	3.42204e-59	21.3929
chr1	70747001	70748000	hyper	5.10483e-35	5.83982e-34	31.8208
chr1	70752001	70753000	hypo	1.39155e-88	7.72066e-87	-40.1272
chr1	70776001	70777000	hypo	4.65073e-36	5.53559e-35	-20.0067
chr1	70782001	70783000	hypo	1.45082e-27	1.20305e-26	-21.3784
chr1	70831001	70832000	hypo	4.90276e-19	2.62232e-18	-24.0506
chr1	71012001	71013000	hypo	5.01585e-70	1.75235e-68	-35.9139
chr1	71013001	71014000	hypo	3.75609e-21	2.26352e-20	-20.5853
chr1	71139001	71140000	hypo	7.98471e-148	1.49184e-145	-48.8845
chr1	71146001	71147000	hypo	4.30457e-48	7.86458e-47	-41.3456
chr1	71154001	71155000	hypo	1.48239e-48	2.75059e-47	-34.9401
chr1	71156001	71157000	hypo	2.65203e-141	4.41255e-139	-29.7239
chr1	71204001	71205000	hypo	6.09908e-109	5.33674e-107	-47.0501
chr1	71205001	71206000	hypo	6.93177e-33	7.26199e-32	-25.18
chr1	71225001	71226000	hyper	3.12167e-30	2.91827e-29	23.8989
chr1	71354001	71355000	hyper	5.8708e-25	4.30908e-24	22.2511
chr1	71476001	71477000	hyper	8.88741e-100	6.39343e-98	29.7532
chr1	71780001	71781000	hyper	1.84492e-62	5.25578e-61	24.7487
chr1	71839001	71840000	hyper	8.42621e-27	6.75668e-26	26.4413
chr1	71840001	71841000	hyper	3.75067e-33	3.97217e-32	27.1257
chr1	71842001	71843000	hyper	3.05026e-30	2.85266e-29	30.2748
chr1	71929001	71930000	hyper	1.52328e-25	1.14949e-24	24.535
chr1	71975001	71976000	hypo	6.20764e-104	4.89099e-102	-31.887
chr1	71977001	71978000	hyper	2.91857e-32	2.97993e-31	20.1819
chr1	72001001	72002000	hyper	3.87668e-32	3.93604e-31	27.1194
chr1	72068001	72069000	hyper	9.12763e-21	5.38305e-20	23.7717
chr1	72285001	72286000	hypo	5.35928e-40	7.37495e-39	-30.0195
chr1	72329001	72330000	hyper	3.2906e-83	1.61282e-81	27.2263
chr1	72344001	72345000	hypo	5.5234e-120	6.05031e-118	-40.3547
chr1	72350001	72351000	hyper	2.21186e-163	5.36482e-161	40.7685
chr1	72356001	72357000	hyper	6.73607e-54	1.49e-52	24.4067
chr1	72358001	72359000	hyper	1.41243e-64	4.26931e-63	34.1784
chr1	72366001	72367000	hypo	1.13919e-40	1.6079e-39	-21.5887
chr1	72382001	72383000	hyper	2.26852e-78	9.81535e-77	30.6355
chr1	72398001	72399000	hypo	4.62078e-100	3.34657e-98	-34.1006
chr1	72399001	72400000	hypo	8.22115e-41	1.1661e-39	-28.9418
chr1	72417001	72418000	hyper	5.33831e-37	6.59117e-36	26.5494
chr1	72418001	72419000	hypo	1.11597e-25	8.48056e-25	-21.146
chr1	72455001	72456000	hyper	2.6035e-31	2.55199e-30	28.4884
chr1	72456001	72457000	hyper	4.25069e-55	9.74342e-54	21.2313
chr1	72457001	72458000	hyper	2.92414e-33	3.11062e-32	24.1029
chr1	72475001	72476000	hyper	7.74786e-84	3.84855e-82	33.4293
chr1	72512001	72513000	hypo	1.07911e-23	7.44152e-23	-22.4432
chr1	72599001	72600000	hyper	6.76641e-62	1.89515e-60	36.1383
chr1	72636001	72637000	hyper	1.41844e-24	1.02237e-23	26.0388
chr1	72641001	72642000	hyper	8.55534e-39	1.12821e-37	21.7863
chr1	72675001	72676000	hypo	1.2137e-23	8.34493e-23	-21.8909
chr1	72700001	72701000	hyper	1.56683e-65	4.86144e-64	31.3231
chr1	72714001	72715000	hyper	3.30888e-40	4.58933e-39	24.6384
chr1	72715001	72716000	hyper	7.27483e-40	9.95793e-39	31.6653
chr1	72721001	72722000	hyper	3.02073e-95	1.95703e-93	40.1555
chr1	72738001	72739000	hypo	1.31362e-24	9.48488e-24	-21.0949
chr1	72784001	72785000	hyper	6.23927e-32	6.28079e-31	24.9736
chr1	72794001	72795000	hyper	1.4632e-94	9.32422e-93	35.852
chr1	72803001	72804000	hyper	6.06719e-19	3.22542e-18	21.5714
chr1	72815001	72816000	hyper	4.6868e-56	1.10796e-54	26.043
chr1	72862001	72863000	hyper	9.5689e-223	5.94509e-220	20.8603
chr1	72884001	72885000	hypo	1.03354e-134	1.52191e-132	-40.2385
chr1	72891001	72892000	hypo	4.17062e-28	3.54749e-27	-23.0156
chr1	72901001	72902000	hypo	5.4732e-66	1.7192e-64	-44.1176
chr1	72939001	72940000	hypo	5.84434e-30	5.40066e-29	-21.0097
chr1	72941001	72942000	hyper	1.45127e-25	1.09648e-24	23.3304
chr1	72945001	72946000	hypo	1.33832e-23	9.18389e-23	-24.201
chr1	72969001	72970000	hyper	1.3037e-41	1.90327e-40	28.344
chr1	73046001	73047000	hypo	2.10311e-49	4.02107e-48	-22.9084
chr1	73049001	73050000	hyper	2.76764e-45	4.59134e-44	20.6636
chr1	73166001	73167000	hyper	2.46757e-67	8.04312e-66	23.4384
chr1	73199001	73200000	hypo	1.48793e-47	2.67258e-46	-21.327
chr1	73202001	73203000	hyper	1.24012e-30	1.17973e-29	21.8091
chr1	73207001	73208000	hyper	6.67671e-77	2.78225e-75	39.0036
chr1	73212001	73213000	hyper	5.70256e-59	1.4687e-57	29.3496
chr1	73215001	73216000	hypo	2.90098e-46	4.97818e-45	-28.2793
chr1	73226001	73227000	hyper	3.21837e-158	7.15427e-156	29.4494
chr1	73227001	73228000	hyper	5.95644e-28	5.03132e-27	25.186
chr1	73251001	73252000	hyper	1.44327e-54	3.25493e-53	20.546
chr1	73252001	73253000	hyper	5.39684e-43	8.26693e-42	24.0441
chr1	73267001	73268000	hypo	1.60432e-70	5.68217e-69	-30.2173
chr1	73271001	73272000	hyper	3.26994e-72	1.20934e-70	22.3708
chr1	73306001	73307000	hyper	9.27881e-43	1.4102e-41	29.623
chr1	73334001	73335000	hyper	1.44207e-32	1.49054e-31	21.3703
chr1	73356001	73357000	hypo	5.04172e-20	2.85356e-19	-20.5956
chr1	73370001	73371000	hyper	2.61769e-61	7.19318e-60	34.3761
chr1	73402001	73403000	hyper	2.35422e-87	1.27165e-85	34.8678
chr1	73403001	73404000	hyper	2.33911e-81	1.09328e-79	33.0901
chr1	73404001	73405000	hyper	2.02527e-21	1.23868e-20	20.2078
chr1	73430001	73431000	hyper	3.86303e-49	7.31307e-48	25.3929
chr1	73480001	73481000	hyper	4.03376e-25	2.98532e-24	27.5893
chr1	73482001	73483000	hypo	4.17937e-22	2.65014e-21	-24.5633
chr1	73492001	73493000	hyper	4.91261e-44	7.79357e-43	25.5229
chr1	73514001	73515000	hyper	6.09147e-26	4.6878e-25	27.5359
chr1	73515001	73516000	hyper	1.40905e-28	1.2236e-27	25.1603
chr1	73592001	73593000	hyper	2.16663e-54	4.86132e-53	30.6319
chr1	73595001	73596000	hypo	9.12786e-17	4.24047e-16	-21.5077
chr1	73604001	73605000	hyper	4.31253e-25	3.18664e-24	20.4004
chr1	73626001	73627000	hyper	4.95136e-116	4.98374e-114	24.2469
chr1	73627001	73628000	hyper	2.81359e-105	2.2836e-103	35.8807
chr1	73642001	73643000	hyper	1.0078e-58	2.57747e-57	32.9488
chr1	73660001	73661000	hyper	4.23768e-25	3.13265e-24	21.0742
chr1	73678001	73679000	hyper	5.39241e-131	7.38123e-129	37.8519
chr1	73704001	73705000	hyper	8.7248e-41	1.23642e-39	29.7484
chr1	73707001	73708000	hyper	1.09987e-46	1.91662e-45	30.0631
chr1	73708001	73709000	hyper	5.394e-26	4.16236e-25	23.0399
chr1	73747001	73748000	hyper	2.20342e-38	2.86138e-37	32.5126
chr1	73748001	73749000	hyper	1.0812e-107	9.24147e-106	29.4325
chr1	73749001	73750000	hyper	3.34527e-31	3.26415e-30	26.4012
chr1	73751001	73752000	hyper	5.05765e-86	2.64885e-84	37.6898
chr1	73758001	73759000	hyper	3.86668e-33	4.09256e-32	21.0359
chr1	73763001	73764000	hyper	3.81632e-35	4.38509e-34	24.5861
chr1	73802001	73803000	hypo	1.60062e-32	1.65128e-31	-31.1318
chr1	73885001	73886000	hyper	2.51109e-27	2.06092e-26	28.8516
chr1	73886001	73887000	hyper	5.8988e-54	1.30684e-52	34.9565
chr1	73887001	73888000	hyper	2.30028e-32	2.359e-31	22.7996
chr1	73891001	73892000	hyper	1.19343e-27	9.93159e-27	27.8377
chr1	73893001	73894000	hyper	3.5359e-158	7.85613e-156	41.1432
chr1	73895001	73896000	hyper	8.74567e-45	1.42661e-43	23.4872
chr1	73899001	73900000	hyper	7.72159e-39	1.02004e-37	31.793
chr1	74017001	74018000	hyper	2.57545e-40	3.58805e-39	27.5063
chr1	74021001	74022000	hyper	4.89675e-80	2.21106e-78	41.6198
chr1	74041001	74042000	hyper	1.39265e-29	1.26541e-28	30.2834
chr1	74124001	74125000	hypo	6.66492e-24	4.64424e-23	-21.3822
chr1	74417001	74418000	hyper	6.33195e-67	2.0439e-65	28.6728
chr1	74446001	74447000	hypo	4.85122e-61	1.3215e-59	-40.1186
chr1	74515001	74516000	hyper	1.99202e-37	2.50143e-36	31.17
chr1	74547001	74548000	hyper	4.56105e-26	3.53188e-25	24.8936
chr1	74553001	74554000	hyper	5.61809e-18	2.81937e-17	23.2815
chr1	74700001	74701000	hyper	9.04763e-20	5.04789e-19	26.8806
chr1	74824001	74825000	hyper	1.12318e-22	7.35054e-22	24.4689
chr1	74833001	74834000	hypo	1.37543e-33	1.48101e-32	-26.7811
chr1	75631001	75632000	hypo	3.77257e-21	2.27308e-20	-23.6711
chr1	75792001	75793000	hypo	5.16271e-17	2.43744e-16	-22.3341
chr1	75949001	75950000	hyper	2.31801e-30	2.17875e-29	23.067
chr1	76000001	76001000	hypo	1.43101e-21	8.82434e-21	-23.3093
chr1	76049001	76050000	hypo	1.81215e-14	7.19894e-14	-21.5586
chr1	76245001	76246000	hyper	5.1842e-22	3.27073e-21	26.7662
chr1	76282001	76283000	hyper	7.29818e-56	1.71421e-54	24.0184
chr1	76340001	76341000	hyper	4.23169e-31	4.10873e-30	30.9295
chr1	76427001	76428000	hyper	3.05424e-93	1.88743e-91	36.7148
chr1	77010001	77011000	hyper	5.87929e-23	3.9043e-22	20.09
chr1	77042001	77043000	hyper	7.43032e-15	3.03434e-14	20.7619
chr1	77157001	77158000	hyper	1.7543e-30	1.65788e-29	32.4893
chr1	77175001	77176000	hyper	8.89983e-19	4.68397e-18	27.9193
chr1	77310001	77311000	hyper	1.86169e-22	1.20405e-21	21.3536
chr1	77311001	77312000	hyper	2.09315e-15	8.87801e-15	21.1343
chr1	78044001	78045000	hyper	4.38117e-73	1.65786e-71	34.3491
chr1	78141001	78142000	hypo	1.0956e-28	9.55994e-28	-22.2081
chr1	78219001	78220000	hyper	1.22605e-13	4.57817e-13	20.2931
chr1	78344001	78345000	hyper	6.25802e-58	1.56487e-56	31.8288
chr1	78362001	78363000	hypo	1.44805e-15	6.20849e-15	-21.8194
chr1	78384001	78385000	hyper	5.88907e-20	3.32135e-19	21.4438
chr1	78420001	78421000	hyper	2.83697e-70	9.98037e-69	25.7392
chr1	78475001	78476000	hyper	2.88213e-48	5.29568e-47	29.9626
chr1	78556001	78557000	hyper	1.03363e-17	5.10323e-17	22.202
chr1	78572001	78573000	hyper	1.41418e-43	2.20874e-42	27.7674
chr1	78706001	78707000	hyper	5.91412e-23	3.92678e-22	20.1216
chr1	78712001	78713000	hyper	1.01491e-24	7.36549e-24	27.3554
chr1	78803001	78804000	hyper	1.24693e-22	8.14104e-22	26.3752
chr1	78896001	78897000	hyper	3.45251e-41	4.9662e-40	33.0679
chr1	78897001	78898000	hyper	1.16153e-42	1.75902e-41	39.6993
chr1	78951001	78952000	hypo	5.79916e-61	1.5762e-59	-34.2363
chr1	78989001	78990000	hyper	1.10993e-27	9.25057e-27	23.1742
chr1	78990001	78991000	hyper	6.42992e-23	4.26152e-22	21.5176
chr1	79016001	79017000	hyper	1.0071e-33	1.09061e-32	22.5695
chr1	79029001	79030000	hyper	9.12586e-46	1.53945e-44	37.7541
chr1	79068001	79069000	hyper	9.4981e-32	9.48048e-31	22.7566
chr1	79087001	79088000	hyper	4.55071e-20	2.5814e-19	20.687
chr1	79140001	79141000	hyper	6.05995e-20	3.415e-19	21.7885
chr1	79144001	79145000	hyper	9.00232e-49	1.68276e-47	21.6143
chr1	79161001	79162000	hyper	4.28039e-21	2.57171e-20	22.6551
chr1	79185001	79186000	hyper	3.52184e-63	1.02409e-61	26.4183
chr1	79287001	79288000	hyper	1.19751e-48	2.22989e-47	31.0131
chr1	79288001	79289000	hyper	7.69612e-28	6.46624e-27	22.9952
chr1	79291001	79292000	hyper	2.90327e-131	4.00149e-129	42.5464
chr1	79292001	79293000	hyper	8.69695e-41	1.23259e-39	23.2544
chr1	79298001	79299000	hyper	1.47254e-50	2.92268e-49	25.2999
chr1	79302001	79303000	hyper	1.81262e-88	1.00416e-86	32.8115
chr1	79308001	79309000	hyper	1.24218e-39	1.68639e-38	26.4742
chr1	79312001	79313000	hyper	3.45113e-41	4.96438e-40	29.6471
chr1	79331001	79332000	hyper	7.17701e-73	2.6977e-71	30.2099
chr1	79340001	79341000	hyper	9.42025e-50	1.81933e-48	24.6354
chr1	79341001	79342000	hypo	1.21867e-18	6.36513e-18	-20.1619
chr1	79346001	79347000	hyper	7.53432e-73	2.83031e-71	31.4427
chr1	79370001	79371000	hypo	2.93315e-31	2.86929e-30	-28.761
chr1	79372001	79373000	hypo	5.40004e-32	5.45259e-31	-23.5083
chr1	79376001	79377000	hypo	2.60707e-120	2.8773e-118	-53.8077
chr1	79382001	79383000	hypo	9.15498e-52	1.89374e-50	-26.8925
chr1	79384001	79385000	hypo	1.08873e-41	1.59442e-40	-30.5546
chr1	79386001	79387000	hypo	4.35917e-134	6.34245e-132	-40.0525
chr1	79388001	79389000	hypo	1.97507e-57	4.86517e-56	-28.7594
chr1	79426001	79427000	hyper	3.76292e-17	1.79162e-16	22.2784
chr1	79442001	79443000	hyper	4.01585e-20	2.28531e-19	21.1538
chr1	79448001	79449000	hyper	1.2801e-44	2.07487e-43	23.3489
chr1	79458001	79459000	hyper	1.13476e-28	9.89394e-28	26.4346
chr1	79465001	79466000	hyper	2.14826e-36	2.59069e-35	26.4815
chr1	79511001	79512000	hyper	3.97863e-34	4.3843e-33	27.9523
chr1	79519001	79520000	hyper	1.85312e-44	2.98439e-43	30.5635
chr1	79520001	79521000	hyper	7.78243e-61	2.10795e-59	33.8568
chr1	79528001	79529000	hyper	2.98173e-33	3.1712e-32	29.6732
chr1	79582001	79583000	hyper	1.72067e-101	1.28736e-99	47.3114
chr1	79585001	79586000	hyper	9.03348e-60	2.37618e-58	30.2769
chr1	79596001	79597000	hyper	7.83415e-24	5.4406e-23	22.2153
chr1	79598001	79599000	hyper	8.29829e-60	2.18463e-58	21.8659
chr1	79612001	79613000	hyper	2.7604e-70	9.71646e-69	28.9425
chr1	79627001	79628000	hyper	6.36773e-78	2.72219e-76	42.3891
chr1	79631001	79632000	hyper	2.06801e-28	1.78216e-27	21.4538
chr1	79702001	79703000	hyper	9.13868e-22	5.69334e-21	23.3567
chr1	79942001	79943000	hyper	7.37583e-14	2.80032e-13	22.9829
chr1	80006001	80007000	hyper	1.02813e-47	1.8568e-46	24.9357
chr1	80023001	80024000	hyper	2.88628e-37	3.60204e-36	24.2927
chr1	80034001	80035000	hyper	4.3948e-72	1.62058e-70	39.7669
chr1	80124001	80125000	hyper	1.93114e-57	4.75802e-56	31.5
chr1	80218001	80219000	hyper	5.32112e-56	1.25561e-54	34.3071
chr1	80241001	80242000	hyper	4.88641e-38	6.26825e-37	29.3646
chr1	80248001	80249000	hyper	2.371e-34	2.6373e-33	30.7558
chr1	80261001	80262000	hyper	1.50556e-44	2.43321e-43	29.2133
chr1	80302001	80303000	hyper	1.63591e-46	2.83351e-45	40.3157
chr1	80344001	80345000	hyper	4.07212e-188	1.47582e-185	44.5228
chr1	80360001	80361000	hyper	4.82951e-33	5.09201e-32	28.3877
chr1	80375001	80376000	hyper	2.22494e-31	2.18717e-30	24.0421
chr1	80384001	80385000	hyper	4.34399e-46	7.40814e-45	28.8507
chr1	80396001	80397000	hyper	2.87568e-33	3.06041e-32	29.7014
chr1	80400001	80401000	hyper	2.35268e-26	1.84659e-25	23.5496
chr1	80432001	80433000	hyper	2.75549e-27	2.25746e-26	26.6457
chr1	80468001	80469000	hyper	6.939e-59	1.78328e-57	26.2169
chr1	80469001	80470000	hyper	1.0982e-63	3.23599e-62	31.8746
chr1	80470001	80471000	hyper	5.18203e-33	5.45688e-32	27.2616
chr1	80471001	80472000	hyper	6.2428e-26	4.80148e-25	24.5163
chr1	80491001	80492000	hyper	6.37634e-48	1.16001e-46	30.285
chr1	80527001	80528000	hyper	1.76378e-27	1.45758e-26	25.6424
chr1	80532001	80533000	hyper	2.10614e-38	2.73651e-37	25.1794
chr1	80603001	80604000	hyper	1.98399e-24	1.41974e-23	22.4593
chr1	80690001	80691000	hypo	2.92832e-28	2.50736e-27	-25.8408
chr1	80719001	80720000	hypo	7.78697e-25	5.68239e-24	-20.5653
chr1	80730001	80731000	hyper	2.10814e-71	7.63277e-70	26.2783
chr1	80772001	80773000	hyper	3.69152e-29	3.29008e-28	24.6743
chr1	80788001	80789000	hypo	2.98823e-25	2.22477e-24	-23.7703
chr1	80920001	80921000	hyper	1.10418e-17	5.44257e-17	22.0442
chr1	80947001	80948000	hyper	3.2098e-20	1.83631e-19	21.9965
chr1	80949001	80950000	hyper	1.41465e-45	2.36999e-44	25.5331
chr1	81026001	81027000	hyper	1.11116e-71	4.05317e-70	38.3563
chr1	81027001	81028000	hyper	5.00476e-95	3.22482e-93	41.6968
chr1	81030001	81031000	hyper	1.42075e-33	1.52909e-32	26.9339
chr1	81039001	81040000	hyper	2.75554e-52	5.79462e-51	30.8513
chr1	81047001	81048000	hyper	3.95145e-71	1.42025e-69	34.1424
chr1	81069001	81070000	hyper	7.95186e-72	2.91316e-70	36.0408
chr1	81075001	81076000	hyper	2.00089e-37	2.51243e-36	27.6364
chr1	81094001	81095000	hypo	1.66247e-26	1.31396e-25	-22.8362
chr1	81096001	81097000	hyper	1.10938e-38	1.4568e-37	27.6269
chr1	81097001	81098000	hyper	2.11265e-59	5.50506e-58	25.0562
chr1	81104001	81105000	hyper	6.58039e-75	2.60966e-73	40.373
chr1	81120001	81121000	hyper	1.51466e-40	2.12807e-39	28.441
chr1	81128001	81129000	hyper	3.31433e-62	9.37794e-61	29.1361
chr1	81140001	81141000	hyper	1.33174e-21	8.22604e-21	20.0455
chr1	81148001	81149000	hypo	8.32959e-41	1.18121e-39	-27.4408
chr1	81149001	81150000	hypo	6.59445e-31	6.35089e-30	-27.5799
chr1	81500001	81501000	hyper	5.82808e-48	1.0611e-46	23.0825
chr1	81505001	81506000	hyper	1.87845e-44	3.0245e-43	26.2043
chr1	81559001	81560000	hyper	2.71328e-45	4.50236e-44	20.5748
chr1	81586001	81587000	hypo	1.01236e-31	1.00945e-30	-22.9772
chr1	81633001	81634000	hyper	3.39709e-31	3.31406e-30	21.3319
chr1	81636001	81637000	hyper	3.52571e-50	6.91283e-49	32.1117
chr1	81755001	81756000	hyper	1.12465e-63	3.31258e-62	34.361
chr1	81807001	81808000	hyper	6.51664e-26	5.00771e-25	25.977
chr1	81865001	81866000	hyper	8.15783e-44	1.285e-42	28.0226
chr1	81873001	81874000	hyper	5.87349e-39	7.79043e-38	35.3274
chr1	81940001	81941000	hypo	1.38423e-36	1.68173e-35	-34.0481
chr1	82116001	82117000	hypo	1.3747e-87	7.45943e-86	-23.3036
chr1	82120001	82121000	hyper	5.20863e-46	8.86032e-45	21.1535
chr1	82125001	82126000	hyper	1.49571e-30	1.41762e-29	20.5738
chr1	82246001	82247000	hyper	2.91439e-25	2.17094e-24	20.6717
chr1	82334001	82335000	hyper	5.32545e-28	4.50865e-27	29.4014
chr1	82440001	82441000	hyper	4.33596e-86	2.27631e-84	21.6181
chr1	82512001	82513000	hyper	1.1148e-96	7.45783e-95	39.5194
chr1	82523001	82524000	hyper	6.90533e-43	1.05425e-41	23.5609
chr1	82526001	82527000	hyper	7.55046e-39	9.97765e-38	31.2764
chr1	82534001	82535000	hyper	2.05483e-46	3.54778e-45	30.6079
chr1	82546001	82547000	hyper	3.98943e-44	6.35056e-43	26.9732
chr1	82558001	82559000	hypo	8.40621e-48	1.52223e-46	-20.9729
chr1	82573001	82574000	hyper	2.13794e-39	2.87916e-38	28.9823
chr1	82589001	82590000	hyper	2.92047e-46	5.01125e-45	27.521
chr1	82591001	82592000	hyper	4.84547e-104	3.82666e-102	37.8799
chr1	82595001	82596000	hyper	1.4629e-38	1.91234e-37	26.0154
chr1	82599001	82600000	hyper	7.71196e-38	9.82655e-37	20.0556
chr1	82609001	82610000	hypo	8.05225e-160	1.83644e-157	-25.3183
chr1	82614001	82615000	hyper	5.36987e-49	1.01142e-47	28.4079
chr1	82625001	82626000	hyper	4.83433e-52	1.00951e-50	23.5654
chr1	82626001	82627000	hyper	7.43877e-38	9.48562e-37	21.4687
chr1	82627001	82628000	hyper	7.0875e-132	9.84883e-130	38.038
chr1	82628001	82629000	hyper	3.70459e-52	7.76437e-51	30.8037
chr1	82629001	82630000	hyper	7.59615e-75	3.00734e-73	36.3225
chr1	82634001	82635000	hyper	3.69951e-119	3.97414e-117	39.6255
chr1	82636001	82637000	hyper	1.23047e-54	2.78086e-53	23.9727
chr1	82637001	82638000	hyper	1.92837e-51	3.95131e-50	25.1703
chr1	82642001	82643000	hyper	6.74725e-37	8.29951e-36	24.7576
chr1	82643001	82644000	hyper	7.18018e-73	2.69866e-71	29.5805
chr1	82644001	82645000	hyper	2.98592e-50	5.86915e-49	30.6958
chr1	82717001	82718000	hyper	1.15284e-26	9.18501e-26	23.9306
chr1	82752001	82753000	hyper	1.39644e-25	1.05588e-24	24.1932
chr1	82758001	82759000	hyper	5.58094e-51	1.12529e-49	30.7265
chr1	82796001	82797000	hyper	6.94047e-21	4.11977e-20	23.9881
chr1	82797001	82798000	hyper	1.34687e-36	1.63698e-35	31.0594
chr1	82854001	82855000	hyper	4.24365e-50	8.29715e-49	22.128
chr1	82868001	82869000	hyper	9.89718e-24	6.83711e-23	24.2576
chr1	82869001	82870000	hyper	1.49776e-28	1.29888e-27	24.1245
chr1	82870001	82871000	hyper	4.75628e-57	1.15816e-55	35.4574
chr1	82977001	82978000	hyper	6.48314e-30	5.97939e-29	22.5566
chr1	83132001	83133000	hyper	9.44863e-33	9.84241e-32	26.119
chr1	83183001	83184000	hyper	4.85319e-21	2.90647e-20	25.1893
chr1	83213001	83214000	hyper	2.65752e-27	2.17834e-26	25.2772
chr1	83215001	83216000	hyper	1.90246e-39	2.56764e-38	30.8188
chr1	83238001	83239000	hyper	8.05208e-37	9.87245e-36	26.764
chr1	83262001	83263000	hypo	5.48983e-55	1.25425e-53	-39.2592
chr1	83298001	83299000	hypo	4.66594e-92	2.80604e-90	-36.8956
chr1	83323001	83324000	hyper	1.33678e-35	1.56287e-34	22.0699
chr1	83459001	83460000	hyper	4.54079e-47	8.02834e-46	29.7655
chr1	83540001	83541000	hyper	4.66889e-26	3.61399e-25	28.7049
chr1	83545001	83546000	hypo	4.84069e-171	1.34151e-168	-41.5807
chr1	83675001	83676000	hypo	1.91424e-19	1.0483e-18	-23.2021
chr1	83783001	83784000	hypo	1.7554e-41	2.55261e-40	-33.3367
chr1	83816001	83817000	hypo	5.84061e-28	4.93509e-27	-31.7077
chr1	83833001	83834000	hypo	6.11643e-24	4.27017e-23	-21.222
chr1	83922001	83923000	hypo	3.34149e-46	5.72182e-45	-37.0823
chr1	83955001	83956000	hyper	1.49023e-39	2.0191e-38	20.8189
chr1	83979001	83980000	hyper	1.33005e-28	1.15643e-27	24.2556
chr1	84048001	84049000	hyper	4.2123e-60	1.11805e-58	21.1837
chr1	84051001	84052000	hyper	1.37695e-28	1.19628e-27	28.03
chr1	84120001	84121000	hyper	6.92679e-28	5.83358e-27	22.8209
chr1	84277001	84278000	hyper	7.10561e-20	3.98988e-19	23.2558
chr1	84389001	84390000	hyper	3.7945e-53	8.19524e-52	29.6632
chr1	84686001	84687000	hyper	6.04903e-23	4.01435e-22	23.823
chr1	84745001	84746000	hyper	4.33157e-24	3.04743e-23	21.0836
chr1	84834001	84835000	hyper	3.75813e-19	2.02348e-18	23.0796
chr1	84848001	84849000	hyper	3.69408e-14	1.43498e-13	21.1003
chr1	84934001	84935000	hyper	1.21881e-21	7.54497e-21	25.5444
chr1	85013001	85014000	hyper	1.50901e-27	1.25041e-26	27.7805
chr1	85205001	85206000	hyper	1.68962e-29	1.52991e-28	26.5676
chr1	85235001	85236000	hyper	5.16104e-32	5.21487e-31	31.8333
chr1	85276001	85277000	hyper	3.44302e-21	2.07941e-20	25.1786
chr1	85578001	85579000	hyper	3.68172e-23	2.4705e-22	26.7264
chr1	85581001	85582000	hyper	2.8833e-31	2.82122e-30	26.9197
chr1	85584001	85585000	hyper	1.01427e-30	9.68888e-30	22.8147
chr1	85585001	85586000	hyper	8.75071e-23	5.76029e-22	20.7854
chr1	85683001	85684000	hyper	6.91393e-32	6.94593e-31	22.4095
chr1	85884001	85885000	hyper	4.19283e-22	2.65852e-21	26.7979
chr1	86100001	86101000	hyper	1.73892e-47	3.1169e-46	33.9827
chr1	86101001	86102000	hyper	6.73156e-50	1.30829e-48	33.645
chr1	86265001	86266000	hyper	3.27405e-15	1.37061e-14	21.4426
chr1	86419001	86420000	hyper	2.55276e-18	1.30843e-17	24.0582
chr1	86495001	86496000	hyper	9.64256e-38	1.22517e-36	25.6704
chr1	86939001	86940000	hyper	6.22704e-17	2.9245e-16	20.839
chr1	87104001	87105000	hyper	2.36299e-34	2.62859e-33	32.7154
chr1	87351001	87352000	hypo	1.11583e-36	1.36057e-35	-20.9504
chr1	87377001	87378000	hypo	6.76593e-15	2.77163e-14	-20.8556
chr1	87441001	87442000	hyper	1.63684e-21	1.0062e-20	23.4722
chr1	87468001	87469000	hypo	1.26679e-18	6.60992e-18	-21.2773
chr1	87474001	87475000	hyper	5.20542e-24	3.64708e-23	21.6762
chr1	87488001	87489000	hyper	2.31502e-15	9.79324e-15	21.4327
chr1	87579001	87580000	hyper	1.23942e-19	6.86082e-19	20.2406
chr1	87609001	87610000	hypo	7.21957e-21	4.28237e-20	-25.3901
chr1	87837001	87838000	hypo	6.74514e-35	7.67951e-34	-32.6168
chr1	87912001	87913000	hyper	4.42669e-47	7.83069e-46	31.4188
chr1	87927001	87928000	hyper	8.43728e-26	6.44641e-25	23.203
chr1	88343001	88344000	hypo	5.57679e-25	4.09849e-24	-21.3472
chr1	88417001	88418000	hyper	4.36588e-142	7.36455e-140	25.1058
chr1	88881001	88882000	hyper	2.68276e-28	2.30051e-27	30.4012
chr1	89098001	89099000	hyper	4.0761e-17	1.93679e-16	21.8037
chr1	89121001	89122000	hyper	3.27653e-23	2.20399e-22	29.7962
chr1	89375001	89376000	hyper	5.6018e-19	2.98491e-18	23.7112
chr1	89486001	89487000	hyper	1.71907e-34	1.92448e-33	27.5602
chr1	89543001	89544000	hyper	4.54127e-28	3.85634e-27	27.5065
chr1	89572001	89573000	hyper	1.05411e-25	8.01868e-25	23.4583
chr1	89592001	89593000	hypo	8.33814e-44	1.31289e-42	-24.9032
chr1	89621001	89622000	hyper	4.87174e-19	2.60614e-18	20.6461
chr1	89624001	89625000	hyper	4.97734e-34	5.4636e-33	24.0566
chr1	89653001	89654000	hyper	7.01224e-27	5.64338e-26	22.8292
chr1	89676001	89677000	hyper	1.05438e-80	4.84759e-79	39.6075
chr1	89677001	89678000	hyper	2.23893e-35	2.59543e-34	21.4068
chr1	89684001	89685000	hyper	1.71113e-38	2.23153e-37	21.7292
chr1	89685001	89686000	hyper	1.18473e-47	2.13514e-46	38.7603
chr1	89764001	89765000	hyper	1.96138e-34	2.18938e-33	26.5581
chr1	89852001	89853000	hyper	5.90102e-72	2.1678e-70	33.853
chr1	89875001	89876000	hyper	3.56085e-30	3.32021e-29	27.9115
chr1	89876001	89877000	hyper	6.96229e-74	2.69351e-72	35.0295
chr1	89878001	89879000	hyper	4.45566e-23	2.9765e-22	22.0401
chr1	89970001	89971000	hypo	2.10371e-95	1.36898e-93	-30.1161
chr1	90018001	90019000	hyper	2.34664e-45	3.90206e-44	28.5961
chr1	90020001	90021000	hyper	5.39656e-40	7.42485e-39	33.3521
chr1	90028001	90029000	hyper	1.80119e-21	1.10478e-20	24.0353
chr1	90033001	90034000	hyper	4.64042e-20	2.63115e-19	23.4453
chr1	90075001	90076000	hyper	1.59229e-33	1.71062e-32	26.9686
chr1	90102001	90103000	hyper	4.03684e-31	3.92327e-30	21.8622
chr1	90127001	90128000	hyper	9.35056e-27	7.48177e-26	20.3972
chr1	90169001	90170000	hyper	2.79216e-36	3.35211e-35	31.7395
chr1	90188001	90189000	hyper	3.31412e-38	4.2782e-37	24.1075
chr1	90194001	90195000	hyper	1.22914e-30	1.16946e-29	24.7477
chr1	90303001	90304000	hyper	1.48995e-25	1.12496e-24	21.9151
chr1	92012001	92013000	hyper	1.28007e-27	1.06403e-26	28.7074
chr1	92559001	92560000	hyper	1.17283e-56	2.8213e-55	35.8096
chr1	93644001	93645000	hyper	4.06758e-44	6.47261e-43	39.0062
chr1	94372001	94373000	hyper	5.23537e-20	2.96099e-19	24.1098
chr1	94677001	94678000	hyper	2.01168e-20	1.16423e-19	20.0474
chr1	94678001	94679000	hyper	2.9092e-28	2.49118e-27	21.8913
chr1	94856001	94857000	hyper	4.97765e-51	1.00545e-49	26.4554
chr1	94928001	94929000	hypo	1.47214e-19	8.11498e-19	-22.4725
chr1	94957001	94958000	hyper	2.54344e-22	1.63283e-21	22.5301
chr1	94988001	94989000	hyper	1.1293e-32	1.17239e-31	26.7096
chr1	95200001	95201000	hyper	2.58045e-67	8.4055e-66	38.8466
chr1	95209001	95210000	hyper	1.01694e-36	1.24188e-35	23.9524
chr1	95211001	95212000	hyper	1.11729e-44	1.81506e-43	25.2349
chr1	95295001	95296000	hyper	9.24301e-53	1.97424e-51	37.8553
chr1	95304001	95305000	hyper	2.16223e-57	5.32054e-56	37.153
chr1	95305001	95306000	hyper	2.55467e-39	3.43123e-38	32.0236
chr1	95317001	95318000	hyper	6.15621e-21	3.66464e-20	26.0242
chr1	95318001	95319000	hyper	1.85319e-55	4.29132e-54	39.6951
chr1	95331001	95332000	hyper	2.86191e-27	2.34346e-26	22.2918
chr1	95361001	95362000	hyper	8.33769e-84	4.13593e-82	31.9488
chr1	95363001	95364000	hyper	1.15416e-106	9.6364e-105	38.4783
chr1	95372001	95373000	hyper	1.36057e-35	1.59001e-34	33.3335
chr1	95376001	95377000	hyper	8.08146e-47	1.41624e-45	32.9333
chr1	95385001	95386000	hyper	6.01705e-28	5.08115e-27	20.7636
chr1	95465001	95466000	hyper	1.51266e-61	4.18993e-60	31.9331
chr1	95466001	95467000	hyper	2.6154e-30	2.45292e-29	27.4476
chr1	95515001	95516000	hyper	1.1152e-37	1.41336e-36	27.2773
chr1	95538001	95539000	hyper	5.2336e-16	2.3122e-15	21.0562
chr1	95557001	95558000	hyper	4.15709e-34	4.57798e-33	23.4744
chr1	95586001	95587000	hypo	3.91125e-26	3.03856e-25	-29.297
chr1	95642001	95643000	hyper	5.54861e-18	2.78517e-17	20.4083
chr1	95686001	95687000	hypo	1.01976e-73	3.9251e-72	-33.8592
chr1	95744001	95745000	hyper	6.39805e-23	4.24091e-22	22.292
chr1	95752001	95753000	hyper	5.62321e-25	4.13157e-24	20.9579
chr1	95899001	95900000	hypo	5.70627e-53	1.22627e-51	-33.0926
chr1	95903001	95904000	hyper	2.19707e-40	3.06791e-39	29.0493
chr1	95951001	95952000	hyper	9.648e-30	8.83048e-29	22.427
chr1	95952001	95953000	hyper	5.63604e-64	1.67477e-62	32.9032
chr1	95963001	95964000	hyper	3.84349e-41	5.51974e-40	33.5294
chr1	95979001	95980000	hyper	1.29251e-54	2.91942e-53	26.4326
chr1	96079001	96080000	hyper	1.55243e-92	9.43953e-91	39.2732
chr1	96135001	96136000	hyper	9.08334e-50	1.75527e-48	34.5144
chr1	96136001	96137000	hyper	7.50646e-46	1.26993e-44	26.6081
chr1	96138001	96139000	hyper	2.56015e-51	5.22368e-50	41.6399
chr1	96177001	96178000	hypo	3.58099e-21	2.16061e-20	-24.2996
chr1	96187001	96188000	hypo	7.56204e-20	4.23859e-19	-20.922
chr1	96217001	96218000	hyper	9.58596e-33	9.9831e-32	26.6383
chr1	96218001	96219000	hyper	9.72622e-25	7.06629e-24	24.9834
chr1	96235001	96236000	hyper	1.17909e-32	1.22295e-31	21.3526
chr1	96241001	96242000	hypo	4.14324e-95	2.6752e-93	-34.7437
chr1	96307001	96308000	hypo	8.4678e-46	1.4302e-44	-28.5895
chr1	96312001	96313000	hyper	7.73099e-95	4.95747e-93	37.7141
chr1	96313001	96314000	hyper	2.4919e-37	3.11703e-36	23.6086
chr1	96345001	96346000	hyper	1.40837e-53	3.08467e-52	29.4352
chr1	96363001	96364000	hypo	6.93045e-110	6.1699e-108	-45.1814
chr1	96397001	96398000	hypo	5.61653e-127	7.11796e-125	-52.7597
chr1	96555001	96556000	hypo	3.60053e-45	5.94991e-44	-29.6379
chr1	96609001	96610000	hyper	1.08605e-29	9.91648e-29	26.2829
chr1	96722001	96723000	hyper	2.78835e-28	2.38947e-27	21.2049
chr1	96723001	96724000	hyper	9.97048e-31	9.52827e-30	24.2088
chr1	96957001	96958000	hypo	1.99008e-24	1.424e-23	-25.2338
chr1	96966001	96967000	hypo	4.29703e-22	2.72302e-21	-20.7612
chr1	97018001	97019000	hyper	1.17113e-39	1.59127e-38	20.9066
chr1	97064001	97065000	hyper	9.79082e-31	9.35861e-30	27.1852
chr1	97159001	97160000	hyper	2.62785e-35	3.04001e-34	28.9883
chr1	97188001	97189000	hyper	1.45015e-56	3.47756e-55	33.9862
chr1	97198001	97199000	hyper	8.61634e-65	2.61776e-63	29.0561
chr1	97200001	97201000	hyper	4.73714e-23	3.16136e-22	21.9086
chr1	97212001	97213000	hyper	2.74156e-33	2.92029e-32	27.4808
chr1	97213001	97214000	hyper	7.90764e-25	5.76843e-24	27.8718
chr1	97265001	97266000	hyper	1.04241e-82	5.04333e-81	29.0103
chr1	97275001	97276000	hypo	4.81895e-43	7.39267e-42	-27.3196
chr1	97331001	97332000	hyper	1.2233e-24	8.84537e-24	25.6329
chr1	97458001	97459000	hyper	1.02189e-22	6.70213e-22	23.0355
chr1	97484001	97485000	hyper	9.69503e-37	1.18508e-35	36.1664
chr1	97500001	97501000	hypo	2.85622e-39	3.82946e-38	-33.7684
chr1	97514001	97515000	hypo	6.06465e-23	4.02442e-22	-25.4085
chr1	97533001	97534000	hypo	1.87515e-76	7.71801e-75	-39.2851
chr1	97690001	97691000	hyper	1.38769e-62	3.96686e-61	41.3735
chr1	97741001	97742000	hyper	4.98947e-24	3.49986e-23	22.8443
chr1	97764001	97765000	hyper	2.95452e-24	2.0956e-23	24.8853
chr1	97817001	97818000	hyper	7.39261e-42	1.08865e-40	30.7436
chr1	97818001	97819000	hyper	4.71895e-83	2.30338e-81	26.9129
chr1	97842001	97843000	hyper	1.11911e-18	5.85718e-18	20.5449
chr1	97843001	97844000	hypo	2.14253e-21	1.3087e-20	-27.6097
chr1	97865001	97866000	hypo	4.60991e-38	5.91961e-37	-32.9652
chr1	98036001	98037000	hyper	3.32354e-20	1.89955e-19	22.0644
chr1	98081001	98082000	hyper	2.7197e-43	4.21048e-42	26.8605
chr1	98086001	98087000	hypo	1.21043e-30	1.15206e-29	-22.9465
chr1	98111001	98112000	hyper	1.71048e-16	7.80868e-16	23.3453
chr1	98292001	98293000	hyper	2.75321e-47	4.90254e-46	33.2668
chr1	98576001	98577000	hyper	9.06575e-46	1.5296e-44	32.0757
chr1	98587001	98588000	hyper	1.13107e-20	6.63642e-20	25.9027
chr1	98660001	98661000	hyper	1.00203e-24	7.27537e-24	27.8161
chr1	98807001	98808000	hyper	8.52437e-25	6.20997e-24	27.9545
chr1	98903001	98904000	hyper	1.46961e-23	1.00619e-22	21.5768
chr1	98998001	98999000	hyper	9.58839e-21	5.64803e-20	25.0009
chr1	99114001	99115000	hyper	4.47694e-14	1.72782e-13	21.2681
chr1	99180001	99181000	hyper	1.18247e-44	1.91968e-43	26.4591
chr1	99315001	99316000	hyper	2.05362e-33	2.19795e-32	30.1348
chr1	99316001	99317000	hyper	8.37213e-53	1.79101e-51	37.2188
chr1	99370001	99371000	hyper	6.72934e-28	5.67033e-27	28.8911
chr1	99381001	99382000	hypo	8.41051e-60	2.21391e-58	-35.5827
chr1	99386001	99387000	hyper	8.56406e-34	9.30424e-33	32.4585
chr1	99549001	99550000	hyper	6.12318e-35	6.98569e-34	28.7852
chr1	99668001	99669000	hyper	7.52831e-52	1.56182e-50	37.1573
chr1	99704001	99705000	hyper	7.21138e-30	6.63711e-29	25.9491
chr1	99878001	99879000	hyper	2.2123e-16	1.00221e-15	21.064
chr1	100021001	100022000	hyper	6.82168e-25	4.99175e-24	27.671
chr1	101465001	101466000	hyper	1.99901e-52	4.22271e-51	31.6874
chr1	101549001	101550000	hyper	4.09774e-16	1.82312e-15	21.8622
chr1	101783001	101784000	hyper	1.08114e-29	9.87222e-29	26.1119
chr1	101875001	101876000	hyper	2.02829e-45	3.37948e-44	26.2998
chr1	105112001	105113000	hyper	1.86434e-16	8.48762e-16	20.4557
chr1	105784001	105785000	hyper	3.55808e-55	8.17501e-54	31.3514
chr1	105975001	105976000	hyper	8.62181e-40	1.17705e-38	31.637
chr1	105979001	105980000	hyper	5.82126e-21	3.46972e-20	25.4494
chr1	106022001	106023000	hyper	1.44527e-16	6.62942e-16	24.039
chr1	106098001	106099000	hyper	1.25266e-22	8.17735e-22	26.7522
chr1	106106001	106107000	hyper	2.18187e-37	2.73483e-36	34.0604
chr1	106129001	106130000	hyper	3.36371e-32	3.42479e-31	28.6085
chr1	106205001	106206000	hyper	2.07064e-22	1.33626e-21	27.889
chr1	106411001	106412000	hyper	6.71231e-46	1.13777e-44	25.9596
chr1	106662001	106663000	hyper	1.01303e-46	1.7681e-45	25.752
chr1	107008001	107009000	hyper	4.09321e-33	4.32805e-32	30.3283
chr1	107030001	107031000	hyper	1.17104e-32	1.21492e-31	32.2168
chr1	107076001	107077000	hyper	6.04285e-41	8.618e-40	22.6595
chr1	107112001	107113000	hypo	1.007e-33	1.09052e-32	-32.3507
chr1	107160001	107161000	hyper	6.82504e-19	3.6171e-18	21.8458
chr1	107330001	107331000	hypo	3.59225e-64	1.07224e-62	-39.863
chr1	107331001	107332000	hypo	3.08515e-59	8.00119e-58	-40.5489
chr1	107352001	107353000	hyper	2.44073e-34	2.71363e-33	32.0456
chr1	107356001	107357000	hyper	7.09103e-47	1.24521e-45	25.896
chr1	107425001	107426000	hypo	1.56907e-61	4.34429e-60	-32.0806
chr1	107545001	107546000	hypo	3.63722e-69	1.24274e-67	-34.85
chr1	107561001	107562000	hypo	1.26642e-78	5.51481e-77	-35.3844
chr1	107575001	107576000	hyper	6.59338e-18	3.29451e-17	21.7946
chr1	107588001	107589000	hypo	5.69879e-29	5.03615e-28	-22.0665
chr1	107597001	107598000	hyper	6.02387e-37	7.42468e-36	22.8381
chr1	107600001	107601000	hyper	2.68167e-23	1.81243e-22	24.0412
chr1	107616001	107617000	hyper	2.15602e-29	1.94265e-28	24.5686
chr1	107653001	107654000	hyper	1.03503e-49	1.99632e-48	34.6168
chr1	107654001	107655000	hyper	7.93134e-32	7.95024e-31	24.3269
chr1	107717001	107718000	hyper	4.46647e-36	5.31987e-35	21.8357
chr1	107719001	107720000	hypo	1.05075e-26	8.38866e-26	-24.142
chr1	107738001	107739000	hyper	8.55651e-42	1.2571e-40	31.0209
chr1	107775001	107776000	hypo	1.10235e-37	1.39748e-36	-30.1938
chr1	107940001	107941000	hyper	2.16453e-17	1.04679e-16	21.7803
chr1	108122001	108123000	hyper	8.38044e-20	4.68565e-19	21.9357
chr1	108165001	108166000	hyper	1.81287e-18	9.37674e-18	22.0219
chr1	108208001	108209000	hyper	4.48515e-51	9.07137e-50	36.8706
chr1	108307001	108308000	hyper	3.18722e-21	1.92874e-20	20.4398
chr1	108319001	108320000	hyper	6.67196e-28	5.62285e-27	30.9727
chr1	108365001	108366000	hyper	4.93107e-52	1.02912e-50	35.6757
chr1	108373001	108374000	hyper	3.922e-29	3.49082e-28	23.0012
chr1	108385001	108386000	hyper	3.57823e-15	1.49381e-14	21.8229
chr1	108417001	108418000	hyper	5.94139e-41	8.47578e-40	30.2022
chr1	108608001	108609000	hyper	2.3243e-45	3.86536e-44	30.2648
chr1	108659001	108660000	hypo	5.05957e-37	6.25123e-36	-27.3883
chr1	108670001	108671000	hyper	1.10486e-23	7.61456e-23	28.5837
chr1	108671001	108672000	hyper	1.4423e-63	4.23885e-62	31.9068
chr1	108672001	108673000	hyper	7.10629e-31	6.83154e-30	27.4773
chr1	108770001	108771000	hyper	1.09374e-23	7.54038e-23	20.7391
chr1	108802001	108803000	hyper	2.47485e-25	1.84938e-24	23.8527
chr1	108818001	108819000	hyper	8.94244e-81	4.1187e-79	33.173
chr1	108826001	108827000	hyper	8.26581e-68	2.72275e-66	35.6114
chr1	108837001	108838000	hypo	2.50141e-53	5.43615e-52	-41.522
chr1	108849001	108850000	hyper	5.74325e-17	2.70336e-16	22.1429
chr1	108880001	108881000	hypo	7.3874e-20	4.14324e-19	-21.4572
chr1	109953001	109954000	hyper	1.46071e-57	3.61071e-56	37.0708
chr1	109964001	109965000	hypo	2.69083e-42	4.02246e-41	-29.2104
chr1	109966001	109967000	hyper	4.38178e-31	4.25097e-30	24.8925
chr1	110072001	110073000	hyper	3.3618e-24	2.37848e-23	25.5237
chr1	110127001	110128000	hyper	2.27228e-19	1.23893e-18	20.5216
chr1	110269001	110270000	hypo	7.35745e-39	9.72815e-38	-24.3823
chr1	110323001	110324000	hyper	5.38611e-26	4.15634e-25	29.523
chr1	110341001	110342000	hyper	3.48879e-28	2.97809e-27	28.0349
chr1	110423001	110424000	hyper	6.76664e-26	5.19547e-25	25.1011
chr1	110435001	110436000	hypo	1.88062e-73	7.1901e-72	-34.8302
chr1	110450001	110451000	hyper	3.64424e-36	4.35624e-35	32.3903
chr1	110452001	110453000	hyper	5.64415e-48	1.028e-46	35.3944
chr1	110474001	110475000	hyper	6.25828e-85	3.19351e-83	27.3802
chr1	110479001	110480000	hypo	7.16811e-87	3.82904e-85	-24.4889
chr1	110490001	110491000	hypo	1.90303e-28	1.64281e-27	-23.6326
chr1	110498001	110499000	hyper	8.37888e-56	1.96302e-54	25.8986
chr1	110507001	110508000	hypo	2.80417e-49	5.33799e-48	-22.7271
chr1	110519001	110520000	hyper	3.74127e-54	8.32717e-53	20.8067
chr1	110520001	110521000	hyper	4.41568e-39	5.88258e-38	22.883
chr1	110533001	110534000	hyper	1.15461e-116	1.17809e-114	35.7276
chr1	110554001	110555000	hyper	2.88214e-38	3.72954e-37	35.0085
chr1	110612001	110613000	hyper	1.20422e-26	9.58587e-26	30.4143
chr1	110892001	110893000	hyper	4.30216e-24	3.02717e-23	20.2605
chr1	110894001	110895000	hyper	3.12381e-29	2.79254e-28	20.3193
chr1	110895001	110896000	hyper	3.24827e-30	3.03423e-29	25.8763
chr1	110896001	110897000	hyper	1.97511e-39	2.66397e-38	23.3827
chr1	110897001	110898000	hyper	4.02681e-37	4.99631e-36	24.1594
chr1	110900001	110901000	hyper	1.51014e-25	1.13985e-24	26.6799
chr1	110942001	110943000	hyper	6.94507e-37	8.53853e-36	24.832
chr1	110952001	110953000	hyper	1.47732e-23	1.01141e-22	20.9426
chr1	111000001	111001000	hyper	3.05276e-45	5.05422e-44	28.5542
chr1	111132001	111133000	hyper	1.3209e-44	2.13966e-43	32.0644
chr1	111153001	111154000	hyper	4.44534e-12	1.46756e-11	20.0928
chr1	111188001	111189000	hypo	8.27599e-14	3.13023e-13	-20.7434
chr1	111193001	111194000	hyper	7.23064e-30	6.65427e-29	30.1932
chr1	111559001	111560000	hyper	6.66983e-64	1.97782e-62	36.0943
chr1	111671001	111672000	hyper	6.90826e-17	3.2349e-16	24.9827
chr1	111688001	111689000	hypo	1.69516e-24	1.21709e-23	-23.6495
chr1	111731001	111732000	hypo	2.78597e-33	2.96644e-32	-27.5066
chr1	111743001	111744000	hyper	6.74884e-30	6.21988e-29	27.5055
chr1	111744001	111745000	hyper	4.96062e-46	8.44432e-45	29.6289
chr1	111761001	111762000	hyper	8.56251e-47	1.49887e-45	25.3684
chr1	111833001	111834000	hyper	9.69168e-24	6.69809e-23	26.4975
chr1	111920001	111921000	hyper	1.51362e-34	1.69816e-33	38.0564
chr1	111945001	111946000	hyper	9.11478e-29	7.98202e-28	21.9617
chr1	111956001	111957000	hyper	1.02151e-24	7.4118e-24	27.359
chr1	112211001	112212000	hyper	3.17951e-23	2.14018e-22	28.3933
chr1	112801001	112802000	hypo	7.57164e-24	5.26212e-23	-29.5048
chr1	112865001	112866000	hyper	9.82632e-36	1.15507e-34	32.5194
chr1	113305001	113306000	hyper	6.16734e-25	4.52183e-24	20.6153
chr1	113310001	113311000	hyper	8.76646e-31	8.39555e-30	29.0848
chr1	113335001	113336000	hyper	4.00946e-17	1.9056e-16	23.0731
chr1	113386001	113387000	hyper	1.95905e-58	4.97267e-57	30.7435
chr1	113390001	113391000	hyper	2.79292e-71	1.00772e-69	29.9541
chr1	113392001	113393000	hyper	2.82724e-40	3.9331e-39	35.2288
chr1	113396001	113397000	hyper	1.72293e-26	1.36118e-25	25.6862
chr1	113418001	113419000	hyper	1.65316e-31	1.63379e-30	20.8534
chr1	113453001	113454000	hyper	2.71452e-24	1.92889e-23	27.2698
chr1	113454001	113455000	hyper	2.88328e-51	5.87154e-50	26.7339
chr1	113470001	113471000	hyper	8.75658e-40	1.19508e-38	34.267
chr1	113494001	113495000	hyper	1.64277e-54	3.69876e-53	36.4109
chr1	113495001	113496000	hyper	3.6125e-36	4.31936e-35	35.8033
chr1	113507001	113508000	hyper	7.16611e-49	1.3437e-47	27.5407
chr1	113513001	113514000	hyper	1.72692e-26	1.36421e-25	25.2085
chr1	113518001	113519000	hyper	2.7082e-73	1.02959e-71	26.801
chr1	113674001	113675000	hyper	8.16294e-38	1.03934e-36	24.9993
chr1	114246001	114247000	hyper	1.0329e-21	6.41706e-21	20.3381
chr1	114498001	114499000	hypo	9.57656e-125	1.15787e-122	-45.9685
chr1	114514001	114515000	hypo	5.44031e-17	2.56458e-16	-22.8706
chr1	114608001	114609000	hypo	1.7319e-15	7.386e-15	-24.6289
chr1	114826001	114827000	hyper	1.15029e-22	7.52474e-22	20.1112
chr1	114859001	114860000	hyper	3.61823e-23	2.42893e-22	25.0752
chr1	115079001	115080000	hyper	3.53134e-57	8.63191e-56	43.304
chr1	115120001	115121000	hyper	1.15405e-22	7.54861e-22	22.4559
chr1	115158001	115159000	hyper	2.80074e-48	5.14893e-47	37.9171
chr1	115309001	115310000	hypo	2.57917e-52	5.42843e-51	-31.4794
chr1	115322001	115323000	hypo	2.92395e-33	3.1105e-32	-21.4842
chr1	115330001	115331000	hypo	4.75715e-30	4.41169e-29	-31.8794
chr1	115353001	115354000	hypo	1.96688e-25	1.47658e-24	-24.766
chr1	115356001	115357000	hyper	1.26992e-35	1.48683e-34	20.7946
chr1	115385001	115386000	hypo	3.78388e-61	1.03447e-59	-29.7142
chr1	115423001	115424000	hypo	1.13803e-14	4.58765e-14	-20.8663
chr1	115433001	115434000	hypo	9.27598e-28	7.76274e-27	-25.789
chr1	115459001	115460000	hypo	3.7459e-31	3.6468e-30	-21.9825
chr1	115475001	115476000	hypo	7.0518e-28	5.93533e-27	-24.478
chr1	115520001	115521000	hypo	1.75048e-59	4.56974e-58	-41.9115
chr1	115568001	115569000	hypo	6.90118e-54	1.52568e-52	-34.261
chr1	115738001	115739000	hyper	5.13689e-16	2.2707e-15	22.7327
chr1	115897001	115898000	hypo	2.48215e-18	1.27322e-17	-23.9936
chr1	115912001	115913000	hyper	1.76885e-16	8.06617e-16	22.6408
chr1	115968001	115969000	hyper	3.78722e-38	4.87831e-37	22.0961
chr1	116145001	116146000	hyper	3.05296e-35	3.52224e-34	24.2911
chr1	116659001	116660000	hyper	2.12971e-73	8.12618e-72	37.4327
chr1	116685001	116686000	hyper	1.8144e-94	1.15254e-92	27.3404
chr1	116730001	116731000	hypo	1.25872e-19	6.96531e-19	-20.2626
chr1	116733001	116734000	hypo	6.95961e-25	5.09065e-24	-22.0196
chr1	116737001	116738000	hypo	2.4461e-43	3.79225e-42	-24.9134
chr1	116743001	116744000	hypo	4.56592e-46	7.78147e-45	-31.9318
chr1	116754001	116755000	hypo	1.01115e-74	3.99381e-73	-37.733
chr1	116755001	116756000	hypo	2.38284e-93	1.47585e-91	-49.3289
chr1	116775001	116776000	hyper	1.34744e-34	1.51516e-33	23.3194
chr1	116783001	116784000	hyper	3.59364e-46	6.14975e-45	29.52
chr1	116785001	116786000	hypo	1.45325e-56	3.48479e-55	-24.2551
chr1	116790001	116791000	hypo	2.17032e-39	2.92232e-38	-20.6129
chr1	116805001	116806000	hypo	2.0348e-25	1.5265e-24	-20.2228
chr1	116864001	116865000	hypo	5.77549e-33	6.06916e-32	-23.1845
chr1	116868001	116869000	hyper	5.91824e-18	2.96634e-17	21.1527
chr1	116903001	116904000	hypo	3.61082e-14	1.40382e-13	-22.9528
chr1	116917001	116918000	hypo	1.72251e-28	1.49002e-27	-20.6927
chr1	116927001	116928000	hypo	5.94122e-74	2.30397e-72	-27.758
chr1	116928001	116929000	hypo	4.75447e-68	1.57427e-66	-24.584
chr1	116933001	116934000	hypo	7.77301e-127	9.82822e-125	-38.4911
chr1	116934001	116935000	hypo	2.97927e-100	2.16593e-98	-50.3936
chr1	116962001	116963000	hypo	7.10863e-44	1.12191e-42	-36.098
chr1	116963001	116964000	hypo	7.31018e-64	2.1661e-62	-31.4896
chr1	116964001	116965000	hypo	1.13476e-47	2.04643e-46	-26.5601
chr1	117204001	117205000	hypo	5.30881e-78	2.27482e-76	-29.6748
chr1	117277001	117278000	hypo	3.43148e-65	1.05412e-63	-33.8475
chr1	117279001	117280000	hyper	1.05635e-95	6.92756e-94	37.0531
chr1	117281001	117282000	hyper	3.79202e-22	2.41033e-21	20.3104
chr1	117300001	117301000	hyper	5.80672e-56	1.36836e-54	29.8906
chr1	117370001	117371000	hyper	8.19476e-63	2.35961e-61	32.4502
chr1	117374001	117375000	hyper	2.77625e-60	7.40424e-59	26.0985
chr1	117386001	117387000	hyper	4.12209e-24	2.90321e-23	20.7071
chr1	117390001	117391000	hyper	3.14007e-113	2.99584e-111	37.1451
chr1	117410001	117411000	hyper	2.3335e-41	3.37803e-40	23.46
chr1	117419001	117420000	hyper	2.44264e-30	2.29368e-29	21.5145
chr1	117420001	117421000	hyper	1.94858e-29	1.75949e-28	23.6107
chr1	117421001	117422000	hyper	5.25943e-22	3.31705e-21	21.7479
chr1	117500001	117501000	hyper	5.86428e-96	3.86715e-94	41.6918
chr1	117506001	117507000	hyper	1.26496e-32	1.31035e-31	23.6164
chr1	117507001	117508000	hyper	5.18619e-33	5.46112e-32	30.5495
chr1	117515001	117516000	hyper	3.67858e-20	2.09785e-19	23.5675
chr1	117520001	117521000	hyper	2.53166e-25	1.89107e-24	24.3344
chr1	117521001	117522000	hyper	3.14884e-56	7.47724e-55	33.58
chr1	117527001	117528000	hyper	4.77972e-29	4.23895e-28	29.2995
chr1	117603001	117604000	hypo	1.83283e-15	7.80333e-15	-23.6068
chr1	117610001	117611000	hypo	5.45056e-21	3.25376e-20	-26.3349
chr1	117611001	117612000	hypo	1.15175e-94	7.35124e-93	-41.6293
chr1	117645001	117646000	hypo	1.203e-26	9.57687e-26	-30.1759
chr1	117664001	117665000	hyper	4.57791e-43	7.02804e-42	27.5724
chr1	117697001	117698000	hyper	1.13854e-19	6.31567e-19	21.6912
chr1	117705001	117706000	hyper	5.75164e-37	7.09492e-36	25.5698
chr1	117788001	117789000	hyper	2.57266e-39	3.45455e-38	26.4213
chr1	117795001	117796000	hyper	2.06282e-20	1.19302e-19	25.9621
chr1	117800001	117801000	hyper	8.97434e-59	2.29935e-57	30.6045
chr1	117903001	117904000	hyper	5.11074e-28	4.3303e-27	28.0693
chr1	117904001	117905000	hyper	4.94386e-18	2.48949e-17	20.9841
chr1	117925001	117926000	hyper	1.5145e-54	3.41328e-53	34.2602
chr1	117933001	117934000	hyper	5.77911e-27	4.66781e-26	29.45
chr1	117939001	117940000	hyper	4.91629e-28	4.16852e-27	21.9845
chr1	118126001	118127000	hyper	3.37935e-29	3.01706e-28	20.4849
chr1	118129001	118130000	hyper	3.2543e-27	2.65764e-26	24.0967
chr1	118140001	118141000	hyper	6.05295e-53	1.29995e-51	29.9343
chr1	118158001	118159000	hyper	1.1901e-45	1.99914e-44	34.9741
chr1	118389001	118390000	hyper	4.43693e-88	2.43435e-86	33.6452
chr1	118420001	118421000	hyper	5.89362e-20	3.32387e-19	24.105
chr1	118421001	118422000	hyper	7.80743e-34	8.49672e-33	32.9088
chr1	118480001	118481000	hyper	1.44718e-24	1.04264e-23	22.9357
chr1	118498001	118499000	hyper	4.73191e-63	1.37096e-61	28.9329
chr1	118499001	118500000	hyper	3.38071e-26	2.63404e-25	25.5997
chr1	118506001	118507000	hyper	1.99584e-26	1.5719e-25	26.3124
chr1	118511001	118512000	hyper	4.36596e-27	3.54558e-26	23.9456
chr1	118521001	118522000	hyper	4.79615e-63	1.3892e-61	40.7527
chr1	118529001	118530000	hyper	9.27017e-30	8.49192e-29	22.9728
chr1	118530001	118531000	hyper	3.09091e-78	1.33251e-76	32.1749
chr1	118537001	118538000	hyper	1.10758e-17	5.45886e-17	21.9796
chr1	118551001	118552000	hyper	2.10013e-35	2.43703e-34	25.7693
chr1	118558001	118559000	hyper	1.99375e-37	2.50354e-36	28.2616
chr1	118559001	118560000	hyper	1.38008e-52	2.92981e-51	35.5343
chr1	118560001	118561000	hyper	8.47934e-57	2.0485e-55	32.1194
chr1	118566001	118567000	hyper	1.00104e-24	7.26866e-24	21.8786
chr1	118569001	118570000	hyper	1.84201e-40	2.58081e-39	34.5609
chr1	118571001	118572000	hyper	2.88217e-50	5.66953e-49	29.6879
chr1	118572001	118573000	hyper	5.82222e-67	1.88102e-65	35.2225
chr1	118576001	118577000	hypo	2.13222e-27	1.75532e-26	-27.2809
chr1	118588001	118589000	hyper	3.79474e-28	3.23422e-27	25.4919
chr1	118603001	118604000	hyper	1.30512e-70	4.63182e-69	32.6329
chr1	118604001	118605000	hyper	3.8112e-37	4.7328e-36	33.5492
chr1	118609001	118610000	hyper	2.07226e-134	3.03113e-132	46.4566
chr1	118612001	118613000	hyper	6.22162e-52	1.29422e-50	37.4258
chr1	118619001	118620000	hyper	1.2559e-24	9.07689e-24	26.8209
chr1	118622001	118623000	hyper	9.59097e-65	2.91085e-63	29.5423
chr1	118624001	118625000	hyper	1.25488e-47	2.25906e-46	32.4015
chr1	118625001	118626000	hyper	3.37607e-102	2.56611e-100	36.985
chr1	118626001	118627000	hyper	2.03051e-39	2.73726e-38	20.4616
chr1	118647001	118648000	hyper	1.59755e-48	2.96151e-47	35.7147
chr1	118747001	118748000	hyper	6.91241e-40	9.46862e-39	31.8593
chr1	118797001	118798000	hyper	4.17077e-24	2.93684e-23	24.7149
chr1	118810001	118811000	hyper	1.51216e-33	1.62608e-32	23.8471
chr1	118816001	118817000	hyper	1.81407e-19	9.94607e-19	22.0887
chr1	118848001	118849000	hyper	6.33262e-43	9.67995e-42	40.2382
chr1	118871001	118872000	hyper	6.33512e-15	2.60031e-14	24.2353
chr1	118956001	118957000	hyper	2.64101e-39	3.54513e-38	30.7905
chr1	119026001	119027000	hyper	1.81019e-24	1.29795e-23	20.6744
chr1	119033001	119034000	hypo	1.45167e-21	8.94813e-21	-27.2437
chr1	119065001	119066000	hypo	6.3855e-23	4.23285e-22	-21.1945
chr1	119155001	119156000	hypo	2.55257e-57	6.26768e-56	-41.5638
chr1	119170001	119171000	hyper	5.36567e-107	4.51512e-105	30.1435
chr1	119176001	119177000	hyper	2.30786e-39	3.1042e-38	21.7671
chr1	119177001	119178000	hyper	6.53417e-42	9.63788e-41	27.8679
chr1	119204001	119205000	hyper	1.59032e-15	6.79938e-15	20.3214
chr1	119431001	119432000	hyper	1.43964e-15	6.17371e-15	20.3297
chr1	119446001	119447000	hyper	1.30725e-13	4.87147e-13	21.0675
chr1	119449001	119450000	hypo	7.93581e-40	1.08465e-38	-33.3846
chr1	119456001	119457000	hyper	2.92888e-35	3.38176e-34	22.1149
chr1	119484001	119485000	hypo	8.99535e-35	1.01904e-33	-30.8807
chr1	119584001	119585000	hyper	1.93785e-45	3.23113e-44	24.1901
chr1	119690001	119691000	hyper	3.26179e-28	2.78751e-27	25.0946
chr1	119869001	119870000	hyper	5.35831e-18	2.69254e-17	22.6386
chr1	120034001	120035000	hyper	5.02372e-36	5.97064e-35	20.9033
chr1	120499001	120500000	hyper	1.06708e-19	5.92986e-19	21.382
chr1	121018001	121019000	hyper	2.80819e-20	1.61182e-19	21.2698
chr1	121065001	121066000	hyper	2.59916e-11	8.03719e-11	20.9015
chr1	121854001	121855000	hyper	7.71667e-13	2.70867e-12	20.0475
chr1	122313001	122314000	hyper	4.25119e-19	2.28193e-18	25.8369
chr1	122351001	122352000	hyper	1.08448e-37	1.37505e-36	24.3366
chr1	124005001	124006000	hyper	3.95998e-15	1.64812e-14	22.8521
chr1	124744001	124745000	hypo	5.15728e-36	6.12589e-35	-24.5248
chr1	125019001	125020000	hypo	1.79015e-27	1.47903e-26	-20.784
chr1	125073001	125074000	hypo	1.66854e-36	2.02083e-35	-29.1361
chr1	125105001	125106000	hyper	7.897e-18	3.92721e-17	24.5031
chr1	125290001	125291000	hypo	1.38491e-20	8.08934e-20	-20.0849
chr1	125332001	125333000	hyper	2.30301e-19	1.25519e-18	24.1767
chr1	125370001	125371000	hyper	9.44516e-19	4.96437e-18	22.6125
chr1	125546001	125547000	hyper	2.58402e-21	1.5714e-20	21.2086
chr1	125572001	125573000	hyper	2.03066e-18	1.04731e-17	21.6507
chr1	125640001	125641000	hypo	8.0122e-43	1.22057e-41	-31.6329
chr1	125727001	125728000	hyper	2.32168e-19	1.26507e-18	22.0377
chr1	125747001	125748000	hypo	2.72559e-57	6.68467e-56	-22.649
chr1	125774001	125775000	hyper	1.26526e-20	7.40526e-20	23.4168
chr1	125793001	125794000	hyper	3.16764e-47	5.63069e-46	36.412
chr1	125828001	125829000	hypo	4.15296e-13	1.48895e-12	-21.0023
chr1	125885001	125886000	hypo	2.74607e-35	3.1741e-34	-28.0475
chr1	126025001	126026000	hyper	1.23501e-12	4.26515e-12	20.1369
chr1	126037001	126038000	hyper	1.68735e-14	6.72022e-14	20.372
chr1	126108001	126109000	hyper	9.41644e-26	7.17893e-25	25.8623
chr1	126233001	126234000	hyper	1.30012e-48	2.41748e-47	36.9437
chr1	126375001	126376000	hyper	2.85749e-22	1.8292e-21	21.0178
chr1	126718001	126719000	hyper	2.49628e-39	3.35373e-38	24.7127
chr1	126729001	126730000	hyper	1.22758e-104	9.82723e-103	41.0551
chr1	126732001	126733000	hyper	3.42438e-41	4.92638e-40	27.0816
chr1	126737001	126738000	hyper	2.11107e-25	1.58255e-24	24.6835
chr1	126907001	126908000	hyper	7.05983e-29	6.21056e-28	28.6653
chr1	126991001	126992000	hyper	5.04994e-27	4.08984e-26	25.785
chr1	127013001	127014000	hypo	9.0595e-44	1.42458e-42	-20.6548
chr1	127014001	127015000	hypo	9.92275e-17	4.59963e-16	-20.0631
chr1	127034001	127035000	hyper	5.84226e-70	2.03815e-68	28.0499
chr1	127051001	127052000	hypo	1.80925e-48	3.34732e-47	-33.7779
chr1	127125001	127126000	hyper	8.8828e-46	1.49937e-44	35.2621
chr1	127135001	127136000	hyper	1.92415e-40	2.69331e-39	33.6282
chr1	127136001	127137000	hyper	3.37513e-22	2.15172e-21	23.7687
chr1	127159001	127160000	hyper	3.45633e-35	3.97707e-34	20.2494
chr1	127260001	127261000	hyper	9.23357e-16	4.01421e-15	23.8298
chr1	127282001	127283000	hyper	3.38354e-70	1.18775e-68	27.1608
chr1	127470001	127471000	hypo	2.76113e-15	1.16178e-14	-20.3789
chr1	127484001	127485000	hypo	1.36054e-22	8.86246e-22	-27.2239
chr1	127564001	127565000	hyper	1.08786e-30	1.03776e-29	23.4938
chr1	127568001	127569000	hyper	8.78596e-49	1.64329e-47	25.2981
chr1	127569001	127570000	hyper	2.00325e-60	5.36284e-59	31.9585
chr1	127574001	127575000	hyper	1.73679e-52	3.67587e-51	23.1955
chr1	127583001	127584000	hyper	4.61386e-73	1.74426e-71	32.5358
chr1	127592001	127593000	hyper	1.82784e-33	1.95907e-32	21.2895
chr1	127609001	127610000	hyper	3.55068e-272	4.48175e-269	46.9014
chr1	127660001	127661000	hypo	1.40438e-131	1.94599e-129	-36.2869
chr1	127663001	127664000	hypo	9.45485e-34	1.02505e-32	-23.1936
chr1	127667001	127668000	hypo	1.66311e-22	1.07844e-21	-22.4113
chr1	127672001	127673000	hypo	1.4045e-56	3.36955e-55	-33.0923
chr1	127705001	127706000	hypo	8.47995e-21	5.01049e-20	-23.1467
chr1	127728001	127729000	hyper	1.1705e-32	1.21438e-31	24.5555
chr1	127729001	127730000	hypo	1.08517e-87	5.90807e-86	-35.2719
chr1	127879001	127880000	hyper	2.51372e-40	3.50316e-39	21.8149
chr1	127903001	127904000	hyper	4.77062e-29	4.23122e-28	31.9558
chr1	127904001	127905000	hyper	1.16397e-28	1.01434e-27	20.5087
chr1	128043001	128044000	hyper	2.24465e-57	5.51993e-56	27.8968
chr1	128069001	128070000	hyper	5.19421e-43	7.96001e-42	28.569
chr1	128552001	128553000	hyper	1.55039e-36	1.88052e-35	29.3044
chr1	128557001	128558000	hyper	2.22138e-22	1.43116e-21	23.9488
chr1	128561001	128562000	hyper	4.30588e-67	1.39492e-65	27.97
chr1	128633001	128634000	hyper	2.92567e-45	4.84784e-44	31.0652
chr1	128640001	128641000	hyper	2.95138e-20	1.69199e-19	22.7569
chr1	128641001	128642000	hyper	7.24728e-48	1.31529e-46	30.0994
chr1	128753001	128754000	hyper	2.08739e-19	1.14063e-18	25.2583
chr1	128794001	128795000	hyper	1.31388e-22	8.56756e-22	23.2712
chr1	128836001	128837000	hyper	5.80915e-19	3.09206e-18	25.0114
chr1	128926001	128927000	hyper	5.2455e-21	3.13445e-20	22.243
chr1	128934001	128935000	hyper	1.05325e-29	9.62397e-29	28.5049
chr1	128993001	128994000	hyper	6.31029e-23	4.18426e-22	22.1459
chr1	129004001	129005000	hyper	2.0786e-58	5.27277e-57	24.0395
chr1	129041001	129042000	hyper	5.5098e-12	1.80488e-11	20.28
chr1	129112001	129113000	hyper	1.27759e-30	1.21464e-29	26.8011
chr1	129296001	129297000	hyper	9.15838e-34	9.93493e-33	26.2483
chr1	129558001	129559000	hyper	1.7108e-91	1.01427e-89	30.037
chr1	129567001	129568000	hyper	1.72492e-50	3.41666e-49	33.344
chr1	129730001	129731000	hypo	4.77064e-21	2.85832e-20	-24.9129
chr1	129739001	129740000	hyper	1.89214e-70	6.69079e-69	32.8119
chr1	129801001	129802000	hyper	1.78906e-15	7.62209e-15	23.3389
chr1	129813001	129814000	hyper	3.51551e-70	1.23349e-68	28.1302
chr1	129861001	129862000	hyper	1.33726e-21	8.25902e-21	21.2982
chr1	129883001	129884000	hyper	3.94868e-39	5.26987e-38	24.4228
chr1	129908001	129909000	hyper	7.52861e-20	4.22034e-19	22.1812
chr1	129986001	129987000	hyper	3.43499e-24	2.42894e-23	23.0407
chr1	130159001	130160000	hyper	1.12947e-21	7.00396e-21	21.3349
chr1	130235001	130236000	hypo	7.53773e-44	1.1886e-42	-24.8789
chr1	130258001	130259000	hypo	3.92981e-21	2.36596e-20	-27.2136
chr1	130469001	130470000	hyper	6.65834e-24	4.63988e-23	24.4543
chr1	130554001	130555000	hypo	3.17686e-32	3.23777e-31	-25.7276
chr1	130623001	130624000	hyper	3.71732e-23	2.49396e-22	21.4686
chr1	130669001	130670000	hyper	2.88335e-40	4.00925e-39	25.3879
chr1	130728001	130729000	hypo	6.2393e-26	4.79896e-25	-20.6566
chr1	130833001	130834000	hyper	1.73117e-55	4.01279e-54	24.0243
chr1	130883001	130884000	hypo	2.41212e-21	1.46927e-20	-20.7759
chr1	130944001	130945000	hyper	9.6911e-18	4.79365e-17	22.7238
chr1	131043001	131044000	hyper	2.16037e-41	3.13133e-40	24.0417
chr1	131053001	131054000	hyper	5.44267e-39	7.22838e-38	20.5879
chr1	131054001	131055000	hypo	6.35966e-18	3.18123e-17	-20.4569
chr1	131060001	131061000	hyper	3.95916e-45	6.53345e-44	20.3743
chr1	131062001	131063000	hyper	6.07046e-35	6.92662e-34	23.2289
chr1	131142001	131143000	hyper	8.61153e-27	6.90239e-26	27.5931
chr1	131457001	131458000	hyper	7.23287e-30	6.65619e-29	32.851
chr1	131657001	131658000	hyper	1.01558e-41	1.48883e-40	32.2651
chr1	131804001	131805000	hyper	9.19285e-24	6.36015e-23	20.9217
chr1	131898001	131899000	hyper	7.77843e-48	1.40994e-46	24.3618
chr1	131904001	131905000	hyper	7.96505e-29	6.99232e-28	20.6617
chr1	132110001	132111000	hypo	1.03768e-52	2.21244e-51	-27.3663
chr1	132176001	132177000	hyper	1.43528e-88	7.96127e-87	28.9576
chr1	132177001	132178000	hyper	1.33502e-125	1.64307e-123	40.3609
chr1	132182001	132183000	hyper	8.84215e-43	1.34463e-41	23.6276
chr1	132188001	132189000	hyper	7.6791e-44	1.21059e-42	22.1419
chr1	132288001	132289000	hyper	1.21221e-20	7.10213e-20	20.4327
chr1	132318001	132319000	hypo	3.94213e-29	3.5081e-28	-24.1284
chr1	132350001	132351000	hyper	1.49435e-34	1.67718e-33	29.2744
chr1	132366001	132367000	hyper	2.17005e-40	3.03076e-39	22.8783
chr1	132373001	132374000	hyper	2.01543e-32	2.07175e-31	28.9386
chr1	132428001	132429000	hyper	1.01054e-62	2.89986e-61	33.8384
chr1	132608001	132609000	hypo	1.37915e-44	2.2322e-43	-28.0172
chr1	132963001	132964000	hyper	9.53764e-22	5.93515e-21	24.0832
chr1	133008001	133009000	hypo	1.17538e-19	6.51485e-19	-20.1803
chr1	133088001	133089000	hyper	1.83384e-20	1.06359e-19	26.0229
chr1	133137001	133138000	hyper	2.11932e-56	5.05989e-55	32.5944
chr1	133352001	133353000	hyper	6.08792e-31	5.87156e-30	23.7199
chr1	133370001	133371000	hyper	1.27121e-37	1.60728e-36	33.2146
chr1	133394001	133395000	hyper	1.27636e-20	7.46821e-20	25.4185
chr1	133487001	133488000	hyper	7.71753e-40	1.05534e-38	30.6923
chr1	133496001	133497000	hyper	7.8003e-42	1.14765e-40	24.1318
chr1	133509001	133510000	hyper	2.42946e-52	5.11871e-51	25.3473
chr1	133510001	133511000	hyper	8.79524e-18	4.36275e-17	21.3194
chr1	133607001	133608000	hyper	5.38785e-25	3.96256e-24	23.5344
chr1	133674001	133675000	hyper	7.57739e-45	1.23847e-43	25.5619
chr1	133745001	133746000	hyper	8.24746e-24	5.71895e-23	23.1402
chr1	133749001	133750000	hyper	4.69085e-26	3.63028e-25	28.4707
chr1	133763001	133764000	hyper	3.98378e-27	3.24216e-26	22.4137
chr1	133783001	133784000	hyper	3.098e-27	2.53282e-26	23.6218
chr1	133928001	133929000	hyper	4.00253e-14	1.55047e-13	20.6016
chr1	134007001	134008000	hyper	2.35783e-54	5.28276e-53	39.702
chr1	134010001	134011000	hypo	5.23174e-51	1.05619e-49	-34.6327
chr1	134035001	134036000	hyper	5.07083e-28	4.29731e-27	28.2248
chr1	134076001	134077000	hyper	2.27206e-29	2.04443e-28	28.8916
chr1	134172001	134173000	hyper	1.48607e-49	2.85385e-48	24.32
chr1	134200001	134201000	hyper	2.52025e-14	9.90904e-14	20.504
chr1	134237001	134238000	hyper	1.3087e-19	7.23332e-19	22.5769
chr1	134303001	134304000	hyper	3.01387e-40	4.18624e-39	29.6408
chr1	134453001	134454000	hyper	2.15874e-20	1.24713e-19	20.085
chr1	134496001	134497000	hyper	1.2141e-31	1.2068e-30	22.2567
chr1	134501001	134502000	hyper	6.39871e-87	3.42388e-85	31.9378
chr1	134515001	134516000	hyper	2.10484e-47	3.76158e-46	27.7361
chr1	134538001	134539000	hyper	1.20771e-66	3.86712e-65	27.5244
chr1	134579001	134580000	hyper	3.83226e-28	3.26525e-27	27.9817
chr1	134600001	134601000	hyper	1.32867e-54	3.00002e-53	21.2349
chr1	134604001	134605000	hyper	9.16179e-30	8.39508e-29	23.052
chr1	134608001	134609000	hyper	2.59593e-29	2.32941e-28	26.1729
chr1	134656001	134657000	hyper	2.26015e-39	3.04151e-38	23.6372
chr1	134717001	134718000	hyper	5.3023e-26	4.09296e-25	20.4162
chr1	134737001	134738000	hyper	1.36857e-55	3.18237e-54	23.4875
chr1	134751001	134752000	hyper	1.74255e-63	5.11235e-62	30.7544
chr1	134858001	134859000	hyper	1.35737e-78	5.9056e-77	26.3387
chr1	134873001	134874000	hyper	3.73871e-65	1.14746e-63	32.2389
chr1	134874001	134875000	hyper	2.40317e-16	1.08611e-15	23.7125
chr1	134891001	134892000	hyper	4.76509e-31	4.61469e-30	25.0458
chr1	134893001	134894000	hyper	2.67038e-22	1.71217e-21	22.3705
chr1	134939001	134940000	hyper	9.92832e-28	8.29649e-27	24.9031
chr1	134949001	134950000	hyper	2.50083e-50	4.92822e-49	21.6255
chr1	134954001	134955000	hyper	6.8564e-73	2.57961e-71	28.4564
chr1	134993001	134994000	hyper	5.40792e-125	6.57109e-123	35.1075
chr1	134994001	134995000	hyper	6.54244e-43	9.99476e-42	23.9478
chr1	135006001	135007000	hyper	7.13946e-70	2.48379e-68	31.0828
chr1	135294001	135295000	hyper	6.7998e-21	4.03802e-20	20.1285
chr1	135367001	135368000	hyper	2.47673e-111	2.27264e-109	34.1777
chr1	135368001	135369000	hyper	2.92137e-113	2.79022e-111	36.1457
chr1	135369001	135370000	hyper	1.32145e-36	1.60674e-35	20.8464
chr1	135390001	135391000	hyper	3.11593e-43	4.8127e-42	27.6472
chr1	135395001	135396000	hyper	1.56368e-21	9.6234e-21	20.2083
chr1	135412001	135413000	hyper	1.77763e-31	1.75476e-30	27.9874
chr1	135413001	135414000	hyper	1.44915e-119	1.57055e-117	37.9087
chr1	135427001	135428000	hyper	3.49978e-17	1.66988e-16	20.538
chr1	135428001	135429000	hyper	3.00223e-71	1.08236e-69	27.5037
chr1	135559001	135560000	hypo	7.97055e-32	7.98771e-31	-24.5963
chr1	135685001	135686000	hyper	5.88239e-30	5.4354e-29	23.282
chr1	135708001	135709000	hyper	6.18334e-38	7.90356e-37	33.7127
chr1	135871001	135872000	hypo	3.10512e-25	2.30952e-24	-20.38
chr1	135895001	135896000	hyper	4.96281e-46	8.44773e-45	36.7367
chr1	135969001	135970000	hyper	7.9545e-27	6.3852e-26	25.307
chr1	135983001	135984000	hyper	2.17578e-46	3.7519e-45	27.9571
chr1	135984001	135985000	hyper	5.56312e-146	1.00561e-143	38.2994
chr1	136003001	136004000	hyper	7.35281e-35	8.35641e-34	29.7004
chr1	136410001	136411000	hyper	3.48433e-30	3.2501e-29	27.0907
chr1	136662001	136663000	hyper	9.60871e-39	1.26466e-37	28.7287
chr1	136809001	136810000	hypo	8.65098e-20	4.83212e-19	-26.8676
chr1	136892001	136893000	hyper	5.12204e-47	9.04e-46	24.6007
chr1	137186001	137187000	hypo	1.84037e-32	1.8947e-31	-28.5872
chr1	137298001	137299000	hyper	2.80277e-27	2.29586e-26	26.216
chr1	138409001	138410000	hyper	2.55536e-24	1.81812e-23	24.0624
chr1	138600001	138601000	hyper	8.93518e-20	4.98687e-19	22.8611
chr1	138727001	138728000	hyper	3.23371e-24	2.28985e-23	24.7532
chr1	139014001	139015000	hyper	1.67105e-81	7.84203e-80	50.9302
chr1	139026001	139027000	hyper	6.09559e-26	4.69081e-25	23.8868
chr1	139086001	139087000	hyper	4.44588e-27	3.60901e-26	29.1398
chr1	139218001	139219000	hyper	3.32854e-24	2.35553e-23	20.7521
chr1	139347001	139348000	hyper	6.6287e-17	3.10808e-16	21.3917
chr1	139367001	139368000	hyper	4.16201e-46	7.10192e-45	32.9663
chr1	139375001	139376000	hyper	1.92034e-23	1.30711e-22	27.6956
chr1	139410001	139411000	hyper	1.05359e-53	2.31813e-52	30.8918
chr1	139471001	139472000	hyper	2.63621e-30	2.47228e-29	26.437
chr1	139473001	139474000	hyper	1.20965e-79	5.40697e-78	35.0558
chr1	139782001	139783000	hyper	2.27548e-39	3.06149e-38	20.28
chr1	139826001	139827000	hyper	7.12975e-33	7.46584e-32	29.0624
chr1	139827001	139828000	hyper	1.82394e-221	1.11584e-218	36.3443
chr1	139888001	139889000	hyper	2.46169e-33	2.62728e-32	25.6273
chr1	139995001	139996000	hyper	1.33828e-54	3.02111e-53	29.5586
chr1	140060001	140061000	hyper	8.18628e-34	8.9024e-33	27.1792
chr1	140312001	140313000	hyper	1.37539e-34	1.54595e-33	21.9933
chr1	140468001	140469000	hyper	2.7838e-41	4.01825e-40	34.8231
chr1	140495001	140496000	hyper	9.38541e-15	3.80498e-14	21.052
chr1	140637001	140638000	hypo	1.05801e-41	1.55005e-40	-26.4655
chr1	140733001	140734000	hyper	6.3713e-115	6.28762e-113	36.4759
chr1	140860001	140861000	hyper	8.61568e-17	4.0091e-16	21.1992
chr1	141009001	141010000	hypo	8.58507e-23	5.65362e-22	-22.867
chr1	141101001	141102000	hyper	5.56978e-41	7.9534e-40	26.3844
chr1	141122001	141123000	hyper	1.2661e-15	5.45134e-15	24.1774
chr1	141287001	141288000	hyper	6.23628e-21	3.7111e-20	29.0196
chr1	141323001	141324000	hypo	1.10062e-20	6.46212e-20	-21.2184
chr1	141341001	141342000	hyper	1.11682e-70	3.97125e-69	24.6015
chr1	141347001	141348000	hyper	7.27011e-47	1.2765e-45	21.1186
chr1	141356001	141357000	hyper	3.73013e-34	4.11688e-33	20.122
chr1	141357001	141358000	hyper	6.42829e-137	9.80775e-135	35.6903
chr1	141364001	141365000	hyper	3.64279e-35	4.18844e-34	33.5112
chr1	141373001	141374000	hyper	3.23124e-26	2.52008e-25	27.4572
chr1	141424001	141425000	hyper	8.24946e-21	4.87739e-20	21.4943
chr1	141429001	141430000	hyper	3.12589e-35	3.60431e-34	22.8613
chr1	141447001	141448000	hypo	1.35211e-19	7.46797e-19	-21.2353
chr1	141452001	141453000	hypo	2.96076e-25	2.20469e-24	-23.781
chr1	141455001	141456000	hyper	1.60507e-45	2.68513e-44	24.195
chr1	141488001	141489000	hyper	2.75164e-52	5.78671e-51	28.1898
chr1	141496001	141497000	hyper	6.27657e-35	7.15716e-34	29.5529
chr1	141516001	141517000	hyper	8.09502e-27	6.4961e-26	28.5311
chr1	141517001	141518000	hyper	4.29569e-20	2.44022e-19	21.3381
chr1	141554001	141555000	hyper	8.41592e-84	4.17332e-82	27.1798
chr1	141557001	141558000	hypo	2.09473e-14	8.28189e-14	-20.7325
chr1	141624001	141625000	hyper	4.56818e-38	5.86671e-37	25.0411
chr1	141649001	141650000	hyper	3.96363e-34	4.368e-33	25.2515
chr1	141706001	141707000	hyper	1.54156e-86	8.17499e-85	25.6294
chr1	141726001	141727000	hyper	1.9947e-28	1.72019e-27	22.7247
chr1	141751001	141752000	hyper	1.76902e-120	1.96027e-118	34.4855
chr1	141752001	141753000	hyper	2.70764e-37	3.38266e-36	25.1215
chr1	141797001	141798000	hyper	5.13118e-96	3.38575e-94	42.7189
chr1	141799001	141800000	hyper	9.53268e-23	6.26246e-22	23.8157
chr1	141890001	141891000	hyper	2.17244e-131	3.00173e-129	37.5147
chr1	141895001	141896000	hyper	1.17231e-26	9.33742e-26	28.3707
chr1	141919001	141920000	hyper	9.34681e-57	2.25547e-55	22.0126
chr1	141924001	141925000	hyper	2.03118e-57	5.00171e-56	33.3592
chr1	141939001	141940000	hyper	5.60068e-34	6.13251e-33	28.2576
chr1	141962001	141963000	hyper	1.98644e-25	1.49111e-24	20.2435
chr1	141965001	141966000	hyper	5.10787e-32	5.16245e-31	20.279
chr1	141977001	141978000	hyper	1.86139e-31	1.83583e-30	20.9688
chr1	141979001	141980000	hyper	3.02587e-62	8.57114e-61	28.5581
chr1	141990001	141991000	hyper	5.76142e-73	2.1723e-71	39.4519
chr1	141995001	141996000	hyper	2.24857e-74	8.80141e-73	34.9315
chr1	141997001	141998000	hyper	2.02651e-27	1.66995e-26	28.8481
chr1	141998001	141999000	hyper	2.69353e-33	2.86983e-32	23.0654
chr1	142028001	142029000	hyper	3.58951e-56	8.50711e-55	22.1777
chr1	142031001	142032000	hyper	9.01952e-85	4.58337e-83	33.6934
chr1	142033001	142034000	hyper	2.75017e-51	5.6036e-50	23.8881
chr1	142034001	142035000	hyper	3.45643e-34	3.81892e-33	23.2398
chr1	142035001	142036000	hyper	1.03633e-84	5.2583e-83	38.7217
chr1	142036001	142037000	hyper	2.12287e-166	5.45309e-164	24.9041
chr1	142055001	142056000	hypo	2.81932e-45	4.67548e-44	-39.5427
chr1	142069001	142070000	hyper	1.94891e-90	1.1267e-88	20.3995
chr1	142138001	142139000	hyper	1.05335e-81	4.96765e-80	29.241
chr1	142139001	142140000	hyper	2.62838e-36	3.15807e-35	25.676
chr1	142201001	142202000	hyper	2.90455e-110	2.60321e-108	33.4962
chr1	142202001	142203000	hyper	3.0016e-84	1.50561e-82	36.9731
chr1	142203001	142204000	hyper	8.11988e-91	4.73475e-89	35.8029
chr1	142207001	142208000	hyper	8.6548e-152	1.7375e-149	37.2082
chr1	142208001	142209000	hyper	1.9863e-36	2.39853e-35	21.8925
chr1	142209001	142210000	hyper	4.33309e-60	1.14956e-58	22.0285
chr1	142210001	142211000	hyper	5.80857e-151	1.15397e-148	37.1892
chr1	142316001	142317000	hyper	9.18405e-43	1.39604e-41	23.9379
chr1	142386001	142387000	hyper	1.64661e-67	5.38797e-66	29.4026
chr1	142416001	142417000	hyper	3.50123e-53	7.57079e-52	27.9281
chr1	142417001	142418000	hyper	1.62403e-69	5.6016e-68	26.9646
chr1	142421001	142422000	hyper	5.3423e-38	6.84248e-37	29.5824
chr1	142428001	142429000	hyper	7.27579e-38	9.27995e-37	26.7677
chr1	142448001	142449000	hyper	4.48596e-36	5.34265e-35	27.5845
chr1	142465001	142466000	hypo	4.73434e-40	6.52682e-39	-24.2749
chr1	142496001	142497000	hypo	3.70465e-30	3.45166e-29	-27.4524
chr1	142509001	142510000	hyper	5.0228e-54	1.11462e-52	24.4465
chr1	142546001	142547000	hyper	6.70412e-66	2.10269e-64	24.8283
chr1	142559001	142560000	hyper	1.79972e-41	2.6162e-40	22.2536
chr1	142560001	142561000	hyper	7.56918e-26	5.79707e-25	21.207
chr1	142565001	142566000	hyper	6.51184e-77	2.71535e-75	34.7408
chr1	142566001	142567000	hyper	1.42696e-49	2.74213e-48	27.5588
chr1	142567001	142568000	hyper	2.53204e-156	5.46004e-154	35.9681
chr1	142569001	142570000	hyper	2.29748e-55	5.30809e-54	28.4483
chr1	142572001	142573000	hyper	6.37149e-162	1.50306e-159	43.4314
chr1	142573001	142574000	hyper	2.24948e-66	7.14923e-65	30.8799
chr1	142574001	142575000	hyper	4.39349e-58	1.10372e-56	32.4484
chr1	142579001	142580000	hyper	1.21145e-21	7.50054e-21	20.4062
chr1	142591001	142592000	hypo	2.74304e-32	2.80527e-31	-22.8768
chr1	142622001	142623000	hypo	6.55619e-69	2.22449e-67	-32.145
chr1	142655001	142656000	hyper	1.63213e-44	2.63424e-43	29.3498
chr1	142673001	142674000	hyper	4.90535e-164	1.20779e-161	35.7398
chr1	142674001	142675000	hyper	3.49456e-175	1.03856e-172	47.4141
chr1	142675001	142676000	hyper	1.26817e-30	1.20581e-29	21.1706
chr1	142707001	142708000	hyper	1.90704e-77	8.05844e-76	27.0818
chr1	142715001	142716000	hyper	7.37994e-57	1.78624e-55	31.2701
chr1	142716001	142717000	hyper	3.29421e-47	5.85307e-46	37.8333
chr1	142717001	142718000	hyper	1.79953e-46	3.11251e-45	23.3006
chr1	142737001	142738000	hypo	6.62602e-61	1.79883e-59	-24.6418
chr1	142738001	142739000	hypo	5.62771e-36	6.67457e-35	-20.6908
chr1	142742001	142743000	hypo	8.76425e-50	1.69465e-48	-29.8612
chr1	142743001	142744000	hypo	3.45653e-142	5.84409e-140	-36.9142
chr1	142752001	142753000	hypo	1.1027e-55	2.57327e-54	-22.9849
chr1	142800001	142801000	hyper	2.67431e-55	6.16543e-54	29.2976
chr1	142826001	142827000	hyper	1.31554e-43	2.05723e-42	23.093
chr1	142828001	142829000	hyper	1.35124e-87	7.33394e-86	28.4246
chr1	142834001	142835000	hypo	4.41695e-61	1.20499e-59	-30.3054
chr1	142847001	142848000	hypo	1.58932e-55	3.68806e-54	-33.1055
chr1	142865001	142866000	hypo	1.26864e-166	3.27412e-164	-38.661
chr1	142889001	142890000	hypo	2.48054e-54	5.55204e-53	-28.3275
chr1	142890001	142891000	hyper	1.2479e-31	1.23984e-30	29.7572
chr1	142920001	142921000	hypo	1.67348e-23	1.14267e-22	-21.003
chr1	142952001	142953000	hyper	6.14125e-35	7.00557e-34	20.8409
chr1	142955001	142956000	hypo	2.50233e-47	4.46141e-46	-23.3624
chr1	142987001	142988000	hyper	5.3077e-44	8.41337e-43	23.3338
chr1	142988001	142989000	hyper	9.55071e-145	1.69229e-142	36.8718
chr1	143002001	143003000	hypo	8.23504e-90	4.70386e-88	-31.3841
chr1	143014001	143015000	hyper	1.37183e-71	4.99279e-70	25.2093
chr1	143040001	143041000	hyper	5.58206e-28	4.72035e-27	22.3159
chr1	143067001	143068000	hypo	2.4072e-49	4.59149e-48	-27.4595
chr1	143092001	143093000	hypo	3.1778e-90	1.83064e-88	-32.5304
chr1	143115001	143116000	hypo	4.09269e-34	4.50807e-33	-25.843
chr1	143132001	143133000	hyper	3.72979e-70	1.30794e-68	28.9132
chr1	143141001	143142000	hyper	1.7051e-62	4.86441e-61	27.4423
chr1	143146001	143147000	hypo	4.16021e-27	3.38211e-26	-25.6707
chr1	143164001	143165000	hyper	3.11201e-46	5.33512e-45	26.2269
chr1	143273001	143274000	hyper	3.06893e-28	2.62566e-27	23.7391
chr1	143325001	143326000	hypo	4.11899e-195	1.67217e-192	-37.7174
chr1	143329001	143330000	hypo	2.41667e-58	6.11552e-57	-25.6286
chr1	143335001	143336000	hyper	1.09728e-45	1.8457e-44	24.0037
chr1	143421001	143422000	hyper	3.142e-76	1.28624e-74	21.5956
chr1	143492001	143493000	hyper	2.51053e-43	3.89091e-42	26.8503
chr1	143497001	143498000	hypo	1.93054e-81	9.04048e-80	-28.3494
chr1	143498001	143499000	hypo	1.57347e-56	3.7702e-55	-26.994
chr1	143515001	143516000	hyper	3.71242e-88	2.04041e-86	27.0553
chr1	143521001	143522000	hyper	5.74954e-98	3.97343e-96	24.4002
chr1	143539001	143540000	hyper	2.27852e-140	3.71786e-138	32.7675
chr1	143570001	143571000	hyper	6.10557e-70	2.12883e-68	24.3093
chr1	143571001	143572000	hyper	1.40755e-126	1.77054e-124	32.963
chr1	143581001	143582000	hyper	2.43311e-41	3.51922e-40	21.0852
chr1	143624001	143625000	hyper	3.21405e-100	2.33468e-98	23.3705
chr1	143663001	143664000	hyper	4.69483e-38	6.02707e-37	22.385
chr1	143671001	143672000	hyper	4.78891e-34	5.26072e-33	21.7647
chr1	143699001	143700000	hyper	1.09198e-122	1.26759e-120	37.3326
chr1	143701001	143702000	hyper	1.27454e-87	6.92245e-86	33.5219
chr1	143708001	143709000	hyper	5.73019e-32	5.77879e-31	22.1366
chr1	143722001	143723000	hypo	7.37817e-113	6.98166e-111	-35.8443
chr1	143725001	143726000	hypo	4.84762e-166	1.24015e-163	-34.6983
chr1	143740001	143741000	hyper	7.38325e-47	1.29606e-45	21.0221
chr1	143741001	143742000	hyper	4.47256e-79	1.96656e-77	27.0657
chr1	143759001	143760000	hypo	1.22998e-123	1.4543e-121	-28.5439
chr1	143771001	143772000	hyper	3.42143e-47	6.07689e-46	26.6575
chr1	143777001	143778000	hyper	2.4465e-24	1.74199e-23	20.9779
chr1	143785001	143786000	hyper	2.09267e-73	7.98762e-72	37.2822
chr1	143786001	143787000	hyper	1.1207e-162	2.67831e-160	38.0133
chr1	143788001	143789000	hyper	4.12089e-163	9.92388e-161	37.4615
chr1	143794001	143795000	hyper	1.96335e-56	4.69185e-55	24.8186
chr1	143795001	143796000	hyper	9.72635e-66	3.03433e-64	21.8032
chr1	143796001	143797000	hyper	5.65848e-226	3.67136e-223	41.9266
chr1	143797001	143798000	hyper	4.57751e-177	1.39438e-174	36.9091
chr1	143803001	143804000	hyper	1.74308e-73	6.66771e-72	27.2517
chr1	143804001	143805000	hyper	1.07241e-63	3.1617e-62	20.4071
chr1	143807001	143808000	hyper	8.48831e-137	1.29328e-134	25.1134
chr1	143809001	143810000	hyper	1.61854e-57	3.99567e-56	23.4617
chr1	143810001	143811000	hyper	3.22906e-117	3.32952e-115	36.5681
chr1	143811001	143812000	hyper	7.10793e-41	1.01032e-39	20.9405
chr1	143812001	143813000	hyper	4.05096e-94	2.54929e-92	26.4606
chr1	143813001	143814000	hyper	3.20624e-56	7.61149e-55	25.0627
chr1	143822001	143823000	hyper	5.09227e-35	5.82575e-34	25.0731
chr1	143823001	143824000	hyper	2.53723e-60	6.77336e-59	24.1033
chr1	143851001	143852000	hyper	3.80074e-38	4.89544e-37	23.4822
chr1	143876001	143877000	hyper	2.96502e-62	8.40203e-61	26.5832
chr1	143877001	143878000	hyper	1.32256e-37	1.67148e-36	23.1262
chr1	143881001	143882000	hyper	9.39664e-52	1.94254e-50	26.5409
chr1	143888001	143889000	hyper	3.38606e-64	1.01166e-62	22.9933
chr1	143893001	143894000	hyper	2.15037e-69	7.39148e-68	24.7517
chr1	143944001	143945000	hypo	2.01603e-76	8.29243e-75	-34.4803
chr1	143945001	143946000	hyper	4.00825e-42	5.95434e-41	26.3792
chr1	143949001	143950000	hyper	5.75453e-68	1.90167e-66	22.5774
chr1	143957001	143958000	hyper	5.29662e-92	3.18227e-90	24.5817
chr1	143974001	143975000	hypo	2.23365e-45	3.71587e-44	-26.1774
chr1	143984001	143985000	hyper	4.00298e-74	1.55811e-72	28.7454
chr1	143985001	143986000	hyper	0	0	42.2206
chr1	144095001	144096000	hypo	2.90248e-190	1.07953e-187	-34.0512
chr1	144112001	144113000	hyper	2.29264e-41	3.31966e-40	25.2132
chr1	144125001	144126000	hypo	7.87425e-96	5.17784e-94	-29.2588
chr1	144165001	144166000	hypo	7.65418e-55	1.74104e-53	-23.1931
chr1	144167001	144168000	hyper	4.53636e-78	1.9461e-76	31.3123
chr1	144168001	144169000	hyper	1.38621e-114	1.35582e-112	24.46
chr1	144172001	144173000	hypo	7.24784e-119	7.74609e-117	-35.2987
chr1	144173001	144174000	hypo	1.62317e-153	3.35049e-151	-40.8285
chr1	144177001	144178000	hyper	5.83761e-72	2.14487e-70	23.0424
chr1	144182001	144183000	hyper	2.61797e-59	6.79883e-58	25.8816
chr1	144192001	144193000	hyper	3.80949e-43	5.86415e-42	22.5973
chr1	144194001	144195000	hyper	1.97896e-30	1.86578e-29	20.831
chr1	144195001	144196000	hyper	6.50566e-100	4.69311e-98	33.9405
chr1	144197001	144198000	hyper	1.00688e-29	9.20771e-29	21.8155
chr1	144198001	144199000	hyper	1.99964e-95	1.30184e-93	39.8121
chr1	144201001	144202000	hyper	2.06584e-39	2.78387e-38	20.0429
chr1	144223001	144224000	hyper	9.31342e-141	1.53334e-138	35.0935
chr1	144226001	144227000	hyper	4.19667e-99	2.97611e-97	21.8235
chr1	144238001	144239000	hyper	4.21643e-84	2.10632e-82	24.0145
chr1	144337001	144338000	hyper	1.74188e-43	2.71206e-42	24.7292
chr1	144338001	144339000	hyper	1.73329e-80	7.92665e-79	28.233
chr1	144360001	144361000	hypo	3.91956e-44	6.2425e-43	-22.7454
chr1	144377001	144378000	hypo	1.07544e-54	2.43438e-53	-20.2285
chr1	144431001	144432000	hyper	4.27948e-79	1.88317e-77	23.6634
chr1	144435001	144436000	hyper	1.85565e-51	3.80461e-50	22.9045
chr1	144452001	144453000	hyper	6.31868e-163	1.51999e-160	38.8326
chr1	144458001	144459000	hyper	2.13255e-85	1.09971e-83	29.8341
chr1	144459001	144460000	hyper	3.07699e-141	5.11574e-139	36.0419
chr1	144468001	144469000	hypo	9.02144e-20	5.03335e-19	-21.0649
chr1	144528001	144529000	hyper	2.43876e-62	6.92637e-61	28.3729
chr1	144542001	144543000	hyper	1.94327e-69	6.688e-68	25.5949
chr1	144547001	144548000	hyper	2.71979e-23	1.83751e-22	20.6685
chr1	144564001	144565000	hyper	3.79839e-14	1.47416e-13	20.778
chr1	144579001	144580000	hyper	2.3212e-66	7.37288e-65	28.0158
chr1	144593001	144594000	hyper	1.54427e-37	1.94697e-36	24.0935
chr1	144597001	144598000	hyper	4.38996e-84	2.1925e-82	33.1288
chr1	144613001	144614000	hyper	1.31719e-41	1.92258e-40	26.3435
chr1	144640001	144641000	hyper	1.25325e-74	4.93763e-73	23.7213
chr1	144656001	144657000	hyper	3.90578e-206	1.87091e-203	39.5992
chr1	144670001	144671000	hyper	3.39552e-53	7.34402e-52	24.6261
chr1	144672001	144673000	hyper	3.85138e-116	3.88815e-114	28.7493
chr1	144673001	144674000	hyper	4.49433e-133	6.41584e-131	33.5278
chr1	144675001	144676000	hyper	3.76543e-38	4.85081e-37	23.5148
chr1	144678001	144679000	hyper	7.11677e-49	1.33467e-47	20.0416
chr1	144695001	144696000	hyper	1.22697e-213	6.6537e-211	27.0122
chr1	144712001	144713000	hyper	3.16698e-59	8.21051e-58	28.6566
chr1	144726001	144727000	hyper	5.09316e-126	6.33585e-124	31.793
chr1	144727001	144728000	hyper	8.44598e-62	2.35835e-60	24.952
chr1	144728001	144729000	hyper	1.15444e-71	4.20962e-70	23.8514
chr1	144762001	144763000	hyper	0	0	39.6093
chr1	144763001	144764000	hyper	0	0	41.9497
chr1	144764001	144765000	hyper	3.99229e-37	4.95417e-36	22.6431
chr1	144775001	144776000	hyper	1.44388e-31	1.43028e-30	20.4429
chr1	144777001	144778000	hyper	2.46058e-56	5.86318e-55	23.1613
chr1	144779001	144780000	hypo	1.38462e-54	3.12393e-53	-22.1566
chr1	144784001	144785000	hyper	4.10914e-202	1.87042e-199	38.925
chr1	144788001	144789000	hypo	7.30306e-216	4.09171e-213	-34.6904
chr1	144808001	144809000	hyper	8.92236e-35	1.01088e-33	23.6955
chr1	144844001	144845000	hyper	7.55544e-45	1.23493e-43	27.7492
chr1	144894001	144895000	hyper	1.0329e-49	1.9923e-48	35.3484
chr1	144907001	144908000	hyper	2.06691e-102	1.57841e-100	38.9632
chr1	144912001	144913000	hyper	2.57888e-72	9.55934e-71	26.8274
chr1	144962001	144963000	hyper	3.77014e-121	4.23325e-119	26.5491
chr1	144982001	144983000	hyper	2.04599e-92	1.24079e-90	24.466
chr1	145000001	145001000	hyper	9.17801e-109	8.00055e-107	26.8829
chr1	145011001	145012000	hyper	1.72396e-27	1.42527e-26	22.5612
chr1	145041001	145042000	hypo	3.44078e-56	8.15956e-55	-29.5649
chr1	145083001	145084000	hyper	2.64028e-35	3.05399e-34	20.7597
chr1	145095001	145096000	hypo	5.57412e-78	2.38594e-76	-20.804
chr1	145120001	145121000	hyper	5.53846e-132	7.7207e-130	33.2842
chr1	145122001	145123000	hyper	6.87267e-37	8.45094e-36	20.1134
chr1	145159001	145160000	hyper	1.26233e-51	2.60077e-50	20.7132
chr1	145172001	145173000	hyper	4.48736e-145	7.98336e-143	35.8186
chr1	145176001	145177000	hyper	4.72674e-50	9.22897e-49	24.4273
chr1	145209001	145210000	hyper	1.1788e-56	2.83519e-55	20.957
chr1	145228001	145229000	hyper	2.75272e-79	1.21984e-77	20.957
chr1	145233001	145234000	hyper	8.19879e-50	1.58713e-48	22.9437
chr1	145239001	145240000	hyper	3.20305e-49	6.08197e-48	20.3498
chr1	145244001	145245000	hyper	1.30833e-194	5.26754e-192	31.1387
chr1	145319001	145320000	hyper	1.93164e-59	5.03818e-58	22.7312
chr1	145348001	145349000	hyper	4.50498e-28	3.82612e-27	22.2988
chr1	145355001	145356000	hyper	7.18212e-79	3.14408e-77	25.6592
chr1	145356001	145357000	hyper	5.02904e-189	1.83932e-186	36.036
chr1	145370001	145371000	hyper	1.84831e-63	5.41794e-62	23.6805
chr1	145377001	145378000	hyper	1.09891e-34	1.2403e-33	25.4679
chr1	145378001	145379000	hyper	6.58111e-67	2.12292e-65	29.3105
chr1	145386001	145387000	hyper	9.28635e-88	5.0615e-86	29.7673
chr1	145436001	145437000	hyper	6.46739e-43	9.88216e-42	20.2981
chr1	145490001	145491000	hyper	9.42107e-74	3.62845e-72	27.3639
chr1	145491001	145492000	hyper	1.22125e-64	3.69803e-63	21.0484
chr1	145588001	145589000	hyper	3.65587e-29	3.25896e-28	26.0106
chr1	145619001	145620000	hyper	2.11001e-107	1.79063e-105	24.0911
chr1	145663001	145664000	hyper	1.59264e-49	3.05518e-48	25.594
chr1	145664001	145665000	hyper	4.92804e-85	2.51851e-83	33.1466
chr1	145895001	145896000	hyper	1.72176e-62	4.91128e-61	25.9105
chr1	145916001	145917000	hyper	9.22001e-52	1.90674e-50	20.4472
chr1	145934001	145935000	hyper	3.48286e-28	2.97314e-27	24.9086
chr1	146015001	146016000	hyper	1.97021e-105	1.60442e-103	33.3706
chr1	146063001	146064000	hyper	1.53026e-125	1.88073e-123	27.5641
chr1	146097001	146098000	hypo	4.01479e-72	1.4817e-70	-20.4166
chr1	146140001	146141000	hyper	1.28216e-12	4.42173e-12	21.874
chr1	146192001	146193000	hyper	1.05513e-28	9.21357e-28	21.4113
chr1	146193001	146194000	hyper	2.15504e-48	3.97551e-47	29.2982
chr1	146259001	146260000	hyper	5.40685e-61	1.47067e-59	29.7516
chr1	146260001	146261000	hyper	6.85913e-68	2.26278e-66	29.6607
chr1	146262001	146263000	hyper	1.37705e-49	2.64715e-48	32.6534
chr1	146263001	146264000	hypo	3.55512e-197	1.50154e-194	-29.1376
chr1	146264001	146265000	hypo	6.88433e-97	4.62947e-95	-20.8685
chr1	146278001	146279000	hyper	5.02593e-57	1.22274e-55	32.3376
chr1	146292001	146293000	hyper	2.07521e-21	1.26841e-20	21.5669
chr1	146293001	146294000	hyper	3.01993e-158	6.71654e-156	39.1028
chr1	146346001	146347000	hyper	2.14367e-36	2.58536e-35	20.7722
chr1	146354001	146355000	hyper	1.78149e-25	1.34001e-24	21.3642
chr1	146415001	146416000	hyper	2.651e-48	4.87835e-47	35.9512
chr1	146427001	146428000	hyper	4.23898e-29	3.76692e-28	22.6572
chr1	146511001	146512000	hypo	3.94226e-33	4.17115e-32	-23.5429
chr1	146514001	146515000	hyper	1.22063e-50	2.43071e-49	20.7805
chr1	146770001	146771000	hyper	3.08975e-25	2.29841e-24	21.2734
chr1	146771001	146772000	hyper	3.84329e-48	7.03467e-47	25.0415
[truncated: 56,967 more rows]

## Sheet: TableS6B_anno_summary
Table S6B count of differentially methylated regions overlapping with different genomic regions
annot.type	total DMR	hyper-DMR	hypo-DMR
Btaurus_custom_3UTR	1055	847	208
Btaurus_custom_5UTR	787	582	205
Btaurus_custom_CDS	4614	3684	930
Btaurus_custom_CpG-deserts	46418	37079	9339
Btaurus_custom_CpG-islands	2949	2456	493
Btaurus_custom_CpG-shelves	7371	5851	1520
Btaurus_custom_CpG-shores	9901	8107	1794
Btaurus_custom_downstream	1976	1564	412
Btaurus_custom_exons	5316	4222	1094
Btaurus_custom_genes	19927	15625	4302
Btaurus_custom_inter	40180	32548	7632
Btaurus_custom_introns	19218	15070	4148
Btaurus_custom_promoters	1733	1300	433
Btaurus_custom_QTLs-immune-capacity	1		1
Btaurus_custom_QTLs-mastitis	41	29	12
Btaurus_custom_repeats	48263	38387	9876
Btaurus_custom_transcripts	19987	15675	4312
Btaurus_custom_TSS	589	413	176

## Sheet: TableS6C_chr
Table S6C count of differentially methylated regions per chromosome
chromosome	hyper-DMR	hypo-DMR	total-DMR
chr19	2426	636	3062
chr11	2383	649	3032
chr5	2261	556	2817
chr3	2208	550	2758
chr13	2125	519	2644
chr7	2090	503	2593
chr18	1954	473	2427
chr2	1905	480	2385
chr1	1844	505	2349
chr10	1830	443	2273
chr16	1833	429	2262
chr8	1696	417	2113
chr22	1592	453	2045
chr17	1637	375	2012
chr4	1575	339	1914
chr25	1548	343	1891
chr15	1506	358	1864
chr23	1413	446	1859
chr21	1400	386	1786
chr14	1476	304	1780
chr9	1370	387	1757
chr6	1340	320	1660
chr12	1242	305	1547
chr26	1229	271	1500
chr29	1227	249	1476
chr24	1162	266	1428
chr20	1135	237	1372
chr27	825	188	1013
chr28	798	194	992
chrX	260	67	327
scafold	22	5	27
