# Supplementary material for: Genome-Wide DNA Methylation and Transcriptome Integration Associates DNA Methylation Changes with Bovine Subclinical Mastitis Caused by Staphylococcus chromogenes
Source: Int J Mol Sci. 2023 Jun 20;24(12):10369. doi: 10.3390/ijms241210369 (PMC10299661; doi:10.3390/ijms241210369)
Supplement: Supplementary file 1 [file ijms-24-10369-s001.zip › TableS7 The distribution of DMCs in genes and the functional enrichment for genes that harbored DMCs.xlsx]

## Sheet: TableS7A_gene_harbor_CpG-DMC
Table S7A The distribution of DMCs in the context of CpG in genes
symbol	hyper	hypo	num_dmc	anno.width	gene.feature
20ALPHA-HSD	3	0	3	17323	genes
A1BG	13	0	13	4163	genes
A2M	20	4	24	48449	genes
A2ML1	23	2	25	50137	genes
A4GNT	4	0	4	4646	genes
AAAS	1	7	8	16024	genes
AACS	176	26	202	52988	genes
AADAC	8	0	8	16414	genes
AADAT	2	2	4	23810	genes
AAGAB	74	21	95	73046	genes
AAMDC	8	4	12	33561	genes
AAMP	0	1	1	4903	genes
AAR2	13	2	15	20160	genes
AARS1	16	3	19	21277	genes
AARS2	11	5	16	10985	genes
AARSD1	18	4	22	17803	genes
AASDHPPT	14	5	19	26861	genes
AASS	3	5	8	72058	genes
ABAT	112	8	120	89897	genes
ABCA1	46	40	86	115980	genes
ABCA12	56	8	64	199564	genes
ABCA3	21	20	41	31472	genes
ABCA4	94	24	118	143912	genes
ABCA7	149	0	149	16648	genes
ABCA9	98	17	115	52192	genes
ABCB11	61	4	65	81882	genes
ABCB6	3	0	3	7631	genes
ABCB7	6	1	7	158626	genes
ABCB9	101	8	109	23596	genes
ABCC1	115	120	235	150264	genes
ABCC3	71	32	103	48026	genes
ABCC5	7	0	7	27899	genes
ABCC6	68	22	90	66230	genes
ABCC8	112	14	126	79017	genes
ABCD1	24	7	31	15817	genes
ABCD2	1	1	2	2816	genes
ABCD3	30	8	38	89395	genes
ABCD4	28	4	32	16038	genes
ABCE1	7	5	12	30849	genes
ABCF1	13	11	24	13153	genes
ABCF2	8	2	10	14687	genes
ABCF3	1	3	4	7844	genes
ABCG1	77	49	126	63046	genes
ABCG2	51	13	64	71051	genes
ABCG4	23	10	33	14458	genes
ABCG5	11	0	11	32177	genes
ABCG8	28	1	29	17683	genes
ABHD1	0	4	4	6959	genes
ABHD10	3	0	3	13138	genes
ABHD11	25	0	25	2398	genes
ABHD12	151	47	198	53575	genes
ABHD13	14	23	37	13978	genes
ABHD14B	34	1	35	3646	genes
ABHD15	2	25	27	4977	genes
ABHD16A	25	0	25	12281	genes
ABHD16B	18	0	18	1685	genes
ABHD17A	102	1	103	8215	genes
ABHD17B	31	8	39	48608	genes
ABHD17C	38	3	41	54632	genes
ABHD18	2	5	7	26545	genes
ABHD2	116	100	216	108114	genes
ABHD3	27	15	42	49666	genes
ABHD4	5	4	9	12264	genes
ABHD5	9	34	43	41444	genes
ABHD6	35	29	64	48297	genes
ABHD8	22	3	25	6958	genes
ABI1	123	23	146	82919	genes
ABI2	13	25	38	97578	genes
ABI3	7	35	42	9234	genes
ABITRAM	3	0	3	6503	genes
ABL1	183	44	227	141677	genes
ABL2	55	13	68	95633	genes
ABLIM3	87	9	96	135391	genes
ABO	103	5	108	37884	genes
ABR	179	131	310	144093	genes
ABRA	1	2	3	10815	genes
ABRACL	3	6	9	15040	genes
ABRAXAS1	2	0	2	17200	genes
ABRAXAS2	23	41	64	28816	genes
ABT1	3	2	5	2953	genes
ABTB1	24	38	62	4659	genes
ACAA1	67	25	92	24222	genes
ACAA2	16	4	20	34951	genes
ACACA	362	39	401	240943	genes
ACACB	83	50	133	115072	genes
ACAD10	22	2	24	47747	genes
ACAD11	24	26	50	119037	genes
ACAD8	9	31	40	13807	genes
ACAD9	71	33	104	47629	genes
ACADL	5	3	8	40132	genes
ACADM	4	0	4	38344	genes
ACADS	7	15	22	16472	genes
ACADSB	43	0	43	49924	genes
ACADVL	10	0	10	5157	genes
ACAN	59	5	64	68680	genes
ACAP1	51	42	93	11646	genes
ACAP2	21	17	38	113953	genes
ACAP3	38	10	48	14290	genes
ACAT1	11	3	14	29052	genes
ACAT2	12	4	16	15463	genes
ACBD3	22	31	53	38486	genes
ACBD4	40	1	41	6589	genes
ACBD5	22	7	29	28339	genes
ACBD6	36	52	88	194447	genes
ACBD7	3	1	4	6457	genes
ACCS	12	2	14	20960	genes
ACE	74	6	80	20607	genes
ACE2	6	3	9	49101	genes
ACER1	21	3	24	23188	genes
ACER2	10	16	26	26859	genes
ACER3	39	4	43	157020	genes
ACHE	2	0	2	4515	genes
ACKR1	2	0	2	1440	genes
ACKR2	0	3	3	7476	genes
ACKR3	19	1	20	12222	genes
ACLY	48	20	68	44265	genes
ACMSD	31	3	34	60969	genes
ACO1	77	27	104	62932	genes
ACO2	175	15	190	49047	genes
ACOT11	29	16	45	36085	genes
ACOT12	6	2	8	40254	genes
ACOT13	16	0	16	13672	genes
ACOT2	1	0	1	7528	genes
ACOT4	0	1	1	4284	genes
ACOT7	174	57	231	107803	genes
ACOT8	8	12	20	11969	genes
ACOT9	4	0	4	29176	genes
ACOX1	34	14	48	20259	genes
ACOX2	137	1	138	30779	genes
ACOX3	78	7	85	49371	genes
ACP1	42	0	42	14358	genes
ACP2	65	44	109	7264	genes
ACP3	10	4	14	35989	genes
ACP4	8	0	8	5111	genes
ACP5	30	1	31	3636	genes
ACP6	2	11	13	20909	genes
ACP7	21	2	23	13680	genes
ACR	4	1	5	7408	genes
ACRV1	3	1	4	6510	genes
ACSBG1	50	17	67	59198	genes
ACSF2	123	19	142	31503	genes
ACSF3	19	1	20	38634	genes
ACSL1	287	4	291	64883	genes
ACSL3	50	16	66	75946	genes
ACSL5	19	36	55	51370	genes
ACSL6	73	44	117	57256	genes
ACSM1	25	15	40	64278	genes
ACSM2B	13	8	21	48825	genes
ACSS1	239	19	258	44242	genes
ACSS2	75	11	86	46793	genes
ACSS3	57	9	66	174259	genes
ACTA1	1	0	1	2757	genes
ACTA2	25	8	33	17286	genes
ACTB	107	0	107	3414	genes
ACTC1	4	0	4	5278	genes
ACTG1	47	0	47	2850	genes
ACTG2	5	4	9	24144	genes
ACTL6A	5	3	8	31418	genes
ACTL6B	12	0	12	10114	genes
ACTL7A	2	0	2	1521	genes
ACTL7B	1	0	1	1407	genes
ACTL9	3	0	3	1441	genes
ACTN1	253	96	349	98077	genes
ACTN2	69	7	76	78677	genes
ACTN3	23	0	23	11777	genes
ACTN4	655	126	781	72992	genes
ACTR10	7	4	11	26525	genes
ACTR1A	31	0	31	16333	genes
ACTR1B	4	0	4	9675	genes
ACTR2	26	22	48	37668	genes
ACTR3	20	8	28	47408	genes
ACTR6	13	4	17	19274	genes
ACTR8	7	2	9	15312	genes
ACTRT3	2	0	2	1936	genes
ACVR1	108	18	126	73613	genes
ACVR1C	24	2	26	77790	genes
ACVR2A	46	7	53	94990	genes
ACVR2B	52	38	90	29789	genes
ACVRL1	15	1	16	8898	genes
ACY1	17	1	18	4858	genes
ACYP1	7	0	7	6284	genes
ACYP2	16	11	27	179229	genes
ADA	23	6	29	23453	genes
ADAL	4	7	11	15892	genes
ADAM10	68	4	72	144137	genes
ADAM12	271	95	366	390084	genes
ADAM15	35	3	38	10146	genes
ADAM1B	3	2	5	24601	genes
ADAM2	14	1	15	100513	genes
ADAM22	53	11	64	231541	genes
ADAM23	116	47	163	195286	genes
ADAM32	26	1	27	173988	genes
ADAM3A	14	4	18	114179	genes
ADAM9	38	3	41	90198	genes
ADAMDEC1	13	1	14	25440	genes
ADAMTS1	27	2	29	8684	genes
ADAMTS10	19	5	24	17536	genes
ADAMTS12	213	43	256	390694	genes
ADAMTS14	150	31	181	93385	genes
ADAMTS15	25	4	29	22115	genes
ADAMTS18	147	19	166	143578	genes
ADAMTS19	87	18	105	267906	genes
ADAMTS2	418	76	494	245248	genes
ADAMTS20	39	8	47	215680	genes
ADAMTS3	101	34	135	278183	genes
ADAMTS4	22	9	31	8057	genes
ADAMTS5	20	14	34	49617	genes
ADAMTS6	28	16	44	275516	genes
ADAMTS8	70	0	70	17624	genes
ADAMTS9	73	5	78	162359	genes
ADAMTSL2	130	3	133	31121	genes
ADAMTSL4	21	14	35	10874	genes
ADAP1	272	53	325	32893	genes
ADAP2	12	72	84	25940	genes
ADARB2	444	45	489	232991	genes
ADAT1	8	14	22	16063	genes
ADAT2	3	2	5	26446	genes
ADCK1	79	61	140	131116	genes
ADCK2	22	11	33	14197	genes
ADCK5	48	8	56	13591	genes
ADCY1	89	2	91	99668	genes
ADCY3	32	20	52	82689	genes
ADCY4	21	9	30	14819	genes
ADCY5	149	30	179	156767	genes
ADCY6	181	0	181	15533	genes
ADCY7	98	82	180	64719	genes
ADCY8	151	30	181	225164	genes
ADCY9	154	29	183	101836	genes
ADCYAP1R1	89	6	95	58076	genes
ADD1	107	50	157	89791	genes
ADD2	14	3	17	57194	genes
ADD3	81	72	153	130899	genes
ADGB	63	9	72	194553	genes
ADGRA1	107	28	135	34646	genes
ADGRB1	237	2	239	64986	genes
ADGRD1	195	27	222	175198	genes
ADGRE5	41	29	70	17288	genes
ADGRF1	13	6	19	44627	genes
ADGRF2	19	1	20	23857	genes
ADGRF4	4	0	4	12796	genes
ADGRF5	53	33	86	75441	genes
ADGRG1	14	9	23	26065	genes
ADGRG5	33	16	49	26107	genes
ADGRG7	18	1	19	63263	genes
ADGRL1	37	21	58	47482	genes
ADGRL2	124	100	224	710492	genes
ADGRL3	48	56	104	576600	genes
ADGRL4	8	7	15	140907	genes
ADH1C	9	0	9	20643	genes
ADH4	9	1	10	32262	genes
ADH5	1	9	10	14868	genes
ADH6	20	4	24	16561	genes
ADH6	20	4	24	15569	genes
ADHFE1	20	14	34	32981	genes
ADI1	29	0	29	6326	genes
ADIG	23	2	25	9677	genes
ADIPOR1	29	81	110	13505	genes
ADIPOR2	22	22	44	19552	genes
ADIRF	13	0	13	2245	genes
ADK	150	53	203	517719	genes
ADM	1	0	1	2284	genes
ADM2	5	0	5	1148	genes
ADNCR	5	0	5	6266	genes
ADNP	102	2	104	31076	genes
ADNP2	23	0	23	31897	genes
ADORA1	27	22	49	40752	genes
ADORA2B	120	26	146	20548	genes
ADORA3	2	6	8	3875	genes
ADPGK	36	10	46	32620	genes
ADPRH	4	0	4	6763	genes
ADPRHL1	139	0	139	12996	genes
ADPRS	5	1	6	5689	genes
ADRA1A	32	31	63	104615	genes
ADRA1B	27	11	38	61012	genes
ADRA1D	7	3	10	21223	genes
ADRA2A	104	0	104	1362	genes
ADRA2B	11	0	11	1344	genes
ADRB1	10	0	10	1404	genes
ADRB2	2	4	6	2030	genes
ADRB3	0	5	5	2687	genes
ADRM1	52	0	52	5737	genes
ADSL	51	2	53	16673	genes
ADSS	13	15	28	32457	genes
ADSS1	123	1	124	16004	genes
ADTRP	60	71	131	67488	genes
AEBP2	27	32	59	61721	genes
AFAP1	207	86	293	149674	genes
AFAP1L1	36	24	60	74806	genes
AFAP1L2	245	25	270	116671	genes
AFF1	292	101	393	137145	genes
AFF2	175	26	201	534044	genes
AFF4	38	0	38	79154	genes
AFG1L	39	7	46	196011	genes
AFG3L2	10	5	15	18985	genes
AFM	4	0	4	20969	genes
AFMID	37	7	44	22466	genes
AFP	1	0	1	21548	genes
AGA	8	3	11	11363	genes
AGAP2	141	1	142	11458	genes
AGBL3	19	12	31	99579	genes
AGBL5	2	18	20	7426	genes
AGER	3	0	3	3100	genes
AGFG1	19	19	38	74639	genes
AGFG2	45	34	79	19885	genes
AGGF1	9	1	10	46344	genes
AGK	26	16	42	100669	genes
AGL	12	3	15	79368	genes
AGMO	56	25	81	389432	genes
AGO1	48	5	53	36397	genes
AGO2	395	31	426	82117	genes
AGO3	17	12	29	120686	genes
AGPAT1	30	4	34	7474	genes
AGPAT2	131	7	138	12372	genes
AGPAT3	16	14	30	29023	genes
AGPAT4	88	77	165	135848	genes
AGPAT5	19	14	33	47647	genes
AGPS	42	28	70	126963	genes
AGR2	10	1	11	13447	genes
AGR3	1	0	1	16592	genes
AGRP	1	0	1	751	genes
AGT	42	4	46	8838	genes
AGTR1	31	14	45	55572	genes
AGTRAP	6	11	17	18974	genes
AGXT	3	0	3	10623	genes
AGXT2	7	3	10	42706	genes
AHCTF1	12	6	18	79074	genes
AHCY	12	11	23	15717	genes
AHCYL1	25	7	32	41029	genes
AHCYL2	97	42	139	191160	genes
AHDC1	71	17	88	21336	genes
AHR	20	15	35	50106	genes
AHRR	150	2	152	66040	genes
AHSA1	0	1	1	7461	genes
AHSA2	9	2	11	22306	genes
AHSG	17	2	19	6914	genes
AHSP	1	0	1	900	genes
AICDA	6	0	6	10815	genes
AIDA	4	7	11	46343	genes
AIF1	0	4	4	2277	genes
AIF1L	130	9	139	25143	genes
AIFM1	26	1	27	30782	genes
AIFM2	38	9	47	17378	genes
AIFM3	87	9	96	10808	genes
AIG1	66	24	90	269587	genes
AIMP1	4	0	4	27454	genes
AIMP2	19	11	30	8125	genes
AIP	15	14	29	6076	genes
AIPL1	12	3	15	9384	genes
AJAP1	62	4	66	80915	genes
AJUBA	32	1	33	8702	genes
AK1	31	1	32	9611	genes
AK2	41	13	54	23599	genes
AK3	5	5	10	21904	genes
AK4	50	37	87	90686	genes
AK5	80	11	91	258825	genes
AK7	38	37	75	68187	genes
AK8	162	79	241	135808	genes
AKAP10	35	11	46	43301	genes
AKAP2	59	18	77	44822	genes
AKAP3	12	0	12	24333	genes
AKAP4	3	0	3	17777	genes
AKAP5	2	0	2	1287	genes
AKAP6	153	47	200	498178	genes
AKAP7	21	28	49	122535	genes
AKAP8	42	8	50	18008	genes
AKIP1	29	0	29	7494	genes
AKIRIN1	22	0	22	12166	genes
AKIRIN2	22	2	24	22844	genes
AKR1A1	6	2	8	11736	genes
AKR1B1	11	0	11	16805	genes
AKR1B10	3	2	5	22005	genes
AKR1C3	14	1	15	8921	genes
AKR1C4	10	1	11	9810	genes
AKR1D1	10	0	10	50649	genes
AKR7A2	8	5	13	6338	genes
AKT1	143	11	154	16865	genes
AKT1S1	18	0	18	7497	genes
AKT2	251	0	251	30041	genes
AKT3	72	57	129	265675	genes
AKTIP	16	33	49	9556	genes
ALAD	36	4	40	9912	genes
ALAS1	26	15	41	14050	genes
ALB	13	0	13	18370	genes
ALCAM	72	21	93	226566	genes
ALDH16A1	13	3	16	14456	genes
ALDH18A1	3	6	9	41117	genes
ALDH1A1	34	2	36	53479	genes
ALDH1L1	19	0	19	27834	genes
ALDH1L2	20	7	27	60790	genes
ALDH2	139	52	191	25725	genes
ALDH3A1	11	0	11	6031	genes
ALDH3A2	49	13	62	15995	genes
ALDH3B1	38	14	52	14889	genes
ALDH4A1	61	47	108	33371	genes
ALDH5A1	19	12	31	25769	genes
ALDH6A1	24	2	26	17706	genes
ALDH7A1	30	0	30	37516	genes
ALDH8A1	21	3	24	24569	genes
ALDH9A1	9	3	12	29051	genes
ALDOA	23	14	37	4717	genes
ALDOB	6	3	9	15401	genes
ALDOC	14	0	14	3501	genes
ALG1	20	0	20	14925	genes
ALG10	1	1	2	6241	genes
ALG12	65	8	73	8865	genes
ALG14	113	32	145	98146	genes
ALG2	6	1	7	4375	genes
ALG3	1	0	1	5327	genes
ALG5	5	4	9	26117	genes
ALG6	11	14	25	58600	genes
ALG8	14	2	16	28059	genes
ALKBH1	4	2	6	23182	genes
ALKBH2	31	0	31	5775	genes
ALKBH3	20	19	39	41050	genes
ALKBH4	11	0	11	7443	genes
ALKBH5	56	6	62	17204	genes
ALKBH6	6	0	6	5755	genes
ALKBH8	10	3	13	125235	genes
ALLC	14	0	14	23538	genes
ALOX12	19	10	29	13134	genes
ALOX12B	4	1	5	11499	genes
ALOX12E	7	1	8	8833	genes
ALOX15	14	2	16	8577	genes
ALOX15B	10	0	10	8811	genes
ALOX5	58	71	129	46244	genes
ALOX5AP	10	37	47	22816	genes
ALPI	0	2	2	3256	genes
ALPK2	120	106	226	128482	genes
ALPL	163	93	256	63589	genes
ALS2CL	85	8	93	22150	genes
ALX1	6	1	7	21846	genes
ALX3	2	6	8	9278	genes
ALX4	37	12	49	44591	genes
ALYREF	10	0	10	3785	genes
AMBN	7	0	7	11307	genes
AMBP	21	3	24	12155	genes
AMBRA1	359	74	433	172574	genes
AMD1	11	3	14	21309	genes
AMDHD1	8	2	10	14717	genes
AMDHD2	45	3	48	6684	genes
AMFR	26	22	48	45512	genes
AMH	35	0	35	2866	genes
AMHR2	10	0	10	6228	genes
AMIGO1	11	0	11	5495	genes
AMIGO2	0	8	8	3313	genes
AMMECR1L	30	40	70	18277	genes
AMN	27	9	36	10605	genes
AMN1	13	1	14	85438	genes
AMOT	2	1	3	47015	genes
AMPD1	12	2	14	22375	genes
AMPD2	36	10	46	11952	genes
AMPH	58	12	70	211692	genes
AMT	42	0	42	4327	genes
AMTN	2	2	4	13268	genes
AMY2B	2	1	3	22649	genes
AMZ2	7	9	16	7827	genes
ANAPC10	18	19	37	81169	genes
ANAPC11	18	0	18	5188	genes
ANAPC13	8	1	9	5655	genes
ANAPC15	5	0	5	3183	genes
ANAPC16	13	5	18	10263	genes
ANAPC4	8	1	9	33114	genes
ANAPC5	29	18	47	35089	genes
ANAPC7	10	29	39	20671	genes
ANCV1R	1	0	1	972	genes
ANG	39	5	44	16574	genes
ANG2	38	5	43	11839	genes
ANGEL2	9	2	11	18066	genes
ANGPT1	65	31	96	301196	genes
ANGPT2	59	40	99	57758	genes
ANGPT4	36	20	56	43744	genes
ANGPTL1	3	11	14	24192	genes
ANGPTL2	125	4	129	22644	genes
ANGPTL3	6	0	6	9346	genes
ANGPTL4	28	2	30	7071	genes
ANGPTL5	1	0	1	17043	genes
ANGPTL6	5	0	5	3801	genes
ANGPTL7	2	0	2	6085	genes
ANK3	41	9	50	118423	genes
ANKH	186	13	199	169973	genes
ANKIB1	20	12	32	101449	genes
ANKMY2	41	1	42	39549	genes
ANKRA2	4	1	5	10341	genes
ANKRD1	16	0	16	9372	genes
ANKRD10	98	7	105	27663	genes
ANKRD13A	21	35	56	34163	genes
ANKRD13B	26	19	45	16198	genes
ANKRD13C	1	0	1	2336	genes
ANKRD13D	34	2	36	11318	genes
ANKRD16	8	13	21	13667	genes
ANKRD17	37	8	45	167098	genes
ANKRD22	31	5	36	27277	genes
ANKRD26	17	15	32	67760	genes
ANKRD27	52	61	113	60339	genes
ANKRD28	60	70	130	134664	genes
ANKRD29	36	48	84	47757	genes
ANKRD33B	161	192	353	95024	genes
ANKRD34B	7	0	7	17586	genes
ANKRD34C	6	2	8	6043	genes
ANKRD35	8	6	14	16600	genes
ANKRD37	22	0	22	2616	genes
ANKRD39	45	4	49	7238	genes
ANKRD40	3	6	9	19521	genes
ANKRD40CL	20	1	21	6121	genes
ANKRD46	11	10	21	41238	genes
ANKRD50	5	2	7	36249	genes
ANKRD52	9	2	11	11737	genes
ANKRD54	8	3	11	10616	genes
ANKRD55	99	50	149	109849	genes
ANKRD6	18	16	34	62380	genes
ANKRD61	6	2	8	3795	genes
ANKRD65	13	1	14	2938	genes
ANKRD9	12	0	12	3093	genes
ANKS3	67	15	82	14640	genes
ANKS4B	21	0	21	11383	genes
ANKZF1	3	5	8	6481	genes
ANO1	227	26	253	94722	genes
ANO10	65	74	139	227916	genes
ANO3	154	43	197	287642	genes
ANO4	137	20	157	349285	genes
ANO5	21	0	21	85342	genes
ANP32A	55	25	80	38911	genes
ANP32B	17	10	27	23850	genes
ANP32E	3	3	6	12074	genes
ANPEP	15	1	16	17008	genes
ANTKMT	19	0	19	1507	genes
ANTXR1	143	66	209	254606	genes
ANTXR2	110	44	154	177783	genes
ANXA1	5	9	14	17882	genes
ANXA10	31	6	37	75602	genes
ANXA11	70	60	130	42164	genes
ANXA13	15	1	16	15883	genes
ANXA2	147	14	161	44475	genes
ANXA3	40	35	75	71820	genes
ANXA4	39	14	53	74706	genes
ANXA5	57	2	59	32936	genes
ANXA6	44	38	82	46808	genes
ANXA7	24	3	27	21928	genes
ANXA8L1	15	3	18	16262	genes
ANXA9	16	1	17	9522	genes
AOAH	79	71	150	184766	genes
AOC1	4	0	4	12534	genes
AOC2	16	1	17	5120	genes
AOC3	4	1	5	6873	genes
AOX1	50	17	67	71697	genes
AOX2	124	18	142	74844	genes
AOX4	44	11	55	70934	genes
AP1AR	17	5	22	28873	genes
AP1B1	99	72	171	48370	genes
AP1G1	34	11	45	81860	genes
AP1G2	7	0	7	8364	genes
AP1M1	176	5	181	29604	genes
AP1M2	8	1	9	10724	genes
AP1S1	38	0	38	5080	genes
AP1S2	2	4	6	26883	genes
AP1S3	24	19	43	66838	genes
AP2A1	49	5	54	27893	genes
AP2A2	113	64	177	67424	genes
AP2B1	94	46	140	108192	genes
AP2M1	9	0	9	8885	genes
AP2S1	5	5	10	9636	genes
AP3B1	78	17	95	235741	genes
AP3B2	31	4	35	36903	genes
AP3D1	86	8	94	33331	genes
AP3M1	25	3	28	20843	genes
AP3M2	5	43	48	17631	genes
AP3S1	8	51	59	75719	genes
AP3S2	13	2	15	41074	genes
AP4B1	22	1	23	10288	genes
AP4M1	27	1	28	3860	genes
AP4S1	26	24	50	48069	genes
AP5M1	6	0	6	20028	genes
AP5S1	1	0	1	4250	genes
AP5Z1	85	5	90	15676	genes
APAF1	29	20	49	82495	genes
APBA1	47	1	48	84345	genes
APBA2	74	6	80	113765	genes
APBA3	13	0	13	7414	genes
APBB1	22	0	22	22437	genes
APBB1IP	88	99	187	74312	genes
APBB2	308	69	377	381176	genes
APBB3	7	0	7	6236	genes
APC	35	10	45	95695	genes
APEH	14	0	14	8484	genes
APELA	8	1	9	24509	genes
APEX1	4	0	4	2581	genes
APEX2	1	0	1	7673	genes
APH1A	2	0	2	3646	genes
APH1B	32	17	49	40740	genes
API5	12	1	13	26778	genes
APIP	17	1	18	24114	genes
APLF	40	3	43	93199	genes
APLN	6	0	6	5809	genes
APLNR	0	15	15	3568	genes
APLP1	1	4	5	9660	genes
APMAP	36	15	51	28811	genes
APOA1	9	0	9	1888	genes
APOA2	2	2	4	1256	genes
APOA4	2	4	6	2773	genes
APOA5	48	2	50	2664	genes
APOBEC2	7	2	9	12667	genes
APOBEC3H	5	3	8	5410	genes
APOBEC3Z1	3	1	4	3758	genes
APOBEC3Z2	11	0	11	6194	genes
APOC2	1	0	1	2239	genes
APOC4	6	0	6	2384	genes
APOD	9	0	9	13308	genes
APOE	30	0	30	2687	genes
APOF	19	9	28	15018	genes
APOH	15	26	41	12762	genes
APOL3	68	80	148	41534	genes
APOL3	68	80	148	11954	genes
APOLD1	6	0	6	3882	genes
APON	2	0	2	1099	genes
APOO	18	1	19	53435	genes
APOOL	4	1	5	104988	genes
APP	371	37	408	312191	genes
APPL1	10	3	13	30824	genes
APPL2	74	29	103	51872	genes
APRT	6	0	6	2776	genes
APTX	4	8	12	15726	genes
AQP1	8	0	8	14199	genes
AQP11	3	0	3	11589	genes
AQP2	2	0	2	5476	genes
AQP3	27	1	28	5955	genes
AQP4	9	2	11	14546	genes
AQP5	16	0	16	3871	genes
AQP7	15	4	19	16607	genes
AQP8	5	4	9	10185	genes
AQP9	23	27	50	47923	genes
AQR	10	4	14	81299	genes
AR	9	1	10	209290	genes
ARAF	5	0	5	10435	genes
ARC	48	0	48	2326	genes
ARCN1	58	0	58	28577	genes
AREG	6	6	12	12158	genes
AREL1	34	44	78	42642	genes
ARF1	119	4	123	18059	genes
ARF2	14	9	23	18539	genes
ARF3	29	6	35	15284	genes
ARF4	35	6	41	18787	genes
ARF5	3	6	9	2982	genes
ARFGAP1	7	2	9	10330	genes
ARFGAP2	24	0	24	9598	genes
ARFGAP3	146	21	167	51917	genes
ARFGEF1	77	8	85	128587	genes
ARFGEF2	96	114	210	83479	genes
ARFIP1	78	20	98	157475	genes
ARFIP2	20	0	20	5118	genes
ARFRP1	20	0	20	6176	genes
ARG1	7	1	8	16990	genes
ARG2	26	6	32	35122	genes
ARGLU1	15	8	23	25717	genes
ARHGAP1	131	0	131	16666	genes
ARHGAP10	425	78	503	376619	genes
ARHGAP12	78	24	102	117289	genes
ARHGAP15	463	155	618	697408	genes
ARHGAP18	83	46	129	132945	genes
ARHGAP20	41	17	58	213949	genes
ARHGAP24	80	5	85	168434	genes
ARHGAP25	48	160	208	92145	genes
ARHGAP26	777	131	908	468759	genes
ARHGAP27	11	15	26	15427	genes
ARHGAP29	15	7	22	81403	genes
ARHGAP30	23	23	46	14972	genes
ARHGAP31	51	74	125	119086	genes
ARHGAP32	62	17	79	128781	genes
ARHGAP35	124	64	188	72290	genes
ARHGAP36	1	0	1	8270	genes
ARHGAP39	24	24	48	36513	genes
ARHGAP4	8	12	20	15726	genes
ARHGAP45	100	53	153	12779	genes
ARHGAP6	26	11	37	87765	genes
ARHGDIA	8	12	20	4016	genes
ARHGDIB	11	47	58	18893	genes
ARHGDIG	5	0	5	2433	genes
ARHGEF10L	505	154	659	152190	genes
ARHGEF12	64	15	79	167199	genes
ARHGEF15	76	0	76	8668	genes
ARHGEF16	40	3	43	13313	genes
ARHGEF17	91	29	120	57979	genes
ARHGEF19	48	36	84	10844	genes
ARHGEF2	8	41	49	24244	genes
ARHGEF25	3	0	3	7218	genes
ARHGEF26	214	31	245	137070	genes
ARHGEF28	150	17	167	134994	genes
ARHGEF37	41	18	59	54176	genes
ARHGEF39	0	1	1	3593	genes
ARHGEF40	55	7	62	19188	genes
ARHGEF5	10	6	16	22670	genes
ARHGEF6	3	5	8	115448	genes
ARHGEF7	157	63	220	94266	genes
ARHGEF9	34	8	42	316353	genes
ARID1A	204	37	241	68528	genes
ARID3A	12	25	37	28951	genes
ARID3B	24	87	111	45791	genes
ARID4A	14	6	20	62038	genes
ARID4B	78	38	116	138281	genes
ARID5A	14	3	17	11666	genes
ARIH1	49	18	67	102041	genes
ARIH2	37	25	62	38349	genes
ARL1	5	0	5	9433	genes
ARL10	1	1	2	4440	genes
ARL11	0	19	19	1852	genes
ARL14EP	21	5	26	13617	genes
ARL14EPL	14	3	17	29277	genes
ARL15	229	55	284	459416	genes
ARL2	2	6	8	7801	genes
ARL2BP	20	0	20	6028	genes
ARL3	54	8	62	29885	genes
ARL4A	4	0	4	1539	genes
ARL4D	21	0	21	1919	genes
ARL5A	23	3	26	22938	genes
ARL6	2	4	6	39353	genes
ARL6IP1	2	12	14	8620	genes
ARL6IP5	9	6	15	21462	genes
ARL6IP6	15	7	22	41231	genes
ARL8B	28	14	42	46426	genes
ARMC1	14	0	14	24785	genes
ARMC10	24	2	26	60634	genes
ARMC2	88	89	177	119790	genes
ARMC3	34	18	52	64948	genes
ARMC6	28	3	31	15903	genes
ARMC7	32	11	43	15041	genes
ARMC8	41	24	65	107057	genes
ARMC9	74	38	112	154031	genes
ARMCX3	1	4	5	4827	genes
ARMCX6	1	0	1	1906	genes
ARMH1	45	11	56	62382	genes
ARMH4	38	6	44	141704	genes
ARMT1	6	7	13	13515	genes
ARNT	17	19	36	64687	genes
ARNT2	159	40	199	192654	genes
ARNTL	89	68	157	107977	genes
ARNTL2	12	10	22	88943	genes
ARPC1A	35	6	41	23240	genes
ARPC1B	36	22	58	12594	genes
ARPC2	32	21	53	27618	genes
ARPC3	1	9	10	10809	genes
ARPC4	2	4	6	9146	genes
ARPC5	39	0	39	9393	genes
ARPC5L	31	0	31	7196	genes
ARPIN	13	2	15	8435	genes
ARPP19	31	5	36	15427	genes
ARPP21	11	0	11	6600	genes
ARR3	1	1	2	11917	genes
ARRB1	238	64	302	72588	genes
ARRB2	5	21	26	8655	genes
ARRDC1	141	0	141	7524	genes
ARRDC2	75	0	75	4507	genes
ARRDC3	8	0	8	12195	genes
ARRDC4	20	10	30	12766	genes
ARRDC5	6	0	6	13326	genes
ARSA	1	0	1	3138	genes
ARSB	120	81	201	180721	genes
ARSG	244	216	460	103685	genes
ARSK	16	11	27	54827	genes
ARSL	4	6	10	14764	genes
ART1	17	20	37	24522	genes
ART3	49	5	54	142162	genes
ARV1	2	9	11	23117	genes
ARVCF	35	15	50	3952	genes
AS3MT	15	1	16	17101	genes
ASAH1	33	2	35	31628	genes
ASAP1	266	392	658	339738	genes
ASAP3	131	21	152	44422	genes
ASB1	27	3	30	18715	genes
ASB11	19	1	20	28967	genes
ASB13	16	5	21	15371	genes
ASB14	11	1	12	14620	genes
ASB15	7	1	8	31975	genes
ASB16	7	0	7	7539	genes
ASB17	2	1	3	17752	genes
ASB18	81	4	85	71712	genes
ASB2	123	55	178	48874	genes
ASB3	24	4	28	118362	genes
ASB4	41	1	42	77130	genes
ASB5	92	5	97	40805	genes
ASB6	12	2	14	5228	genes
ASB7	12	9	21	52559	genes
ASB8	27	2	29	8451	genes
ASB9	6	0	6	28590	genes
ASCC1	19	25	44	109666	genes
ASCC2	193	21	214	35997	genes
ASCC3	66	11	77	332797	genes
ASCL2	12	0	12	1876	genes
ASF1A	4	0	4	12854	genes
ASF1B	18	6	24	12428	genes
ASGR1	10	0	10	3538	genes
ASGR2	14	3	17	9979	genes
ASH1L	34	17	51	176646	genes
ASH2L	17	4	21	25824	genes
ASIC1	27	0	27	22506	genes
ASIC2	1098	140	1238	1206384	genes
ASIC3	30	0	30	3971	genes
ASIP	12	0	12	28305	genes
ASL	25	0	25	8773	genes
ASMT	33	18	51	25751	genes
ASMTL	10	11	21	20551	genes
ASNS	76	39	115	147458	genes
ASNSD1	4	2	6	10853	genes
ASPA	12	3	15	21243	genes
ASPG	55	0	55	23361	genes
ASPH	59	24	83	187375	genes
ASPHD1	10	0	10	3808	genes
ASPM	22	4	26	60128	genes
ASPN	17	2	19	25346	genes
ASPSCR1	195	11	206	27915	genes
ASRGL1	17	22	39	18692	genes
ASS1	68	3	71	51997	genes
AST1	4	1	5	12283	genes
ASZ1	25	5	30	75804	genes
ATAD1	41	3	44	40881	genes
ATAD2	26	0	26	25232	genes
ATAD2B	22	10	32	121908	genes
ATAD3A	4	1	5	16395	genes
ATAD5	6	1	7	35562	genes
ATAT1	16	0	16	12783	genes
ATCAY	33	4	37	37698	genes
ATF1	11	4	15	64327	genes
ATF2	14	17	31	81377	genes
ATF3	8	20	28	12928	genes
ATF4	5	0	5	2096	genes
ATF6B	13	2	15	9863	genes
ATF7	76	26	102	90606	genes
ATF7IP	19	1	20	91883	genes
ATF7IP2	27	0	27	52136	genes
ATG10	59	26	85	262786	genes
ATG101	19	0	19	5806	genes
ATG12	5	2	7	22307	genes
ATG13	74	3	77	41757	genes
ATG14	16	10	26	36893	genes
ATG16L1	95	52	147	44271	genes
ATG16L2	49	5	54	15527	genes
ATG2A	25	3	28	21048	genes
ATG2B	49	15	64	77369	genes
ATG3	3	16	19	34595	genes
ATG4A	3	0	3	33183	genes
ATG4B	30	0	30	7813	genes
ATG4C	8	10	18	96166	genes
ATG4D	34	4	38	8491	genes
ATG5	32	56	88	113482	genes
ATG7	442	214	656	274102	genes
ATG9A	11	17	28	9395	genes
ATIC	15	2	17	23125	genes
ATL1	11	3	14	74184	genes
ATL2	54	4	58	67651	genes
ATL3	93	10	103	41505	genes
ATM	15	4	19	142635	genes
ATMIN	12	5	17	15121	genes
ATN1	66	18	84	8682	genes
ATOH8	18	14	32	42290	genes
ATOX1	16	4	20	15348	genes
ATP10D	45	6	51	136177	genes
ATP13A1	51	5	56	15574	genes
ATP13A2	62	16	78	20043	genes
ATP13A3	15	5	20	54731	genes
ATP1A1	108	10	118	32330	genes
ATP1A2	38	0	38	24609	genes
ATP1A4	23	29	52	32164	genes
ATP1B1	40	12	52	25541	genes
ATP1B3	4	21	25	36165	genes
ATP1B4	9	0	9	20827	genes
ATP23	5	1	6	22990	genes
ATP2A1	23	6	29	17335	genes
ATP2A2	59	20	79	54147	genes
ATP2A3	74	31	105	34078	genes
ATP2B1	45	78	123	129818	genes
ATP2B2	379	114	493	299770	genes
ATP2B3	18	0	18	41615	genes
ATP2B4	77	6	83	50186	genes
ATP2C1	28	39	67	153584	genes
ATP4A	23	2	25	12947	genes
ATP4B	5	60	65	4930	genes
ATP5F1A	10	0	10	8908	genes
ATP5F1B	11	0	11	5374	genes
ATP5F1C	22	2	24	16348	genes
ATP5F1D	39	0	39	2173	genes
ATP5F1E	3	0	3	3692	genes
ATP5IF1	18	0	18	2245	genes
ATP5MC1	8	0	8	2123	genes
ATP5MC3	2	0	2	3116	genes
ATP5ME	6	0	6	1541	genes
ATP5MF	19	0	19	5091	genes
ATP5MG	18	0	18	8132	genes
ATP5MJ	6	8	14	5357	genes
ATP5MK	9	3	12	5289	genes
ATP5PB	5	0	5	16908	genes
ATP5PD	1	0	1	4766	genes
ATP5PF	6	0	6	7317	genes
ATP5PO	2	1	3	7359	genes
ATP6AP1	1	14	15	7781	genes
ATP6AP1L	8	0	8	20424	genes
ATP6AP2	9	5	14	18334	genes
ATP6V0A1	40	36	76	49643	genes
ATP6V0A2	34	9	43	39725	genes
ATP6V0A4	36	2	38	46594	genes
ATP6V0B	3	1	4	3338	genes
ATP6V0C	24	4	28	5376	genes
ATP6V0D1	168	32	200	39067	genes
ATP6V0D2	33	15	48	56106	genes
ATP6V0E1	100	6	106	30014	genes
ATP6V0E2	7	1	8	5158	genes
ATP6V1A	21	13	34	60602	genes
ATP6V1B1	39	9	48	26056	genes
ATP6V1B2	14	1	15	26118	genes
ATP6V1C1	18	7	25	40118	genes
ATP6V1C2	126	4	130	59989	genes
ATP6V1D	34	4	38	15788	genes
ATP6V1E1	13	1	14	13632	genes
ATP6V1E2	1	1	2	7945	genes
ATP6V1F	8	0	8	2685	genes
ATP6V1G1	3	2	5	8991	genes
ATP6V1G2	5	0	5	2288	genes
ATP6V1H	9	3	12	47386	genes
ATP7A	4	1	5	70499	genes
ATP8A1	61	124	185	234155	genes
ATP8A2	239	73	312	450575	genes
ATP8B1	101	62	163	107694	genes
ATP8B2	13	30	43	19577	genes
ATP8B3	2	0	2	5760	genes
ATP9B	54	59	113	150267	genes
ATPAF2	27	1	28	11640	genes
ATRAID	1	1	2	4655	genes
ATRIP	25	12	37	17524	genes
ATRN	56	43	99	186412	genes
ATXN10	225	140	365	140689	genes
ATXN1L	9	0	9	7928	genes
ATXN2L	10	0	10	10928	genes
ATXN3	3	1	4	19896	genes
ATXN7L1	321	99	420	253508	genes
ATXN7L2	3	5	8	8700	genes
ATXN7L3	29	1	30	7857	genes
ATXN7L3B	4	0	4	3737	genes
AUH	49	90	139	182686	genes
AUNIP	6	0	6	12437	genes
AUP1	7	0	7	3032	genes
AURKA	8	11	19	15138	genes
AURKAIP1	6	0	6	4470	genes
AURKB	0	5	5	4846	genes
AURKC	2	0	2	4080	genes
AVIL	36	9	45	16018	genes
AVPI1	30	0	30	8096	genes
AVPR1A	2	0	2	3479	genes
AVPR1B	3	1	4	5521	genes
AVPR2	10	0	10	2400	genes
AXIN1	124	34	158	34111	genes
AXIN2	35	3	38	25957	genes
AZGP1	90	0	90	4490	genes
AZI2	23	7	30	40980	genes
AZIN1	30	2	32	31059	genes
AZIN2	39	29	68	42542	genes
B2M	5	0	5	8280	genes
B3GALNT1	10	3	13	32508	genes
B3GALNT2	23	7	30	65516	genes
B3GALT2	1	14	15	7649	genes
B3GALT4	4	0	4	1635	genes
B3GAT1	12	0	12	6510	genes
B3GAT2	60	15	75	94706	genes
B3GAT3	22	0	22	4625	genes
B3GNT2	11	68	79	32540	genes
B3GNT3	27	31	58	19940	genes
B3GNT5	12	26	38	62424	genes
B3GNT8	0	2	2	1799	genes
B3GNT9	15	0	15	2951	genes
B4GALNT1	0	3	3	6908	genes
B4GALNT3	452	17	469	96260	genes
B4GALT1	367	15	382	53165	genes
B4GALT2	4	1	5	10144	genes
B4GALT3	32	0	32	4986	genes
B4GALT4	23	2	25	30837	genes
B4GALT6	24	60	84	66387	genes
B4GALT7	1	0	1	6647	genes
B4GAT1	30	0	30	2232	genes
B9D1	14	0	14	8339	genes
B9D2	3	8	11	7582	genes
BAALC	89	16	105	87116	genes
BABAM1	5	2	7	5838	genes
BABAM2	285	92	377	421830	genes
BACE1	7	5	12	21659	genes
BACE2	50	12	62	105549	genes
BAD	23	0	23	11778	genes
BAG1	5	0	5	11199	genes
BAG2	26	6	32	10047	genes
BAG3	45	8	53	23436	genes
BAG4	29	4	33	25533	genes
BAG5	4	2	6	2891	genes
BAG6	14	0	14	11218	genes
BAHD1	3	0	3	8836	genes
BAIAP2	397	32	429	63582	genes
BAIAP2L2	13	9	22	29580	genes
BAK1	0	5	5	2994	genes
BAMBI	1	0	1	6888	genes
BANF1	4	0	4	1945	genes
BANF2	67	0	67	26001	genes
BANP	302	33	335	68723	genes
BAP1	8	3	11	8426	genes
BARD1	9	6	15	92746	genes
BARHL1	2	0	2	6552	genes
BARHL2	1	0	1	4617	genes
BARX2	95	4	99	82164	genes
BASP1	31	42	73	55386	genes
BATF	14	37	51	21950	genes
BATF2	5	7	12	5859	genes
BATF3	27	15	42	13321	genes
BAX	1	0	1	4009	genes
BAZ1A	34	10	44	86783	genes
BAZ1B	108	18	126	55868	genes
BAZ2A	60	8	68	34972	genes
BAZ2B	95	32	127	330381	genes
BBLN	10	0	10	3401	genes
BBOX1	25	1	26	76598	genes
BBS12	4	2	6	12468	genes
BBS2	9	10	19	25996	genes
BBS4	30	5	35	45971	genes
BBS5	6	0	6	20998	genes
BBS7	8	7	15	38979	genes
BBS9	41	32	73	452894	genes
BBX	124	30	154	292826	genes
BCAM	22	14	36	11313	genes
BCAN	15	2	17	18106	genes
BCAP29	10	3	13	51887	genes
BCAP31	65	6	71	28774	genes
BCAR1	151	0	151	22071	genes
BCAR3	308	71	379	221294	genes
BCAR4	1	1	2	7851	genes
BCAS1	307	31	338	65815	genes
BCAS2	6	0	6	14260	genes
BCAS4	103	56	159	56514	genes
BCAT1	46	21	67	117526	genes
BCAT2	7	4	11	14013	genes
BCCIP	17	4	21	16653	genes
BCHE	10	3	13	78402	genes
BCKDHA	62	1	63	19156	genes
BCKDHB	93	38	131	270674	genes
BCKDK	17	0	17	4209	genes
BCL10	10	0	10	9459	genes
BCL11A	141	75	216	101398	genes
BCL2	595	242	837	191446	genes
BCL2A1	10	15	25	9832	genes
BCL2L1	240	52	292	51258	genes
BCL2L11	51	97	148	42855	genes
BCL2L12	49	0	49	7063	genes
BCL2L13	57	85	142	51134	genes
BCL2L14	20	17	37	23263	genes
BCL2L15	1	21	22	4841	genes
BCL2L2	36	0	36	4864	genes
BCL3	92	0	92	9334	genes
BCL6	27	5	32	14778	genes
BCL6B	38	0	38	3987	genes
BCL7B	13	18	31	17748	genes
BCL7C	6	0	6	4743	genes
BCL9L	39	0	39	10630	genes
BCLAF1	25	0	25	28624	genes
BCNT2	76	13	89	39810	genes
BCO1	84	20	104	30846	genes
BCO2	19	27	46	67677	genes
BCOR	14	0	14	23735	genes
BCS1L	3	0	3	3959	genes
BDH1	27	15	42	35872	genes
BDH2	18	16	34	27376	genes
BDKRB1	2	2	4	11446	genes
BDKRB2	69	1	70	40530	genes
BDNF	25	3	28	36621	genes
BECN1	4	0	4	10176	genes
BEGAIN	74	3	77	27450	genes
BEND3	11	3	14	14338	genes
BEND4	33	2	35	28852	genes
BEND5	65	13	78	49862	genes
BEND6	44	21	65	63305	genes
BEND7	75	26	101	86882	genes
BERV-K1	10	0	10	2142	genes
BEST1	7	7	14	9828	genes
BEST4	7	0	7	3654	genes
BET1	1	3	4	14521	genes
BET1L	46	0	46	4331	genes
BFAR	58	29	87	31779	genes
BFSP1	30	2	32	38320	genes
BFSP2	73	18	91	76828	genes
BGLAP	4	0	4	1045	genes
BGN	7	0	7	13784	genes
BHLHE40	47	0	47	5642	genes
BHMT	4	4	8	22562	genes
BICD2	98	13	111	55871	genes
BICDL2	25	10	35	7889	genes
BICRAL	11	0	11	34258	genes
BID	36	24	60	17509	genes
BIN1	137	65	202	56706	genes
BIN2	21	64	85	37167	genes
BIN3	44	22	66	50562	genes
BIRC3	10	2	12	13531	genes
BIRC5	5	1	6	7287	genes
BIRC6	36	30	66	213612	genes
BIVM	4	10	14	46171	genes
BLA-DQB	0	1	1	7821	genes
BLCAP	8	43	51	10486	genes
BLK	71	22	93	51835	genes
BLMH	53	11	64	41292	genes
BLNK	34	62	96	91179	genes
BLOC1S1	5	0	5	3650	genes
BLOC1S3	21	0	21	3118	genes
BLOC1S4	3	0	3	1490	genes
BLOC1S5	26	14	40	24550	genes
BLOC1S6	8	1	9	14620	genes
BLVRA	11	28	39	51532	genes
BLVRB	2	2	4	17016	genes
BLZF1	7	19	26	22295	genes
BMERB1	84	2	86	144891	genes
BMF	65	6	71	14591	genes
BMP10	0	6	6	6718	genes
BMP15	0	2	2	6626	genes
BMP2	2	3	5	11255	genes
BMP2K	28	39	67	118284	genes
BMP3	13	3	16	27287	genes
BMP4	9	0	9	3729	genes
BMP5	37	17	54	144212	genes
BMP7	67	38	105	85425	genes
BMP8A	62	19	81	40667	genes
BMPER	164	31	195	252725	genes
BMPR1A	30	13	43	58118	genes
BMPR1B	9	16	25	51655	genes
BMPR2	69	25	94	152703	genes
BMS1	3	1	4	32185	genes
BMX	5	5	10	37469	genes
BNIP1	16	0	16	13190	genes
BNIP2	0	14	14	20830	genes
BNIP3	2	0	2	3964	genes
BNIP3L	4	28	32	23370	genes
BNIPL	17	0	17	8251	genes
BOC	82	12	94	38917	genes
BOD1	7	1	8	12228	genes
BOD1L1	11	6	17	53402	genes
BOK	82	0	82	12280	genes
BoLA	35	0	35	5230	genes
BOLA	188	60	248	199663	genes
BOLA	188	60	248	199473	genes
BOLA-A	35	0	35	5297	genes
BOLA-DMA	2	13	15	5368	genes
BOLA-DMB	6	23	29	6845	genes
BOLA-DOA	1	8	9	6057	genes
BOLA-DOB	2	14	16	8481	genes
BOLA-DRA	0	8	8	4702	genes
BOLA-DRB3	0	19	19	11084	genes
BOLA-DYA	29	0	29	5888	genes
BOLA-DYB	11	0	11	8437	genes
BOLA-NC1	7	0	7	3526	genes
BOLA1	1	0	1	1325	genes
BOLA3	3	0	3	7952	genes
BOLL	10	4	14	68863	genes
BORA	12	3	15	28734	genes
BORCS5	85	27	112	97372	genes
BORCS6	1	0	1	1831	genes
BORCS8	11	3	14	12974	genes
BPGM	10	7	17	31383	genes
BPHL	81	8	89	21776	genes
BPI	21	16	37	29363	genes
BPIFA1	14	0	14	7065	genes
BPIFA2A	3	1	4	42080	genes
BPIFA2B	9	3	12	10371	genes
BPIFA2C	8	1	9	9219	genes
BPIFA3	2	0	2	11548	genes
BPIFB1	12	7	19	21152	genes
BPIFB2	41	3	44	18356	genes
BPIFB3	9	4	13	16261	genes
BPIFB5	16	10	26	18359	genes
BPIFB6	11	2	13	15531	genes
BPIFC	31	12	43	44069	genes
BPNT1	29	3	32	26642	genes
BPNT2	1	0	1	15971	genes
BRAP	14	26	40	30613	genes
BRAT1	21	10	31	10388	genes
BRCA1	10	16	26	68863	genes
BRCC3	6	3	9	78453	genes
BRD2	60	0	60	7166	genes
BRD3	158	35	193	33693	genes
BRD7	49	5	54	44813	genes
BRD9	17	2	19	18532	genes
BRDT	1	1	2	19567	genes
BREH1	16	0	16	26629	genes
BRF2	2	0	2	4325	genes
BRI3	31	3	34	6901	genes
BRI3BP	25	17	42	21125	genes
BRINP1	205	82	287	197265	genes
BRINP3	130	34	164	485844	genes
BRIX1	5	0	5	8886	genes
BRK1	9	1	10	7553	genes
BRMS1	10	16	26	7047	genes
BRMS1L	6	11	17	44033	genes
BROX	10	0	10	20544	genes
BRPF1	5	0	5	13387	genes
BRPF3	31	3	34	32421	genes
BRWD1	31	17	48	123688	genes
BSCL2	30	1	31	9530	genes
BSDC1	29	42	71	22908	genes
BSG	34	1	35	6978	genes
BSND	20	1	21	10113	genes
BSP1	1	0	1	4533	genes
BSP3	6	0	6	3327	genes
BSP5	10	0	10	4350	genes
BSPRY	82	0	82	24501	genes
BTBD1	16	11	27	50315	genes
BTBD10	10	0	10	45187	genes
BTBD11	186	46	232	331115	genes
BTBD16	56	23	79	52672	genes
BTBD17	1	3	4	5123	genes
BTBD19	10	2	12	5430	genes
BTBD6	20	0	20	2148	genes
BTBD8	3	2	5	62460	genes
BTBD9	190	96	286	410034	genes
BTC	16	7	23	49903	genes
BTD	45	17	62	41104	genes
BTF3	6	0	6	6547	genes
BTF3L4	8	4	12	21922	genes
BTG1	1	0	1	2713	genes
BTG3	12	5	17	18958	genes
BTK	8	1	9	33904	genes
BTN1A1	47	0	47	6288	genes
BTNL2	14	0	14	24652	genes
BTNL9	9	1	10	22791	genes
BTRC	37	87	124	171386	genes
BUB1	2	12	14	33168	genes
BUB1B	6	5	11	55057	genes
BUB3	7	1	8	12041	genes
BUD13	3	0	3	24643	genes
BUD23	5	0	5	11352	genes
BUD31	2	1	3	7940	genes
BYSL	16	2	18	9296	genes
BZW1	10	1	11	15446	genes
BZW2	57	15	72	62621	genes
C10H14orf93	13	5	18	16532	genes
C10H15orf48	1	3	4	3662	genes
C11H2orf42	8	27	35	39069	genes
C11H2orf49	19	14	33	10464	genes
C11H2orf50	6	2	8	7067	genes
C11H2orf68	31	2	33	5921	genes
C11H2orf73	7	0	7	26350	genes
C11H2orf81	14	0	14	5884	genes
C11H9orf116	13	0	13	4542	genes
C11H9orf78	4	2	6	8529	genes
C12H13orf46	27	0	27	12489	genes
C13H20orf27	9	7	16	13037	genes
C13H20orf85	3	4	7	15795	genes
C14H8orf33	5	0	5	2070	genes
C14H8orf34	58	17	75	364420	genes
C14H8orf76	15	5	20	15188	genes
C14H8orf82	7	3	10	2526	genes
C15H11orf1	8	0	8	4642	genes
C15H11orf16	4	2	6	9495	genes
C15H11orf34	3	4	7	12110	genes
C15H11orf49	222	42	264	210598	genes
C15H11orf58	15	0	15	26525	genes
C15H11orf87	1	0	1	6977	genes
C15H11orf91	3	0	3	1948	genes
C15H11orf97	18	1	19	33736	genes
C16H1orf100	31	17	48	36095	genes
C16H1orf105	79	32	111	32969	genes
C16H1orf115	32	1	33	12533	genes
C16H1orf116	66	3	69	11463	genes
C16H1orf158	16	1	17	31956	genes
C16H1orf159	5	3	8	9080	genes
C16H1orf174	6	2	8	5907	genes
C16H1orf21	226	85	311	181532	genes
C16H1orf74	3	0	3	2259	genes
C17H12orf43	6	1	7	10147	genes
C17H22orf31	28	6	34	3102	genes
C17H22orf39	12	0	12	4384	genes
C17H4orf45	76	12	88	133478	genes
C17H5orf52	1	0	1	4644	genes
C18H16orf78	12	1	13	16896	genes
C18H16orf87	43	4	47	32264	genes
C18H19orf12	3	11	14	12097	genes
C18H19orf33	11	0	11	839	genes
C18H19orf47	10	4	14	15363	genes
C18H19orf48	22	3	25	6475	genes
C18H19orf54	8	5	13	8031	genes
C19H17orf49	5	0	5	2781	genes
C19H17orf64	2	2	4	11220	genes
C19H17orf78	15	9	24	12941	genes
C19H17orf98	10	0	10	3283	genes
C1D	8	1	9	18628	genes
C1GALT1	33	4	37	43840	genes
C1H21orf62	14	4	18	19410	genes
C1H21orf91	22	0	22	28820	genes
C1H3orf38	10	0	10	5977	genes
C1H3orf70	28	37	65	120735	genes
C1QB	6	0	6	6742	genes
C1QBP	2	2	4	5431	genes
C1QC	6	0	6	4372	genes
C1QL1	13	0	13	7093	genes
C1QL2	1	0	1	2232	genes
C1QL3	1	0	1	7509	genes
C1QTNF1	19	0	19	6557	genes
C1QTNF3	9	1	10	32273	genes
C1QTNF5	0	3	3	1939	genes
C1QTNF6	9	2	11	7293	genes
C1QTNF7	75	26	101	127937	genes
C1QTNF9	1	13	14	7906	genes
C1R	3	0	3	10801	genes
C1RL	0	12	12	9708	genes
C1S	9	2	11	11185	genes
C2	13	0	13	11669	genes
C20H5orf22	2	0	2	15765	genes
C20H5orf34	2	0	2	26838	genes
C20H5orf47	3	0	3	17181	genes
C21H14orf132	47	5	52	47187	genes
C21H14orf180	33	1	34	8380	genes
C21H14orf28	10	0	10	8755	genes
C21H15orf40	1	7	8	6286	genes
C22H3orf14	3	4	7	14464	genes
C22H3orf18	3	0	3	8446	genes
C22H3orf22	10	2	12	3993	genes
C22H3orf84	18	1	19	7994	genes
C23H6orf136	7	7	14	3718	genes
C23H6orf141	11	0	11	4371	genes
C23H6orf47	8	0	8	1643	genes
C23H6orf52	19	2	21	14639	genes
C23H6orf62	21	0	21	12143	genes
C24H18orf21	1	2	3	7967	genes
C24H18orf25	22	12	34	82025	genes
C24H18orf32	7	0	7	5344	genes
C24H18orf54	2	7	9	18916	genes
C25H16orf54	2	44	46	2693	genes
C25H16orf82	3	0	3	2057	genes
C25H7orf26	26	4	30	11185	genes
C25H7orf50	478	65	543	67368	genes
C25H7orf61	24	0	24	3190	genes
C26H10orf82	2	4	6	7731	genes
C28H10orf53	17	0	17	9604	genes
C28H1orf198	60	4	64	32069	genes
C29H11orf24	7	5	12	9663	genes
C29H11orf54	3	10	13	24286	genes
C29H11orf68	41	0	41	2220	genes
C29H11orf86	4	0	4	1486	genes
C29H11orf98	2	0	2	3388	genes
C2CD2	123	8	131	61663	genes
C2CD2L	4	4	8	9894	genes
C2CD3	10	2	12	17030	genes
C2CD5	23	20	43	91789	genes
C2CD6	23	12	35	123500	genes
C2H2orf76	33	15	48	84423	genes
C2H2orf80	37	2	39	23374	genes
C2H2orf88	4	8	12	77667	genes
C3	23	6	29	36010	genes
C3AR1	3	3	6	9331	genes
C3H1orf109	27	0	27	8263	genes
C3H1orf141	21	2	23	45089	genes
C3H1orf146	5	0	5	23484	genes
C3H1orf185	13	0	13	45221	genes
C3H1orf210	2	0	2	3053	genes
C3H1orf226	4	4	8	2468	genes
C3H1orf43	6	5	11	8409	genes
C3H1orf50	7	0	7	7369	genes
C3H1orf52	10	0	10	7261	genes
C3H1orf54	5	1	6	6865	genes
C3H1orf56	4	1	5	2150	genes
C3H1orf87	11	12	23	80949	genes
C4A	29	9	38	14790	genes
C4BPA	21	0	21	45935	genes
C4BPB	5	1	6	11230	genes
C4H7orf25	2	0	2	2669	genes
C4H7orf57	32	32	64	28884	genes
C5	79	18	97	97474	genes
C5AR1	50	19	69	13667	genes
C5AR2	9	0	9	4748	genes
C5H12orf29	4	2	6	9898	genes
C5H12orf4	21	25	46	39715	genes
C5H12orf50	22	1	23	29533	genes
C5H12orf54	6	2	8	24403	genes
C5H12orf57	25	0	25	1841	genes
C5H12orf73	6	1	7	6856	genes
C5H12orf75	19	18	37	44855	genes
C5H22orf23	9	7	16	7865	genes
C6	34	1	35	76964	genes
C6H4orf17	2	0	2	26270	genes
C6H4orf19	171	22	193	78562	genes
C7	34	0	34	57025	genes
C7H19orf25	3	0	3	5001	genes
C7H19orf53	23	0	23	5430	genes
C7H19orf71	19	2	21	3460	genes
C7H1orf35	4	0	4	2257	genes
C7H5orf15	3	0	3	12977	genes
C7H5orf24	6	0	6	7290	genes
C7H5orf46	8	0	8	11936	genes
C8A	28	3	31	71825	genes
C8B	41	7	48	43471	genes
C8G	8	0	8	1456	genes
C8H8orf74	48	4	52	30885	genes
C8H9orf135	15	0	15	104032	genes
C8H9orf152	6	0	6	6269	genes
C8H9orf3	524	101	625	422184	genes
C8H9orf43	6	16	22	17875	genes
C8H9orf64	3	3	6	11756	genes
C8H9orf72	7	5	12	20215	genes
C8H9orf85	23	2	25	60040	genes
C9	35	5	40	66815	genes
C9H6orf118	42	1	43	24056	genes
C9H6orf120	18	0	18	2611	genes
C9H6orf163	8	1	9	27905	genes
CA1	2	0	2	10440	genes
CA10	174	14	188	845692	genes
CA11	3	0	3	5992	genes
CA14	6	1	7	7177	genes
CA2	16	1	17	17643	genes
CA3	12	0	12	9997	genes
CA4	9	6	15	7763	genes
CA5A	64	57	121	22514	genes
CA5B	0	6	6	27389	genes
CA6	17	7	24	24766	genes
CA7	5	1	6	9041	genes
CA8	78	9	87	82027	genes
CAAP1	10	7	17	70626	genes
CAB39	101	51	152	102414	genes
CABCOCO1	29	38	67	170426	genes
CABP1	13	9	22	16422	genes
CABP2	2	1	3	4758	genes
CABP4	4	0	4	3497	genes
CABP5	7	2	9	9225	genes
CABYR	41	1	42	17143	genes
CACFD1	2	11	13	8983	genes
CACNA1A	251	35	286	252226	genes
CACNA1B	436	130	566	210777	genes
CACNA1D	342	62	404	345703	genes
CACNA1E	260	42	302	328985	genes
CACNA1F	5	1	6	27261	genes
CACNA1G	67	23	90	61626	genes
CACNA2D1	91	34	125	519478	genes
CACNA2D3	430	82	512	893877	genes
CACNB1	32	14	46	18703	genes
CACNB2	154	69	223	281524	genes
CACNB3	30	0	30	9072	genes
CACNB4	154	66	220	271796	genes
CACNG1	13	0	13	7611	genes
CACNG2	110	13	123	121154	genes
CACNG3	52	14	66	100704	genes
CACNG5	18	0	18	5798	genes
CACNG6	13	3	16	13979	genes
CACYBP	20	2	22	10753	genes
CAD	32	2	34	21564	genes
CADM1	337	81	418	350118	genes
CADM3	21	7	28	30946	genes
CADPS	239	21	260	470794	genes
CADPS2	100	35	135	580136	genes
CALB1	10	0	10	21929	genes
CALB2	23	1	24	29285	genes
CALCA	3	0	3	5509	genes
CALCB	5	0	5	3038	genes
CALCOCO1	9	0	9	14104	genes
CALCOCO2	15	0	15	16146	genes
CALCR	72	4	76	110105	genes
CALCRL	50	9	59	128710	genes
CALD1	104	21	125	105369	genes
CALHM2	8	0	8	5353	genes
CALHM3	11	2	13	5745	genes
CALHM4	14	0	14	8042	genes
CALM	1	0	1	1163	genes
CALM1	2	14	16	7740	genes
CALM2	30	2	32	12935	genes
CALM3	116	0	116	9075	genes
CALML4	13	11	24	9312	genes
CALML5	10	0	10	837	genes
CALN1	166	38	204	454776	genes
CALR	7	0	7	3831	genes
CALR3	53	4	57	24899	genes
CALU	23	5	28	23532	genes
CALY	8	0	8	10924	genes
CAMK1	9	0	9	10578	genes
CAMK1G	24	9	33	30756	genes
CAMK2A	84	9	93	64064	genes
CAMK2B	83	55	138	90633	genes
CAMK2D	149	133	282	307246	genes
CAMK2G	136	73	209	53486	genes
CAMK2N1	0	1	1	3118	genes
CAMK2N2	1	0	1	2156	genes
CAMKK1	108	56	164	28131	genes
CAMKK2	12	8	20	31766	genes
CAMKMT	116	26	142	427562	genes
CAMKV	8	0	8	11519	genes
CAMLG	4	1	5	7751	genes
CAMP	0	8	8	1961	genes
CAMSAP1	96	14	110	42714	genes
CAMSAP3	61	1	62	16487	genes
CAMTA2	44	2	46	15475	genes
CAND1	25	1	26	34303	genes
CAND2	82	4	86	28429	genes
CANX	16	10	26	32165	genes
CAP1	26	20	46	28614	genes
CAP2	33	20	53	134996	genes
CAPG	31	37	68	14964	genes
CAPN1	50	10	60	27086	genes
CAPN12	8	1	9	12155	genes
CAPN13	40	13	53	76001	genes
CAPN14	42	10	52	36301	genes
CAPN2	56	7	63	58323	genes
CAPN3	39	22	61	55723	genes
CAPN5	152	13	165	57216	genes
CAPN6	10	0	10	24657	genes
CAPN7	48	32	80	51719	genes
CAPN8	103	10	113	44914	genes
CAPNS1	11	1	12	6921	genes
CAPRIN1	33	1	34	35357	genes
CAPS	43	0	43	1541	genes
CAPSL	13	6	19	27772	genes
CAPZA1	28	2	30	44173	genes
CAPZA2	16	9	25	54987	genes
CAPZA3	0	1	1	1086	genes
CAPZB	460	127	587	137881	genes
CARD11	281	67	348	106448	genes
CARD14	37	3	40	20728	genes
CARD19	9	13	22	15439	genes
CARD6	4	1	5	14861	genes
CARD9	90	15	105	7066	genes
CARF	6	1	7	68025	genes
CARHSP1	10	20	30	11416	genes
CARMIL1	371	69	440	306288	genes
CARMIL3	25	0	25	16871	genes
CARS1	112	15	127	52637	genes
CARS2	24	17	41	19126	genes
CARTPT	1	0	1	2090	genes
CASC3	33	6	39	21818	genes
CASK	53	13	66	372897	genes
CASKIN2	51	3	54	12407	genes
CASP14	2	0	2	3605	genes
CASP2	15	4	19	16761	genes
CASP3	13	21	34	25073	genes
CASP4	1	1	2	19459	genes
CASP6	59	0	59	20841	genes
CASP8	14	20	34	23668	genes
CASP9	4	7	11	22736	genes
CASQ1	8	4	12	9652	genes
CASQ2	44	13	57	70557	genes
CASR	33	10	43	89119	genes
CAST	158	32	190	132590	genes
CASTOR1	10	3	13	4517	genes
CAT	51	15	66	35945	genes
CATHL1	4	2	6	21511	genes
CATHL2	10	4	14	1505	genes
CATHL3	0	5	5	2181	genes
CATHL5	0	7	7	1953	genes
CATHL6	0	10	10	1925	genes
CATSPER2	5	1	6	18110	genes
CATSPER3	4	3	7	31339	genes
CAV1	5	1	6	35642	genes
CAV2	10	0	10	5242	genes
CAV3	10	0	10	13748	genes
CAVIN1	25	4	29	14683	genes
CAVIN3	1	0	1	1622	genes
CAVIN4	1	0	1	12178	genes
CBFB	50	12	62	46720	genes
CBLB	76	20	96	221123	genes
CBLC	27	0	27	15647	genes
CBLIF	31	15	46	19073	genes
CBLL1	1	4	5	14620	genes
CBLN1	3	0	3	2604	genes
CBLN2	7	0	7	6816	genes
CBLN3	3	1	4	1537	genes
CBLN4	10	0	10	7069	genes
CBR1	0	1	1	6796	genes
CBR3	25	0	25	9788	genes
CBR4	15	0	15	24623	genes
CBS	19	13	32	22893	genes
CBX1	21	1	22	19153	genes
CBX2	19	1	20	6303	genes
CBX3	1	1	2	11074	genes
CBX5	63	3	66	26537	genes
CBX6	111	5	116	8090	genes
CBX7	24	3	27	16619	genes
CBX8	7	0	7	2538	genes
CBY1	6	0	6	9390	genes
CBY2	6	0	6	12401	genes
CC2D1A	40	0	40	18320	genes
CCAR1	17	11	28	46453	genes
CCAR2	17	2	19	14650	genes
CCDC102A	56	7	63	21579	genes
CCDC105	2	1	3	9618	genes
CCDC106	3	49	52	3552	genes
CCDC107	2	0	2	2528	genes
CCDC112	11	8	19	30284	genes
CCDC113	13	8	21	33427	genes
CCDC116	1	16	17	3000	genes
CCDC117	30	19	49	19504	genes
CCDC12	131	180	311	36349	genes
CCDC120	2	0	2	7033	genes
CCDC122	3	3	6	25630	genes
CCDC124	17	1	18	10637	genes
CCDC126	11	5	16	42297	genes
CCDC127	2	1	3	15608	genes
CCDC13	132	2	134	31586	genes
CCDC134	21	2	23	15202	genes
CCDC137	1	0	1	5652	genes
CCDC14	10	2	12	43075	genes
CCDC141	108	22	130	221337	genes
CCDC146	98	21	119	118110	genes
CCDC149	47	12	59	117154	genes
CCDC153	10	1	11	4233	genes
CCDC157	87	4	91	12191	genes
CCDC160	13	0	13	8381	genes
CCDC167	2	45	47	15535	genes
CCDC172	11	1	12	57698	genes
CCDC174	21	4	25	21128	genes
CCDC175	20	4	24	74248	genes
CCDC181	0	3	3	15724	genes
CCDC183	23	5	28	8129	genes
CCDC185	0	3	3	2075	genes
CCDC189	10	1	11	5911	genes
CCDC190	11	0	11	8737	genes
CCDC196	24	1	25	15471	genes
CCDC197	46	15	61	13021	genes
CCDC22	1	5	6	15081	genes
CCDC25	66	0	66	30076	genes
CCDC28B	20	0	20	4073	genes
CCDC3	22	2	24	91045	genes
CCDC32	1	2	3	9457	genes
CCDC39	5	9	14	52198	genes
CCDC42	25	10	35	12806	genes
CCDC43	6	0	6	9344	genes
CCDC47	10	11	21	20025	genes
CCDC50	26	21	47	79161	genes
CCDC51	29	1	30	9349	genes
CCDC59	13	0	13	6425	genes
CCDC63	15	13	28	37977	genes
CCDC65	1	0	1	8203	genes
CCDC66	7	0	7	39661	genes
CCDC69	25	25	50	35432	genes
CCDC70	1	1	2	6184	genes
CCDC71	17	0	17	3686	genes
CCDC73	25	0	25	115974	genes
CCDC77	16	7	23	26724	genes
CCDC8	6	1	7	2623	genes
CCDC80	44	19	63	35594	genes
CCDC82	9	13	22	31583	genes
CCDC83	21	5	26	52154	genes
CCDC85A	43	21	64	225289	genes
CCDC86	9	3	12	8733	genes
CCDC88A	16	6	22	115693	genes
CCDC88B	38	40	78	14984	genes
CCDC88C	14	7	21	16118	genes
CCDC89	3	0	3	1416	genes
CCDC9	11	5	16	10674	genes
CCDC90B	10	2	12	26502	genes
CCDC91	69	31	100	394262	genes
CCDC92	101	35	136	35932	genes
CCDC93	45	13	58	99188	genes
CCDC96	11	0	11	2891	genes
CCDC97	14	7	21	10328	genes
CCER2	3	0	3	2457	genes
CCHCR1	12	3	15	11393	genes
CCIN	0	6	6	1946	genes
CCK	2	0	2	5612	genes
CCKAR	6	13	19	11221	genes
CCKBR	20	0	20	10844	genes
CCL11	3	2	5	2898	genes
CCL14	3	0	3	4824	genes
CCL2	1	0	1	1868	genes
CCL20	2	0	2	3083	genes
CCL22	15	5	20	8041	genes
CCL24	21	1	22	3315	genes
CCL25	22	5	27	27312	genes
CCL26	22	6	28	4572	genes
CCL28	33	3	36	18473	genes
CCL3	1	19	20	1509	genes
CCL4	0	5	5	1569	genes
CCL5	6	17	23	6748	genes
CCM2	25	71	96	51108	genes
CCN1	57	0	57	2910	genes
CCN2	33	0	33	3232	genes
CCN3	12	0	12	8379	genes
CCN5	33	13	46	14282	genes
CCNB1	9	0	9	9675	genes
CCNB1IP1	0	2	2	7830	genes
CCNB2	3	10	13	24701	genes
CCNC	4	5	9	25732	genes
CCND1	40	0	40	9459	genes
CCND2	69	2	71	22874	genes
CCND3	38	34	72	6821	genes
CCNDBP1	4	2	6	10341	genes
CCNE1	5	2	7	10499	genes
CCNE2	2	2	4	12652	genes
CCNF	35	2	37	17769	genes
CCNG1	19	0	19	7265	genes
CCNH	2	2	4	30463	genes
CCNI	31	2	33	38914	genes
CCNJ	4	3	7	14364	genes
CCNK	18	7	25	15773	genes
CCNL1	26	4	30	13886	genes
CCNL2	36	0	36	8135	genes
CCNT1	30	4	34	36063	genes
CCNT2	36	5	41	32036	genes
CCNY	8	9	17	36038	genes
CCR1	1	12	13	6048	genes
CCR10	5	0	5	1968	genes
CCR2	0	1	1	1113	genes
CCR4	23	0	23	4948	genes
CCR5	1	7	8	3168	genes
CCR7	28	9	37	11156	genes
CCR8	0	3	3	1059	genes
CCR9	13	37	50	16015	genes
CCRL2	3	8	11	1898	genes
CCS	12	13	25	13619	genes
CCSER1	42	151	193	837665	genes
CCT2	8	2	10	15806	genes
CCT3	6	2	8	14559	genes
CCT4	10	7	17	12629	genes
CCT5	8	2	10	14009	genes
CCT6A	10	0	10	10167	genes
CCT6B	2	3	5	35836	genes
CCT7	52	0	52	17294	genes
CCT8	8	1	9	13746	genes
CCZ1	10	17	27	15959	genes
CD101	21	22	43	36404	genes
CD14	2	0	2	1417	genes
CD151	62	0	62	4952	genes
CD163	11	8	19	31969	genes
CD163L1	18	1	19	63770	genes
CD164	11	0	11	10722	genes
CD164L2	0	13	13	3939	genes
CD177	19	20	39	10868	genes
CD180	3	2	5	14446	genes
CD19	5	0	5	6402	genes
CD1A	3	0	3	3505	genes
CD1B	4	1	5	3350	genes
CD1B5	1	0	1	4284	genes
CD1D	7	4	11	3596	genes
CD1E	4	3	7	3499	genes
CD2	29	9	38	14489	genes
CD200	13	1	14	21416	genes
CD200R1L	17	14	31	41286	genes
CD209	1	0	1	2904	genes
CD244	69	12	81	36810	genes
CD247	147	71	218	83969	genes
CD27	14	0	14	5575	genes
CD274	2	1	3	17394	genes
CD28	8	3	11	33310	genes
CD2AP	60	5	65	86117	genes
CD2BP2	6	0	6	2366	genes
CD300A	31	55	86	16519	genes
CD300LB	4	2	6	10336	genes
CD302	3	2	5	25604	genes
CD320	8	0	8	4717	genes
CD34	7	73	80	23094	genes
CD36	94	5	99	63036	genes
CD37	16	10	26	5097	genes
CD38	44	18	62	55831	genes
CD3D	8	0	8	4161	genes
CD3E	16	2	18	10615	genes
CD3G	12	0	12	11493	genes
CD4	8	10	18	16189	genes
CD40	19	2	21	10700	genes
CD44	65	68	133	87913	genes
CD46	27	7	34	39037	genes
CD47	50	34	84	65051	genes
CD48	14	17	31	30478	genes
CD5	15	15	30	21541	genes
CD52	5	0	5	1779	genes
CD53	35	21	56	38819	genes
CD55	19	1	20	18661	genes
CD59	45	20	65	21529	genes
CD5L	7	0	7	17959	genes
CD63	3	1	4	3208	genes
CD68	10	0	10	2050	genes
CD69	3	16	19	7091	genes
CD7	15	0	15	3414	genes
CD70	8	0	8	4823	genes
CD74	7	6	13	7763	genes
CD79A	19	27	46	3690	genes
CD80	18	0	18	21956	genes
CD81	151	2	153	19706	genes
CD82	118	133	251	55811	genes
CD83	31	23	54	19691	genes
CD86	16	37	53	66680	genes
CD8A	4	0	4	7074	genes
CD8B	10	0	10	19744	genes
CD9	187	21	208	35682	genes
CD96	32	4	36	96602	genes
CD99	10	68	78	30175	genes
CD99L2	26	6	32	121537	genes
CDA	27	16	43	20933	genes
CDADC1	37	2	39	28387	genes
CDC123	17	6	23	46387	genes
CDC14B	47	37	84	120333	genes
CDC16	42	5	47	26534	genes
CDC20	1	18	19	3888	genes
CDC20B	35	10	45	64378	genes
CDC23	0	2	2	20093	genes
CDC25A	58	7	65	21643	genes
CDC25B	29	1	30	9598	genes
CDC25C	1	0	1	30669	genes
CDC26	11	0	11	11160	genes
CDC27	16	1	17	57465	genes
CDC34	44	2	46	6605	genes
CDC37	45	5	50	11177	genes
CDC37L1	3	1	4	14965	genes
CDC40	12	1	13	48067	genes
CDC42	6	3	9	20970	genes
CDC42BPA	62	25	87	292599	genes
CDC42BPG	179	0	179	18367	genes
CDC42EP1	49	0	49	7833	genes
CDC42EP2	7	1	8	5813	genes
CDC42EP3	18	39	57	25284	genes
CDC42EP4	7	1	8	2654	genes
CDC42SE1	23	2	25	7627	genes
CDC42SE2	126	83	209	119011	genes
CDC45	4	59	63	14963	genes
CDC5L	36	8	44	40475	genes
CDC6	33	10	43	10974	genes
CDC7	6	7	13	25065	genes
CDC73	39	56	95	90514	genes
CDCA2	6	5	11	43208	genes
CDCA3	14	0	14	2245	genes
CDCA5	7	30	37	16776	genes
CDCA7	11	12	23	13176	genes
CDCA7L	70	73	143	43206	genes
CDCA8	5	5	10	15066	genes
CDH1	263	3	266	70896	genes
CDH10	30	14	44	186322	genes
CDH11	35	6	41	90093	genes
CDH12	61	3	64	375294	genes
CDH13	821	112	933	1016104	genes
CDH15	51	12	63	18984	genes
CDH16	14	0	14	9896	genes
CDH17	24	24	48	88842	genes
CDH18	109	23	132	603555	genes
CDH19	1	6	7	32171	genes
CDH2	108	41	149	248360	genes
CDH20	67	16	83	54534	genes
CDH22	131	4	135	83717	genes
CDH23	490	188	678	393222	genes
CDH3	22	6	28	45264	genes
CDH5	27	7	34	36290	genes
CDH6	60	12	72	144982	genes
CDH7	29	8	37	133625	genes
CDH8	146	17	163	332898	genes
CDH9	36	7	43	138593	genes
CDHR1	10	2	12	21294	genes
CDHR2	53	8	61	26775	genes
CDHR4	49	7	56	7454	genes
CDHR5	35	15	50	6917	genes
CDIN1	33	16	49	230133	genes
CDIP1	70	2	72	23542	genes
CDIPT	8	0	8	3427	genes
CDK1	9	1	10	13655	genes
CDK10	12	1	13	7144	genes
CDK11B	13	1	14	19831	genes
CDK12	9	3	12	39624	genes
CDK13	46	7	53	123546	genes
CDK14	434	159	593	678203	genes
CDK16	2	0	2	11403	genes
CDK18	15	37	52	9488	genes
CDK19	58	23	81	166712	genes
CDK2	5	3	8	4684	genes
CDK20	1	2	3	8998	genes
CDK2AP1	24	16	40	10556	genes
CDK2AP2	16	0	16	1804	genes
CDK3	2	0	2	4302	genes
CDK4	6	0	6	2981	genes
CDK5	3	0	3	4307	genes
CDK5R1	213	106	319	247413	genes
CDK5RAP1	8	0	8	34830	genes
CDK5RAP2	166	87	253	184142	genes
CDK5RAP3	12	1	13	9404	genes
CDK6	313	152	465	247623	genes
CDK7	13	1	14	28162	genes
CDK9	10	1	11	4400	genes
CDKAL1	291	79	370	616276	genes
CDKL1	51	54	105	51331	genes
CDKL2	10	1	11	43568	genes
CDKL3	7	4	11	31243	genes
CDKL4	16	15	31	47832	genes
CDKN1A	22	0	22	8284	genes
CDKN1B	21	0	21	5184	genes
CDKN1C	1	0	1	2001	genes
CDKN2AIP	9	0	9	3541	genes
CDKN2B	1	8	9	4916	genes
CDKN2C	1	1	2	4404	genes
CDKN2D	0	1	1	2482	genes
CDKN3	3	0	3	16778	genes
CDNF	17	9	26	21665	genes
CDO1	10	1	11	11521	genes
CDON	34	21	55	63317	genes
CDPF1	25	1	26	8361	genes
CDR2	13	17	30	28478	genes
CDR2L	9	3	12	11563	genes
CDRT4	57	6	63	23378	genes
CDS2	66	38	104	56917	genes
CDSN	1	0	1	4216	genes
CDV3	2	3	5	14189	genes
CDX1	19	1	20	17147	genes
CDYL	234	82	316	96939	genes
CDYL2	50	99	149	164210	genes
CEACAM1	7	8	15	18058	genes
CEACAM19	49	7	56	18380	genes
CEBPD	0	1	1	1595	genes
CEBPE	0	37	37	1413	genes
CEBPG	27	3	30	6955	genes
CEBPZ	8	0	8	24066	genes
CEL	7	14	21	8862	genes
CELA1	3	6	9	14888	genes
CELA2A	7	14	21	16402	genes
CELA3B	5	0	5	7207	genes
CELF1	113	33	146	79173	genes
CELF2	280	205	485	208151	genes
CELF3	16	0	16	14551	genes
CELF4	486	96	582	311588	genes
CELF6	22	0	22	30396	genes
CELSR2	65	0	65	24093	genes
CELSR3	75	17	92	27454	genes
CEMIP2	42	10	52	80956	genes
CENATAC	7	1	8	7997	genes
CEND1	5	0	5	2956	genes
CENPA	21	0	21	6310	genes
CENPC	17	4	21	94085	genes
CENPF	25	2	27	62595	genes
CENPI	4	1	5	68227	genes
CENPK	3	0	3	36745	genes
CENPL	8	9	17	24179	genes
CENPM	13	3	16	11975	genes
CENPN	12	5	17	19286	genes
CENPO	15	14	29	15032	genes
CENPP	73	20	93	235594	genes
CENPQ	3	0	3	17638	genes
CENPS	5	3	8	14652	genes
CENPT	3	1	4	5905	genes
CENPW	2	1	3	8711	genes
CENPX	5	0	5	3627	genes
CEP120	20	6	26	83531	genes
CEP131	5	4	9	13588	genes
CEP135	4	2	6	74388	genes
CEP162	17	30	47	90308	genes
CEP170	61	34	95	130766	genes
CEP19	17	0	17	5646	genes
CEP20	12	18	30	18745	genes
CEP290	19	19	38	58905	genes
CEP295NL	23	38	61	9214	genes
CEP41	26	5	31	47913	genes
CEP43	30	12	42	26957	genes
CEP44	3	0	3	24021	genes
CEP55	9	0	9	20840	genes
CEP57	15	7	22	40027	genes
CEP57L1	27	8	35	85025	genes
CEP76	15	2	17	15239	genes
CEP83	3	5	8	80198	genes
CEP95	46	24	70	36725	genes
CEP97	8	2	10	21293	genes
CEPT1	29	6	35	45065	genes
CERCAM	6	8	14	12102	genes
CERS1	13	5	18	17844	genes
CERS2	17	1	18	8858	genes
CERS3	70	1	71	159440	genes
CERS4	19	2	21	35293	genes
CERS5	14	2	16	29747	genes
CERS6	122	62	184	352556	genes
CERT1	25	5	30	128249	genes
CES1	20	9	29	26176	genes
CES2	6	0	6	12061	genes
CES4A	25	0	25	14464	genes
CES5A	25	10	35	28073	genes
CETN1	4	0	4	884	genes
CETN2	2	0	2	4122	genes
CETN3	3	3	6	17486	genes
CFAP100	66	12	78	26772	genes
CFAP126	14	6	20	32548	genes
CFAP161	15	15	30	21298	genes
CFAP20	7	14	21	13255	genes
CFAP206	11	2	13	35901	genes
CFAP298	5	1	6	11628	genes
CFAP299	121	24	145	706843	genes
CFAP300	13	0	13	27948	genes
CFAP36	2	2	4	29803	genes
CFAP410	40	2	42	11441	genes
CFAP43	29	9	38	99732	genes
CFAP45	34	19	53	29329	genes
CFAP53	17	10	27	42659	genes
CFAP70	17	2	19	81071	genes
CFAP73	46	1	47	8658	genes
CFAP97	8	5	13	25525	genes
CFB	5	0	5	6027	genes
CFD	42	8	50	2537	genes
CFDP1	90	50	140	103719	genes
CFDP2	36	2	38	20088	genes
CFH	21	29	50	133541	genes
CFI	7	20	27	50318	genes
CFL1	0	29	29	3386	genes
CFL2	0	4	4	2653	genes
CFLAR	12	12	24	33562	genes
CFP	0	1	1	5386	genes
CFTR	64	23	87	213805	genes
CGA	13	0	13	16906	genes
CGGBP1	1	0	1	4999	genes
CGN	42	7	49	18646	genes
CGN1	7	1	8	10947	genes
CGREF1	4	4	8	16430	genes
CGRRF1	7	4	11	27458	genes
CH25H	1	0	1	2059	genes
CHAC1	4	0	4	2372	genes
CHAC2	0	3	3	9510	genes
CHAD	52	0	52	4112	genes
CHAF1A	18	11	29	25042	genes
CHAF1B	9	8	17	25599	genes
CHAMP1	11	4	15	9096	genes
[truncated: 121,547 more rows]

## Sheet: TableS7B_Gene_nonCpG_DMCs
Table S7B The distribution of DMCs in the context of CHG and CHH in genes
	symbol	hyper.chg	hypo.chg	num_dmc.chg	anno.width.chg	gene.feature.chg	hyper.chh	hypo.chh	num_dmc.chh	anno.width.chh	gene.feature.chh	num_nCG
1	AACS	1	0	1	52988	genes	6	0	6	52988	genes	7
2	AAR2	0	1	1	20160	genes	0	2	2	20160	genes	3
3	AARS1	0	0	0	0	0	0	1	1	21277	genes	1
4	ABCA9	1	0	1	52192	genes	2	0	2	52192	genes	3
5	ABCB11	0	0	0	0	0	1	0	1	81882	genes	1
6	ABCB7	0	0	0	0	0	1	1	2	158626	genes	2
7	ABCB9	0	1	1	23596	genes	0	1	1	23596	genes	2
8	ABCC1	2	0	2	150264	genes	2	0	2	150264	genes	4
9	ABCC6	1	0	1	66230	genes	0	0	0	0	0	1
10	ABCC8	4	0	4	79017	genes	2	0	2	79017	genes	6
11	ABCD3	0	0	0	0	0	0	1	1	89395	genes	1
12	ABCF2	0	1	1	14687	genes	0	0	0	0	0	1
13	ABCG1	0	0	0	0	0	1	0	1	63046	genes	1
14	ABHD2	0	0	0	0	0	0	2	2	108114	genes	2
15	ABHD4	0	0	0	0	0	1	0	1	12264	genes	1
16	ABHD6	0	1	1	48297	genes	0	1	1	48297	genes	2
17	ABI1	0	0	0	0	0	1	0	1	82919	genes	1
18	ABI2	1	0	1	97578	genes	2	0	2	97578	genes	3
19	ABI3	0	0	0	0	0	1	0	1	9234	genes	1
20	ABL1	0	7	7	141677	genes	0	20	20	141677	genes	27
21	ABLIM3	1	0	1	135391	genes	0	0	0	0	0	1
22	ABO	0	1	1	37884	genes	0	1	1	37884	genes	2
23	ABR	0	0	0	0	0	0	1	1	144093	genes	1
24	ACACA	4	1	5	240943	genes	7	13	20	240943	genes	25
25	ACACB	4	0	4	115072	genes	10	0	10	115072	genes	14
26	ACAD10	1	0	1	47747	genes	3	0	3	47747	genes	4
27	ACAD11	0	0	0	0	0	5	0	5	119037	genes	5
28	ACAD8	0	1	1	13807	genes	0	0	0	0	0	1
29	ACADS	1	0	1	16472	genes	0	0	0	0	0	1
30	ACAT1	0	1	1	29052	genes	0	1	1	29052	genes	2
31	ACBD3	1	0	1	38486	genes	1	0	1	38486	genes	2
32	ACBD6	2	0	2	194447	genes	8	1	9	194447	genes	11
33	ACER3	0	1	1	157020	genes	0	2	2	157020	genes	3
34	ACO2	0	1	1	49047	genes	0	1	1	49047	genes	2
35	ACSBG1	1	0	1	59198	genes	0	0	0	0	0	1
36	ACSF2	0	1	1	31503	genes	0	1	1	31503	genes	2
37	ACSM1	1	1	2	64278	genes	1	1	2	64278	genes	4
38	ACTN1	1	0	1	98077	genes	0	0	0	0	0	1
39	ACTN2	1	0	1	78677	genes	0	2	2	78677	genes	3
40	ACTN4	2	0	2	72992	genes	2	0	2	72992	genes	4
41	ACTR1B	0	0	0	0	0	0	1	1	9675	genes	1
42	ACTR6	0	0	0	0	0	0	1	1	19274	genes	1
43	ADAM10	0	0	0	0	0	1	0	1	144137	genes	1
44	ADAM12	10	4	14	390084	genes	11	6	17	390084	genes	31
45	ADAM22	0	0	0	0	0	2	0	2	231541	genes	2
46	ADAM23	1	0	1	195286	genes	0	0	0	0	0	1
47	ADAMTS14	0	0	0	0	0	2	1	3	93385	genes	3
48	ADAMTS18	0	1	1	143578	genes	2	0	2	143578	genes	3
49	ADAMTS19	0	0	0	0	0	0	1	1	267906	genes	1
50	ADAMTS2	0	0	0	0	0	4	0	4	245248	genes	4
51	ADAMTS3	0	0	0	0	0	2	0	2	278183	genes	2
52	ADAMTS4	0	0	0	0	0	0	1	1	8057	genes	1
53	ADAP2	0	0	0	0	0	0	2	2	25940	genes	2
54	ADARB2	1	0	1	232991	genes	1	0	1	232991	genes	2
55	ADCK1	1	0	1	131116	genes	1	2	3	131116	genes	4
56	ADCY1	0	0	0	0	0	3	2	5	99668	genes	5
57	ADCY7	0	1	1	64719	genes	0	0	0	0	0	1
58	ADCY8	3	2	5	225164	genes	1	1	2	225164	genes	7
59	ADD1	0	0	0	0	0	1	0	1	89791	genes	1
60	ADD3	4	0	4	130899	genes	13	1	14	130899	genes	18
61	ADGB	0	0	0	0	0	1	0	1	194553	genes	1
62	ADGRA1	0	0	0	0	0	2	0	2	34646	genes	2
63	ADGRD1	1	2	3	175198	genes	7	7	14	175198	genes	17
64	ADGRF1	0	0	0	0	0	1	1	2	44627	genes	2
65	ADGRG1	1	0	1	26065	genes	1	0	1	26065	genes	2
66	ADGRL3	0	0	0	0	0	1	0	1	576600	genes	1
67	ADK	1	0	1	517719	genes	0	0	0	0	0	1
68	ADORA1	0	0	0	0	0	1	0	1	40752	genes	1
69	ADPGK	0	0	0	0	0	0	1	1	32620	genes	1
70	ADRA1A	0	0	0	0	0	2	0	2	104615	genes	2
71	ADSS	0	0	0	0	0	0	2	2	32457	genes	2
72	AEBP2	0	0	0	0	0	0	1	1	61721	genes	1
73	AFAP1	1	0	1	149674	genes	0	2	2	149674	genes	3
74	AFAP1L2	2	0	2	116671	genes	0	1	1	116671	genes	3
75	AFF1	0	0	0	0	0	1	0	1	137145	genes	1
76	AFF2	0	0	0	0	0	6	2	8	534044	genes	8
77	AFG1L	1	2	3	196011	genes	0	3	3	196011	genes	6
78	AFMID	0	0	0	0	0	1	1	2	22466	genes	2
79	AGA	0	0	0	0	0	0	1	1	11363	genes	1
80	AGBL3	0	1	1	99579	genes	0	0	0	0	0	1
81	AGFG1	0	0	0	0	0	0	2	2	74639	genes	2
82	AGL	0	0	0	0	0	1	1	2	79368	genes	2
83	AGMO	0	0	0	0	0	1	1	2	389432	genes	2
84	AGO2	0	1	1	82117	genes	1	0	1	82117	genes	2
85	AGPAT3	0	1	1	29023	genes	0	0	0	0	0	1
86	AGPAT4	1	0	1	135848	genes	0	0	0	0	0	1
87	AGPAT5	0	0	0	0	0	0	1	1	47647	genes	1
88	AGPS	0	0	0	0	0	6	0	6	126963	genes	6
89	AHCYL2	0	2	2	191160	genes	1	15	16	191160	genes	18
90	AHSA2	0	0	0	0	0	1	0	1	22306	genes	1
91	AIF1L	1	0	1	25143	genes	0	0	0	0	0	1
92	AJAP1	0	1	1	80915	genes	0	0	0	0	0	1
93	AK1	0	0	0	0	0	1	0	1	9611	genes	1
94	AK5	0	0	0	0	0	1	0	1	258825	genes	1
95	AK8	1	0	1	135808	genes	4	2	6	135808	genes	7
96	AKAP10	0	0	0	0	0	1	0	1	43301	genes	1
97	AKAP2	0	0	0	0	0	0	1	1	44822	genes	1
98	AKAP6	0	1	1	498178	genes	0	1	1	498178	genes	2
99	AKAP7	2	0	2	122535	genes	1	1	2	122535	genes	4
100	AKR1B1	0	2	2	16805	genes	0	0	0	0	0	2
101	AKT3	4	3	7	265675	genes	3	3	6	265675	genes	13
102	ALAD	0	0	0	0	0	0	1	1	9912	genes	1
103	ALDH3A2	0	0	0	0	0	1	0	1	15995	genes	1
104	ALDH3B1	1	0	1	14889	genes	0	0	0	0	0	1
105	ALDH9A1	0	0	0	0	0	1	0	1	29051	genes	1
106	ALG14	0	0	0	0	0	1	0	1	98146	genes	1
107	ALG6	0	0	0	0	0	1	0	1	58600	genes	1
108	ALKBH2	0	0	0	0	0	2	1	3	5775	genes	3
109	ALKBH5	1	0	1	17204	genes	3	0	3	17204	genes	4
110	ALOX5	0	0	0	0	0	0	1	1	46244	genes	1
111	ALOX5AP	2	0	2	22816	genes	0	0	0	0	0	2
112	ALPK2	1	0	1	128482	genes	1	2	3	128482	genes	4
113	AMBP	0	0	0	0	0	0	1	1	12155	genes	1
114	AMBRA1	3	0	3	172574	genes	5	3	8	172574	genes	11
115	AMDHD1	0	0	0	0	0	1	0	1	14717	genes	1
116	AMFR	0	2	2	45512	genes	0	6	6	45512	genes	8
117	AMTN	0	0	0	0	0	3	0	3	13268	genes	3
118	ANAPC5	0	0	0	0	0	2	0	2	35089	genes	2
119	ANAPC7	1	0	1	20671	genes	2	0	2	20671	genes	3
120	ANG	0	0	0	0	0	0	2	2	16574	genes	2
121	ANG2	0	0	0	0	0	0	1	1	11839	genes	1
122	ANGPT1	0	0	0	0	0	0	1	1	301196	genes	1
123	ANGPTL2	0	3	3	22644	genes	0	0	0	0	0	3
124	ANKRD13A	1	0	1	34163	genes	8	2	10	34163	genes	11
125	ANKRD17	0	0	0	0	0	0	2	2	167098	genes	2
126	ANKRD22	0	0	0	0	0	2	0	2	27277	genes	2
127	ANKRD27	0	0	0	0	0	1	0	1	60339	genes	1
128	ANKRD28	1	0	1	134664	genes	1	1	2	134664	genes	3
129	ANKRD33B	1	0	1	95024	genes	0	2	2	95024	genes	3
130	ANKRD55	0	0	0	0	0	0	4	4	109849	genes	4
131	ANO1	0	1	1	94722	genes	0	2	2	94722	genes	3
132	ANO3	0	0	0	0	0	3	2	5	287642	genes	5
133	ANO4	0	0	0	0	0	1	0	1	349285	genes	1
134	ANO5	0	0	0	0	0	1	0	1	85342	genes	1
135	ANTXR1	1	2	3	254606	genes	4	8	12	254606	genes	15
136	ANXA1	0	0	0	0	0	0	1	1	17882	genes	1
137	ANXA11	0	1	1	42164	genes	0	2	2	42164	genes	3
138	ANXA3	0	1	1	71820	genes	1	0	1	71820	genes	2
139	ANXA6	0	0	0	0	0	0	1	1	46808	genes	1
140	ANXA8L1	0	1	1	16262	genes	0	3	3	16262	genes	4
141	AOAH	1	0	1	184766	genes	1	0	1	184766	genes	2
142	AOX1	0	0	0	0	0	0	1	1	71697	genes	1
143	AOX2	0	0	0	0	0	0	2	2	74844	genes	2
144	AOX4	1	0	1	70934	genes	0	0	0	0	0	1
145	AP1B1	0	1	1	48370	genes	0	0	0	0	0	1
146	AP1G1	0	0	0	0	0	1	0	1	81860	genes	1
147	AP1M1	0	0	0	0	0	0	3	3	29604	genes	3
148	AP3B1	1	0	1	235741	genes	0	1	1	235741	genes	2
149	AP3S2	0	0	0	0	0	0	1	1	41074	genes	1
150	AP5Z1	0	1	1	15676	genes	0	1	1	15676	genes	2
151	APAF1	1	0	1	82495	genes	1	0	1	82495	genes	2
152	APBA2	0	0	0	0	0	1	0	1	113765	genes	1
153	APBB2	0	0	0	0	0	1	1	2	381176	genes	2
154	APC	0	0	0	0	0	0	1	1	95695	genes	1
155	APH1B	0	0	0	0	0	0	2	2	40740	genes	2
156	API5	0	0	0	0	0	1	0	1	26778	genes	1
157	APIP	0	0	0	0	0	1	0	1	24114	genes	1
158	APLP1	0	0	0	0	0	1	0	1	9660	genes	1
159	APMAP	1	0	1	28811	genes	0	0	0	0	0	1
160	APOO	0	0	0	0	0	0	1	1	53435	genes	1
161	APP	1	2	3	312191	genes	1	9	10	312191	genes	13
162	APPL2	1	0	1	51872	genes	0	1	1	51872	genes	2
163	APTX	0	0	0	0	0	0	1	1	15726	genes	1
164	AQP7	0	0	0	0	0	0	1	1	16607	genes	1
165	AQP8	1	0	1	10185	genes	0	0	0	0	0	1
166	AR	0	0	0	0	0	1	0	1	209290	genes	1
167	AREG	0	1	1	12158	genes	0	0	0	0	0	1
168	ARF1	1	0	1	18059	genes	1	0	1	18059	genes	2
169	ARF2	1	0	1	18539	genes	0	0	0	0	0	1
170	ARFGEF1	0	0	0	0	0	0	1	1	128587	genes	1
171	ARHGAP12	0	0	0	0	0	0	1	1	117289	genes	1
172	ARHGAP15	1	3	4	697408	genes	7	1	8	697408	genes	12
173	ARHGAP25	0	0	0	0	0	1	0	1	92145	genes	1
174	ARHGAP26	0	0	0	0	0	0	5	5	468759	genes	5
175	ARHGAP29	0	0	0	0	0	0	1	1	81403	genes	1
176	ARHGAP30	0	0	0	0	0	1	1	2	14972	genes	2
177	ARHGAP31	0	0	0	0	0	2	0	2	119086	genes	2
178	ARHGAP32	0	1	1	128781	genes	0	0	0	0	0	1
179	ARHGAP35	0	1	1	72290	genes	0	0	0	0	0	1
180	ARHGAP45	0	0	0	0	0	1	0	1	12779	genes	1
181	ARHGEF10L	5	0	5	152190	genes	7	0	7	152190	genes	12
182	ARHGEF17	1	0	1	57979	genes	0	0	0	0	0	1
183	ARHGEF26	0	0	0	0	0	1	1	2	137070	genes	2
184	ARHGEF40	0	0	0	0	0	1	0	1	19188	genes	1
185	ARHGEF7	0	0	0	0	0	1	2	3	94266	genes	3
186	ARHGEF9	0	0	0	0	0	1	0	1	316353	genes	1
187	ARID4B	1	0	1	138281	genes	2	1	3	138281	genes	4
188	ARL15	0	1	1	459416	genes	3	0	3	459416	genes	4
189	ARL5A	0	0	0	0	0	0	1	1	22938	genes	1
190	ARMC2	2	2	4	119790	genes	1	5	6	119790	genes	10
191	ARMC8	0	0	0	0	0	0	1	1	107057	genes	1
192	ARMC9	1	0	1	154031	genes	0	0	0	0	0	1
193	ARMH1	0	0	0	0	0	1	0	1	62382	genes	1
194	ARMH4	0	0	0	0	0	0	1	1	141704	genes	1
195	ARNT	1	0	1	64687	genes	1	0	1	64687	genes	2
196	ARNT2	1	0	1	192654	genes	0	0	0	0	0	1
197	ARNTL	1	0	1	107977	genes	2	0	2	107977	genes	3
198	ARRB1	0	0	0	0	0	0	1	1	72588	genes	1
199	ARSB	1	0	1	180721	genes	0	0	0	0	0	1
200	ARSL	1	0	1	14764	genes	0	0	0	0	0	1
201	ASAH1	0	0	0	0	0	1	0	1	31628	genes	1
202	ASB17	0	0	0	0	0	0	1	1	17752	genes	1
203	ASB2	1	0	1	48874	genes	1	2	3	48874	genes	4
204	ASB4	0	0	0	0	0	0	2	2	77130	genes	2
205	ASB5	0	0	0	0	0	2	0	2	40805	genes	2
206	ASB6	1	0	1	5228	genes	0	0	0	0	0	1
207	ASCC2	2	0	2	35997	genes	1	0	1	35997	genes	3
208	ASCC3	0	1	1	332797	genes	0	1	1	332797	genes	2
209	ASH1L	0	1	1	176646	genes	0	1	1	176646	genes	2
210	ASIC2	1	1	2	1206384	genes	4	11	15	1206384	genes	17
211	ASMTL	1	0	1	20551	genes	0	1	1	20551	genes	2
212	ASNS	0	0	0	0	0	0	1	1	147458	genes	1
213	ASPH	0	0	0	0	0	0	2	2	187375	genes	2
214	ASPM	0	0	0	0	0	0	1	1	60128	genes	1
215	ASS1	1	0	1	51997	genes	0	0	0	0	0	1
216	ASZ1	0	0	0	0	0	1	0	1	75804	genes	1
217	ATAD1	0	0	0	0	0	0	3	3	40881	genes	3
218	ATAD5	0	0	0	0	0	1	0	1	35562	genes	1
219	ATF2	0	0	0	0	0	0	1	1	81377	genes	1
220	ATF3	0	0	0	0	0	0	1	1	12928	genes	1
221	ATG10	1	1	2	262786	genes	3	2	5	262786	genes	7
222	ATG13	0	0	0	0	0	1	0	1	41757	genes	1
223	ATG14	0	0	0	0	0	2	0	2	36893	genes	2
224	ATG2A	0	1	1	21048	genes	0	0	0	0	0	1
225	ATG3	0	0	0	0	0	0	1	1	34595	genes	1
226	ATG5	2	0	2	113482	genes	0	0	0	0	0	2
227	ATG7	0	0	0	0	0	1	2	3	274102	genes	3
228	ATP13A3	0	0	0	0	0	0	1	1	54731	genes	1
229	ATP1A1	0	0	0	0	0	1	0	1	32330	genes	1
230	ATP1B3	0	0	0	0	0	1	0	1	36165	genes	1
231	ATP1B4	0	1	1	20827	genes	0	0	0	0	0	1
232	ATP2A1	1	0	1	17335	genes	0	0	0	0	0	1
233	ATP2A3	0	0	0	0	0	1	1	2	34078	genes	2
234	ATP2B1	3	0	3	129818	genes	6	0	6	129818	genes	9
235	ATP2B2	0	1	1	299770	genes	5	0	5	299770	genes	6
236	ATP2B4	1	0	1	50186	genes	0	0	0	0	0	1
237	ATP5MF	0	0	0	0	0	1	0	1	5091	genes	1
238	ATP6V0A1	0	2	2	49643	genes	0	0	0	0	0	2
239	ATP6V0D1	0	0	0	0	0	1	0	1	39067	genes	1
240	ATP6V1E1	0	0	0	0	0	2	0	2	13632	genes	2
241	ATP6V1E2	0	1	1	7945	genes	0	0	0	0	0	1
242	ATP8A1	2	0	2	234155	genes	9	3	12	234155	genes	14
243	ATP8B1	0	1	1	107694	genes	0	1	1	107694	genes	2
244	ATP8B2	0	0	0	0	0	1	0	1	19577	genes	1
245	ATRN	0	0	0	0	0	1	1	2	186412	genes	2
246	ATXN10	6	0	6	140689	genes	11	1	12	140689	genes	18
247	ATXN2L	0	0	0	0	0	1	0	1	10928	genes	1
248	AUH	0	0	0	0	0	1	0	1	182686	genes	1
249	AUNIP	0	0	0	0	0	0	2	2	12437	genes	2
250	AXIN2	0	1	1	25957	genes	0	0	0	0	0	1
251	AZGP1	0	0	0	0	0	1	0	1	4490	genes	1
252	B4GALNT3	1	0	1	96260	genes	5	1	6	96260	genes	7
253	B4GALT1	0	0	0	0	0	2	0	2	53165	genes	2
254	BABAM2	0	0	0	0	0	0	1	1	421830	genes	1
255	BACE2	0	0	0	0	0	0	2	2	105549	genes	2
256	BAIAP2	0	0	0	0	0	0	2	2	63582	genes	2
257	BAIAP2L2	0	0	0	0	0	2	0	2	29580	genes	2
258	BATF3	0	0	0	0	0	0	1	1	13321	genes	1
259	BBS12	0	0	0	0	0	1	0	1	12468	genes	1
260	BBS2	1	0	1	25996	genes	4	0	4	25996	genes	5
261	BBS5	1	0	1	20998	genes	0	0	0	0	0	1
262	BBS7	0	0	0	0	0	1	2	3	38979	genes	3
263	BCAR3	0	2	2	221294	genes	0	7	7	221294	genes	9
264	BCAT1	0	0	0	0	0	0	3	3	117526	genes	3
265	BCCIP	0	0	0	0	0	4	0	4	16653	genes	4
266	BCKDHB	0	1	1	270674	genes	0	0	0	0	0	1
267	BCL11A	0	0	0	0	0	0	1	1	101398	genes	1
268	BCL2	0	0	0	0	0	3	0	3	191446	genes	3
269	BCL2L1	0	0	0	0	0	2	0	2	51258	genes	2
270	BCL2L13	1	0	1	51134	genes	3	1	4	51134	genes	5
271	BCL2L14	0	0	0	0	0	1	0	1	23263	genes	1
272	BCL9L	0	0	0	0	0	1	0	1	10630	genes	1
273	BCNT2	0	0	0	0	0	0	1	1	39810	genes	1
274	BCO1	0	0	0	0	0	0	1	1	30846	genes	1
275	BCO2	0	0	0	0	0	1	1	2	67677	genes	2
276	BDA20	0	0	0	0	0	1	0	1	5542	genes	1
277	BDKRB2	0	1	1	40530	genes	0	0	0	0	0	1
278	BECN1	0	0	0	0	0	0	1	1	10176	genes	1
279	BEND4	1	0	1	28852	genes	1	0	1	28852	genes	2
280	BID	1	1	2	17509	genes	1	0	1	17509	genes	3
281	BIN1	0	1	1	56706	genes	0	0	0	0	0	1
282	BIVM	0	0	0	0	0	1	1	2	46171	genes	2
283	BLCAP	0	0	0	0	0	2	0	2	10486	genes	2
284	BLK	0	0	0	0	0	0	1	1	51835	genes	1
285	BLNK	1	0	1	91179	genes	0	0	0	0	0	1
286	BLZF1	3	0	3	22295	genes	5	0	5	22295	genes	8
287	BMF	1	0	1	14591	genes	0	0	0	0	0	1
288	BMP2K	1	0	1	118284	genes	2	1	3	118284	genes	4
289	BMP7	1	1	2	85425	genes	0	1	1	85425	genes	3
290	BMP8A	1	0	1	40667	genes	0	1	1	40667	genes	2
291	BMPR1A	0	0	0	0	0	0	1	1	58118	genes	1
292	BMPR2	0	0	0	0	0	0	2	2	152703	genes	2
293	BMX	0	1	1	37469	genes	0	0	0	0	0	1
294	BNIP3	0	0	0	0	0	0	1	1	3964	genes	1
295	BNIP3L	0	0	0	0	0	0	1	1	23370	genes	1
296	BOD1	0	0	0	0	0	0	1	1	12228	genes	1
297	BOLL	0	0	0	0	0	0	1	1	68863	genes	1
298	BORCS5	0	0	0	0	0	4	0	4	97372	genes	4
299	BPGM	0	2	2	31383	genes	1	0	1	31383	genes	3
300	BPHL	1	0	1	21776	genes	0	0	0	0	0	1
301	BPIFA2A	1	0	1	42080	genes	0	0	0	0	0	1
302	BPIFB1	0	0	0	0	0	1	0	1	21152	genes	1
303	BPIFB5	0	0	0	0	0	1	0	1	18359	genes	1
304	BRAP	1	0	1	30613	genes	3	1	4	30613	genes	5
305	BRAT1	0	1	1	10388	genes	0	1	1	10388	genes	2
306	BRD3	0	1	1	33693	genes	0	0	0	0	0	1
307	BREH1	0	0	0	0	0	0	1	1	26629	genes	1
308	BRI3	0	0	0	0	0	0	1	1	6901	genes	1
309	BRI3BP	0	0	0	0	0	2	0	2	21125	genes	2
310	BRINP3	0	1	1	485844	genes	3	2	5	485844	genes	6
311	BRMS1L	0	0	0	0	0	0	1	1	44033	genes	1
312	BRPF1	0	0	0	0	0	1	0	1	13387	genes	1
313	BRWD1	1	0	1	123688	genes	1	0	1	123688	genes	2
314	BSCL2	0	0	0	0	0	1	0	1	9530	genes	1
315	BSDC1	0	0	0	0	0	1	0	1	22908	genes	1
316	BSPRY	0	0	0	0	0	0	3	3	24501	genes	3
317	BTBD11	1	0	1	331115	genes	0	0	0	0	0	1
318	BTBD16	0	1	1	52672	genes	0	0	0	0	0	1
319	BTG3	0	0	0	0	0	1	0	1	18958	genes	1
320	BTRC	1	0	1	171386	genes	0	1	1	171386	genes	2
321	BUD23	0	0	0	0	0	0	1	1	11352	genes	1
322	C15H11orf34	0	0	0	0	0	0	1	1	12110	genes	1
323	C15H11orf49	0	0	0	0	0	2	0	2	210598	genes	2
324	C15H11orf58	0	0	0	0	0	0	1	1	26525	genes	1
325	C16H1orf100	0	1	1	36095	genes	1	2	3	36095	genes	4
326	C16H1orf105	5	0	5	32969	genes	14	0	14	32969	genes	19
327	C17H4orf45	0	0	0	0	0	4	0	4	133478	genes	4
328	C19H17orf78	0	0	0	0	0	0	1	1	12941	genes	1
329	C1GALT1	0	0	0	0	0	0	4	4	43840	genes	4
330	C1H21orf62	2	0	2	19410	genes	3	0	3	19410	genes	5
331	C1H21orf91	0	1	1	28820	genes	0	1	1	28820	genes	2
332	C1H3orf70	0	0	0	0	0	1	0	1	120735	genes	1
333	C21H15orf40	0	0	0	0	0	1	0	1	6286	genes	1
334	C25H7orf26	0	0	0	0	0	0	1	1	11185	genes	1
335	C25H7orf50	0	0	0	0	0	0	1	1	67368	genes	1
336	C26H10orf120	0	0	0	0	0	1	0	1	3000	genes	1
337	C28H1orf198	1	0	1	32069	genes	0	0	0	0	0	1
338	C2CD3	0	0	0	0	0	1	0	1	17030	genes	1
339	C2CD6	1	0	1	123500	genes	2	0	2	123500	genes	3
340	C2H2orf76	0	2	2	84423	genes	1	0	1	84423	genes	3
341	C2H2orf80	1	0	1	23374	genes	0	0	0	0	0	1
342	C3H1orf141	0	1	1	45089	genes	1	3	4	45089	genes	5
343	C3H1orf87	1	0	1	80949	genes	2	0	2	80949	genes	3
344	C6H4orf19	0	0	0	0	0	1	0	1	78562	genes	1
345	C8H9orf43	0	0	0	0	0	1	0	1	17875	genes	1
346	C8H9orf85	0	0	0	0	0	1	0	1	60040	genes	1
347	C9H6orf118	1	0	1	24056	genes	1	0	1	24056	genes	2
348	CA10	0	0	0	0	0	2	1	3	845692	genes	3
349	CAB39	2	1	3	102414	genes	1	0	1	102414	genes	4
350	CACNA1B	0	0	0	0	0	3	1	4	210777	genes	4
351	CACNA1D	0	0	0	0	0	1	0	1	345703	genes	1
352	CACNA1E	0	0	0	0	0	0	1	1	328985	genes	1
353	CACNA2D1	0	0	0	0	0	2	0	2	519478	genes	2
354	CACNA2D3	2	0	2	893877	genes	1	1	2	893877	genes	4
355	CACNB2	0	0	0	0	0	3	0	3	281524	genes	3
356	CACNB4	0	0	0	0	0	2	0	2	271796	genes	2
357	CADM1	0	1	1	350118	genes	4	1	5	350118	genes	6
358	CADPS	0	0	0	0	0	0	2	2	470794	genes	2
359	CADPS2	0	1	1	580136	genes	1	3	4	580136	genes	5
360	CALCR	0	1	1	110105	genes	0	7	7	110105	genes	8
361	CALD1	1	0	1	105369	genes	1	0	1	105369	genes	2
362	CALM2	0	0	0	0	0	3	0	3	12935	genes	3
363	CALN1	0	0	0	0	0	3	1	4	454776	genes	4
364	CAMK1	0	0	0	0	0	1	0	1	10578	genes	1
365	CAMK2B	0	0	0	0	0	4	0	4	90633	genes	4
366	CAMK2D	6	2	8	307246	genes	6	3	9	307246	genes	17
367	CAMKK2	0	3	3	31766	genes	0	0	0	0	0	3
368	CAMKMT	0	1	1	427562	genes	0	3	3	427562	genes	4
369	CAMKV	0	0	0	0	0	0	1	1	11519	genes	1
370	CAP1	0	0	0	0	0	1	0	1	28614	genes	1
371	CAPN1	0	1	1	27086	genes	1	3	4	27086	genes	5
372	CAPN13	0	3	3	76001	genes	2	1	3	76001	genes	6
373	CAPN5	1	0	1	57216	genes	1	9	10	57216	genes	11
374	CAPN7	4	0	4	51719	genes	4	1	5	51719	genes	9
375	CAPZB	1	0	1	137881	genes	1	0	1	137881	genes	2
376	CARD11	1	0	1	106448	genes	2	3	5	106448	genes	6
377	CARD19	1	0	1	15439	genes	0	0	0	0	0	1
378	CARD9	0	0	0	0	0	0	1	1	7066	genes	1
379	CARMIL1	2	0	2	306288	genes	5	0	5	306288	genes	7
380	CARS1	0	2	2	52637	genes	1	0	1	52637	genes	3
381	CARS2	0	0	0	0	0	1	0	1	19126	genes	1
382	CASP4	0	0	0	0	0	1	0	1	19459	genes	1
383	CASP8	2	0	2	23668	genes	3	0	3	23668	genes	5
384	CASTOR1	0	0	0	0	0	1	0	1	4517	genes	1
385	CBLB	0	0	0	0	0	0	1	1	221123	genes	1
386	CBLIF	0	0	0	0	0	0	2	2	19073	genes	2
387	CCAR2	0	0	0	0	0	1	0	1	14650	genes	1
388	CCDC113	0	0	0	0	0	0	3	3	33427	genes	3
389	CCDC117	0	1	1	19504	genes	0	0	0	0	0	1
390	CCDC146	0	0	0	0	0	4	0	4	118110	genes	4
391	CCDC149	0	1	1	117154	genes	0	2	2	117154	genes	3
392	CCDC157	0	0	0	0	0	0	1	1	12191	genes	1
393	CCDC172	0	0	0	0	0	1	0	1	57698	genes	1
394	CCDC181	1	0	1	15724	genes	2	0	2	15724	genes	3
395	CCDC183	1	0	1	8129	genes	0	0	0	0	0	1
396	CCDC197	1	0	1	13021	genes	0	0	0	0	0	1
397	CCDC47	0	1	1	20025	genes	0	0	0	0	0	1
398	CCDC77	0	0	0	0	0	0	1	1	26724	genes	1
399	CCDC82	0	0	0	0	0	0	1	1	31583	genes	1
400	CCDC83	0	0	0	0	0	0	2	2	52154	genes	2
401	CCDC85A	0	0	0	0	0	1	0	1	225289	genes	1
402	CCDC9	0	1	1	10674	genes	0	0	0	0	0	1
403	CCDC90B	0	0	0	0	0	1	0	1	26502	genes	1
404	CCDC92	1	0	1	35932	genes	3	0	3	35932	genes	4
405	CCL11	0	0	0	0	0	1	0	1	2898	genes	1
406	CCL24	1	0	1	3315	genes	0	0	0	0	0	1
407	CCL5	1	0	1	6748	genes	1	0	1	6748	genes	2
408	CCM2	0	0	0	0	0	1	0	1	51108	genes	1
409	CCNC	1	0	1	25732	genes	1	0	1	25732	genes	2
410	CCND2	0	0	0	0	0	2	0	2	22874	genes	2
411	CCNF	0	0	0	0	0	0	1	1	17769	genes	1
412	CCSER1	2	0	2	837665	genes	4	0	4	837665	genes	6
413	CCT3	0	0	0	0	0	1	0	1	14559	genes	1
414	CCT4	0	0	0	0	0	1	0	1	12629	genes	1
415	CD101	0	0	0	0	0	1	0	1	36404	genes	1
416	CD19	0	0	0	0	0	0	1	1	6402	genes	1
417	CD247	1	2	3	83969	genes	5	1	6	83969	genes	9
418	CD300LB	0	0	0	0	0	1	0	1	10336	genes	1
419	CD34	0	0	0	0	0	4	0	4	23094	genes	4
420	CD82	0	0	0	0	0	1	0	1	55811	genes	1
421	CD83	0	0	0	0	0	1	0	1	19691	genes	1
422	CD99	0	0	0	0	0	1	1	2	30175	genes	2
423	CD99L2	0	0	0	0	0	0	1	1	121537	genes	1
424	CDA	0	0	0	0	0	3	0	3	20933	genes	3
425	CDADC1	0	1	1	28387	genes	0	0	0	0	0	1
426	CDC14B	1	0	1	120333	genes	0	0	0	0	0	1
427	CDC25B	0	0	0	0	0	0	1	1	9598	genes	1
428	CDC40	0	0	0	0	0	2	0	2	48067	genes	2
429	CDC42BPA	0	0	0	0	0	1	0	1	292599	genes	1
430	CDC42SE2	0	0	0	0	0	1	1	2	119011	genes	2
431	CDC45	0	1	1	14963	genes	0	0	0	0	0	1
432	CDCA2	0	0	0	0	0	0	1	1	43208	genes	1
433	CDCA7L	0	0	0	0	0	1	0	1	43206	genes	1
434	CDCA8	0	0	0	0	0	2	0	2	15066	genes	2
435	CDH13	1	1	2	1016104	genes	4	2	6	1016104	genes	8
436	CDH17	5	0	5	88842	genes	10	0	10	88842	genes	15
437	CDH18	0	0	0	0	0	1	0	1	603555	genes	1
438	CDH23	0	1	1	393222	genes	1	0	1	393222	genes	2
439	CDH6	0	1	1	144982	genes	0	0	0	0	0	1
440	CDH9	0	1	1	138593	genes	0	1	1	138593	genes	2
441	CDK14	1	4	5	678203	genes	11	12	23	678203	genes	28
442	CDK19	0	1	1	166712	genes	1	0	1	166712	genes	2
443	CDK5R1	0	0	0	0	0	4	4	8	247413	genes	8
444	CDK6	1	0	1	247623	genes	3	2	5	247623	genes	6
445	CDKAL1	0	0	0	0	0	2	0	2	616276	genes	2
446	CDS2	0	2	2	56917	genes	4	0	4	56917	genes	6
447	CDYL	0	0	0	0	0	4	0	4	96939	genes	4
448	CDYL2	0	0	0	0	0	0	3	3	164210	genes	3
449	CELA3B	0	0	0	0	0	1	0	1	7207	genes	1
450	CELF2	0	0	0	0	0	0	2	2	208151	genes	2
451	CELF4	0	2	2	311588	genes	1	2	3	311588	genes	5
452	CEND1	0	1	1	2956	genes	0	0	0	0	0	1
453	CENPC	0	0	0	0	0	0	1	1	94085	genes	1
454	CENPI	0	0	0	0	0	4	0	4	68227	genes	4
455	CENPP	0	1	1	235594	genes	0	0	0	0	0	1
456	CEP120	0	0	0	0	0	1	0	1	83531	genes	1
457	CEP131	1	0	1	13588	genes	0	0	0	0	0	1
458	CEP162	0	0	0	0	0	0	1	1	90308	genes	1
459	CEP170	1	0	1	130766	genes	0	0	0	0	0	1
460	CEP290	0	0	0	0	0	0	1	1	58905	genes	1
461	CEP55	0	0	0	0	0	0	1	1	20840	genes	1
462	CEP57	0	1	1	40027	genes	0	0	0	0	0	1
463	CERS3	1	0	1	159440	genes	0	0	0	0	0	1
464	CES5A	0	2	2	28073	genes	0	11	11	28073	genes	13
465	CFAP299	0	0	0	0	0	1	0	1	706843	genes	1
466	CFAP300	0	0	0	0	0	1	0	1	27948	genes	1
467	CFAP410	0	1	1	11441	genes	0	1	1	11441	genes	2
468	CFAP53	0	0	0	0	0	1	0	1	42659	genes	1
469	CFDP1	4	0	4	103719	genes	6	0	6	103719	genes	10
470	CFH	1	0	1	133541	genes	2	2	4	133541	genes	5
471	CFLAR	0	0	0	0	0	0	1	1	33562	genes	1
472	CFTR	1	0	1	213805	genes	3	0	3	213805	genes	4
473	CGN1	1	0	1	10947	genes	0	0	0	0	0	1
474	CHAF1B	0	0	0	0	0	4	0	4	25599	genes	4
475	CHCHD3	8	0	8	292530	genes	20	3	23	292530	genes	31
476	CHD1	0	0	0	0	0	0	1	1	72545	genes	1
477	CHD6	4	2	6	199204	genes	15	7	22	199204	genes	28
478	CHD8	1	0	1	44853	genes	1	1	2	44853	genes	3
479	CHD9	2	1	3	226602	genes	3	0	3	226602	genes	6
480	CHDH	0	1	1	24712	genes	0	0	0	0	0	1
481	CHEK2	1	1	2	35728	genes	2	1	3	35728	genes	5
482	CHFR	0	0	0	0	0	2	0	2	24728	genes	2
483	CHL1	0	0	0	0	0	2	0	2	221719	genes	2
484	CHMP3	0	0	0	0	0	1	0	1	42914	genes	1
485	CHN1	0	0	0	0	0	1	0	1	202250	genes	1
486	CHP2	0	1	1	3420	genes	0	1	1	3420	genes	2
487	CHRDL2	0	1	1	33560	genes	1	0	1	33560	genes	2
488	CHRM3	0	0	0	0	0	1	3	4	647901	genes	4
489	CHRNA7	0	0	0	0	0	0	4	4	135526	genes	4
490	CHST11	0	0	0	0	0	2	1	3	261936	genes	3
491	CHST12	0	0	0	0	0	1	0	1	18350	genes	1
492	CHTF18	0	0	0	0	0	1	0	1	8088	genes	1
493	CHUK	0	0	0	0	0	1	2	3	42265	genes	3
494	CIAPIN1	0	1	1	12763	genes	0	0	0	0	0	1
495	CIDEC	0	0	0	0	0	1	0	1	9283	genes	1
496	CILK1	0	0	0	0	0	2	1	3	43297	genes	3
497	CISD1	0	0	0	0	0	1	0	1	18172	genes	1
498	CKAP5	0	0	0	0	0	0	1	1	104938	genes	1
499	CLASP1	0	0	0	0	0	0	2	2	272989	genes	2
500	CLASP2	0	0	0	0	0	0	1	1	175596	genes	1
501	CLCN1	1	0	1	36627	genes	1	0	1	36627	genes	2
502	CLDN10	2	0	2	104805	genes	1	0	1	104805	genes	3
503	CLDN12	1	0	1	14261	genes	0	0	0	0	0	1
504	CLEC12A	0	0	0	0	0	1	0	1	12517	genes	1
505	CLEC1B	0	0	0	0	0	1	0	1	9080	genes	1
506	CLEC5A	0	0	0	0	0	0	2	2	10881	genes	2
507	CLIC5	0	0	0	0	0	1	1	2	165704	genes	2
508	CLIP4	0	0	0	0	0	0	3	3	73404	genes	3
509	CLK2	0	0	0	0	0	1	0	1	8922	genes	1
510	CLK3	0	0	0	0	0	0	2	2	13971	genes	2
511	CLK4	0	0	0	0	0	2	0	2	21735	genes	2
512	CLN3	0	0	0	0	0	0	2	2	12176	genes	2
513	CLPB	0	1	1	142211	genes	1	4	5	142211	genes	6
514	CLRN3	0	0	0	0	0	2	0	2	16409	genes	2
515	CLSTN2	1	4	5	722477	genes	7	11	18	722477	genes	23
516	CLTC	0	0	0	0	0	1	0	1	64735	genes	1
517	CLVS1	0	1	1	157724	genes	0	0	0	0	0	1
518	CLVS2	1	0	1	76860	genes	2	0	2	76860	genes	3
519	CMTM7	0	1	1	47895	genes	0	0	0	0	0	1
520	CMYA5	0	0	0	0	0	0	1	1	98084	genes	1
521	CNGB1	0	0	0	0	0	0	1	1	68713	genes	1
522	CNIH3	1	0	1	135929	genes	1	0	1	135929	genes	2
523	CNKSR3	1	0	1	73611	genes	0	0	0	0	0	1
524	CNNM2	1	2	3	177455	genes	1	4	5	177455	genes	8
525	CNNM4	0	1	1	37644	genes	0	0	0	0	0	1
526	CNOT1	1	0	1	82995	genes	0	3	3	82995	genes	4
527	CNOT4	0	0	0	0	0	4	0	4	151649	genes	4
528	CNOT6	0	0	0	0	0	0	1	1	81010	genes	1
529	CNOT6L	0	0	0	0	0	0	2	2	115506	genes	2
530	CNR1	1	0	1	29536	genes	1	0	1	29536	genes	2
531	CNRIP1	0	0	0	0	0	0	1	1	24255	genes	1
532	CNTN5	0	0	0	0	0	0	7	7	538022	genes	7
533	CNTNAP4	1	0	1	283596	genes	1	2	3	283596	genes	4
534	COA1	1	0	1	94645	genes	0	0	0	0	0	1
535	COG7	0	3	3	90159	genes	0	6	6	90159	genes	9
536	COL12A1	0	0	0	0	0	0	2	2	115103	genes	2
537	COL13A1	1	0	1	152386	genes	3	1	4	152386	genes	5
538	COL15A1	2	0	2	103192	genes	2	0	2	103192	genes	4
539	COL18A1	0	0	0	0	0	1	0	1	52305	genes	1
540	COL1A1	1	0	1	16755	genes	0	0	0	0	0	1
541	COL26A1	1	0	1	162783	genes	0	1	1	162783	genes	2
542	COL27A1	0	3	3	151439	genes	0	1	1	151439	genes	4
543	COL6A1	0	4	4	19247	genes	0	2	2	19247	genes	6
544	COL6A2	0	0	0	0	0	0	1	1	28795	genes	1
545	COL8A1	0	0	0	0	0	0	1	1	171434	genes	1
546	COLQ	0	0	0	0	0	1	0	1	65991	genes	1
547	COMMD1	0	0	0	0	0	5	2	7	171449	genes	7
548	COMMD10	1	1	2	184298	genes	4	0	4	184298	genes	6
549	COMMD7	2	0	2	28145	genes	1	0	1	28145	genes	3
550	COMMD9	1	0	1	13026	genes	0	0	0	0	0	1
551	COP1	1	0	1	224234	genes	2	1	3	224234	genes	4
552	COPA	0	1	1	44059	genes	0	0	0	0	0	1
553	COPB1	0	0	0	0	0	2	0	2	34561	genes	2
554	COPB2	1	0	1	33002	genes	0	0	0	0	0	1
555	COPS3	0	0	0	0	0	2	0	2	18181	genes	2
556	COPS7B	0	0	0	0	0	1	1	2	22960	genes	2
557	COPS8	0	1	1	13044	genes	0	0	0	0	0	1
558	COQ3	0	1	1	24048	genes	1	0	1	24048	genes	2
559	COQ7	0	0	0	0	0	0	3	3	13673	genes	3
560	COQ8A	0	0	0	0	0	1	0	1	47420	genes	1
561	CORO1C	0	0	0	0	0	2	1	3	74695	genes	3
562	COX4I2	0	0	0	0	0	1	0	1	5293	genes	1
563	COX5A	0	1	1	10947	genes	0	0	0	0	0	1
564	CP	0	0	0	0	0	0	1	1	47335	genes	1
565	CPA5	0	0	0	0	0	0	1	1	54291	genes	1
566	CPB2	0	0	0	0	0	3	0	3	57697	genes	3
567	CPNE1	2	0	2	35913	genes	5	0	5	35913	genes	7
568	CPNE3	0	0	0	0	0	2	0	2	46497	genes	2
569	CPNE8	1	0	1	278742	genes	0	0	0	0	0	1
570	CPPED1	1	1	2	104716	genes	1	3	4	104716	genes	6
571	CPQ	1	0	1	560471	genes	2	2	4	560471	genes	5
572	CPSF3	1	0	1	33484	genes	8	0	8	33484	genes	9
573	CPT1A	1	0	1	60572	genes	1	1	2	60572	genes	3
574	CPT2	0	0	0	0	0	1	0	1	24133	genes	1
575	CPXM2	1	0	1	136940	genes	4	0	4	136940	genes	5
576	CPZ	1	0	1	23428	genes	6	0	6	23428	genes	7
577	CRB1	0	0	0	0	0	4	2	6	213682	genes	6
578	CREB3L1	0	0	0	0	0	0	1	1	36039	genes	1
579	CREBL2	0	0	0	0	0	0	1	1	29459	genes	1
580	CREG1	1	0	1	11388	genes	2	0	2	11388	genes	3
581	CRLF3	0	0	0	0	0	1	1	2	41530	genes	2
582	CRTAC1	1	8	9	151677	genes	0	6	6	151677	genes	15
583	CRTAM	0	0	0	0	0	1	0	1	28840	genes	1
584	CRTC1	0	0	0	0	0	0	1	1	85067	genes	1
585	CRX	0	1	1	11598	genes	0	2	2	11598	genes	3
586	CRYAB	0	1	1	3227	genes	0	0	0	0	0	1
587	CRYBB1	0	0	0	0	0	1	0	1	11398	genes	1
588	CRYBB3	0	0	0	0	0	1	0	1	6644	genes	1
589	CRYZL1	1	0	1	33622	genes	0	0	0	0	0	1
590	CSF2RB	0	0	0	0	0	1	0	1	21198	genes	1
591	CSF3	0	0	0	0	0	1	0	1	2311	genes	1
592	CSGALNACT1	1	1	2	175111	genes	1	1	2	175111	genes	4
593	CSH2	0	0	0	0	0	0	1	1	12630	genes	1
594	CSN3	1	0	1	13057	genes	0	0	0	0	0	1
595	CSNK1G1	0	0	0	0	0	1	1	2	141267	genes	2
596	CSNK1G2	0	0	0	0	0	2	0	2	24252	genes	2
597	CSPP1	0	0	0	0	0	0	1	1	111155	genes	1
598	CSRP3	0	0	0	0	0	1	0	1	20678	genes	1
599	CSTB	0	0	0	0	0	1	0	1	4237	genes	1
600	CSTF1	0	0	0	0	0	0	1	1	13660	genes	1
601	CSTF2	0	0	0	0	0	1	0	1	31726	genes	1
602	CTBP2	1	0	1	35608	genes	0	1	1	35608	genes	2
603	CTDSPL	1	0	1	121356	genes	1	0	1	121356	genes	2
604	CTDSPL2	1	1	2	71685	genes	0	0	0	0	0	2
605	CTH	0	0	0	0	0	1	0	1	27087	genes	1
606	CTNNA3	3	0	3	1867672	genes	5	0	5	1867672	genes	8
607	CTNNAL1	2	0	2	56671	genes	2	0	2	56671	genes	4
608	CTNNBL1	0	1	1	166823	genes	2	4	6	166823	genes	7
609	CTNS	0	0	0	0	0	1	0	1	20151	genes	1
610	CTSD	1	0	1	9434	genes	4	0	4	9434	genes	5
611	CTSH	0	0	0	0	0	1	0	1	20725	genes	1
612	CTXN3	0	0	0	0	0	0	1	1	12332	genes	1
613	CUBN	2	1	3	259194	genes	4	3	7	259194	genes	10
614	CUEDC1	0	0	0	0	0	1	0	1	72091	genes	1
615	CUL1	1	0	1	87995	genes	0	0	0	0	0	1
616	CUL2	1	0	1	71332	genes	0	0	0	0	0	1
617	CUTC	0	0	0	0	0	1	0	1	33128	genes	1
618	CUX2	2	2	4	277746	genes	11	3	14	277746	genes	18
619	CWC27	0	0	0	0	0	1	0	1	260179	genes	1
620	CX3CR1	0	0	0	0	0	0	1	1	13938	genes	1
621	CXADR	0	1	1	43059	genes	0	0	0	0	0	1
622	CXCL8	0	0	0	0	0	0	1	1	3766	genes	1
623	CXCR4	0	0	0	0	0	0	1	1	3714	genes	1
624	CXCR5	0	0	0	0	0	0	1	1	10909	genes	1
625	CYB5R4	3	1	4	117053	genes	4	0	4	117053	genes	8
626	CYBA	0	1	1	6937	genes	0	0	0	0	0	1
627	CYP24A1	0	0	0	0	0	1	0	1	18268	genes	1
628	CYP3A5	1	0	1	38603	genes	2	1	3	38603	genes	4
629	CYP4B1	0	0	0	0	0	1	0	1	20224	genes	1
630	CYRIA	1	0	1	99552	genes	2	1	3	99552	genes	4
631	CYRIB	1	0	1	147760	genes	2	2	4	147760	genes	5
632	CYSLTR1	0	0	0	0	0	1	0	1	57648	genes	1
633	CYSTM1	1	0	1	70683	genes	0	0	0	0	0	1
634	D2HGDH	1	0	1	25256	genes	0	0	0	0	0	1
635	DAB2IP	0	0	0	0	0	0	1	1	136223	genes	1
636	DAD1	0	0	0	0	0	1	0	1	21767	genes	1
637	DAG1	0	1	1	13169	genes	0	0	0	0	0	1
638	DAGLB	1	0	1	23746	genes	1	0	1	23746	genes	2
639	DAP	0	0	0	0	0	0	1	1	66824	genes	1
640	DARS1	1	0	1	64813	genes	0	1	1	64813	genes	2
641	DAZL	0	0	0	0	0	0	1	1	22997	genes	1
642	DBH	0	0	0	0	0	0	1	1	17796	genes	1
643	DCAF6	1	0	1	179671	genes	1	1	2	179671	genes	3
644	DCAF8	0	0	0	0	0	0	1	1	42369	genes	1
645	DCK	0	0	0	0	0	0	1	1	26109	genes	1
646	DCPS	1	0	1	42800	genes	0	0	0	0	0	1
647	DCST1	0	1	1	15427	genes	0	1	1	15427	genes	2
648	DCTN5	0	0	0	0	0	1	0	1	28956	genes	1
649	DCX	0	1	1	115001	genes	1	0	1	115001	genes	2
650	DDO	0	1	1	17595	genes	1	1	2	17595	genes	3
651	DDOST	1	0	1	13857	genes	0	0	0	0	0	1
652	DDR1	1	0	1	14115	genes	0	0	0	0	0	1
653	DDR2	1	0	1	175850	genes	2	0	2	175850	genes	3
654	DDX1	0	0	0	0	0	1	0	1	31950	genes	1
655	DDX10	0	4	4	306774	genes	0	33	33	306774	genes	37
656	DDX24	2	0	2	18447	genes	2	0	2	18447	genes	4
657	DDX31	1	0	1	73653	genes	1	0	1	73653	genes	2
658	DDX47	0	0	0	0	0	2	0	2	13049	genes	2
659	DDX55	3	0	3	17302	genes	6	0	6	17302	genes	9
660	DDX59	0	0	0	0	0	1	0	1	16212	genes	1
661	DECR2	1	0	1	7912	genes	0	0	0	0	0	1
662	DEFB1	0	1	1	1921	genes	0	0	0	0	0	1
663	DEFB3	0	1	1	47384	genes	0	0	0	0	0	1
664	DEFB6	0	4	4	319671	genes	0	3	3	319671	genes	7
665	DENND1A	0	0	0	0	0	1	0	1	529638	genes	1
666	DENND5B	0	2	2	215801	genes	0	2	2	215801	genes	4
667	DEPTOR	1	0	1	115577	genes	0	1	1	115577	genes	2
668	DESI2	0	0	0	0	0	1	2	3	41106	genes	3
669	DET1	2	0	2	24891	genes	1	0	1	24891	genes	3
670	DEUP1	0	1	1	147177	genes	0	1	1	147177	genes	2
671	DEXI	0	0	0	0	0	4	0	4	14584	genes	4
672	DGKB	1	0	1	794872	genes	0	0	0	0	0	1
673	DGKD	0	0	0	0	0	0	1	1	110309	genes	1
674	DGKZ	0	0	0	0	0	0	1	1	30802	genes	1
675	DHCR24	0	0	0	0	0	0	2	2	32648	genes	2
676	DHCR7	0	1	1	19605	genes	0	6	6	19605	genes	7
677	DHFR	0	0	0	0	0	1	0	1	15588	genes	1
678	DHRS3	0	4	4	50023	genes	0	1	1	50023	genes	5
679	DHRS7B	0	1	1	47136	genes	0	1	1	47136	genes	2
680	DHRS9	0	1	1	23866	genes	0	0	0	0	0	1
681	DHX29	0	0	0	0	0	2	1	3	47313	genes	3
682	DHX32	0	0	0	0	0	0	1	1	53532	genes	1
683	DHX37	0	0	0	0	0	2	4	6	30727	genes	6
684	DHX38	0	0	0	0	0	2	0	2	17689	genes	2
685	DHX40	0	0	0	0	0	0	2	2	51696	genes	2
686	DHX8	1	0	1	28463	genes	1	0	1	28463	genes	2
687	DIABLO	0	0	0	0	0	1	0	1	17657	genes	1
688	DIAPH3	2	1	3	563614	genes	9	2	11	563614	genes	14
689	DIP2C	0	0	0	0	0	1	0	1	290583	genes	1
690	DIPK2A	0	0	0	0	0	1	0	1	22660	genes	1
691	DIS3L2	0	0	0	0	0	0	1	1	307080	genes	1
692	DISP1	1	1	2	210248	genes	0	2	2	210248	genes	4
693	DLEC1	0	0	0	0	0	2	0	2	90476	genes	2
694	DLGAP1	0	0	0	0	0	0	4	4	298358	genes	4
695	DNAAF1	2	0	2	20724	genes	4	0	4	20724	genes	6
696	DNAAF11	1	0	1	71003	genes	5	2	7	71003	genes	8
697	DNAH7	1	0	1	255101	genes	3	1	4	255101	genes	5
698	DNAJB13	0	0	0	0	0	0	1	1	12547	genes	1
699	DNAJC13	0	0	0	0	0	3	1	4	163698	genes	4
700	DNAJC3	0	0	0	0	0	0	1	1	65136	genes	1
701	DNAJC7	0	0	0	0	0	1	0	1	30230	genes	1
702	DNAL4	0	0	0	0	0	1	0	1	11731	genes	1
703	DNM1	1	0	1	43445	genes	1	0	1	43445	genes	2
704	DNM3	2	0	2	650289	genes	7	0	7	650289	genes	9
705	DNMBP	0	3	3	82948	genes	2	4	6	82948	genes	9
706	DNMT3A	1	0	1	103334	genes	2	0	2	103334	genes	3
707	DOCK10	0	1	1	238343	genes	3	0	3	238343	genes	4
708	DOCK11	0	0	0	0	0	0	1	1	326697	genes	1
709	DOK2	0	0	0	0	0	1	0	1	4621	genes	1
710	DONSON	0	0	0	0	0	2	0	2	10041	genes	2
711	DPF2	1	0	1	12663	genes	1	0	1	12663	genes	2
712	DPH3	0	0	0	0	0	1	0	1	6177	genes	1
713	DPP6	0	2	2	783114	genes	2	0	2	783114	genes	4
714	DPT	0	0	0	0	0	0	1	1	36402	genes	1
715	DPYD	0	0	0	0	0	13	2	15	922445	genes	15
716	DPYSL2	0	0	0	0	0	1	2	3	78720	genes	3
717	DPYSL3	0	0	0	0	0	1	0	1	114845	genes	1
718	DPYSL5	2	0	2	89366	genes	0	0	0	0	0	2
719	DRAM1	0	2	2	35739	genes	0	1	1	35739	genes	3
720	DRC1	0	0	0	0	0	1	0	1	38484	genes	1
721	DRC3	0	0	0	0	0	0	1	1	20021	genes	1
722	DRC7	1	0	1	20967	genes	1	0	1	20967	genes	2
723	DRG1	0	1	1	14896	genes	0	3	3	14896	genes	4
724	DSC2	0	0	0	0	0	1	0	1	35866	genes	1
725	DSCC1	0	0	0	0	0	0	1	1	12617	genes	1
726	DSE	0	0	0	0	0	0	1	1	47725	genes	1
727	DSG1	0	0	0	0	0	1	1	2	43924	genes	2
728	DSG2	0	2	2	51001	genes	0	6	6	51001	genes	8
729	DTNA	3	3	6	319314	genes	9	4	13	319314	genes	19
730	DTNB	0	0	0	0	0	0	1	1	210935	genes	1
731	DTNBP1	0	0	0	0	0	3	0	3	101463	genes	3
732	DTWD2	0	0	0	0	0	0	1	1	73150	genes	1
733	DTX1	1	0	1	37546	genes	0	0	0	0	0	1
734	DTX2	0	0	0	0	0	0	1	1	36351	genes	1
735	DUSP4	0	0	0	0	0	2	0	2	13793	genes	2
736	DUSP5	1	0	1	12774	genes	0	0	0	0	0	1
737	DYNC1I1	0	2	2	378673	genes	2	2	4	378673	genes	6
738	DYNC1I2	0	0	0	0	0	1	0	1	53866	genes	1
739	DYNC2I2	0	0	0	0	0	0	1	1	19372	genes	1
740	DYNLRB1	0	0	0	0	0	0	2	2	17486	genes	2
741	DYNLRB2	0	1	1	10115	genes	0	0	0	0	0	1
742	DYNLT1	0	0	0	0	0	0	1	1	7412	genes	1
743	DYRK1A	0	0	0	0	0	2	0	2	94176	genes	2
744	DZIP1	0	0	0	0	0	1	0	1	51401	genes	1
745	E2F4	0	0	0	0	0	1	0	1	6642	genes	1
746	EAPP	0	0	0	0	0	0	5	5	17037	genes	5
747	EBD	0	1	1	15247	genes	0	0	0	0	0	1
748	EBF2	0	0	0	0	0	2	1	3	219735	genes	3
749	ECHDC1	0	0	0	0	0	0	2	2	42814	genes	2
750	ECHS1	0	0	0	0	0	1	0	1	9132	genes	1
751	ECI2	0	0	0	0	0	1	0	1	17912	genes	1
752	ECT2	0	0	0	0	0	0	2	2	60259	genes	2
753	ECT2L	0	0	0	0	0	0	2	2	61926	genes	2
754	EDA	0	0	0	0	0	2	0	2	393563	genes	2
755	EDC3	0	0	0	0	0	0	6	6	50445	genes	6
756	EDEM1	0	0	0	0	0	0	1	1	26480	genes	1
757	EEF1D	0	0	0	0	0	1	0	1	12776	genes	1
758	EEF2K	0	0	0	0	0	1	0	1	50895	genes	1
759	EEF2KMT	0	0	0	0	0	1	7	8	10882	genes	8
760	EEFSEC	0	0	0	0	0	0	2	2	109368	genes	2
761	EFCAB2	0	1	1	110895	genes	0	2	2	110895	genes	3
762	EFHB	0	0	0	0	0	1	0	1	65447	genes	1
763	EFHD2	1	0	1	18115	genes	0	0	0	0	0	1
764	EFNA5	1	0	1	288006	genes	2	1	3	288006	genes	4
765	EFNB3	1	0	1	6070	genes	0	0	0	0	0	1
766	EFR3A	0	0	0	0	0	3	0	3	39418	genes	3
767	EFTUD2	0	0	0	0	0	0	1	1	36317	genes	1
768	EHMT1	0	1	1	109160	genes	1	7	8	109160	genes	9
769	EIF2AK1	1	0	1	26907	genes	2	0	2	26907	genes	3
770	EIF2AK3	0	0	0	0	0	1	0	1	81789	genes	1
771	EIF2B1	1	0	1	10913	genes	1	0	1	10913	genes	2
772	EIF2B3	0	1	1	113836	genes	2	2	4	113836	genes	5
773	EIF3A	0	0	0	0	0	1	0	1	31097	genes	1
774	EIF3B	0	1	1	18209	genes	0	2	2	18209	genes	3
775	EIF3CL	0	0	0	0	0	1	0	1	20175	genes	1
776	EIF3H	0	1	1	97278	genes	0	0	0	0	0	1
777	EIF3K	1	0	1	12895	genes	0	0	0	0	0	1
778	EIF3L	1	0	1	20759	genes	0	0	0	0	0	1
779	EIF4A2	0	0	0	0	0	1	0	1	6312	genes	1
780	EIPR1	0	0	0	0	0	1	1	2	67150	genes	2
781	ELAPOR2	0	0	0	0	0	6	1	7	221161	genes	7
782	ELAVL4	0	0	0	0	0	1	0	1	89640	genes	1
783	ELF5	0	0	0	0	0	1	0	1	29617	genes	1
784	ELMOD1	1	0	1	85492	genes	3	0	3	85492	genes	4
785	ELOVL2	0	1	1	46569	genes	0	2	2	46569	genes	3
786	ELOVL4	2	0	2	38804	genes	0	1	1	38804	genes	3
787	ELOVL7	0	0	0	0	0	0	1	1	76809	genes	1
788	ELP2	2	0	2	47704	genes	0	2	2	47704	genes	4
789	ELP3	0	0	0	0	0	0	2	2	118800	genes	2
790	ELP4	1	0	1	257443	genes	2	0	2	257443	genes	3
791	ELP6	2	0	2	16596	genes	0	0	0	0	0	2
792	EMC3	0	0	0	0	0	1	0	1	14564	genes	1
793	EMCN	0	0	0	0	0	0	2	2	121635	genes	2
794	EME1	0	0	0	0	0	0	1	1	6370	genes	1
795	EMID1	0	1	1	40230	genes	0	0	0	0	0	1
796	EML5	1	0	1	158082	genes	2	0	2	158082	genes	3
797	EML6	0	0	0	0	0	0	2	2	283038	genes	2
798	ENC1	1	0	1	12313	genes	0	0	0	0	0	1
799	ENO4	0	0	0	0	0	1	0	1	27503	genes	1
800	ENPP4	0	0	0	0	0	1	0	1	14913	genes	1
801	ENTHD1	0	1	1	92207	genes	0	0	0	0	0	1
802	ENTPD2	0	0	0	0	0	1	0	1	5499	genes	1
803	EP400	4	0	4	88155	genes	2	0	2	88155	genes	6
804	EPB41L3	0	0	0	0	0	1	2	3	93126	genes	3
805	EPB42	0	0	0	0	0	0	2	2	19135	genes	2
806	EPC2	0	0	0	0	0	2	0	2	127262	genes	2
807	EPHA1	0	0	0	0	0	0	1	1	15450	genes	1
808	EPHA3	0	0	0	0	0	0	1	1	408597	genes	1
809	EPHA7	0	2	2	207389	genes	0	2	2	207389	genes	4
810	EPHB1	1	0	1	466102	genes	0	0	0	0	0	1
811	EPHB2	3	0	3	140286	genes	1	0	1	140286	genes	4
812	EPHX2	0	0	0	0	0	1	0	1	71143	genes	1
813	EPN3	0	0	0	0	0	0	1	1	9482	genes	1
814	EPS15	1	1	2	139351	genes	2	0	2	139351	genes	4
815	ERC1	0	1	1	241663	genes	12	10	22	241663	genes	23
816	ERCC6	0	0	0	0	0	2	1	3	70616	genes	3
817	ERCC6L2	0	0	0	0	0	1	0	1	154378	genes	1
818	ERG	0	3	3	134764	genes	0	1	1	134764	genes	4
819	ERGIC1	1	0	1	112923	genes	2	0	2	112923	genes	3
820	ERI3	0	0	0	0	0	0	2	2	130876	genes	2
821	ERLIN1	0	0	0	0	0	3	0	3	41771	genes	3
822	ERMARD	0	0	0	0	0	1	0	1	25681	genes	1
823	ERP29	0	0	0	0	0	0	1	1	7478	genes	1
824	ESF1	0	0	0	0	0	1	0	1	66289	genes	1
825	ESPL1	1	0	1	21770	genes	0	0	0	0	0	1
826	ESRP1	0	0	0	0	0	1	0	1	58313	genes	1
827	ETAA1	0	0	0	0	0	1	0	1	13462	genes	1
828	ETFDH	0	1	1	44361	genes	0	0	0	0	0	1
829	ETV6	0	0	0	0	0	7	10	17	285124	genes	17
830	EVA1C	4	0	4	101997	genes	11	0	11	101997	genes	15
831	EXO1	0	0	0	0	0	0	1	1	46774	genes	1
832	EXOC1	0	0	0	0	0	0	1	1	53266	genes	1
833	EXOC4	3	12	15	806011	genes	9	30	39	806011	genes	54
834	EXOSC10	0	0	0	0	0	4	0	4	22479	genes	4
835	EXOSC9	0	0	0	0	0	1	0	1	12755	genes	1
836	EXT1	0	2	2	313652	genes	8	1	9	313652	genes	11
837	EXT2	0	1	1	149142	genes	0	2	2	149142	genes	3
838	EXTL3	0	1	1	37384	genes	0	3	3	37384	genes	4
839	EYA3	0	0	0	0	0	1	2	3	70914	genes	3
840	EZH1	0	1	1	32286	genes	1	0	1	32286	genes	2
841	EZR	3	0	3	45027	genes	0	0	0	0	0	3
842	F13A1	1	0	1	143579	genes	1	4	5	143579	genes	6
843	F5	1	0	1	79508	genes	9	0	9	79508	genes	10
844	FADS6	0	0	0	0	0	1	0	1	15890	genes	1
845	FAF1	0	2	2	497627	genes	3	1	4	497627	genes	6
846	FAF2	0	0	0	0	0	0	1	1	68934	genes	1
847	FAIM	0	0	0	0	0	0	1	1	16382	genes	1
848	FAM104A	0	1	1	19066	genes	0	0	0	0	0	1
849	FAM107B	1	0	1	76426	genes	3	0	3	76426	genes	4
850	FAM111B	0	1	1	15497	genes	0	0	0	0	0	1
851	FAM120A	0	0	0	0	0	1	0	1	115768	genes	1
852	FAM135B	0	0	0	0	0	2	0	2	224373	genes	2
853	FAM168A	0	0	0	0	0	0	1	1	61315	genes	1
854	FAM222A	0	0	0	0	0	1	0	1	29953	genes	1
855	FAM32A	1	0	1	6304	genes	1	0	1	6304	genes	2
856	FAM76A	0	0	0	0	0	1	0	1	30948	genes	1
857	FAM78A	0	0	0	0	0	0	1	1	12049	genes	1
858	FAM83B	0	2	2	96295	genes	1	0	1	96295	genes	3
859	FAM83D	0	0	0	0	0	0	1	1	22975	genes	1
860	FAM83G	0	1	1	28443	genes	0	1	1	28443	genes	2
861	FANCL	0	0	0	0	0	4	0	4	88799	genes	4
862	FANK1	0	2	2	110650	genes	0	1	1	110650	genes	3
863	FAR1	0	0	0	0	0	1	0	1	76125	genes	1
864	FARP1	0	0	0	0	0	1	0	1	238841	genes	1
865	FARS2	2	0	2	305569	genes	11	2	13	305569	genes	15
866	FARSA	1	0	1	10101	genes	0	0	0	0	0	1
867	FAS	0	0	0	0	0	0	3	3	33840	genes	3
868	FAT1	0	0	0	0	0	0	1	1	125895	genes	1
869	FAT2	0	1	1	74394	genes	0	1	1	74394	genes	2
870	FAT3	0	1	1	638791	genes	1	1	2	638791	genes	3
871	FBH1	0	0	0	0	0	5	0	5	39224	genes	5
872	FBN1	0	0	0	0	0	0	1	1	263082	genes	1
873	FBN2	1	0	1	221986	genes	0	0	0	0	0	1
874	FBXL20	1	0	1	100283	genes	0	1	1	100283	genes	2
875	FBXL4	1	0	1	75569	genes	0	0	0	0	0	1
876	FBXO11	0	0	0	0	0	1	1	2	112005	genes	2
877	FBXO17	0	0	0	0	0	0	3	3	31866	genes	3
878	FBXO25	0	0	0	0	0	0	1	1	28051	genes	1
879	FBXO39	2	2	4	8283	genes	1	0	1	8283	genes	5
880	FBXO45	0	0	0	0	0	3	0	3	10875	genes	3
881	FBXO8	0	0	0	0	0	0	1	1	39453	genes	1
882	FBXO9	0	0	0	0	0	2	0	2	21489	genes	2
883	FBXW7	0	0	0	0	0	1	2	3	33333	genes	3
884	FBXW8	0	0	0	0	0	0	1	1	114278	genes	1
885	FCGR2A	0	1	1	6672	genes	0	1	1	6672	genes	2
886	FCN1	0	1	1	8618	genes	0	0	0	0	0	1
887	FCSK	0	0	0	0	0	0	1	1	13109	genes	1
888	FDFT1	0	0	0	0	0	0	1	1	26454	genes	1
889	FDPS	0	0	0	0	0	1	0	1	7996	genes	1
890	FFAR3	0	0	0	0	0	0	1	1	4853	genes	1
891	FFAR4	0	1	1	21232	genes	0	0	0	0	0	1
892	FGF1	0	1	1	107034	genes	0	2	2	107034	genes	3
893	FGF12	0	0	0	0	0	3	3	6	608221	genes	6
894	FGF14	2	0	2	634695	genes	0	0	0	0	0	2
895	FGF7	1	0	1	60255	genes	0	0	0	0	0	1
896	FGFR1	0	0	0	0	0	1	0	1	41282	genes	1
897	FGFR4	0	0	0	0	0	1	0	1	10747	genes	1
898	FGG	0	0	0	0	0	0	1	1	7459	genes	1
899	FHIT	1	1	2	1524017	genes	8	7	15	1524017	genes	17
900	FHOD3	1	1	2	521883	genes	1	2	3	521883	genes	5
901	FIG4	0	0	0	0	0	0	1	1	172245	genes	1
902	FKBP4	0	0	0	0	0	0	1	1	7859	genes	1
903	FLACC1	0	0	0	0	0	5	0	5	20782	genes	5
904	FLCN	1	0	1	16044	genes	0	0	0	0	0	1
905	FLI1	0	1	1	131086	genes	0	0	0	0	0	1
906	FLNC	0	0	0	0	0	1	0	1	27748	genes	1
907	FLT1	0	0	0	0	0	0	1	1	204897	genes	1
908	FMNL2	2	0	2	332350	genes	2	3	5	332350	genes	7
909	FMO3	0	1	1	26067	genes	0	0	0	0	0	1
910	FMR1	0	0	0	0	0	2	0	2	39335	genes	2
911	FN3K	0	0	0	0	0	0	1	1	8886	genes	1
912	FNBP1	1	0	1	135429	genes	5	0	5	135429	genes	6
913	FNDC3A	0	0	0	0	0	0	2	2	91969	genes	2
914	FNDC3B	0	0	0	0	0	0	1	1	285263	genes	1
915	FNTB	0	0	0	0	0	1	0	1	80470	genes	1
916	FOXO3	0	0	0	0	0	0	1	1	97539	genes	1
917	FRA10AC1	0	0	0	0	0	1	0	1	73906	genes	1
918	FRMD5	0	0	0	0	0	2	2	4	321495	genes	4
919	FRMD6	1	0	1	267003	genes	5	3	8	267003	genes	9
920	FRMD8	0	0	0	0	0	1	2	3	21281	genes	3
921	FRY	0	0	0	0	0	4	0	4	249554	genes	4
922	FSD2	1	0	1	22741	genes	1	0	1	22741	genes	2
923	FSTL5	0	1	1	870569	genes	3	2	5	870569	genes	6
924	FTO	0	2	2	423969	genes	3	8	11	423969	genes	13
925	FUBP3	3	0	3	49586	genes	5	0	5	49586	genes	8
926	FUS	0	1	1	10023	genes	0	0	0	0	0	1
927	FUT10	0	0	0	0	0	0	1	1	68648	genes	1
928	FUT8	0	0	0	0	0	1	0	1	175346	genes	1
929	FYN	7	0	7	152091	genes	10	0	10	152091	genes	17
930	FZD3	0	1	1	87714	genes	2	2	4	87714	genes	5
931	G6PC2	0	0	0	0	0	1	0	1	6708	genes	1
932	GABPA	0	0	0	0	0	0	1	1	35063	genes	1
933	GABRA2	0	1	1	140253	genes	1	5	6	140253	genes	7
934	GABRA3	0	0	0	0	0	0	4	4	240433	genes	4
935	GABRB2	0	0	0	0	0	2	0	2	287438	genes	2
936	GABRB3	0	1	1	279435	genes	1	0	1	279435	genes	2
937	GABRG1	0	2	2	90105	genes	0	4	4	90105	genes	6
938	GABRP	0	0	0	0	0	2	0	2	26648	genes	2
939	GADL1	1	1	2	194174	genes	4	7	11	194174	genes	13
940	GALNT1	2	0	2	69423	genes	2	0	2	69423	genes	4
941	GALNT13	1	0	1	656510	genes	0	0	0	0	0	1
942	GALNT14	0	1	1	215288	genes	0	0	0	0	0	1
943	GALNT15	1	0	1	46802	genes	4	1	5	46802	genes	6
944	GALNT17	2	0	2	430081	genes	6	4	10	430081	genes	12
945	GALNT18	4	3	7	355587	genes	12	8	20	355587	genes	27
946	GALNT2	0	1	1	186176	genes	2	0	2	186176	genes	3
947	GALNT9	2	0	2	85582	genes	6	0	6	85582	genes	8
948	GALNTL5	0	1	1	56126	genes	5	1	6	56126	genes	7
949	GALNTL6	2	1	3	1542469	genes	2	0	2	1542469	genes	5
950	GAN	1	8	9	44689	genes	0	19	19	44689	genes	28
951	GAPVD1	0	0	0	0	0	0	1	1	71396	genes	1
952	GART	0	0	0	0	0	5	0	5	26288	genes	5
953	GAS2	0	0	0	0	0	3	0	3	147334	genes	3
954	GAS7	0	0	0	0	0	1	0	1	205283	genes	1
955	GATA4	0	0	0	0	0	0	1	1	48406	genes	1
956	GATAD2A	3	0	3	95853	genes	8	0	8	95853	genes	11
957	GATD1	1	0	1	5203	genes	0	0	0	0	0	1
958	GATD3A	0	0	0	0	0	1	0	1	8763	genes	1
959	GBA	1	0	1	18828	genes	0	0	0	0	0	1
960	GBA3	1	0	1	131843	genes	1	0	1	131843	genes	2
961	GBE1	1	3	4	310897	genes	2	3	5	310897	genes	9
962	GCDH	0	0	0	0	0	1	0	1	6795	genes	1
963	GCK	0	0	0	0	0	3	3	6	36216	genes	6
964	GDAP2	0	0	0	0	0	5	0	5	64704	genes	5
965	GDI2	0	1	1	28650	genes	0	0	0	0	0	1
966	GDPD3	0	1	1	5356	genes	0	0	0	0	0	1
967	GDPD5	0	0	0	0	0	1	0	1	90819	genes	1
968	GEM	1	0	1	14026	genes	0	0	0	0	0	1
969	GEN1	0	0	0	0	0	1	0	1	28620	genes	1
970	GET1	1	0	1	14945	genes	2	0	2	14945	genes	3
971	GET4	1	0	1	13009	genes	1	0	1	13009	genes	2
972	GFAP	0	0	0	0	0	1	0	1	9287	genes	1
973	GFM1	0	0	0	0	0	3	0	3	50665	genes	3
974	GFRA1	3	1	4	231476	genes	7	1	8	231476	genes	12
975	GFRA2	0	0	0	0	0	2	3	5	106154	genes	5
976	GGNBP2	0	0	0	0	0	0	1	1	32555	genes	1
977	GGT1	0	1	1	15985	genes	0	0	0	0	0	1
978	GHRH	0	0	0	0	0	1	0	1	9306	genes	1
979	GID4	1	0	1	14272	genes	1	0	1	14272	genes	2
980	GIGYF2	0	0	0	0	0	0	1	1	129320	genes	1
981	GIMAP4	0	2	2	7505	genes	0	0	0	0	0	2
982	GIT2	2	0	2	40518	genes	0	0	0	0	0	2
983	GJC1	0	0	0	0	0	1	0	1	28210	genes	1
984	GLB1	0	0	0	0	0	2	1	3	103967	genes	3
985	GLG1	0	1	1	127705	genes	0	0	0	0	0	1
986	GLI2	0	0	0	0	0	1	0	1	190536	genes	1
987	GLIPR1	1	0	1	46406	genes	4	0	4	46406	genes	5
988	GLRB	0	0	0	0	0	1	0	1	89312	genes	1
989	GLRX	0	0	0	0	0	1	0	1	10650	genes	1
990	GLRX5	0	0	0	0	0	1	0	1	9923	genes	1
991	GLS	0	1	1	54141	genes	0	6	6	54141	genes	7
992	GLT1D1	0	0	0	0	0	0	1	1	115390	genes	1
993	GLTP	0	1	1	21394	genes	0	0	0	0	0	1
994	GLUD1	0	0	0	0	0	0	1	1	40004	genes	1
995	GLUL	0	0	0	0	0	1	0	1	10572	genes	1
996	GLYATL2	1	0	1	6763	genes	0	0	0	0	0	1
997	GLYR1	0	1	1	31772	genes	0	3	3	31772	genes	4
998	GMDS	2	1	3	434979	genes	4	1	5	434979	genes	8
999	GMFG	0	1	1	4911	genes	0	0	0	0	0	1
1000	GMPR	0	1	1	60820	genes	0	0	0	0	0	1
1001	GMPS	3	3	6	71880	genes	7	4	11	71880	genes	17
1002	GNA12	2	1	3	71988	genes	1	2	3	71988	genes	6
1003	GNA14	0	0	0	0	0	2	0	2	198257	genes	2
1004	GNA15	0	0	0	0	0	1	0	1	19854	genes	1
1005	GNAL	0	0	0	0	0	1	0	1	52102	genes	1
1006	GNAO1	0	0	0	0	0	0	2	2	179984	genes	2
1007	GNAQ	0	1	1	310505	genes	0	4	4	310505	genes	5
1008	GNG12	0	0	0	0	0	1	0	1	80709	genes	1
1009	GNG2	0	0	0	0	0	5	4	9	134193	genes	9
1010	GNG4	0	1	1	68600	genes	0	2	2	68600	genes	3
1011	GNG7	0	1	1	138239	genes	1	6	7	138239	genes	8
1012	GNPTAB	0	1	1	82962	genes	0	0	0	0	0	1
1013	GNRHR	0	0	0	0	0	1	0	1	17443	genes	1
1014	GOLGA4	0	0	0	0	0	0	1	1	109981	genes	1
1015	GOLM2	0	0	0	0	0	0	1	1	88431	genes	1
1016	GON4L	0	2	2	83784	genes	1	2	3	83784	genes	5
1017	GORAB	0	2	2	22619	genes	1	2	3	22619	genes	5
1018	GOSR1	0	1	1	35424	genes	0	0	0	0	0	1
1019	GOSR2	1	1	2	20571	genes	4	0	4	20571	genes	6
1020	GPALPP1	1	0	1	17502	genes	1	0	1	17502	genes	2
1021	GPAT3	1	0	1	70710	genes	0	0	0	0	0	1
1022	GPATCH2	0	0	0	0	0	0	1	1	25334	genes	1
1023	GPATCH4	1	0	1	8010	genes	0	0	0	0	0	1
1024	GPC2	0	0	0	0	0	0	1	1	5733	genes	1
1025	GPC5	3	0	3	1033954	genes	7	3	10	1033954	genes	13
1026	GPC6	1	1	2	508452	genes	8	11	19	508452	genes	21
1027	GPLD1	1	0	1	50990	genes	6	0	6	50990	genes	7
1028	GPM6A	0	0	0	0	0	3	1	4	142582	genes	4
1029	GPR107	0	0	0	0	0	1	0	1	52227	genes	1
1030	GPR137B	0	0	0	0	0	0	1	1	55709	genes	1
1031	GPR161	0	0	0	0	0	1	0	1	103423	genes	1
1032	GPR179	0	0	0	0	0	1	0	1	15294	genes	1
1033	GPR87	0	1	1	16503	genes	0	1	1	16503	genes	2
1034	GPR89A	0	0	0	0	0	2	0	2	45764	genes	2
1035	GPRC5B	1	0	1	19960	genes	2	0	2	19960	genes	3
1036	GPRC5D	0	0	0	0	0	1	1	2	7165	genes	2
1037	GPT2	2	0	2	32661	genes	2	0	2	32661	genes	4
1038	GRAMD1B	0	0	0	0	0	0	1	1	181482	genes	1
1039	GRAMD1C	0	0	0	0	0	1	0	1	99360	genes	1
1040	GRAMD2B	0	1	1	75656	genes	1	0	1	75656	genes	2
1041	GRAP	0	0	0	0	0	0	1	1	20994	genes	1
1042	GRB10	0	1	1	139454	genes	0	3	3	139454	genes	4
1043	GRHL1	1	0	1	50218	genes	1	0	1	50218	genes	2
1044	GRIA1	1	0	1	346285	genes	1	0	1	346285	genes	2
1045	GRIA4	0	0	0	0	0	1	2	3	608302	genes	3
1046	GRIK1	0	0	0	0	0	5	2	7	465661	genes	7
1047	GRIK4	4	2	6	332654	genes	3	1	4	332654	genes	10
1048	GRIN2B	0	0	0	0	0	13	6	19	343797	genes	19
1049	GRK3	1	0	1	115594	genes	4	1	5	115594	genes	6
1050	GRK5	0	0	0	0	0	6	3	9	228060	genes	9
1051	GRK7	2	0	2	40281	genes	0	0	0	0	0	2
1052	GRM8	0	0	0	0	0	2	0	2	839023	genes	2
1053	GRO1	0	0	0	0	0	1	0	1	2139	genes	1
1054	GRPR	2	0	2	37064	genes	0	0	0	0	0	2
1055	GSAP	0	1	1	98452	genes	0	0	0	0	0	1
1056	GSDMC	0	0	0	0	0	1	0	1	15403	genes	1
1057	GSDME	0	0	0	0	0	1	0	1	74106	genes	1
1058	GSG1	0	0	0	0	0	1	0	1	19472	genes	1
1059	GSG1L	5	7	12	252503	genes	0	15	15	252503	genes	27
1060	GSPT1	1	0	1	29889	genes	1	0	1	29889	genes	2
1061	GSTA1	1	0	1	14863	genes	0	0	0	0	0	1
1062	GSTA2	0	0	0	0	0	1	0	1	13726	genes	1
1063	GSTT4	0	1	1	4618	genes	0	0	0	0	0	1
1064	GTDC1	0	0	0	0	0	2	0	2	425181	genes	2
1065	GTF2A1L	0	1	1	48670	genes	0	1	1	48670	genes	2
1066	GTF2F2	2	0	2	136141	genes	8	0	8	136141	genes	10
1067	GTF2H3	0	1	1	20270	genes	1	2	3	20270	genes	4
1068	GTF2H5	0	1	1	14051	genes	0	0	0	0	0	1
1069	GTF2I	0	0	0	0	0	0	1	1	81228	genes	1
1070	GTF2IRD1	1	1	2	79221	genes	1	3	4	79221	genes	6
1071	GTF3C4	1	0	1	17740	genes	0	1	1	17740	genes	2
1072	GTPBP1	0	0	0	0	0	1	0	1	21925	genes	1
1073	GUCY1A1	0	1	1	65053	genes	0	0	0	0	0	1
1074	GUCY2C	0	0	0	0	0	2	1	3	65385	genes	3
1075	GUCY2F	0	0	0	0	0	1	0	1	149998	genes	1
1076	GUK1	0	0	0	0	0	0	1	1	10312	genes	1
1077	GULO	0	0	0	0	0	1	1	2	24523	genes	2
1078	GUSB	0	0	0	0	0	0	1	1	12388	genes	1
1079	GYG1	1	0	1	40806	genes	2	0	2	40806	genes	3
1080	HABP2	0	0	0	0	0	2	0	2	35460	genes	2
1081	HACE1	0	0	0	0	0	0	1	1	118318	genes	1
1082	HADH	1	0	1	43434	genes	0	0	0	0	0	1
1083	HAL	0	0	0	0	0	1	0	1	23327	genes	1
1084	HCRTR1	0	0	0	0	0	1	0	1	7735	genes	1
1085	HCRTR2	0	0	0	0	0	0	2	2	131689	genes	2
1086	HDAC2	1	0	1	35193	genes	0	0	0	0	0	1
1087	HDGFL3	0	0	0	0	0	1	0	1	76268	genes	1
1088	HEBP1	0	0	0	0	0	0	2	2	37389	genes	2
1089	HEPHL1	1	1	2	91601	genes	1	4	5	91601	genes	7
1090	HERC1	0	0	0	0	0	3	0	3	69208	genes	3
1091	HERC2	0	0	0	0	0	1	1	2	231992	genes	2
1092	HERC3	1	0	1	146331	genes	0	0	0	0	0	1
1093	HERC6	0	0	0	0	0	1	0	1	57061	genes	1
1094	HERPUD1	1	0	1	11020	genes	0	0	0	0	0	1
1095	HIF1A	0	0	0	0	0	0	1	1	44855	genes	1
1096	HIF1AN	0	0	0	0	0	0	1	1	9084	genes	1
1097	HIP1	0	0	0	0	0	0	2	2	133842	genes	2
1098	HK1	0	0	0	0	0	0	5	5	70584	genes	5
1099	HMBOX1	0	0	0	0	0	0	1	1	189653	genes	1
1100	HMCES	1	0	1	14736	genes	1	0	1	14736	genes	2
1101	HMGA1	0	1	1	8871	genes	0	0	0	0	0	1
1102	HMGCS2	1	0	1	23968	genes	0	0	0	0	0	1
1103	HMGN3	0	0	0	0	0	4	2	6	35432	genes	6
1104	HNF1A	0	0	0	0	0	0	6	6	16737	genes	6
1105	HNF4G	0	0	0	0	0	1	0	1	134932	genes	1
1106	HNRNPC	1	0	1	44758	genes	0	0	0	0	0	1
1107	HOGA1	0	1	1	21531	genes	0	0	0	0	0	1
1108	HOMER1	1	0	1	133049	genes	0	0	0	0	0	1
1109	HOOK3	0	1	1	79426	genes	3	2	5	79426	genes	6
1110	HORMAD1	0	0	0	0	0	1	0	1	19867	genes	1
1111	HPCAL1	1	0	1	117320	genes	1	1	2	117320	genes	3
1112	HPCAL4	1	0	1	11915	genes	0	0	0	0	0	1
1113	HPS3	0	0	0	0	0	2	2	4	40928	genes	4
1114	HS1BP3	0	2	2	36640	genes	0	1	1	36640	genes	3
1115	HS3ST2	0	0	0	0	0	0	1	1	117017	genes	1
1116	HS3ST3A1	1	0	1	83878	genes	0	0	0	0	0	1
1117	HS3ST5	1	0	1	292777	genes	6	7	13	292777	genes	14
1118	HS6ST2	1	0	1	334402	genes	0	0	0	0	0	1
1119	HS6ST3	0	0	0	0	0	5	0	5	712545	genes	5
1120	HSD11B1	3	0	3	44973	genes	3	0	3	44973	genes	6
1121	HSD17B12	0	0	0	0	0	0	1	1	177440	genes	1
1122	HSD17B3	0	0	0	0	0	1	0	1	53310	genes	1
1123	HSD17B4	0	0	0	0	0	0	1	1	99865	genes	1
1124	HSDL1	0	0	0	0	0	1	0	1	11760	genes	1
1125	HSDL2	2	0	2	60311	genes	3	0	3	60311	genes	5
1126	HSPBAP1	0	0	0	0	0	0	2	2	56057	genes	2
1127	HSTN	0	0	0	0	0	1	0	1	12629	genes	1
1128	HTR2A	1	1	2	65865	genes	0	5	5	65865	genes	7
1129	HTRA1	0	0	0	0	0	1	0	1	57531	genes	1
1130	IAH1	1	0	1	11248	genes	2	0	2	11248	genes	3
1131	IAPP	0	0	0	0	0	1	0	1	5549	genes	1
1132	IBTK	1	1	2	81690	genes	2	2	4	81690	genes	6
1133	ICA1	1	1	2	163337	genes	4	2	6	163337	genes	8
1134	ICOS	0	0	0	0	0	0	1	1	25256	genes	1
1135	IFIT3	0	0	0	0	0	1	0	1	7114	genes	1
1136	IFNAR1	1	0	1	28449	genes	2	2	4	28449	genes	5
1137	IFNGR1	1	0	1	24392	genes	2	0	2	24392	genes	3
1138	IFNLR1	0	0	0	0	0	0	1	1	21450	genes	1
1139	IFT122	0	0	0	0	0	0	1	1	68913	genes	1
1140	IFT43	0	1	1	103798	genes	0	0	0	0	0	1
1141	IFT52	0	0	0	0	0	0	1	1	37911	genes	1
1142	IFT81	0	0	0	0	0	0	1	1	98245	genes	1
1143	IGBP1	0	0	0	0	0	1	0	1	47012	genes	1
1144	IGF1R	0	0	0	0	0	2	0	2	300102	genes	2
1145	IGF2R	2	0	2	102527	genes	3	0	3	102527	genes	5
1146	IGSF3	0	0	0	0	0	0	1	1	125493	genes	1
1147	IKBKB	3	0	3	52554	genes	2	0	2	52554	genes	5
1148	IKZF1	0	0	0	0	0	1	0	1	70770	genes	1
1149	IKZF5	0	0	0	0	0	2	0	2	16199	genes	2
1150	IL1R2	0	0	0	0	0	1	1	2	38332	genes	2
1151	IL1RAP	0	0	0	0	0	2	0	2	120667	genes	2
1152	IL20RB	1	0	1	39880	genes	0	1	1	39880	genes	2
1153	IL21R	0	0	0	0	0	0	1	1	35666	genes	1
1154	IL23R	0	0	0	0	0	1	1	2	73702	genes	2
1155	IL2RA	1	0	1	45353	genes	3	0	3	45353	genes	4
1156	IL31RA	0	0	0	0	0	1	0	1	46362	genes	1
1157	IL34	0	1	1	59946	genes	0	0	0	0	0	1
1158	IL6R	0	0	0	0	0	2	0	2	52267	genes	2
1159	IMPA2	0	0	0	0	0	2	0	2	21461	genes	2
1160	IMPG1	2	0	2	162856	genes	4	3	7	162856	genes	9
1161	INKA2	1	0	1	13286	genes	0	0	0	0	0	1
1162	INO80D	0	0	0	0	0	2	0	2	40731	genes	2
1163	INPP5D	0	1	1	137757	genes	0	1	1	137757	genes	2
1164	INSC	1	2	3	139671	genes	0	0	0	0	0	3
1165	INTS1	1	0	1	23816	genes	0	0	0	0	0	1
1166	INTS4	0	0	0	0	0	1	0	1	108254	genes	1
1167	INTS7	0	1	1	83390	genes	1	1	2	83390	genes	3
1168	INTS9	0	1	1	126778	genes	0	1	1	126778	genes	2
1169	IPO11	0	1	1	180598	genes	0	1	1	180598	genes	2
1170	IPO13	1	0	1	19628	genes	0	1	1	19628	genes	2
1171	IQCG	0	0	0	0	0	0	1	1	45653	genes	1
1172	IQCK	0	0	0	0	0	1	1	2	161388	genes	2
1173	IQSEC1	0	0	0	0	0	1	0	1	52065	genes	1
1174	IRAG1	1	1	2	126218	genes	5	4	9	126218	genes	11
1175	IRF5	0	0	0	0	0	0	1	1	11696	genes	1
1176	IRF6	0	0	0	0	0	3	0	3	16247	genes	3
1177	ITCH	0	1	1	99111	genes	0	5	5	99111	genes	6
1178	ITFG1	8	0	8	299997	genes	26	0	26	299997	genes	34
1179	ITFG2	0	0	0	0	0	1	0	1	9426	genes	1
1180	ITGA2	0	0	0	0	0	2	0	2	105040	genes	2
1181	ITGA3	2	0	2	32647	genes	1	0	1	32647	genes	3
1182	ITGA5	0	1	1	21042	genes	0	0	0	0	0	1
1183	ITGA6	0	0	0	0	0	4	3	7	86199	genes	7
1184	ITGAM	0	0	0	0	0	1	0	1	35068	genes	1
1185	ITGB1BP1	0	1	1	14886	genes	3	0	3	14886	genes	4
1186	ITGB2	1	0	1	29152	genes	0	0	0	0	0	1
1187	ITGB4	0	0	0	0	0	2	0	2	32353	genes	2
1188	ITGB5	0	0	0	0	0	1	2	3	115228	genes	3
1189	ITGB8	0	0	0	0	0	0	1	1	91671	genes	1
1190	ITGBL1	0	0	0	0	0	2	0	2	235466	genes	2
1191	ITIH2	0	0	0	0	0	1	0	1	32256	genes	1
1192	ITIH5	0	0	0	0	0	0	2	2	80833	genes	2
1193	ITM2B	0	0	0	0	0	0	2	2	24996	genes	2
1194	ITPK1	0	1	1	162226	genes	1	3	4	162226	genes	5
1195	JADE1	1	0	1	45622	genes	0	0	0	0	0	1
1196	JAG1	0	1	1	44394	genes	0	1	1	44394	genes	2
1197	JAM2	1	0	1	82561	genes	2	0	2	82561	genes	3
1198	JAML	0	0	0	0	0	1	0	1	31172	genes	1
1199	JOSD1	1	0	1	10696	genes	0	0	0	0	0	1
1200	JPH1	0	0	0	0	0	1	0	1	92317	genes	1
1201	JPH3	1	0	1	75230	genes	0	0	0	0	0	1
1202	JUP	1	1	2	24117	genes	0	0	0	0	0	2
1203	KALRN	1	5	6	619935	genes	0	11	11	619935	genes	17
1204	KANTR	0	0	0	0	0	0	2	2	42156	genes	2
1205	KAT5	0	0	0	0	0	0	3	3	7527	genes	3
1206	KAT8	0	0	0	0	0	0	1	1	9697	genes	1
1207	KATNB1	1	0	1	17883	genes	0	0	0	0	0	1
1208	KCMF1	1	1	2	77454	genes	1	2	3	77454	genes	5
1209	KCNAB1	3	0	3	296215	genes	1	1	2	296215	genes	5
1210	KCND2	0	2	2	563761	genes	0	2	2	563761	genes	4
1211	KCND3	0	0	0	0	0	1	1	2	219236	genes	2
1212	KCNH1	1	0	1	436568	genes	7	3	10	436568	genes	11
1213	KCNH5	0	0	0	0	0	0	1	1	383851	genes	1
1214	KCNH6	0	0	0	0	0	0	2	2	22781	genes	2
1215	KCNIP1	1	2	3	260482	genes	2	3	5	260482	genes	8
1216	KCNIP4	2	0	2	129594	genes	2	1	3	129594	genes	5
1217	KCNK12	1	0	1	48877	genes	0	0	0	0	0	1
1218	KCNMA1	0	0	0	0	0	1	0	1	763964	genes	1
1219	KCNMB2	0	0	0	0	0	3	1	4	481050	genes	4
1220	KCNN2	0	0	0	0	0	0	1	1	166237	genes	1
1221	KCNQ1	0	0	0	0	0	1	1	2	379128	genes	2
1222	KCNU1	0	0	0	0	0	1	1	2	144549	genes	2
1223	KCTD1	0	0	0	0	0	2	0	2	101015	genes	2
1224	KCTD10	0	0	0	0	0	1	0	1	29328	genes	1
1225	KCTD5	0	0	0	0	0	0	1	1	20657	genes	1
1226	KCTD8	0	0	0	0	0	2	1	3	262947	genes	3
1227	KDM6A	0	1	1	179145	genes	1	0	1	179145	genes	2
1228	KDM8	0	0	0	0	0	0	1	1	22074	genes	1
1229	KDR	0	1	1	44857	genes	0	1	1	44857	genes	2
1230	KHDRBS3	0	0	0	0	0	2	0	2	143968	genes	2
1231	KIAA1797	1	3	4	276953	genes	0	0	0	0	0	4
1232	KIAA2012	0	0	0	0	0	3	2	5	126025	genes	5
1233	KIF17	0	0	0	0	0	0	3	3	50988	genes	3
1234	KIF5C	0	0	0	0	0	1	0	1	156132	genes	1
1235	KIFBP	0	0	0	0	0	0	1	1	54679	genes	1
1236	KIN	0	0	0	0	0	1	0	1	8757	genes	1
1237	KIRREL3	0	1	1	597747	genes	0	0	0	0	0	1
1238	KLB	0	0	0	0	0	0	1	1	34617	genes	1
1239	KLF11	0	0	0	0	0	1	0	1	10714	genes	1
1240	KLF12	0	1	1	352526	genes	0	0	0	0	0	1
1241	KLHL10	0	1	1	12606	genes	0	2	2	12606	genes	3
1242	KLHL13	0	0	0	0	0	1	0	1	62628	genes	1
1243	KLHL14	0	0	0	0	0	3	0	3	113075	genes	3
1244	KLHL2	0	0	0	0	0	0	2	2	158052	genes	2
1245	KLHL29	0	1	1	332208	genes	1	1	2	332208	genes	3
1246	KLHL36	0	0	0	0	0	1	0	1	11585	genes	1
1247	KLHL42	0	0	0	0	0	0	1	1	16413	genes	1
1248	KLHL7	0	0	0	0	0	1	1	2	55722	genes	2
1249	KLRC1	0	0	0	0	0	2	1	3	77215	genes	3
1250	KLRK1	0	0	0	0	0	1	0	1	10650	genes	1
1251	KMO	0	2	2	68321	genes	1	8	9	68321	genes	11
1252	KMT2E	1	0	1	91168	genes	1	0	1	91168	genes	2
1253	KMT5A	0	0	0	0	0	4	0	4	17671	genes	4
1254	KMT5B	0	0	0	0	0	0	1	1	42861	genes	1
1255	KNOP1	0	0	0	0	0	1	0	1	12802	genes	1
1256	KPNA7	0	1	1	27150	genes	0	6	6	27150	genes	7
1257	KRIT1	0	0	0	0	0	0	1	1	39304	genes	1
1258	KRR1	1	0	1	14498	genes	1	0	1	14498	genes	2
1259	KRT27	0	0	0	0	0	0	1	1	5635	genes	1
1260	KRT31	0	0	0	0	0	1	0	1	3792	genes	1
1261	KRT32	0	0	0	0	0	0	1	1	8211	genes	1
1262	KRT34	1	0	1	4431	genes	0	0	0	0	0	1
1263	KRT35	1	0	1	4297	genes	0	0	0	0	0	1
1264	KRT40	0	0	0	0	0	1	0	1	7115	genes	1
1265	KSR2	0	0	0	0	0	0	1	1	430295	genes	1
1266	KTN1	1	1	2	112718	genes	1	0	1	112718	genes	3
1267	KYNU	0	0	0	0	0	2	0	2	120144	genes	2
1268	LACTB	0	1	1	17889	genes	0	0	0	0	0	1
1269	LAMA4	2	0	2	154562	genes	9	1	10	154562	genes	12
1270	LAMB3	0	1	1	43344	genes	1	1	2	43344	genes	3
1271	LANCL1	0	1	1	49322	genes	0	0	0	0	0	1
1272	LANCL2	0	0	0	0	0	4	0	4	83855	genes	4
1273	LARP4B	1	0	1	55994	genes	6	2	8	55994	genes	9
1274	LARS2	2	0	2	146746	genes	9	1	10	146746	genes	12
1275	LASP1	1	0	1	40376	genes	1	0	1	40376	genes	2
1276	LAT	0	0	0	0	0	0	2	2	4876	genes	2
1277	LBP	0	1	1	32342	genes	0	3	3	32342	genes	4
1278	LCORL	1	0	1	150127	genes	0	0	0	0	0	1
1279	LCP1	0	0	0	0	0	1	0	1	64448	genes	1
1280	LCP2	0	0	0	0	0	1	2	3	47079	genes	3
1281	LDB2	1	1	2	454708	genes	5	2	7	454708	genes	9
1282	LDHA	0	0	0	0	0	1	0	1	11883	genes	1
1283	LDHB	0	0	0	0	0	0	2	2	18248	genes	2
1284	LEP	0	1	1	16732	genes	0	0	0	0	0	1
1285	LEPR	0	0	0	0	0	0	4	4	75313	genes	4
1286	LGALS4	0	0	0	0	0	0	1	1	6947	genes	1
1287	LGALSL	0	0	0	0	0	0	1	1	8017	genes	1
1288	LGR5	0	1	1	125235	genes	0	2	2	125235	genes	3
1289	LHFPL3	0	0	0	0	0	1	0	1	578861	genes	1
1290	LHFPL6	1	0	1	207552	genes	1	1	2	207552	genes	3
1291	LHPP	0	3	3	127305	genes	1	10	11	127305	genes	14
1292	LIMD1	0	0	0	0	0	1	0	1	73989	genes	1
1293	LIMK2	0	1	1	53448	genes	1	0	1	53448	genes	2
1294	LIMS2	0	0	0	0	0	2	0	2	38445	genes	2
1295	LIPA	0	0	0	0	0	1	0	1	42407	genes	1
1296	LIPC	0	0	0	0	0	1	1	2	162114	genes	2
1297	LIPF	0	0	0	0	0	1	1	2	14034	genes	2
1298	LIPM	2	0	2	20173	genes	5	0	5	20173	genes	7
1299	LITAF	0	0	0	0	0	1	0	1	36130	genes	1
1300	LIX1	1	0	1	55611	genes	0	0	0	0	0	1
1301	LLGL1	0	0	0	0	0	2	0	2	14832	genes	2
1302	LMAN2	1	0	1	20628	genes	0	1	1	20628	genes	2
1303	LMBR1	0	0	0	0	0	0	1	1	132349	genes	1
1304	LMBRD1	0	0	0	0	0	0	1	1	132297	genes	1
1305	LMCD1	0	1	1	57017	genes	0	1	1	57017	genes	2
1306	LMO1	0	0	0	0	0	1	0	1	37461	genes	1
1307	LMO3	0	0	0	0	0	3	0	3	63687	genes	3
1308	LMX1A	1	0	1	173409	genes	0	0	0	0	0	1
1309	LNPK	0	0	0	0	0	1	0	1	89677	genes	1
1310	LOC100125776	0	0	0	0	0	0	1	1	74124	genes	1
1311	LOC100126053	0	0	0	0	0	1	0	1	1648	genes	1
1312	LOC100196899	0	0	0	0	0	1	0	1	716	genes	1
1313	LOC100271685	0	0	0	0	0	0	1	1	26787	genes	1
1314	LOC100848574	0	0	0	0	0	1	0	1	23951	genes	1
1315	LOC282685	1	0	1	41026	genes	1	1	2	41026	genes	3
1316	LOC509513	0	3	3	283704	genes	0	1	1	283704	genes	4
1317	LOC511106	0	0	0	0	0	0	1	1	72828	genes	1
1318	LOC512150	0	0	0	0	0	2	0	2	312413	genes	2
1319	LOC512486	0	0	0	0	0	0	1	1	16109	genes	1
1320	LOC517016	0	0	0	0	0	1	0	1	637	genes	1
1321	LOC615514	0	0	0	0	0	0	2	2	18572	genes	2
1322	LOC618367	0	1	1	17875	genes	0	0	0	0	0	1
1323	LOC781423	0	0	0	0	0	0	1	1	57821	genes	1
1324	LOC781988	0	0	0	0	0	1	0	1	37220	genes	1
1325	LOC786410	0	0	0	0	0	0	1	1	6204	genes	1
1326	LOC788142	0	0	0	0	0	1	1	2	30644	genes	2
1327	LOC789612	0	0	0	0	0	0	1	1	3610	genes	1
1328	LONP2	0	0	0	0	0	2	1	3	84708	genes	3
1329	LONRF3	0	1	1	35403	genes	0	0	0	0	0	1
1330	LOXL2	0	0	0	0	0	2	1	3	113146	genes	3
1331	LPAR1	0	0	0	0	0	1	1	2	90552	genes	2
1332	LPCAT2	0	0	0	0	0	1	0	1	64233	genes	1
1333	LPIN1	0	0	0	0	0	1	0	1	81041	genes	1
1334	LPO	0	1	1	29750	genes	0	2	2	29750	genes	3
1335	LPP	0	0	0	0	0	0	2	2	683834	genes	2
1336	LRFN4	0	1	1	2518	genes	0	0	0	0	0	1
1337	LRGUK	3	0	3	101039	genes	7	0	7	101039	genes	10
1338	LRIG2	0	0	0	0	0	1	0	1	61844	genes	1
1339	LRRC17	0	0	0	0	0	0	1	1	35546	genes	1
1340	LRRC2	1	0	1	37268	genes	0	0	0	0	0	1
1341	LRRC28	0	0	0	0	0	1	0	1	189801	genes	1
1342	LRRC42	0	0	0	0	0	2	0	2	20972	genes	2
1343	LRRC49	3	0	3	157600	genes	2	0	2	157600	genes	5
1344	LRRC59	0	1	1	11748	genes	0	3	3	11748	genes	4
1345	LRRC7	0	0	0	0	0	1	0	1	386503	genes	1
1346	LRRC77	0	0	0	0	0	2	0	2	30273	genes	2
1347	LRRC8C	0	0	0	0	0	1	0	1	92870	genes	1
1348	LRRC8D	0	0	0	0	0	0	2	2	130735	genes	2
1349	LRRFIP2	0	0	0	0	0	0	1	1	108928	genes	1
1350	LRRK1	0	0	0	0	0	0	1	1	128099	genes	1
1351	LRRTM3	2	0	2	209409	genes	3	0	3	209409	genes	5
1352	LSM14A	0	0	0	0	0	2	0	2	53525	genes	2
1353	LSM4	1	0	1	12668	genes	1	0	1	12668	genes	2
1354	LSS	1	0	1	27936	genes	1	1	2	27936	genes	3
1355	LTF	0	0	0	0	0	1	0	1	33394	genes	1
1356	LUC7L3	0	0	0	0	0	0	1	1	24908	genes	1
1357	LURAP1L	0	0	0	0	0	1	0	1	54727	genes	1
1358	LUZP2	0	0	0	0	0	8	4	12	515682	genes	12
1359	LY86	0	0	0	0	0	0	1	1	41901	genes	1
1360	LY9	0	0	0	0	0	1	0	1	27408	genes	1
1361	LYRM4	0	3	3	92112	genes	5	0	5	92112	genes	8
1362	LYST	1	0	1	143942	genes	3	1	4	143942	genes	5
1363	LYVE1	0	0	0	0	0	1	0	1	14292	genes	1
1364	MACF1	1	1	2	340650	genes	0	1	1	340650	genes	3
1365	MACROD2	0	0	0	0	0	0	2	2	2323140	genes	2
1366	MACROH2A1	0	0	0	0	0	0	1	1	81434	genes	1
1367	MACROH2A2	1	0	1	52781	genes	0	1	1	52781	genes	2
1368	MAD1L1	0	1	1	237978	genes	0	2	2	237978	genes	3
1369	MADD	0	0	0	0	0	0	1	1	36701	genes	1
1370	MAFF	0	0	0	0	0	1	0	1	9064	genes	1
1371	MAGI3	0	0	0	0	0	2	0	2	258752	genes	2
1372	MAIP1	0	0	0	0	0	0	1	1	11557	genes	1
1373	MAK16	1	0	1	10096	genes	0	0	0	0	0	1
1374	MAML2	1	0	1	401574	genes	2	0	2	401574	genes	3
1375	MAN1A1	2	0	2	173558	genes	3	0	3	173558	genes	5
1376	MAN1A2	0	0	0	0	0	0	3	3	146353	genes	3
1377	MAN2A1	1	0	1	210749	genes	8	0	8	210749	genes	9
1378	MAN2C1	0	0	0	0	0	0	1	1	11584	genes	1
1379	MANBA	0	1	1	127628	genes	0	0	0	0	0	1
1380	MANEA	2	0	2	82321	genes	3	0	3	82321	genes	5
1381	MANSC1	0	0	0	0	0	1	1	2	24144	genes	2
1382	MAP1LC3C	0	0	0	0	0	1	0	1	5871	genes	1
1383	MAP2	0	0	0	0	0	1	0	1	147914	genes	1
1384	MAP2K2	0	0	0	0	0	1	0	1	21292	genes	1
1385	MAP2K5	1	1	2	270760	genes	1	1	2	270760	genes	4
1386	MAP2K6	1	0	1	106379	genes	3	1	4	106379	genes	5
1387	MAP3K5	0	1	1	228648	genes	0	0	0	0	0	1
1388	MAP3K6	0	0	0	0	0	1	0	1	12892	genes	1
1389	MAP4	2	0	2	92538	genes	5	0	5	92538	genes	7
1390	MAP4K2	1	0	1	12865	genes	0	0	0	0	0	1
1391	MAPK1	1	0	1	52733	genes	1	0	1	52733	genes	2
1392	MAPK8IP2	0	0	0	0	0	0	1	1	10148	genes	1
1393	MAPKAP1	0	2	2	232856	genes	0	2	2	232856	genes	4
1394	MAPKAPK5	0	0	0	0	0	1	1	2	33426	genes	2
1395	MAPRE2	1	0	1	116687	genes	3	1	4	116687	genes	5
1396	MAPT	1	1	2	119175	genes	1	1	2	119175	genes	4
1397	MARCHF3	1	0	1	156459	genes	4	0	4	156459	genes	5
1398	MARCHF8	0	0	0	0	0	3	0	3	111059	genes	3
1399	MARK1	0	0	0	0	0	1	0	1	139466	genes	1
1400	MARK2	1	0	1	36663	genes	0	0	0	0	0	1
1401	MARK4	1	0	1	29901	genes	0	0	0	0	0	1
1402	MATN2	1	2	3	172903	genes	2	5	7	172903	genes	10
1403	MB21D2	0	0	0	0	0	1	0	1	120932	genes	1
1404	MBD5	0	0	0	0	0	0	1	1	57971	genes	1
1405	MBNL2	0	0	0	0	0	0	1	1	160660	genes	1
1406	MBOAT1	0	0	0	0	0	0	1	1	110212	genes	1
1407	MBTD1	0	0	0	0	0	0	8	8	64720	genes	8
1408	MCAT	0	0	0	0	0	0	1	1	11618	genes	1
1409	MCC	0	0	0	0	0	1	0	1	321625	genes	1
1410	MCFD2	0	0	0	0	0	1	0	1	9636	genes	1
1411	MCM3	0	0	0	0	0	1	0	1	17385	genes	1
1412	MCM4	1	0	1	11352	genes	1	0	1	11352	genes	2
1413	MCM6	0	0	0	0	0	0	1	1	34613	genes	1
1414	MCUR1	0	0	0	0	0	0	2	2	18946	genes	2
1415	MDGA1	0	0	0	0	0	0	1	1	64255	genes	1
1416	MDM4	0	0	0	0	0	0	1	1	37247	genes	1
1417	MDN1	1	0	1	139575	genes	1	0	1	139575	genes	2
1418	ME1	0	0	0	0	0	1	5	6	188644	genes	6
1419	ME2	0	0	0	0	0	0	1	1	58028	genes	1
1420	ME3	0	1	1	220849	genes	1	1	2	220849	genes	3
1421	MED1	0	0	0	0	0	0	1	1	21075	genes	1
1422	MED12L	0	3	3	360939	genes	0	2	2	360939	genes	5
1423	MED13L	0	1	1	279345	genes	1	9	10	279345	genes	11
1424	MED27	4	1	5	218945	genes	10	0	10	218945	genes	15
1425	MED28	0	1	1	5811	genes	0	0	0	0	0	1
1426	MED4	1	0	1	14481	genes	0	0	0	0	0	1
1427	MEF2D	0	0	0	0	0	1	0	1	30377	genes	1
1428	MEGF10	0	3	3	182330	genes	1	11	12	182330	genes	15
1429	MEIS1	0	0	0	0	0	0	4	4	143329	genes	4
1430	MET	0	0	0	0	0	0	1	1	113228	genes	1
1431	METAP2	0	0	0	0	0	1	0	1	30723	genes	1
1432	METTL13	0	0	0	0	0	0	3	3	16273	genes	3
1433	METTL14	1	1	2	38997	genes	2	2	4	38997	genes	6
1434	METTL21E	0	0	0	0	0	1	0	1	16082	genes	1
1435	METTL22	1	0	1	18836	genes	1	0	1	18836	genes	2
1436	METTL24	0	2	2	125851	genes	4	10	14	125851	genes	16
1437	METTL6	0	0	0	0	0	0	2	2	16356	genes	2
1438	MFN1	1	0	1	44031	genes	0	0	0	0	0	1
1439	MFSD2A	0	0	0	0	0	1	0	1	12829	genes	1
1440	MGAT5	0	1	1	242707	genes	2	0	2	242707	genes	3
1441	MGC137055	0	0	0	0	0	1	0	1	548	genes	1
1442	MGC137454	0	0	0	0	0	0	2	2	269684	genes	2
1443	MGLL	1	0	1	89710	genes	0	0	0	0	0	1
1444	MGRN1	0	0	0	0	0	1	0	1	36679	genes	1
1445	MGST3	0	1	1	23129	genes	0	0	0	0	0	1
1446	MIA3	1	0	1	62224	genes	0	0	0	0	0	1
1447	MICALL2	0	0	0	0	0	1	0	1	19012	genes	1
1448	MICU2	0	0	0	0	0	1	0	1	53701	genes	1
1449	MICU3	0	0	0	0	0	0	8	8	73137	genes	8
1450	MIEF1	0	0	0	0	0	2	0	2	7195	genes	2
1451	MIEF2	0	0	0	0	0	0	1	1	4160	genes	1
1452	MIER1	0	1	1	67154	genes	1	0	1	67154	genes	2
1453	MINPP1	0	1	1	64077	genes	2	2	4	64077	genes	5
1454	MIR2285AE	0	0	0	0	0	2	0	2	61	genes	2
1455	MIR29B-2	0	0	0	0	0	2	0	2	83409	genes	2
1456	MKLN1	0	0	0	0	0	1	1	2	206568	genes	2
1457	MKNK1	0	1	1	45775	genes	0	1	1	45775	genes	2
1458	MKRN2	0	0	0	0	0	1	0	1	36642	genes	1
1459	MLEC	0	0	0	0	0	1	0	1	9996	genes	1
1460	MLH1	0	0	0	0	0	0	1	1	93138	genes	1
1461	MLPH	0	0	0	0	0	1	0	1	45890	genes	1
1462	MLXIP	0	0	0	0	0	1	2	3	60718	genes	3
1463	MMAB	0	0	0	0	0	0	1	1	10562	genes	1
1464	MMD2	2	0	2	62234	genes	5	0	5	62234	genes	7
1465	MME	0	0	0	0	0	0	4	4	116519	genes	4
1466	MMP16	0	0	0	0	0	2	3	5	395011	genes	5
1467	MMP2	1	0	1	26409	genes	0	1	1	26409	genes	2
1468	MND1	1	0	1	79548	genes	1	1	2	79548	genes	3
1469	MOB2	0	0	0	0	0	1	0	1	52692	genes	1
1470	MOB3B	1	0	1	215505	genes	0	0	0	0	0	1
1471	MOCOS	2	0	2	58838	genes	1	0	1	58838	genes	3
1472	MON1A	0	0	0	0	0	1	0	1	11070	genes	1
1473	MORC2	0	0	0	0	0	1	0	1	20758	genes	1
1474	MORN3	0	0	0	0	0	1	0	1	8754	genes	1
1475	MPC1	0	0	0	0	0	1	0	1	13325	genes	1
1476	MPO	0	1	1	11177	genes	0	0	0	0	0	1
1477	MPP7	0	0	0	0	0	2	0	2	223589	genes	2
1478	MPPED2	0	1	1	204258	genes	0	0	0	0	0	1
1479	MPZL1	0	2	2	81860	genes	0	5	5	81860	genes	7
1480	MRAS	1	0	1	65910	genes	0	0	0	0	0	1
1481	MRNIP	0	0	0	0	0	1	0	1	17533	genes	1
1482	MROH1	1	0	1	49760	genes	1	0	1	49760	genes	2
1483	MRPL16	1	0	1	4245	genes	0	0	0	0	0	1
1484	MRPL22	0	0	0	0	0	0	2	2	35553	genes	2
1485	MRPL3	1	0	1	57020	genes	0	0	0	0	0	1
1486	MRPL45	0	0	0	0	0	1	0	1	19274	genes	1
1487	MRPL48	1	1	2	54886	genes	2	1	3	54886	genes	5
1488	MRPS18A	0	0	0	0	0	2	0	2	16312	genes	2
1489	MRPS22	0	1	1	13411	genes	0	0	0	0	0	1
1490	MRPS25	2	0	2	44956	genes	4	0	4	44956	genes	6
1491	MRPS35	0	0	0	0	0	1	0	1	43585	genes	1
1492	MRPS6	0	0	0	0	0	1	0	1	64352	genes	1
1493	MRTFB	0	0	0	0	0	0	1	1	210555	genes	1
1494	MS4A7	0	0	0	0	0	0	1	1	17233	genes	1
1495	MSANTD3	1	0	1	25545	genes	0	0	0	0	0	1
1496	MSI1	0	0	0	0	0	0	2	2	22242	genes	2
1497	MSI2	4	5	9	402384	genes	4	2	6	402384	genes	15
1498	MSMO1	0	0	0	0	0	1	1	2	16692	genes	2
1499	MSR1	0	0	0	0	0	1	0	1	80378	genes	1
1500	MTARC2	0	0	0	0	0	0	1	1	43233	genes	1
1501	MTBP	0	0	0	0	0	0	1	1	76336	genes	1
1502	MTDH	0	0	0	0	0	0	1	1	54168	genes	1
1503	MTF1	0	0	0	0	0	2	0	2	40414	genes	2
1504	MTFP1	0	1	1	3603	genes	1	1	2	3603	genes	3
1505	MTFR1L	0	1	1	15003	genes	2	1	3	15003	genes	4
1506	MTHFD1	0	0	0	0	0	1	0	1	60534	genes	1
1507	MTHFD2L	0	0	0	0	0	7	3	10	146244	genes	10
1508	MTHFS	0	0	0	0	0	1	0	1	17272	genes	1
1509	MTMR2	1	0	1	118393	genes	2	0	2	118393	genes	3
1510	MTMR3	1	0	1	131367	genes	8	3	11	131367	genes	12
1511	MTMR9	0	0	0	0	0	0	5	5	68441	genes	5
1512	MTPN	0	0	0	0	0	4	0	4	76345	genes	4
1513	MTR	6	0	6	127029	genes	3	0	3	127029	genes	9
1514	MTREX	0	0	0	0	0	1	0	1	91240	genes	1
1515	MTUS1	2	1	3	65219	genes	1	2	3	65219	genes	6
1516	MTX1	0	0	0	0	0	0	1	1	4540	genes	1
1517	MUC15	0	0	0	0	0	0	1	1	13264	genes	1
1518	MVB12A	0	0	0	0	0	0	1	1	4065	genes	1
1519	MVK	0	1	1	18920	genes	0	5	5	18920	genes	6
1520	MXD3	1	0	1	4333	genes	0	0	0	0	0	1
1521	MXD4	0	0	0	0	0	1	0	1	11402	genes	1
1522	MXI1	1	0	1	92441	genes	0	0	0	0	0	1
1523	MYBL2	0	0	0	0	0	1	0	1	26554	genes	1
1524	MYBPHL	2	0	2	14603	genes	1	0	1	14603	genes	3
1525	MYCBP2	0	0	0	0	0	0	3	3	270674	genes	3
1526	MYH11	0	0	0	0	0	0	3	3	127451	genes	3
1527	MYH9	1	0	1	85951	genes	1	0	1	85951	genes	2
1528	MYLK	0	0	0	0	0	2	0	2	86202	genes	2
1529	MYO19	0	0	0	0	0	0	5	5	33466	genes	5
1530	MYO1D	2	0	2	360182	genes	6	4	10	360182	genes	12
1531	MYO6	2	0	2	127384	genes	12	6	18	127384	genes	20
1532	MYO9B	0	0	0	0	0	0	1	1	107959	genes	1
1533	MYOF	1	0	1	180141	genes	0	0	0	0	0	1
1534	MYOZ2	0	0	0	0	0	1	0	1	38401	genes	1
1535	MYRFL	1	1	2	125503	genes	0	0	0	0	0	2
1536	MYT1L	0	0	0	0	0	1	0	1	165743	genes	1
1537	N4BP1	0	0	0	0	0	0	3	3	54061	genes	3
1538	NAA25	0	0	0	0	0	0	1	1	61240	genes	1
1539	NAA30	0	1	1	21133	genes	0	0	0	0	0	1
1540	NAB1	0	0	0	0	0	1	0	1	36668	genes	1
1541	NACC2	0	1	1	34870	genes	0	3	3	34870	genes	4
1542	NADSYN1	1	0	1	27800	genes	0	0	0	0	0	1
1543	NALF1	0	1	1	609261	genes	1	0	1	609261	genes	2
1544	NAP1L4	0	1	1	52649	genes	0	1	1	52649	genes	2
1545	NAPB	0	0	0	0	0	1	0	1	37647	genes	1
1546	NARS2	0	0	0	0	0	1	0	1	137413	genes	1
1547	NAT10	0	0	0	0	0	0	1	1	38836	genes	1
1548	NAV3	0	1	1	379847	genes	3	2	5	379847	genes	6
1549	NBAS	0	4	4	468052	genes	5	8	13	468052	genes	17
1550	NBN	0	0	0	0	0	1	0	1	55611	genes	1
1551	NCAM1	1	1	2	359813	genes	2	0	2	359813	genes	4
1552	NCAPD2	0	0	0	0	0	0	1	1	24833	genes	1
1553	NCF2	0	0	0	0	0	1	0	1	32794	genes	1
1554	NCK1	0	1	1	76327	genes	1	0	1	76327	genes	2
1555	NDE1	0	0	0	0	0	1	0	1	46772	genes	1
1556	NDFIP2	0	0	0	0	0	1	0	1	70546	genes	1
1557	NDOR1	1	0	1	8600	genes	0	0	0	0	0	1
1558	NDST1	0	0	0	0	0	1	0	1	84451	genes	1
1559	NDST4	1	0	1	277966	genes	2	0	2	277966	genes	3
1560	NDUFA5	0	0	0	0	0	1	0	1	15952	genes	1
1561	NDUFAF2	0	0	0	0	0	0	1	1	160594	genes	1
1562	NDUFAF5	0	0	0	0	0	0	2	2	24608	genes	2
1563	NDUFS4	0	0	0	0	0	0	3	3	115593	genes	3
1564	NDUFV1	0	0	0	0	0	0	1	1	5972	genes	1
1565	NDUFV3	0	0	0	0	0	1	0	1	11336	genes	1
1566	NEDD1	0	0	0	0	0	0	1	1	52009	genes	1
1567	NEGR1	0	1	1	1034994	genes	0	2	2	1034994	genes	3
1568	NEIL1	0	0	0	0	0	1	0	1	6230	genes	1
1569	NEIL2	0	0	0	0	0	0	2	2	10420	genes	2
1570	NEIL3	0	0	0	0	0	0	1	1	46222	genes	1
1571	NEK6	0	0	0	0	0	1	0	1	86222	genes	1
1572	NEMF	0	0	0	0	0	1	0	1	54042	genes	1
1573	NENF	1	0	1	6574	genes	0	0	0	0	0	1
1574	NET1	0	0	0	0	0	1	0	1	11792	genes	1
1575	NEU3	0	0	0	0	0	2	1	3	14534	genes	3
1576	NEURL1	1	0	1	72576	genes	0	0	0	0	0	1
1577	NFE2L2	0	0	0	0	0	0	1	1	32575	genes	1
1578	NFKBID	0	0	0	0	0	0	1	1	8290	genes	1
1579	NFS1	1	0	1	17249	genes	1	0	1	17249	genes	2
1580	NFX1	0	0	0	0	0	1	1	2	66373	genes	2
1581	NGLY1	0	0	0	0	0	0	1	1	58092	genes	1
1582	NHLRC2	0	6	6	55452	genes	2	6	8	55452	genes	14
1583	NID1	0	0	0	0	0	0	1	1	96907	genes	1
1584	NID2	0	0	0	0	0	0	1	1	92579	genes	1
1585	NINJ2	1	0	1	72292	genes	5	1	6	72292	genes	7
1586	NIPAL3	0	0	0	0	0	1	0	1	49663	genes	1
1587	NIPBL	0	0	0	0	0	0	1	1	205463	genes	1
1588	NIPSNAP1	0	0	0	0	0	2	0	2	15630	genes	2
1589	NIPSNAP2	1	0	1	26886	genes	2	1	3	26886	genes	4
1590	NKAIN2	1	2	3	629145	genes	9	10	19	629145	genes	22
1591	NKD1	0	0	0	0	0	1	0	1	91892	genes	1
1592	NLE1	0	0	0	0	0	0	1	1	8781	genes	1
1593	NLGN1	1	0	1	952872	genes	2	0	2	952872	genes	3
1594	NLK	0	0	0	0	0	0	1	1	129607	genes	1
1595	NME1	2	0	2	11096	genes	2	0	2	11096	genes	4
1596	NME7	2	0	2	245360	genes	3	3	6	245360	genes	8
1597	NMNAT2	0	0	0	0	0	1	0	1	162167	genes	1
1598	NOD1	0	1	1	36511	genes	0	0	0	0	0	1
1599	NOL10	1	0	1	89920	genes	0	0	0	0	0	1
1600	NOL11	2	2	4	18688	genes	0	1	1	18688	genes	5
1601	NOL12	1	0	1	5022	genes	2	0	2	5022	genes	3
1602	NOL4	0	1	1	487638	genes	2	6	8	487638	genes	9
1603	NOP56	0	0	0	0	0	1	0	1	5239	genes	1
1604	NOS1AP	5	1	6	341485	genes	4	2	6	341485	genes	12
1605	NOS2	0	0	0	0	0	4	0	4	40923	genes	4
1606	NOX5	1	0	1	32008	genes	0	0	0	0	0	1
1607	NPEPPS	0	0	0	0	0	2	0	2	104133	genes	2
1608	NPHP1	1	0	1	65484	genes	2	2	4	65484	genes	5
1609	NPLOC4	1	0	1	48587	genes	0	0	0	0	0	1
1610	NPR3	0	1	1	76419	genes	0	0	0	0	0	1
1611	NR1H4	0	0	0	0	0	0	1	1	51215	genes	1
1612	NR3C1	0	0	0	0	0	1	1	2	118487	genes	2
1613	NR3C2	0	0	0	0	0	1	0	1	429492	genes	1
1614	NR5A2	1	0	1	128044	genes	4	0	4	128044	genes	5
1615	NRAP	4	1	5	75360	genes	11	5	16	75360	genes	21
1616	NRDE2	1	0	1	48317	genes	5	2	7	48317	genes	8
1617	NRF1	2	1	3	94023	genes	4	3	7	94023	genes	10
1618	NRG1	1	2	3	209956	genes	2	6	8	209956	genes	11
1619	NRG3	2	1	3	1236097	genes	2	4	6	1236097	genes	9
1620	NRP2	0	1	1	116659	genes	0	0	0	0	0	1
1621	NRXN2	0	0	0	0	0	1	0	1	100854	genes	1
1622	NRXN3	0	0	0	0	0	0	1	1	605370	genes	1
1623	NSD3	1	0	1	98022	genes	0	1	1	98022	genes	2
1624	NSF	0	0	0	0	0	8	0	8	148121	genes	8
1625	NSMCE1	0	0	0	0	0	0	1	1	35462	genes	1
1626	NSMCE2	1	0	1	238183	genes	0	1	1	238183	genes	2
1627	NSRP1	0	0	0	0	0	0	1	1	45305	genes	1
1628	NSUN4	0	0	0	0	0	1	1	2	22368	genes	2
1629	NSUN6	0	0	0	0	0	0	1	1	77911	genes	1
1630	NT5DC1	0	0	0	0	0	1	1	2	107331	genes	2
1631	NT5M	0	0	0	0	0	1	0	1	12837	genes	1
1632	NTF3	1	0	1	77631	genes	0	0	0	0	0	1
1633	NTM	1	0	1	417571	genes	1	0	1	417571	genes	2
1634	NTN1	0	1	1	184677	genes	1	0	1	184677	genes	2
1635	NTN4	0	0	0	0	0	1	0	1	130008	genes	1
1636	NTNG1	0	1	1	367407	genes	0	4	4	367407	genes	5
1637	NTNG2	0	1	1	67392	genes	1	1	2	67392	genes	3
1638	NTPCR	0	3	3	38282	genes	0	5	5	38282	genes	8
1639	NTRK3	0	2	2	422807	genes	0	2	2	422807	genes	4
1640	NTS	0	0	0	0	0	1	0	1	11671	genes	1
1641	NUDCD3	0	0	0	0	0	1	0	1	70451	genes	1
1642	NUDT21	0	0	0	0	0	5	0	5	14607	genes	5
1643	NUFIP1	2	0	2	39134	genes	2	0	2	39134	genes	4
1644	NUP153	0	0	0	0	0	0	1	1	70910	genes	1
1645	NUP155	0	0	0	0	0	1	0	1	49713	genes	1
1646	NUP160	0	0	0	0	0	2	0	2	43577	genes	2
1647	NUP188	0	0	0	0	0	0	1	1	43204	genes	1
1648	NUP205	0	0	0	0	0	1	0	1	80522	genes	1
1649	NUP210	0	0	0	0	0	2	0	2	91396	genes	2
1650	NUP214	0	1	1	90945	genes	0	0	0	0	0	1
1651	NUP42	0	0	0	0	0	1	0	1	14071	genes	1
1652	NUP50	0	0	0	0	0	1	0	1	18937	genes	1
1653	NUP85	0	0	0	0	0	1	0	1	27914	genes	1
1654	NUP93	0	0	0	0	0	0	1	1	102894	genes	1
1655	NUS1	0	1	1	26827	genes	0	0	0	0	0	1
1656	NXN	0	0	0	0	0	2	0	2	163946	genes	2
1657	NXPH1	1	0	1	368365	genes	9	0	9	368365	genes	10
1658	NXPH2	1	0	1	126632	genes	1	2	3	126632	genes	4
1659	NXPH3	0	1	1	4407	genes	0	1	1	4407	genes	2
1660	OAS1Z	0	0	0	0	0	0	1	1	7838	genes	1
1661	OAS2	1	0	1	27941	genes	0	0	0	0	0	1
1662	OASL	0	0	0	0	0	1	2	3	16423	genes	3
1663	OAT	0	0	0	0	0	1	1	2	19321	genes	2
1664	ODAD4	0	0	0	0	0	0	1	1	21869	genes	1
1665	ODAM	0	0	0	0	0	2	0	2	8853	genes	2
1666	ODF3	0	0	0	0	0	1	0	1	3548	genes	1
1667	OGDH	0	0	0	0	0	1	0	1	72938	genes	1
1668	OGDHL	0	0	0	0	0	1	1	2	26904	genes	2
1669	OLA1	0	1	1	164910	genes	0	1	1	164910	genes	2
1670	OLFM1	1	2	3	21181	genes	1	1	2	21181	genes	5
1671	OLFML1	1	0	1	30342	genes	4	0	4	30342	genes	5
1672	OLFML2B	0	1	1	49176	genes	0	0	0	0	0	1
1673	OPA3	1	0	1	66717	genes	1	0	1	66717	genes	2
1674	OPALIN	0	0	0	0	0	1	0	1	14299	genes	1
1675	OPCML	2	1	3	526247	genes	6	2	8	526247	genes	11
1676	OPLAH	1	0	1	9146	genes	0	0	0	0	0	1
1677	OPTN	0	1	1	38869	genes	0	0	0	0	0	1
1678	ORAI1	3	0	3	14949	genes	0	0	0	0	0	3
1679	ORC2	0	0	0	0	0	1	0	1	37831	genes	1
1680	ORC4	0	0	0	0	0	1	3	4	94397	genes	4
1681	ORC5	0	0	0	0	0	1	0	1	88103	genes	1
1682	ORMDL1	0	0	0	0	0	0	1	1	12451	genes	1
1683	OS9	0	0	0	0	0	1	0	1	34234	genes	1
1684	OSBP2	3	1	4	153615	genes	7	3	10	153615	genes	14
1685	OSBPL2	0	1	1	32255	genes	0	0	0	0	0	1
1686	OSBPL3	0	0	0	0	0	4	7	11	196094	genes	11
1687	OSBPL9	1	0	1	162052	genes	1	0	1	162052	genes	2
1688	OSGEPL1	0	0	0	0	0	1	0	1	10907	genes	1
1689	OSTM1	0	0	0	0	0	0	1	1	42902	genes	1
1690	OTC	0	0	0	0	0	0	1	1	76547	genes	1
1691	OTOP2	0	0	0	0	0	1	0	1	8808	genes	1
1692	OTUD7A	0	0	0	0	0	0	1	1	159907	genes	1
1693	OTUD7B	0	1	1	54665	genes	0	2	2	54665	genes	3
1694	OVOL1	2	0	2	11041	genes	1	0	1	11041	genes	3
1695	OXNAD1	0	0	0	0	0	1	0	1	44113	genes	1
1696	OXTR	0	0	0	0	0	1	1	2	9667	genes	2
1697	P2RX4	0	2	2	16149	genes	0	1	1	16149	genes	3
1698	P2RX7	0	2	2	57151	genes	0	4	4	57151	genes	6
1699	P2RY12	0	1	1	52254	genes	0	0	0	0	0	1
1700	P3H2	1	0	1	179382	genes	0	0	0	0	0	1
1701	P4HA3	0	0	0	0	0	2	1	3	40951	genes	3
1702	PACC1	0	1	1	34651	genes	0	1	1	34651	genes	2
1703	PACS1	0	1	1	148515	genes	1	0	1	148515	genes	2
1704	PACSIN2	0	1	1	117211	genes	1	2	3	117211	genes	4
1705	PADI2	0	0	0	0	0	0	1	1	48475	genes	1
1706	PADI4	0	0	0	0	0	0	1	1	27809	genes	1
1707	PAG16	1	0	1	237785	genes	1	0	1	237785	genes	2
1708	PAH	0	0	0	0	0	0	1	1	90203	genes	1
1709	PAK1	0	0	0	0	0	1	0	1	96247	genes	1
1710	PAK4	0	0	0	0	0	0	1	1	47423	genes	1
1711	PAK5	0	0	0	0	0	2	0	2	424649	genes	2
1712	PALD1	0	0	0	0	0	1	3	4	39632	genes	4
1713	PALM2	3	3	6	160750	genes	5	7	12	160750	genes	18
1714	PAM	0	0	0	0	0	1	0	1	187513	genes	1
1715	PAMR1	0	1	1	77510	genes	0	1	1	77510	genes	2
1716	PANK3	1	0	1	21812	genes	4	0	4	21812	genes	5
1717	PANX3	0	0	0	0	0	1	0	1	7531	genes	1
1718	PAPOLG	0	0	0	0	0	0	2	2	29972	genes	2
1719	PAPSS2	0	5	5	111883	genes	0	5	5	111883	genes	10
1720	PARG	0	3	3	114702	genes	0	1	1	114702	genes	4
1721	PARN	0	0	0	0	0	0	2	2	179338	genes	2
1722	PARP1	1	0	1	41350	genes	1	0	1	41350	genes	2
1723	PARP11	0	0	0	0	0	0	1	1	33696	genes	1
1724	PARP8	1	0	1	191409	genes	2	1	3	191409	genes	4
1725	PARVB	2	0	2	115341	genes	12	0	12	115341	genes	14
1726	PARVG	0	0	0	0	0	1	0	1	25311	genes	1
1727	PATJ	0	0	0	0	0	2	2	4	379125	genes	4
1728	PATL1	0	0	0	0	0	3	0	3	28160	genes	3
1729	PAXBP1	0	0	0	0	0	2	0	2	32826	genes	2
1730	PBX1	0	1	1	293244	genes	1	1	2	293244	genes	3
1731	PBX3	0	2	2	224671	genes	0	0	0	0	0	2
1732	PBX4	0	0	0	0	0	1	2	3	54650	genes	3
1733	PC	1	1	2	102742	genes	1	6	7	102742	genes	9
1734	PCBP3	0	1	1	229343	genes	4	1	5	229343	genes	6
1735	PCCA	0	0	0	0	0	2	0	2	362022	genes	2
1736	PCDH17	0	0	0	0	0	2	0	2	114938	genes	2
1737	PCDH7	1	2	3	469891	genes	3	8	11	469891	genes	14
1738	PCED1A	2	0	2	5112	genes	0	0	0	0	0	2
1739	PCGF5	1	3	4	118516	genes	2	1	3	118516	genes	7
1740	PCK1	0	1	1	6126	genes	0	0	0	0	0	1
1741	PCOLCE2	1	0	1	99363	genes	5	0	5	99363	genes	6
1742	PCP4	1	0	1	68523	genes	0	0	0	0	0	1
1743	PCSK2	0	0	0	0	0	2	0	2	238096	genes	2
1744	PCTP	0	0	0	0	0	1	0	1	24819	genes	1
1745	PDCD11	0	2	2	40986	genes	0	2	2	40986	genes	4
1746	PDCD4	0	1	1	26631	genes	1	0	1	26631	genes	2
1747	PDE11A	0	0	0	0	0	1	0	1	423445	genes	1
1748	PDE2A	0	0	0	0	0	1	0	1	96691	genes	1
1749	PDE4B	0	0	0	0	0	1	1	2	449622	genes	2
1750	PDE6C	2	0	2	53180	genes	0	0	0	0	0	2
1751	PDE6D	0	0	0	0	0	1	0	1	55070	genes	1
1752	PDE6H	0	0	0	0	0	1	0	1	9933	genes	1
1753	PDE8A	0	1	1	142784	genes	3	2	5	142784	genes	6
1754	PDGFD	0	0	0	0	0	1	0	1	276596	genes	1
1755	PDGFRL	0	0	0	0	0	2	1	3	73627	genes	3
1756	PDIA5	1	0	1	92765	genes	1	0	1	92765	genes	2
1757	PDIK1L	0	0	0	0	0	1	0	1	7693	genes	1
1758	PDK2	0	0	0	0	0	1	0	1	16270	genes	1
1759	PDK3	0	0	0	0	0	0	1	1	82320	genes	1
1760	PDLIM1	1	0	1	40627	genes	0	0	0	0	0	1
1761	PDLIM2	0	0	0	0	0	1	0	1	13150	genes	1
1762	PDLIM5	0	0	0	0	0	1	0	1	148073	genes	1
1763	PDXDC1	0	0	0	0	0	1	0	1	54794	genes	1
1764	PEAR1	0	0	0	0	0	1	1	2	20735	genes	2
1765	PEBP4	0	0	0	0	0	0	5	5	225642	genes	5
1766	PEF1	0	0	0	0	0	1	0	1	18081	genes	1
1767	PEG10	0	0	0	0	0	2	0	2	12705	genes	2
1768	PEG3	0	1	1	23557	genes	0	0	0	0	0	1
1769	PEX1	0	0	0	0	0	1	1	2	81400	genes	2
1770	PEX2	0	0	0	0	0	0	2	2	15344	genes	2
1771	PEX7	0	0	0	0	0	1	0	1	78613	genes	1
1772	PFDN2	0	1	1	11947	genes	1	0	1	11947	genes	2
1773	PFKFB1	0	0	0	0	0	1	0	1	94648	genes	1
1774	PFKFB2	0	0	0	0	0	1	0	1	26745	genes	1
1775	PFKFB3	2	0	2	25854	genes	4	0	4	25854	genes	6
1776	PFKL	0	1	1	27195	genes	0	1	1	27195	genes	2
1777	PFKP	0	1	1	52927	genes	0	2	2	52927	genes	3
1778	PGAP2	1	0	1	13510	genes	0	0	0	0	0	1
1779	PGAP3	1	0	1	13930	genes	0	0	0	0	0	1
1780	PGD	0	1	1	14724	genes	0	2	2	14724	genes	3
1781	PGM2L1	1	1	2	52492	genes	0	1	1	52492	genes	3
1782	PGR	0	0	0	0	0	1	0	1	112209	genes	1
1783	PGS1	3	1	4	37249	genes	0	0	0	0	0	4
1784	PHACTR1	1	2	3	520093	genes	4	4	8	520093	genes	11
1785	PHAX	1	0	1	12436	genes	0	0	0	0	0	1
1786	PHF10	0	0	0	0	0	1	0	1	20137	genes	1
1787	PHF11	0	0	0	0	0	2	0	2	33901	genes	2
1788	PHF21A	1	0	1	151122	genes	1	0	1	151122	genes	2
1789	PHRF1	2	1	3	22915	genes	4	0	4	22915	genes	7
1790	PHTF1	0	0	0	0	0	2	0	2	71842	genes	2
1791	PHYHIPL	0	0	0	0	0	0	1	1	95036	genes	1
1792	PHYKPL	0	0	0	0	0	0	1	1	25299	genes	1
1793	PICK1	1	0	1	16857	genes	0	0	0	0	0	1
1794	PID1	1	0	1	266578	genes	0	1	1	266578	genes	2
1795	PIGP	0	0	0	0	0	1	0	1	12710	genes	1
1796	PIGR	1	1	2	17555	genes	0	0	0	0	0	2
1797	PIK3C2G	0	1	1	443218	genes	7	8	15	443218	genes	16
1798	PIK3CB	0	0	0	0	0	4	3	7	178153	genes	7
1799	PIK3IP1	0	1	1	10689	genes	0	0	0	0	0	1
1800	PIK3R1	0	0	0	0	0	1	0	1	80121	genes	1
1801	PIK3R3	0	0	0	0	0	1	3	4	100738	genes	4
1802	PIK3R4	2	0	2	86462	genes	2	0	2	86462	genes	4
1803	PILRA	0	1	1	17402	genes	0	0	0	0	0	1
1804	PINK1	0	0	0	0	0	2	0	2	20391	genes	2
1805	PIP4K2B	0	1	1	22319	genes	0	2	2	22319	genes	3
1806	PIR	0	0	0	0	0	0	1	1	98107	genes	1
1807	PISD	1	0	1	27379	genes	2	0	2	27379	genes	3
1808	PITPNB	0	0	0	0	0	0	1	1	61258	genes	1
1809	PITPNM2	0	1	1	85293	genes	3	3	6	85293	genes	7
1810	PIWIL1	0	1	1	34647	genes	1	2	3	34647	genes	4
1811	PIWIL3	1	2	3	25332	genes	1	0	1	25332	genes	4
1812	PJA2	0	0	0	0	0	0	1	1	70070	genes	1
1813	PKIA	0	0	0	0	0	1	1	2	99920	genes	2
1814	PKIB	0	0	0	0	0	2	0	2	120417	genes	2
1815	PKN2	0	1	1	133597	genes	0	9	9	133597	genes	10
1816	PLA2G1B	1	1	2	7067	genes	3	0	3	7067	genes	5
1817	PLA2G4A	0	1	1	174251	genes	0	1	1	174251	genes	2
1818	PLA2G5	1	0	1	20598	genes	0	1	1	20598	genes	2
1819	PLA2R1	0	1	1	133494	genes	0	0	0	0	0	1
1820	PLAAT1	0	1	1	19750	genes	0	0	0	0	0	1
1821	PLAC8L1	0	0	0	0	0	0	2	2	20793	genes	2
1822	PLBD1	0	0	0	0	0	1	0	1	89032	genes	1
1823	PLBD2	1	0	1	22332	genes	1	0	1	22332	genes	2
1824	PLCB1	4	2	6	860904	genes	16	4	20	860904	genes	26
1825	PLCB2	1	0	1	20891	genes	0	0	0	0	0	1
1826	PLCB4	1	1	2	198495	genes	6	4	10	198495	genes	12
1827	PLCL1	0	0	0	0	0	0	7	7	367611	genes	7
1828	PLCL2	3	0	3	213500	genes	5	4	9	213500	genes	12
1829	PLCZ1	0	0	0	0	0	0	2	2	48720	genes	2
1830	PLD5	4	0	4	424210	genes	8	0	8	424210	genes	12
1831	PLEK	0	0	0	0	0	1	0	1	25787	genes	1
1832	PLEKHA2	0	1	1	60441	genes	1	0	1	60441	genes	2
1833	PLEKHM3	0	0	0	0	0	1	0	1	217244	genes	1
1834	PLEKHO2	0	0	0	0	0	0	1	1	22318	genes	1
1835	PLG	0	0	0	0	0	0	1	1	47618	genes	1
1836	PLLP	0	0	0	0	0	1	0	1	30076	genes	1
1837	PLOD2	0	0	0	0	0	2	0	2	121174	genes	2
1838	PLPP1	0	0	0	0	0	1	0	1	102563	genes	1
1839	PLPP7	0	0	0	0	0	0	1	1	15222	genes	1
1840	PLS1	0	0	0	0	0	1	0	1	93597	genes	1
1841	PLSCR2	0	0	0	0	0	1	0	1	27747	genes	1
1842	PLXDC1	2	1	3	66527	genes	1	2	3	66527	genes	6
1843	PLXNA2	2	0	2	206790	genes	3	0	3	206790	genes	5
1844	PLXNA4	1	1	2	401616	genes	5	1	6	401616	genes	8
1845	PML	0	1	1	42785	genes	0	0	0	0	0	1
1846	PMM2	1	0	1	30119	genes	0	0	0	0	0	1
1847	PMP2	0	0	0	0	0	0	1	1	5144	genes	1
1848	PMP22	0	0	0	0	0	1	0	1	25743	genes	1
1849	PMPCA	0	0	0	0	0	0	2	2	9911	genes	2
1850	PMS1	2	0	2	111906	genes	2	0	2	111906	genes	4
1851	PMS2	1	0	1	23300	genes	1	0	1	23300	genes	2
1852	PNLIP	0	0	0	0	0	0	1	1	20102	genes	1
1853	PNPLA4	0	0	0	0	0	1	0	1	45158	genes	1
1854	PNPLA6	0	0	0	0	0	1	0	1	24048	genes	1
1855	POGZ	0	0	0	0	0	1	0	1	47043	genes	1
1856	POLA1	0	0	0	0	0	0	1	1	295060	genes	1
1857	POLA2	0	0	0	0	0	0	1	1	26928	genes	1
1858	POLB	0	1	1	24821	genes	0	0	0	0	0	1
1859	POLD3	0	0	0	0	0	1	2	3	44345	genes	3
1860	POLG2	2	0	2	16104	genes	0	0	0	0	0	2
1861	POLH	1	0	1	29129	genes	0	0	0	0	0	1
1862	POLR3A	1	0	1	49072	genes	0	0	0	0	0	1
1863	POLR3C	1	0	1	13199	genes	1	0	1	13199	genes	2
1864	POP1	2	0	2	28844	genes	3	0	3	28844	genes	5
1865	POU6F2	1	0	1	389117	genes	3	0	3	389117	genes	4
1866	PPAPDC1A	0	0	0	0	0	1	1	2	147057	genes	2
1867	PPARA	0	1	1	68058	genes	0	4	4	68058	genes	5
1868	PPARG-TSEN2	0	0	0	0	0	0	1	1	214416	genes	1
1869	PPARGC1A	0	0	0	0	0	0	1	1	106814	genes	1
1870	PPCDC	0	0	0	0	0	1	0	1	22504	genes	1
1871	PPFIA1	0	0	0	0	0	0	1	1	74780	genes	1
1872	PPFIBP1	0	0	0	0	0	1	0	1	207300	genes	1
1873	PPIB	0	0	0	0	0	1	0	1	5906	genes	1
1874	PPIE	0	0	0	0	0	2	0	2	16250	genes	2
1875	PPIP5K1	0	0	0	0	0	1	0	1	34455	genes	1
1876	PPM1H	1	0	1	302984	genes	0	0	0	0	0	1
1877	PPP1CC	0	0	0	0	0	1	0	1	19067	genes	1
1878	PPP1R16B	0	1	1	107424	genes	0	2	2	107424	genes	3
1879	PPP1R21	1	1	2	72357	genes	1	3	4	72357	genes	6
1880	PPP1R37	1	0	1	37851	genes	1	0	1	37851	genes	2
1881	PPP1R8	0	0	0	0	0	1	0	1	18037	genes	1
1882	PPP1R9A	0	0	0	0	0	0	2	2	343017	genes	2
1883	PPP2R2A	0	0	0	0	0	1	1	2	76640	genes	2
1884	PPP2R2B	0	0	0	0	0	1	0	1	509482	genes	1
1885	PPP2R5A	0	0	0	0	0	0	2	2	72230	genes	2
1886	PPP2R5E	0	0	0	0	0	1	0	1	156146	genes	1
1887	PPP4R3A	0	0	0	0	0	1	0	1	34668	genes	1
1888	PPT1	0	2	2	16372	genes	0	0	0	0	0	2
1889	PPT2	0	1	1	7425	genes	0	0	0	0	0	1
1890	PRCP	0	1	1	86040	genes	0	0	0	0	0	1
1891	PRDM10	0	0	0	0	0	1	0	1	63498	genes	1
1892	PRDM5	0	1	1	250679	genes	0	1	1	250679	genes	2
1893	PRDM6	0	0	0	0	0	1	0	1	108266	genes	1
1894	PRDX5	0	1	1	3109	genes	0	0	0	0	0	1
1895	PREP	0	1	1	132144	genes	0	0	0	0	0	1
1896	PREX2	0	0	0	0	0	0	5	5	293528	genes	5
1897	PRG3	1	0	1	4045	genes	0	0	0	0	0	1
1898	PRIM2	0	0	0	0	0	1	0	1	333897	genes	1
1899	PRIMPOL	0	3	3	46433	genes	1	1	2	46433	genes	5
1900	PRKAR1A	1	0	1	14080	genes	0	0	0	0	0	1
1901	PRKCA	1	0	1	304707	genes	12	0	12	304707	genes	13
1902	PRKCB	0	2	2	369802	genes	3	3	6	369802	genes	8
1903	PRKCH	0	1	1	231154	genes	6	9	15	231154	genes	16
1904	PRKCQ	2	0	2	91445	genes	4	1	5	91445	genes	7
1905	PRKDC	1	1	2	126741	genes	1	0	1	126741	genes	3
1906	PRKG1	6	2	8	1414869	genes	12	4	16	1414869	genes	24
1907	PRKN	9	2	11	1225668	genes	9	6	15	1225668	genes	26
1908	PRMT2	1	0	1	24597	genes	1	0	1	24597	genes	2
1909	PRMT3	0	0	0	0	0	0	1	1	121762	genes	1
1910	PROKR1	0	0	0	0	0	0	3	3	12185	genes	3
1911	PRP4	3	0	3	21318	genes	0	0	0	0	0	3
1912	PRPF31	1	0	1	11421	genes	0	0	0	0	0	1
1913	PRR5L	0	1	1	78708	genes	0	0	0	0	0	1
1914	PRRC1	0	1	1	46379	genes	1	2	3	46379	genes	4
1915	PRRX1	1	1	2	74219	genes	0	2	2	74219	genes	4
1916	PRSS12	3	1	4	76244	genes	3	0	3	76244	genes	7
1917	PRSS35	1	0	1	19178	genes	0	0	0	0	0	1
1918	PRSS54	0	0	0	0	0	0	1	1	12902	genes	1
1919	PSAP	1	0	1	32473	genes	1	0	1	32473	genes	2
1920	PSEN2	0	0	0	0	0	1	1	2	26358	genes	2
1921	PSMA5	0	0	0	0	0	1	0	1	21025	genes	1
1922	PSMC1	0	0	0	0	0	3	0	3	12600	genes	3
1923	PSMD1	1	0	1	81434	genes	0	0	0	0	0	1
1924	PSMD12	0	0	0	0	0	0	1	1	20376	genes	1
1925	PSMD13	0	1	1	19746	genes	2	0	2	19746	genes	3
1926	PSMD9	2	0	2	14747	genes	0	0	0	0	0	2
1927	PSPH	0	0	0	0	0	1	0	1	22106	genes	1
1928	PSTPIP1	1	5	6	44402	genes	0	9	9	44402	genes	15
1929	PTAFR	1	0	1	1029	genes	0	0	0	0	0	1
1930	PTEN	1	0	1	97910	genes	1	0	1	97910	genes	2
1931	PTER	0	0	0	0	0	0	1	1	75837	genes	1
1932	PTK2	0	0	0	0	0	1	0	1	192887	genes	1
1933	PTK2B	0	0	0	0	0	5	0	5	138286	genes	5
1934	PTPN2	0	0	0	0	0	0	1	1	68024	genes	1
1935	PTPN22	0	1	1	55973	genes	0	1	1	55973	genes	2
1936	PTPN3	1	0	1	78351	genes	1	2	3	78351	genes	4
1937	PTPN5	0	0	0	0	0	2	0	2	58516	genes	2
1938	PTPRA	1	0	1	170900	genes	7	1	8	170900	genes	9
1939	PTPRC	0	0	0	0	0	1	0	1	129402	genes	1
1940	PTPRE	0	0	0	0	0	0	1	1	44850	genes	1
1941	PTPRF	0	0	0	0	0	1	0	1	84288	genes	1
1942	PTPRG	0	0	0	0	0	2	2	4	770432	genes	4
1943	PTPRK	1	1	2	612902	genes	0	6	6	612902	genes	8
1944	PTPRQ	0	0	0	0	0	0	1	1	231544	genes	1
1945	PTPRR	0	0	0	0	0	1	0	1	272986	genes	1
1946	PTPRU	1	0	1	88369	genes	3	0	3	88369	genes	4
1947	PUDP	0	2	2	66539	genes	1	0	1	66539	genes	3
1948	PYGB	0	0	0	0	0	1	0	1	35583	genes	1
1949	PYROXD1	0	0	0	0	0	2	1	3	26620	genes	3
1950	R3HDM2	0	0	0	0	0	1	0	1	110192	genes	1
1951	RAB15	0	0	0	0	0	3	0	3	20468	genes	3
1952	RAB20	0	0	0	0	0	1	0	1	30267	genes	1
1953	RAB21	1	0	1	32460	genes	0	0	0	0	0	1
1954	RAB22A	0	0	0	0	0	1	0	1	48238	genes	1
1955	RAB24	0	0	0	0	0	1	0	1	4759	genes	1
1956	RAB27B	0	0	0	0	0	0	1	1	61301	genes	1
1957	RAB28	0	0	0	0	0	1	0	1	97961	genes	1
1958	RAB2A	0	0	0	0	0	1	0	1	72196	genes	1
1959	RAB35	0	1	1	18671	genes	0	0	0	0	0	1
1960	RAB37	2	0	2	67137	genes	2	0	2	67137	genes	4
1961	RAB39A	0	1	1	33678	genes	0	0	0	0	0	1
1962	RAB3B	0	0	0	0	0	1	0	1	67937	genes	1
1963	RAB3IL1	1	0	1	18516	genes	0	0	0	0	0	1
1964	RAB6A	2	0	2	90839	genes	4	1	5	90839	genes	7
1965	RAB6B	0	1	1	57714	genes	0	1	1	57714	genes	2
1966	RAB7B	0	0	0	0	0	1	0	1	28261	genes	1
1967	RAB8B	0	4	4	70037	genes	1	7	8	70037	genes	12
1968	RABEP2	0	0	0	0	0	2	0	2	12250	genes	2
1969	RABEPK	0	1	1	21508	genes	0	0	0	0	0	1
1970	RAC1	1	0	1	17623	genes	1	0	1	17623	genes	2
1971	RAD18	0	1	1	110759	genes	0	2	2	110759	genes	3
1972	RAD50	0	1	1	107407	genes	0	0	0	0	0	1
1973	RAD51AP1	1	0	1	17731	genes	0	0	0	0	0	1
1974	RAD51B	1	0	1	617794	genes	1	0	1	617794	genes	2
1975	RAD51D	0	1	1	11690	genes	0	2	2	11690	genes	3
1976	RAD52	0	0	0	0	0	0	2	2	25687	genes	2
1977	RAD9B	0	0	0	0	0	2	0	2	28621	genes	2
1978	RADIL	0	0	0	0	0	1	1	2	49912	genes	2
1979	RALGPS1	0	3	3	297305	genes	2	1	3	297305	genes	6
1980	RALGPS2	0	0	0	0	0	0	1	1	159631	genes	1
1981	RAP1A	0	0	0	0	0	0	2	2	87972	genes	2
1982	RAP1B	0	0	0	0	0	1	0	1	43869	genes	1
1983	RAP1GAP	1	0	1	70126	genes	0	1	1	70126	genes	2
1984	RAP1GDS1	1	0	1	150604	genes	0	0	0	0	0	1
1985	RAPGEF2	0	0	0	0	0	2	2	4	96500	genes	4
1986	RAPGEF4	0	0	0	0	0	0	2	2	330120	genes	2
1987	RARA	1	0	1	35268	genes	0	1	1	35268	genes	2
1988	RASA2	0	0	0	0	0	1	1	2	123560	genes	2
1989	RASA3	0	0	0	0	0	5	0	5	79689	genes	5
1990	RASGEF1B	0	0	0	0	0	0	1	1	38232	genes	1
1991	RASGEF1C	0	3	3	105414	genes	0	9	9	105414	genes	12
1992	RASGRF1	0	0	0	0	0	2	0	2	100580	genes	2
1993	RB1	0	1	1	120369	genes	0	9	9	120369	genes	10
1994	RBBP4	0	1	1	16475	genes	0	0	0	0	0	1
1995	RBBP6	0	0	0	0	0	0	1	1	35537	genes	1
1996	RBCK1	0	0	0	0	0	0	1	1	17156	genes	1
1997	RBFOX1	7	0	7	1266555	genes	17	9	26	1266555	genes	33
1998	RBFOX2	0	0	0	0	0	0	1	1	289273	genes	1
[truncated: 8,365 more rows]

## Sheet: TableS7C_genes_DMCs_rg
Table S7C genes harboring differentially methylaed cytosine sites at regulatory regions
genes harbored at least 10 CpG DMCs at promoter, first exon and first intron					genes harbored at least 3 CHG/CHH DMCs at promoter, first exon and first intron
symbol	hyper	hypo	num_dmc		symbol	hyper.chg	hypo.chg	num_dmc.chg	hyper.chh	hypo.chh	num_dmc.chh	num_nCG
AACS	16	1	17		AAR2	0	0	0	1	0	1	1
AAGAB	60	16	76		ABHD4	0	0	0	1	0	1	1
AARSD1	12	1	13		ABI1	0	0	0	1	0	1	1
ABAT	57	6	63		ABI2	1	0	1	2	0	2	3
ABCA12	12	0	12		ABI3	0	0	0	1	0	1	1
ABCA3	34	1	35		ABL1	0	7	7	0	18	18	25
ABCA9	20	20	40		ACACA	0	0	0	0	1	1	1
ABCC1	34	37	71		ACACB	0	0	0	4	0	4	4
ABCC3	13	23	36		ACER3	0	0	0	0	1	1	1
ABCD1	18	0	18		ACO2	0	0	0	0	1	1	1
ABCD3	13	3	16		ACSF2	0	1	1	0	1	1	2
ABCG1	9	2	11		ACTN1	1	0	1	0	0	0	1
ABCG2	30	8	38		ACTN2	0	0	0	0	1	1	1
ABHD11	12	0	12		ACTN4	1	0	1	1	0	1	2
ABHD12	46	14	60		ADAM10	0	0	0	1	0	1	1
ABHD13	12	22	34		ADARB2	1	0	1	1	0	1	2
ABHD14B	32	0	32		ADCY8	0	0	0	0	1	1	1
ABHD16B	18	8	26		ADD1	0	0	0	1	0	1	1
ABHD17A	20	1	21		ADD3	3	0	3	10	1	11	14
ABHD17B	19	8	27		ADGRF1	0	0	0	0	1	1	1
ABHD17C	52	3	55		ADGRG1	0	0	0	0	1	1	1
ABHD2	18	24	42		ADORA1	0	0	0	1	0	1	1
ABHD5	6	20	26		ADPGK	0	0	0	0	1	1	1
ABHD6	18	11	29		ADRA1A	0	0	0	2	0	2	2
ABI1	67	6	73		ADRA1D	1	0	1	0	0	0	1
ABI2	7	18	25		ADSS	0	0	0	0	1	1	1
ABI3	3	9	12		AEBP2	0	0	0	0	1	1	1
ABL1	159	10	169		AFAP1	1	0	1	0	1	1	2
ABL2	41	11	52		AFAP1L2	1	0	1	0	0	0	1
ABO	98	2	100		AFF1	0	0	0	1	0	1	1
ABR	26	25	51		AFF2	0	0	0	2	2	4	4
ABRACL	6	6	12		AFG1L	0	0	0	0	1	1	1
ABRAXAS2	9	2	11		AGO2	0	0	0	1	0	1	1
ACAA2	16	3	19		AGPAT4	1	0	1	0	0	0	1
ACACA	62	1	63		AGPAT5	0	0	0	0	1	1	1
ACACB	37	10	47		AHCYL2	0	0	0	0	9	9	9
ACAD11	11	1	12		AJAP1	0	1	1	0	0	0	1
ACAD8	10	3	13		AK4	1	0	1	0	0	0	1
ACAD9	29	0	29		AKAP7	0	0	0	1	0	1	1
ACADSB	50	0	50		AKR1B1	0	1	1	0	0	0	1
ACAN	33	1	34		AKT3	3	0	3	2	0	2	5
ACAP1	1	30	31		ALAD	0	0	0	0	1	1	1
ACAP2	18	8	26		ALDH3B1	1	0	1	0	0	0	1
ACAP3	48	0	48		ALDH4A1	0	0	0	1	0	1	1
ACAT1	17	2	19		ALG14	0	0	0	1	0	1	1
ACBD3	20	16	36		ALKBH5	1	0	1	0	0	0	1
ACE2	13	0	13		ALX3	0	1	1	0	0	0	1
ACER1	19	2	21		AMBRA1	1	0	1	1	0	1	2
ACER2	3	13	16		AMFR	0	0	0	0	2	2	2
ACER3	25	3	28		AMTN	0	0	0	2	0	2	2
ACKR3	23	1	24		ANAPC5	0	0	0	1	0	1	1
ACLY	21	10	31		ANCV1R	0	0	0	0	1	1	1
ACO1	36	20	56		ANGPT1	0	0	0	0	1	1	1
ACO2	71	15	86		ANKRD13A	1	0	1	3	1	4	5
ACOT11	26	15	41		ANKRD17	0	0	0	0	1	1	1
ACOT13	22	0	22		ANKRD22	0	0	0	2	0	2	2
ACOT7	27	48	75		ANKRD28	0	0	0	0	1	1	1
ACOX2	86	0	86		ANKRD33B	1	0	1	0	1	1	2
ACP1	18	0	18		ANKRD55	0	0	0	0	4	4	4
ACP4	16	0	16		ANKRD61	0	0	0	1	0	1	1
ACP5	11	2	13		ANXA11	0	1	1	0	2	2	3
ACSBG1	30	8	38		ANXA8L1	0	1	1	0	0	0	1
ACSF2	34	13	47		AP3S2	0	0	0	0	1	1	1
ACSL1	198	0	198		AP5Z1	0	1	1	0	1	1	2
ACSL3	45	5	50		APBA2	0	0	0	1	0	1	1
ACSL5	20	29	49		API5	0	0	0	1	0	1	1
ACSL6	42	31	73		APIP	0	0	0	1	0	1	1
ACSS1	45	10	55		APOBEC3H	0	0	0	1	0	1	1
ACSS2	8	2	10		APOO	0	0	0	0	1	1	1
ACSS3	19	8	27		APP	0	0	0	0	3	3	3
ACTA2	21	0	21		APTX	0	0	0	0	1	1	1
ACTG1	14	0	14		AREG	0	1	1	0	1	1	2
ACTN1	191	80	271		ARF1	1	0	1	1	1	2	3
ACTN2	23	2	25		ARFGEF1	0	0	0	0	1	1	1
ACTN4	488	108	596		ARHGAP26	0	0	0	0	4	4	4
ACTR1A	12	0	12		ARHGAP31	0	0	0	1	0	1	1
ACTR2	13	6	19		ARHGEF10L	1	0	1	1	0	1	2
ACTR3	21	7	28		ARHGEF17	1	0	1	0	0	0	1
ACTR8	15	0	15		ARHGEF40	0	0	0	1	0	1	1
ACVR1	13	2	15		ARHGEF5	1	0	1	1	0	1	2
ACVR1C	21	0	21		ARHGEF7	0	0	0	1	2	3	3
ACVR2A	33	3	36		ARL15	0	1	1	1	0	1	2
ACVR2B	46	37	83		ARMC2	0	0	0	0	1	1	1
ACY1	16	0	16		ARMH1	0	0	0	1	0	1	1
ADA	9	9	18		ARNT	1	0	1	0	0	0	1
ADAM10	36	1	37		ARNT2	1	0	1	0	0	0	1
ADAM12	20	0	20		ARRB1	0	0	0	0	1	1	1
ADAM9	12	1	13		ART1	0	0	0	1	0	1	1
ADAMTS14	23	2	25		ASAH1	0	0	0	1	0	1	1
ADAMTS15	22	2	24		ASB17	0	0	0	0	1	1	1
ADAMTS4	15	3	18		ASB5	0	0	0	1	0	1	1
ADAMTS5	9	4	13		ASIC2	1	1	2	4	9	13	15
ADAMTS8	27	5	32		ASPH	0	0	0	1	1	2	2
ADAP1	174	43	217		ATAD1	0	0	0	0	1	1	1
ADARB2	344	34	378		ATF2	0	0	0	1	0	1	1
ADCK2	24	8	32		ATG13	0	0	0	1	0	1	1
ADCK5	16	8	24		ATG14	0	0	0	1	0	1	1
ADCY1	13	0	13		ATP1B3	0	0	0	1	0	1	1
ADCY3	17	6	23		ATP2B1	3	0	3	6	0	6	9
ADCY5	105	25	130		ATP2B4	1	0	1	0	0	0	1
ADCY6	102	0	102		ATP5MF	0	0	0	1	0	1	1
ADCY7	15	51	66		ATP6V1E2	0	1	1	0	0	0	1
ADCY8	43	3	46		ATP8B1	0	1	1	0	1	1	2
ADCY9	148	16	164		ATXN10	0	0	0	1	0	1	1
ADCYAP1R1	18	0	18		AUNIP	0	0	0	0	2	2	2
ADD1	30	4	34		AVP	0	0	0	1	0	1	1
ADD3	71	55	126		AZGP1	0	0	0	3	0	3	3
ADGB	10	0	10		B4GALNT3	1	0	1	4	0	4	5
ADGRB1	73	0	73		B4GALT1	0	0	0	1	0	1	1
ADGRE5	4	25	29		BBOX1	0	0	0	1	0	1	1
ADGRF1	13	0	13		BBS12	0	0	0	1	0	1	1
ADGRF4	13	0	13		BBS2	0	0	0	1	0	1	1
ADGRF5	9	2	11		BCAR3	0	2	2	0	6	6	8
ADGRG1	8	5	13		BCCIP	0	0	0	3	1	4	4
ADGRG5	14	3	17		BCL2	0	0	0	3	0	3	3
ADGRL1	20	10	30		BCL2L13	0	0	0	1	0	1	1
ADGRL2	33	25	58		BCL2L14	0	0	0	1	0	1	1
ADI1	27	0	27		BID	0	1	1	1	0	1	2
ADIG	18	2	20		BIN1	0	1	1	0	0	0	1
ADIPOR1	28	54	82		BLCAP	0	0	0	2	0	2	2
ADIRF	15	0	15		BLK	0	0	0	1	1	2	2
ADK	11	3	14		BMP2K	1	0	1	1	1	2	3
ADM2	15	0	15		BMP7	1	0	1	0	0	0	1
ADNP	62	0	62		BMPR1A	0	0	0	0	1	1	1
ADNP2	18	1	19		BMPR2	0	0	0	0	2	2	2
ADORA1	25	20	45		BNIP3	0	0	0	0	1	1	1
ADORA2B	79	26	105		BPGM	0	0	0	1	0	1	1
ADPGK	36	3	39		BRI3BP	0	0	0	1	0	1	1
ADPRHL1	51	2	53		BRMS1L	0	0	0	0	1	1	1
ADPRS	12	0	12		BSPRY	0	0	0	0	1	1	1
ADRA1A	32	31	63		BTBD11	1	0	1	0	0	0	1
ADRA1B	27	11	38		BTRC	1	0	1	0	1	1	2
ADRA1D	7	3	10		C15H11orf34	0	0	0	0	1	1	1
ADRA2A	55	0	55		C15H11orf58	0	0	0	0	1	1	1
ADRA2B	11	0	11		C16H1orf100	0	0	0	1	2	3	3
ADRB1	12	1	13		C16H1orf105	1	0	1	1	0	1	2
ADSL	26	0	26		C17H4orf45	0	0	0	1	0	1	1
ADSS	12	13	25		C19H17orf78	0	0	0	0	1	1	1
ADSS1	66	0	66		C1GALT1	0	0	0	0	3	3	3
ADTRP	6	21	27		C1H21orf62	2	0	2	4	0	4	6
AEBP2	19	24	43		C1H3orf70	0	0	0	1	0	1	1
AFAP1	77	29	106		C25H7orf26	0	0	0	1	0	1	1
AFAP1L1	9	11	20		C28H1orf198	1	0	1	0	0	0	1
AFAP1L2	113	14	127		C2H2orf76	0	1	1	0	0	0	1
AFF1	50	59	109		C3H1orf141	0	0	0	0	2	2	2
AFF2	63	16	79		C6H4orf19	0	0	0	1	0	1	1
AFF4	18	0	18		C8H9orf85	0	0	0	1	0	1	1
AGA	12	3	15		C9H6orf118	1	0	1	1	0	1	2
AGAP2	33	7	40		CA10	0	0	0	1	1	2	2
AGFG1	10	1	11		CAB39	1	0	1	0	0	0	1
AGFG2	13	18	31		CACNA1E	0	0	0	0	1	1	1
AGL	15	0	15		CACNB2	0	0	0	2	0	2	2
AGO2	313	12	325		CADM1	0	1	1	4	1	5	6
AGO3	11	12	23		CADPS2	0	0	0	0	1	1	1
AGPAT1	16	0	16		CALD1	1	0	1	0	0	0	1
AGPAT2	132	8	140		CALM2	0	0	0	2	0	2	2
AGPAT4	21	15	36		CALN1	0	0	0	2	0	2	2
AGPAT5	13	7	20		CAMK2B	0	0	0	3	0	3	3
AGPS	32	11	43		CAMKV	0	0	0	0	1	1	1
AGR2	13	0	13		CAP1	0	0	0	1	0	1	1
AGT	26	0	26		CAPN13	0	0	0	1	0	1	1
AGTRAP	14	11	25		CARD11	0	0	0	1	3	4	4
AHCY	5	6	11		CARD19	1	0	1	0	0	0	1
AHCYL1	20	6	26		CASP8	0	0	0	2	0	2	2
AHCYL2	77	25	102		CBX2	1	0	1	0	0	0	1
AHDC1	7	6	13		CCDC146	0	0	0	2	0	2	2
AHR	15	12	27		CCDC149	0	1	1	0	1	1	2
AHRR	20	0	20		CCDC183	0	0	0	1	0	1	1
AHSG	13	4	17		CCDC77	0	0	0	1	0	1	1
AIFM2	32	9	41		CCDC90B	0	0	0	1	0	1	1
AIFM3	16	1	17		CCDC92	1	0	1	2	0	2	3
AIG1	19	4	23		CCKAR	0	0	0	1	0	1	1
AIMP2	12	1	13		CCL11	0	0	0	1	0	1	1
AIP	5	14	19		CD247	1	2	3	5	1	6	9
AJAP1	55	4	59		CD300LB	0	0	0	1	0	1	1
AK1	10	0	10		CD81	0	0	0	1	0	1	1
AK2	10	22	32		CD82	0	0	0	1	0	1	1
AK4	13	34	47		CDADC1	0	0	0	0	1	1	1
AKAP10	12	6	18		CDC14B	1	0	1	0	0	0	1
AKAP2	18	1	19		CDCA7L	0	0	0	1	0	1	1
AKAP6	67	6	73		CDH17	2	0	2	5	0	5	7
AKAP8	31	0	31		CDH18	0	0	0	1	0	1	1
AKIRIN1	16	0	16		CDH6	0	1	1	0	0	0	1
AKIRIN2	19	1	20		CDK6	0	0	0	0	1	1	1
AKR7A2	10	1	11		CDS2	0	1	1	2	0	2	3
AKT1	123	11	134		CDYL	0	0	0	1	0	1	1
AKT1S1	19	0	19		CDYL2	0	0	0	0	3	3	3
AKT2	98	0	98		CELA3B	0	0	0	0	1	1	1
AKT3	27	37	64		CELF2	0	0	0	0	2	2	2
AKTIP	21	2	23		CENPI	0	0	0	1	0	1	1
ALAD	22	4	26		CERS3	1	0	1	0	0	0	1
ALCAM	48	18	66		CES5A	0	1	1	0	0	0	1
ALDH18A1	14	2	16		CFH	1	0	1	2	1	3	4
ALDH1A1	17	2	19		CGA	0	0	0	0	1	1	1
ALDH2	19	51	70		CHCHD3	1	0	1	0	0	0	1
ALDH3A2	11	2	13		CHD1	0	0	0	0	1	1	1
ALDH3B1	20	33	53		CHD6	0	0	0	1	4	5	5
ALDH4A1	14	39	53		CHD9	1	1	2	3	0	3	5
ALDH6A1	22	1	23		CHL1	0	0	0	1	0	1	1
ALDH8A1	9	1	10		CHST11	0	0	0	1	1	2	2
ALG1	17	0	17		CHST12	0	0	0	1	0	1	1
ALG12	6	6	12		CHUK	0	0	0	0	1	1	1
ALG14	5	6	11		CIAPIN1	0	1	1	0	0	0	1
ALKBH4	25	1	26		CIBAR1	1	0	1	0	0	0	1
ALKBH5	36	0	36		CILK1	0	0	0	2	0	2	2
ALLC	11	0	11		CLCC1	0	0	0	2	0	2	2
ALOX12E	10	0	10		CLDN10	2	0	2	1	0	1	3
ALOX5	19	16	35		CLDN8	1	0	1	1	0	1	2
ALOX5AP	3	36	39		CLEC12A	0	0	0	1	0	1	1
ALPK2	17	4	21		CLEC12B	0	0	0	1	0	1	1
ALPL	147	58	205		CLEC1B	0	0	0	1	0	1	1
ALS2CL	18	0	18		CLEC5A	0	0	0	0	1	1	1
ALX3	6	6	12		CLIC5	0	0	0	1	1	2	2
ALX4	24	11	35		CLIP4	0	0	0	0	2	2	2
AMBP	15	0	15		CLRN3	0	0	0	2	0	2	2
AMBRA1	110	18	128		CLSTN2	0	0	0	0	1	1	1
AMD1	5	15	20		CLVS1	0	1	1	0	0	0	1
AMDHD2	10	0	10		CLVS2	0	0	0	2	0	2	2
AMFR	3	9	12		CMTM7	0	1	1	0	0	0	1
AMMECR1L	13	14	27		CMYA5	0	0	0	0	1	1	1
AMN1	14	1	15		CNKSR3	1	0	1	0	0	0	1
AMPH	15	6	21		CNNM2	1	2	3	1	4	5	8
AMT	14	0	14		CNNM4	0	1	1	0	0	0	1
ANAPC11	25	0	25		CNOT1	0	0	0	0	1	1	1
ANGPT1	42	23	65		CNOT4	0	0	0	3	0	3	3
ANGPT2	23	22	45		CNR1	1	0	1	1	0	1	2
ANGPT4	10	18	28		CNTN5	0	0	0	0	2	2	2
ANGPTL2	33	4	37		COL26A1	1	0	1	0	0	0	1
ANGPTL4	17	0	17		COL8A1	0	0	0	0	1	1	1
ANK3	9	1	10		COLQ	0	0	0	0	1	1	1
ANKH	132	11	143		COMMD1	0	0	0	1	1	2	2
ANKIB1	8	4	12		COMMD9	1	0	1	0	0	0	1
ANKMY2	14	0	14		COPA	0	1	1	0	0	0	1
ANKRD10	123	6	129		COQ3	0	1	1	1	0	1	2
ANKRD13A	17	32	49		COQ7	0	0	0	0	1	1	1
ANKRD13B	26	8	34		COQ8A	0	0	0	1	0	1	1
ANKRD17	25	6	31		CORO1C	0	0	0	2	0	2	2
ANKRD22	23	3	26		COX5A	0	1	1	0	0	0	1
ANKRD27	33	30	63		CPPED1	1	1	2	1	3	4	6
ANKRD28	1	31	32		CPQ	0	0	0	1	2	3	3
ANKRD33B	72	103	175		CPSF3	0	1	1	3	0	3	4
ANKRD34C	6	5	11		CPT2	0	0	0	1	0	1	1
ANKRD35	9	2	11		CPZ	1	0	1	3	0	3	4
ANKRD46	9	10	19		CRB1	0	0	0	2	1	3	3
ANKRD55	38	13	51		CREBL2	0	0	0	0	1	1	1
ANKRD6	5	13	18		CRX	0	1	1	0	0	0	1
ANKRD9	13	1	14		CRYBB3	1	0	1	1	0	1	2
ANKS4B	22	0	22		CSN1S2	0	0	0	1	0	1	1
ANO1	26	4	30		CSNK1G1	0	0	0	1	1	2	2
ANO3	18	10	28		CSNK1G2	0	0	0	2	0	2	2
ANO4	32	9	41		CSRNP1	0	0	0	0	1	1	1
ANP32A	55	21	76		CSTB	0	0	0	1	0	1	1
ANP32B	6	12	18		CSTF3	0	0	0	0	1	1	1
ANP32E	7	3	10		CTBP2	1	0	1	0	2	2	3
ANTXR1	5	5	10		CTDSPL	1	0	1	1	0	1	2
ANXA10	18	6	24		CTDSPL2	1	0	1	0	0	0	1
ANXA11	40	60	100		CTNNAL1	2	0	2	1	0	1	3
ANXA2	93	0	93		CTNNBL1	0	0	0	0	1	1	1
ANXA3	0	13	13		CUEDC1	0	0	0	1	0	1	1
ANXA4	29	5	34		CUX2	2	2	4	2	2	4	8
ANXA6	5	10	15		CXCL8	0	0	0	0	1	1	1
ANXA9	16	0	16		CYCS	0	0	0	0	1	1	1
AOAH	2	15	17		CYP4B1	0	0	0	1	0	1	1
AOC2	33	0	33		CYRIA	1	0	1	1	0	1	2
AOX1	8	3	11		CYRIB	1	0	1	0	2	2	3
AP1AR	15	4	19		CYSLTR1	0	0	0	1	0	1	1
AP1B1	50	24	74		DAD1	0	0	0	1	0	1	1
AP1G1	20	9	29		DAG1	0	1	1	0	0	0	1
AP1M1	16	1	17		DAZL	0	0	0	1	0	1	1
AP1S1	20	0	20		DCAF6	1	0	1	0	0	0	1
AP1S3	15	8	23		DCAF7	0	0	0	0	1	1	1
AP2A1	33	9	42		DCAF8	0	0	0	0	1	1	1
AP2A2	63	60	123		DDR1	1	0	1	0	0	0	1
AP3B2	14	1	15		DDX10	0	0	0	0	1	1	1
AP3D1	57	8	65		DDX55	1	0	1	0	0	0	1
AP3M1	27	1	28		DEFB6	0	3	3	0	3	3	6
AP3S1	6	19	25		DEPTOR	0	0	0	0	1	1	1
AP4B1	10	0	10		DESI2	0	0	0	1	1	2	2
AP4S1	11	10	21		DET1	2	0	2	0	0	0	2
AP5Z1	86	1	87		DEXI	0	0	0	4	0	4	4
APBA1	13	0	13		DGKB	1	0	1	0	0	0	1
APBA2	42	5	47		DHCR24	0	0	0	0	1	1	1
APBB1IP	26	101	127		DHCR7	0	0	0	1	2	3	3
APBB2	162	12	174		DHRS7B	0	1	1	0	1	1	2
APC	21	8	29		DHRS9	0	1	1	0	0	0	1
APH1B	24	0	24		DHX29	0	0	0	0	1	1	1
API5	12	5	17		DHX37	0	0	0	1	0	1	1
APIP	9	1	10		DHX8	0	0	0	1	0	1	1
APLF	30	0	30		DIABLO	0	0	0	0	1	1	1
APLNR	0	16	16		DIP2C	0	0	0	1	0	1	1
APMAP	24	6	30		DIPK2A	0	0	0	1	0	1	1
APOA1	11	1	12		DISP1	0	1	1	0	1	1	2
APOBEC2	6	4	10		DLGAP1	0	0	0	0	4	4	4
APOC4	8	10	18		DNAAF1	1	0	1	1	0	1	2
APOF	11	8	19		DNAAF11	0	0	0	0	2	2	2
APOL3	16	33	49		DNAJC3	0	0	0	0	1	1	1
APOO	9	1	10		DNAJC30	0	0	0	0	1	1	1
APP	107	7	114		DNAJC7	0	0	0	1	0	1	1
APPL1	13	1	14		DNAL4	0	0	0	1	0	1	1
APPL2	7	9	16		DNM1	0	0	0	1	0	1	1
APRT	39	0	39		DNM3	0	0	0	1	0	1	1
APTX	6	7	13		DNMT3A	1	0	1	0	0	0	1
AQP3	9	1	10		DOCK11	0	0	0	0	1	1	1
AQP9	20	24	44		DPH5	0	0	0	1	0	1	1
ARC	64	0	64		DPP6	0	1	1	2	0	2	3
ARCN1	34	0	34		DPYSL3	0	0	0	1	0	1	1
AREL1	15	9	24		DPYSL5	1	0	1	0	0	0	1
ARF1	123	6	129		DRAM1	0	0	0	0	3	3	3
ARF3	28	2	30		DSCC1	0	0	0	0	1	1	1
ARF4	12	4	16		DSG1	0	0	0	1	0	1	1
ARFGAP3	54	0	54		DSG2	0	0	0	0	1	1	1
ARFGEF1	37	3	40		DTNA	3	0	3	8	1	9	12
ARFGEF2	37	32	69		DUSP23	0	0	0	1	0	1	1
ARFIP1	74	11	85		DUSP4	0	0	0	2	0	2	2
ARGLU1	4	6	10		DYNC1I1	0	2	2	0	0	0	2
ARHGAP1	33	0	33		DYNLRB1	0	0	0	0	1	1	1
ARHGAP10	154	24	178		DYRK1A	0	0	0	2	0	2	2
ARHGAP12	33	13	46		EBD	0	0	0	0	1	1	1
ARHGAP15	3	61	64		ECT2	0	0	0	0	1	1	1
ARHGAP18	64	38	102		EDA	0	0	0	2	0	2	2
ARHGAP24	54	3	57		EDC3	0	0	0	0	1	1	1
ARHGAP25	21	130	151		EDF1	0	0	0	1	0	1	1
ARHGAP26	368	52	420		EEF2KMT	0	0	0	1	1	2	2
ARHGAP27	6	15	21		EEFSEC	0	0	0	0	2	2	2
ARHGAP29	8	4	12		EFNA5	1	0	1	1	1	2	3
ARHGAP30	0	29	29		EFNB3	1	0	1	0	0	0	1
ARHGAP31	33	60	93		EFTUD2	0	0	0	2	0	2	2
ARHGAP32	26	0	26		EHMT1	0	1	1	1	5	6	7
ARHGAP35	23	27	50		EIF2AK1	1	0	1	1	0	1	2
ARHGAP4	3	20	23		EIF3A	0	0	0	1	0	1	1
ARHGAP45	6	22	28		EIF3I	0	0	0	0	1	1	1
ARHGAP6	9	1	10		ELAPOR2	0	0	0	6	1	7	7
ARHGDIA	15	0	15		ELOB	0	0	0	0	1	1	1
ARHGDIB	5	32	37		ELOVL2	0	1	1	0	1	1	2
ARHGEF10L	236	17	253		ELOVL4	2	0	2	0	1	1	3
ARHGEF12	29	9	38		ELOVL7	0	0	0	0	1	1	1
ARHGEF17	69	18	87		ELP3	0	0	0	1	0	1	1
ARHGEF19	31	0	31		EMCN	0	0	0	0	2	2	2
ARHGEF2	5	25	30		ENC1	1	0	1	0	0	0	1
ARHGEF25	18	0	18		ENDOG	0	0	0	0	1	1	1
ARHGEF26	20	0	20		ENPP4	0	0	0	1	0	1	1
ARHGEF28	84	2	86		ENTHD1	0	1	1	0	0	0	1
ARHGEF37	18	6	24		EP400	1	0	1	0	0	0	1
ARHGEF5	10	3	13		EPHB1	1	0	1	0	0	0	1
ARHGEF7	102	47	149		EPS15	0	1	1	0	0	0	1
ARID1A	81	11	92		ERC1	0	1	1	1	1	2	3
ARID5A	12	3	15		ERCC3	0	0	0	0	1	1	1
ARIH1	39	14	53		ERCC5	0	0	0	0	1	1	1
ARL11	0	17	17		ERG	0	3	3	0	1	1	4
ARL14EP	20	5	25		ERGIC1	0	0	0	2	0	2	2
ARL14EPL	10	3	13		ERMARD	0	0	0	1	0	1	1
ARL15	130	34	164		ERP29	0	0	0	1	1	2	2
ARL5A	12	5	17		ETV6	0	0	0	5	4	9	9
ARL6IP1	2	10	12		EVA1C	0	0	0	1	0	1	1
ARL6IP5	9	6	15		EXOC4	0	0	0	2	0	2	2
ARL8B	29	6	35		EXOC7	0	0	0	1	0	1	1
ARMC6	25	4	29		EXOSC10	0	0	0	1	0	1	1
ARMC8	12	6	18		EXT1	0	2	2	8	1	9	11
ARNT	8	6	14		EZR	1	0	1	0	0	0	1
ARNT2	21	5	26		F10	1	0	1	0	0	0	1
ARNTL2	1	9	10		F13A1	0	0	0	0	1	1	1
ARPC1B	1	31	32		F5	0	0	0	0	1	1	1
ARPC5	10	0	10		FAF1	0	1	1	0	1	1	2
ARPC5L	15	0	15		FAM104A	0	1	1	0	0	0	1
ARPIN	12	0	12		FAM163B	0	1	1	0	0	0	1
ARPP21	14	0	14		FAM222A	0	1	1	1	0	1	2
ARRB1	186	69	255		FAM241B	0	0	0	0	1	1	1
ARRDC1	102	12	114		FAM78A	0	0	0	0	1	1	1
ARRDC2	49	0	49		FAM83B	0	1	1	1	0	1	2
ARSA	10	0	10		FAM83D	0	0	0	0	2	2	2
ARSB	6	7	13		FAM83G	0	1	1	0	0	0	1
ARSG	127	42	169		FANCL	0	0	0	1	0	1	1
ARSK	7	7	14		FANK1	0	0	0	0	1	1	1
ART1	5	6	11		FAR1	0	0	0	1	0	1	1
ART3	44	4	48		FARP1	0	0	0	1	0	1	1
ARVCF	7	10	17		FARS2	0	0	0	2	0	2	2
ASAH1	40	2	42		FAT3	0	0	0	0	1	1	1
ASAP1	1	35	36		FBXO11	0	0	0	1	0	1	1
ASAP3	89	17	106		FBXO17	0	0	0	1	1	2	2
ASB1	21	0	21		FBXO39	1	0	1	1	0	1	2
ASB11	15	0	15		FBXW8	0	0	0	0	1	1	1
ASB13	17	5	22		FCGR2A	0	0	0	0	1	1	1
ASB18	44	0	44		FGF14	2	0	2	0	0	0	2
ASB2	30	2	32		FGF7	1	0	1	0	0	0	1
ASB3	14	4	18		FGFR1	0	0	0	1	0	1	1
ASB5	91	2	93		FHIT	0	0	0	1	0	1	1
ASB8	10	0	10		FLACC1	0	0	0	2	0	2	2
ASCC2	5	12	17		FLI1	0	1	1	0	0	0	1
ASCC3	14	1	15		FMNL2	2	0	2	2	3	5	7
ASCL2	19	0	19		FMR1	0	0	0	1	0	1	1
ASF1A	1	11	12		FNDC3A	0	0	0	0	1	1	1
ASF1B	14	6	20		FOXO3	0	0	0	0	1	1	1
ASGR1	24	0	24		FRMD5	0	0	0	1	2	3	3
ASH1L	10	8	18		FRMD6	0	0	0	2	2	4	4
ASIC2	1002	122	1124		FRY	0	0	0	3	0	3	3
ASIC3	60	0	60		FTO	0	1	1	1	1	2	3
ASPG	15	0	15		FUBP3	0	0	0	2	0	2	2
ASPH	23	7	30		FUS	0	0	0	0	1	1	1
ASPHD1	10	0	10		FUT10	0	0	0	0	1	1	1
ASPN	13	1	14		FYN	2	0	2	1	0	1	3
ASS1	9	11	20		GABRA3	0	0	0	0	1	1	1
ASZ1	20	0	20		GABRR2	0	0	0	1	0	1	1
ATAD2	26	0	26		GALNT15	1	0	1	4	0	4	5
ATAD2B	10	5	15		GALNT17	0	0	0	2	1	3	3
ATF2	8	2	10		GALNT2	0	1	1	2	0	2	3
ATF5	10	0	10		GALNT9	2	0	2	0	0	0	2
ATF6B	17	0	17		GALNTL6	1	0	1	1	0	1	2
ATF7	24	1	25		GAN	0	4	4	0	13	13	17
ATF7IP	17	0	17		GAS7	0	0	0	1	0	1	1
ATF7IP2	10	0	10		GATA4	0	0	0	0	1	1	1
ATG101	20	0	20		GATD1	1	0	1	0	0	0	1
ATG13	26	3	29		GBA	1	0	1	0	0	0	1
ATG2B	22	2	24		GCK	0	0	0	1	1	2	2
ATG4B	12	0	12		GDAP2	0	0	0	1	0	1	1
ATG4C	2	8	10		GDF2	0	0	0	0	1	1	1
ATG5	9	4	13		GET1	0	0	0	2	0	2	2
ATL2	35	4	39		GGT1	0	1	1	0	0	0	1
ATL3	20	11	31		GJC1	0	0	0	1	0	1	1
ATMIN	14	4	18		GLB1	0	0	0	2	1	3	3
ATN1	11	0	11		GLRX	0	0	0	1	0	1	1
ATOX1	8	6	14		GLRX5	0	0	0	1	1	2	2
ATP13A1	20	0	20		GLS	0	2	2	0	3	3	5
ATP13A2	20	18	38		GLT1D1	0	0	0	1	0	1	1
ATP1A1	56	6	62		GLTP	0	1	1	0	0	0	1
ATP1A2	9	1	10		GLUD1	0	0	0	0	1	1	1
ATP1B1	35	1	36		GLYAT	0	0	0	1	0	1	1
ATP1B3	4	6	10		GLYATL2	1	0	1	0	0	0	1
ATP23	6	7	13		GMDS	0	1	1	0	1	1	2
ATP2A3	31	21	52		GMFG	0	1	1	0	1	1	2
ATP2B1	18	43	61		GMPR	0	1	1	0	0	0	1
ATP2B2	96	9	105		GMPS	2	2	4	2	1	3	7
ATP2B3	15	0	15		GNA12	0	0	0	0	1	1	1
ATP2B4	64	1	65		GNA14	0	0	0	1	0	1	1
ATP2C1	30	22	52		GNA15	0	0	0	1	0	1	1
ATP4B	14	0	14		GNG12	0	0	0	1	0	1	1
ATP5F1C	18	1	19		GNG2	0	0	0	3	0	3	3
ATP5F1D	6	4	10		GNG4	0	0	0	0	1	1	1
ATP5ME	12	0	12		GNG7	0	1	1	0	2	2	3
ATP5MF	15	1	16		GNGT2	0	0	0	1	0	1	1
ATP5MG	16	1	17		GNPTAB	0	1	1	0	0	0	1
ATP5MJ	6	13	19		GNRHR	0	0	0	1	0	1	1
ATP5MK	8	3	11		GORAB	0	2	2	0	0	0	2
ATP6V0A2	7	3	10		GOSR2	0	0	0	3	0	3	3
ATP6V0B	11	0	11		GPALPP1	2	0	2	1	0	1	3
ATP6V0C	14	5	19		GPC6	1	1	2	5	9	14	16
ATP6V0D1	100	17	117		GPM6A	0	0	0	3	1	4	4
ATP6V0E1	22	3	25		GPR161	0	0	0	1	0	1	1
ATP6V1A	17	11	28		GPR87	0	1	1	0	0	0	1
ATP6V1B1	26	5	31		GPRC5B	1	0	1	2	0	2	3
ATP6V1C1	18	4	22		GPRC5D	0	0	0	0	1	1	1
ATP6V1F	21	0	21		GPT	1	0	1	0	0	0	1
ATP8A1	12	29	41		GRAMD2B	0	1	1	1	0	1	2
ATP8A2	19	4	23		GRIK1	0	0	0	2	2	4	4
ATP8B1	66	9	75		GRIK4	3	2	5	1	1	2	7
ATP8B2	0	19	19		GRIN2B	0	0	0	2	1	3	3
ATPAF2	14	0	14		GRK1	0	0	0	0	1	1	1
ATRN	33	7	40		GRK3	1	0	1	3	1	4	5
ATXN10	46	5	51		GRK5	0	0	0	3	1	4	4
ATXN7L3	9	3	12		GRPR	2	0	2	0	0	0	2
AUH	6	8	14		GRSF1	0	0	0	1	0	1	1
AURKA	7	5	12		GSDMC	0	0	0	1	0	1	1
AVIL	33	8	41		GSG1L	0	2	2	0	2	2	4
AVPI1	28	0	28		GTDC1	0	0	0	2	0	2	2
AXIN1	88	28	116		GTF2IRD1	0	0	0	1	0	1	1
AXIN2	11	2	13		GTF3C4	1	0	1	0	1	1	2
AZGP1	9	2	11		GUK1	0	0	0	0	1	1	1
AZI2	8	5	13		HACE1	0	0	0	0	1	1	1
B3GALNT2	2	8	10		HAPLN2	0	0	0	1	0	1	1
B3GALT2	0	14	14		HCRTR2	0	0	0	0	2	2	2
B3GALT4	11	0	11		HDAC2	1	0	1	0	0	0	1
B3GAT1	19	0	19		HDGFL3	0	0	0	1	0	1	1
B3GAT2	38	13	51		HEATR1	1	0	1	0	0	0	1
B3GNT2	7	68	75		HEATR6	0	0	0	1	0	1	1
B3GNT3	12	46	58		HEBP1	0	0	0	0	2	2	2
B3GNT5	9	30	39		HERC1	0	0	0	3	0	3	3
B4GALNT3	367	8	375		HERC2	0	0	0	0	1	1	1
B4GALT1	268	14	282		HIP1	0	0	0	0	1	1	1
B4GALT6	8	3	11		HMBOX1	0	0	0	0	1	1	1
B4GAT1	26	0	26		HMGN3	0	0	0	3	2	5	5
BAALC	62	10	72		HNF1A	0	0	0	0	2	2	2
BACE1	7	5	12		HOOK3	0	1	1	0	1	1	2
BACE2	28	1	29		HPCAL1	1	0	1	1	1	2	3
BAD	11	0	11		HPCAL4	1	0	1	0	0	0	1
BAG2	24	8	32		HS3ST2	0	0	0	0	1	1	1
BAG3	39	7	46		HS3ST3A1	1	0	1	0	0	0	1
BAG4	26	3	29		HS3ST5	1	0	1	4	5	9	10
BAG5	14	2	16		HS6ST3	0	0	0	5	0	5	5
BAHD1	11	0	11		HSD17B4	0	1	1	0	1	1	2
BAIAP2	182	5	187		HSDL1	1	0	1	2	0	2	3
BANF2	57	0	57		IAPP	0	0	0	1	0	1	1
BANP	136	20	156		IBTK	0	0	0	0	1	1	1
BARX2	67	41	108		ICOS	0	0	0	0	1	1	1
BASP1	30	42	72		IFIT3	0	0	0	1	0	1	1
BATF	1	28	29		IFNAR1	1	0	1	0	0	0	1
BATF3	16	0	16		IFNGR1	0	0	0	1	0	1	1
BAZ1B	45	0	45		IGSF3	0	0	0	0	1	1	1
BAZ2A	26	7	33		IKZF5	0	0	0	2	0	2	2
BAZ2B	23	11	34		IL21R	0	0	0	0	1	1	1
BBLN	14	1	15		IL23R	0	0	0	0	1	1	1
BBS2	5	5	10		IL2RA	1	0	1	1	0	1	2
BCAM	16	0	16		IL31RA	0	0	0	1	0	1	1
BCAR1	83	5	88		IL34	0	1	1	0	0	0	1
BCAR3	85	28	113		INKA2	1	0	1	0	0	0	1
BCAS1	15	3	18		INPP5D	0	0	0	0	1	1	1
BCAS4	2	21	23		INSC	1	0	1	0	0	0	1
BCAT1	16	14	30		IQSEC1	0	0	0	1	0	1	1
BCCIP	12	0	12		IRF6	0	0	0	1	0	1	1
BCKDHA	40	0	40		ITGA5	0	1	1	0	0	0	1
BCKDHB	13	0	13		ITGA6	0	0	0	5	3	8	8
BCL2	595	241	836		ITGB1BP1	0	1	1	3	0	3	4
BCL2A1	13	15	28		ITM2B	0	0	0	0	2	2	2
BCL2L12	19	0	19		ITM2C	1	0	1	0	0	0	1
BCL2L13	57	3	60		JAM2	1	0	1	2	0	2	3
BCL2L15	0	16	16		JOSD1	1	0	1	0	0	0	1
BCL3	16	0	16		JPH3	1	0	1	0	0	0	1
BCL6	11	0	11		KCMF1	0	1	1	1	1	2	3
BCL9L	20	0	20		KCNAB1	3	0	3	1	1	2	5
BCLAF1	19	4	23		KCND2	0	2	2	0	2	2	4
BCNT2	38	4	42		KCND3	0	0	0	1	1	2	2
BCO2	11	3	14		KCNH1	0	0	0	1	0	1	1
BDH1	13	1	14		KCNIP1	1	2	3	2	3	5	8
BDH2	12	0	12		KCNK12	1	0	1	0	0	0	1
BDKRB1	2	9	11		KCNMA1	0	0	0	1	0	1	1
BDKRB2	58	2	60		KCNMB2	0	0	0	3	1	4	4
BDNF	26	2	28		KCTD1	0	0	0	2	0	2	2
BEGAIN	13	0	13		KCTD8	0	0	0	2	1	3	3
BEND5	21	7	28		KDM8	0	0	0	0	1	1	1
BEND6	10	8	18		KHDRBS3	0	0	0	2	0	2	2
BEND7	23	0	23		KLC1	0	0	0	0	1	1	1
BERV-K1	10	9	19		KLHL10	0	1	1	0	2	2	3
BET1L	33	0	33		KLHL14	0	0	0	2	0	2	2
BFAR	31	14	45		KLHL29	0	1	1	0	1	1	2
BFSP2	50	5	55		KLHL42	0	0	0	0	1	1	1
BGLAP	9	1	10		KMO	0	1	1	1	7	8	9
BICD2	55	11	66		KRR1	0	0	0	1	0	1	1
BID	18	21	39		KRT32	0	0	0	0	1	1	1
BIN1	48	35	83		KTN1	0	0	0	1	0	1	1
BIN2	4	98	102		KYNU	0	0	0	1	0	1	1
BIN3	27	10	37		LAMA4	1	0	1	5	1	6	7
BIRC6	16	0	16		LANCL2	0	0	0	1	0	1	1
BLCAP	5	35	40		LAPTM5	0	0	0	2	0	2	2
BLK	40	14	54		LCP1	0	0	0	1	0	1	1
BLNK	14	35	49		LEP	0	1	1	0	0	0	1
BLOC1S4	3	7	10		LHPP	0	2	2	0	4	4	6
BMERB1	43	1	44		LILRA4	0	1	1	0	0	0	1
BMF	19	0	19		LIMD1	0	0	0	1	0	1	1
BMP2K	15	41	56		LIPC	0	0	0	1	1	2	2
BMP3	9	3	12		LIPM	0	0	0	1	0	1	1
BMP5	27	4	31		LIPT2	0	0	0	2	0	2	2
BMP7	23	20	43		LITAF	1	0	1	0	0	0	1
BMP8A	27	4	31		LIX1	1	0	1	0	0	0	1
BMPR1A	21	3	24		LMO1	0	0	0	1	0	1	1
BMPR2	31	21	52		LOC100125776	0	0	0	0	1	1	1
BNIP3	10	0	10		LOC100126053	0	0	0	1	0	1	1
BNIP3L	12	24	36		LOC508916	0	1	1	0	0	0	1
BNIPL	14	0	14		LOC512486	0	0	0	0	1	1	1
BOLA-DMA	2	9	11		LOC517016	0	0	0	1	0	1	1
BOLA-DMB	2	12	14		LOC788142	0	0	0	1	0	1	1
BOLA-DOA	1	10	11		LOXL2	0	0	0	0	1	1	1
BOLA-DOB	0	15	15		LPAR1	0	0	0	0	1	1	1
BOLA-DRB3	0	18	18		LPAR6	0	0	0	0	1	1	1
BORCS6	11	0	11		LRFN4	0	1	1	0	0	0	1
BPHL	18	6	24		LRIG2	0	0	0	1	0	1	1
BPIFB2	42	0	42		LRRC17	0	0	0	0	1	1	1
BPIFB6	10	0	10		LRRC2	1	0	1	0	0	0	1
BPIFC	6	4	10		LRRC42	0	0	0	1	0	1	1
BRD3	111	29	140		LRRC59	0	0	0	0	1	1	1
BRI3BP	14	15	29		LRRC71	0	0	0	0	1	1	1
BRINP1	50	43	93		LRRC8D	0	0	0	0	2	2	2
BRK1	11	1	12		LSM14A	0	0	0	2	0	2	2
BRMS1	34	16	50		LURAP1L	0	0	0	1	0	1	1
BSCL2	15	0	15		LUZP2	0	0	0	5	2	7	7
BSG	32	2	34		LY9	0	0	0	1	0	1	1
BSND	11	0	11		LYPLAL1	0	0	0	0	1	1	1
BSP5	6	4	10		LYRM4	0	2	2	5	0	5	7
BSPRY	17	0	17		LYVE1	0	0	0	1	0	1	1
BTBD1	13	0	13		M-SAA3.2	0	0	0	1	0	1	1
BTBD11	129	30	159		MACROH2A2	1	0	1	0	0	0	1
BTBD19	19	4	23		MAFF	0	0	0	1	0	1	1
BTBD9	15	4	19		MAFK	0	0	0	1	0	1	1
BTC	13	3	16		MAGEH1	0	0	0	1	0	1	1
BTD	34	11	45		MAGI3	0	0	0	1	0	1	1
BTNL2	21	0	21		MAIP1	0	0	0	0	1	1	1
BTRC	28	9	37		MAK16	1	0	1	0	0	0	1
BZW2	35	4	39		MAML2	0	0	0	2	0	2	2
C10H14orf93	25	4	29		MAN1A2	0	0	0	0	1	1	1
C11H2orf42	8	9	17		MAN2A1	0	0	0	4	0	4	4
C11H9orf116	11	0	11		MAP2K6	1	0	1	3	1	4	5
C11H9orf78	21	0	21		MAP3K5	0	1	1	0	0	0	1
C12H13orf46	16	1	17		MAPK1	1	0	1	1	0	1	2
C13H20orf27	10	7	17		MAPKAP1	0	0	0	0	1	1	1
C14H8orf34	14	2	16		MAPKAPK5	0	0	0	1	0	1	1
C15H11orf49	39	10	49		MAPRE2	0	0	0	0	1	1	1
C15H11orf58	11	2	13		MAPT	1	1	2	1	0	1	3
C15H11orf91	9	1	10		MARCHF3	0	0	0	3	0	3	3
C16H1orf100	5	12	17		MARCHF6	1	0	1	0	0	0	1
C16H1orf105	15	7	22		MARK1	0	0	0	1	0	1	1
C16H1orf115	28	6	34		MATN2	0	0	0	0	1	1	1
C16H1orf116	34	0	34		MB21D2	0	0	0	1	0	1	1
C16H1orf158	11	1	12		MBD1	0	0	0	1	0	1	1
C16H1orf21	28	17	45		MDGA1	0	0	0	0	1	1	1
C16H1orf74	17	0	17		MDM4	0	0	0	0	1	1	1
C17H22orf31	16	1	17		ME1	0	0	0	0	1	1	1
C17H4orf45	11	2	13		ME2	0	0	0	0	1	1	1
C18H16orf86	32	0	32		MED12L	0	1	1	0	0	0	1
C18H16orf87	11	0	11		MED28	0	1	1	0	0	0	1
C18H19orf12	5	14	19		MEF2D	0	0	0	1	0	1	1
C18H19orf33	19	0	19		MEGF10	0	2	2	0	8	8	10
C18H19orf47	25	4	29		METAP2	0	0	0	1	0	1	1
C18H19orf54	8	5	13		METTL13	0	0	0	0	1	1	1
C19H17orf98	10	0	10		METTL14	0	0	0	1	0	1	1
C1GALT1	29	1	30		METTL17	0	0	0	1	0	1	1
C1H21orf62	16	3	19		METTL24	0	0	0	1	3	4	4
C1H3orf38	12	0	12		MGAT5	0	1	1	0	0	0	1
C1H3orf70	32	37	69		MGC134040	0	0	0	0	1	1	1
C1QL1	13	0	13		MGC137055	0	0	0	1	0	1	1
C1QTNF1	14	0	14		MGC151921	0	0	0	1	0	1	1
C1QTNF7	72	26	98		MGRN1	0	0	0	1	0	1	1
C1QTNF9	2	8	10		MGST1	0	0	0	0	1	1	1
C21H14orf132	51	5	56		MGST3	0	1	1	0	0	0	1
C21H14orf180	16	0	16		MICALL2	0	0	0	1	0	1	1
C23H6orf136	11	0	11		MICU3	0	0	0	0	2	2	2
C23H6orf141	13	1	14		MIEF1	0	0	0	2	0	2	2
C23H6orf47	11	0	11		MIR10165	1	0	1	0	0	0	1
C24H18orf25	10	4	14		MIR10166	0	0	0	1	0	1	1
C25H16orf54	2	22	24		MIR103-1	0	0	0	2	0	2	2
C25H16orf91	40	0	40		MIR11985	1	0	1	0	0	0	1
C25H7orf50	28	10	38		MIR12033	0	0	0	1	0	1	1
C25H7orf61	28	0	28		MIR1301	1	0	1	0	0	0	1
C28H10orf53	15	0	15		MIR194B-2	0	1	1	0	0	0	1
C28H1orf198	42	2	44		MIR2284J	0	0	0	1	0	1	1
C29H11orf24	17	6	23		MIR2284S	0	1	1	0	0	0	1
C29H11orf54	3	8	11		MIR2285AE	0	0	0	2	0	2	2
C29H11orf98	10	0	10		MIR2285C	0	0	0	0	1	1	1
C2CD2	65	1	66		MIR2285K-1	1	0	1	0	0	0	1
C2H2orf76	23	7	30		MIR2314	1	0	1	0	0	0	1
C2H2orf88	4	9	13		MIR2331	0	1	1	0	0	0	1
C3	17	0	17		MIR2360	0	0	0	1	0	1	1
C3AR1	2	8	10		MIR2406	1	0	1	0	0	0	1
C3H1orf141	14	0	14		MIR29D	0	0	0	1	0	1	1
C3H1orf210	20	0	20		MIR29E	0	0	0	1	0	1	1
C3H1orf226	11	4	15		MIR338	0	1	1	0	0	0	1
C3H1orf56	11	0	11		MIR6530	1	0	1	0	0	0	1
C5AR1	49	27	76		MIR6534	1	0	1	0	0	0	1
C5AR2	34	3	37		MIRLET7A-2	0	1	1	0	0	0	1
C5H12orf57	11	3	14		MLPH	0	0	0	1	0	1	1
C5H12orf75	10	10	20		MMD2	2	0	2	4	0	4	6
C6H4orf19	149	12	161		MME	0	0	0	0	1	1	1
C7	4	7	11		MMP16	0	0	0	1	2	3	3
C7H19orf71	8	2	10		MNAT1	0	0	0	1	0	1	1
C7H1orf35	14	0	14		MOB2	0	0	0	1	0	1	1
C8A	10	0	10		MOB3B	1	0	1	0	0	0	1
C8B	14	0	14		MORN3	0	0	0	1	0	1	1
C8G	13	0	13		MPC1	0	0	0	1	0	1	1
C8H9orf3	24	0	24		MPZL1	0	2	2	0	5	5	7
C8H9orf43	9	2	11		MRFAP1L1	0	0	0	0	1	1	1
C8H9orf85	20	2	22		MRM2	0	0	0	0	1	1	1
C9	29	3	32		MROH1	1	0	1	0	0	0	1
C9H6orf118	20	0	20		MRPL27	0	0	0	0	1	1	1
C9H6orf120	10	0	10		MRPS25	2	0	2	5	0	5	7
CA10	43	4	47		MRPS6	0	0	0	1	0	1	1
CA5A	14	44	58		MSANTD3	1	0	1	0	0	0	1
CA6	26	4	30		MT1E	0	1	1	0	0	0	1
CAB39	21	31	52		MTDH	0	0	0	0	1	1	1
CABCOCO1	13	0	13		MTFR1L	0	0	0	0	1	1	1
CABP1	16	5	21		MTHFD2L	0	0	0	1	1	2	2
CABYR	36	0	36		MTMR3	0	0	0	3	2	5	5
CACFD1	17	3	20		MTUS1	2	0	2	1	0	1	3
CACNA1A	31	0	31		MYBPHL	2	0	2	0	0	0	2
CACNA1E	17	5	22		MYH9	1	0	1	0	0	0	1
CACNA1G	16	0	16		MYLIP	1	0	1	0	0	0	1
CACNA2D1	40	8	48		MYO1D	2	0	2	2	0	2	4
CACNB2	81	34	115		MYRFL	1	0	1	0	0	0	1
CACNG1	12	1	13		N4BP1	0	0	0	0	2	2	2
CACNG2	94	13	107		NAB1	0	0	0	1	0	1	1
CACNG3	41	14	55		NACC2	0	1	1	0	3	3	4
CACNG5	26	0	26		NALF1	0	1	1	1	0	1	2
CACYBP	23	0	23		NAP1L4	0	1	1	0	0	0	1
CADM1	318	73	391		NARS2	0	0	0	1	0	1	1
CADM3	17	7	24		NAV3	0	0	0	3	0	3	3
CADPS	37	3	40		NCK1	0	1	1	1	0	1	2
CADPS2	58	12	70		NDUFAF2	0	0	0	0	1	1	1
CALB2	18	1	19		NEGR1	0	1	1	0	2	2	3
CALCB	11	0	11		NEIL3	0	0	0	0	1	1	1
CALCRL	26	8	34		NEK6	0	0	0	1	0	1	1
CALD1	66	14	80		NENF	1	0	1	0	0	0	1
CALHM3	11	1	12		NEU3	0	0	0	1	0	1	1
CALM2	21	2	23		NEURL1	1	0	1	0	0	0	1
CALM3	77	0	77		NINJ2	1	0	1	5	1	6	7
CALML5	10	0	10		NIPSNAP1	0	0	0	1	0	1	1
CALN1	38	3	41		NIPSNAP2	0	0	0	1	0	1	1
CALU	15	0	15		NKAIN2	0	0	0	0	2	2	2
CAMK1	10	0	10		NLGN1	1	0	1	0	0	0	1
CAMK1G	9	5	14		NLK	0	0	0	0	1	1	1
CAMK2A	19	8	27		NME7	0	0	0	3	0	3	3
CAMK2B	40	14	54		NOL11	1	1	2	0	0	0	2
CAMKK1	47	1	48		NOP56	0	0	0	1	0	1	1
CAMSAP1	45	2	47		NOS1AP	2	0	2	3	0	3	5
CAMSAP3	14	0	14		NOX1	0	0	0	1	0	1	1
CAND1	19	0	19		NR3C2	0	0	0	1	0	1	1
CANX	9	12	21		NRDE2	1	0	1	1	0	1	2
CAP1	30	1	31		NRF1	1	0	1	1	0	1	2
CAP2	10	10	20		NRG1	0	1	1	0	1	1	2
CAPG	25	21	46		NRG3	0	1	1	0	2	2	3
CAPN13	15	1	16		NSF	0	0	0	2	0	2	2
CAPN14	17	2	19		NSUN4	0	0	0	1	1	2	2
CAPN2	11	5	16		NTF3	1	0	1	0	0	0	1
CAPN3	28	25	53		NTN1	0	1	1	0	0	0	1
CAPRIN1	28	0	28		NTNG1	0	1	1	0	0	0	1
CAPS	19	0	19		NTNG2	0	0	0	1	0	1	1
CAPZA1	23	2	25		NTPCR	0	0	0	0	2	2	2
CAPZA2	15	9	24		NUDT21	0	0	0	2	0	2	2
CAPZB	210	119	329		NUFIP1	1	0	1	1	0	1	2
CARD11	153	65	218		NUP50	0	0	0	1	0	1	1
CARD19	7	7	14		NUS1	0	1	1	0	0	0	1
CARD9	0	13	13		NXN	0	0	0	2	0	2	2
CARMIL1	19	0	19		NXPH2	1	0	1	1	2	3	4
CARS1	68	3	71		NXPH3	0	1	1	0	0	0	1
CASKIN2	49	0	49		ODAM	0	0	0	1	0	1	1
CASP2	16	2	18		OLFM1	0	1	1	0	1	1	2
CASP3	11	11	22		OPCML	2	0	2	3	2	5	7
CASP6	50	0	50		ORAI1	2	0	2	0	0	0	2
CASP8	9	1	10		ORC4	0	0	0	1	1	2	2
CASQ2	11	3	14		OSBP2	0	0	0	0	2	2	2
CASR	20	8	28		OSBPL3	0	0	0	4	1	5	5
CAST	23	1	24		OTOP3	0	1	1	0	0	0	1
CASTOR1	43	0	43		OTUD7A	0	0	0	0	1	1	1
CAT	26	11	37		OVOL1	1	0	1	1	0	1	2
CBLC	6	12	18		OXTR	0	0	0	1	1	2	2
CBLL1	7	4	11		P2RX7	0	0	0	0	2	2	2
CBR3	17	0	17		P2RY12	0	1	1	0	0	0	1
CBS	4	7	11		P3H2	1	0	1	0	0	0	1
CBX1	28	1	29		P4HA3	0	0	0	1	1	2	2
CBX5	60	3	63		PACS1	0	1	1	0	0	0	1
CBY2	10	0	10		PACSIN2	0	1	1	0	1	1	2
CC2D1A	11	0	11		PADI1	0	1	1	0	0	0	1
CCDC102A	15	6	21		PADI2	0	0	0	0	1	1	1
CCDC106	38	0	38		PAK4	0	0	0	0	1	1	1
CCDC112	10	0	10		PALM2	3	1	4	5	4	9	13
CCDC12	121	141	262		PAPOLG	0	0	0	0	1	1	1
CCDC124	14	1	15		PAPSS2	0	3	3	0	4	4	7
CCDC127	12	0	12		PARVB	1	0	1	6	0	6	7
CCDC141	4	7	11		PBX4	0	0	0	0	2	2	2
CCDC146	29	12	41		PC	0	0	0	1	5	6	6
CCDC149	22	1	23		PCBP3	0	0	0	1	0	1	1
CCDC157	20	0	20		PCGF5	1	3	4	2	0	2	6
CCDC167	4	46	50		PCTP	0	0	0	1	0	1	1
CCDC174	9	3	12		PDE6H	0	0	0	1	0	1	1
CCDC183	16	2	18		PDE8A	0	0	0	2	1	3	3
CCDC190	10	0	10		PDGFD	0	0	0	1	0	1	1
CCDC43	15	0	15		PDIA5	0	0	0	1	0	1	1
CCDC50	9	6	15		PDLIM5	0	0	0	1	0	1	1
CCDC59	13	0	13		PDXDC1	0	0	0	1	0	1	1
CCDC69	10	24	34		PDXK	1	0	1	0	0	0	1
CCDC77	5	5	10		PEF1	0	0	0	1	0	1	1
CCDC86	12	2	14		PES1	0	1	1	0	0	0	1
CCDC88B	7	4	11		PF4	0	0	0	0	1	1	1
CCDC91	30	9	39		PFDN2	0	0	0	1	0	1	1
CCDC92	90	33	123		PFKFB3	1	0	1	1	0	1	2
CCDC96	36	0	36		PFKP	0	0	0	0	2	2	2
CCHCR1	13	0	13		PFN3	0	0	0	1	0	1	1
CCIN	16	6	22		PGD	0	0	0	1	0	1	1
CCL2	10	0	10		PGM2L1	0	1	1	0	0	0	1
CCL28	36	0	36		PGS1	0	1	1	0	0	0	1
CCL3	0	33	33		PHF11	0	0	0	1	0	1	1
CCN5	18	0	18		PHRF1	1	0	1	2	0	2	3
CCNG1	19	0	19		PHYHIPL	0	0	0	0	1	1	1
CCNI	12	2	14		PIGC	1	0	1	0	0	0	1
CCNJ	11	0	11		PIGR	1	0	1	0	0	0	1
CCNT1	9	1	10		PIK3CB	0	0	0	1	0	1	1
CCR1	2	12	14		PIK3R1	1	1	2	0	0	0	2
CCR4	30	6	36		PIK3R3	0	0	0	1	0	1	1
CCR6	0	27	27		PINK1	0	0	0	1	0	1	1
CCR7	19	17	36		PIP4K2B	0	0	0	0	1	1	1
CCR9	11	12	23		PIP4K2C	0	0	0	0	1	1	1
CCRL2	4	6	10		PITPNM2	0	1	1	2	3	5	6
CCS	22	0	22		PIWIL3	0	0	0	0	1	1	1
CCSER1	14	20	34		PJA2	0	0	0	0	1	1	1
CCT7	25	0	25		PKDCC	0	0	0	1	0	1	1
CD101	1	14	15		PKIA	0	0	0	1	1	2	2
CD151	0	30	30		PKN2	0	1	1	0	3	3	4
CD177	0	11	11		PLA2G1B	0	1	1	0	0	0	1
CD200	14	0	14		PLA2G4A	0	1	1	0	0	0	1
CD200R1L	12	13	25		PLA2R1	0	1	1	0	0	0	1
CD244	57	15	72		PLAT	0	0	0	1	0	1	1
CD247	136	67	203		PLCB1	0	0	0	1	0	1	1
CD2AP	35	3	38		PLCB4	1	1	2	0	0	0	2
CD300A	12	30	42		PLCL1	0	0	0	0	5	5	5
CD300LB	6	4	10		PLCL2	1	0	1	4	2	6	7
CD34	1	69	70		PLD5	3	0	3	5	0	5	8
CD36	14	1	15		PLD6	1	0	1	0	0	0	1
CD38	27	11	38		PLEKHA2	0	1	1	0	0	0	1
CD3D	20	0	20		PLLP	0	0	0	1	0	1	1
CD3G	23	0	23		PLOD1	0	0	0	0	1	1	1
CD44	41	38	79		PLOD2	0	0	0	2	0	2	2
CD47	37	7	44		PLPP1	0	0	0	1	0	1	1
CD48	10	17	27		PLPP7	0	0	0	0	1	1	1
CD5	9	10	19		PLSCR2	0	0	0	0	1	1	1
CD53	18	20	38		PLXNA2	0	1	1	0	0	0	1
CD59	62	8	70		PMEPA1	1	0	1	0	0	0	1
CD7	32	0	32		PMP2	0	0	0	0	1	1	1
CD74	0	10	10		POLG2	1	0	1	0	0	0	1
CD79A	1	29	30		POLI	0	0	0	1	0	1	1
CD80	8	4	12		POU2F1	0	0	0	0	1	1	1
CD81	164	2	166		POU6F2	1	0	1	3	0	3	4
CD82	83	95	178		PPAPDC1A	0	0	0	0	1	1	1
CD86	3	26	29		PPIE	0	0	0	1	0	1	1
CD9	126	9	135		PPM1H	1	0	1	0	0	0	1
CD99	3	54	57		PPOX	0	0	0	1	0	1	1
CD99L2	17	6	23		PPP1CA	0	0	0	0	1	1	1
CDA	11	8	19		PPP1R14A	1	0	1	0	0	0	1
CDC14B	30	11	41		PPP1R35	0	0	0	0	1	1	1
CDC25B	13	0	13		PPP1R37	0	0	0	1	0	1	1
CDC34	29	0	29		PPP2R5A	0	0	0	0	2	2	2
CDC37	8	5	13		PPT1	0	2	2	0	0	0	2
CDC42BPA	14	6	20		PRDM10	0	0	0	1	0	1	1
CDC42BPG	96	0	96		PRDX5	0	1	1	0	0	0	1
CDC42EP1	41	0	41		PREP	0	0	0	0	1	1	1
CDC42EP2	9	1	10		PRG3	0	0	0	1	0	1	1
CDC42EP3	18	35	53		PRKAR1A	1	0	1	0	0	0	1
CDC42EP4	20	2	22		PRKCB	0	0	0	2	0	2	2
CDC42SE1	20	0	20		PRKCH	0	1	1	0	3	3	4
CDC42SE2	36	15	51		PROKR1	0	0	0	0	3	3	3
CDC73	9	1	10		PRRX1	1	1	2	0	2	2	4
CDCA5	10	0	10		PRSS12	0	0	0	1	0	1	1
CDCA7	2	10	12		PRSS35	1	0	1	0	0	0	1
CDCA7L	44	8	52		PSAP	0	0	0	1	0	1	1
CDH10	10	4	14		PSEN2	0	0	0	1	0	1	1
CDH13	189	27	216		PSMA5	0	0	0	1	0	1	1
CDH15	7	4	11		PSMD9	1	0	1	0	0	0	1
CDH16	12	0	12		PSTPIP1	1	2	3	0	3	3	6
CDH17	4	14	18		PTAFR	1	0	1	0	0	0	1
CDH18	25	6	31		PTK2B	0	0	0	2	0	2	2
CDH2	32	8	40		PTPN22	0	1	1	0	0	0	1
CDH20	11	8	19		PTPRG	0	0	0	0	1	1	1
CDH22	16	0	16		PTPRK	0	1	1	0	4	4	5
CDH23	11	1	12		PTPRU	0	0	0	1	0	1	1
CDH6	35	8	43		PUDP	0	0	0	1	0	1	1
CDH7	10	2	12		PXK	0	0	0	1	0	1	1
CDH8	16	6	22		PYCARD	0	0	0	0	2	2	2
CDH9	14	1	15		PYGB	0	0	0	1	0	1	1
CDHR5	10	0	10		PYROXD1	0	0	0	1	0	1	1
CDIP1	67	1	68		QRFP	0	0	0	1	0	1	1
CDK14	3	13	16		RAB15	0	0	0	3	0	3	3
CDK19	26	7	33		RAB20	0	0	0	1	0	1	1
CDK2AP1	20	0	20		RAB27B	0	0	0	0	1	1	1
CDK5RAP2	17	2	19		RAB2A	0	0	0	0	1	1	1
CDK6	56	32	88		RAB37	2	0	2	2	0	2	4
CDKL1	13	0	13		RAB39A	0	1	1	0	0	0	1
CDKN1A	19	0	19		RAB6A	1	0	1	4	0	4	5
CDNF	14	7	21		RAB6B	0	1	1	0	1	1	2
CDPF1	30	0	30		RAB8B	0	3	3	1	4	5	8
CDR2	9	7	16		RAD52	0	0	0	0	2	2	2
CDR2L	12	2	14		RADIL	0	0	0	1	0	1	1
CDRT4	48	2	50		RALGPS2	0	0	0	0	1	1	1
CDS2	60	24	84		RAP1A	0	0	0	0	2	2	2
CDX1	19	1	20		RAP1B	0	0	0	1	0	1	1
CDYL	167	58	225		RAP1GAP	0	0	0	0	1	1	1
CDYL2	32	42	74		RAPGEF2	0	0	0	1	0	1	1
CEACAM19	26	0	26		RARA	0	0	0	0	1	1	1
CEBPE	0	28	28		RASA3	0	0	0	3	0	3	3
CEBPG	31	3	34		RASGEF1C	0	2	2	0	8	8	10
CEL	18	0	18		RAX2	0	0	0	1	0	1	1
CELA2A	1	10	11		RBBP4	0	0	0	0	1	1	1
CELF1	96	28	124		RBCK1	0	0	0	0	1	1	1
CELF2	192	92	284		RBFOX1	3	0	3	8	6	14	17
CELF4	76	10	86		RBFOX2	0	0	0	0	1	1	1
CELSR2	29	0	29		RBFOX3	1	1	2	0	3	3	5
CEMIP2	17	5	22		RBM17	0	0	0	1	0	1	1
CEND1	11	1	12		RBM19	1	0	1	0	0	0	1
CEP131	9	3	12		RBM20	6	4	10	9	8	17	27
CEP162	11	5	16		RBP3	1	0	1	0	0	0	1
CEP170	14	20	34		RCAN2	0	0	0	1	0	1	1
CEP20	5	11	16		RCAN3	0	0	0	1	1	2	2
CEP41	7	3	10		RCL1	0	1	1	0	2	2	3
CEP57L1	23	8	31		RCOR3	0	1	1	0	0	0	1
CEPT1	14	2	16		REEP1	0	0	0	0	1	1	1
CERS2	11	7	18		RELN	0	0	0	1	0	1	1
CERS3	27	0	27		RET	0	1	1	0	0	0	1
CERS4	19	2	21		RHBDL2	0	1	1	0	0	0	1
CERS5	14	2	16		RHNO1	0	1	1	0	0	0	1
CERS6	38	21	59		RHOG	0	0	0	1	0	1	1
CES2	11	0	11		RHOH	0	0	0	1	0	1	1
CFAP126	12	6	18		RIC3	0	0	0	1	0	1	1
CFAP20	6	11	17		RNF10	0	1	1	0	4	4	5
CFAP206	1	10	11		RNF111	1	0	1	0	0	0	1
CFAP410	29	2	31		RNF121	0	0	0	1	0	1	1
CFAP45	10	16	26		RNF125	0	0	0	2	0	2	2
CFAP73	28	0	28		RNF130	0	0	0	1	1	2	2
CFD	7	13	20		RNF2	2	0	2	0	0	0	2
CFDP2	12	2	14		RNF220	1	0	1	0	0	0	1
CFH	7	10	17		RO60	0	1	1	0	1	1	2
CFTR	14	2	16		ROBO1	0	0	0	0	1	1	1
CGA	13	0	13		ROMO1	1	0	1	0	0	0	1
CHAC1	10	0	10		RORA	2	1	3	6	6	12	15
CHAD	56	1	57		RORB	1	0	1	1	0	1	2
CHAMP1	15	1	16		RPE	1	0	1	0	0	0	1
CHCHD3	10	6	16		RPS6KA1	0	0	0	2	0	2	2
CHCHD4	100	0	100		RPS6KA2	0	1	1	0	2	2	3
CHCHD6	35	7	42		RPTOR	2	0	2	0	0	0	2
CHD1	11	18	29		RSPH10B	0	0	0	1	0	1	1
CHD1L	8	4	12		RSPO3	0	0	0	1	0	1	1
CHD2	12	0	12		RSRP1	0	0	0	1	0	1	1
CHD6	70	27	97		RTN4	0	0	0	0	1	1	1
CHD8	10	0	10		RUBCNL	0	2	2	0	0	0	2
CHD9	92	66	158		RUFY3	0	0	0	1	0	1	1
CHIC2	10	3	13		SAMD12	0	0	0	0	1	1	1
CHID1	35	2	37		SAMD4A	0	0	0	4	0	4	4
CHL1	19	25	44		SARAF	1	0	1	0	0	0	1
CHMP1A	21	0	21		SART3	0	0	0	1	0	1	1
CHMP2A	20	0	20		SATB2	0	0	0	1	0	1	1
CHMP3	14	0	14		SBF2	2	1	3	1	1	2	5
CHMP4B	48	47	95		SCARB1	5	2	7	12	3	15	22
CHMP4C	35	0	35		SCCPDH	0	1	1	0	0	0	1
CHMP6	8	15	23		SCGB1D	0	0	0	1	0	1	1
CHN2	13	1	14		SCML4	0	1	1	1	0	1	2
CHPF2	0	10	10		SCN4B	0	0	0	1	0	1	1
CHPT1	11	9	20		SDC2	0	0	0	0	2	2	2
CHRDL2	22	0	22		SEC14L3	0	0	0	0	1	1	1
CHRM1	11	0	11		SELENOV	0	0	0	1	0	1	1
CHRM3	15	6	21		SELPLG	1	0	1	0	0	0	1
CHRNA1	19	0	19		SEMA4D	1	0	1	1	1	2	3
CHRNA9	10	0	10		SEPTIN11	1	0	1	0	1	1	2
CHRND	10	0	10		SERINC1	0	0	0	1	0	1	1
CHRNE	21	0	21		SERPINI1	0	0	0	1	0	1	1
CHST11	145	91	236		SESN2	0	0	0	0	2	2	2
CHST12	12	49	61		SETDB1	0	0	0	0	1	1	1
CHST13	17	28	45		SETDB2	0	0	0	1	0	1	1
CHST14	33	0	33		SGCE	0	0	0	1	0	1	1
CHST8	147	1	148		SGMS1	0	0	0	1	0	1	1
CHST9	21	0	21		SGSM3	0	0	0	0	1	1	1
CHSY1	17	31	48		SH3RF2	0	0	0	1	2	3	3
CHTF18	15	0	15		SHISA9	0	1	1	0	1	1	2
CHTF8	12	0	12		SHOC2	2	0	2	0	0	0	2
CHTOP	6	16	22		SIAH1	1	0	1	0	0	0	1
CHURC1	12	1	13		SIAH3	2	2	4	3	2	5	9
CIAO2A	1	17	18		SIRPB1	0	0	0	0	2	2	2
CIAO3	14	0	14		SLC15A4	0	0	0	0	1	1	1
CIBAR1	12	1	13		SLC19A2	0	0	0	2	1	3	3
CIBAR2	0	13	13		SLC1A1	0	0	0	2	0	2	2
CIDEA	45	0	45		SLC20A2	0	0	0	0	1	1	1
CILK1	14	18	32		SLC22A1	0	0	0	1	0	1	1
CINP	23	0	23		SLC22A16	0	0	0	2	0	2	2
CIPC	52	0	52		SLC22A23	0	1	1	0	1	1	2
CISH	19	0	19		SLC24A4	0	0	0	1	0	1	1
CITED4	12	0	12		SLC25A28	0	0	0	0	1	1	1
CKAP5	31	5	36		SLC25A30	0	0	0	1	0	1	1
CKB	4	36	40		SLC25A45	0	0	0	1	0	1	1
CKS2	17	0	17		SLC26A8	0	0	0	0	1	1	1
CLASP1	20	12	32		SLC31A1	0	0	0	1	0	1	1
CLASP2	7	8	15		SLC35B4	2	0	2	0	1	1	3
CLCC1	16	3	19		SLC35E4	0	0	0	1	0	1	1
CLCN2	21	0	21		SLC35G2	1	0	1	0	0	0	1
CLCN3	140	35	175		SLC39A11	0	0	0	0	1	1	1
CLCN6	20	0	20		SLC39A14	0	0	0	3	0	3	3
CLCN7	62	3	65		SLC41A1	0	0	0	0	1	1	1
CLDN10	22	34	56		SLC44A5	0	0	0	1	0	1	1
CLDN11	12	0	12		SLC4A7	0	0	0	1	0	1	1
CLDN19	11	0	11		SLC51A	0	0	0	1	0	1	1
CLDN3	40	0	40		SLC5A1	0	0	0	1	0	1	1
CLDN4	95	0	95		SLC5A12	0	0	0	1	0	1	1
CLDN7	110	0	110		SLC66A1	2	0	2	0	0	0	2
CLDN8	44	0	44		SLC6A2	0	1	1	0	0	0	1
CLEC1A	8	7	15		SLC7A14	0	0	0	2	0	2	2
CLEC3A	17	0	17		SLC7A5	0	0	0	0	1	1	1
CLEC3B	35	1	36		SLC9A1	2	0	2	5	0	5	7
CLEC5A	3	10	13		SLIT3	0	0	0	0	2	2	2
CLIC3	13	15	28		SMAD3	0	0	0	2	0	2	2
CLIC4	31	7	38		SMAP2	1	0	1	0	1	1	2
CLIC5	89	84	173		SMIM8	0	0	0	0	1	1	1
CLINT1	45	4	49		SMOC2	0	0	0	2	1	3	3
CLIP1	65	12	77		SMTNL2	0	1	1	0	1	1	2
CLIP2	31	3	34		SMYD3	0	0	0	2	0	2	2
CLK1	15	0	15		SNRPF	1	0	1	1	0	1	2
CLK3	25	2	27		SNUPN	0	0	0	1	0	1	1
CLK4	9	1	10		SNX18	0	0	0	3	0	3	3
CLMP	42	11	53		SNX2	0	0	0	1	0	1	1
CLN6	11	0	11		SNX24	0	0	0	0	2	2	2
CLNS1A	13	1	14		SNX27	1	0	1	2	0	2	3
CLPTM1	48	0	48		SNX29	0	0	0	0	1	1	1
CLRN1	14	4	18		SNX30	0	1	1	0	3	3	4
CLRN2	13	1	14		SNX33	1	0	1	1	0	1	2
CLRN3	32	2	34		SNX8	1	0	1	1	0	1	2
CLSTN2	160	11	171		SOCS5	0	1	1	5	1	6	7
CLTA	15	0	15		SORBS1	1	0	1	1	0	1	2
CLTB	14	0	14		SORCS1	3	0	3	10	9	19	22
CLTC	20	3	23		SP140L	1	0	1	1	1	2	3
CLU	11	1	12		SPADH1	1	0	1	0	0	0	1
CLVS1	17	1	18		SPADH2	0	0	0	1	0	1	1
CLYBL	55	40	95		SPAG9	0	1	1	0	0	0	1
CMBL	26	5	31		SPCS3	0	0	0	0	1	1	1
CMC1	14	10	24		SPIN1	0	0	0	1	0	1	1
CMC2	16	0	16		SPINT1	1	0	1	0	0	0	1
CMKLR2	28	1	29		SPINT2	1	0	1	0	0	0	1
CMPK1	18	11	29		SPON1	0	0	0	0	1	1	1
CMSS1	110	76	186		SPSB4	0	1	1	0	0	0	1
CMTM3	12	0	12		SPTBN1	1	0	1	0	0	0	1
CMTM4	32	10	42		SPZ1	0	0	0	1	0	1	1
CMTM6	65	6	71		SRD5A3	0	1	1	0	2	2	3
CMTM7	74	75	149		SRGAP3	0	1	1	0	1	1	2
CMTM8	301	41	342		SRSF9	0	0	0	0	1	1	1
CMYA5	12	3	15		SSPN	0	0	0	1	0	1	1
CNBP	104	6	110		ST14	0	0	0	1	1	2	2
CNDP1	5	17	22		ST3GAL3	0	0	0	1	0	1	1
CNDP2	13	4	17		ST7	0	0	0	0	1	1	1
CNGA1	11	1	12		ST8SIA1	0	0	0	1	1	2	2
CNGA3	10	4	14		STAMBPL1	0	0	0	0	1	1	1
CNIH1	12	0	12		STAP1	0	0	0	0	1	1	1
CNIH3	25	10	35		STIM1	3	0	3	8	0	8	11
CNKSR1	17	0	17		STK10	0	0	0	0	1	1	1
CNKSR3	13	6	19		STK33	0	0	0	0	1	1	1
CNN3	58	6	64		STK40	0	0	0	0	1	1	1
CNNM1	12	1	13		STMN4	0	0	0	2	0	2	2
CNNM2	87	14	101		STON1	0	1	1	0	1	1	2
CNNM4	103	12	115		STUM	0	2	2	0	1	1	3
CNOT1	33	3	36		STX11	0	0	0	1	0	1	1
CNOT10	11	2	13		STX3	0	1	1	0	1	1	2
CNOT2	30	3	33		STX7	0	1	1	0	0	0	1
CNOT4	26	32	58		STXBP1	0	0	0	0	2	2	2
CNOT6	10	3	13		SUN3	0	0	0	1	0	1	1
CNOT6L	30	5	35		SVOP	0	0	0	0	2	2	2
CNOT8	6	4	10		SWAP70	0	1	1	1	0	1	2
CNP	22	1	23		SYK	0	0	0	1	0	1	1
CNPY2	12	0	12		SYNE3	0	1	1	0	1	1	2
CNPY4	11	0	11		SYNPO2	0	0	0	0	1	1	1
CNR1	8	8	16		SYNRG	0	1	1	0	0	0	1
CNR2	40	34	74		TAF1C	1	0	1	0	0	0	1
CNRIP1	15	4	19		TAFA4	0	1	1	0	0	0	1
CNST	10	15	25		TANC2	0	0	0	1	0	1	1
CNTFR	14	2	16		TAOK1	0	0	0	0	1	1	1
CNTN1	10	1	11		TAS2R1	1	0	1	0	0	0	1
CNTN5	17	11	28		TASOR	0	0	0	2	0	2	2
CNTN6	20	1	21		TBC1D10A	1	0	1	0	0	0	1
CNTNAP3	12	1	13		TBC1D10C	0	0	0	0	1	1	1
CNTNAP4	79	0	79		TBC1D14	0	0	0	1	0	1	1
COA1	27	7	34		TBC1D21	0	0	0	2	0	2	2
COA5	12	6	18		TBC1D5	2	0	2	8	0	8	10
COA8	35	25	60		TBX15	0	1	1	0	1	1	2
COG1	8	2	10		TBXAS1	0	0	0	0	2	2	2
COG2	14	0	14		TEK	1	0	1	0	0	0	1
COG3	19	3	22		TEPSIN	0	0	0	0	1	1	1
COG7	9	3	12		TESMIN	0	0	0	1	0	1	1
COG8	12	0	12		TEX30	0	0	0	1	0	1	1
COIL	3	8	11		TFPI	0	0	0	0	1	1	1
COL13A1	26	4	30		TG	0	1	1	0	0	0	1
COL18A1	67	1	68		TGFB2	0	0	0	3	0	3	3
COL26A1	77	2	79		TGIF1	0	0	0	1	0	1	1
COL27A1	17	1	18		THBS4	0	0	0	1	0	1	1
COL4A1	51	59	110		THNSL2	0	0	0	0	1	1	1
COL4A3	42	8	50		THSD4	1	2	3	0	0	0	3
COL5A3	12	0	12		THSD7A	0	0	0	0	2	2	2
COL8A1	58	16	74		TIMP2	0	0	0	1	0	1	1
COLEC12	16	0	16		TJP2	0	0	0	1	0	1	1
COLGALT1	11	1	12		TKTL1	0	0	0	0	1	1	1
COLGALT2	51	13	64		TLL1	0	0	0	1	0	1	1
COLQ	32	12	44		TM9SF4	0	0	0	0	1	1	1
COMMD1	17	15	32		TMED2	0	0	0	1	0	1	1
COMMD7	2	17	19		TMEM110	1	0	1	0	0	0	1
COMT	197	10	207		TMEM14C	1	0	1	0	0	0	1
COP1	16	1	17		TMEM150C	0	0	0	1	0	1	1
COPA	8	3	11		TMEM164	0	0	0	1	0	1	1
COPB2	20	1	21		TMEM184B	1	0	1	1	0	1	2
COPE	21	0	21		TMEM185A	0	0	0	2	0	2	2
COPG1	2	10	12		TMEM196	0	0	0	6	0	6	6
COPS9	0	12	12		TMEM214	0	0	0	1	0	1	1
COPZ1	24	9	33		TMEM216	0	0	0	0	1	1	1
COQ2	18	11	29		TMEM253	0	1	1	0	0	0	1
COQ8A	79	4	83		TMEM265	0	0	0	1	0	1	1
CORO1A	0	39	39		TMEM266	0	0	0	0	2	2	2
CORO1C	72	19	91		TMEM30A	0	0	0	0	1	1	1
CORO2A	26	16	42		TMEM50B	1	0	1	2	0	2	3
CORO7	12	24	36		TMEM63C	1	0	1	0	0	0	1
COX11	11	0	11		TMEM92	1	0	1	0	0	0	1
COX14	19	0	19		TMEM97	0	3	3	0	1	1	4
COX19	38	0	38		TMPRSS4	1	0	1	1	0	1	2
COX20	10	0	10		TNFAIP3	0	0	0	1	0	1	1
COX6B2	1	10	11		TNFRSF21	0	0	0	1	0	1	1
COX7B2	13	1	14		TNFSF10	0	0	0	0	1	1	1
COX8B	12	1	13		TNIP1	0	0	0	0	1	1	1
CP	13	1	14		TNS4	1	0	1	0	0	0	1
CPB2	13	3	16		TOM1L2	1	0	1	1	1	2	3
CPE	21	16	37		TP53I11	0	0	0	0	1	1	1
CPEB3	40	4	44		TPRG1	1	0	1	0	0	0	1
CPLX1	11	0	11		TPRN	0	0	0	1	0	1	1
CPN1	4	8	12		TPST2	0	0	0	1	0	1	1
CPN2	12	0	12		TRAF3IP3	0	0	0	1	0	1	1
CPNE2	11	6	17		TRAF5	1	0	1	0	0	0	1
CPNE3	14	8	22		TRAK2	1	0	1	4	0	4	5
CPNE5	19	2	21		TRAPPC10	0	1	1	1	0	1	2
CPPED1	68	5	73		TRH	0	0	0	1	0	1	1
CPQ	39	16	55		TRIM11	0	0	0	1	0	1	1
CPSF4	17	0	17		TRIM2	0	1	1	1	1	2	3
CPSF6	14	1	15		TRIM29	1	0	1	0	0	0	1
CPT1A	57	33	90		TRIM5	1	0	1	1	0	1	2
CPT2	3	9	12		TRIM9	2	0	2	2	0	2	4
CPTP	13	0	13		TRIP4	0	0	0	1	0	1	1
CPXM2	33	0	33		TRMT112	0	1	1	0	0	0	1
CRABP1	0	25	25		TRMT5	0	0	0	1	0	1	1
CRABP2	7	14	21		TSGA10IP	1	0	1	0	0	0	1
CRAMP1	10	9	19		TSNARE1	0	0	0	0	1	1	1
CRAT	28	0	28		TSPAN14	0	0	0	1	0	1	1
CRB1	36	9	45		TSPAN18	1	4	5	6	4	10	15
CRB3	37	0	37		TSPAN3	0	2	2	0	1	1	3
CRBN	19	4	23		TSPEAR	0	0	0	0	1	1	1
CRCP	14	0	14		TSPO	0	0	0	0	1	1	1
CREB3L1	58	2	60		TSPYL1	0	0	0	0	1	1	1
CREB3L2	221	13	234		TTC17	0	0	0	0	1	1	1
CREB5	32	11	43		TTF1	0	0	0	3	1	4	4
CREBBP	127	19	146		TUBGCP2	0	0	0	0	1	1	1
CREBL2	9	10	19		TUFT1	1	0	1	2	0	2	3
CREBZF	10	0	10		TXN	0	0	0	1	0	1	1
CREG1	11	3	14		TXNDC12	0	0	0	1	0	1	1
CREM	10	2	12		UBD	0	0	0	1	0	1	1
CRHR1	45	2	47		UBE2G2	0	0	0	1	0	1	1
CRIM1	125	6	131		UBE2H	0	0	0	0	1	1	1
CRIP2	17	0	17		UBE2K	1	0	1	0	0	0	1
CRIPT	13	0	13		UBL3	0	1	1	0	2	2	3
CRISP3	11	5	16		UBTD2	0	0	0	0	1	1	1
CRISPLD2	102	5	107		UCN3	0	0	0	1	0	1	1
CRK	19	0	19		UGT8	1	0	1	0	0	0	1
CRLF3	4	102	106		UHRF1BP1L	0	0	0	0	1	1	1
CRTC1	135	6	141		UMPS	0	0	0	0	1	1	1
CRTC2	13	2	15		UNC5D	6	1	7	6	2	8	15
CRX	10	2	12		UNC93A	0	0	0	4	0	4	4
CRY1	20	4	24		UNK	0	0	0	1	0	1	1
CRY2	37	1	38		UPB1	0	0	0	2	0	2	2
CRYAB	54	0	54		UQCC1	0	0	0	1	0	1	1
CRYBB2	12	0	12		UROS	0	0	0	1	2	3	3
CRYBB3	13	2	15		USP15	0	0	0	1	0	1	1
CRYBG2	47	0	47		USP2	1	0	1	0	0	0	1
CRYGS	2	17	19		UTRN	0	0	0	3	1	4	4
CRYL1	19	0	19		UTS2R	1	0	1	0	0	0	1
CS	8	7	15		VAPB	0	0	0	0	3	3	3
CSDC2	13	1	14		VHL	0	0	0	1	0	1	1
CSDE1	10	1	11		VOPP1	0	1	1	1	0	1	2
CSE1L	6	8	14		VPS16	0	0	0	1	0	1	1
CSF1	13	0	13		VPS26C	0	0	0	0	1	1	1
CSF2RB	43	4	47		VPS33A	0	0	0	1	0	1	1
CSF3	12	0	12		VPS37A	0	1	1	1	2	3	4
CSK	49	51	100		VPS37B	1	0	1	0	0	0	1
CSN3	11	0	11		VSTM1	0	1	1	0	0	0	1
CSNK1D	19	6	25		VSTM2L	0	0	0	0	2	2	2
CSNK1E	7	3	10		WASF1	0	0	0	1	0	1	1
CSNK1G1	28	5	33		WASF2	0	0	0	1	0	1	1
CSNK1G2	30	18	48		WASF3	1	0	1	1	0	1	2
CSNK1G3	27	7	34		WBP11	0	0	0	1	0	1	1
CSNK2A1	15	4	19		WDFY1	0	0	0	0	1	1	1
CSPG4	44	7	51		WDFY2	2	1	3	2	0	2	5
CSRNP1	32	7	39		WDR3	0	0	0	0	1	1	1
CSRNP2	14	0	14		WDR44	0	0	0	0	1	1	1
CSRNP3	15	1	16		WDR7	1	0	1	0	0	0	1
CSRP1	133	11	144		WDR89	0	0	0	0	1	1	1
CSRP2	55	0	55		WDTC1	0	0	0	1	0	1	1
CSRP3	15	1	16		WIF1	0	0	0	0	1	1	1
CST3	2	10	12		WIPI2	0	0	0	1	0	1	1
CSTA	11	1	12		WLS	0	0	0	1	1	2	2
CSTB	43	1	44		WNT3	0	0	0	1	1	2	2
CSTF3	12	14	26		WWTR1	0	2	2	1	2	3	5
CTBP2	216	15	231		XKR6	1	0	1	0	0	0	1
CTCF	10	3	13		XPC	1	0	1	0	1	1	2
CTDNEP1	17	0	17		XPO4	0	0	0	0	1	1	1
CTDSP2	40	6	46		XRCC2	0	0	0	0	1	1	1
CTDSPL	209	18	227		XRRA1	0	0	0	0	1	1	1
CTDSPL2	20	1	21		XYLT2	0	1	1	0	3	3	4
CTF1	23	0	23		YJU2B	0	0	0	1	0	1	1
CTLA4	0	19	19		YME1L1	0	0	0	0	1	1	1
CTNNA1	29	0	29		YTHDC1	0	0	0	1	0	1	1
CTNNAL1	12	3	15		YTHDF2	0	0	0	1	0	1	1
CTNNB1	45	0	45		ZBTB40	0	0	0	0	1	1	1
CTNNBIP1	10	0	10		ZBTB8OS	0	0	0	0	1	1	1
CTNNBL1	21	7	28		ZCCHC17	1	0	1	0	0	0	1
CTNND1	217	1	218		ZCWPW1	0	0	0	0	1	1	1
CTNS	13	10	23		ZDHHC14	0	0	0	0	1	1	1
CTPS1	26	2	28		ZDHHC3	0	0	0	0	1	1	1
CTSB	45	1	46		ZER1	0	1	1	0	0	0	1
CTSF	0	15	15		ZNF292	0	0	0	0	1	1	1
CTTNBP2NL	15	0	15		ZNF385B	0	0	0	1	0	1	1
CTU1	10	6	16		ZNF423	0	0	0	1	1	2	2
CTU2	1	9	10		ZNF445	2	0	2	0	0	0	2
CUEDC1	343	43	386		ZNF644	0	0	0	3	0	3	3
CUL1	10	18	28		ZNF70	1	0	1	0	0	0	1
CUL3	16	6	22		ZNF774	0	0	0	0	1	1	1
CUX2	266	52	318		ZNF804B	0	0	0	7	2	9	9
CX3CR1	17	26	43		ZNRF1	0	0	0	1	0	1	1
CXADR	58	20	78		ZRANB1	0	0	0	0	1	1	1
CXCL12	12	0	12		ZSCAN2	0	0	0	0	1	1	1
CXCL17	22	3	25
CXCR1	17	0	17
CXCR2	20	8	28
CXCR6	19	1	20
CXXC5	21	1	22
CYB561	21	0	21
CYB561A3	12	2	14
CYB561D1	6	6	12
CYB561D2	12	0	12
CYB5A	81	20	101
CYB5B	16	4	20
CYB5D1	13	2	15
CYB5R3	116	5	121
CYB5RL	9	3	12
CYBA	2	12	14
CYBRD1	13	0	13
CYCS	9	1	10
CYFIP1	11	22	33
CYFIP2	10	0	10
CYGB	15	2	17
CYLD	1	13	14
CYP11A1	16	0	16
CYP27A1	34	8	42
CYP27B1	17	0	17
CYP2C18	14	0	14
CYP2D14	7	9	16
CYP46A1	22	2	24
CYP4B1	11	1	12
CYP51A1	12	0	12
CYP8B1	12	0	12
CYRIA	54	84	138
CYRIB	41	148	189
CYSLTR1	19	0	19
CYSRT1	32	0	32
CYSTM1	8	28	36
CYTH2	12	0	12
CYTH4	13	40	53
CYTIP	6	11	17
DAAM1	96	4	100
DAB2	9	6	15
DAB2IP	18	21	39
DAG1	104	0	104
DAGLA	13	0	13
DAP	6	35	41
DAP3	4	17	21
DAPK3	11	0	11
DAPP1	14	43	57
DAZAP1	84	7	91
DBN1	23	0	23
DBNDD1	8	8	16
DCAF4	12	2	14
DCAF6	22	1	23
DCAF7	38	0	38
DCAF8	22	2	24
DCAKD	49	4	53
DCBLD2	8	18	26
DCLRE1C	12	0	12
DCP1B	0	20	20
DCT	10	0	10
DCTN1	25	13	38
DCUN1D1	26	0	26
DCUN1D3	21	6	27
DDA1	22	0	22
DDAH1	42	7	49
DDO	31	0	31
DDR1	64	0	64
DDR2	10	6	16
DDT	14	0	14
DDX19B	10	2	12
DDX23	6	6	12
DDX31	18	7	25
DDX39A	11	12	23
DDX55	2	15	17
DECR2	12	0	12
DEF6	8	35	43
DEF8	12	0	12
DEFB13	9	31	40
DEFB3	12	1	13
DEFB6	299	28	327
DEFB7	12	1	13
DEGS1	20	1	21
DEGS2	32	4	36
DENND1A	18	8	26
DENND2B	80	16	96
DENND2D	14	3	17
DENND5B	25	23	48
DEPDC7	10	4	14
DEPP1	9	1	10
DEPTOR	33	36	69
DERA	11	18	29
DERL1	20	2	22
DESI2	19	33	52
DEXI	38	12	50
DFFA	19	2	21
DFFB	3	11	14
DGAT1	16	12	28
DGAT2	20	5	25
DGCR2	87	0	87
DGCR6L	13	0	13
DGCR8	36	0	36
DGKA	12	0	12
DGKB	28	10	38
DGKD	104	30	134
DGKZ	148	55	203
DGUOK	6	5	11
DHCR7	24	0	24
DHRS11	33	1	34
DHRS12	62	5	67
DHRS7	7	4	11
DHRS7B	13	5	18
DHRS9	7	16	23
DHTKD1	33	0	33
DHX29	11	5	16
DHX32	44	2	46
DHX34	26	0	26
DHX35	9	10	19
DHX9	9	2	11
DIAPH3	9	7	16
DIO2	29	0	29
DIP2B	87	80	167
DIP2C	95	75	170
DIPK1A	31	6	37
DIPK2A	9	1	10
DIRAS2	27	1	28
DISP1	37	14	51
DKFZP761E198	13	1	14
DKK2	25	6	31
DLC1	126	9	135
DLG4	27	2	29
DLG5	131	22	153
DLGAP1	55	4	59
DLX4	26	1	27
DMTN	12	0	12
DNA2	10	0	10
DNAAF10	7	10	17
DNAAF11	10	1	11
DNAAF9	9	2	11
DNAI1	14	0	14
DNAJA1	16	1	17
DNAJA4	9	1	10
DNAJB1	10	0	10
DNAJB12	23	1	24
DNAJB4	16	7	23
DNAJB5	10	1	11
DNAJB6	96	11	107
DNAJC11	55	1	56
DNAJC12	20	0	20
DNAJC13	2	11	13
DNAJC15	8	4	12
DNAJC17	39	0	39
DNAJC21	10	3	13
DNAJC25	3	25	28
DNAJC3	40	6	46
DNAJC5	24	71	95
DNAJC5B	40	11	51
DNAJC6	23	5	28
DNAJC7	47	3	50
DNAL4	17	1	18
DNASE1L2	20	0	20
DNASE1L3	7	8	15
DNM1	20	21	41
DNM2	72	19	91
DNM3	27	3	30
DNMT1	24	1	25
DNMT3A	101	5	106
DOCK10	39	58	97
DOCK11	15	10	25
DOCK6	8	9	17
DOCK7	12	1	13
DOCK8	38	29	67
DOCK9	58	8	66
DOHH	10	0	10
DOK2	0	25	25
DOK3	0	56	56
DOK4	25	0	25
DOK5	44	4	48
DOLK	44	1	45
DOLPP1	10	0	10
DPCD	7	10	17
DPEP1	27	0	27
DPH1	12	0	12
DPH6	29	0	29
DPM1	24	0	24
DPP10	7	11	18
DPP6	278	61	339
DPYD	11	1	12
DPYS	24	2	26
DPYSL2	12	0	12
DPYSL3	69	8	77
DPYSL4	14	0	14
DPYSL5	42	5	47
DRAM1	9	16	25
DRAM2	11	1	12
DRAP1	38	0	38
DRAXIN	17	5	22
DRC7	4	6	10
DSC2	15	1	16
DSCC1	19	7	26
DSE	20	5	25
DSG2	32	1	33
DSP	121	0	121
DSTN	46	1	47
DSTYK	9	7	16
DTNA	29	55	84
DTNBP1	10	4	14
DTWD2	10	2	12
DTX1	48	3	51
DTX2	62	4	66
DTYMK	18	2	20
DUOXA1	11	3	14
DUS1L	40	0	40
DUSP1	0	15	15
DUSP14	65	0	65
DUSP23	11	0	11
DUSP29	6	10	16
DUSP4	36	4	40
DUSP7	10	0	10
DVL1	45	0	45
DYNC1H1	65	0	65
DYNC1I1	85	0	85
DYNC2I2	18	1	19
DYNLRB1	10	12	22
DYNLT2	12	4	16
DYRK1A	79	27	106
DYRK1B	18	0	18
DYRK3	10	0	10
DYSF	12	18	30
DZIP1	0	11	11
E2F1	12	25	37
E2F3	21	34	55
E2F6	13	0	13
E4F1	15	0	15
EBD	41	43	84
EBPL	39	6	45
ECE1	10	18	28
ECHDC1	22	0	22
ECHDC2	50	2	52
ECHS1	13	3	16
ECI1	17	0	17
ECI2	15	6	21
ECM2	11	0	11
EDA	17	5	22
EDEM3	4	7	11
EDF1	15	0	15
EDN1	44	0	44
EDN2	20	0	20
EDNRB	45	5	50
EED	7	5	12
EEF1A2	10	0	10
EEF1AKMT1	17	0	17
EEF1D	88	0	88
EEF1E1	1	12	13
EEF1G	28	1	29
EEF2	11	1	12
EEF2K	125	6	131
EEF2KMT	22	0	22
EEFSEC	234	33	267
EFCAB1	10	0	10
EFCAB2	7	12	19
EFCAB7	12	0	12
EFHB	9	2	11
EFHC1	12	0	12
EFHD1	158	2	160
EFHD2	65	13	78
EFNA1	11	0	11
EFNA2	23	13	36
EFNA3	15	0	15
EFNA4	35	0	35
EFNA5	277	92	369
EFS	23	0	23
EGFL7	1	16	17
EGFLAM	13	5	18
EGLN1	93	11	104
EGLN2	27	5	32
EGLN3	10	18	28
EHBP1L1	1	9	10
EHD1	32	23	55
EHD3	36	7	43
EHD4	15	3	18
EHF	243	0	243
EHHADH	11	0	11
EHMT1	205	14	219
EIF2AK3	24	5	29
EIF2S2	10	0	10
EIF3A	12	0	12
EIF3B	22	0	22
EIF3H	15	0	15
EIF3K	1	18	19
EIF3L	10	0	10
EIF4B	14	3	17
EIF4E	32	1	33
EIF4E3	4	57	61
EIF4EBP1	99	0	99
EIF4EBP2	57	0	57
EIF4G2	11	0	11
EIF4H	45	1	46
EIPR1	7	31	38
ELANE	0	11	11
ELAPOR2	64	11	75
ELAVL1	16	6	22
ELAVL4	27	0	27
ELF1	70	35	105
ELF2	5	8	13
ELF3	79	0	79
ELF5	66	0	66
ELFN1	16	1	17
ELK3	38	21	59
ELK4	23	1	24
ELL	223	156	379
ELL2	56	0	56
ELMO1	28	3	31
ELMO2	0	15	15
ELMOD1	10	0	10
ELN	30	1	31
ELOA	30	4	34
ELOF1	12	1	13
ELOVL2	42	12	54
ELOVL4	4	6	10
ELOVL5	42	24	66
ELOVL7	6	8	14
ELP6	13	0	13
EMC3	8	18	26
EMC6	10	0	10
EMC8	12	0	12
EMCN	20	8	28
EMG1	7	6	13
EML3	20	0	20
EML5	8	14	22
EML6	18	22	40
EMP2	42	2	44
EMP3	0	10	10
EMX1	0	41	41
ENC1	15	0	15
ENDOD1	25	4	29
ENDOU	13	2	15
ENG	13	23	36
ENO4	11	0	11
ENOPH1	13	3	16
ENPEP	4	8	12
ENPP1	13	8	21
ENPP3	9	3	12
ENPP4	4	7	11
ENTHD1	21	9	30
ENTPD1	36	50	86
ENTPD2	32	0	32
ENTPD4	14	2	16
ENTPD8	3	11	14
ENTR1	10	1	11
EOGT	18	0	18
EP400	12	2	14
EPAS1	55	31	86
EPC1	120	9	129
EPDR1	13	0	13
EPHA1	13	0	13
EPHA2	6	20	26
EPHB1	116	23	139
EPHB2	11	0	11
EPHB3	77	0	77
EPHB4	13	1	14
EPHX1	73	0	73
EPHX2	15	0	15
EPM2A	4	21	25
EPN1	47	0	47
EPN2	151	5	156
EPN3	34	1	35
EPRS	18	0	18
EPS15	18	14	32
EPS15L1	44	28	72
EPS8L3	18	0	18
ERAP1	4	7	11
ERBB2	98	0	98
ERBB3	41	0	41
ERC1	58	8	66
ERC2	12	3	15
ERCC6	19	0	19
ERG	47	222	269
ERGIC1	426	23	449
ERGIC2	8	3	11
ERICH5	11	12	23
ERLEC1	16	1	17
ERLIN2	17	0	17
ERMARD	2	14	16
ERO1A	13	10	23
ERO1B	3	11	14
ERP29	13	8	21
ERP44	12	8	20
ERRFI1	143	1	144
ESAM	7	47	54
ESPNL	32	0	32
ESR1	14	0	14
ESS2	23	0	23
ETF1	29	3	32
ETFA	5	7	12
ETFB	39	4	43
ETFRF1	12	0	12
ETS1	102	28	130
ETS2	25	6	31
ETV6	327	80	407
EVA1C	64	11	75
EVI2A	0	17	17
EVI2B	3	45	48
EVL	4	117	121
EVPL	61	0	61
EWSR1	15	0	15
EXOC4	9	1	10
EXOC6	11	15	26
EXOC6B	24	5	29
EXOC8	58	0	58
EXOSC4	12	2	14
EXT1	280	92	372
EXT2	23	3	26
EXTL3	12	0	12
EYA2	52	2	54
EZH1	7	16	23
EZH2	13	0	13
EZR	321	13	334
F10	32	5	37
F11R	31	2	33
F2R	39	4	43
F2RL1	12	0	12
F2RL2	12	12	24
FA2H	112	1	113
FAAH	6	4	10
FABP3	37	0	37
FABP7	10	0	10
FADD	0	10	10
FADS2	9	31	40
FADS3	4	12	16
FAF1	33	1	34
FAF2	12	16	28
FAH	12	2	14
FAHD1	19	0	19
FAM102A	235	5	240
FAM104A	18	8	26
FAM107B	71	37	108
FAM110A	109	16	125
FAM110B	26	7	33
FAM111B	13	0	13
FAM117A	32	60	92
FAM118B	48	18	66
FAM120A	15	7	22
FAM120B	38	21	59
FAM124B	3	7	10
FAM135B	67	10	77
FAM13A	16	0	16
FAM13C	12	0	12
FAM151B	12	0	12
FAM166B	10	0	10
FAM167A	18	0	18
FAM167B	15	5	20
FAM168A	11	2	13
FAM168B	25	0	25
FAM169A	12	1	13
FAM171A1	49	20	69
FAM171B	13	6	19
FAM174B	66	4	70
FAM174C	14	0	14
FAM183A	10	0	10
FAM193B	24	1	25
FAM20B	31	5	36
FAM214B	6	7	13
FAM221A	11	0	11
FAM222A	15	12	27
FAM229A	17	0	17
FAM234A	6	13	19
FAM241A	43	5	48
FAM78A	1	152	153
FAM78B	67	6	73
FAM83B	11	2	13
FAM83D	9	41	50
FAM83G	42	1	43
FAM89A	6	13	19
FANCA	15	0	15
FANCE	12	0	12
FANCL	9	3	12
FANK1	86	11	97
FAR1	4	16	20
FARP1	217	33	250
FARS2	6	5	11
FARSA	9	1	10
FARSB	14	1	15
FAS	14	7	21
FASN	43	0	43
FASTK	26	1	27
FASTKD5	1	10	11
FAT2	13	1	14
FAT3	72	19	91
FAU	10	0	10
FBH1	1	24	25
FBLN1	42	0	42
FBLN5	11	1	12
FBN1	12	14	26
FBP1	24	0	24
FBXL16	11	0	11
FBXL2	9	12	21
FBXL20	43	10	53
FBXL22	16	4	20
FBXL4	3	9	12
FBXL5	22	1	23
FBXO11	56	4	60
FBXO17	14	4	18
FBXO2	14	3	17
FBXO21	29	0	29
FBXO28	11	0	11
FBXO32	41	0	41
FBXO34	17	5	22
FBXO36	60	7	67
FBXO39	3	11	14
FBXO44	14	0	14
FBXO8	12	0	12
FBXW4	23	3	26
FBXW5	14	0	14
FBXW7	23	0	23
FBXW8	14	13	27
FCER1G	1	41	42
FCGR2A	1	16	17
FCGR2B	37	0	37
FCHO2	15	10	25
FCHSD1	12	0	12
FCRL1	15	3	18
FDFT1	13	3	16
FDXR	13	0	13
FECH	9	5	14
FEM1A	33	0	33
FEM1B	20	3	23
FER	41	3	44
FERMT3	5	30	35
FES	10	5	15
FEZ1	12	2	14
FFAR3	30	4	34
FGD3	10	0	10
FGF1	19	0	19
FGF10	9	2	11
FGF14	203	37	240
FGF2	74	0	74
FGF7	22	6	28
FGF9	15	0	15
FGFBP1	19	0	19
FGFR1	101	6	107
FGFR1OP2	21	0	21
FGFRL1	21	0	21
FGGY	18	2	20
FGR	0	52	52
FHIP1B	16	0	16
FHIT	13	6	19
FHL2	81	12	93
FHL3	2	37	39
FHL5	9	3	12
FHOD1	22	1	23
FHOD3	55	7	62
FIG4	33	19	52
FIGNL2	10	1	11
FILIP1	53	14	67
FKBP3	10	3	13
FKBP5	33	21	54
FKBP9	22	0	22
FKBPL	18	0	18
FKRP	7	5	12
FLACC1	8	8	16
FLCN	31	0	31
FLI1	45	250	295
FLNB	213	17	230
FLOT2	13	1	14
FLT1	9	9	18
FLT3LG	19	0	19
FLVCR1	24	6	30
FMNL2	176	47	223
FMNL3	60	66	126
FMO1	15	7	22
FMO4	33	0	33
FMOD	43	1	44
FN3KRP	12	0	12
FNBP1	44	44	88
FNDC3A	11	1	12
FNDC3B	28	3	31
FNTB	10	4	14
FOLR1	6	5	11
FOSL2	53	9	62
FOXI1	33	1	34
FOXJ1	19	3	22
FOXJ2	46	1	47
FOXN3	162	4	166
FOXN4	29	1	30
FOXO3	202	33	235
FOXP1	24	5	29
FOXP2	16	12	28
FOXP4	38	3	41
FRG1	8	6	14
FRMD4A	78	8	86
FRMD4B	20	0	20
FRMD5	140	34	174
FRMD6	60	8	68
FRRS1	16	1	17
FRY	49	19	68
FSCN1	17	3	20
FSCN2	17	0	17
FSHR	37	1	38
FSTL3	20	0	20
FSTL5	48	3	51
FTH1	12	0	12
FTO	121	37	158
FUBP1	15	0	15
FUBP3	14	0	14
FURIN	45	0	45
FUT7	0	36	36
FUT9	24	3	27
FXR1	17	2	19
FXYD1	20	8	28
FXYD2	8	3	11
FXYD3	14	1	15
FXYD6	90	1	91
FYB1	36	27	63
FYN	29	18	47
FZD1	79	0	79
FZD10	1	31	32
FZD7	77	0	77
FZR1	75	2	77
G3BP1	17	2	19
G3BP2	13	1	14
G6PC3	1	10	11
GAB1	162	95	257
GAB3	3	23	26
GABARAP	12	0	12
GABPA	9	2	11
GABPB1	12	6	18
GABRB1	55	5	60
GABRP	16	0	16
GABRR2	28	0	28
GABRR3	20	0	20
GADL1	23	9	32
GAK	60	1	61
GAL3ST1	40	1	41
GAL3ST3	24	0	24
GALC	8	15	23
GALE	31	0	31
GALK2	13	4	17
GALM	11	4	15
GALNS	12	0	12
GALNT13	15	0	15
GALNT14	117	11	128
GALNT15	19	10	29
GALNT16	52	16	68
GALNT17	106	20	126
GALNT18	88	5	93
GALNT2	84	65	149
GALNT4	30	0	30
GALNT5	22	1	23
GALNT6	15	13	28
GALNT9	32	9	41
GALNTL6	139	13	152
GAMT	11	0	11
GAN	65	15	80
GANAB	18	1	19
GAPT	0	22	22
GAPVD1	20	13	33
GARNL3	15	2	17
GARRE1	32	3	35
GAS2L1	22	0	22
GAS2L2	40	0	40
GAS7	164	117	281
GAT	41	1	42
GATA3	99	0	99
GATA4	26	2	28
GATAD2A	100	15	115
GATD1	22	4	26
GBA	31	12	43
GBA3	6	4	10
GBE1	6	15	21
GBF1	22	3	25
GCC1	20	3	23
GCHFR	17	0	17
GCK	79	0	79
GCLC	85	14	99
GDA	29	19	48
GDAP2	10	4	14
GDE1	5	19	24
GDF15	18	0	18
GDF5	11	0	11
GDF6	1	11	12
GDF7	49	3	52
GDI2	24	1	25
GDNF	21	21	42
GDPD3	43	0	43
GDPD5	60	8	68
GET1	11	2	13
GET4	131	0	131
GFAP	16	0	16
GFER	12	0	12
GFI1B	6	63	69
GFM2	16	2	18
GFOD2	5	20	25
GFPT1	31	1	32
GFRA2	16	3	19
GGA1	16	12	28
GGA3	13	27	40
GGCX	15	0	15
GGT5	1	109	110
GGT6	19	0	19
GGTA1	4	28	32
GHR	86	10	96
GID4	14	5	19
GID8	15	0	15
GIGYF1	11	0	11
GIGYF2	21	2	23
GIMAP7	24	0	24
GINM1	31	0	31
GIPC2	52	1	53
GIT2	4	17	21
GJA5	14	3	17
GJB2	10	2	12
GJB5	15	0	15
GJC1	27	10	37
GJC2	18	12	30
GJC3	13	0	13
GK	10	2	12
GLB1	17	12	29
GLB1L	8	7	15
GLI2	101	9	110
GLIPR1	0	18	18
GLIPR2	34	4	38
GLOD4	3	13	16
GLRA1	22	1	23
GLRX	16	15	31
GLRX3	10	2	12
GLRX5	49	3	52
GLS	2	45	47
GLS2	15	2	17
GLT1D1	10	8	18
GLT6D1	1	11	12
GLT8D2	27	2	29
GLTP	60	23	83
GLYAT	34	1	35
GLYCAM1	25	0	25
GM2A	5	5	10
GMDS	184	203	387
GMFB	11	2	13
GMIP	6	5	11
GML	9	1	10
GMPR	6	9	15
GMPS	15	16	31
GNA11	37	7	44
GNA12	145	35	180
GNA14	50	25	75
GNA15	10	49	59
GNAI1	38	14	52
GNAI2	39	32	71
GNAI3	16	6	22
GNAQ	144	42	186
GNAS	24	11	35
GNAT3	6	4	10
GNB1	293	13	306
GNB1L	50	3	53
GNG11	5	5	10
GNG12	67	61	128
GNG2	15	6	21
GNG3	21	0	21
GNG4	26	2	28
GNG7	28	89	117
GNGT2	2	8	10
GNPAT	5	5	10
GNPTAB	116	20	136
GNPTG	15	0	15
GNS	12	5	17
GOLGA2	10	11	21
GOLGA4	21	3	24
GOLGA7B	21	2	23
GOLIM4	56	13	69
GOLM1	15	1	16
GOLM2	24	17	41
GOLPH3	68	7	75
GOLPH3L	22	4	26
GOLT1A	14	16	30
GOPC	13	4	17
GORASP1	22	7	29
GORASP2	15	5	20
GOSR2	14	5	19
GOT1	10	3	13
GOT2	21	0	21
GP2	16	0	16
GPA33	26	3	29
GPAM	18	0	18
GPAT3	16	3	19
GPAT4	102	18	120
GPATCH2	8	6	14
GPBP1	44	9	53
GPC4	36	4	40
GPC5	15	4	19
GPC6	70	28	98
GPD1	21	0	21
GPD1L	26	8	34
GPD2	16	37	53
GPI	17	0	17
GPLD1	5	9	14
GPM6A	112	6	118
GPN2	11	0	11
GPR107	11	7	18
GPR137	15	0	15
GPR137B	16	38	54
GPR139	25	3	28
GPR146	151	19	170
GPR161	16	4	20
GPR171	11	1	12
GPR176	20	1	21
GPR179	15	0	15
GPR183	21	2	23
GPR19	14	3	17
GPR37	45	0	45
GPR37L1	86	0	86
GPR39	115	39	154
GPR4	0	51	51
GPR65	24	3	27
[truncated: 3,702 more rows]

## Sheet: TableS7D_FunctionEnrich_CpGDMCs
Table S7D Functional enrichment for genes harboring at least ten CpG-DMCs at their promtoer, first exon and first intron
	Category	ID	Description	GeneRatio	BgRatio	pvalue	p.adjust	qvalue	Count	geneID	Functional enrichment for genes harboring at least three CHG/CHH-DMCs at their promtoer, first exon and first intron
GO:0006629	BP	GO:0006629	lipid metabolic process	185/1702	334/3822	1.99721e-05	0.0325409	0.029235	185	ABHD12/ABHD2/ABHD6/ACAA2/ACACA/ACAD8/ACADSB/ACAT1/ACLY/ACSS3/ADRA2A/AGPAT1/AGPAT4/AGT/AKT1/ALDH1A1/ALDH3B1/ANGPTL4/AOX1/ARSA/ASAH1/ATP6V1B1/B4GALT1/BCKDHB/BDH1/BDH2/BSCL2/C3/CD81/CDS2/CERS2/CHPT1/COMT/COQ2/CPT2/CRABP1/CREBL2/CRYL1/CTDNEP1/CYB5R3/CYP11A1/CYP51A1/DEGS1/DGAT1/DGAT2/DGKA/DHCR7/DHRS11/DHRS9/DIO2/DOLK/DPM1/ECHS1/EDN1/EDN2/EDNRB/EEF1A2/ELOVL5/ELOVL7/ERLIN2/ESR1/ETFA/ETFB/FADS2/FADS3/FAH…
GO:0030036	BP	GO:0030036	actin cytoskeleton organization	73/1702	116/3822	3.97247e-05	0.0325409	0.029235	73	ACTA2/ACTG1/ACTN1/ACTR2/ACTR3/ARF1/ARFGEF1/ARHGDIB/ARPC1B/ARPC5/ARPC5L/ARPIN/ASB2/ATP2C1/BAIAP2/CAP1/CAPN3/CAPZB/CDC42EP2/CLDN3/CNN3/CORO1A/CORO7/CSF3/CTNNA1/CXADR/CYRIA/CYRIB/DMTN/DSTN/DTNBP1/EDN1/EMP2/EZR/FSCN2/GMFB/GSN/ITGB1BP1/KCTD13/KIT/KRT19/LPAR1/MEF2A/MICAL1/MSRB1/MTPN/MYH10/PACSIN1/PAK1/PDLIM4/PDXP/PHACTR4/PIK3R2/PRKAR1A/RASA1/RDX/RHOA/RHOC/RHPN2/ROCK2/S100A10/S1PR1/SCIN/SLC9A3R1/STRIP1/…
GO:0051056	BP	GO:0051056	regulation of small GTPase mediated signal transduction	24/1702	30/3822	7.39862e-05	0.0325409	0.029235	24	ARFGEF1/ARHGDIB/CDC42SE1/CDC42SE2/CYRIB/CYTH2/DLC1/F2R/F2RL1/FBP1/FBXO8/FLCN/GABARAP/KCTD13/LPAR1/MAPKAP1/MAPRE2/PSD/RASA1/RASA3/RIPOR2/SGSM3/SHOC2/TGM2
GO:0000165	BP	GO:0000165	MAPK cascade	76/1702	124/3822	0.000101432	0.0325409	0.029235	76	ADRA1A/ADRA2A/AGT/APIP/ARL6IP5/AVPI1/BCAR3/CCL2/CCL3/CD36/CD81/CTNNB1/CXCL17/CYLD/DNAJA1/DSTYK/EDN1/EFNA1/ERP29/F2R/F2RL1/FAM83D/FBXW7/FGF1/FGF2/FLCN/GPR183/HMGCR/HSF1/HYAL2/IGF1R/IGFBP3/IL18/IL34/ITGB1BP1/JCAD/LAMTOR1/LPAR1/MAP2K6/MAPK1/MAPK13/MAPK7/MEF2A/MEF2C/NENF/NLK/NOD2/PAK1/PLCB1/PRDX2/PRKCA/PSEN1/RAF1/RAP1A/RAPGEF2/RELL1/RIPK2/SH3RF1/SLC9A3R1/SMAD1/SOD1/SPRY1/SPRY2/SPRY4/STK38/STK40/SYNJ2…
GO:0035556	BP	GO:0035556	intracellular signal transduction	230/1702	434/3822	0.000105448	0.0325409	0.029235	230	ABR/ADCY7/ADGRL1/ADORA2B/ADRA1A/ADRA2A/AGT/AKT1/APIP/ARFGEF1/ARHGAP29/ARHGDIA/ARHGDIB/ARL6IP5/ASB11/ASB2/ASB3/ASB8/ATP2B4/ATP2C1/AVPI1/BATF/BCAR3/CAPN3/CASP6/CASTOR1/CCL2/CCL3/CD36/CD81/CDC42SE1/CDC42SE2/CDIP1/CISH/CLU/COA8/CSF3/CTNNB1/CXCL17/CYLD/CYRIB/CYTH2/DEF8/DLC1/DMTN/DNA2/DNAJA1/DNMT1/DSTYK/EDA/EDN1/EDN2/EDNRB/EFNA1/EIF4EBP1/ERO1A/ERP29/ESR1/F2R/F2RL1/FADD/FAM83D/FBP1/FBXL2/FBXO8/FBXW7/FGF…
GO:0007166	BP	GO:0007166	cell surface receptor signaling pathway	200/1702	372/3822	0.000106083	0.0325409	0.029235	200	ACVR1/ACVR2A/ADAM10/ADCYAP1R1/ADGRE5/ADGRL1/ADGRL2/ADORA2B/ADRA2A/AGT/ANXA4/ARHGDIA/ARRB1/BCAR3/C3/CALCRL/CCL2/CCL3/CCR7/CCRL2/CD36/CD44/CD79A/CD81/CDC37/CDH6/CDIP1/CFD/CHRND/CHRNE/CIBAR1/CNTN1/COL4A1/CORO1A/CPE/CSNK1D/CSNK2A1/CTDNEP1/CTNNB1/CTNNBIP1/CX3CR1/CXCR1/CYLD/DMTN/DSTYK/EDA/EDN1/EDN2/EDNRB/EFNA1/ELAPOR2/ELF1/EXT1/EYA2/F2R/FADD/FAS/FBXW7/FCER1G/FERMT3/FGF1/FGF2/FLCN/FUT7/FYN/G3BP1/GABARAP…
GO:0003018	BP	GO:0003018	vascular process in circulatory system	28/1702	37/3822	0.000110251	0.0325409	0.029235	28	ABCC1/ACTA2/ADORA2B/ADRA2A/AGT/ATG5/CTNNBIP1/DDAH1/EDN1/EDN2/EDNRB/EXT1/F2R/F2RL1/GPR4/HRH1/ITGB1BP1/KCNMA1/P2RY2/PDE2A/PRKG1/RHOA/SCNN1B/SLC1A1/SLC2A1/SNTA1/SOD1/VAMP2
GO:0007264	BP	GO:0007264	small GTPase mediated signal transduction	44/1702	65/3822	0.00012345	0.0325409	0.029235	44	ARFGEF1/ARHGDIA/ARHGDIB/BCAR3/CDC42SE1/CDC42SE2/CYRIB/CYTH2/DLC1/DNMT1/F2R/F2RL1/FBP1/FBXO8/FLCN/GABARAP/GDI2/KCTD13/LPAR1/MAPKAP1/MAPRE2/PHACTR4/PSD/RAB15/RAB21/RAB30/RAB4A/RAP1A/RAP1B/RAPGEF2/RASA1/RASA3/RASGEF1B/RASGRP2/RHOA/RHOC/RHOH/RHOT1/RIPOR2/RND1/SGSM3/SHOC2/TGM2/VAV1
GO:0016192	BP	GO:0016192	vesicle-mediated transport	160/1702	291/3822	0.000126914	0.0325409	0.029235	160	ACTG1/ADORA2B/ADRA2A/AGT/ANXA2/ANXA6/AP2A2/AP3S1/ARCN1/ARF1/ARF3/ARL8B/ARRB1/ATG5/ATP2C1/BACE1/C3/CALCRL/CCL3/CD36/CD5/CD81/CD9/CDC42SE1/CDC42SE2/CLTC/CLU/CNIH1/COG7/COLEC12/COPA/COPB2/COPE/COPG1/COPZ1/CORO1A/CORO7/CSK/CTNNB1/CYBA/DMTN/DNAJC6/DNM1/DNM2/DPYSL2/DYSF/EHD1/ELMO2/EMP2/EXOC8/FCER1G/FHIP1B/GAPVD1/GHR/GRK2/GRK3/HOOK3/INSIG1/ITGAL/ITGB1/ITGB2/KDELR2/KIT/LAMP1/LAMTOR1/LAPTM4B/LDLR/LGALS3BP…
GO:0032879	BP	GO:0032879	regulation of localization	226/1702	427/3822	0.000135741	0.0325409	0.029235	226	ABHD2/ABHD6/ACAA2/ACTG1/ACTN1/ADAM10/ADORA2B/ADRA2A/AGT/AKT1/ANXA2/ANXA6/ARF1/ARL6IP5/ARPIN/ARRB1/ATG5/ATP1A1/ATP1B3/ATP2B4/ATP2C1/BACE1/C3/CAPN3/CCL2/CCL3/CCT7/CD81/CD9/CD99L2/CELA2A/CFAP20/CFAP206/CLDN3/CLDN4/CLIC4/CLIC5/CLTC/CLU/CNPY4/COA8/CORO1A/CPSF6/CRBN/CREBL2/CRIPT/CRYAB/CSK/CTNNA1/CTNNB1/CXCL17/CYBA/CYRIB/DHX9/DMTN/DNAJA1/DNM1/DTNBP1/EDN1/EDN2/EFNA1/EHD1/EMP2/ENTR1/ERO1A/ERP29/F2R/F2RL1/…
GO:0030029	BP	GO:0030029	actin filament-based process	76/1702	125/3822	0.00014773	0.0325409	0.029235	76	ACTA2/ACTG1/ACTN1/ACTR2/ACTR3/ARF1/ARFGEF1/ARHGDIB/ARPC1B/ARPC5/ARPC5L/ARPIN/ASB2/ATP2C1/BAIAP2/CAP1/CAPN3/CAPZB/CDC42EP2/CLDN3/CNN3/CORO1A/CORO7/CSF3/CTNNA1/CXADR/CYRIA/CYRIB/DMTN/DSTN/DTNBP1/EDN1/EMP2/EPDR1/EZR/FSCN2/GMFB/GSN/ITGB1BP1/KCNJ2/KCTD13/KIT/KRT19/LPAR1/MEF2A/MICAL1/MSRB1/MTPN/MYH10/PACSIN1/PAK1/PDLIM4/PDXP/PHACTR4/PIK3R2/PRKAR1A/RASA1/RDX/RHOA/RHOC/RHPN2/ROCK2/S100A10/S1PR1/SCIN/SLC9…
GO:0010927	BP	GO:0010927	cellular component assembly involved in morphogenesis	15/1702	17/3822	0.000241602	0.0422318	0.0379414	15	ACTA2/ACTG1/ACTN1/CAPN3/CD9/EDN1/KRT19/MEF2A/MTMR2/PRKAR1A/RFX2/TBC1D20/TBPL1/TCAP/TPPP
GO:0023051	BP	GO:0023051	regulation of signaling	258/1702	498/3822	0.000285232	0.0427698	0.0384247	258	ABHD6/ACAA2/ACTN1/ACVR2A/ADAM10/ADORA2B/ADRA1A/ADRA2A/AGT/AKT1/ANXA2/APIP/ARF1/ARFGEF1/ARHGDIB/ARL6IP5/ARRB1/ATP2B4/ATP2C1/AVPI1/BACE1/BCAR3/C3/CAPN3/CASTOR1/CCL2/CCL3/CD36/CD81/CDC37/CDC42SE1/CDC42SE2/CDH2/CELA2A/CIBAR1/CISH/CLU/CSF3/CSNK2A1/CTDNEP1/CTNNB1/CTNNBIP1/CXCL17/CYBA/CYLD/CYRIB/CYTH2/DLC1/DMTN/DNAJA1/DNM1/DSTYK/DTNBP1/EDA/EDN1/EFNA1/ELAPOR2/ELF1/ERP29/ESR1/F2R/F2RL1/FADD/FAM83D/FBP1/FB…
GO:0006820	BP	GO:0006820	anion transport	48/1702	74/3822	0.000300077	0.0427698	0.0384247	48	ABCC1/ABCG2/ARL6IP5/CFTR/CLCC1/CLCN7/CLDN4/CLIC5/CPTP/CTNS/GLTP/LRRC8C/NOS2/PACC1/PLA2G3/PLA2R1/PLEKHA8/PROCA1/PSEN1/PTGES/RAB11B/SFXN1/SLC15A4/SLC16A1/SLC1A1/SLC1A4/SLC25A21/SLC25A25/SLC25A29/SLC25A6/SLC26A11/SLC26A8/SLC2A1/SLC34A2/SLC37A2/SLC38A7/SLC39A14/SLC43A2/SLC44A4/SLC46A1/SLC4A4/SLC51B/SLC6A17/SLC9A1/SLC9A3R1/TTYH1/VDAC1/VDAC3
GO:0090066	BP	GO:0090066	regulation of anatomical structure size	48/1702	74/3822	0.000300077	0.0427698	0.0384247	48	ACTA2/ADORA2B/ADRA2A/AGT/ARFGEF1/ARPC1B/ARPC5/ARPC5L/ATG5/CORO1A/CSF3/CYRIA/CYRIB/DMTN/DNM2/DPYSL2/DSTN/EDN1/EDN2/EDNRB/EXT1/F2R/F2RL1/HP1BP3/HRH1/ITGB1BP1/KCNMA1/MSN/MTPN/P2RY2/PDXP/PIK3R2/PRKG1/RAB5A/RASA1/RDX/RHOA/SCIN/SCNN1B/SLC6A4/SLC9A3R1/SNTA1/SOD1/SPART/TMOD1/TMOD4/VAMP2/VAV1
GO:0010646	BP	GO:0010646	regulation of cell communication	256/1702	495/3822	0.000349427	0.0441678	0.0396807	256	ABHD6/ACAA2/ACTN1/ACVR2A/ADAM10/ADORA2B/ADRA1A/ADRA2A/AGT/AKT1/APIP/ARF1/ARFGEF1/ARHGDIB/ARL6IP5/ARRB1/ATP2B4/ATP2C1/AVPI1/BACE1/BCAR3/C3/CAPN3/CASTOR1/CCL2/CCL3/CD36/CD81/CDC37/CDC42SE1/CDC42SE2/CDH2/CELA2A/CIBAR1/CISH/CLU/CSF3/CSNK2A1/CTDNEP1/CTNNB1/CTNNBIP1/CXCL17/CYBA/CYLD/CYRIB/CYTH2/DLC1/DMTN/DNAJA1/DNM1/DSTYK/DTNBP1/EDA/EDN1/EFNA1/ELAPOR2/ELF1/ERP29/ESR1/F2R/F2RL1/FADD/FAM83D/FBP1/FBXL2/FB…
GO:0045055	BP	GO:0045055	regulated exocytosis	30/1702	42/3822	0.000359926	0.0441678	0.0396807	30	ADORA2B/ADRA2A/AGT/ARL8B/BACE1/CCL3/CORO1A/DMTN/KIT/LAMP1/MICAL1/PLA2G3/PSEN1/PTGDS/RAB11B/RAB15/RAB5A/RAC2/RAP1A/S100A12/S100A13/SCAMP5/SCIN/STX1A/SYNGR2/SYNGR3/SYT1/TMED10/TMEM79/VAMP2
GO:0003008	BP	GO:0003008	system process	121/1702	217/3822	0.000411306	0.0441678	0.0396807	121	ABCC1/ABCG2/ACTA2/ADORA2B/ADRA1A/ADRA2A/AGT/ANXA6/APP/AQP3/ARL6IP5/ASB2/ATG5/ATP2B4/ATP6V1B1/CCL2/CCL3/CD36/CHRM3/CHRND/CHRNE/CLDN4/CLIC5/CNGA1/CTNNBIP1/CXADR/DDAH1/DRAM2/EDN1/EDN2/EDNRB/EMP2/EXT1/F2R/F2RL1/FBXO32/FYN/GJB2/GLRX3/GNAS/GPR37L1/GPR4/GRAP/GRK2/GTF2IRD2/HEXA/HMGCR/HOMER1/HOPX/HRH1/HYAL2/ID2/IFT20/IGFBP5/ITGB1BP1/KCNJ2/KCNMA1/KIT/LDLR/LGMN/LMCD1/LPCAT3/MAP2K6/MC1R/MEF2A/MEF2C/MTG1/MTMR…
GO:0030335	BP	GO:0030335	positive regulation of cell migration	54/1702	86/3822	0.00043585	0.0441678	0.0396807	54	ACTG1/ADAM10/ADRA2A/AGT/CCL3/CD99L2/CLDN3/CLDN4/CORO1A/CXCL17/DMTN/EDN1/EDN2/F2R/F2RL1/FADD/FERMT3/FGF1/FGF2/FGFBP1/FUT7/GATA3/GRB7/HSPB1/IGFBP5/IL34/ITGB1/ITGB1BP1/JCAD/LYVE1/MAPK1/MAPRE2/MET/MIEN1/MSTN/P2RX4/PAK1/PLCG1/PRKCA/RAB25/RAC2/RAPGEF2/RDX/RHOA/RHOC/RIPOR2/SPRY2/STK4/TEK/TGFB2/TGFBR1/TMEM102/TRIP6/VEGFA
GO:0097746	BP	GO:0097746	blood vessel diameter maintenance	21/1702	27/3822	0.000437485	0.0441678	0.0396807	21	ACTA2/ADORA2B/ADRA2A/AGT/ATG5/EDN1/EDN2/EDNRB/EXT1/F2R/F2RL1/HRH1/ITGB1BP1/KCNMA1/P2RY2/PRKG1/RHOA/SCNN1B/SNTA1/SOD1/VAMP2
GO:0030054	CC	GO:0030054	cell junction	174/1779	290/4051	8.29113e-09	3.10917e-06	2.48734e-06	174	ABHD17A/ABHD17C/ABHD6/ABR/ACTG1/ACTN1/ACTN4/ADA/ADAM10/ADGRL1/ADORA2B/ADRA2A/ALDH1A1/ANXA6/AQP3/ARF1/ARL14EP/ARL8B/ARPC5L/B4GALT1/BACE1/BASP1/BCAR3/CACNB2/CAPRIN1/CD53/CD99L2/CDH2/CHRM3/CHRND/CHRNE/CLDN3/CLDN4/CLIC4/CORO1A/CRIPT/CSK/CTBP2/CTNNB1/CXADR/CYFIP1/DAG1/DLC1/DNAJC5/DNAJC6/DNM1/DNM2/DSTYK/DTNBP1/EEF1A2/EGFLAM/EIF3B/EXT1/F2R/FBXO2/FLCN/FXYD1/FYN/GABRP/GID8/GJA5/GJB2/GNA11/GRAP/GRB7/GRK2/H…
GO:0098590	CC	GO:0098590	plasma membrane region	131/1779	210/4051	2.55145e-08	4.12779e-06	3.30223e-06	131	ABCC1/ABCG2/ABHD17A/ABHD17C/ABHD6/ACE2/ADGRL1/ADRA1A/ANXA2/ANXA4/AP1S1/AP2A2/APP/AQP3/ARRB1/ATP1A1/ATP1B3/ATP6V1B1/B4GALT1/CD36/CD44/CD81/CFAP126/CFTR/CHRM3/CHRND/CHRNE/CLDN3/CLDN7/CLIC5/CLTA/CLTB/CLTC/CTNNB1/CTSB/CXADR/DAG1/DMTN/DNM1/DNM2/DRAM2/DSTYK/DTNBP1/EHD1/EMP2/ENPP3/EZR/F2R/FXYD1/GABRP/GPR161/GPR37L1/HYAL2/IDE/ITGA3/ITGB1/KCNK1/KCNMA1/KLHDC8B/KRT19/LAMP1/LDLR/LIN7A/LIPE/MAL2/MAPK1/MSN/MXR…
GO:0031410	CC	GO:0031410	cytoplasmic vesicle	248/1779	443/4051	4.40297e-08	4.12779e-06	3.30223e-06	248	ABHD17A/ABHD17C/ABHD2/ABHD6/ACAP1/ACSBG1/ACTG1/ADA/ADAM10/ADRB1/AHCY/ANXA11/ANXA2/ANXA4/ANXA6/AP1M1/AP1S1/AP2A2/AP3M1/AP3S1/APP/ARCN1/ARL8B/ARRB1/ATP1A1/ATP1B3/ATP6V0A2/ATP6V0B/ATP6V1A/ATP8A1/ATP8A2/BACE1/CALU/CAPG/CD79A/CDC42EP2/CDIP1/CFTR/CHMP3/CLIC5/CLINT1/CLK3/CLTA/CLTB/CLTC/CLU/CNP/COMMD1/COMMD7/COPA/COPB2/COPE/COPG1/COPZ1/CORO1A/CORO7/CPE/CPTP/CRISPLD2/CTNS/CTSB/CXADR/CYB561/CYB561A3/CYB561…
GO:0097708	CC	GO:0097708	intracellular vesicle	248/1779	443/4051	4.40297e-08	4.12779e-06	3.30223e-06	248	ABHD17A/ABHD17C/ABHD2/ABHD6/ACAP1/ACSBG1/ACTG1/ADA/ADAM10/ADRB1/AHCY/ANXA11/ANXA2/ANXA4/ANXA6/AP1M1/AP1S1/AP2A2/AP3M1/AP3S1/APP/ARCN1/ARL8B/ARRB1/ATP1A1/ATP1B3/ATP6V0A2/ATP6V0B/ATP6V1A/ATP8A1/ATP8A2/BACE1/CALU/CAPG/CD79A/CDC42EP2/CDIP1/CFTR/CHMP3/CLIC5/CLINT1/CLK3/CLTA/CLTB/CLTC/CLU/CNP/COMMD1/COMMD7/COPA/COPB2/COPE/COPG1/COPZ1/CORO1A/CORO7/CPE/CPTP/CRISPLD2/CTNS/CTSB/CXADR/CYB561/CYB561A3/CYB561…
GO:0042995	CC	GO:0042995	cell projection	208/1779	383/4051	1.13935e-05	0.000534072	0.000427258	208	ABCG2/ABHD17A/ABHD17C/ABR/ACE2/ACTA2/ACTG1/ACTN1/ACTR2/ACTR3/ADAM10/ADGRL1/AHCYL2/ALCAM/ALDH1A1/ANKMY2/AP3D1/AP3M1/AP3S1/APP/ARF1/ARL8B/ARPC5/ARPC5L/ARPIN/ARRB1/ATG5/ATP1A1/ATP1B3/ATP2B4/ATP6V1B1/ATP8A2/AURKA/B4GALT1/BACE1/BAG2/BAIAP2/BASP1/CAPG/CAPN2/CAPRIN1/CD36/CD44/CDC42SE2/CEP41/CFAP126/CFAP20/CFAP206/CIBAR1/CLIC4/CNGA1/CORO1A/CRIPT/CTNNB1/CXADR/CYFIP1/CYLD/CYRIB/CYTH2/DMTN/DNAL4/DNM2/DTNBP1…
GO:0098588	CC	GO:0098588	bounding membrane of organelle	239/1779	455/4051	5.56255e-05	0.00180952	0.00144761	239	ABHD17A/ABHD17C/ABHD6/ACAP1/ADAM10/AIFM2/ANXA4/ANXA6/AP1M1/AP1S1/AP2A2/AP3D1/APOO/ARCN1/ARFGAP3/ARFGEF1/ARL8B/ATP2C1/ATP6V0A2/ATP6V0B/ATP6V0C/ATP6V0D1/ATP6V1A/ATP6V1B1/ATP6V1C1/ATP6V1F/ATP8A1/B4GAT1/BCL2/BET1L/BNIP3/BNIP3L/BORCS6/CDIP1/CFTR/CHMP3/CHPT1/CLCC1/CLCN7/CLTA/CLTB/CLTC/CNIH1/COG7/COG8/COMMD1/COPA/COPB2/COPE/COPG1/COPZ1/CORO1A/CORO7/CPE/CPTP/CSNK1D/CTNS/CYB561/CYB561A3/CYB5R3/DHCR7/DMTN/…
GO:0045177	CC	GO:0045177	apical part of cell	48/1779	74/4051	0.000201528	0.00419849	0.0033588	48	ABCC1/ABCG2/ACE2/ACTG1/ANXA4/ATP1B3/ATP6V1B1/CD36/CD44/CFAP126/CFTR/CLIC4/CLIC5/CTNNB1/CTSB/DRAM2/DSTYK/EMP2/ENPP3/EZR/FXYD1/HOMER1/HYAL2/KCNK1/KCNMA1/LDLR/MAL2/MSN/MYL12B/PLAUR/RAB18/RDX/RIPOR2/SCNN1B/SCNN1G/SEPTIN7/SLC1A1/SLC22A1/SLC2A1/SLC39A14/SLC44A4/SLC46A1/SLC6A4/SNX10/SPEF1/TEK/TUBG1/UPK1A
GO:0098797	CC	GO:0098797	plasma membrane protein complex	43/1779	67/4051	0.000603841	0.00984524	0.00787619	43	ABHD6/ACVR1/ACVR2A/ANXA2/AP2A2/ARRB1/C7/CACNB2/CD79A/CHRND/CLTA/CLTB/CLTC/CTNNB1/CYBA/FXYD1/GJA5/GJB2/GNB1/GNG12/GNG2/IGF1/ITGA2/ITGA3/ITGAL/ITGAV/ITGB1/ITGB2/KCNJ2/KCNK1/KCNMA1/MR1/NCF1/NCF2/PSEN1/PSENEN/S100A10/SCN1B/SCN4B/SCNN1B/TGFBR1/TMED10/TRAF6
GO:0015629	CC	GO:0015629	actin cytoskeleton	46/1779	73/4051	0.000714475	0.00997149	0.00797719	46	ACTA2/ACTG1/ACTN1/ACTR2/ACTR3/ANXA6/ARPC5/BAIAP2/CCDC102A/CORO1A/CTNNA1/DHX9/DMTN/DSTN/EZR/FERMT3/FSCN2/FYN/GABARAP/KRT19/MAEA/MSRB1/MTPN/MYH10/MYL12B/MYO10/MYO1C/MYO1D/MYO6/PAK1/PDLIM4/PDXP/RAB5A/RAC2/RND1/SCIN/SEPTIN2/SH3GL1/SLC2A1/SPRY2/TEK/TMOD1/TPM1/TRMT10A/WASL/WDR1
GO:0045178	CC	GO:0045178	basal part of cell	29/1779	42/4051	0.00083783	0.010834	0.0086672	29	ANXA2/AQP3/ATP1A1/ATP1B3/ATP6V1B1/B4GALT1/CD81/CHRM3/CLDN7/CTNNB1/CXADR/DSTYK/EZR/IDE/LDLR/MSN/MYO1D/NOD2/OSCP1/PLPP3/SLC22A1/SLC2A1/SLC39A14/SLC46A1/SLC4A4/SLC51B/SPEF1/TEK/WASF2
GO:0043197	CC	GO:0043197	dendritic spine	14/1779	17/4051	0.00136792	0.0160303	0.0128242	14	ABHD17A/ABHD17C/ABR/CRIPT/DTNBP1/FBXO2/HOMER1/NR1D1/PALMD/PDLIM4/PPP3CA/PRKACA/SEPTIN11/SYNDIG1
GO:0045121	CC	GO:0045121	membrane raft	44/1779	71/4051	0.00152895	0.0168634	0.0134908	44	ABCG2/ADRA1A/ATP1A1/BACE1/CD36/CD79A/CTNNB1/CXADR/EFHD2/EMP2/ERLIN2/F2R/FXYD1/FYN/HYAL2/KCNMA1/LAMP1/LAMTOR1/LDLR/LIPE/MAL2/MAPK1/NEU3/PECAM1/PLPP2/PLPP3/PPP2CA/PPT1/PRKACA/PRKAR1A/RAB5A/S100A10/S1PR1/SLC2A1/SLC2A4/SLC6A4/SLC8A1/STIM1/TEK/TGFBR1/TLR2/TPP1/VAMP2/VDAC1
GO:0098857	CC	GO:0098857	membrane microdomain	44/1779	71/4051	0.00152895	0.0168634	0.0134908	44	ABCG2/ADRA1A/ATP1A1/BACE1/CD36/CD79A/CTNNB1/CXADR/EFHD2/EMP2/ERLIN2/F2R/FXYD1/FYN/HYAL2/KCNMA1/LAMP1/LAMTOR1/LDLR/LIPE/MAL2/MAPK1/NEU3/PECAM1/PLPP2/PLPP3/PPP2CA/PPT1/PRKACA/PRKAR1A/RAB5A/S100A10/S1PR1/SLC2A1/SLC2A4/SLC6A4/SLC8A1/STIM1/TEK/TGFBR1/TLR2/TPP1/VAMP2/VDAC1
GO:0005887	CC	GO:0005887	integral component of plasma membrane	57/1779	97/4051	0.00207127	0.0215757	0.0172606	57	ABHD6/ACVR1/ALCAM/BACE1/C7/CCRL2/CD81/CDH2/CFTR/CHRND/CLDN4/CYBA/FCER1G/FXYD1/GJB2/HRH1/IFNAR1/IFNAR2/ITGA2/ITGA3/ITGAL/ITGAV/ITGB1/ITGB2/KCNJ2/KCNK1/KCNMA1/LAPTM5/LGR4/LPAR1/LRRC8C/MAEA/MIGA2/MPZL1/NCF1/NCF2/P2RX4/PACC1/PLAUR/PSEN1/SCARB1/SCN1B/SCN4B/SLC16A1/SLC1A1/SLC2A1/SLC2A4/SLC39A14/STIM1/STRA6/SYNDIG1/THBD/TMEM150B/TMEM150C/TRAF6/TYROBP/UPK1A
GO:0000139	CC	GO:0000139	Golgi membrane	71/1779	126/4051	0.00293976	0.0275602	0.0220482	71	ADAM10/AP3D1/APOO/ARCN1/ARFGAP3/ARFGEF1/ATP2C1/B4GAT1/BET1L/CHPT1/CLCC1/CNIH1/COG7/COG8/COPA/COPB2/COPE/COPG1/COPZ1/CORO7/CSNK1D/DSE/EMP2/EXT1/EXT2/GABARAP/GALNT6/GOLPH3L/IGF2R/ITM2B/KDELR2/LFNG/LLGL1/MR1/NAA60/NAPEPLD/NMNAT2/PGAP2/PI4KB/PITPNB/PLA2G4A/PLPP3/PSEN1/PSEN2/RAB21/RER1/RHBDF1/RHEB/RNF13/RTN3/SCAMP5/SEC16B/SERINC3/SH3GLB1/SLC35C1/SLC39A13/SNAP29/SPRING1/ST3GAL5/ST3GAL6/ST8SIA1/SURF4/TB…
GO:0005938	CC	GO:0005938	cell cortex	31/1779	49/4051	0.00475607	0.0428885	0.0343108	31	ACTN1/ASPH/BFSP2/CLIC5/CORO1A/CTBP2/CTNNB1/DSTN/EZR/FGF1/GLRX3/GNAI1/KRT19/LASP1/MAEA/MPP7/MYH10/MYL12B/MYO10/MYO1D/RHOA/SCIN/SEPTIN11/SEPTIN2/SEPTIN6/SEPTIN7/SLC2A1/TMOD1/TRAF6/WASF1/WASL
GO:0030016	CC	GO:0030016	myofibril	24/1779	36/4051	0.00480352	0.0428885	0.0343108	24	ACTA2/ACTG1/ACTN1/ASB2/ATP2B4/CALD1/CAPN3/CTNNB1/DNAJB6/FBXO32/FHL2/GLRX3/HOMER1/HSPB1/KRT19/MTM1/MYL12B/PDLIM1/PPP3CA/SCO2/SMN2/TCAP/TMOD1/TPM1
GO:0009986	CC	GO:0009986	cell surface	46/1779	78/4051	0.00493228	0.0430141	0.0344112	46	ACE2/ADAM10/ANXA4/APP/B4GALT1/BACE1/BCAM/C3/CD5/CD79A/CD9/CD99L2/CDH2/CLIC4/CLPTM1/CTSB/EMP2/ENPP3/ERP29/GOT2/HYAL2/IDE/IGF2R/ITGA5/ITGAL/ITGB1/KCNMA1/LAMP1/LDLR/LPAR1/LPL/LTF/MSN/NOD2/NRROS/PLAUR/S1PR1/SCARB1/SCNN1B/SLC2A4/TEK/TGFBR1/THBS1/TMEM102/TNS1/TYROBP
bta04611	KEGG	bta04611	Platelet activation	71/2308	101/6118	2.23915e-11	7.3892e-09	5.13826e-09	71	ACTG1/ADCY6/ADCY7/ADCY9/AKT1/AKT2/AKT3/APBB1IP/ARHGAP35/ARHGEF12/F2R/FCER1G/FCGR2A/FERMT3/FYN/GNAI1/GNAI2/GNAI3/GNAQ/GNAS/GUCY1A1/ITGA2/ITGA2B/ITGB1/ITGB3/ITPR2/ITPR3/LCP2/LYN/MAPK1/MAPK13/MAPK14/MYL12B/MYLK/ORAI1/P2RX1/P2RY12/PIK3CB/PIK3CD/PIK3R1/PIK3R2/PIK3R3/PIK3R6/PLA2G4A/PLA2G4F/PLCB1/PLCB2/PLCB3/PLCB4/PPP1CA/PPP1CC/PPP1R12A/PRKACA/PRKACB/PRKCI/PRKCZ/PRKG1/PRKG2/PTGIR/RAP1A/RAP1B/RASGRP1/RAS…
bta04015	KEGG	bta04015	Rap1 signaling pathway	108/2308	177/6118	1.6369e-10	2.70088e-08	1.87812e-08	108	ACTG1/ADCY6/ADCY7/ADCY9/ADORA2B/AKT1/AKT2/AKT3/ANGPT4/APBB1IP/BCAR1/CALM2/CALM3/CRK/CSF1/CTNNB1/CTNND1/EFNA1/EFNA2/EFNA4/EFNA5/EPHA2/EVL/F2R/FGF1/FGF2/FGFR1/FLT1/FYB1/GNAI1/GNAI2/GNAI3/GNAQ/GNAS/IGF1/IGF1R/ITGA2B/ITGAL/ITGAM/ITGB1/ITGB2/ITGB3/KIT/KRAS/LAT/LCP2/LPAR1/LPAR2/LPAR3/LPAR5/MAGI3/MAP2K1/MAP2K2/MAP2K3/MAP2K6/MAPK1/MAPK13/MAPK14/MET/MRAS/NGFR/PARD6B/PARD6G/PDGFB/PDGFD/PDGFRA/PGF/PIK3CB/PI…
bta04022	KEGG	bta04022	cGMP-PKG signaling pathway	79/2308	127/6118	1.43539e-08	1.57892e-06	1.09794e-06	79	ADCY6/ADCY7/ADCY9/ADRA1A/ADRA1B/ADRA2A/ADRB1/AKT1/AKT2/AKT3/ATF2/ATF6B/ATP1A1/ATP1B1/ATP1B3/ATP2A3/ATP2B1/ATP2B2/ATP2B4/BAD/CALM2/CALM3/CNGA1/CREB3L1/CREB3L2/CREB5/EDNRB/GNA11/GNA12/GNAI1/GNAI2/GNAI3/GNAQ/GTF2I/GTF2IRD1/GUCY1A1/ITPR2/ITPR3/KCNMA1/KCNMB1/KCNMB4/MAP2K1/MAP2K2/MAPK1/MEF2A/MEF2C/MEF2D/MYLK/NFATC1/NFATC3/PDE2A/PDE5A/PIK3R6/PLCB1/PLCB2/PLCB3/PLCB4/PPIF/PPP1CA/PPP1CC/PPP1R12A/PPP3CA/PPP…
bta04670	KEGG	bta04670	Leukocyte transendothelial migration	62/2308	94/6118	2.16717e-08	1.78791e-06	1.24327e-06	62	ACTG1/ACTN1/ACTN4/ARHGAP35/BCAR1/CD99/CD99L2/CLDN11/CLDN19/CLDN3/CLDN4/CLDN7/CLDN8/CTNNA1/CTNNB1/CTNND1/CXCL12/CYBA/EZR/F11R/GNAI1/GNAI2/GNAI3/ITGA4/ITGAL/ITGAM/ITGB1/ITGB2/ITK/JAM2/JAM3/MAPK13/MAPK14/MSN/MYL12B/NCF1/NCF2/NCF4/OCLN/PECAM1/PIK3CB/PIK3CD/PIK3R1/PIK3R2/PIK3R3/PLCG1/PRKCA/PTK2/PTK2B/RAC1/RAC2/RAP1A/RAP1B/RAPGEF4/RASSF5/RHOA/RHOH/ROCK2/SIPA1/VASP/VAV1/VCL
bta04810	KEGG	bta04810	Regulation of actin cytoskeleton	104/2308	182/6118	5.46808e-08	3.60894e-06	2.50956e-06	104	ABI2/ACTG1/ACTN1/ACTN4/ACTR2/ACTR3/AKT1/AKT2/AKT3/APC/ARHGAP35/ARHGEF12/ARHGEF7/ARPC1B/ARPC5/ARPC5L/BAIAP2/BCAR1/BRK1/C7/C8G/CHRM3/CRK/CXCL12/CYFIP1/CYFIP2/DIAPH3/EZR/F2R/FGD3/FGF1/FGF2/FGFR1/GNA12/GNG12/GSN/ITGA2/ITGA2B/ITGA3/ITGA4/ITGA5/ITGA6/ITGA7/ITGA9/ITGAL/ITGAM/ITGAV/ITGB1/ITGB2/ITGB3/ITGB4/ITGB7/ITGB8/KRAS/LIMK2/LPAR1/LPAR2/LPAR5/MAP2K1/MAP2K2/MAPK1/MRAS/MSN/MYH10/MYH11/MYH9/MYL12B/MYLK/N…
bta04010	KEGG	bta04010	MAPK signaling pathway	131/2308	247/6118	4.31407e-07	2.37274e-05	1.64994e-05	131	AKT1/AKT2/AKT3/ANGPT4/ARRB1/ATF2/CACNA1A/CACNA1E/CACNA1G/CACNA2D1/CACNB2/CASP3/CDC25B/CRK/CSF1/DUSP1/DUSP4/DUSP7/EFNA1/EFNA2/EFNA4/EFNA5/ELK4/EPHA2/ERBB2/ERBB3/FAS/FGF1/FGF2/FGFR1/FLNB/FLT1/FLT3LG/GNA12/GNG12/GRB2/HSPB1/IGF1/IGF1R/IL1RAP/JUND/KIT/KRAS/MAP2K1/MAP2K2/MAP2K3/MAP2K4/MAP2K5/MAP2K6/MAP3K1/MAP3K11/MAP3K13/MAP3K14/MAP3K5/MAP3K6/MAP4K1/MAP4K2/MAP4K3/MAPK1/MAPK13/MAPK14/MAPK7/MAPK8IP1/MAPK…
bta04072	KEGG	bta04072	Phospholipase D signaling pathway	74/2308	127/6118	1.68985e-06	7.35381e-05	5.11366e-05	74	ADCY6/ADCY7/ADCY9/AGPAT1/AGPAT2/AGPAT4/AGPAT5/AGT/AKT1/AKT2/AKT3/ARF1/CXCR1/CXCR2/CYTH2/CYTH4/DGKA/DGKD/DGKZ/DNM1/DNM2/DNM3/F2R/FCER1G/FYN/GAB1/GNA12/GNAS/GRB2/KIT/KRAS/LPAR1/LPAR2/LPAR3/LPAR5/MAP2K1/MAP2K2/MAPK1/MRAS/PDGFB/PDGFD/PDGFRA/PIK3CB/PIK3CD/PIK3R1/PIK3R2/PIK3R3/PIK3R6/PIP5K1A/PIP5K1C/PLA2G4A/PLA2G4F/PLCB1/PLCB2/PLCB3/PLCB4/PLCG1/PLD1/PLPP1/PLPP2/PLPP3/PRKCA/PTGFR/PTK2B/RAF1/RALA/RALB/RA…
bta04666	KEGG	bta04666	Fc gamma R-mediated phagocytosis	58/2308	94/6118	1.78274e-06	7.35381e-05	5.11366e-05	58	ACTR2/ACTR3/AKT1/AKT2/AKT3/AMPH/ARPC1B/ARPC5/ARPC5L/ASAP1/ASAP3/BIN1/CRK/DNM2/FCGR2A/FCGR2B/GSN/HCK/INPP5D/INPPL1/LAT/LIMK2/LYN/MAP2K1/MAPK1/MARCKSL1/MYO10/NCF1/PAK1/PIK3CB/PIK3CD/PIK3R1/PIK3R2/PIK3R3/PIP5K1A/PIP5K1C/PLA2G4A/PLA2G4F/PLCG1/PLD1/PLPP1/PLPP2/PLPP3/PRKCA/PRKCD/PRKCE/PTPRC/RAC1/RAC2/RAF1/RPS6KB1/SCIN/SYK/VASP/VAV1/WASF1/WASF2/WASF3
bta04144	KEGG	bta04144	Endocytosis	126/2308	242/6118	2.58656e-06	9.48407e-05	6.59498e-05	126	ACAP1/ACAP2/ACAP3/ACTR2/ACTR3/AGAP2/AMPH/AP2A1/AP2A2/ARF1/ARF3/ARF4/ARFGAP3/ARFGEF1/ARFGEF2/ARPC1B/ARPC5/ARPC5L/ARRB1/ASAP1/ASAP3/BIN1/CAPZA1/CAPZA2/CAPZB/CBLC/CHMP1A/CHMP2A/CHMP3/CHMP4B/CHMP4C/CHMP6/CLTA/CLTB/CLTC/CXCR1/CXCR2/CYTH2/CYTH4/DAB2/DNAJC6/DNM1/DNM2/DNM3/EHD1/EHD3/EHD4/EPN1/EPN2/EPN3/EPS15/EPS15L1/FOLR1/GIT2/GRK2/GRK3/GRK5/IGF1R/IGF2R/IL2RA/IQSEC1/IST1/KIF5B/KIF5C/LDLR/LDLRAP1/LOC51267…
bta04071	KEGG	bta04071	Sphingolipid signaling pathway	64/2308	108/6118	3.86246e-06	0.000121129	8.42303e-05	64	ABCC1/ACER2/AKT1/AKT2/AKT3/ASAH1/BCL2/BID/CERS2/CERS5/CERS6/DEGS1/DEGS2/FCER1G/FYN/GNA12/GNAI1/GNAI2/GNAI3/GNAQ/KRAS/MAP2K1/MAP2K2/MAP3K5/MAPK1/MAPK13/MAPK14/MAPK9/PIK3CB/PIK3CD/PIK3R1/PIK3R2/PIK3R3/PLCB1/PLCB2/PLCB3/PLCB4/PLD1/PPP2CA/PPP2CB/PPP2R1A/PPP2R5A/PPP2R5C/PPP2R5D/PRKCA/PRKCE/PRKCZ/PTEN/RAC1/RAC2/RAC3/RAF1/RHOA/ROCK2/S1PR1/S1PR2/S1PR3/SGMS1/SGPL1/SGPP1/SPTLC1/SPTLC2/TNF/TNFRSF1A
bta04961	KEGG	bta04961	Endocrine and other factor-regulated calcium reabsorption	30/2308	41/6118	4.03765e-06	0.000121129	8.42303e-05	30	ADCY6/ADCY9/AP2A1/AP2A2/ATP1A1/ATP1B1/ATP1B3/ATP2B1/ATP2B2/ATP2B4/CLTA/CLTB/CLTC/DNM1/DNM2/DNM3/ESR1/GNAQ/GNAS/PLCB1/PLCB2/PLCB3/PLCB4/PRKACA/PRKACB/PRKCA/RAB11A/SLC8A1/SLC8A3/VDR
bta04261	KEGG	bta04261	Adrenergic signaling in cardiomyocytes	66/2308	113/6118	5.47713e-06	0.000150621	0.000104738	66	ADCY6/ADCY7/ADCY9/ADRA1A/ADRA1B/ADRB1/AGT/AKT1/AKT2/AKT3/ATF2/ATF6B/ATP1A1/ATP1B1/ATP1B3/ATP2A3/ATP2B1/ATP2B2/ATP2B4/BCL2/CACNA2D1/CACNB2/CALM2/CALM3/CAMK2A/CREB3L1/CREB3L2/CREB5/CREM/GNAI1/GNAI2/GNAI3/GNAQ/GNAS/KCNQ1/MAPK1/MAPK13/MAPK14/PIK3R6/PLCB1/PLCB2/PLCB3/PLCB4/POPDC2/PPP1CA/PPP1CC/PPP2CA/PPP2CB/PPP2R1A/PPP2R5A/PPP2R5C/PPP2R5D/PRKACA/PRKACB/PRKCA/RAPGEF4/RPS6KA5/SCN1B/SCN4B/SCN5A/SLC8A1/SL…
bta04151	KEGG	bta04151	PI3K-Akt signaling pathway	133/2308	261/6118	5.99059e-06	0.000152069	0.000105745	133	AKT1/AKT2/AKT3/ANGPT4/ATF2/ATF6B/BAD/BCL2/CDC37/CDK6/CDKN1A/COL4A1/CREB3L1/CREB3L2/CREB5/CRTC2/CSF1/CSF3/EFNA1/EFNA2/EFNA4/EFNA5/EIF4B/EIF4E/EIF4EBP1/EPHA2/ERBB2/ERBB3/F2R/FGF1/FGF2/FGFR1/FLT1/FLT3LG/FOXO3/G6PC3/GHR/GNB1/GNG11/GNG12/GNG2/GNG4/GNG7/GNGT2/GRB2/GSK3B/HSP90AA1/HSP90AB1/IFNAR1/IFNAR2/IGF1/IGF1R/IL2RA/IL4R/IL6R/ITGA2/ITGA2B/ITGA3/ITGA4/ITGA5/ITGA6/ITGA7/ITGA9/ITGAV/ITGB1/ITGB3/ITGB4/IT…
bta04972	KEGG	bta04972	Pancreatic secretion	41/2308	63/6118	8.99304e-06	0.000209051	0.000145369	41	ADCY6/ADCY7/ADCY9/ATP1A1/ATP1B1/ATP1B3/ATP2A3/ATP2B1/ATP2B2/ATP2B4/CD38/CELA2A/CFTR/CHRM3/CPB2/GNAQ/GNAS/ITPR2/ITPR3/KCNMA1/KCNQ1/PLA2G12A/PLA2G3/PLCB1/PLCB2/PLCB3/PLCB4/PRKCA/RAB11A/RAB27B/RAB3D/RAB8A/RAC1/RAP1A/RAP1B/RHOA/SLC12A2/SLC4A2/SLC4A4/SLC9A1/TPCN2
bta04510	KEGG	bta04510	Focal adhesion	89/2308	164/6118	9.50231e-06	0.000209051	0.000145369	89	ACTG1/ACTN1/ACTN4/AKT1/AKT2/AKT3/ARHGAP35/BAD/BCAR1/BCL2/CAPN2/COL4A1/CRK/CTNNB1/ERBB2/FLNB/FLT1/FYN/GRB2/GSK3B/IGF1/IGF1R/ITGA2/ITGA2B/ITGA3/ITGA4/ITGA5/ITGA6/ITGA7/ITGA9/ITGAV/ITGB1/ITGB3/ITGB4/ITGB7/ITGB8/LAMA4/LAMB2/LAMB3/LAMC1/MAP2K1/MAPK1/MAPK9/MET/MYL12B/MYLK/PAK1/PAK2/PAK4/PARVA/PARVB/PARVG/PDGFB/PDGFD/PDGFRA/PGF/PIK3CB/PIK3CD/PIK3R1/PIK3R2/PIK3R3/PIP5K1A/PIP5K1C/PPP1CA/PPP1CC/PPP1R12A/PR…
bta04270	KEGG	bta04270	Vascular smooth muscle contraction	58/2308	98/6118	1.1546e-05	0.000238136	0.000165594	58	ACTA2/ADCY6/ADCY7/ADCY9/ADM2/ADORA2B/ADRA1A/ADRA1B/AGT/ARHGEF12/CALCB/CALCB/CALCRL/CALD1/CALM2/CALM3/EDN1/EDN2/GNA11/GNA12/GNAQ/GNAS/GUCY1A1/ITPR2/ITPR3/KCNMA1/KCNMB1/KCNMB4/MAP2K1/MAP2K2/MAPK1/MYH10/MYH11/MYH9/MYLK/PLA2G12A/PLA2G3/PLA2G4A/PLA2G4F/PLCB1/PLCB2/PLCB3/PLCB4/PPP1CA/PPP1CC/PPP1R12A/PRKACA/PRKACB/PRKCA/PRKCD/PRKCE/PRKCH/PRKCQ/PRKG1/PTGIR/RAF1/RHOA/ROCK2
bta04924	KEGG	bta04924	Renin secretion	35/2308	52/6118	1.35593e-05	0.00026321	0.000183029	35	ADCY6/ADCYAP1R1/ADRB1/AGT/CALM2/CALM3/CTSB/EDN1/EDN2/GNAI1/GNAI2/GNAI3/GNAQ/GNAS/GUCY1A1/ITPR2/ITPR3/KCNJ2/KCNMA1/ORAI1/PDE1A/PLCB1/PLCB2/PLCB3/PLCB4/PPP3CA/PPP3CB/PPP3CC/PPP3R1/PRKACA/PRKACB/PRKG2/PTGER2/PTGER4/REN
bta04935	KEGG	bta04935	Growth hormone synthesis, secretion and action	59/2308	102/6118	2.56894e-05	0.000453332	0.000315236	59	ADCY6/ADCY7/ADCY9/AKT1/AKT2/AKT3/ATF2/ATF6B/BCAR1/CREB3L1/CREB3L2/CREB5/CREBBP/CRK/GHR/GNA11/GNAI1/GNAI2/GNAI3/GNAQ/GNAS/GRB2/GSK3B/IGF1/IGFALS/IGFBP3/ITPR2/ITPR3/KRAS/MAP2K1/MAP2K2/MAP2K3/MAP2K4/MAP2K6/MAP3K1/MAPK1/MAPK13/MAPK14/MAPK9/PIK3CB/PIK3CD/PIK3R1/PIK3R2/PIK3R3/PLCB1/PLCB2/PLCB3/PLCB4/PLCG1/PRKACA/PRKACB/PRKCA/PTK2/RAF1/SHC4/SOCS3/STAT1/STAT3/STAT5B
bta04926	KEGG	bta04926	Relaxin signaling pathway	58/2308	100/6118	2.68909e-05	0.000453332	0.000315236	58	ACTA2/ADCY6/ADCY7/ADCY9/AKT1/AKT2/AKT3/ARRB1/ATF2/ATF6B/COL4A1/CREB3L1/CREB3L2/CREB5/EDN1/EDNRB/GNA15/GNAI1/GNAI2/GNAI3/GNAS/GNB1/GNG11/GNG12/GNG2/GNG4/GNG7/GNGT2/GRB2/KRAS/MAP2K1/MAP2K2/MAP2K4/MAPK1/MAPK13/MAPK14/MAPK9/NOS2/PIK3CB/PIK3CD/PIK3R1/PIK3R2/PIK3R3/PLCB1/PLCB2/PLCB3/PLCB4/PRKACA/PRKACB/PRKCA/PRKCZ/RAF1/SHC4/SMAD2/TGFBR1/TGFBR2/VEGFA/VEGFC
bta05211	KEGG	bta05211	Renal cell carcinoma	42/2308	67/6118	2.74747e-05	0.000453332	0.000315236	42	AKT1/AKT2/AKT3/ARNT/ARNT2/BAD/CDKN1A/CREBBP/CRK/EGLN1/EGLN2/EGLN3/EPAS1/ETS1/FLCN/GAB1/GRB2/HIF1A/KRAS/MAP2K1/MAP2K2/MAPK1/MET/PAK1/PAK2/PAK4/PDGFB/PIK3CB/PIK3CD/PIK3R1/PIK3R2/PIK3R3/PRCC/RAC1/RAF1/RAP1A/RAP1B/RAPGEF1/SLC2A1/TGFB2/TGFB3/VEGFA
bta05100	KEGG	bta05100	Bacterial invasion of epithelial cells	44/2308	72/6118	4.4159e-05	0.000693927	0.00048254	44	ACTG1/ACTR2/ACTR3/ARHGAP10/ARHGEF26/ARPC1B/ARPC5/ARPC5L/BCAR1/CD2AP/CLTA/CLTB/CLTC/CRK/CTNNA1/CTNNB1/DNM1/DNM2/DNM3/ELMO1/ELMO2/GAB1/HCLS1/ITGA5/ITGB1/MET/PIK3CB/PIK3CD/PIK3R1/PIK3R2/PIK3R3/PTK2/RAC1/RHOA/RHOG/SEPTIN11/SEPTIN2/SEPTIN6/SEPTIN8/SHC4/VCL/WASF1/WASF2/WASL
bta04664	KEGG	bta04664	Fc epsilon RI signaling pathway	38/2308	60/6118	4.74674e-05	0.000712011	0.000495114	38	AKT1/AKT2/AKT3/ALOX5/ALOX5AP/FCER1G/FYN/GRB2/INPP5D/KRAS/LAT/LCP2/LYN/MAP2K1/MAP2K2/MAP2K3/MAP2K4/MAP2K6/MAPK1/MAPK13/MAPK14/MAPK9/PIK3CB/PIK3CD/PIK3R1/PIK3R2/PIK3R3/PLA2G4A/PLA2G4F/PLCG1/PRKCA/RAC1/RAC2/RAC3/RAF1/SYK/TNF/VAV1
bta04014	KEGG	bta04014	Ras signaling pathway	99/2308	192/6118	5.11616e-05	0.000734057	0.000510445	99	ABL1/ABL2/AKT1/AKT2/AKT3/ANGPT4/BAD/CALM2/CALM3/CSF1/EFNA1/EFNA2/EFNA4/EFNA5/EPHA2/ETS1/ETS2/FGF1/FGF2/FGFR1/FLT1/FLT3LG/GAB1/GNB1/GNG11/GNG12/GNG2/GNG4/GNG7/GNGT2/GRB2/IGF1/IGF1R/KIT/KRAS/KSR2/LAT/LOC618367/MAP2K1/MAP2K2/MAPK1/MAPK9/MET/MRAS/NF1/NGFR/NTRK2/PAK1/PAK2/PAK4/PDGFB/PDGFD/PDGFRA/PGF/PIK3CB/PIK3CD/PIK3R1/PIK3R2/PIK3R3/PLA1A/PLA2G12A/PLA2G3/PLA2G4A/PLA2G4F/PLCE1/PLCG1/PLD1/PRKACA/PRKACB…
bta04750	KEGG	bta04750	Inflammatory mediator regulation of TRP channels	48/2308	81/6118	6.21149e-05	0.00085408	0.000593906	48	ADCY6/ADCY7/ADCY9/ALOX12E/ASIC3/CALM2/CALM3/CAMK2A/F2RL1/GNAQ/GNAS/HRH1/IGF1/IL1RAP/ITPR2/ITPR3/MAP2K3/MAP2K6/MAPK13/MAPK14/MAPK9/P2RY2/PIK3CB/PIK3CD/PIK3R1/PIK3R2/PIK3R3/PLA2G4A/PLA2G4F/PLCB1/PLCB2/PLCB3/PLCB4/PLCG1/PPP1CA/PPP1CC/PRKACA/PRKACB/PRKCA/PRKCD/PRKCE/PRKCH/PRKCQ/PTGER2/PTGER4/TRPV2/TRPV3/TRPV4
bta04970	KEGG	bta04970	Salivary secretion	39/2308	63/6118	7.94124e-05	0.000992093	0.000689877	39	ADCY6/ADCY7/ADCY9/ADRA1A/ADRA1B/ADRB1/ATP1A1/ATP1B1/ATP1B3/ATP2B1/ATP2B2/ATP2B4/CALM2/CALM3/CD38/CHRM3/CST3/GNAQ/GNAS/GUCY1A1/ITPR2/ITPR3/KCNMA1/KCNN4/LPO/PLCB1/PLCB2/PLCB3/PLCB4/PRKACA/PRKACB/PRKCA/PRKG1/PRKG2/SLC12A2/SLC4A2/SLC9A1/TRPV6/VAMP2
bta05230	KEGG	bta05230	Central carbon metabolism in cancer	38/2308	61/6118	8.04614e-05	0.000992093	0.000689877	38	AKT1/AKT2/AKT3/ERBB2/FGFR1/GCK/GLS/GLS2/HIF1A/HK1/HKDC1/IDH2/KIT/KRAS/MAP2K1/MAP2K2/MAPK1/MET/PDGFRA/PDK1/PFKL/PFKP/PGAM1/PIK3CB/PIK3CD/PIK3R1/PIK3R2/PIK3R3/PKM/PTEN/RAF1/RET/SCO2/SIRT6/SLC16A3/SLC2A1/SLC7A5/TIGAR
bta04971	KEGG	bta04971	Gastric acid secretion	34/2308	53/6118	8.11713e-05	0.000992093	0.000689877	34	ACTG1/ADCY6/ADCY7/ADCY9/ATP1A1/ATP1B1/ATP1B3/ATP4B/CALM2/CALM3/CAMK2A/CFTR/CHRM3/EZR/GNAI1/GNAI2/GNAI3/GNAQ/GNAS/ITPR2/ITPR3/KCNJ16/KCNJ2/KCNQ1/MYLK/PLCB1/PLCB2/PLCB3/PLCB4/PRKACA/PRKACB/PRKCA/SLC4A2/SLC9A1
bta05163	KEGG	bta05163	Human cytomegalovirus infection	104/2308	206/6118	0.000100471	0.00118412	0.000823406	104	ADCY6/ADCY7/ADCY9/AKT1/AKT2/AKT3/ARHGEF12/ATF2/ATF6B/BCAR1/BID/CALM2/CALM3/CASP3/CASP8/CCL2/CCL3/CCR1/CDK6/CDKN1A/CREB3L1/CREB3L2/CREB5/CRK/CTNNB1/CXCL12/CXCR2/CYCS/E2F1/E2F3/EIF4EBP1/FADD/FAS/GNA11/GNA12/GNAI1/GNAI2/GNAI3/GNAQ/GNAS/GNB1/GNG11/GNG12/GNG2/GNG4/GNG7/GNGT2/GRB2/GSK3B/IL6R/ITGAV/ITGB3/ITPR2/ITPR3/JAK1/KRAS/LOC512672/MAP2K1/MAP2K2/MAP2K6/MAPK1/MAPK13/MAPK14/NFATC1/NFATC3/PDGFRA/PDIA3/…
bta04925	KEGG	bta04925	Aldosterone synthesis and secretion	45/2308	76/6118	0.000107681	0.00122534	0.000852067	45	ADCY6/ADCY7/ADCY9/AGT/ATF2/ATF6B/ATP1A1/ATP1B1/ATP1B3/ATP2B1/ATP2B2/ATP2B4/CACNA1G/CALM2/CALM3/CAMK1/CAMK1G/CAMK2A/CREB3L1/CREB3L2/CREB5/CYP11A1/DAGLA/GNA11/GNAQ/GNAS/ITPR2/ITPR3/KCNK9/LDLR/LIPE/NR4A1/NR4A2/ORAI1/PDE2A/PLCB1/PLCB2/PLCB3/PLCB4/PRKACA/PRKACB/PRKCA/PRKCE/PRKD3/SCARB1
bta04928	KEGG	bta04928	Parathyroid hormone synthesis, secretion and action	50/2308	87/6118	0.000131346	0.00144481	0.00100468	50	ADCY6/ADCY7/ADCY9/ARRB1/ATF2/ATF6B/BCL2/CDKN1A/CREB3L1/CREB3L2/CREB5/CYP27B1/FGFR1/GATA3/GNA11/GNA12/GNAI1/GNAI2/GNAI3/GNAQ/GNAS/HBEGF/ITPR2/ITPR3/JUND/MAP2K1/MAPK1/MEF2A/MEF2C/MEF2D/MMP14/MMP15/NR4A2/PDE4A/PDE4B/PDE4C/PLCB1/PLCB2/PLCB3/PLCB4/PLD1/PRKACA/PRKACB/PRKCA/RAF1/RHOA/RXRA/SLC34A2/SLC9A3R1/VDR
bta04152	KEGG	bta04152	AMPK signaling pathway	61/2308	111/6118	0.000147826	0.00157363	0.00109426	61	ACACA/ACACB/ADIPOR1/ADRA1A/AKT1/AKT1S1/AKT2/AKT3/CAB39/CD36/CFTR/CIDEA/CPT1A/CREB3L1/CREB3L2/CREB5/CRTC2/EEF2/EEF2K/EIF4EBP1/ELAVL1/FASN/FBP1/FOXO3/G6PC3/HMGCR/HNF4A/IGF1/IGF1R/LIPE/MLYCD/PFKFB3/PFKFB4/PFKL/PFKP/PIK3CB/PIK3CD/PIK3R1/PIK3R2/PIK3R3/PPARGC1A/PPP2CA/PPP2CB/PPP2R1A/PPP2R5A/PPP2R5C/PPP2R5D/PRKAA2/PRKAB1/RAB10/RAB11B/RAB14/RAB2A/RAB8A/RHEB/RPS6KB1/RPTOR/SCD5/SLC2A4/SREBF1/TBC1D1
bta05205	KEGG	bta05205	Proteoglycans in cancer	90/2308	176/6118	0.000163363	0.00168468	0.00117148	90	ACTG1/AKT1/AKT2/AKT3/ANK3/ARHGEF12/CAMK2A/CASP3/CD44/CDKN1A/CTNNB1/EIF4B/ERBB2/ERBB3/ESR1/EZR/FAS/FGF2/FGFR1/FLNB/FZD1/FZD10/FZD7/GAB1/GRB2/HBEGF/HCLS1/HIF1A/HPSE/HSPB2/IGF1/IGF1R/ITGA2/ITGA5/ITGAV/ITGB1/ITGB3/ITPR2/ITPR3/KRAS/MAP2K1/MAP2K2/MAPK1/MAPK13/MAPK14/MET/MRAS/MSN/PAK1/PDCD4/PIK3CB/PIK3CD/PIK3R1/PIK3R2/PIK3R3/PLAUR/PLCE1/PLCG1/PPP1CA/PPP1CC/PPP1R12A/PRKACA/PRKACB/PRKCA/PTK2/PTPN6/RAC1/RA…
bta04919	KEGG	bta04919	Thyroid hormone signaling pathway	57/2308	105/6118	0.000370083	0.00370083	0.00257347	57	ACTG1/AKT1/AKT2/AKT3/ATP1A1/ATP1B1/ATP1B3/ATP2A3/BAD/CREBBP/CTNNB1/DIO2/ESR1/GSK3B/HDAC1/HDAC2/HDAC3/HIF1A/ITGAV/ITGB3/KRAS/MAP2K1/MAP2K2/MAPK1/MED12L/MED17/MED4/NCOA1/NCOR1/PFKL/PFKP/PIK3CB/PIK3CD/PIK3R1/PIK3R2/PIK3R3/PLCB1/PLCB2/PLCB3/PLCB4/PLCD1/PLCD3/PLCE1/PLCG1/PRKACA/PRKACB/PRKCA/RAF1/RCAN2/RHEB/RXRA/SLC16A10/SLC2A1/SLC9A1/STAT1/TBC1D4/THRA
bta04730	KEGG	bta04730	Long-term depression	31/2308	50/6118	0.00040949	0.00397446	0.00276374	31	CACNA1A/GNA11/GNA12/GNAI1/GNAI2/GNAI3/GNAQ/GNAS/GUCY1A1/IGF1/IGF1R/ITPR2/ITPR3/KRAS/LYN/MAP2K1/MAP2K2/MAPK1/PLA2G4A/PLA2G4F/PLCB1/PLCB2/PLCB3/PLCB4/PPP2CA/PPP2CB/PPP2R1A/PRKCA/PRKG1/PRKG2/RAF1
bta04360	KEGG	bta04360	Axon guidance	80/2308	157/6118	0.000428572	0.00404083	0.00280989	80	ABL1/ARHGEF12/BMPR2/CAMK2A/CXCL12/DPYSL2/EFNA1/EFNA2/EFNA4/EFNA5/EPHA1/EPHA2/EPHB1/EPHB3/EPHB4/FES/FYN/GNAI1/GNAI2/GNAI3/GSK3B/ITGB1/KRAS/LIMK2/LRIG2/MAPK1/MET/MYL12B/NCK1/NCK2/NFATC3/NTN1/NTNG2/PAK1/PAK2/PAK4/PARD6B/PARD6G/PIK3CB/PIK3CD/PIK3R1/PIK3R2/PIK3R3/PLCG1/PLXNA2/PLXNC1/PPP3CA/PPP3CB/PPP3CC/PPP3R1/PRKCA/PRKCZ/PTK2/RAC1/RAC2/RAC3/RAF1/RASA1/RGS3/RHOA/RHOD/RND1/ROBO1/ROCK2/SEMA3A/SEMA3B/SEM…
bta05418	KEGG	bta05418	Fluid shear stress and atherosclerosis	68/2308	130/6118	0.000441995	0.00405162	0.00281739	68	ACTG1/ACVR1/ACVR2A/ACVR2B/AKT1/AKT2/AKT3/ARHGEF2/ASS1/BCL2/BMPR1A/BMPR2/CALM2/CALM3/CCL2/CTNNB1/CYBA/DUSP1/EDN1/GSTA1/HSP90AA1/HSP90AB1/ITGA2B/ITGAV/ITGB3/KEAP1/LOC615514/MAP2K4/MAP2K5/MAP2K6/MAP3K5/MAPK13/MAPK14/MAPK7/MAPK9/MEF2A/MEF2C/MGST2/NCF1/NCF2/NFE2L2/NQO1/PDGFB/PECAM1/PIAS4/PIK3CB/PIK3CD/PIK3R1/PIK3R2/PIK3R3/PLAT/PRKAA2/PRKCZ/PTK2/RAC1/RAC2/RAC3/RHOA/SDC1/SDC2/SUMO1/SUMO3/THBD/TNF/TNFRSF…
bta05414	KEGG	bta05414	Dilated cardiomyopathy	39/2308	67/6118	0.000497136	0.00443392	0.00308324	39	ACTG1/ADCY6/ADCY7/ADCY9/ADRB1/AGT/ATP2A3/CACNA2D1/CACNB2/DAG1/GNAS/IGF1/ITGA2/ITGA2B/ITGA3/ITGA4/ITGA5/ITGA6/ITGA7/ITGA9/ITGAV/ITGB1/ITGB3/ITGB4/ITGB7/ITGB8/LMNA/PRKACA/PRKACB/SGCA/SGCD/SLC8A1/SLC8A3/TGFB2/TGFB3/TNF/TNNT2/TPM1/TPM4
bta05206	KEGG	bta05206	MicroRNAs in cancer	76/2308	149/6118	0.000568746	0.00486108	0.00338028	76	ABCC1/ABL1/APC/BCL2/BMF/BMPR2/CASP3/CCNG1/CD44/CDC25B/CDCA5/CDK6/CDKN1A/CREBBP/CRK/DNMT1/DNMT3A/E2F1/E2F3/EFNA1/EFNA2/EFNA4/EFNA5/ERBB2/ERBB3/EZH2/EZR/FOXP1/FSCN1/GLS/GLS2/GRB2/HDAC1/HDAC2/ITGA5/ITGB3/KRAS/MAP2K1/MAP2K2/MAPK1/MAPK7/MDM4/MET/PAK4/PDCD4/PDGFB/PDGFRA/PIK3CB/PIK3CD/PIK3R1/PIK3R2/PIK3R3/PLCG1/PRKCA/PRKCE/PTEN/RAF1/RDX/RECK/RHOA/RPS6KA5/RPTOR/SERPINB5/SHC4/SPRY2/ST14/STAT3/STMN1/TGFB2/…
bta05235	KEGG	bta05235	PD-L1 expression and PD-1 checkpoint pathway in cancer	50/2308	91/6118	0.000574492	0.00486108	0.00338028	50	AKT1/AKT2/AKT3/BATF/BATF3/CD247/CD3D/CD3G/CSNK2A1/HIF1A/IFNGR1/JAK1/KRAS/LAT/LCK/MAP2K1/MAP2K2/MAP2K3/MAP2K6/MAPK1/MAPK13/MAPK14/NFATC1/NFATC3/NFKBIB/PDCD1/PIK3CB/PIK3CD/PIK3R1/PIK3R2/PIK3R3/PLCG1/PPP3CA/PPP3CB/PPP3CC/PPP3R1/PRKCQ/PTEN/PTPN6/RAF1/RASGRP1/RPS6KB1/STAT1/STAT3/TICAM2/TIRAP/TLR2/TLR9/TRAF6/ZAP70
bta05135	KEGG	bta05135	Yersinia infection	71/2308	138/6118	0.000622497	0.00505031	0.00351186	71	ACTG1/ACTR2/ACTR3/AKT1/AKT2/AKT3/ARHGEF12/ARHGEF28/ARHGEF7/ARPC1B/ARPC5/ARPC5L/BAIAP2/BCAR1/CCL2/CRK/ELMO1/ELMO2/FCGR2A/FYB1/GIT2/GNAQ/GSK3B/IL10/IL18/ITGA4/ITGA5/ITGB1/LAT/LCK/LCP2/MAP2K1/MAP2K2/MAP2K3/MAP2K4/MAP2K6/MAPK1/MAPK13/MAPK14/MAPK9/NFATC1/NFATC3/NLRP3/PIK3CB/PIK3CD/PIK3R1/PIK3R2/PIK3R3/PIP5K1A/PIP5K1C/PKN1/PKN2/PLCG1/PTK2/PTK2B/RAC1/RAC2/RAC3/RHOA/RHOG/ROCK2/RPS6KA1/RPS6KA2/TAB1/TNF/TR…
bta05160	KEGG	bta05160	Hepatitis C	67/2308	129/6118	0.000627462	0.00505031	0.00351186	67	AKT1/AKT2/AKT3/BAD/BID/CASP3/CASP8/CD81/CDK6/CDKN1A/CLDN11/CLDN19/CLDN3/CLDN4/CLDN7/CLDN8/CTNNB1/CYCS/E2F1/E2F3/EIF2AK3/FADD/FAS/GRB2/GSK3B/IFNAR1/IFNAR2/IKBKE/IRF7/IRF9/JAK1/KRAS/LDLR/MAP2K1/MAP2K2/MAPK1/MAVS/MX2/OAS1X/OAS2/OCLN/PIAS1/PIK3CB/PIK3CD/PIK3R1/PIK3R2/PIK3R3/PPARA/PPP2CA/PPP2CB/PPP2R1A/RAF1/RB1/RXRA/SCARB1/SOCS3/STAT1/STAT3/TNF/TNFRSF1A/TRAF3/TRAF6/YWHAB/YWHAE/YWHAG/YWHAH/YWHAZ
bta04520	KEGG	bta04520	Adherens junction	40/2308	70/6118	0.000708875	0.00556973	0.00387305	40	ACP1/ACTG1/ACTN1/ACTN4/BAIAP2/CREBBP/CSNK2A1/CTNNA1/CTNNB1/CTNND1/ERBB2/FER/FGFR1/FYN/IGF1R/MAPK1/MET/NECTIN1/NECTIN2/NECTIN4/NLK/PTPN1/PTPN6/PTPRF/RAC1/RAC2/RAC3/RHOA/SMAD3/SORBS1/SSX2IP/TCF7/TGFBR1/TGFBR2/VCL/WASF1/WASF2/WASF3/WASL/YES1
bta04724	KEGG	bta04724	Glutamatergic synapse	45/2308	81/6118	0.000777916	0.00597005	0.00415142	45	ADCY6/ADCY7/ADCY9/CACNA1A/DLG4/DLGAP1/GLS/GLS2/GNAI1/GNAI2/GNAI3/GNAQ/GNAS/GNB1/GNG11/GNG12/GNG2/GNG4/GNG7/GNGT2/GRIK4/GRIK5/GRK2/GRK3/HOMER1/HOMER2/ITPR2/ITPR3/MAPK1/PLA2G4A/PLA2G4F/PLCB1/PLCB2/PLCB3/PLCB4/PLD1/PPP3CA/PPP3CB/PPP3CC/PPP3R1/PRKACA/PRKACB/PRKCA/SLC1A1/SLC38A3
bta04660	KEGG	bta04660	T cell receptor signaling pathway	54/2308	101/6118	0.000851122	0.00638341	0.00443886	54	AKT1/AKT2/AKT3/CARD11/CD247/CD3D/CD3G/CTLA4/FYN/GRAP2/GRB2/GSK3B/ICOS/IL10/ITK/KRAS/LAT/LCK/LCP2/MAP2K1/MAP2K2/MAP3K14/MAPK1/MAPK13/MAPK14/MAPK9/NCK1/NCK2/NFATC1/NFATC3/NFKBIB/PAK1/PAK2/PAK4/PDCD1/PIK3CB/PIK3CD/PIK3R1/PIK3R2/PIK3R3/PLCG1/PPP3CA/PPP3CB/PPP3CC/PPP3R1/PRKCQ/PTPN6/PTPRC/RAF1/RASGRP1/RHOA/TNF/VAV1/ZAP70
bta04725	KEGG	bta04725	Cholinergic synapse	47/2308	86/6118	0.000972196	0.00712944	0.00495763	47	ADCY6/ADCY7/ADCY9/AKT1/AKT2/AKT3/BCL2/CACNA1A/CAMK2A/CHRM3/CREB3L1/CREB3L2/CREB5/FYN/GNA11/GNAI1/GNAI2/GNAI3/GNAQ/GNB1/GNG11/GNG12/GNG2/GNG4/GNG7/GNGT2/ITPR2/ITPR3/KCNJ12/KCNJ2/KCNQ1/KRAS/MAP2K1/MAPK1/PIK3CB/PIK3CD/PIK3R1/PIK3R2/PIK3R3/PIK3R6/PLCB1/PLCB2/PLCB3/PLCB4/PRKACA/PRKACB/PRKCA
bta04062	KEGG	bta04062	Chemokine signaling pathway	83/2308	168/6118	0.00115555	0.00828982	0.00576453	83	ADCY6/ADCY7/ADCY9/AKT1/AKT2/AKT3/ARRB1/BAD/BCAR1/CCL2/CCL28/CCL3/CCR1/CCR4/CCR6/CCR7/CCR9/CRK/CX3CR1/CXCL12/CXCR1/CXCR2/CXCR6/ELMO1/FGR/FOXO3/GNAI1/GNAI2/GNAI3/GNAQ/GNB1/GNG11/GNG12/GNG2/GNG4/GNG7/GNGT2/GRB2/GRK2/GRK3/GRK5/GSK3B/HCK/ITK/KRAS/LOC508666/LYN/MAP2K1/MAPK1/NCF1/NFKBIB/PAK1/PIK3CB/PIK3CD/PIK3R1/PIK3R2/PIK3R3/PIK3R6/PLCB1/PLCB2/PLCB3/PLCB4/PLCG1/PRKACA/PRKACB/PRKCD/PRKCZ/PTK2/PTK2B/RAC1…
bta04140	KEGG	bta04140	Autophagy - animal	69/2308	136/6118	0.00120687	0.00847376	0.00589244	69	AKT1/AKT1S1/AKT2/AKT3/AMBRA1/ATG101/ATG13/ATG2B/ATG4B/ATG4C/ATG5/BAD/BCL2/BNIP3/CTSB/DAPK3/DEPTOR/EIF2AK3/GABARAP/HIF1A/IGF1R/KRAS/LAMP1/LOC534155/MAP1LC3B/MAP2K1/MAP2K2/MAPK1/MAPK9/MRAS/MTMR3/MTMR4/NRBF2/PIK3CB/PIK3CD/PIK3R1/PIK3R2/PIK3R3/PPP2CA/PPP2CB/PRKAA2/PRKACA/PRKACB/PRKCD/PRKCQ/PTEN/RAB1A/RAB33B/RAB7A/RAB7B/RAB8A/RAF1/RHEB/RPS6KB1/RPTOR/RRAGC/RRAGD/RRAS2/RUBCN/SH3GLB1/SNAP29/SUPT20H/TANK/…
bta04923	KEGG	bta04923	Regulation of lipolysis in adipocytes	25/2308	40/6118	0.0012483	0.00858204	0.00596773	25	ABHD5/ADCY6/ADCY7/ADCY9/ADRB1/AKT1/AKT2/AKT3/GNAI1/GNAI2/GNAI3/GNAS/LIPE/LOC618367/PIK3CB/PIK3CD/PIK3R1/PIK3R2/PIK3R3/PNPLA2/PRKACA/PRKACB/PRKG1/PRKG2/PTGER3
bta04933	KEGG	bta04933	AGE-RAGE signaling pathway in diabetic complications	47/2308	87/6118	0.00135147	0.00910174	0.00632912	47	AGT/AKT1/AKT2/AKT3/BCL2/CASP3/CCL2/COL4A1/EDN1/KRAS/MAPK1/MAPK13/MAPK14/MAPK9/NFATC1/PIK3CB/PIK3CD/PIK3R1/PIK3R2/PIK3R3/PLCB1/PLCB2/PLCB3/PLCB4/PLCD1/PLCD3/PLCE1/PLCG1/PRKCA/PRKCD/PRKCE/PRKCZ/RAC1/SERPINE1/SMAD2/SMAD3/STAT1/STAT3/STAT5B/TGFB2/TGFB3/TGFBR1/TGFBR2/THBD/TNF/VEGFA/VEGFC
bta04728	KEGG	bta04728	Dopaminergic synapse	55/2308	105/6118	0.00144514	0.00953793	0.00663244	55	AKT1/AKT2/AKT3/ARRB1/ATF2/ATF6B/CACNA1A/CALM2/CALM3/CAMK2A/COMT/CREB3L1/CREB3L2/CREB5/GNAI1/GNAI2/GNAI3/GNAQ/GNAS/GNB1/GNG11/GNG12/GNG2/GNG4/GNG7/GNGT2/GSK3B/ITPR2/ITPR3/KIF5B/KIF5C/MAOA/MAPK13/MAPK14/MAPK9/PLCB1/PLCB2/PLCB3/PLCB4/PPP1CA/PPP1CC/PPP2CA/PPP2CB/PPP2R1A/PPP2R5A/PPP2R5C/PPP2R5D/PPP3CA/PPP3CB/PPP3CC/PRKACA/PRKACB/PRKCA/TH/TOMT
bta04070	KEGG	bta04070	Phosphatidylinositol signaling system	49/2308	92/6118	0.00162047	0.0104854	0.00729129	49	CALM2/CALM3/CDS2/DGKA/DGKD/DGKZ/IMPA1/IMPA2/INPP1/INPP5D/INPP5E/INPPL1/IP6K1/IP6K2/IP6K3/IPMK/ITPK1/ITPKA/ITPKC/ITPR2/ITPR3/MTM1/MTMR2/MTMR3/MTMR4/PI4K2A/PI4KA/PI4KB/PIK3CB/PIK3CD/PIK3R1/PIK3R2/PIK3R3/PIP4K2A/PIP4K2B/PIP5K1A/PIP5K1C/PLCB1/PLCB2/PLCB3/PLCB4/PLCD1/PLCD3/PLCE1/PLCG1/PPIP5K2/PRKCA/PTEN/SYNJ1
bta04722	KEGG	bta04722	Neurotrophin signaling pathway	57/2308	110/6118	0.00166592	0.0105722	0.00735164	57	ABL1/AKT1/AKT2/AKT3/ARHGDIA/ARHGDIB/BAD/BCL2/CALM2/CALM3/CAMK2A/CRK/FOXO3/GAB1/GRB2/GSK3B/IRAK2/IRAK3/KRAS/MAP2K1/MAP2K2/MAP2K5/MAP3K1/MAP3K5/MAPK1/MAPK13/MAPK14/MAPK7/MAPK9/MATK/NFKBIB/NGFR/NTRK2/PIK3CB/PIK3CD/PIK3R1/PIK3R2/PIK3R3/PLCG1/PRKCD/PSEN1/PSEN2/RAC1/RAF1/RAP1A/RAP1B/RAPGEF1/RHOA/RIPK2/RPS6KA1/RPS6KA2/RPS6KA5/SH2B1/SH2B3/SHC4/TRAF6/YWHAE
bta00600	KEGG	bta00600	Sphingolipid metabolism	28/2308	47/6118	0.00186878	0.0116358	0.00809124	28	ACER2/ACER3/ARSA/ASAH1/B4GALT6/CERS2/CERS5/CERS6/DEGS1/DEGS2/GALC/GBA/GLB1/HEXA/KDSR/NEU3/PLPP1/PLPP2/PLPP3/PSAP/SGMS1/SGPL1/SGPP1/SMPD3/SPTLC1/SPTLC2/UGCG/UGT8
bta01521	KEGG	bta01521	EGFR tyrosine kinase inhibitor resistance	41/2308	75/6118	0.0019912	0.0120259	0.00836249	41	AKT1/AKT2/AKT3/BAD/BCL2/EIF4E/EIF4EBP1/ERBB2/ERBB3/FGF2/FOXO3/GAB1/GRB2/GSK3B/IGF1/IGF1R/IL6R/JAK1/KRAS/MAP2K1/MAP2K2/MAPK1/MET/NF1/NRG1/PDGFB/PDGFD/PDGFRA/PIK3CB/PIK3CD/PIK3R1/PIK3R2/PIK3R3/PLCG1/PRKCA/PTEN/RAF1/RPS6KB1/SHC4/STAT3/VEGFA
bta04911	KEGG	bta04911	Insulin secretion	35/2308	62/6118	0.00200431	0.0120259	0.00836249	35	ADCY6/ADCY7/ADCY9/ADCYAP1R1/ATF2/ATF6B/ATP1A1/ATP1B1/ATP1B3/CAMK2A/CHRM3/CREB3L1/CREB3L2/CREB5/GCK/GNA11/GNAQ/GNAS/ITPR3/KCNMA1/KCNMB1/KCNMB4/KCNN4/PLCB1/PLCB2/PLCB3/PLCB4/PRKACA/PRKACB/PRKCA/RAPGEF4/SLC2A1/SNAP25/STX1A/VAMP2
bta04973	KEGG	bta04973	Carbohydrate digestion and absorption	20/2308	31/6118	0.0022031	0.0128243	0.00891773	20	AKT1/AKT2/AKT3/ATP1A1/ATP1B1/ATP1B3/G6PC3/HK1/HKDC1/PIK3CB/PIK3CD/PIK3R1/PIK3R2/PIK3R3/PLCB1/PLCB2/PLCB3/PLCB4/SLC37A4/SLC5A1
bta04910	KEGG	bta04910	Insulin signaling pathway	64/2308	127/6118	0.00221511	0.0128243	0.00891773	64	ACACA/ACACB/AKT1/AKT2/AKT3/BAD/CALM2/CALM3/CRK/EIF4E/EIF4EBP1/FASN/FBP1/FLOT2/G6PC3/GCK/GRB2/GSK3B/HK1/HKDC1/INPPL1/KRAS/LIPE/MAP2K1/MAP2K2/MAPK1/MAPK9/MKNK1/MKNK2/PHKG1/PIK3CB/PIK3CD/PIK3R1/PIK3R2/PIK3R3/PPARGC1A/PPP1CA/PPP1CC/PPP1R3B/PPP1R3F/PRKAA2/PRKAB1/PRKACA/PRKACB/PRKAR1A/PRKAR1B/PRKAR2A/PRKAR2B/PRKCI/PRKCZ/PTPN1/PTPRF/PYGB/PYGL/RAF1/RAPGEF1/RHEB/RPS6KB1/RPTOR/SHC4/SLC2A4/SOCS3/SORBS1/SREB…
bta04370	KEGG	bta04370	VEGF signaling pathway	31/2308	54/6118	0.00249028	0.0140219	0.00975045	31	AKT1/AKT2/AKT3/BAD/HSPB1/KRAS/MAP2K1/MAP2K2/MAPK1/MAPK13/MAPK14/PIK3CB/PIK3CD/PIK3R1/PIK3R2/PIK3R3/PLA2G4A/PLA2G4F/PLCG1/PPP3CA/PPP3CB/PPP3CC/PPP3R1/PRKCA/PTK2/RAC1/RAC2/RAC3/RAF1/SH2D2A/VEGFA
bta05231	KEGG	bta05231	Choline metabolism in cancer	47/2308	89/6118	0.0025134	0.0140219	0.00975045	47	AKT1/AKT2/AKT3/CHPT1/DGKA/DGKD/DGKZ/EIF4EBP1/GRB2/HIF1A/KRAS/MAP2K1/MAP2K2/MAPK1/MAPK9/PDGFB/PDGFD/PDGFRA/PIK3CB/PIK3CD/PIK3R1/PIK3R2/PIK3R3/PIP5K1A/PIP5K1C/PLA2G4A/PLA2G4F/PLCG1/PLD1/PLPP1/PLPP2/PLPP3/PRKCA/RAC1/RAC2/RAC3/RAF1/RALGDS/RHEB/RPS6KB1/SLC22A1/SLC22A4/SLC22A5/SLC44A4/WASF1/WASF2/WASF3
bta00562	KEGG	bta00562	Inositol phosphate metabolism	37/2308	67/6118	0.00256045	0.0140219	0.00975045	37	ALDH6A1/FIG4/IMPA1/IMPA2/INPP1/INPP5D/INPP5E/INPP5K/INPPL1/IPMK/ISYNA1/ITPK1/ITPKA/ITPKC/MTM1/MTMR2/MTMR3/MTMR4/PI4K2A/PI4KA/PI4KB/PIK3CB/PIK3CD/PIP4K2A/PIP4K2B/PIP5K1A/PIP5K1C/PLCB1/PLCB2/PLCB3/PLCB4/PLCD1/PLCD3/PLCE1/PLCG1/PTEN/SYNJ1
bta04012	KEGG	bta04012	ErbB signaling pathway	42/2308	78/6118	0.00259192	0.0140219	0.00975045	42	ABL1/ABL2/AKT1/AKT2/AKT3/BAD/BTC/CAMK2A/CDKN1A/CRK/EIF4EBP1/ERBB2/ERBB3/GAB1/GRB2/GSK3B/HBEGF/KRAS/MAP2K1/MAP2K2/MAP2K4/MAPK1/MAPK9/NCK1/NCK2/NRG1/NRG3/PAK1/PAK2/PAK4/PIK3CB/PIK3CD/PIK3R1/PIK3R2/PIK3R3/PLCG1/PRKCA/PTK2/RAF1/RPS6KB1/SHC4/STAT5B
bta04927	KEGG	bta04927	Cortisol synthesis and secretion	28/2308	48/6118	0.00288873	0.0153163	0.0106506	28	ADCY6/ADCY7/ADCY9/AGT/ATF2/ATF6B/CACNA1G/CREB3L1/CREB3L2/CREB5/CYP11A1/GNA11/GNAQ/GNAS/ITPR2/ITPR3/LDLR/NCEH1/NR4A1/ORAI1/PDE8A/PLCB1/PLCB2/PLCB3/PLCB4/PRKACA/PRKACB/SCARB1
bta04066	KEGG	bta04066	HIF-1 signaling pathway	49/2308	94/6118	0.00292402	0.0153163	0.0106506	49	AKT1/AKT2/AKT3/ANGPT4/ARNT/BCL2/CAMK2A/CDKN1A/CREBBP/EDN1/EGLN1/EGLN2/EGLN3/EIF4E/EIF4EBP1/ENO4/ERBB2/FLT1/HIF1A/HK1/HKDC1/IFNGR1/IGF1/IGF1R/IL6R/MAP2K1/MAP2K2/MAPK1/MKNK1/MKNK2/NOS2/PDK1/PFKFB3/PFKL/PFKP/PIK3CB/PIK3CD/PIK3R1/PIK3R2/PIK3R3/PLCG1/PRKCA/RPS6KB1/SERPINE1/SLC2A1/STAT3/TEK/TFRC/VEGFA
bta04020	KEGG	bta04020	Calcium signaling pathway	86/2308	181/6118	0.00400691	0.0206606	0.0143669	86	ADCY7/ADCY9/ADORA2B/ADRA1A/ADRA1B/ADRB1/ASPH/ATP2A3/ATP2B1/ATP2B2/ATP2B4/CACNA1A/CACNA1E/CACNA1G/CALM2/CALM3/CAMK1/CAMK1G/CAMK2A/CD38/CHRM3/CYSLTR1/EDNRB/ERBB2/ERBB3/F2R/FGF1/FGF2/FGFR1/FLT1/GDNF/GNA11/GNA15/GNAQ/GNAS/HRH1/HTR4/ITPKA/ITPKC/ITPR2/ITPR3/MCU/MET/MYLK/NOS2/NTRK2/ORAI1/ORAI2/P2RX1/P2RX4/P2RX7/PDE1A/PDGFB/PDGFD/PDGFRA/PHKG1/PLCB1/PLCB2/PLCB3/PLCB4/PLCD1/PLCD3/PLCE1/PLCG1/PPIF/PPP3CA/PP…
bta05200	KEGG	bta05200	Pathways in cancer	190/2308	434/6118	0.00427411	0.0216993	0.0150892	190	ABL1/ADCY6/ADCY7/ADCY9/AGT/AKT1/AKT2/AKT3/APC/APPL1/ARHGEF12/ARNT/ARNT2/AXIN1/AXIN2/BAD/BCL2/BID/CALM2/CALM3/CAMK2A/CASP3/CASP8/CDK6/CDKN1A/CKS2/COL4A1/CREBBP/CRK/CSF2RB/CTBP2/CTNNA1/CTNNB1/CUL1/CXCL12/CYCS/DAPK3/DVL1/E2F1/E2F3/EDN1/EDNRB/EGLN1/EGLN2/EGLN3/EPAS1/ERBB2/ESR1/ETS1/F2R/FADD/FAS/FGF1/FGF2/FGFR1/FLT3LG/FZD1/FZD10/FZD7/GLI2/GNA11/GNA12/GNAI1/GNAI2/GNAI3/GNAQ/GNAS/GNB1/GNG11/GNG12/GNG2/G…
bta04931	KEGG	bta04931	Insulin resistance	51/2308	100/6118	0.0043707	0.0218535	0.0151964	51	ACACB/AGT/AKT1/AKT2/AKT3/CD36/CPT1A/CREB3L1/CREB3L2/CREB5/CRTC2/G6PC3/GFPT1/GSK3B/MAPK9/MLXIPL/PIK3CB/PIK3CD/PIK3R1/PIK3R2/PIK3R3/PPARA/PPARGC1A/PPP1CA/PPP1CC/PPP1R3B/PRKAA2/PRKAB1/PRKCD/PRKCE/PRKCQ/PRKCZ/PTEN/PTPA/PTPN1/PTPRF/PYGB/PYGL/RPS6KA1/RPS6KA2/RPS6KB1/SLC27A1/SLC2A1/SLC2A4/SOCS3/SREBF1/STAT3/TBC1D4/TNF/TNFRSF1A/TRIB3
bta04371	KEGG	bta04371	Apelin signaling pathway	57/2308	114/6118	0.00467802	0.0227938	0.0158502	57	ACTA2/ADCY6/ADCY7/ADCY9/AKT1/AKT2/AKT3/CALM2/CALM3/GNAI1/GNAI2/GNAI3/GNAQ/GNB1/GNG11/GNG12/GNG2/GNG4/GNG7/GNGT2/ITPR2/ITPR3/KRAS/LIPE/MAP1LC3B/MAP2K1/MAP2K2/MAPK1/MEF2A/MEF2C/MEF2D/MRAS/MYLK/NOS2/NRF1/PIK3R6/PLAT/PLCB1/PLCB2/PLCB3/PLCB4/PPARGC1A/PRKAA2/PRKAB1/PRKACA/PRKACB/PRKCE/RAF1/RPS6KB1/RRAS2/SERPINE1/SLC8A1/SLC8A3/SLC9A1/SMAD2/SMAD3/TGFBR1
bta05142	KEGG	bta05142	Chagas disease	50/2308	98/6118	0.00469691	0.0227938	0.0158502	50	AKT1/AKT2/AKT3/C3/CASP8/CCL2/CCL3/CD247/CD3D/CD3G/FADD/FAS/GNA11/GNA15/GNAI1/GNAI2/GNAI3/GNAQ/GNAS/IFNGR1/IL10/MAP2K4/MAPK1/MAPK13/MAPK14/MAPK9/NOS2/PIK3CB/PIK3CD/PIK3R1/PIK3R2/PIK3R3/PLCB1/PLCB2/PLCB3/PLCB4/PPP2CA/PPP2CB/PPP2R1A/SERPINE1/SMAD2/TGFB2/TGFB3/TGFBR1/TGFBR2/TLR2/TLR9/TNF/TNFRSF1A/TRAF6
bta00061	KEGG	bta00061	Fatty acid biosynthesis	11/2308	15/6118	0.00552291	0.0264139	0.0183676	11	ACACA/ACACB/ACSBG1/ACSL1/ACSL3/ACSL5/ACSL6/FASN/MCAT/MECR/OXSM
bta04540	KEGG	bta04540	Gap junction	39/2308	74/6118	0.00590701	0.0278474	0.0193643	39	ADCY6/ADCY7/ADCY9/ADRB1/CSNK1D/GNA11/GNAI1/GNAI2/GNAI3/GNAQ/GNAS/GRB2/GUCY1A1/ITPR2/ITPR3/KRAS/LPAR1/MAP2K1/MAP2K2/MAP2K5/MAPK1/MAPK7/PDGFB/PDGFD/PDGFRA/PLCB1/PLCB2/PLCB3/PLCB4/PRKACA/PRKACB/PRKCA/PRKG1/PRKG2/RAF1/TUBA8/TUBB/TUBB4B/TUBB6
bta05152	KEGG	bta05152	Tuberculosis	74/2308	155/6118	0.00629461	0.0292566	0.0203443	74	AKT1/AKT2/AKT3/ARHGEF12/ATP6V0A2/ATP6V0B/ATP6V0C/ATP6V0D1/BAD/BCL2/BID/BOLA-DMA/BOLA-DMB/BOLA-DOA/BOLA-DOB/BOLA-DRB3/C3/CALM2/CALM3/CAMK2A/CARD9/CASP3/CASP8/CD74/CEBPG/CORO1A/CREBBP/CYCS/CYP27B1/FADD/FCER1G/FCGR2A/FCGR2B/IFNGR1/IL10/IL18/IRAK2/ITGAM/ITGB2/JAK1/LAMP1/LBP/LSP1/MAPK1/MAPK13/MAPK14/MAPK9/NFYA/NFYC/NOD2/NOS2/PLA2R1/PPP3CA/PPP3CB/PPP3CC/PPP3R1/RAB5A/RAB5C/RAB7A/RAF1/RHOA/RIPK2/STAT1/SY…
bta04960	KEGG	bta04960	Aldosterone-regulated sodium reabsorption	18/2308	29/6118	0.00664025	0.0300537	0.0208986	18	ATP1A1/ATP1B1/ATP1B3/IGF1/KRAS/MAPK1/NR3C2/PIK3CB/PIK3CD/PIK3R1/PIK3R2/PIK3R3/PRKCA/SCNN1B/SCNN1G/SFN/SGK1/SLC9A3R2
bta04915	KEGG	bta04915	Estrogen signaling pathway	52/2308	104/6118	0.00672049	0.0300537	0.0208986	52	ADCY6/ADCY7/ADCY9/AKT1/AKT2/AKT3/ATF2/ATF6B/BCL2/CALM2/CALM3/CREB3L1/CREB3L2/CREB5/ESR1/FKBP5/GNAI1/GNAI2/GNAI3/GNAQ/GNAS/GRB2/HBEGF/HSP90AA1/HSP90AB1/ITPR2/ITPR3/KRAS/KRT14/KRT15/KRT17/KRT19/KRT23/MAP2K1/MAP2K2/MAPK1/NCOA1/PIK3CB/PIK3CD/PIK3R1/PIK3R2/PIK3R3/PLCB1/PLCB2/PLCB3/PLCB4/PRKACA/PRKACB/PRKCD/RAF1/RARA/SHC4
bta04922	KEGG	bta04922	Glucagon signaling pathway	45/2308	88/6118	0.00673931	0.0300537	0.0208986	45	ACACA/ACACB/AKT1/AKT2/AKT3/ATF2/CALM2/CALM3/CAMK2A/CPT1A/CREB3L1/CREB3L2/CREB5/CREBBP/CRTC2/FBP1/G6PC3/GCK/GNAQ/GNAS/ITPR2/ITPR3/PFKL/PFKP/PGAM1/PHKG1/PKM/PLCB1/PLCB2/PLCB3/PLCB4/PPARA/PPARGC1A/PPP3CA/PPP3CB/PPP3CC/PPP3R1/PPP4R3A/PRKAA2/PRKAB1/PRKACA/PRKACB/PYGB/PYGL/SLC2A1
bta04721	KEGG	bta04721	Synaptic vesicle cycle	32/2308	59/6118	0.00699264	0.0307676	0.021395	32	AP2A1/AP2A2/ATP6V0A2/ATP6V0B/ATP6V0C/ATP6V0D1/ATP6V0E1/ATP6V1A/ATP6V1B1/ATP6V1C1/ATP6V1F/CACNA1A/CLTA/CLTB/CLTC/DNM1/DNM2/DNM3/NAPA/NSF/SLC1A1/SLC6A2/SLC6A4/SLC6A9/SNAP25/STX1A/STX3/STXBP1/SYT1/TCIRG1/UNC13B/VAMP2
bta04978	KEGG	bta04978	Mineral absorption	25/2308	44/6118	0.00760096	0.0330042	0.0229503	25	ATOX1/ATP1A1/ATP1B1/ATP1B3/ATP2B1/ATP2B2/ATP2B4/CLCN2/CYBRD1/FTH1/HMOX2/MT1A/SLC11A2/SLC26A6/SLC31A1/SLC34A2/SLC40A1/SLC46A1/SLC5A1/SLC8A1/SLC8A3/SLC9A3/STEAP2/TRPV6/VDR
bta05210	KEGG	bta05210	Colorectal cancer	43/2308	84/6118	0.00779118	0.0330955	0.0230138	43	AKT1/AKT2/AKT3/APC/APPL1/AXIN1/AXIN2/BAD/BCL2/CASP3/CDKN1A/CTNNB1/CYCS/GRB2/GSK3B/KRAS/MAP2K1/MAP2K2/MAPK1/MAPK9/MLH1/MSH6/PIK3CB/PIK3CD/PIK3R1/PIK3R2/PIK3R3/RAC1/RAC2/RAC3/RAF1/RALA/RALB/RALGDS/RHOA/RPS6KB1/SMAD2/SMAD3/TCF7/TGFB2/TGFB3/TGFBR1/TGFBR2
bta05410	KEGG	bta05410	Hypertrophic cardiomyopathy	35/2308	66/6118	0.00782258	0.0330955	0.0230138	35	ACTG1/AGT/ATP2A3/CACNA2D1/CACNB2/DAG1/EDN1/IGF1/ITGA2/ITGA2B/ITGA3/ITGA4/ITGA5/ITGA6/ITGA7/ITGA9/ITGAV/ITGB1/ITGB3/ITGB4/ITGB7/ITGB8/LMNA/PRKAA2/PRKAB1/SGCA/SGCD/SLC8A1/SLC8A3/TGFB2/TGFB3/TNF/TNNT2/TPM1/TPM4
bta05212	KEGG	bta05212	Pancreatic cancer	38/2308	73/6118	0.0084904	0.035198	0.0244758	38	AKT1/AKT2/AKT3/BAD/CDK6/CDKN1A/E2F1/E2F3/ERBB2/JAK1/KRAS/MAP2K1/MAPK1/MAPK9/PIK3CB/PIK3CD/PIK3R1/PIK3R2/PIK3R3/PLD1/RAC1/RAC2/RAC3/RAF1/RALA/RALB/RALGDS/RB1/RPS6KB1/SMAD2/SMAD3/STAT1/STAT3/TGFB2/TGFB3/TGFBR1/TGFBR2/VEGFA
bta01212	KEGG	bta01212	Fatty acid metabolism	29/2308	53/6118	0.00853566	0.035198	0.0244758	29	ACAA2/ACACA/ACADSB/ACAT1/ACSBG1/ACSL1/ACSL3/ACSL5/ACSL6/CPT1A/CPT2/ECHS1/EHHADH/ELOVL4/ELOVL5/ELOVL7/FADS2/FASN/HACD2/HADH/HSD17B12/HSD17B4/MCAT/MECR/OXSM/PPT1/SCD5/SCP2/TECR
bta04380	KEGG	bta04380	Osteoclast differentiation	58/2308	119/6118	0.00863951	0.035198	0.0244758	58	ACP5/AKT1/AKT2/AKT3/BLNK/CSF1/CYBA/CYLD/FCGR2A/FCGR2B/FHL2/FOSL2/FYN/GRB2/IFNAR1/IFNAR2/IFNGR1/IRF9/ITGB3/JAK1/JUND/LCK/LCP2/LILRA4/MAP2K1/MAP2K6/MAP3K14/MAPK1/MAPK13/MAPK14/MAPK9/NCF1/NCF2/NCF4/NFATC1/PIK3CB/PIK3CD/PIK3R1/PIK3R2/PIK3R3/PPP3CA/PPP3CB/PPP3CC/PPP3R1/RAC1/SIRPB1/SOCS3/SPI1/STAT1/SYK/TAB1/TGFB2/TGFBR1/TGFBR2/TNF/TNFRSF1A/TRAF6/TYROBP
bta05412	KEGG	bta05412	Arrhythmogenic right ventricular cardiomyopathy	32/2308	60/6118	0.0096524	0.038845	0.0270118	32	ACTG1/ATP2A3/CACNA2D1/CACNB2/CDH2/CTNNA1/CTNNB1/DAG1/DSC2/DSG2/DSP/ITGA2/ITGA2B/ITGA3/ITGA4/ITGA5/ITGA6/ITGA7/ITGA9/ITGAV/ITGB1/ITGB3/ITGB4/ITGB7/ITGB8/LMNA/PKP2/SGCA/SGCD/SLC8A1/SLC8A3/TCF7
bta04912	KEGG	bta04912	GnRH signaling pathway	39/2308	76/6118	0.0104263	0.0414538	0.0288259	39	ADCY6/ADCY7/ADCY9/CALM2/CALM3/CAMK2A/GNA11/GNAQ/GNAS/GRB2/HBEGF/ITPR2/ITPR3/KRAS/MAP2K1/MAP2K2/MAP2K3/MAP2K4/MAP2K6/MAP3K1/MAPK1/MAPK13/MAPK14/MAPK7/MAPK9/MMP14/PLA2G4A/PLA2G4F/PLCB1/PLCB2/PLCB3/PLCB4/PLD1/PRKACA/PRKACB/PRKCA/PRKCD/PTK2B/RAF1
bta04142	KEGG	bta04142	Lysosome	61/2308	127/6118	0.0106003	0.0416442	0.0289583	61	ACP5/AGA/AP1B1/AP1G1/AP1M1/AP1S1/AP1S3/AP3D1/AP3M1/AP3S1/AP4B1/AP4S1/ARSA/ARSB/ARSG/ASAH1/ATP6V0A2/ATP6V0B/ATP6V0C/ATP6V0D1/CLTA/CLTB/CLTC/CTNS/CTSB/CTSF/ENTPD4/GALC/GALNS/GBA/GGA1/GGA3/GLB1/GM2A/GNPTAB/GNPTG/GNS/HEXA/HYAL2/IGF2R/LAMP1/LAMP3/LAPTM4A/LAPTM4B/LAPTM5/LGMN/LITAF/MFSD8/NAGLU/NPC1/PLA2G15/PPT1/PSAP/SCARB2/SGSH/SLC11A1/SLC11A2/SLC17A5/TCIRG1/TPP1/WDR7
bta01210	KEGG	bta01210	2-Oxocarboxylic acid metabolism	11/2308	16/6118	0.0116753	0.0453276	0.0315196	11	ACO1/ACO2/ACY1/BCAT1/CS/GOT1/GOT2/GPT/GPT2/IDH2/IDH3A
bta05218	KEGG	bta05218	Melanoma	29/2308	54/6118	0.0119014	0.0456683	0.0317566	29	AKT1/AKT2/AKT3/BAD/CDK6/CDKN1A/E2F1/E2F3/FGF1/FGF2/FGFR1/IGF1/IGF1R/KRAS/MAP2K1/MAP2K2/MAPK1/MET/PDGFB/PDGFD/PDGFRA/PIK3CB/PIK3CD/PIK3R1/PIK3R2/PIK3R3/PTEN/RAF1/RB1
