# Supplementary material for: Genome-Wide DNA Methylation and Transcriptome Integration Associates DNA Methylation Changes with Bovine Subclinical Mastitis Caused by Staphylococcus chromogenes
Source: Int J Mol Sci. 2023 Jun 20;24(12):10369. doi: 10.3390/ijms241210369 (PMC10299661; doi:10.3390/ijms241210369)
Supplement: Supplementary file 1 [file ijms-24-10369-s001.zip › TableS8 List of differentially methylated methylation haplotype blocks.csv]

Table S8 TList of differentially methylated methylation haplotype blocks
	ID	chr_NC	start	end	chr	name	dmc_num	type	width	promoter_symbol	gene_symbol	TSS_symbol	5UTR_symbol	3UTR_symbol	downstream_symbol	PI8CT	SR27CT	SR51CT	SR52CT	ME39q2SC	MK2356q4SC	PI6908q2SC	SR65q2SC	diff	pvalue	var	padj_ihw	padj_BH	padj_ihw0.2	padj_BH0.2
1	NC_037328.1:100082170:100082233	NC_037328.1	100082170	100082233	chr1	chr1:100082170:100082233	NA	CpG-shores;inter	64	NA	NA	NA	NA	NA	NA	0.510416666666667	0.341033966033966	0.356327777012444	0.302620802620803	0.68818620992534	0.677172364672365	0.610827742548173	0.503411306042885	0.242299602713721	0.00819887784127156	0.0234378537342908	0.0325311417831996	0.0584306853886641	0.0230412548735627	0.0260917136486951
2	NC_037328.1:100283343:100283386	NC_037328.1	100283343	100283386	chr1	chr1:100283343:100283386	NA	CpG-deserts;inter	44	NA	NA	NA	NA	NA	NA	0.678792838367306	0.319753086419753	0.374620829120324	0.464102564102564	0.985532407407407	0.967571644042232	0.807692307692308	0.678571428571429	0.400524617425857	0.0097846766179023	0.0655237680153817	0.0322975735071344	0.0624797287102492	0.0294825507862636	0.027987130942543
3	NC_037328.1:100284048:100284087	NC_037328.1	100284048	100284087	chr1	chr1:100284048:100284087	1	repeats;CpG-deserts;inter	40	NA	NA	NA	NA	NA	NA	0.373528993640105	0.363631436314363	0.29650630672979	0.538137687716965	0.858289031828551	0.642916364349446	0.711845711685919	0.659572006940428	0.32520467260078	0.00377468806346343	0.0388434194031699	0.0229193277184572	0.0455930262570153	0.0195012825956536	0.0201453423787268
4	NC_037328.1:101465558:101465626	NC_037328.1	101465558	101465626	chr1	chr1:101465558:101465626	6	repeats;CpG-deserts;inter	69	NA	NA	NA	NA	NA	NA	0.428316498316498	0.338808722142055	0.291139232525	0.249032635517917	0.713455718736093	0.653759512937595	0.615791060510226	0.679101125250383	0.338702582233207	0.00083200364801036	0.0360430992291814	0.0162664721561718	0.0326560990879149	0.0143449387248355	0.0143103416054221
5	NC_037328.1:101522602:101522722	NC_037328.1	101522602	101522722	chr1	chr1:101522602:101522722	NA	promoters;CpG-deserts;inter	121	BCHE	NA	NA	NA	NA	NA	0.0987686239114811	0.212682285883485	0.18765376984127	0.355275567344533	0.427097615213557	0.680744092508798	0.895652173913044	0.600360971518467	0.437368651543274	0.012580789955496	0.0757072737249578	0.0354696526242943	0.0694011985244197	0.0328341283345044	0.0312325016563663
6	NC_037328.1:10170934:10171020	NC_037328.1	10170934	10171020	chr1	chr1:10170934:10171020	NA	CpG-deserts;inter	87	NA	NA	NA	NA	NA	NA	0.420026350461133	0.578174603174603	0.356150793650794	0.683333333333333	0.981894370651486	0.732539682539683	0.827542892156863	0.760802469135803	0.316273583465993	0.0162833799412288	0.0434006125974772	0.0407663458324172	0.0777911502071397	0.0328219041330815	0.035217666866796
7	NC_037328.1:1019246:1019344	NC_037328.1	1019246	1019344	chr1	chr1:1019246:1019344	NA	repeats;CpG-deserts;inter	99	NA	NA	NA	NA	NA	NA	0.263368983957219	0.500724637681159	0.0903814262023217	0.356125356125356	0.843635531135531	0.478778467908903	0.755411255411255	0.959058671824629	0.456570880578565	0.0148879653024397	0.0901902136485512	0.0400643104660178	0.0745679624987305	0.0365354334580241	0.0336975120321252
8	NC_037328.1:10251894:10251938	NC_037328.1	10251894	10251938	chr1	chr1:10251894:10251938	0	transcripts;first intron;CpG-deserts;genes	45	NA	APP	NA	NA	NA	NA	0.608558108558109	0.659939124992888	0.414737125184886	0.456392575245034	0.860051357300073	0.857142857142857	0.831682701377099	0.991228070175439	0.350119513003638	0.0039426689295549	0.0431936811717346	0.0229183697135805	0.0461075901775866	0.0200155318560743	0.020369855822619
9	NC_037328.1:10252096:10252167	NC_037328.1	10252096	10252167	chr1	chr1:10252096:10252167	4	transcripts;first intron;repeats;CpG-deserts;genes	72	NA	APP	NA	NA	NA	NA	0.637556861742908	0.523755588524729	0.515387258789321	0.359459036898061	0.995668679896463	0.84955533596838	0.889511653718091	0.980992467877714	0.419892347876407	0.001529759131999	0.0581122496253524	0.018151326835128	0.0363558096507684	0.0164185329081737	0.0159644166019383
10	NC_037328.1:10294630:10294693	NC_037328.1	10294630	10294693	chr1	chr1:10294630:10294693	NA	transcripts;first intron;CpG-deserts;genes	64	NA	APP	NA	NA	NA	NA	0.152852049910873	0.445421245421245	0.162222222222222	0.231684981684982	0.678188946261235	0.452913893930228	0.809782608695652	0.876391850272447	0.45627419998006	0.0090313706520205	0.0823776451641087	0.0321458951801561	0.060553935811337	0.0291358008697802	0.0270927839386319
11	NC_037328.1:10295252:10295268	NC_037328.1	10295252	10295268	chr1	chr1:10295252:10295268	NA	transcripts;first intron;CpG-deserts;genes	17	NA	APP	NA	NA	NA	NA	0.385435640558591	0.498484848484848	0.204678362573099	0.561820913251581	1	0.60047856309373	0.892526455026455	0.717641223155929	0.390056619101999	0.017022058619631	0.0675750444532539	0.0401810138974947	0.0795417760770804	0.038816062204046	0.0360507046053164
12	NC_037328.1:10310256:10310311	NC_037328.1	10310256	10310311	chr1	chr1:10310256:10310311	NA	transcripts;introns;repeats;CpG-deserts;genes	56	NA	APP	NA	NA	NA	NA	0.507846915892457	0.439606585105486	0.548440170940171	0.537592116388233	0.833491152558584	0.615998300913428	0.85994297308442	0.710216384253529	0.246540755620903	0.0155523146265094	0.0238934031815412	0.0436166882788224	0.0760550482345856	0.0292637962940651	0.0343899994574725
13	NC_037328.1:10359629:10359646	NC_037328.1	10359629	10359646	chr1	chr1:10359629:10359646	NA	transcripts;introns;repeats;CpG-deserts;genes	18	NA	APP	NA	NA	NA	NA	0.562121212121212	0.441818394024276	0.651322751322751	0.505555555555556	0.795522831289523	0.63312908496732	0.794701734324376	0.894789316261741	0.239331263454791	0.015072150868006	0.0247815400759811	0.0443358495600127	0.0749765205277463	0.0287738233457791	0.0338891672699444
14	NC_037328.1:10368370:10368381	NC_037328.1	10368370	10368381	chr1	chr1:10368370:10368381	NA	transcripts;introns;repeats;CpG-deserts;genes	12	NA	APP	NA	NA	NA	NA	0.859191905783795	0.747054075867635	0.6525	0.559309309309309	0.899771074602747	0.957713293650793	0.958404999426671	0.880270438781077	0.219526128875137	0.0364852085780315	0.021532544660694	0.113884670006256	0.11841781675496	0.0485044310516469	0.0551163774090559
15	NC_037328.1:10381682:10381738	NC_037328.1	10381682	10381738	chr1	chr1:10381682:10381738	8	transcripts;introns;CpG-deserts;genes	57	NA	APP	NA	NA	NA	NA	0.113426573426573	0.262861284567351	0.280493827160494	0.399514991181658	0.91095652173913	0.876838970117659	0.862218487799883	0.733794077676847	0.581877845249361	0.000347909538973768	0.105213890735272	0.0145482033889309	0.0282455218886904	0.0132391289384801	0.0123855499004737
16	NC_037328.1:10405964:10406039	NC_037328.1	10405964	10406039	chr1	chr1:10405964:10406039	2	transcripts;introns;CpG-deserts;genes	76	NA	APP	NA	NA	NA	NA	0.525813692480359	0.525868055555556	0.367808005003127	0.531649636912795	0.75599128540305	0.901992651215376	0.971644721644722	0.851907968574635	0.382599309221487	0.000774440109204924	0.0480942066536094	0.0162202108076625	0.0322028207710273	0.0142378066248887	0.0141135669970662
17	NC_037328.1:10428708:10428731	NC_037328.1	10428708	10428731	chr1	chr1:10428708:10428731	4	transcripts;introns;repeats;CpG-deserts;genes	24	NA	APP	NA	NA	NA	NA	0.594377735383234	0.639389137526143	0.464693204868154	0.532467532467533	0.904626762985896	0.739087301587302	0.949751861042183	0.83021978021978	0.298189523897524	0.00273550265654002	0.031518062955523	0.0215093418007596	0.041481910235972	0.0175466139431768	0.0182846879522374
18	NC_037328.1:10429769:10429835	NC_037328.1	10429769	10429835	chr1	chr1:10429769:10429835	NA	transcripts;introns;repeats;CpG-deserts;genes	67	NA	APP	NA	NA	NA	NA	0.697464285714286	0.571952160493827	0.431823172306897	0.41265350877193	0.937993103875457	0.746859083191851	0.91678431372549	0.742634624519584	0.30759449950636	0.012141529677398	0.039432066375983	0.0345477905945359	0.0683197074730831	0.0293851452072327	0.0307310862954569
19	NC_037328.1:10474632:10474707	NC_037328.1	10474632	10474707	chr1	chr1:10474632:10474707	4	transcripts;introns;CpG-deserts;genes	76	NA	APP	NA	NA	NA	NA	0.428571428571429	0.2	0.25	0.25	1	0.714285714285714	1	0.75	0.583928571428571	0.00133082616270093	0.112083637026239	0.0188750964654874	0.0353013658423764	0.0164503244932949	0.0155029681597288
20	NC_037328.1:10503379:10503450	NC_037328.1	10503379	10503450	chr1	chr1:10503379:10503450	NA	transcripts;introns;repeats;CpG-deserts;genes	72	NA	APP	NA	NA	NA	NA	0.2004329004329	0.461176470588235	0.10500547645126	0.414576802507837	0.87176861129067	0.508252076561936	0.986121212121212	0.860792540792541	0.511435697696532	0.00941341327333417	0.105501390587587	0.0329523461677125	0.0614949488599858	0.0299823942465994	0.0275219757960321
21	NC_037328.1:10519339:10519418	NC_037328.1	10519339	10519418	chr1	chr1:10519339:10519418	NA	transcripts;introns;CpG-deserts;genes	80	NA	APP	NA	NA	NA	NA	0.439484126984127	0.677056277056277	0.370493827160494	0.671292013567684	0.847530864197531	0.941037191037191	0.937124183006536	0.705555555555555	0.318230387257058	0.0192756030828382	0.0448432627248736	0.0442020648057566	0.0843406228858155	0.0355761579791182	0.038356000556982
22	NC_037328.1:10519461:10519495	NC_037328.1	10519461	10519495	chr1	chr1:10519461:10519495	3	transcripts;introns;CpG-deserts;genes	35	NA	APP	NA	NA	NA	NA	0.347222222222222	0.445833333333333	0	0.302279202279202	1	0.628282828282828	1	0.896514161220043	0.607365557917029	0.00351365447823146	0.134425447440731	0.026182804401296	0.0446817578898048	0.0222864678860683	0.0197329986569371
23	NC_037328.1:10520693:10520795	NC_037328.1	10520693	10520795	chr1	chr1:10520693:10520795	4	transcripts;introns;CpG-deserts;genes	103	NA	APP	NA	NA	NA	NA	0.331699346405229	0.308641975308642	0.233321170102779	0.641666666666667	0.978787878787879	0.886655728739404	0.946608946608947	0.913919413919414	0.552660702393082	0.00710533050532815	0.101865114768911	0.0288900937452962	0.0556309281565516	0.0267218725499559	0.0247579978196093
24	NC_037328.1:10522309:10522379	NC_037328.1	10522309	10522379	chr1	chr1:10522309:10522379	1	transcripts;introns;CpG-deserts;genes	71	NA	APP	NA	NA	NA	NA	0.31547619047619	0.261904761904762	0.378787878787879	0.188034188034188	1	0.733333333333333	0.844444444444444	0.622222222222222	0.513949245199245	0.0034461752159675	0.0894240930576432	0.0234572821863717	0.044446783500971	0.0208584151760133	0.0196286247727616
25	NC_037328.1:10522378:10522446	NC_037328.1	10522378	10522446	chr1	chr1:10522378:10522446	NA	transcripts;introns;CpG-deserts;genes	69	NA	APP	NA	NA	NA	NA	0.313582928699208	0.582142857142857	0.395367571025466	0.61193232055301	0.977735016420361	0.575293925194191	0.871518759018759	0.967268170426065	0.372197548409709	0.0218654964388774	0.0636663408645982	0.0463466827615012	0.0896785596331204	0.0443037589585995	0.0409406030019676
26	NC_037328.1:10532899:10532999	NC_037328.1	10532899	10532999	chr1	chr1:10532899:10532999	3	transcripts;introns;repeats;CpG-deserts;genes	101	NA	APP	NA	NA	NA	NA	0.488965744400527	0.394907407407407	0.26747311827957	0.404186795491143	0.908226495726496	0.655624568668047	0.996212121212121	0.766102677630192	0.442658199414552	0.00416803743846759	0.0693065694324415	0.0239186888366342	0.046819742190325	0.0218837933687275	0.0206923728797492
27	NC_037328.1:105664964:105664975	NC_037328.1	105664964	105664975	chr1	chr1:105664964:105664975	2	repeats;CpG-deserts;inter	12	NA	NA	NA	NA	NA	NA	0.618354241338112	0.478405377302436	0.342592592592593	0.524281274281274	0.919919786096257	0.728414595217277	0.91017316017316	0.982478632478633	0.394338172112728	0.002530218868658	0.0551984560837549	0.0199157709089661	0.0405960713378656	0.0181197801282584	0.0178951286508442
28	NC_037328.1:10572072:10572103	NC_037328.1	10572072	10572103	chr1	chr1:10572072:10572103	NA	repeats;CpG-deserts;inter	32	NA	NA	NA	NA	NA	NA	0.658201058201058	0.682256235827664	0.479042214257268	0.40630081300813	0.188513398190818	0.400694444444444	0.111337355455003	0.260662177328844	-0.316148236468753	0.0136472563027003	0.0428672653123212	0.0371146411581175	0.071867260959567	0.0308769799774663	0.0324056053673589
29	NC_037328.1:105784440:105784462	NC_037328.1	105784440	105784462	chr1	chr1:105784440:105784462	NA	repeats;CpG-deserts;inter	23	NA	NA	NA	NA	NA	NA	0.592647190208166	0.310708568434796	0.23121576565849	0.447631683561916	0.791743753322701	0.822462481383893	0.672843237243903	0.547455805064501	0.313075517287908	0.022803334612996	0.0455599593631039	0.0482261798853242	0.0915749424756688	0.0396845858084061	0.0418702299682383
30	NC_037328.1:10580179:10580246	NC_037328.1	10580179	10580246	chr1	chr1:10580179:10580246	1	CpG-deserts;inter	68	NA	NA	NA	NA	NA	NA	0.473361111111111	0.452192881745121	0.357449494949495	0.410860184119678	0.998924731182796	0.696925978848007	0.980253020611229	0.859202898550725	0.460360739316838	0.00406410750193827	0.0699685236061516	0.0240020787060547	0.046521429088728	0.0217534358353005	0.0205559777441015
31	NC_037328.1:105975469:105975550	NC_037328.1	105975469	105975550	chr1	chr1:105975469:105975550	NA	CpG-deserts;inter	82	NA	NA	NA	NA	NA	NA	0.495535714285714	0.388888888888889	0.168142968142968	0.465102707749767	0.757983682983683	0.549450549450549	0.68474358974359	0.764619883040936	0.309781856537855	0.01636194917614	0.0410643927339451	0.0386796232700035	0.0779592318341277	0.0341855718102515	0.0353000920373191
32	NC_037328.1:106103370:106103408	NC_037328.1	106103370	106103408	chr1	chr1:106103370:106103408	1	repeats;CpG-deserts;inter	39	NA	NA	NA	NA	NA	NA	0.385254988913525	0.5	0.304169360051713	0.334314522686616	0.841437340153453	0.746046634870164	0.769400252525253	0.729775344481227	0.390730175094561	0.000655351430959108	0.0478408658246171	0.0157845426899657	0.0311121433281606	0.0139480238544728	0.01365036067403
33	NC_037328.1:106125750:106125824	NC_037328.1	106125750	106125824	chr1	chr1:106125750:106125824	2	repeats;CpG-deserts;inter	75	NA	NA	NA	NA	NA	NA	0.514705882352941	0.302380952380952	0.288346883468835	0.547777777777778	0.833198051948052	0.788462758533181	0.825757575757576	0.625992063492063	0.355049738437592	0.00693779280592236	0.048082225764956	0.0276654226564899	0.0551880353255945	0.0246465746714778	0.0245568332828751
34	NC_037328.1:106126143:106126185	NC_037328.1	106126143	106126185	chr1	chr1:106126143:106126185	5	CpG-deserts;inter	43	NA	NA	NA	NA	NA	NA	0.383139534883721	0.415895061728395	0.349063349063349	0.439576802507837	0.971531232725263	0.717478610092544	0.885433019361591	0.68172268907563	0.417122700767932	0.00651463406417321	0.0584821336275362	0.0267898265610866	0.0539711315712981	0.0245919168958247	0.0239939518382116
35	NC_037328.1:106129883:106129922	NC_037328.1	106129883	106129922	chr1	chr1:106129883:106129922	NA	repeats;CpG-deserts;inter	40	NA	NA	NA	NA	NA	NA	0.71875	0.589285714285714	0.40349593495935	0.333333333333333	1	0.84520202020202	0.803130511463845	0.819588363066624	0.355763978038523	0.0186399028438587	0.0528626340483203	0.0412897650897938	0.0830927287004983	0.037442143463745	0.0377532538657345
36	NC_037328.1:106411861:106411942	NC_037328.1	106411861	106411942	chr1	chr1:106411861:106411942	2	transcripts;introns;repeats;CpG-deserts;genes	82	NA	PPM1L	NA	NA	NA	NA	0.432522214627478	0.473830277050091	0.539969197855952	0.585802215977655	0.921483541427362	0.806719978313906	0.695319605319605	0.750103316743253	0.285375634073238	0.00391962693407285	0.0292707662164034	0.0248581115894887	0.0460889789433661	0.0192959515107878	0.0203596486007312
37	NC_037328.1:10660279:10660366	NC_037328.1	10660279	10660366	chr1	chr1:10660279:10660366	NA	transcripts;introns;repeats;CpG-deserts;genes	88	NA	GABPA	NA	NA	NA	NA	0.654776476073906	0.438556067588326	0.693175245806825	0.701996927803379	0.879573170731707	0.766666666666667	0.895468509984639	0.982189840113337	0.258848367555979	0.0170210261990363	0.0291027363955422	0.0455042397596471	0.079538835718305	0.0320174999910269	0.0360494220308041
38	NC_037328.1:10662266:10662316	NC_037328.1	10662266	10662316	chr1	chr1:10662266:10662316	1	transcripts;introns;repeats;CpG-deserts;genes	51	NA	GABPA	NA	NA	NA	NA	0.421230158730159	0.639047619047619	0.687891737891738	0.426264726264726	0.996376811594203	0.82483660130719	0.968505920886873	0.886200332073743	0.375371355981942	0.0062881379471143	0.0512657395774762	0.0257892723821328	0.0532955685226515	0.0232089606937476	0.023683725703177
39	NC_037328.1:106647024:106647041	NC_037328.1	106647024	106647041	chr1	chr1:106647024:106647041	NA	transcripts;first intron;repeats;CpG-deserts;genes	18	NA	PPM1L	NA	NA	NA	NA	0.651052188552189	0.739035087719298	0.448511904761905	0.696019900497512	0.91255498183209	0.712609096330027	0.87268094365552	0.939526772247361	0.225688178133523	0.0349175044638486	0.0260592815219133	0.0683017452297523	0.11547020187615	0.0466419162576213	0.0536287303288208
40	NC_037328.1:106662956:106662973	NC_037328.1	106662956	106662973	chr1	chr1:106662956:106662973	0	transcripts;first intron;repeats;CpG-deserts;genes	18	NA	PPM1L	NA	NA	NA	NA	0.324377737421216	0.31327614379085	0.350305713683323	0.216490299823633	0.820952581369248	0.727772227772228	0.95661717752235	0.686075875029363	0.496741991743542	0.0012389830300538	0.0781314888969047	0.0176655852899124	0.0347826710973367	0.0160212720911853	0.0152711843517245
41	NC_037328.1:10681498:10681547	NC_037328.1	10681498	10681547	chr1	chr1:10681498:10681547	2	transcripts;introns;repeats;CpG-deserts;genes	50	NA	GABPA	NA	NA	NA	NA	0.380952380952381	0.342250372578241	0.481392500471076	0.270612343297975	0.754958183990442	0.670751633986928	0.900148809523809	0.889097744360902	0.434937193640602	0.00101078082179523	0.0625939070172015	0.0169342463582481	0.0335125396274269	0.0152719560313497	0.0147005020811502
42	NC_037328.1:107061351:107061397	NC_037328.1	107061351	107061397	chr1	chr1:107061351:107061397	NA	transcripts;introns;CpG-deserts;genes	47	NA	SMC4	NA	NA	NA	NA	0.822489601901367	0.764311440367778	0.810949788263763	0.887432242042171	0.11984126984127	0.545695634434925	0.431241497604543	0.347599296128708	-0.460201343641408	0.011330969018723	0.0755262409151926	0.0347342036192402	0.0663528818618734	0.0310268232812616	0.0298122274182214
43	NC_037328.1:107160578:107160653	NC_037328.1	107160578	107160653	chr1	chr1:107160578:107160653	NA	transcripts;introns;repeats;CpG-deserts;genes	76	NA	IFT80	NA	NA	NA	NA	0.470521541950113	0.166199813258637	0.36031746031746	0.607461166284696	0.976019798600444	0.807867406458956	0.986515071390799	0.631044809228039	0.449236775966833	0.0118024005066541	0.0845866165458038	0.0359680699119061	0.0675398644010965	0.0323089784682252	0.0303676327368942
44	NC_037328.1:10729423:10729489	NC_037328.1	10729423	10729489	chr1	chr1:10729423:10729489	3	transcripts;introns;CpG-deserts;genes	67	NA	JAM2	NA	NA	NA	NA	0.958333333333333	0.848888888888889	1	0.622222222222222	0.0196078431372549	0	0.178571428571429	0.333333333333333	-0.724482959850607	0.00076519408029505	0.172630193932148	0.0175111904475633	0.0321393189433669	0.0153297385485602	0.0140892189784477
45	NC_037328.1:107294717:107294778	NC_037328.1	107294717	107294778	chr1	chr1:107294717:107294778	2	repeats;CpG-deserts;inter	62	NA	NA	NA	NA	NA	NA	0.532549019607843	0.558315460819072	0.425066137566138	0.484126984126984	0.936422453070895	0.805089759281926	0.828309785452643	0.892857142857143	0.365655384635643	0.000126750577119768	0.0412208127664709	0.0131929322292256	0.0256770431199249	0.0119412567278462	0.0112345720470932
46	NC_037328.1:107308877:107308907	NC_037328.1	107308877	107308907	chr1	chr1:107308877:107308907	NA	repeats;CpG-deserts;inter	31	NA	NA	NA	NA	NA	NA	0.843186936936937	0.66077075991687	0.62005772005772	0.749410124410124	0.964921517735756	0.907212475633528	0.974216027874565	0.863398692810458	0.209080793183164	0.0161634094657343	0.01786551314604	0.0651278605347717	0.0775349233086271	0.0319008519035557	0.0350964187486555
47	NC_037328.1:107320205:107320296	NC_037328.1	107320205	107320296	chr1	chr1:107320205:107320296	NA	CpG-deserts;inter	92	NA	NA	NA	NA	NA	NA	0.528271396396396	0.796275303643725	0.772449428132468	0.845490358697906	0.541631337219573	0.403169575522517	0.166666666666667	0.538525879917184	-0.323123256886138	0.0302996396303948	0.0517137427561953	0.0532823060910325	0.106503030853357	0.0476280238990959	0.049192212209133
48	NC_037328.1:107330135:107330178	NC_037328.1	107330135	107330178	chr1	chr1:107330135:107330178	5	repeats;CpG-deserts;inter	44	NA	NA	NA	NA	NA	NA	0.801576867068858	0.786407408834351	0.830429070853148	0.79545348719506	0.339758225170273	0.245832960887453	0.0332783882783883	0.16441970727685	-0.607644388084613	0.00224746989192164	0.112882062781576	0.0204965764062585	0.0394864301647716	0.0183919908278043	0.0173875131507396
49	NC_037328.1:107331141:107331188	NC_037328.1	107331141	107331188	chr1	chr1:107331141:107331188	NA	repeats;CpG-deserts;inter	48	NA	NA	NA	NA	NA	NA	0.740965556182947	0.744842767295597	0.901084990958409	0.803591606133979	0.309985262350352	0.659451659451659	0.208928571428571	0.2754329004329	-0.434171631726863	0.0172624718603662	0.0736921686557248	0.0420202795568753	0.0801677030838786	0.0378699067949719	0.0363420776420593
50	NC_037328.1:107352144:107352248	NC_037328.1	107352144	107352248	chr1	chr1:107352144:107352248	NA	CpG-deserts;inter	105	NA	NA	NA	NA	NA	NA	0.538515406162465	0.424265951439865	0.0860805860805861	0.548724954462659	0.835714285714286	0.695414462081129	0.960061443932412	0.786193424738316	0.419949179580142	0.0217098805646995	0.0756685588613848	0.0460753275092122	0.0893997638104343	0.0431943140314816	0.0408032870399724
51	NC_037328.1:107356693:107356788	NC_037328.1	107356693	107356788	chr1	chr1:107356693:107356788	5	CpG-deserts;inter	96	NA	NA	NA	NA	NA	NA	0.351554160125589	0.370676691729323	0.224086978674939	0.501223799864773	0.992991452991453	0.832977470558116	0.819559800664452	0.74296580701246	0.485238225207964	0.000776538685793816	0.0775122912454973	0.01642825173916	0.0322130967173799	0.0147982233577329	0.014117577945371
52	NC_037328.1:107357249:107357263	NC_037328.1	107357249	107357263	chr1	chr1:107357249:107357263	NA	CpG-deserts;inter	15	NA	NA	NA	NA	NA	NA	0.616176470588235	0.454079254079254	0.471964224286206	0.647240377632535	0.978657931308318	0.805448717948718	0.71545475800795	0.758929517753047	0.267257649607951	0.0129707176402708	0.0302683785406675	0.0404637806327515	0.0703757861473632	0.028709628729557	0.0316928901723467
53	NC_037328.1:107425306:107425380	NC_037328.1	107425306	107425380	chr1	chr1:107425306:107425380	NA	CpG-deserts;inter	75	NA	NA	NA	NA	NA	NA	0.293981481481481	0.574074074074074	0.511474160727892	0.28482905982906	0	0.277913448721471	0.00595238095238095	0.0148148148148148	-0.34141953290596	0.0147772347019231	0.0506456982994924	0.0370098162307367	0.0743528245497797	0.0326084803668321	0.0335925318686946
54	NC_037328.1:107425638:107425759	NC_037328.1	107425638	107425759	chr1	chr1:107425638:107425759	1	CpG-deserts;inter	122	NA	NA	NA	NA	NA	NA	0.945005611672278	0.862026862026862	0.725478225478225	0.823412698412698	0.373859649122807	0.412640901771337	0.447959183673469	0.327327327327327	-0.448534083923781	0.000457385079049299	0.0621889549416868	0.0150418441043399	0.0295263321367037	0.0135938749661251	0.0129371354291442
55	NC_037328.1:107509860:107509927	NC_037328.1	107509860	107509927	chr1	chr1:107509860:107509927	1	repeats;CpG-deserts;inter	68	NA	NA	NA	NA	NA	NA	0.440102678145873	0.528469649472784	0.335353037766831	0.365895603506094	0.02609218738251	0.198008658008658	0.000925925925925926	0.0161270827937495	-0.357166778695185	0.00133360523310016	0.0432832663697134	0.018004617035176	0.0353124602410728	0.0154995159799139	0.015510146805736
56	NC_037328.1:107552935:107552995	NC_037328.1	107552935	107552995	chr1	chr1:107552935:107552995	NA	transcripts;CDS;exons;introns;CpG-deserts;genes	61	NA	SCHIP1	NA	NA	NA	NA	0.749498746867168	0.448412698412698	0.340989729225023	0.528002699055331	0.976718403547672	0.845704948646125	1	0.739117364117364	0.373659210687735	0.0147608119068239	0.0590642543680553	0.0369823637873571	0.074312699746507	0.0343647725920763	0.0335736851291802
57	NC_037328.1:107561383:107561417	NC_037328.1	107561383	107561417	chr1	chr1:107561383:107561417	2	transcripts;CDS;exons;introns;CpG-deserts;genes	35	NA	SCHIP1	NA	NA	NA	NA	0.65682261208577	0.763780536202487	0.729170713344626	0.788061455678278	0.345439825874608	0.470239043774907	0.211079563079563	0.206925388406417	-0.426037874043917	0.0029938513681572	0.0600195825654989	0.021062829940737	0.0425929830945358	0.0196829185977342	0.0187723245909705
58	NC_037328.1:107653248:107653352	NC_037328.1	107653248	107653352	chr1	chr1:107653248:107653352	5	repeats;CpG-deserts;inter	105	NA	NA	NA	NA	NA	NA	0.502380952380952	0.289393939393939	0.171455938697318	0.300131752305665	0.938245614035088	0.687675070028011	0.835151515151515	0.76610005527916	0.490952417928975	0.00161447515983051	0.0817982818126724	0.0189423826608917	0.0367176820455472	0.0169776001101338	0.0161222430662157
59	NC_037328.1:107666853:107666887	NC_037328.1	107666853	107666887	chr1	chr1:107666853:107666887	1	repeats;CpG-deserts;inter	35	NA	NA	NA	NA	NA	NA	0.426470588235294	0.541672053436759	0.305100696405044	0.530984284532672	0.866993464052288	0.690322249589491	0.95166429755982	0.877948113207547	0.395675125449844	0.0023100772752192	0.0552120817811613	0.0196830221093064	0.0397424890965167	0.0178466262723771	0.0174970140251025
60	NC_037328.1:107666853:107666935	NC_037328.1	107666853	107666935	chr1	chr1:107666853:107666935	NA	repeats;CpG-deserts;inter	83	NA	NA	NA	NA	NA	NA	0.333333333333333	0.25	0.2	0.25	1	0.5	0.6	0.75	0.454166666666667	0.021529706449648	0.0805109126984127	0.0466398639356764	0.0890495475431076	0.0430009161791095	0.0406362505135882
61	NC_037328.1:107738424:107738483	NC_037328.1	107738424	107738483	chr1	chr1:107738424:107738483	NA	CpG-deserts;inter	60	NA	NA	NA	NA	NA	NA	0.519191919191919	0.23974358974359	0.389784439416792	0.349366509926855	0.835879302789814	0.525952380952381	0.984640522875817	0.683410762679055	0.382949127754478	0.0213787119078266	0.0643000084015344	0.0458248972912735	0.0887215475000826	0.0414266252937923	0.0404830417699459
62	NC_037328.1:107775382:107775438	NC_037328.1	107775382	107775438	chr1	chr1:107775382:107775438	NA	repeats;CpG-deserts;inter	57	NA	NA	NA	NA	NA	NA	0.533163054695563	0.830689655172414	0.711712839485995	0.609321445268149	0.312346014492754	0.451837928153718	0.118304093567251	0.423576639725341	-0.344705579670764	0.0138938334968492	0.0508978007749707	0.0366337811632644	0.0723820000640358	0.0313574563101376	0.0326541430128669
63	NC_037328.1:108165221:108165261	NC_037328.1	108165221	108165261	chr1	chr1:108165221:108165261	4	CpG-deserts;inter	41	NA	NA	NA	NA	NA	NA	0.308303624480095	0.519230769230769	0.391339950372208	0.300793650793651	0.677136752136752	0.676816239316239	0.669982441629301	0.734150326797386	0.309604441250739	0.00629919798536025	0.0321894175331182	0.0296912437116639	0.0533301090125072	0.0221886406869779	0.0236987985701591
64	NC_037328.1:108208382:108208441	NC_037328.1	108208382	108208441	chr1	chr1:108208382:108208441	7	CpG-deserts;inter	60	NA	NA	NA	NA	NA	NA	0.310811633603783	0.474145299145299	0.430414642444036	0.319452887537994	0.800922332951171	0.556631299734748	0.816541486651158	0.725072463768116	0.34108578009352	0.00445783592060482	0.0421391328079664	0.0242049998743526	0.0476965055628789	0.0207368750282396	0.0210947098944419
65	NC_037328.1:108366102:108366149	NC_037328.1	108366102	108366149	chr1	chr1:108366102:108366149	3	repeats;CpG-deserts;inter	48	NA	NA	NA	NA	NA	NA	0.249206349206349	0.376273126273126	0.607010582010582	0.392887205387205	0.932334474885845	0.622005735492578	0.9437503071404	0.836155072997178	0.427217081909685	0.00663187779080641	0.0711048247507362	0.0280519227737916	0.0543076005826988	0.0250941693216842	0.024145115211763
66	NC_037328.1:108373275:108373306	NC_037328.1	108373275	108373306	chr1	chr1:108373275:108373306	NA	repeats;CpG-deserts;inter	32	NA	NA	NA	NA	NA	NA	0.415677040677041	0.541863075196408	0.327457264957265	0.289102564102564	0.813218390804598	0.568945868945869	0.664153439153439	0.564217443249701	0.259108799305082	0.0185552207859128	0.0303971232544897	0.0481323436060297	0.0828948889563644	0.033565291073654	0.037652997101401
67	NC_037328.1:108376332:108376367	NC_037328.1	108376332	108376367	chr1	chr1:108376332:108376367	3	CpG-deserts;inter	36	NA	NA	NA	NA	NA	NA	0.406746031746032	0.398632450691947	0.437229437229437	0.511111111111111	0.882984400656814	0.756251636554072	0.881144781144781	0.783735524582207	0.387599328039837	0.000121299266781496	0.0458967811056739	0.0131929322292256	0.0256013282216543	0.0118860787392626	0.011195379803534
68	NC_037328.1:108556296:108556321	NC_037328.1	108556296	108556321	chr1	chr1:108556296:108556321	3	CpG-deserts;inter	26	NA	NA	NA	NA	NA	NA	0.388235294117647	0.463006211583062	0.226592550895956	0.555861581920904	0.829209237973606	0.872415272415272	0.872547822547823	0.749822757887274	0.422574863076602	0.00496000064965938	0.0607658208183116	0.0245068988669344	0.0493320622035016	0.0229375861407281	0.021856842857468
69	NC_037328.1:108672197:108672220	NC_037328.1	108672197	108672220	chr1	chr1:108672197:108672220	6	repeats;CpG-deserts;inter	24	NA	NA	NA	NA	NA	NA	0.347797087148	0.475409265064437	0.309663337032926	0.428784013605442	0.894058774257689	0.613763230390025	0.909953190440995	0.779111738857502	0.408808307773852	0.00410051134744582	0.0581909395689855	0.0233493454371746	0.0466779991539318	0.0212099087168298	0.0206274243172397
70	NC_037328.1:108770616:108770652	NC_037328.1	108770616	108770652	chr1	chr1:108770616:108770652	NA	repeats;CpG-deserts;inter	37	NA	NA	NA	NA	NA	NA	0.661111111111111	0.333153759820426	0.321212121212121	0.662377450980392	0.960000435031198	0.815340695665239	0.958485700890764	0.866910866910867	0.405720813843504	0.0186909434589162	0.0652149618892993	0.0435350546056247	0.0832147916912622	0.0394787369979536	0.037808986385611
71	NC_037328.1:108818645:108818699	NC_037328.1	108818645	108818699	chr1	chr1:108818645:108818699	NA	transcripts;first intron;CpG-deserts;genes	55	NA	RARRES1	NA	NA	NA	NA	0.583190883190883	0.423246101761929	0.371008403361345	0.134414893617021	0.852098108747045	0.86099537037037	0.817443667443667	0.835953878406709	0.463657685759153	0.0149221222964274	0.0763702549557934	0.0382801607143408	0.0746651118400311	0.0352210698176507	0.0337413666479429
72	NC_037328.1:108831769:108831806	NC_037328.1	108831769	108831806	chr1	chr1:108831769:108831806	4	transcripts;first intron;repeats;CpG-deserts;genes	38	NA	RARRES1	NA	NA	NA	NA	0.789240481740482	0.866862899005756	0.753845645566275	0.739820512820513	0.12558993637941	0.40826263519762	0.11687306501548	0.260947368421053	-0.559524133529866	0.0016548245961872	0.0988941548035196	0.0190889795865835	0.0369186274979365	0.0171346045162021	0.016210717251337
73	NC_037328.1:108837358:108837391	NC_037328.1	108837358	108837391	chr1	chr1:108837358:108837391	6	transcripts;introns;CpG-deserts;genes	34	NA	RARRES1	NA	NA	NA	NA	0.584239130434783	0.635697399527187	1	0.858134920634921	0	0.256465517241379	0.234768740031898	0.443650793650794	-0.535796599918205	0.00696554103039051	0.112368793065648	0.029105626110995	0.0552735195259406	0.0289854086970367	0.0245987050462348
74	NC_037328.1:108837453:108837523	NC_037328.1	108837453	108837523	chr1	chr1:108837453:108837523	NA	transcripts;introns;CpG-deserts;genes	71	NA	RARRES1	NA	NA	NA	NA	0.400951199338296	0.552461410095953	0.733134920634921	0.645029239766082	0.0326086956521739	0.388734567901235	0.0521885521885522	0.147985347985348	-0.427514901526986	0.00785444446157246	0.0723186761227837	0.029809589977743	0.0575261642696184	0.0272592206533781	0.0256567068346768
75	NC_037328.1:108879417:108879469	NC_037328.1	108879417	108879469	chr1	chr1:108879417:108879469	NA	transcripts;introns;CpG-deserts;genes	53	NA	GFM1	NA	NA	NA	NA	0.408206309819213	0.608092166646383	0.773646493600872	0.614666666666667	0.00196078431372549	0.412012987012987	0.320018227386648	0.306666666666667	-0.340988242838277	0.0272674855357683	0.0564616010433868	0.0490222710421831	0.100457791922581	0.046106569152103	0.0462058005527841
76	NC_037328.1:108899131:108899172	NC_037328.1	108899131	108899172	chr1	chr1:108899131:108899172	NA	transcripts;introns;CpG-shelves;genes	42	NA	GFM1	NA	NA	NA	NA	0.697748459653222	0.98190508706043	0.917045530076437	0.811402228385151	0.394790329482242	0.706029106029106	0.414552645935625	0.362644979437179	-0.382521061072772	0.0101250742515176	0.0593082072975043	0.0315292121976675	0.063352093363713	0.0285294619321214	0.0284098172665119
77	NC_037328.1:109955089:109955143	NC_037328.1	109955089	109955143	chr1	chr1:109955089:109955143	6	CpG-deserts;inter	55	NA	NA	NA	NA	NA	NA	0.457553199488683	0.503070175438597	0.304761904761905	0.628635778635779	0.896782496782497	0.70679347826087	0.884804453119352	0.942780337941628	0.384284926944846	0.00456429346129797	0.0544702375665637	0.0233686629940284	0.0479984210983882	0.0214822428643598	0.0212371252792859
78	NC_037328.1:110058769:110058791	NC_037328.1	110058769	110058791	chr1	chr1:110058769:110058791	0	repeats;CpG-deserts;inter	23	NA	NA	NA	NA	NA	NA	0.49051948051948	0.411624649859944	0.322397761126659	0.231193181818182	0.819633099141296	0.881722534942077	0.918880363739699	0.923692439353543	0.522048340963087	0.000946352443011047	0.0842339008255456	0.017005225126883	0.0330159658833074	0.0153459563578654	0.0144774733649429
79	NC_037328.1:110072265:110072377	NC_037328.1	110072265	110072377	chr1	chr1:110072265:110072377	5	repeats;CpG-deserts;inter	113	NA	NA	NA	NA	NA	NA	0.176630434782609	0.287613843351548	0.379381371316855	0.113087095303238	0.951388888888889	0.731862745098039	0.855742296918767	0.679791666666667	0.565518213204528	0.000562847918267949	0.10378087613253	0.0161322573001272	0.030295481143224	0.0141794015711615	0.0132736512063409
80	NC_037328.1:110112517:110112536	NC_037328.1	110112517	110112536	chr1	chr1:110112517:110112536	6	CpG-deserts;inter	20	NA	NA	NA	NA	NA	NA	0.255	0.273148148148148	0.402380952380952	0.559380032206119	0.900932400932401	0.712005108556833	0.993055555555555	0.765556597873671	0.47041013254581	0.00265546833526404	0.0787279094293397	0.0208325334336951	0.0411360924784102	0.019261260091725	0.0181352146945957
81	NC_037328.1:11011999:11012060	NC_037328.1	11011999	11012060	chr1	chr1:11011999:11012060	4	repeats;CpG-deserts;inter	62	NA	NA	NA	NA	NA	NA	0.449163879598662	0.0885802469135802	0.251648351648352	0.423737373737374	0.926289682539683	0.738983653162758	0.773429951690821	0.797619047619048	0.505798120778585	0.00441785142300867	0.0880387515909878	0.0248581115894887	0.0476004552022653	0.0224465331304886	0.0210511553141346
82	NC_037328.1:110269223:110269270	NC_037328.1	110269223	110269270	chr1	chr1:110269223:110269270	3	CpG-deserts;inter	48	NA	NA	NA	NA	NA	NA	0.799346405228758	0.960551178126713	0.804669847300779	0.833790933790934	0.199330259112868	0.458273519610356	0.163038986086238	0.170328282828283	-0.60184682920236	0.000957624259320314	0.114482592242124	0.0169722373348597	0.0331299056760594	0.0153875066316191	0.0145276043249206
83	NC_037328.1:110341882:110341959	NC_037328.1	110341882	110341959	chr1	chr1:110341882:110341959	NA	CpG-deserts;inter	78	NA	NA	NA	NA	NA	NA	0.437121176374171	0.360719373219373	0.0933998100664767	0.268609548873988	0.909757312623576	0.578196176521908	0.91888270459699	0.558591623197153	0.451394477101405	0.0126518703727374	0.0847382395730392	0.0371459139315833	0.0695740170990018	0.0335892733158649	0.0313115606140233
84	NC_037328.1:110350462:110350491	NC_037328.1	110350462	110350491	chr1	chr1:110350462:110350491	NA	repeats;CpG-deserts;inter	30	NA	NA	NA	NA	NA	NA	0.75016339869281	0.636109323609324	0.51046046046046	0.523163190441254	0.826218323586745	0.914542922287242	0.657365510306687	0.845536445536446	0.205941707128318	0.0389394916986761	0.0226068841885317	0.074340780293251	0.12308046244149	0.0457579276541488	0.0574411060934152
85	NC_037328.1:110355981:110356006	NC_037328.1	110355981	110356006	chr1	chr1:110355981:110356006	0	repeats;CpG-deserts;inter	26	NA	NA	NA	NA	NA	NA	0.709307359307359	0.821578316861336	0.711843711843712	0.784159159159159	1	1	1	1	0.243277863207109	0.00311635145309725	0.0182270836989361	0.0289638169817153	0.043085775199379	0.0182382906646484	0.0190010767083218
86	NC_037328.1:110421847:110421873	NC_037328.1	110421847	110421873	chr1	chr1:110421847:110421873	3	CpG-deserts;inter	27	NA	NA	NA	NA	NA	NA	0.378442728442728	0.418389439196827	0.36525974025974	0.456349206349206	0.793534726143422	0.714541160593792	0.806530862038818	0.796213922335558	0.373094889215772	1.53721013067755e-05	0.0412733345063789	0.012600649688457	0.0245176769377293	0.0113378469747453	0.0106516178758721
87	NC_037328.1:110435916:110435948	NC_037328.1	110435916	110435948	chr1	chr1:110435916:110435948	NA	CpG-shelves;repeats;inter	33	NA	NA	NA	NA	NA	NA	0.856981981981982	0.898559827971593	1	0.65982905982906	0.263888888888889	0.628284987012084	0.120097146326655	0.229951335214493	-0.543287128085129	0.008519455855291	0.113890821143041	0.0335618499454739	0.0593257244862932	0.0283397216203885	0.0265149931859009
88	NC_037328.1:110452110:110452203	NC_037328.1	110452110	110452203	chr1	chr1:110452110:110452203	3	transcripts;introns;CpG-shelves;genes	94	NA	CCNL1	NA	NA	NA	NA	0.354166666666667	0.0714285714285714	0.140713276836158	0.435185185185185	0.75476689627633	0.654715776027251	0.902958937198068	0.690646955503513	0.500398716222145	0.00425947255454626	0.0893987750023563	0.024059965186724	0.0471560403684423	0.0221886406869779	0.0208469451500125
89	NC_037328.1:110474744:110474776	NC_037328.1	110474744	110474776	chr1	chr1:110474744:110474776	NA	CpG-deserts;inter	33	NA	NA	NA	NA	NA	NA	0.73525641025641	0.454109062980031	0.620054945054945	0.754615384615385	0.930513179082973	0.765498652291105	0.94613453815261	0.861965811965812	0.235019094646432	0.0336847502811935	0.0268465195439538	0.0607472574231351	0.113182665691134	0.0452939813661125	0.0524797610079011
90	NC_037328.1:110478273:110478302	NC_037328.1	110478273	110478302	chr1	chr1:110478273:110478302	NA	CpG-shelves;inter	30	NA	NA	NA	NA	NA	NA	0.561111111111111	0.571645021645022	0.655820105820106	0.777721088435374	0.800617511143827	0.894608294930876	1	0.886328502415459	0.253814245369637	0.00836900712115583	0.0255649229377779	0.032872774112056	0.0588558119972043	0.0243673866390125	0.0262938385268812
91	NC_037328.1:110498037:110498101	NC_037328.1	110498037	110498101	chr1	chr1:110498037:110498101	NA	CpG-deserts;inter	65	NA	NA	NA	NA	NA	NA	0.577787636793848	0.605637254901961	0.297864225781846	0.549446073639622	0.653888888888889	0.736057896977437	1	0.804311497326203	0.290880773018813	0.0295517228094544	0.0421354876027746	0.0560089769619324	0.104991334663398	0.0451575801928863	0.0484522246562387
92	NC_037328.1:110498584:110498636	NC_037328.1	110498584	110498636	chr1	chr1:110498584:110498636	10	repeats;CpG-deserts;inter	53	NA	NA	NA	NA	NA	NA	0.486402694908434	0.434056720006661	0.232843048563863	0.36299390912821	0.741633204860149	0.647329788425231	0.817381371056574	0.741800743541079	0.357962183818966	0.00257780275134292	0.043857839848263	0.0208711140868375	0.0408110383582522	0.0177003163262772	0.017991789321186
93	NC_037328.1:110519033:110519074	NC_037328.1	110519033	110519074	chr1	chr1:110519033:110519074	NA	CpG-deserts;inter	42	NA	NA	NA	NA	NA	NA	0.674069737184491	0.534535902694381	0.42597721400047	0.507789065969046	0.858635384918376	0.649113806658391	0.798624541488027	0.931629932006526	0.273907936305733	0.0139236258690733	0.0321698187969276	0.0385115275113531	0.0724587561746528	0.0296387270291739	0.0326895957434831
94	NC_037328.1:110533770:110533810	NC_037328.1	110533770	110533810	chr1	chr1:110533770:110533810	NA	repeats;CpG-deserts;inter	41	NA	NA	NA	NA	NA	NA	0.523858898764023	0.388183562028955	0.335868020385199	0.464129288078868	1	0.593944639322588	0.846857142857143	0.846633552968757	0.393848891472861	0.011330958929283	0.0593885228383109	0.0329656892493378	0.0663528818618734	0.0317157079997064	0.0298122274182214
95	NC_037328.1:110704483:110704514	NC_037328.1	110704483	110704514	chr1	chr1:110704483:110704514	0	repeats;CpG-deserts;inter	32	NA	NA	NA	NA	NA	NA	0.286510590858417	0.192701863354037	0.140242763772176	0.270825982357658	0.779558823529412	0.518347338935574	0.902954089437193	0.654119197085949	0.49117456216146	0.00534266907361281	0.0826369772355162	0.0268851968614387	0.0504545912959915	0.0238611612126096	0.0223716652101271
96	NC_037328.1:110773464:110773555	NC_037328.1	110773464	110773555	chr1	chr1:110773464:110773555	NA	repeats;CpG-deserts;inter	92	NA	NA	NA	NA	NA	NA	0.535997732426304	0.404931669637552	0.47	0.453581871345029	0.765620490620491	0.697380743342113	0.995670995670996	0.750892857142857	0.336263453341893	0.00935860147903551	0.0410476897144975	0.0304923635377186	0.0613771770145652	0.0260962609018026	0.0274682564596443
97	NC_037328.1:110849793:110849840	NC_037328.1	110849793	110849840	chr1	chr1:110849793:110849840	NA	CpG-deserts;inter	48	NA	NA	NA	NA	NA	NA	0.31878166607753	0.235030864197531	0.255003450655625	0.327205882352941	0.725719696969697	0.578097190439868	0.915139448240494	0.559259259259259	0.410548432906423	0.0123112875889407	0.0607016308732199	0.0344927138527835	0.0687313157387053	0.0309697851697932	0.0309261506892612
98	NC_037328.1:110887725:110887765	NC_037328.1	110887725	110887765	chr1	chr1:110887725:110887765	NA	CpG-deserts;inter	41	NA	NA	NA	NA	NA	NA	0.538992408557626	0.660567675346	0.42919481981982	0.766930767779664	0.911009396054261	0.735988103106411	0.845238095238095	0.886871766444937	0.245855422335149	0.0351073981756611	0.0290442458127266	0.0685445101785526	0.115841847940996	0.0467752599591219	0.0538156692169981
99	NC_037328.1:110894063:110894164	NC_037328.1	110894063	110894164	chr1	chr1:110894063:110894164	NA	CpG-deserts;inter	102	NA	NA	NA	NA	NA	NA	0.320819634898709	0.514	0.546869779013183	0.716085252865566	0.779784688995215	0.834013435487453	0.94531746031746	0.915010760401722	0.344087919606098	0.0163934208754504	0.0475311622844205	0.0395146039747398	0.0780329998042704	0.0344813108285568	0.0353351350990115
100	NC_037328.1:110895754:110895835	NC_037328.1	110895754	110895835	chr1	chr1:110895754:110895835	NA	CpG-deserts;inter	82	NA	NA	NA	NA	NA	NA	0.714855072463768	0.451071428571429	0.650974025974026	0.43796574770259	0.876754385964912	0.85295045045045	0.914308061478647	0.716614255765199	0.276440219736849	0.0202110995860339	0.033437361218213	0.0432379821144615	0.0863073188283733	0.0347142238727788	0.0393138935959659
101	NC_037328.1:110896415:110896470	NC_037328.1	110896415	110896470	chr1	chr1:110896415:110896470	1	repeats;CpG-deserts;inter	56	NA	NA	NA	NA	NA	NA	0.540901272789818	0.451960263999456	0.484585652442795	0.365800865800866	0.974226203807391	0.879639455782313	0.78135189669088	0.937637362637363	0.432401715971253	0.000265164666456309	0.0587516065270252	0.0141192968064526	0.027765083233857	0.0126698117339014	0.0121915645165207
102	NC_037328.1:110897043:110897102	NC_037328.1	110897043	110897102	chr1	chr1:110897043:110897102	6	CpG-deserts;inter	60	NA	NA	NA	NA	NA	NA	0.389939024390244	0.586666666666667	0.345403439153439	0.525478927203065	0.877777777777778	0.770833333333333	0.683333333333333	0.778880070546737	0.315834114394442	0.00500113895992568	0.0366900538861602	0.0248581115894887	0.0494307229089273	0.0214712700118092	0.0219017538161613
103	NC_037328.1:110900078:110900144	NC_037328.1	110900078	110900144	chr1	chr1:110900078:110900144	NA	CpG-deserts;inter	67	NA	NA	NA	NA	NA	NA	0.604209799861974	0.519382058114452	0.393195543984556	0.339285714285714	0.932840307840308	0.688979591836735	0.612233445566779	0.86452466291176	0.310626222977221	0.0187813649701158	0.0432986240361301	0.0435000371985899	0.0833804856907251	0.0357520978188898	0.0378907242772867
104	NC_037328.1:110900119:110900213	NC_037328.1	110900119	110900213	chr1	chr1:110900119:110900213	NA	CpG-deserts;inter	95	NA	NA	NA	NA	NA	NA	0.428571428571429	0	0.166666666666667	0.5	0.928571428571429	1	0.8	0.666666666666667	0.575	0.00833445480333688	0.126799076773567	0.0340354481667754	0.0587848734053449	0.0307383704672649	0.0262617414652675
105	NC_037328.1:110979989:110980089	NC_037328.1	110979989	110980089	chr1	chr1:110979989:110980089	NA	repeats;CpG-deserts;inter	101	NA	NA	NA	NA	NA	NA	0.390391156462585	0.185621118012422	0.340917397660819	0.523952531486778	0.840748544897717	0.489799412915851	0.611952054794521	0.768888888888889	0.317626674468593	0.0239410946247445	0.0478398552769425	0.0474800541289572	0.0938294038268828	0.0414092569107466	0.0429592203823798
106	NC_037328.1:111000822:111000893	NC_037328.1	111000822	111000893	chr1	chr1:111000822:111000893	2	CpG-deserts;inter	72	NA	NA	NA	NA	NA	NA	0.509408983451537	0.371215575275398	0.174945628453438	0.332498904690081	0.883562735791652	0.750308293790792	0.994516129032258	0.915869564855216	0.539046907899866	0.00102122870807186	0.0955721858919113	0.0171698072708932	0.0335820951607882	0.0154995159799139	0.0147388413885107
107	NC_037328.1:111109818:111109849	NC_037328.1	111109818	111109849	chr1	chr1:111109818:111109849	NA	repeats;CpG-deserts;inter	32	NA	NA	NA	NA	NA	NA	0.464285714285714	0.269920634920635	0.497967479674797	0.338550724637681	0.786924939467312	0.528444256892533	0.527972027972028	0.656482315498709	0.232274746577939	0.0301894074206169	0.0268662915657265	0.0623923089044878	0.10631256326256	0.0428657640585826	0.049093462489899
108	NC_037328.1:111110205:111110214	NC_037328.1	111110205	111110214	chr1	chr1:111110205:111110214	0	repeats;CpG-deserts;inter;downstream	10	NA	NA	NA	NA	NA	KCNAB1	0.381860098965362	0.496228861915136	0.517105263157895	0.38432503649895	0.95026455026455	0.826890357475464	0.831257631257631	0.762085868830291	0.397744786822648	0.000305804214660191	0.0500490081651256	0.0142681164965324	0.0279779321429268	0.0127035430819998	0.0122706933019982
109	NC_037328.1:111114301:111114379	NC_037328.1	111114301	111114379	chr1	chr1:111114301:111114379	NA	transcripts;introns;CpG-deserts;genes	79	NA	KCNAB1	NA	NA	NA	NA	0.114944013781223	0.287086905683963	0.382030736294824	0.237843975196916	0.0223069223069223	0.148712507074137	0.0258467023172906	0.00272108843537415	-0.2055796027058	0.0253894893583774	0.0192758749226579	0.0876815665865827	0.0967680893168859	0.0397680862279858	0.0443932362065087
110	NC_037328.1:111132622:111132731	NC_037328.1	111132622	111132731	chr1	chr1:111132622:111132731	5	transcripts;introns;CpG-shores;genes	110	NA	KCNAB1	NA	NA	NA	NA	0.5	0.333333333333333	0.666666666666667	0.461538461538462	1	0.909090909090909	0.857142857142857	0.857142857142857	0.41545954045954	0.00433483119022621	0.0593568257020876	0.0235659837432931	0.0473707374638526	0.0213752698408002	0.0209412013383513
111	NC_037328.1:111132694:111132731	NC_037328.1	111132694	111132731	chr1	chr1:111132694:111132731	4	transcripts;introns;CpG-shores;genes	38	NA	KCNAB1	NA	NA	NA	NA	0.418603887575519	0.529344151453685	0.266269841269841	0.364728682170543	0.832249592003264	0.662087087087087	0.760700006554368	0.637828759291023	0.328479720616539	0.00393901250838772	0.0394588538671544	0.0233122510133442	0.0461068261921337	0.0200283301173413	0.0203688885964562
112	NC_037328.1:111133406:111133427	NC_037328.1	111133406	111133427	chr1	chr1:111133406:111133427	3	transcripts;introns;CpG-shelves;genes	22	NA	KCNAB1	NA	NA	NA	NA	0.791107395020439	0.85589496453467	0.69077813218604	0.757810491785647	1	1	0.998780487804878	0.960884353741497	0.216018464504895	0.00587966873725086	0.0155200185100025	0.0658093823083002	0.0520669444388426	0.0219015389250928	0.0231082444504635
113	NC_037328.1:111168831:111168911	NC_037328.1	111168831	111168911	chr1	chr1:111168831:111168911	NA	transcripts;introns;CpG-deserts;genes	81	NA	KCNAB1	NA	NA	NA	NA	0.426785714285714	0.457101449275362	0.622134038800705	0.820261437908497	0.273526077097506	0.373015873015873	0.0040650406504065	0.12037037037037	-0.388826319784031	0.0190326995785415	0.068614691008208	0.0436328844701031	0.0839196404234038	0.0403189103303041	0.0381459429656944
114	NC_037328.1:111196339:111196378	NC_037328.1	111196339	111196378	chr1	chr1:111196339:111196378	NA	transcripts;introns;CpG-deserts;genes	40	NA	KCNAB1	NA	NA	NA	NA	0.645598845598846	0.483075435203095	0.155011655011655	0.470770558694287	0.94911218724778	0.690656565656566	0.979273504273504	0.848710317460318	0.428324020032571	0.0163887450459553	0.0777122953180839	0.0411577287856979	0.0780201552587116	0.0378349753316571	0.0353295647626621
115	NC_037328.1:111204233:111204288	NC_037328.1	111204233	111204288	chr1	chr1:111204233:111204288	4	transcripts;introns;repeats;CpG-deserts;genes	56	NA	KCNAB1	NA	NA	NA	NA	0.590277777777778	0.305597996774467	0.450847115491703	0.384868421052632	0.888813303099017	0.656111111111111	0.813672438672439	0.823015873015873	0.362505353700465	0.00385462737258969	0.047949559654147	0.0231876111383435	0.0458427330159656	0.0200155318560743	0.0202549410148165
116	NC_037328.1:111260212:111260305	NC_037328.1	111260212	111260305	chr1	chr1:111260212:111260305	NA	transcripts;first intron;CpG-deserts;genes	94	NA	KCNAB1	NA	NA	NA	NA	0.948863636363636	0.746766169154229	0.957631874298541	0.763888888888889	0.0222222222222222	0.598009367681499	0.198287910552061	0.431603773584906	-0.541756823666152	0.0162641923855201	0.117052179498356	0.0419714671222767	0.0777725327133754	0.0387062258168754	0.0352093459960178
117	NC_037328.1:111559847:111559885	NC_037328.1	111559847	111559885	chr1	chr1:111559847:111559885	4	CpG-deserts;inter	39	NA	NA	NA	NA	NA	NA	0.433333333333333	0.285970250169033	0.295833333333333	0.156439393939394	0.869792960662526	0.534272300469484	0.703703703703704	0.705627705627706	0.410455089922082	0.00395294437282083	0.0616631780313429	0.0236573613857605	0.0461630184217522	0.0207181728164324	0.020394625516437
118	NC_037328.1:111637339:111637357	NC_037328.1	111637339	111637357	chr1	chr1:111637339:111637357	NA	repeats;CpG-deserts;inter	19	NA	NA	NA	NA	NA	NA	0.692387343785643	0.557687645687646	0.434706897008558	0.643454625869487	0.788422442244224	0.727244047619048	0.818016189290162	0.813731900283625	0.204794516771431	0.0294021054729911	0.018197038526153	0.0972658673254978	0.104749845877239	0.0428932648315152	0.0483258558000886
119	NC_037328.1:111731071:111731168	NC_037328.1	111731071	111731168	chr1	chr1:111731071:111731168	NA	repeats;CpG-deserts;inter;downstream	98	NA	NA	NA	NA	NA	GMPS	0.793103448275862	0.832532051282051	0.966988727858293	0.927505330490405	0.0497427101200686	0.655279189525765	0.0347786811201445	0.0811870100783875	-0.674785491765561	0.017116911083113	0.171637116039451	0.0518398547371414	0.0798242938223164	0.0447308864863669	0.0361799187438971
120	NC_037328.1:111744851:111744954	NC_037328.1	111744851	111744954	chr1	chr1:111744851:111744954	NA	transcripts;introns;repeats;CpG-deserts;genes	104	NA	GMPS	NA	NA	NA	NA	0.581481481481481	0.67629152117468	0.782669461914745	0.429591493855607	0.971132897603486	0.765319721091835	0.923333333333333	0.852843915343915	0.260648977236514	0.0313419808228883	0.0324683621776379	0.0652383848362759	0.108638420993951	0.0438230672732311	0.0502292000929887
121	NC_037328.1:111942854:111942961	NC_037328.1	111942854	111942961	chr1	chr1:111942854:111942961	NA	CpG-deserts;inter	108	NA	NA	NA	NA	NA	NA	0.382775119617225	0.361594202898551	0.408031932225481	0.363324175824176	0.613063063063063	0.87	0.645682367149758	0.851997013811124	0.366254253364628	0.011074386745337	0.0462906722719226	0.0341792748122012	0.0658140342311142	0.0296172240127569	0.0295551436194401
122	NC_037328.1:112602728:112602745	NC_037328.1	112602728	112602745	chr1	chr1:112602728:112602745	0	repeats;CpG-deserts;inter	18	NA	NA	NA	NA	NA	NA	0.516214177978884	0.55719696969697	0.457440476190476	0.358488132094943	0.756347256347256	0.935666736009985	0.824637586522137	0.768507261060453	0.34895477099464	0.0010921400795505	0.0408493683272392	0.0169716328123353	0.0339957952447075	0.0150754692834021	0.0149180630811168
123	NC_037328.1:113386837:113386858	NC_037328.1	113386837	113386858	chr1	chr1:113386837:113386858	NA	transcripts;CDS;exons;introns;CpG-deserts;genes	22	NA	ARHGEF26	NA	NA	NA	NA	0.334448160535117	0.4375	0.338635477582846	0.441174526040892	0.955929508770984	0.551785277573979	1	0.719617224880383	0.418893461766623	0.0238887744002433	0.0705321538235484	0.0491471346520879	0.0937134070056193	0.0462720998027354	0.0429034809167105
124	NC_037328.1:113392252:113392300	NC_037328.1	113392252	113392300	chr1	chr1:113392252:113392300	4	transcripts;introns;CpG-deserts;genes	49	NA	ARHGEF26	NA	NA	NA	NA	0.538794860667272	0.450095785440613	0.344444444444444	0.283798068161108	0.792888563049853	0.609017809675704	0.730335804499128	0.809788654060067	0.331224418142829	0.00427522657548306	0.0403636311838166	0.024183050172101	0.0472076807111118	0.0207830872327682	0.0208693423499436
125	NC_037328.1:113397290:113397321	NC_037328.1	113397290	113397321	chr1	chr1:113397290:113397321	1	transcripts;introns;repeats;CpG-deserts;genes	32	NA	ARHGEF26	NA	NA	NA	NA	0.809208541716282	0.765972222222222	0.632181155950256	0.676279069767442	1	0.912457912457913	0.984729064039409	0.909506556245687	0.230763135771702	0.00481796514897904	0.0189913211529709	0.0345238637566704	0.0489495893887148	0.0206345463841568	0.0216773676004051
126	NC_037328.1:113418490:113418576	NC_037328.1	113418490	113418576	chr1	chr1:113418490:113418576	NA	transcripts;introns;CpG-deserts;genes	87	NA	ARHGEF26	NA	NA	NA	NA	0.333333333333333	0.5	0.333333333333333	0	1	1	0.6	0.75	0.545833333333334	0.00912932703580685	0.120669642857143	0.0323492454881035	0.0608269279035746	0.0325461779738707	0.0272129940815528
127	NC_037328.1:113418520:113418576	NC_037328.1	113418520	113418576	chr1	chr1:113418520:113418576	NA	transcripts;introns;CpG-deserts;genes	57	NA	ARHGEF26	NA	NA	NA	NA	0.512430033878333	0.60577465968739	0.579319726049647	0.695630970336853	0.937131393470272	0.763457177742892	0.903239057913511	0.719715600854841	0.232596960007323	0.0137458644784239	0.0226991905224172	0.0423388775241644	0.072071716324855	0.0277693553581647	0.0325035547338375
128	NC_037328.1:113454015:113454067	NC_037328.1	113454015	113454067	chr1	chr1:113454015:113454067	NA	transcripts;introns;CpG-deserts;genes	53	NA	ARHGEF26	NA	NA	NA	NA	0.456304788108067	0.597308603938822	0.33614591593973	0.632901841587699	1	0.701970443349754	0.810597402597403	0.85495695761142	0.336215913496065	0.0108138789558249	0.0467956316444769	0.0328792680263083	0.0651768948838099	0.02822770235931	0.0292594836093286
129	NC_037328.1:113518137:113518181	NC_037328.1	113518137	113518181	chr1	chr1:113518137:113518181	6	transcripts;first intron;CpG-shores;genes	45	NA	ARHGEF26	NA	NA	NA	NA	0.402442918370009	0.418207282913165	0.181973581973582	0.317005525338859	0.843075396825397	0.816789215686274	0.83419540229885	0.822198761261261	0.499157366869042	0.00248940026153473	0.0762636785420131	0.0204965764062585	0.0404635737163476	0.0188648246296989	0.0178346133420105
130	NC_037328.1:113673946:113674006	NC_037328.1	113673946	113674006	chr1	chr1:113673946:113674006	NA	CpG-deserts;inter	61	NA	NA	NA	NA	NA	NA	0.110087213599409	0.0299465240641711	0.075959595959596	0.220941176470588	1	0.324761260245131	0.687768817204301	0.591889483065954	0.541871262605406	0.0255646143067086	0.120028644566785	0.0537317795364521	0.0970918696988385	0.0486399498111719	0.0445525366575029
131	NC_037328.1:113674075:113674149	NC_037328.1	113674075	113674149	chr1	chr1:113674075:113674149	NA	CpG-deserts;inter	75	NA	NA	NA	NA	NA	NA	0.459266415159669	0.283744202106294	0.256528994576554	0.256646556544931	0.766775282514292	0.457022817619125	0.936722274171003	0.900958994708995	0.451323300156492	0.0181947344968745	0.0826887785049326	0.0453604294557862	0.0821276457871986	0.0394202600115855	0.0372851893939469
132	NC_037328.1:114045657:114045680	NC_037328.1	114045657	114045680	chr1	chr1:114045657:114045680	NA	CpG-deserts;inter	24	NA	NA	NA	NA	NA	NA	0.642108454608455	0.588287914973276	0.297524938829287	0.367487812584635	0.990598290598291	0.814991664682067	0.914577010165245	0.791635526711841	0.404098342790448	0.00954494481756451	0.0622637775488992	0.0320458546451604	0.0618660567291227	0.0291687819942755	0.0276924823244628
133	NC_037328.1:114418986:114419034	NC_037328.1	114418986	114419034	chr1	chr1:114418986:114419034	2	CpG-deserts;inter	49	NA	NA	NA	NA	NA	NA	0.501727336702706	0.669940476190476	0.313496362792137	0.408470019307458	0.996732026143791	0.847852598091198	1	0.893232323232323	0.461045688118634	0.00418471465936041	0.073102255035483	0.0240624970675053	0.0468751582189352	0.0216291334102324	0.0207181870309415
134	NC_037328.1:114490994:114491048	NC_037328.1	114490994	114491048	chr1	chr1:114490994:114491048	4	CpG-deserts;inter	55	NA	NA	NA	NA	NA	NA	0.696248759963055	0.506355812678627	0.517629557502975	0.600446859903382	0.94400871459695	0.811194538333602	0.998591549295775	0.955958444498343	0.347268064169158	0.00117202670161664	0.0405855516909865	0.0174815764762031	0.0343781995178236	0.0151700664381759	0.015096397438341
135	NC_037328.1:114498236:114498252	NC_037328.1	114498236	114498252	chr1	chr1:114498236:114498252	0	repeats;CpG-deserts;inter	17	NA	NA	NA	NA	NA	NA	0.842657342657343	0.571144278606965	0.712753623188406	0.802863190730838	0.0548387096774194	0.296717171717172	0.104497354497354	0.291666666666667	-0.545424633156235	0.000769094179221887	0.0979647751098813	0.01642825173916	0.0321920060025762	0.0150754692834021	0.0141110257173366
136	NC_037328.1:114498562:114498671	NC_037328.1	114498562	114498671	chr1	chr1:114498562:114498671	4	CpG-deserts;inter	110	NA	NA	NA	NA	NA	NA	0.550097751710655	0.559514790764791	0.859259259259259	0.699931140420573	0.17984496124031	0.188690476190476	0.184822361546499	0.229166666666667	-0.471569619127832	0.00663212360787707	0.0727945394748405	0.0279993512064292	0.0543076005826988	0.0253093212029284	0.024145115211763
137	NC_037328.1:115079341:115079376	NC_037328.1	115079341	115079376	chr1	chr1:115079341:115079376	5	CpG-deserts;inter	36	NA	NA	NA	NA	NA	NA	0	0	0.5	0	1	1	1	1	0.875	0.00598625569770709	0.245535714285714	0.0319956638718286	0.0524452676875373	0.0270609901127691	0.0232788420264582
138	NC_037328.1:115079363:115079376	NC_037328.1	115079363	115079376	chr1	chr1:115079363:115079376	3	CpG-deserts;inter	14	NA	NA	NA	NA	NA	NA	0.592746400885936	0.409126984126984	0.480789613142554	0.409229390681004	0.964479050797182	0.738095238095238	0.904801767236368	0.754971988795518	0.367613914021957	0.0023963382798986	0.0471619394316513	0.0201846182546691	0.040025077943338	0.0178018700164542	0.0176357869312413
139	NC_037328.1:115158454:115158487	NC_037328.1	115158454	115158487	chr1	chr1:115158454:115158487	NA	CpG-deserts;inter	34	NA	NA	NA	NA	NA	NA	0.629001080220592	0.368387825624668	0.371827184327184	0.541216680823525	0.877035873265253	0.722335493388125	0.967460317460318	0.686868686868687	0.335816899996603	0.0108501067353579	0.046816793992443	0.0328836568687443	0.0652647751992154	0.029250001215183	0.0292984463418582
140	NC_037328.1:115162970:115162996	NC_037328.1	115162970	115162996	chr1	chr1:115162970:115162996	NA	CpG-deserts;inter	27	NA	NA	NA	NA	NA	NA	0.354439211582069	0.323913043478261	0.372322696577109	0.577887537993921	0.791724186754451	0.494538407329105	0.799786393536393	0.810408432147563	0.316973732534038	0.0181995621984768	0.0444949843196854	0.0428451312022015	0.0821336741307887	0.0353099277626984	0.037288749301857
141	NC_037328.1:115165078:115165138	NC_037328.1	115165078	115165138	chr1	chr1:115165078:115165138	NA	CpG-deserts;inter	61	NA	NA	NA	NA	NA	NA	0.311252771618625	0.351190476190476	0.759920634920635	0.49766081871345	1	0.700996677740864	0.975324675324675	0.920634920634921	0.419232893064319	0.01730155546511	0.0758495766927362	0.041136971272021	0.0802442844830062	0.0391856731634019	0.0363785021343383
142	NC_037328.1:115165298:115165361	NC_037328.1	115165298	115165361	chr1	chr1:115165298:115165361	1	CpG-deserts;inter	64	NA	NA	NA	NA	NA	NA	0.494444444444444	0.511374442250018	0.386904761904762	0.602722082985241	0.903741134751773	0.942273135669362	0.848931623931624	0.815111408658633	0.378652892856732	0.00073552190979708	0.0456922980601937	0.0162202108076625	0.0317442631465452	0.0141721990102951	0.0139254528086867
143	NC_037328.1:115309234:115309258	NC_037328.1	115309234	115309258	chr1	chr1:115309234:115309258	NA	transcripts;introns;CpG-deserts;genes	25	NA	MBNL1	NA	NA	NA	NA	0.917995746943115	0.835360105580694	0.987698412698413	0.996794871794872	0.516870596959585	0.774394689382602	0.379796326604837	0.342261904761905	-0.431131404827041	0.015771095251741	0.0719176164750742	0.0401674189002777	0.0765666574312459	0.0366315887238605	0.0346351541076005
144	NC_037328.1:115498773:115498812	NC_037328.1	115498773	115498812	chr1	chr1:115498773:115498812	3	CpG-shores;inter	40	NA	NA	NA	NA	NA	NA	0.464076430831176	0.297253550543024	0.192411924119241	0.402134151627052	0.792881944444444	0.582101232101232	0.923223615464995	0.681051206857658	0.405845485436959	0.00566411872145634	0.0624233762487939	0.0261348229066166	0.0513637329728321	0.0239698065895535	0.0227933010813551
145	NC_037328.1:115520137:115520151	NC_037328.1	115520137	115520151	chr1	chr1:115520137:115520151	4	CpG-deserts;inter	15	NA	NA	NA	NA	NA	NA	0.655688729874776	0.869285385985407	0.778107268877911	0.525230690362269	0.0531698642614712	0.36554894771789	0.21485466539913	0.194925474254743	-0.499953280866782	0.00242229203972855	0.0879973096424368	0.0208075595958165	0.0401241855792523	0.0186721726375534	0.0176849267266876
146	NC_037328.1:115521603:115521632	NC_037328.1	115521603	115521632	chr1	chr1:115521603:115521632	NA	CpG-deserts;inter	30	NA	NA	NA	NA	NA	NA	0.34160756501182	0.67772397094431	0.734271943176053	0.627936507936508	0.232528011204482	0.36832504145937	0.108710359408034	0.240629984051037	-0.357836647736442	0.0175461848418728	0.0544803543349238	0.0392029229484706	0.0807571518423775	0.0360880798824422	0.0366234980614802
147	NC_037328.1:115738782:115738803	NC_037328.1	115738782	115738803	chr1	chr1:115738782:115738803	4	CpG-deserts;inter	22	NA	NA	NA	NA	NA	NA	0.593292682926829	0.591491841491842	0.422186147186147	0.605860189193522	0.960625433640599	0.846765350877193	0.889422084623323	0.740197262479871	0.306044817705661	0.00298394312654706	0.0336935754486359	0.0212671787049494	0.0425333794114969	0.0178982887783462	0.0187470529362416
148	NC_037328.1:115950736:115950745	NC_037328.1	115950736	115950745	chr1	chr1:115950736:115950745	NA	CpG-deserts;inter	10	NA	NA	NA	NA	NA	NA	0.746212121212121	0.566819055191148	0.78505291005291	0.504385964912281	0.142857142857143	0.4375	0.166666666666667	0	-0.463861560461163	0.00773539261002394	0.0837190278397746	0.0294463827923016	0.0572679475220042	0.027236747039617	0.0255307408703554
149	NC_037328.1:116104037:116104095	NC_037328.1	116104037	116104095	chr1	chr1:116104037:116104095	NA	CpG-deserts;inter	59	NA	NA	NA	NA	NA	NA	0.647297943567671	0.674242424242424	0.246710526315789	0.559090909090909	0.93999038692622	0.703635620915033	0.930942176103466	0.981182795698925	0.357102294106713	0.0272247443090934	0.0597016119787578	0.0501944030370464	0.100378842233649	0.0499492723349708	0.0461666200779368
150	NC_037328.1:116145530:116145590	NC_037328.1	116145530	116145590	chr1	chr1:116145530:116145590	NA	repeats;CpG-deserts;inter	61	NA	NA	NA	NA	NA	NA	0.373327695560254	0.585526315789474	0.482326118326118	0.638049881153329	0.93140651015651	0.653418803418804	0.86875	0.736476465631395	0.277705442094384	0.0180176860965346	0.0346989734164675	0.0411754756346319	0.0817953566619789	0.0344325166116362	0.0371231953323633
151	NC_037328.1:116659429:116659480	NC_037328.1	116659429	116659480	chr1	chr1:116659429:116659480	NA	transcripts;introns;CpG-deserts;genes	52	NA	MED12L	NA	NA	NA	NA	0.5	0.75	0.285714285714286	0.333333333333333	0.75	1	1	0.714285714285714	0.398809523809524	0.0247691213363142	0.0746274700356333	0.0504763960874808	0.0955229499099058	0.0476065968791754	0.043777456647463
152	NC_037328.1:116659516:116659532	NC_037328.1	116659516	116659532	chr1	chr1:116659516:116659532	7	transcripts;introns;CpG-deserts;genes	17	NA	MED12L	NA	NA	NA	NA	0.397800925925926	0.584806108375902	0.292038834951456	0.382955855589751	0.877323208353109	0.67059677867144	0.867674163408372	0.889517766353925	0.411877547985953	0.00236823335942489	0.059588022199194	0.0199837532660201	0.0398885732412359	0.0180155955196095	0.0175721534503629
153	NC_037328.1:116730489:116730519	NC_037328.1	116730489	116730519	chr1	chr1:116730489:116730519	NA	transcripts;first intron;repeats;CpG-deserts;genes	31	NA	P2RY12;MED12L	NA	NA	NA	NA	0.633770317732582	0.805954480557655	0.849891067538126	0.728786926461345	0.0267206477732794	0.617257882882883	0.171825396825397	0.189916405433647	-0.503170614843625	0.0225478008159758	0.103970040060899	0.0543290186334523	0.0910170875828675	0.0448073543354006	0.0415925248775574
154	NC_037328.1:116732914:116733017	NC_037328.1	116732914	116733017	chr1	chr1:116732914:116733017	NA	transcripts;first intron;CpG-deserts;genes	104	NA	P2RY12;MED12L	NA	NA	NA	NA	0.770967741935484	0.762536314260452	0.51680881307747	0.717251883918551	0.476827094474153	0.26984126984127	0.00555555555555556	0.14175654853621	-0.468396071196192	0.0106361381413928	0.0859763571268525	0.0351028046637436	0.0647295074041939	0.030574135625627	0.0290536075843056
155	NC_037328.1:116737662:116737709	NC_037328.1	116737662	116737709	chr1	chr1:116737662:116737709	5	transcripts;first intron;repeats;CpG-deserts;genes	48	NA	P2RY12;MED12L	NA	NA	NA	NA	0.853921568627451	0.781765018607124	0.692977235530427	0.656130268199234	0.0911594202898551	0.278186274509804	0.0235017626321974	0.129073991142957	-0.615718160597356	0.000143643182107629	0.116691614908513	0.0137283102810975	0.0261711780617474	0.0124435936968542	0.0114691475095913
156	NC_037328.1:116747901:116747927	NC_037328.1	116747901	116747927	chr1	chr1:116747901:116747927	NA	transcripts;introns;repeats;CpG-deserts;genes;downstream	27	NA	MED12L	NA	NA	NA	P2RY12	0.774731182795699	0.617117117117117	0.499138804457953	0.788255360623782	0.935519652761032	0.859563002878866	0.875257452574526	0.908117692160245	0.22480383384503	0.0431592463459613	0.0230679075463586	0.0795891274183075	0.130683871980854	0.0484050751955589	0.0613225390921423
157	NC_037328.1:116755563:116755661	NC_037328.1	116755563	116755661	chr1	chr1:116755563:116755661	NA	transcripts;promoters;introns;CpG-deserts;genes	99	P2RY13	MED12L	NA	NA	NA	NA	0.555253968253968	0.813219073324337	0.769239528360196	0.919495944831022	0.0506658368019087	0.541946778711485	0.0399970262077434	0.0834872534872535	-0.585277904890283	0.00930115459349237	0.133135497426659	0.038025250188175	0.0612528116744651	0.0321858330996801	0.0274112248078227
158	NC_037328.1:116775442:116775476	NC_037328.1	116775442	116775476	chr1	chr1:116775442:116775476	3	transcripts;introns;CpG-deserts;genes	35	NA	MED12L	NA	NA	NA	NA	0.47605673949129	0.248455229749466	0.283438155136268	0.470383275261324	0.915355477855478	0.74747198964527	0.705527088884334	0.642742673992674	0.383190957684852	0.00382339386398577	0.0540086936266936	0.0221698577757149	0.0457247404275733	0.0203612418414617	0.0202026986315287
159	NC_037328.1:116777653:116777667	NC_037328.1	116777653	116777667	chr1	chr1:116777653:116777667	NA	transcripts;introns;CpG-deserts;genes	15	NA	MED12L	NA	NA	NA	NA	0.709821428571429	0.66994266994267	0.645562770562771	0.435753764055651	0.959986772486772	0.828481649069884	0.937205387205387	0.843877173510914	0.277117587285109	0.0124131149966079	0.0302395189968755	0.0370787275482146	0.068985688309004	0.0282501372448807	0.0310397704441736
160	NC_037328.1:116783620:116783685	NC_037328.1	116783620	116783685	chr1	chr1:116783620:116783685	NA	transcripts;first intron;CpG-deserts;genes	66	NA	MED12L;GPR87	NA	NA	NA	NA	0.307777777777778	0.540859044162129	0.277254491540206	0.627945402298851	0.877598816278062	0.677994080145719	0.911421911421911	0.865530303030303	0.394677098774258	0.0115571870980053	0.0620313425437924	0.0340701222363827	0.0669541688986986	0.0319774497314238	0.0300920086414855
161	NC_037328.1:116785882:116785905	NC_037328.1	116785882	116785905	chr1	chr1:116785882:116785905	NA	transcripts;first intron;CpG-deserts;genes	24	NA	MED12L;GPR87	NA	NA	NA	NA	0.910544217687075	0.752555954683614	0.751315789473684	0.811092052601487	0.274602209384818	0.588665603402446	0.180652680652681	0.100375297217402	-0.520303055947128	0.0119368536195618	0.0993604237226791	0.0367383672671466	0.0678525606953302	0.0327149051638422	0.0305174628391082
162	NC_037328.1:116790325:116790337	NC_037328.1	116790325	116790337	chr1	chr1:116790325:116790337	5	transcripts;first intron;CpG-deserts;genes	13	NA	MED12L;GPR87	NA	NA	NA	NA	0.887357962052746	0.853058458651516	0.957132027957652	0.931093126905935	0.544154619736015	0.617471619109499	0.47688060731539	0.453660313574634	-0.384118603958078	0.000297364163241055	0.0453986696715062	0.0143308501699872	0.0279779321429268	0.0126523489421575	0.0122706933019982
163	NC_037328.1:116847543:116847604	NC_037328.1	116847543	116847604	chr1	chr1:116847543:116847604	1	transcripts;exons;introns;5UTR;CpG-deserts;genes	62	NA	MED12L;P2RY14	NA	P2RY14	NA	NA	0.588854382332643	0.568121693121693	0.389942528735632	0.624116161616162	1	0.821790373369321	0.95516975308642	0.87953514739229	0.371365127010475	0.00164830868161801	0.0467636222547332	0.0185681823230571	0.0368875416382713	0.0163455304276695	0.0161961729297674
164	NC_037328.1:116889017:116889106	NC_037328.1	116889017	116889106	chr1	chr1:116889017:116889106	NA	transcripts;introns;CpG-deserts;genes	90	NA	MED12L	NA	NA	NA	NA	0.233134920634921	0.364923747276688	0.494040017028523	0.26095947063689	0.217402597402597	0.219139194139194	0.0087719298245614	0	-0.226936108552667	0.0379343124742143	0.0272559661188791	0.0652329320661424	0.121131791822737	0.0488273658541923	0.0564572784940646
165	NC_037328.1:116917278:116917339	NC_037328.1	116917278	116917339	chr1	chr1:116917278:116917339	5	transcripts;introns;CpG-deserts;genes	62	NA	MED12L	NA	NA	NA	NA	0.475367647058824	0.609369321502577	0.793169934640523	0.592643860204836	0.0145104895104895	0.115726630007855	0.021455938697318	0.00588235294117647	-0.57824383806248	0.00134931985108425	0.104052561145275	0.0183430481095315	0.0353556210522047	0.0164736199325393	0.015528301580968
166	NC_037328.1:116927578:116927627	NC_037328.1	116927578	116927627	chr1	chr1:116927578:116927627	NA	transcripts;introns;CpG-deserts;genes	50	NA	MED12L	NA	NA	NA	NA	0.627722337354092	0.805271199388847	0.869102990033223	0.762587853717396	0.0541666433063288	0.542905857221526	0.0138501599911729	0.0862936507936508	-0.59186701729522	0.0115484038252644	0.130815627653642	0.0395341515437357	0.0669449710782467	0.0364193103605032	0.0300882144343055
167	NC_037328.1:116928767:116928847	NC_037328.1	116928767	116928847	chr1	chr1:116928767:116928847	1	transcripts;introns;CpG-deserts;genes	81	NA	MED12L	NA	NA	NA	NA	0.953859447004608	0.989104220499569	0.949302847689945	0.924785059901339	0.772734511864947	0.777338067938735	0.648174603174603	0.647676767676768	-0.242781906110102	0.004131340313984	0.0194516513554043	0.0324174430667878	0.0467255944510685	0.0197172210456082	0.0206517658517508
168	NC_037328.1:116928987:116929054	NC_037328.1	116928987	116929054	chr1	chr1:116928987:116929054	6	transcripts;introns;CpG-deserts;genes	68	NA	MED12L	NA	NA	NA	NA	1	0.973431727466815	0.861445464909141	0.771639979591968	0.101487383132691	0.518459785828207	0.10073719652667	0.0335438507852301	-0.713072238923782	0.00354785040298903	0.171206677667016	0.0262767659383141	0.044757227531655	0.0223073902475891	0.0197690829759524
169	NC_037328.1:116933174:116933250	NC_037328.1	116933174	116933250	chr1	chr1:116933174:116933250	NA	transcripts;introns;CpG-deserts;genes	77	NA	MED12L	NA	NA	NA	NA	0.805980773197953	0.992106634136027	0.698163221152103	0.83996825768733	0.352839093571852	0.672309769156881	0.129543442318316	0.271288229983882	-0.47755958778562	0.0169742880598807	0.0941308400671762	0.0434968699930759	0.0794167984723582	0.0390549150023708	0.0359910475045681
170	NC_037328.1:116933952:116934024	NC_037328.1	116933952	116934024	chr1	chr1:116933952:116934024	12	transcripts;CDS;exons;CpG-deserts;genes	73	NA	MED12L	NA	NA	NA	NA	0.919914858962847	1	0.871468621052561	0.772637303508974	0.29299258903312	0.618514122578676	0.19049248541024	0.286876207666444	-0.543786344708975	0.00487271942744322	0.103323064167467	0.0253608121509936	0.0491063009603451	0.0234279731069365	0.0217481832430613
171	NC_037328.1:116962456:116962573	NC_037328.1	116962456	116962573	chr1	chr1:116962456:116962573	NA	transcripts;introns;CpG-deserts;genes	118	NA	MED12L	NA	NA	NA	NA	0.87957957957958	0.7946875	0.913639846743295	0.546870109546166	0.0710691823899371	0.611305361305361	0.082693947144075	0.142364106988783	-0.556836109510221	0.0144851909741973	0.128915958099531	0.048094578098719	0.073654028162465	0.0400143951329037	0.0332618785123578
172	NC_037328.1:116964093:116964160	NC_037328.1	116964093	116964160	chr1	chr1:116964093:116964160	3	transcripts;introns;CpG-deserts;genes	68	NA	MED12L	NA	NA	NA	NA	0.542261904761905	0.709116809116809	0.850713949074605	0.73063756953359	0.15287037037037	0.45	0.169135802469136	0.210644257703081	-0.462519950486081	0.00269641704297507	0.0762351680188551	0.0209816367385587	0.0413478537899438	0.0193175743482498	0.0182258831253561
173	NC_037328.1:116998463:116998552	NC_037328.1	116998463	116998552	chr1	chr1:116998463:116998552	NA	transcripts;first intron;CpG-deserts;genes	90	NA	MED12L	NA	NA	NA	NA	0.439351204351204	0.542719014435042	0.204019607843137	0.472715284715285	0.795819249243907	0.538035714285714	0.965723981900452	0.864141414141414	0.376228812056705	0.0194973408853969	0.0639624372348276	0.043733473156459	0.0848218385456637	0.0388582593546954	0.0385848894943468
174	NC_037328.1:117161294:117161340	NC_037328.1	117161294	117161340	chr1	chr1:117161294:117161340	2	transcripts;CDS;first exon;CpG-deserts;genes	47	NA	CLRN1	NA	NA	NA	NA	0.710526315789474	0.710987442922374	0.623376007586534	0.730202250391682	0.997267759562842	0.849830230652148	0.914035087719298	0.994444444444444	0.245121376422167	0.00189922529719817	0.0202960691473357	0.0245075961036323	0.0379260881388792	0.016289900139104	0.0166711861671091
175	NC_037328.1:117204648:117204740	NC_037328.1	117204648	117204740	chr1	chr1:117204648:117204740	NA	transcripts;CDS;exons;CpG-shores;genes	93	NA	CLRN1	NA	NA	NA	NA	0.196911480834636	0.463617376775271	0.413585334198572	0.360519480519481	0.00256410256410256	0.0442682926829268	0.031035631035631	0.0465371762740184	-0.32755711744282	0.00971440401289387	0.0365731752405454	0.0309824829086978	0.0623056194686005	0.0268321234469955	0.0279077044222981
176	NC_037328.1:117277170:117277266	NC_037328.1	117277170	117277266	chr1	chr1:117277170:117277266	7	repeats;CpG-deserts;inter	97	NA	NA	NA	NA	NA	NA	0.824714075777906	0.827393047204368	0.899956275891713	0.900261437908497	0.336508248232522	0.403325855499769	0.207273320287019	0.0630952380952381	-0.610530543666984	0.0025080084593302	0.116958334552144	0.0220696335984926	0.0405369965949024	0.0191807612211225	0.0178685916088573
177	NC_037328.1:117279029:117279096	NC_037328.1	117279029	117279096	chr1	chr1:117279029:117279096	NA	CpG-deserts;inter	68	NA	NA	NA	NA	NA	NA	0.464288013265364	0.324215024741341	0.159773798997937	0.43874844568343	0.959939913887282	0.592398908175607	0.703198329294367	0.881873628519058	0.43759637429706	0.0073749327991208	0.0749287840168539	0.0291439870453941	0.056331089038166	0.0260633000778725	0.0250938461558675
178	NC_037328.1:117279197:117279244	NC_037328.1	117279197	117279244	chr1	chr1:117279197:117279244	NA	CpG-deserts;inter	48	NA	NA	NA	NA	NA	NA	0.167454638384871	0.428260357815443	0.174455825864277	0.413299663299663	0.919539321104786	0.495519100782259	0.801587301587302	0.581792717086835	0.403741988799232	0.0179618138282718	0.0718380442968631	0.0427780306517275	0.0816904965817744	0.0396845858084061	0.0370741424307047
179	NC_037328.1:117300439:117300476	NC_037328.1	117300439	117300476	chr1	chr1:117300439:117300476	1	repeats;CpG-deserts;inter	38	NA	NA	NA	NA	NA	NA	0.118055555555556	0.451939203354298	0.416447368421053	0.358320292123109	0.943094126888776	0.781143162393163	0.885334931705899	0.814608555286521	0.519854589205086	0.00261194703936054	0.0891674016568484	0.0210066658572418	0.0409339440228906	0.0190596843724817	0.0180458646196448
180	NC_037328.1:117330379:117330396	NC_037328.1	117330379	117330396	chr1	chr1:117330379:117330396	3	repeats;CpG-deserts;inter	18	NA	NA	NA	NA	NA	NA	0.660546827426623	0.650896995934745	0.710479154876438	0.390865316275764	0.0612277738831177	0.21202380952381	0.00192307692307692	0.338836050724638	-0.449694395864732	0.00514348961897678	0.0765532588004493	0.0257672654723059	0.0498499990440385	0.0232356516065319	0.0220971436847204
181	NC_037328.1:117330522:117330548	NC_037328.1	117330522	117330548	chr1	chr1:117330522:117330548	NA	repeats;CpG-deserts;inter	27	NA	NA	NA	NA	NA	NA	0.708823529411765	0.811092052601487	0.950266597867217	0.597724612232953	0.0545808966861598	0.628450972392221	0.0947603121516165	0.281565656565657	-0.502137238579442	0.0222919728089253	0.111068814538574	0.0539711902413802	0.0905201017592979	0.046985310349454	0.0413547506198305
182	NC_037328.1:117370648:117370721	NC_037328.1	117370648	117370721	chr1	chr1:117370648:117370721	NA	transcripts;first intron;CpG-deserts;genes	74	NA	SIAH2	NA	NA	NA	NA	0.683245614035088	0.440526315789474	0.359101146601147	0.457727272727273	0.915241360473808	0.609205260148656	0.796662950575994	0.675657570277824	0.264041698080825	0.034459278543292	0.0360198546440597	0.0584191630205315	0.1146447882986	0.0485184300512546	0.0532104030731297
183	NC_037328.1:117370859:117370917	NC_037328.1	117370859	117370917	chr1	chr1:117370859:117370917	NA	transcripts;first intron;CpG-deserts;genes	59	NA	SIAH2	NA	NA	NA	NA	0.465058410188845	0.480433980026951	0.273129890453834	0.527975357975358	0.86769627535585	0.538305681246858	0.773069734004314	0.744740317666277	0.294303592407078	0.0175198696368917	0.0384011504438923	0.0408815483252497	0.0806925118972838	0.0353414849728521	0.0365947983099354
184	NC_037328.1:117370992:117371055	NC_037328.1	117370992	117371055	chr1	chr1:117370992:117371055	NA	transcripts;first intron;CpG-deserts;genes	64	NA	SIAH2	NA	NA	NA	NA	0.613150738150738	0.334848484848485	0.22770154373928	0.693162393162393	0.927884615384615	0.698409090909091	0.968055555555556	0.975038759689922	0.425131215409572	0.0222488880094225	0.0800221002904629	0.0480529579283914	0.0904329757549338	0.0450877033383712	0.0413111181741555
185	NC_037328.1:117374777:117374826	NC_037328.1	117374777	117374826	chr1	chr1:117374777:117374826	5	transcripts;first intron;CpG-deserts;genes	50	NA	SIAH2	NA	NA	NA	NA	0.192156862745098	0.0922917662048097	0.0621498599439776	0.0333333333333333	0.717752234993614	0.537061087061087	0.867850365952833	0.452861952861953	0.548898454660567	0.00596354792932544	0.102917961756804	0.0291260263687277	0.0524069121987346	0.0247908557091674	0.02326337326511
186	NC_037328.1:117381072:117381161	NC_037328.1	117381072	117381161	chr1	chr1:117381072:117381161	NA	CpG-deserts;inter;downstream	90	NA	NA	NA	NA	NA	SIAH2	0.592144268774703	0.561261261261261	0.567480294940249	0.787282338308458	0.93979381443299	0.687557471264368	0.964696223316913	0.84004329004329	0.230980658943223	0.0323530096683335	0.0269887226712778	0.0714194803863508	0.110566631922516	0.0419249360685237	0.0511934735382527
187	NC_037328.1:117390260:117390328	NC_037328.1	117390260	117390328	chr1	chr1:117390260:117390328	3	CpG-deserts;inter	69	NA	NA	NA	NA	NA	NA	0.229645390070922	0.141775136766648	0.26125730994152	0.275766716943187	0.910923753665689	0.671945519019987	0.784090909090909	0.914862914862915	0.593344635729306	0.000465680174226137	0.107916079754698	0.0153190452170818	0.0295498651389409	0.0138201856569527	0.0129541640993904
188	NC_037328.1:117390620:117390654	NC_037328.1	117390620	117390654	chr1	chr1:117390620:117390654	4	CpG-deserts;inter	35	NA	NA	NA	NA	NA	NA	0.374160206718346	0.370879120879121	0.276773383553045	0.380731922398589	0.886943321304871	0.692859441275413	0.924657042304101	0.652369560264297	0.438571182899895	0.0045604075656636	0.0639886324694183	0.0243896578118262	0.047988231698851	0.022461770363754	0.0212319775385315
189	NC_037328.1:117410515:117410597	NC_037328.1	117410515	117410597	chr1	chr1:117410515:117410597	6	repeats;CpG-deserts;inter	83	NA	NA	NA	NA	NA	NA	0.0319548872180451	0.0675862068965517	0.0318367346938776	0.0729302955109407	0.491163245356794	0.309297552180847	0.601428571428571	0.539166666666667	0.434186977828366	0.00533815822806982	0.0608459034082321	0.0252681741772855	0.0504435383186961	0.0230212922236309	0.0223661136715973
190	NC_037328.1:117410679:117410727	NC_037328.1	117410679	117410727	chr1	chr1:117410679:117410727	3	repeats;CpG-deserts;inter	49	NA	NA	NA	NA	NA	NA	0.324310776942356	0.20343137254902	0.212725259236887	0.472676033976344	0.701508760967482	0.793103448275862	0.932936507936508	0.788447971781305	0.500713311564138	0.00093571882610591	0.082317791082518	0.0169744332212882	0.0329779197477079	0.0152252315988479	0.0144635370363243
191	NC_037328.1:117500509:117500611	NC_037328.1	117500509	117500611	chr1	chr1:117500509:117500611	2	repeats;CpG-deserts;inter	103	NA	NA	NA	NA	NA	NA	0.428571428571429	0.5	0.2	0.5	0.846153846153846	0.727272727272727	0.9	0.666666666666667	0.377880452880453	0.00636259857952641	0.0543570749652168	0.0258274931198723	0.0535041383278087	0.0235197644834875	0.0237820283868039
192	NC_037328.1:117507109:117507133	NC_037328.1	117507109	117507133	chr1	chr1:117507109:117507133	4	CpG-deserts;inter;downstream	25	NA	NA	NA	NA	NA	SELENOT	0.388837535014006	0.314809523809524	0.200119796346211	0.517025210084034	0.948110354430931	0.694806763285024	0.913175093598924	0.634521493952272	0.442455410003344	0.00531079918594644	0.0739579612089154	0.0261333286952367	0.0503464273236101	0.023681158057727	0.0223212136574198
193	NC_037328.1:117507109:117507205	NC_037328.1	117507109	117507205	chr1	chr1:117507109:117507205	NA	CpG-deserts;inter;downstream	97	NA	NA	NA	NA	NA	SELENOT	0.277777777777778	0.441269841269841	0.685185185185185	0.463492063492063	1	0.681444991789819	0.75	0.725146198830409	0.32221658072384	0.0272407448125404	0.050488357472061	0.0481374303398429	0.100399048070834	0.0443853075659151	0.0461764209283262
194	NC_037328.1:117520947:117520988	NC_037328.1	117520947	117520988	chr1	chr1:117520947:117520988	NA	transcripts;first intron;repeats;CpG-deserts;genes	42	NA	SELENOT	NA	NA	NA	NA	0.32378079436903	0.57008547008547	0.55893665158371	0.694496044031648	0.953069153069153	0.899723905207455	0.923463356973995	0.621695487974558	0.312663235788826	0.0284435613972775	0.0482820367328672	0.0531227360331133	0.102858074290589	0.0469746214858635	0.047384820381178
195	NC_037328.1:117521326:117521433	NC_037328.1	117521326	117521433	chr1	chr1:117521326:117521433	6	transcripts;first intron;repeats;CpG-deserts;genes	108	NA	SELENOT	NA	NA	NA	NA	0.567371517806846	0.683437707563909	0.469356998306151	0.542665099259169	0.971166460219738	0.888024484695651	0.947476597476598	0.856094852408217	0.349982767966032	0.00116598786947426	0.0395797722360733	0.0173213938059488	0.0343474572050189	0.0152238387421432	0.0150785744094206
196	NC_037328.1:117611102:117611183	NC_037328.1	117611102	117611183	chr1	chr1:117611102:117611183	NA	repeats;CpG-deserts;inter	82	NA	NA	NA	NA	NA	NA	0.734910980287218	0.598016700044869	0.913790478403574	0.865555555555556	0.00898462671453558	0.414288826641768	0.495396825396825	0.264497674610034	-0.482276440232014	0.0121936716819992	0.0946654543586421	0.0365237737275819	0.0684493555466955	0.0330465959322161	0.0307921625675095
197	NC_037328.1:117664583:117664652	NC_037328.1	117664583	117664652	chr1	chr1:117664583:117664652	5	CpG-deserts;inter	70	NA	NA	NA	NA	NA	NA	0.512523540489642	0.564128225418548	0.321461187214612	0.399708953946242	0.897945845004669	0.725798966815515	0.877380952380952	0.649283899283899	0.338146939103998	0.00603197193594465	0.0439798451147804	0.0270458492677605	0.0525995318128848	0.0227005681042946	0.0233510340885981
198	NC_037328.1:117697395:117697483	NC_037328.1	117697395	117697483	chr1	chr1:117697395:117697483	NA	transcripts;introns;CpG-deserts;genes	89	NA	TSC22D2	NA	NA	NA	NA	0.490530303030303	0.595783926218709	0.55969387755102	0.261513157894737	0.896660149885956	0.825242514151043	0.87496298689063	0.804987212276215	0.373582899627269	0.0122384578354333	0.0503046287735006	0.0346525333766696	0.0685592850259758	0.0307920120009073	0.0308446923288657
199	NC_037328.1:117705719:117705823	NC_037328.1	117705719	117705823	chr1	chr1:117705719:117705823	NA	transcripts;first intron;CpG-deserts;genes	105	NA	TSC22D2	NA	NA	NA	NA	0.346666666666667	0.568817204301075	0.630555555555556	0.696759259259259	0.985922574157868	0.928648454349389	0.973015873015873	0.914650013010669	0.389859557187811	0.0121328515123866	0.053824778142355	0.0333492994729597	0.0683038909346447	0.0306820957741096	0.030723592249681
200	NC_037328.1:1177240:1177268	NC_037328.1	1177240	1177268	chr1	chr1:1177240:1177268	NA	CpG-deserts;inter	29	NA	NA	NA	NA	NA	NA	0.71796918767507	0.554765562138834	0.381601731601732	0.295184715395592	0.921906436273525	0.668872939925572	1	0.908333333333333	0.3873978781803	0.0185450428685023	0.0667741402760839	0.041928518242293	0.0828700623370314	0.0405948229015594	0.0376422921324401
201	NC_037328.1:1177432:1177524	NC_037328.1	1177432	1177524	chr1	chr1:1177432:1177524	8	CpG-deserts;inter	93	NA	NA	NA	NA	NA	NA	0.546270102053235	0.3734101579172	0.311514494452258	0.321266427718041	0.90415387706527	0.822838468720822	0.868019692725575	0.73029043029043	0.443210321665341	0.000870799204716227	0.0636238525014764	0.0166127436111485	0.0327951774533681	0.0148839721232806	0.0143711266559774
202	NC_037328.1:117868870:117868936	NC_037328.1	117868870	117868936	chr1	chr1:117868870:117868936	2	CpG-deserts;inter	67	NA	NA	NA	NA	NA	NA	0.545	0.589166666666667	0.2137856346552	0.484659090909091	1	0.754777777777778	1	0.905769230769231	0.456983904079013	0.00567041412939661	0.0775714049039451	0.0261116821995582	0.0513662241267901	0.0237992385454046	0.0227958259295877
203	NC_037328.1:117893975:117894028	NC_037328.1	117893975	117894028	chr1	chr1:117893975:117894028	2	CpG-deserts;inter	54	NA	NA	NA	NA	NA	NA	0.598217664260151	0.419797345511631	0.491832043162092	0.457161939457021	0.67531421879248	0.636526482886669	0.800086215978588	0.757354861136374	0.225568196600804	0.00563496111884911	0.0194594322820901	0.0369348774435523	0.0513042041058443	0.021641672027587	0.0227659976626107
204	NC_037328.1:117893978:117894060	NC_037328.1	117893978	117894060	chr1	chr1:117893978:117894060	NA	CpG-deserts;inter	83	NA	NA	NA	NA	NA	NA	0	0	0.333333333333333	0.428571428571429	1	0.444444444444444	0.8	1	0.620634920634921	0.0117831495448715	0.160851599899219	0.0435488543827248	0.0674913544657367	0.036784832297387	0.0303435367131322
205	NC_037328.1:117908013:117908070	NC_037328.1	117908013	117908070	chr1	chr1:117908013:117908070	NA	repeats;CpG-deserts;inter	58	NA	NA	NA	NA	NA	NA	0.211827668455575	0.392783895560317	0.327255411255411	0.496508563899868	0.841021703521703	0.84078104993598	0.674345099345099	0.467004329004329	0.348694160658985	0.0208836349669888	0.0543422355316291	0.0419666973204106	0.0877078879920931	0.0385979675167552	0.0399857388333275
206	NC_037328.1:117925094:117925122	NC_037328.1	117925094	117925122	chr1	chr1:117925094:117925122	1	CpG-deserts;inter	29	NA	NA	NA	NA	NA	NA	0.374199134199134	0.590280821717659	0.380581736030216	0.434425287356322	0.851721665810649	0.629357874227915	0.898095238095238	0.73974358974359	0.334857847143515	0.00564048030656751	0.0425777322251981	0.0254868210830266	0.0513189279342956	0.0222023541992047	0.0227719563199037
207	NC_037328.1:117925551:117925660	NC_037328.1	117925551	117925660	chr1	chr1:117925551:117925660	3	CpG-deserts;inter	110	NA	NA	NA	NA	NA	NA	0.428395061728395	0.336743800599222	0.55880123193556	0.6125	0.960470085470086	0.783887429416916	0.952314814814815	0.808913308913309	0.392286386087987	0.00297643593386535	0.0543721154625583	0.0209733797607637	0.0425177222208196	0.0189925418619086	0.0187399969434612
208	NC_037328.1:117935930:117935952	NC_037328.1	117935930	117935952	chr1	chr1:117935930:117935952	NA	CpG-deserts;inter	23	NA	NA	NA	NA	NA	NA	0.664903846153846	0.361077338736913	0.492989668985874	0.56712962962963	0.878343627439468	0.665450408035154	0.842253487933635	0.646164021164021	0.236527765266504	0.0355864387285996	0.0291056716020536	0.0691235981140935	0.116750765747678	0.046669685955843	0.054282992804255
209	NC_037328.1:117942249:117942305	NC_037328.1	117942249	117942305	chr1	chr1:117942249:117942305	3	repeats;CpG-deserts;inter	57	NA	NA	NA	NA	NA	NA	0.572298953251334	0.484006734006734	0.591269841269841	0.736904761904762	0.962678062678063	0.957661290322581	0.854740175777224	0.980772735556771	0.342842993475492	0.00287275717760314	0.039688129231543	0.0210961252048024	0.042164611308977	0.0182519717823979	0.0185848942697155
210	NC_037328.1:117960112:117960143	NC_037328.1	117960112	117960143	chr1	chr1:117960112:117960143	NA	CpG-deserts;inter	32	NA	NA	NA	NA	NA	NA	0.81230616158327	0.709284839079145	0.559434697855751	0.56235970250169	0.906590269086358	0.787430555555556	0.933543105854093	0.827770696577656	0.202987306513452	0.0368881957712704	0.0202147862925376	0.116469236453503	0.119173089207869	0.0487361693153447	0.05548997482716
211	NC_037328.1:117993012:117993096	NC_037328.1	117993012	117993096	chr1	chr1:117993012:117993096	2	repeats;CpG-deserts;inter	85	NA	NA	NA	NA	NA	NA	0.883333333333333	0.825441120061373	0.787048877522023	0.686355311355311	0.16734693877551	0.53030303030303	0.164064064064064	0.31175274988044	-0.502177964812249	0.00507597096991925	0.0877196545256955	0.0264199832866139	0.0496520466568177	0.0234520004986068	0.0220021263612219
212	NC_037328.1:118139973:118140021	NC_037328.1	118139973	118140021	chr1	chr1:118139973:118140021	NA	CpG-deserts;inter	49	NA	NA	NA	NA	NA	NA	0.346960167714885	0.220009317493594	0.258547008547009	0.573751451800232	0.750445212654515	0.558751611486534	0.708722228956346	0.660984848484849	0.319908989006631	0.0188557635267022	0.0429209411808434	0.0433988506030106	0.0835380195120756	0.0352137330671296	0.0379677298120698
213	NC_037328.1:118142105:118142148	NC_037328.1	118142105	118142148	chr1	chr1:118142105:118142148	NA	CpG-deserts;inter	44	NA	NA	NA	NA	NA	NA	0.559752567693744	0.457374857066613	0.318799522843333	0.487236808945954	0.920299528394585	0.570433846663355	0.928664441743259	0.740629013580539	0.334215768458023	0.0204635832181409	0.0486884234230392	0.0441126348379791	0.0868094590908714	0.0381925254460781	0.0395594032202457
214	NC_037328.1:118158417:118158465	NC_037328.1	118158417	118158465	chr1	chr1:118158417:118158465	2	CpG-deserts;inter	49	NA	NA	NA	NA	NA	NA	0.393105590062112	0.440791986955509	0.327109788359788	0.408215488215488	0.795852480852481	0.649053156146179	0.73199826130154	0.713271578976882	0.330238155921046	0.0001821596404332	0.0337028665283334	0.0136649043144711	0.0267621483723103	0.0120703002623651	0.0117565692851602
215	NC_037328.1:118184056:118184081	NC_037328.1	118184056	118184081	chr1	chr1:118184056:118184081	NA	repeats;CpG-deserts;inter	26	NA	NA	NA	NA	NA	NA	0.705860805860806	0.64891975308642	0.644609961774141	0.813903743315508	0.926847928436911	0.876103652636671	0.936399371069182	0.887257669866365	0.203328589493064	0.0094651884360939	0.0148469470244668	0.0902224632451539	0.0616427739827073	0.0256570754778768	0.0275909556886883
216	NC_037328.1:118389358:118389412	NC_037328.1	118389358	118389412	chr1	chr1:118389358:118389412	3	CpG-deserts;inter	55	NA	NA	NA	NA	NA	NA	0.496081277213353	0.45982905982906	0.363085774850481	0.7	0.874267255356831	0.789157329598506	0.975472813238771	0.949522325899315	0.392355903050132	0.00539620895412125	0.0556048592074765	0.0250032741316947	0.0506552318000383	0.022754230921743	0.022460289359723
217	NC_037328.1:118421405:118421480	NC_037328.1	118421405	118421480	chr1	chr1:118421405:118421480	4	CpG-deserts;inter	76	NA	NA	NA	NA	NA	NA	0.579818594104308	0.36969696969697	0.320585077831455	0.462049062049062	0.658121219502294	0.685192433137639	0.911444815226795	0.802113695943097	0.331180615032008	0.00661969314552892	0.042716930834041	0.0280253701592471	0.0542801934811957	0.0234279731069365	0.0241331490213764
218	NC_037328.1:118497639:118497667	NC_037328.1	118497639	118497667	chr1	chr1:118497639:118497667	NA	transcripts;first intron;CpG-islands;genes	29	NA	WWTR1	NA	NA	NA	NA	0.5	0.080952380952381	0	0.0779220779220779	0.936111111111111	0.845238095238095	0.828282828282828	0.476190476190476	0.606737012987013	0.00736194197259496	0.144760282440352	0.0347305194681643	0.056302434906338	0.0293985196907516	0.0250802404531192
219	NC_037328.1:118497792:118497830	NC_037328.1	118497792	118497830	chr1	chr1:118497792:118497830	4	transcripts;first intron;CpG-shores;genes	39	NA	WWTR1	NA	NA	NA	NA	0.281601731601732	0.372211779448622	0.301922359089212	0.322928279450019	0.633333333333333	0.666896551724138	0.679059829059829	0.578947368421053	0.319893233237192	4.27482788117335e-05	0.03074556772956	0.012600649688457	0.0245176769377293	0.0113378469747453	0.0106516178758721
220	NC_037328.1:118498271:118498321	NC_037328.1	118498271	118498321	chr1	chr1:118498271:118498321	NA	transcripts;first intron;CpG-shores;genes	51	NA	WWTR1	NA	NA	NA	NA	0.513256584685156	0.242865896358543	0.360714285714286	0.352130325814536	0.83319209039548	0.688947091465748	0.779032151581171	0.457732082732083	0.32248408090049	0.0216137448455609	0.0467760721239843	0.0453604294557862	0.0892143961894209	0.0393125306678314	0.040717779169819
221	NC_037328.1:118498931:118498966	NC_037328.1	118498931	118498966	chr1	chr1:118498931:118498966	NA	transcripts;first intron;CpG-shores;genes	36	NA	WWTR1	NA	NA	NA	NA	0.76319320214669	0.411227106227106	0.455281986531987	0.549019607843137	0.835941653375864	0.698534798534798	0.948296936114733	0.786074740861975	0.272531556534613	0.0322019116108245	0.0363861853480702	0.0553548246957403	0.11030056290775	0.0489079101208731	0.0510605698439618
222	NC_037328.1:118529933:118529957	NC_037328.1	118529933	118529957	chr1	chr1:118529933:118529957	NA	transcripts;first intron;CpG-deserts;genes	25	NA	WWTR1	NA	NA	NA	NA	0.556216931216931	0.460273535203023	0.203947368421053	0.426125478927203	0.732938114517062	0.669817927170868	0.942326272761055	0.666359447004608	0.341219611921346	0.0140109553738489	0.0500211566825434	0.0349328447382062	0.0726193305592693	0.0326456942803826	0.0327689211320311
223	NC_037328.1:118530861:118530901	NC_037328.1	118530861	118530901	chr1	chr1:118530861:118530901	NA	transcripts;first intron;CpG-deserts;genes	41	NA	WWTR1	NA	NA	NA	NA	0.504852013446821	0.54151593453919	0.4240837621498	0.30689385241624	0.958703431372549	0.755532940490568	0.770129882230173	0.626523297491039	0.333385997258069	0.00934836665066015	0.0444091988173444	0.0317074000983538	0.0613702181117295	0.0265066450361282	0.0274652947336641
224	NC_037328.1:118551792:118551832	NC_037328.1	118551792	118551832	chr1	chr1:118551792:118551832	4	transcripts;first intron;CpG-deserts;genes	41	NA	WWTR1	NA	NA	NA	NA	0.534702093397745	0.555026455026455	0.328265291806959	0.34795008912656	0.931647052413643	0.709388404593884	0.942501105216622	0.706426834659593	0.381004866881506	0.0054047254255088	0.0551512206076721	0.0250138185891424	0.0506623915563948	0.0222621070210029	0.0224633821493465
225	NC_037328.1:118559539:118559583	NC_037328.1	118559539	118559583	chr1	chr1:118559539:118559583	1	transcripts;first intron;repeats;CpG-deserts;genes	45	NA	WWTR1	NA	NA	NA	NA	0.465007215007215	0.359090909090909	0.478174603174603	0.406355218855219	0.852222222222222	0.598484848484849	0.694805194805195	0.78659188034188	0.30586904993155	0.00601322373404463	0.0332645838831254	0.0263071151352107	0.0525555008430175	0.0218043744236386	0.0233267896083812
226	NC_037328.1:118559682:118559732	NC_037328.1	118559682	118559732	chr1	chr1:118559682:118559732	8	transcripts;first intron;repeats;CpG-deserts;genes	51	NA	WWTR1	NA	NA	NA	NA	0.532835657429683	0.508889757453369	0.318599143225265	0.527416683363387	0.741203523406913	0.732692065686252	0.907993050258497	0.76513642386241	0.314820955435592	0.00344955626002421	0.0357218399775097	0.022043405005795	0.044447414496811	0.0189918219130906	0.0196286247727616
227	NC_037328.1:118603685:118603744	NC_037328.1	118603685	118603744	chr1	chr1:118603685:118603744	NA	transcripts;introns;CpG-deserts;genes	60	NA	WWTR1	NA	NA	NA	NA	0.461743231892486	0.504098360655738	0.301150603782183	0.456349206349206	0.875322108087119	0.638787826287826	0.730246913580247	0.604468798066359	0.281371060835485	0.0111689216527741	0.0322944394433606	0.037453029752343	0.0660549118547116	0.0269293933088862	0.0296649565669249
228	NC_037328.1:118603992:118604076	NC_037328.1	118603992	118604076	chr1	chr1:118603992:118604076	NA	transcripts;introns;CpG-deserts;genes	85	NA	WWTR1	NA	NA	NA	NA	0.269883711060182	0.196111111111111	0.275413711583924	0.347222222222222	1	0.689121176926055	0.75702614379085	0.583333333333333	0.4852124745182	0.00802551041356068	0.0823017040005395	0.0301233934194305	0.0579627831285767	0.0277887128413732	0.0258631227308027
229	NC_037328.1:118604178:118604257	NC_037328.1	118604178	118604257	chr1	chr1:118604178:118604257	3	transcripts;introns;CpG-deserts;genes	80	NA	WWTR1	NA	NA	NA	NA	0.2937552213868	0.493379874819451	0.312527162103433	0.384489795918367	0.96081041112097	0.753125888036374	0.78547150171011	0.634090909090909	0.412336663932578	0.00336974357578954	0.0598965927181731	0.0218931718171606	0.0441212516720412	0.0197239797495948	0.0194771558833852
230	NC_037328.1:118609704:118609812	NC_037328.1	118609704	118609812	chr1	chr1:118609704:118609812	7	transcripts;introns;CpG-deserts;genes	109	NA	WWTR1	NA	NA	NA	NA	0.463807824646362	0.196123488628232	0.393249734002128	0.34569325422984	0.83108712475522	0.716080586080586	0.743380638968874	0.716818181818182	0.402123057529075	0.00236240106514039	0.0529688300342621	0.0201268165756275	0.0398421732578551	0.0179360318693233	0.0175500071739548
231	NC_037328.1:118612701:118612755	NC_037328.1	118612701	118612755	chr1	chr1:118612701:118612755	NA	transcripts;introns;CpG-deserts;genes	55	NA	WWTR1	NA	NA	NA	NA	0.0555555555555556	0.25	0.666666666666667	0.441269841269841	0.861111111111111	0.972222222222222	1	0.833333333333333	0.563293650793651	0.0184186384657773	0.12284588372386	0.0499248204804383	0.0825951987336639	0.040555359799225	0.0375074089495138
232	NC_037328.1:118619194:118619248	NC_037328.1	118619194	118619248	chr1	chr1:118619194:118619248	3	transcripts;introns;CpG-deserts;genes	55	NA	WWTR1	NA	NA	NA	NA	0.570402298850575	0.39781746031746	0.325225225225225	0.405164449371766	0.834194756554307	0.611903716710565	0.859198209198209	0.786612021857924	0.348324817638995	0.00383913286503704	0.0446001820737566	0.0234352638620079	0.0457789255956176	0.0199353364094935	0.020227249451634
233	NC_037328.1:118767170:118767229	NC_037328.1	118767170	118767229	chr1	chr1:118767170:118767229	NA	CpG-deserts;inter	60	NA	NA	NA	NA	NA	NA	0.646825396825397	0.422222222222222	0.291605571847507	0.324074074074074	0.798992673992674	0.592283012495778	0.976666666666667	0.728619107217355	0.352958548850818	0.020675706394086	0.0575820458165984	0.0434912570454485	0.087217112102955	0.0407127298508148	0.0397543479109892
234	NC_037328.1:118809722:118809743	NC_037328.1	118809722	118809743	chr1	chr1:118809722:118809743	NA	transcripts;CDS;first exon;CpG-deserts;genes	22	NA	TM4SF1	NA	NA	NA	NA	0.263860698643307	0.083974358974359	0.0768563034188034	0.323860727086534	0.360501126126126	0.548821339950372	0.478798280285694	0.413690476190476	0.263314783607416	0.0162161891014064	0.0294251749344581	0.0408399831553605	0.0776502880343355	0.0315701093118048	0.0351531888890137
235	NC_037328.1:118810192:118810262	NC_037328.1	118810192	118810262	chr1	chr1:118810192:118810262	NA	transcripts;first intron;CpG-deserts;genes	71	NA	TM4SF1	NA	NA	NA	NA	0.166666666666667	0.285714285714286	0	0	0.333333333333333	0.470588235294118	0.555555555555556	0.333333333333333	0.310107376283847	0.0140125363055643	0.0409281632042796	0.0372924511282658	0.0726193305592693	0.0312088497160191	0.0327696744033609
236	NC_037328.1:118848636:118848666	NC_037328.1	118848636	118848666	chr1	chr1:118848636:118848666	NA	CpG-deserts;inter	31	NA	NA	NA	NA	NA	NA	0.468915343915344	0.495825200607244	0.165172735760971	0.637591081089533	0.993710691823899	0.79022455291112	0.646739397513391	0.824296788482835	0.371866767339538	0.0257802316754974	0.0651462271748132	0.0514737709345509	0.0975103440078181	0.0487376390697787	0.0447599466630287
237	NC_037328.1:118848636:118848720	NC_037328.1	118848636	118848720	chr1	chr1:118848636:118848720	5	CpG-deserts;inter	85	NA	NA	NA	NA	NA	NA	0.25	0	0.153846153846154	0.428571428571429	0.833333333333333	0.833333333333333	0.833333333333333	0.833333333333333	0.625228937728937	0.00606502151245383	0.125490685672691	0.0321766644695415	0.0526974417568668	0.0274342203072416	0.0233964294978349
238	NC_037328.1:118899054:118899133	NC_037328.1	118899054	118899133	chr1	chr1:118899054:118899133	1	repeats;CpG-deserts;inter	80	NA	NA	NA	NA	NA	NA	0.658026755852843	0.680555555555555	0.493672993672994	0.589968511021143	0.983528304423827	0.765718157181572	0.936692506459948	0.881776729559748	0.28637297038064	0.00401936111461107	0.0302263280459305	0.0240228137209021	0.0464166446952736	0.0193372725045651	0.0205056611524577
239	NC_037328.1:118922630:118922692	NC_037328.1	118922630	118922692	chr1	chr1:118922630:118922692	0	CpG-deserts;inter	63	NA	NA	NA	NA	NA	NA	0.400050607287449	0.265539779130043	0.184680134680135	0.487884160756501	0.839324618736383	0.734970238095238	0.806476569407604	0.645987981618947	0.422151181501011	0.00314362402849473	0.0619260269621774	0.0219061389903758	0.0432506454227918	0.0193382083684251	0.0190765441746397
240	NC_037328.1:119005760:119005793	NC_037328.1	119005760	119005793	chr1	chr1:119005760:119005793	NA	transcripts;CDS;exons;CpG-deserts;genes;downstream	34	NA	HPS3	NA	NA	NA	CP	0.57967032967033	0.77938808373591	0.42111631537861	0.555971479500891	0.987743950039032	0.942010073260073	0.839494328122354	0.833260592835061	0.316590683992695	0.0152918479947213	0.040506945306802	0.0375411721880013	0.0755165101714059	0.0319163626904109	0.0341356113138284
241	NC_037328.1:119033714:119033788	NC_037328.1	119033714	119033788	chr1	chr1:119033714:119033788	NA	transcripts;introns;repeats;CpG-deserts;genes	75	NA	HPS3	NA	NA	NA	NA	0.895502645502645	0.850500556173526	0.846925451092118	0.654388714733542	0.31119420702754	0.593187999837616	0.0573870573870574	0.319084967320261	-0.491615783982339	0.0131710766083543	0.0945090811947417	0.0377953822624938	0.0708094089920135	0.0339929427554004	0.0318948171375079
242	NC_037328.1:119065008:119065037	NC_037328.1	119065008	119065037	chr1	chr1:119065008:119065037	5	repeats;CpG-deserts;inter	30	NA	NA	NA	NA	NA	NA	0.609365079365079	0.715311355311355	0.767272727272727	0.778705734493211	0.352060304140915	0.425734265734266	0.202947937795808	0.389594946116685	-0.375079360663674	0.00114942183259555	0.0468574842663882	0.017258673071835	0.0342744058950095	0.0152854789865337	0.0150511299535237
243	NC_037328.1:119170054:119170121	NC_037328.1	119170054	119170121	chr1	chr1:119170054:119170121	NA	transcripts;introns;CpG-deserts;genes	68	NA	GYG1	NA	NA	NA	NA	0.597258297258297	0.360265774463035	0.291293672624797	0.294631366059937	0.745915993295771	0.542428764574116	0.77659494927575	0.746844513949777	0.317083777672337	0.0142780242493399	0.0426653504203621	0.0363143665043201	0.0732153612941303	0.0314666130626395	0.0330549221958297
244	NC_037328.1:119170304:119170373	NC_037328.1	119170304	119170373	chr1	chr1:119170304:119170373	NA	transcripts;introns;repeats;CpG-deserts;genes	70	NA	GYG1	NA	NA	NA	NA	0.223669467787115	0.555072463768116	0.36701919310615	0.455776831280457	0.947139938712972	0.679353979353979	0.859288097886541	0.670098039215686	0.388585524806835	0.00744862096808354	0.0596348746340229	0.0281294944025485	0.0564762864046487	0.0254950674467266	0.0251621101649215
245	NC_037328.1:119176721:119176756	NC_037328.1	119176721	119176756	chr1	chr1:119176721:119176756	NA	transcripts;introns;CpG-deserts;genes	36	NA	GYG1	NA	NA	NA	NA	0.431637931034483	0.591787485212314	0.244930360337337	0.39672619047619	0.886612576064909	0.506005625879044	0.74353264143795	0.912903361977989	0.345993059574892	0.0277003033035452	0.0577683131319127	0.0512892344939254	0.101363990617702	0.0469992489161792	0.0466472698643825
246	NC_037328.1:119176882:119176893	NC_037328.1	119176882	119176893	chr1	chr1:119176882:119176893	2	transcripts;introns;repeats;CpG-deserts;genes	12	NA	GYG1	NA	NA	NA	NA	0.33106960950764	0.153679653679654	0.386309523809524	0.413543328017012	0.929076479076479	0.598296554394115	0.907041428780559	0.716450216450216	0.466565640921885	0.00396792316748209	0.0787819831440071	0.0234344767059784	0.0462421972210361	0.0217602607776052	0.0204283342153228
247	NC_037328.1:119182431:119182497	NC_037328.1	119182431	119182497	chr1	chr1:119182431:119182497	5	transcripts;introns;CpG-deserts;genes	67	NA	GYG1	NA	NA	NA	NA	0.769773482331622	0.710202143535477	0.690860215053763	0.619149512459372	0.26472706155633	0.315230470748763	0.0586332767402377	0.142412761714855	-0.502245445655012	0.000913082944403757	0.0795352771305341	0.0166847807281957	0.0329244909893139	0.0152759963311314	0.0144300375702372
248	NC_037328.1:119255781:119255796	NC_037328.1	119255781	119255796	chr1	chr1:119255781:119255796	0	CpG-deserts;inter	16	NA	NA	NA	NA	NA	NA	0.671982987772461	0.528441275500099	0.651700680272109	0.704691075514874	1	0.947474747474747	0.970893231506439	0.807501341921632	0.292263325460819	0.0023286564583484	0.0300711717507938	0.0205801422586292	0.0397565826773153	0.0169220914572272	0.0175108259529774
249	NC_037328.1:119329458:119329495	NC_037328.1	119329458	119329495	chr1	chr1:119329458:119329495	4	transcripts;CDS;first exon;CpG-deserts;genes	38	NA	CPA3	NA	NA	NA	NA	0.546133604957134	0.890200077700078	0.779420921544209	0.552682926829268	0.00694444444444444	0.325464198129733	0.329034391534392	0.224297302395774	-0.470674298631586	0.00636529557134259	0.0855849396642187	0.0281767488128123	0.0535176928494244	0.0252949796349302	0.0237878981707975
250	NC_037328.1:119462925:119463003	NC_037328.1	119462925	119463003	chr1	chr1:119462925:119463003	NA	CpG-deserts;inter	79	NA	NA	NA	NA	NA	NA	0.548629148629149	0.742772750125691	0.452916311452117	0.375350140056022	0.930729166666667	0.759215287200362	0.828546691403834	0.97284490614179	0.342916925287419	0.0143243995529808	0.0484123399523434	0.0371401249327426	0.0732843173550945	0.0317653659426101	0.0330895433320892
251	NC_037328.1:121868695:121868747	NC_037328.1	121868695	121868747	chr1	chr1:121868695:121868747	NA	transcripts;introns;repeats;CpG-deserts;genes	53	NA	PLSCR5	NA	NA	NA	NA	0.522727272727273	0.686811811811812	0.790835707502374	0.780284043441938	1	0.961538461538462	0.973274410774411	0.754310344827586	0.227116095414265	0.0356426289889768	0.0268231404501741	0.0691377470862923	0.116859321007069	0.0470718239471298	0.0543373008028735
252	NC_037328.1:121940315:121940415	NC_037328.1	121940315	121940415	chr1	chr1:121940315:121940415	NA	CpG-deserts;inter	101	NA	NA	NA	NA	NA	NA	0.724915824915825	0.789880952380952	0.787860576923077	0.786324786324786	0.02	0.283730158730159	0.34859649122807	0.389656938044035	-0.511749638135594	0.00738686117299494	0.087084420733957	0.0289423422342601	0.0563564541738114	0.0263398170227492	0.0251048966799237
253	NC_037328.1:122351675:122351727	NC_037328.1	122351675	122351727	chr1	chr1:122351675:122351727	2	transcripts;first intron;CpG-shores;genes	53	NA	PLOD2	NA	NA	NA	NA	0.378819444444444	0.496198830409357	0.335233029381966	0.48876698014629	0.836459330143541	0.712890812890813	0.788871689026488	0.682225677329717	0.330357306252126	0.000872824686535121	0.0360642945684031	0.01642825173916	0.0327951774533681	0.0144608827993614	0.0143711266559774
254	NC_037328.1:1239916:1239933	NC_037328.1	1239916	1239933	chr1	chr1:1239916:1239933	NA	repeats;CpG-deserts;inter	18	NA	NA	NA	NA	NA	NA	0.511052631578947	0.727380952380952	0.422671568627451	0.40625	1	0.7821060355898	0.91957531612704	0.785595081247255	0.354980320094186	0.00964650923827839	0.0502392711102397	0.0299859932135664	0.0621455439607511	0.0272891462530149	0.0278287452319302
255	NC_037328.1:124659217:124659247	NC_037328.1	124659217	124659247	chr1	chr1:124659217:124659247	1	CpG-deserts;inter	31	NA	NA	NA	NA	NA	NA	0.324051324051324	0.613135418101667	0.392709994683679	0.526477146042364	0.140820802005013	0.210597572362278	0.00694444444444444	0.0818942961800105	-0.354029191971822	0.00560581946067574	0.0462808744356506	0.0263301299588136	0.0512066702496944	0.0230202826842647	0.0227210819574437
256	NC_037328.1:124682731:124682754	NC_037328.1	124682731	124682754	chr1	chr1:124682731:124682754	NA	repeats;CpG-deserts;inter	24	NA	NA	NA	NA	NA	NA	0.434477124183007	0.468838288003373	0.300549450549451	0.620031036287194	0.72538543328017	0.800046685340803	0.834601339013999	0.647233893557423	0.295842863042342	0.0121916294608076	0.0353658156765062	0.034444304059942	0.0684471183379051	0.0293818213667958	0.0307913785610455
257	NC_037328.1:124744073:124744101	NC_037328.1	124744073	124744101	chr1	chr1:124744073:124744101	NA	repeats;CpG-deserts;inter	29	NA	NA	NA	NA	NA	NA	0.869716905901116	0.94005439005439	0.94021164021164	0.941081691297209	0.659489633173844	0.775271512113617	0.607580362899512	0.520089786756453	-0.282158333130232	0.00932887346594389	0.0281551145338368	0.0319308694000963	0.0613260391633201	0.0252805764074367	0.0274442086300026
258	NC_037328.1:124878025:124878119	NC_037328.1	124878025	124878119	chr1	chr1:124878025:124878119	NA	transcripts;first intron;repeats;CpG-deserts;genes	95	NA	DIPK2A	NA	NA	NA	NA	0.54679802955665	0.683333333333333	0.42281746031746	0.657828282828283	0.900241066364152	0.82624299719888	0.890656565656566	0.882183908045977	0.297136857807462	0.0122248894055882	0.031773439910587	0.0392029229484706	0.0685301760924368	0.0278971623417654	0.0308310769000739
259	NC_037328.1:124927108:124927165	NC_037328.1	124927108	124927165	chr1	chr1:124927108:124927165	NA	CpG-deserts;inter	58	NA	NA	NA	NA	NA	NA	0.562971342383107	0.419053700662896	0.0831608005521049	0.379660391288298	0.85280244173141	0.57224913065077	0.806798245614035	0.745039682539683	0.383010816412373	0.023035344666062	0.0657686733492945	0.0481940620607374	0.092032681768724	0.0446402958675062	0.0420921696880408
260	NC_037328.1:125019332:125019383	NC_037328.1	125019332	125019383	chr1	chr1:125019332:125019383	NA	repeats;CpG-deserts;inter	52	NA	NA	NA	NA	NA	NA	0.924219283541317	0.984044657097289	0.873065759637188	0.947076648841355	0.467616707616708	0.69749889162805	0.418973354231975	0.716009852216749	-0.357076885855917	0.0147340825361369	0.0474632485082821	0.0379197523012684	0.0742685995653119	0.0333934372877704	0.0335530499704066
261	NC_037328.1:125051241:125051317	NC_037328.1	125051241	125051317	chr1	chr1:125051241:125051317	1	transcripts;first intron;CpG-deserts;genes	77	NA	SLC9A9	NA	NA	NA	NA	0.76468253968254	0.841269841269841	0.804322344322344	0.921690921690922	0.0333333333333333	0.433803258145363	0.05	0.347402597402597	-0.616856614521088	0.00612257776533517	0.128582322705578	0.0301454469970641	0.0528515528996202	0.0269855199952708	0.0234655734578329
262	NC_037328.1:125332246:125332271	NC_037328.1	125332246	125332271	chr1	chr1:125332246:125332271	NA	transcripts;introns;CpG-deserts;genes	26	NA	SLC9A9	NA	NA	NA	NA	0.0526315789473684	0.311183363814943	0.64047619047619	0.361184210526316	0.94791617051679	0.667261904761905	0.883219104733348	0.693181818181818	0.456525913607261	0.0232633105587231	0.0926837792814373	0.049349005633551	0.0924082362216963	0.0462870255707097	0.0422745862787872
263	NC_037328.1:125529742:125529792	NC_037328.1	125529742	125529792	chr1	chr1:125529742:125529792	1	transcripts;introns;repeats;CpG-deserts;genes	51	NA	SLC9A9	NA	NA	NA	NA	0.45365363536719	0.488520884520885	0.454033128727526	0.606887621762889	0.823290966383554	0.717892591279688	0.891871461871462	0.728728991596639	0.289672185188213	0.00197921995661547	0.0291534470702986	0.021149221985166	0.0383713415122794	0.016289900139104	0.016873480669639
264	NC_037328.1:125774648:125774720	NC_037328.1	125774648	125774720	chr1	chr1:125774648:125774720	NA	CpG-deserts;inter	73	NA	NA	NA	NA	NA	NA	0.443079023724185	0.333379475821336	0.5	0.708465608465608	0.985846560846561	0.672740835464621	0.994047619047619	0.866759841602609	0.38361768723757	0.0124234348405481	0.0622957816008761	0.0353483264497921	0.0690005719052809	0.0330614267658954	0.0310454870263056
265	NC_037328.1:1257768:1257801	NC_037328.1	1257768	1257801	chr1	chr1:1257768:1257801	NA	CpG-deserts;inter	34	NA	NA	NA	NA	NA	NA	0.720267321331151	0.403850947158524	0.268657582749264	0.592795943346739	0.875642003559624	0.916025641025641	0.890684624017957	0.824988344988345	0.380442204751472	0.0295290284923495	0.0591043500957058	0.0524575633542867	0.104966347627293	0.0497129985490498	0.0484389029492197
266	NC_037328.1:125837098:125837106	NC_037328.1	125837098	125837106	chr1	chr1:125837098:125837106	NA	CpG-deserts;inter	9	NA	NA	NA	NA	NA	NA	0.701538461538462	0.522303921568627	0.521560656783038	0.661823062558357	1	0.833333333333333	0.891045425767648	0.719834087481146	0.259246686033411	0.0144355332892192	0.0288061673269207	0.0448289581818415	0.073526159445108	0.0299196421291444	0.0332006719851551
267	NC_037328.1:125885364:125885387	NC_037328.1	125885364	125885387	chr1	chr1:125885364:125885387	NA	CpG-deserts;inter	24	NA	NA	NA	NA	NA	NA	0.836363636363636	0.43962962962963	0.801535087719298	0.614756097560976	0.156068737464086	0.409188034188034	0.215057680631451	0.0642857142857143	-0.461921071176064	0.00841567626255289	0.0845203652882471	0.0311288986346423	0.0589844813799045	0.028168289539376	0.0263534760097495
268	NC_037328.1:125998127:125998166	NC_037328.1	125998127	125998166	chr1	chr1:125998127:125998166	NA	repeats;CpG-deserts;inter	40	NA	NA	NA	NA	NA	NA	0.648576097105509	0.811237659063746	0.808101135190919	0.573945025164537	0.156521229181328	0.531940760389036	0.128651490353618	0.227777777777778	-0.449242164705738	0.00908850696549048	0.0783910404716068	0.0316891446092192	0.0607251766458374	0.0289246029292689	0.0271690160265586
269	NC_037328.1:126109207:126109247	NC_037328.1	126109207	126109247	chr1	chr1:126109207:126109247	1	CpG-deserts;inter	41	NA	NA	NA	NA	NA	NA	0.485200746965453	0.402116402116402	0.153295668549906	0.461007591442374	0.969157088122605	0.649529569892473	0.914447814852264	0.766416040100251	0.449482525973364	0.00524144674893865	0.0766431607817394	0.0259270121883635	0.0501693718472459	0.023196890933117	0.0222401077056845
270	NC_037328.1:126188073:126188122	NC_037328.1	126188073	126188122	chr1	chr1:126188073:126188122	NA	transcripts;introns;CpG-deserts;genes	50	NA	PCOLCE2	NA	NA	NA	NA	0.540053358472198	0.494786955527331	0.420442345179187	0.261257221219908	0.860013282101748	0.54980278980279	0.798885033095559	0.631019422261658	0.280795161715783	0.0257143389461264	0.0378384300366598	0.0497209561677203	0.0973628979704216	0.0430069137469915	0.0446864746209109
271	NC_037328.1:126233250:126233300	NC_037328.1	126233250	126233300	chr1	chr1:126233250:126233300	NA	repeats;CpG-deserts;inter;downstream	51	NA	NA	NA	NA	NA	PCOLCE2	0.145098039215686	0.118279569892473	0.229363472784525	0.416632996632997	0.962248062015504	0.753105158730159	0.38982683982684	0.658796296296296	0.463650569585779	0.0209365211676404	0.0933732092199172	0.0468679490660202	0.0878007909138768	0.0435970631219373	0.0400280161467253
272	NC_037328.1:126274274:126274285	NC_037328.1	126274274	126274285	chr1	chr1:126274274:126274285	NA	transcripts;introns;repeats;CpG-deserts;genes	12	NA	TRPC1	NA	NA	NA	NA	1	0.636508720747851	0.746818082071538	0.460353897656624	0.139314194577352	0.238611111111111	0.122646280734516	0.345954224453331	-0.499288722399926	0.0144057841697266	0.0976676344404096	0.0389101513837148	0.0734812122711488	0.0355134689991077	0.0331805255256036
273	NC_037328.1:126635751:126635781	NC_037328.1	126635751	126635781	chr1	chr1:126635751:126635781	6	transcripts;introns;CpG-deserts;genes	31	NA	XRN1	NA	NA	NA	NA	0.769001831501832	0.990715620666787	1	0.825508695717755	0.419122257053292	0.56122156179545	0.26195652173913	0.623254281949934	-0.429917881337142	0.0061191007364689	0.0697385308172696	0.0270000648186265	0.0528410080878734	0.0249569631639823	0.0234606076330059
274	NC_037328.1:126718734:126718773	NC_037328.1	126718734	126718773	chr1	chr1:126718734:126718773	NA	CpG-deserts;inter	40	NA	NA	NA	NA	NA	NA	0.673402255639098	0.605439411536972	0.507186653925784	0.657828282828283	0.946611932129173	0.712651980257614	0.904644326866549	0.896804062126643	0.254213924362461	0.00897616477429482	0.0255139949785738	0.03757766243449	0.0604540932487872	0.0248879051964671	0.0270446728336903
275	NC_037328.1:126729167:126729266	NC_037328.1	126729167	126729266	chr1	chr1:126729167:126729266	9	repeats;CpG-deserts;inter	100	NA	NA	NA	NA	NA	NA	0.405674699307238	0.238556972725691	0.327043716517401	0.450606712874754	0.954975752889629	0.684008230452675	0.875326895285255	0.698628434271999	0.447764302868619	0.00216764758836843	0.0686305729967524	0.0200269467827505	0.0391764713839723	0.0180463105153833	0.0172461838282956
276	NC_037328.1:126729661:126729731	NC_037328.1	126729661	126729731	chr1	chr1:126729661:126729731	NA	CpG-deserts;inter	71	NA	NA	NA	NA	NA	NA	0.598214285714286	0.577380952380952	0.204429499072356	0.522148394241417	0.757991681521093	0.654160654160654	0.978472222222222	0.947474747474748	0.358981543492427	0.0251644182036742	0.0615280567864434	0.0499532164450913	0.0963289983468382	0.0452698941571165	0.0441688646286108
277	NC_037328.1:126729905:126729961	NC_037328.1	126729905	126729961	chr1	chr1:126729905:126729961	NA	CpG-deserts;inter	57	NA	NA	NA	NA	NA	NA	0.630555555555556	0.635515873015873	0.481664470794906	0.327830024381749	0.861721611721612	0.611967009025833	0.984819734345351	0.811074740861975	0.298504293051672	0.0312073425552254	0.0449152237314376	0.05760497444152	0.10837422268336	0.0470309982740008	0.0501009936917752
278	NC_037328.1:126730659:126730698	NC_037328.1	126730659	126730698	chr1	chr1:126730659:126730698	0	repeats;CpG-deserts;inter	40	NA	NA	NA	NA	NA	NA	0.689149212316505	0.556135531135531	0.523346914523385	0.651428406948462	0.949090213269318	0.845752831197245	0.760498207885305	0.797416543116635	0.233174432636155	0.00621056433854147	0.0210124034035501	0.0385919481296936	0.0530189070121218	0.0222486014821889	0.0235525146364723
279	NC_037328.1:126980861:126980935	NC_037328.1	126980861	126980935	chr1	chr1:126980861:126980935	NA	transcripts;first intron;CpG-deserts;genes	75	NA	TFDP2	NA	NA	NA	NA	0.651346153846154	0.673988756341698	0.593423551756885	0.620138888888889	1	0.739519620164781	0.983680555555556	0.848888888888889	0.2582979284439	0.0203007416079473	0.0260494410781694	0.0539109118043925	0.0864711184989858	0.03321117979386	0.0393965647501704
280	NC_037328.1:127013513:127013570	NC_037328.1	127013513	127013570	chr1	chr1:127013513:127013570	NA	transcripts;introns;CpG-deserts;genes	58	NA	TFDP2	NA	NA	NA	NA	0.771268111073345	0.875444767576051	0.882743961352657	0.716765188834154	0.298468468468468	0.526394279877426	0.131507936507936	0.0564102564102564	-0.55836027189303	0.00808622818962754	0.110501401285574	0.0303150282776234	0.0581410995859354	0.027776919766219	0.0259475908683116
281	NC_037328.1:127031678:127031756	NC_037328.1	127031678	127031756	chr1	chr1:127031678:127031756	3	CpG-deserts;inter	79	NA	NA	NA	NA	NA	NA	0.568463869214057	0.624473999251777	0.830165726442152	0.611849446778917	0.157256585222687	0.329581629603714	0.0146930846930847	0.0562573099415205	-0.519291108056474	0.00141573251199805	0.0913126249545968	0.0184844303422152	0.0357338012833557	0.0165163363960262	0.0156959597932728
282	NC_037328.1:127034160:127034246	NC_037328.1	127034160	127034246	chr1	chr1:127034160:127034246	NA	CpG-deserts;inter	87	NA	NA	NA	NA	NA	NA	0.666666666666667	0.5	0.166666666666667	0.333333333333333	1	0.8	1	1	0.533333333333333	0.00949928013104807	0.105396825396825	0.0323403146949343	0.0617608174858462	0.0296613944811664	0.0276445352004751
283	NC_037328.1:127034199:127034246	NC_037328.1	127034199	127034246	chr1	chr1:127034199:127034246	6	CpG-deserts;inter	48	NA	NA	NA	NA	NA	NA	0.345014245014245	0.415866741953698	0.321834625322997	0.646604938271605	0.983399358611583	0.684515915119363	0.836925647451963	0.897939883288993	0.418365063477339	0.00541138640918379	0.0662463312457088	0.0254384626920089	0.0506813947691497	0.023455122424812	0.0224722334906703
284	NC_037328.1:127037520:127037541	NC_037328.1	127037520	127037541	chr1	chr1:127037520:127037541	NA	CpG-deserts;inter	22	NA	NA	NA	NA	NA	NA	0.670138888888889	0.642641586140038	0.599669148056245	0.432687012723531	0.92293356096173	0.760367965367965	1	0.803515450067174	0.285420085147041	0.00970600822254583	0.0332911412981719	0.0310946878078181	0.0623038772275282	0.0256754112605182	0.0279057648579792
285	NC_037328.1:127115872:127115950	NC_037328.1	127115872	127115950	chr1	chr1:127115872:127115950	NA	CpG-deserts;inter	79	NA	NA	NA	NA	NA	NA	0.46007326007326	0.411988304093567	0.308507611324513	0.34978354978355	0.848781937017231	0.647369214533394	0.848244348244348	0.527619047619048	0.335415455534783	0.0172258068425927	0.044820079300655	0.041925230241247	0.0800954546078026	0.0344372080267333	0.0363074148416196
286	NC_037328.1:127125317:127125396	NC_037328.1	127125317	127125396	chr1	chr1:127125317:127125396	NA	CpG-deserts;inter	80	NA	NA	NA	NA	NA	NA	0.405182072829132	0.560714285714286	0.262368972746331	0.335470085470085	0.876495726495727	0.815911519036519	0.991666666666667	0.577872744539411	0.424552809994623	0.00917267836910736	0.0714779708946174	0.0319455309216625	0.0609346673394326	0.0284064320144581	0.0272652650938424
287	NC_037328.1:127134980:127135058	NC_037328.1	127134980	127135058	chr1	chr1:127134980:127135058	NA	CpG-deserts;inter	79	NA	NA	NA	NA	NA	NA	0.387404041978987	0.458866168716069	0.314384087243	0.606043296482135	0.880361071273477	0.800341398590603	0.954359581342377	0.625566557343141	0.373482753532352	0.00761139187372102	0.0550332126358473	0.0281348394569397	0.0568883416349994	0.0249704047960017	0.0253529951988722
288	NC_037328.1:127159776:127159841	NC_037328.1	127159776	127159841	chr1	chr1:127159776:127159841	NA	transcripts;introns;repeats;CpG-deserts;genes	66	NA	GRK7	NA	NA	NA	NA	0.508777777777778	0.298102543081022	0.487548358074674	0.508030228648785	0.834697185325743	0.525253126861227	0.913358182697805	0.731201285771178	0.300512718268423	0.0285897213195827	0.0423769000719949	0.0513799540104076	0.103161553823751	0.0456172665332833	0.0475345342913231
289	NC_037328.1:127170179:127170226	NC_037328.1	127170179	127170226	chr1	chr1:127170179:127170226	NA	transcripts;introns;CpG-shores;genes	48	NA	GRK7	NA	NA	NA	NA	0.591666666666667	0.594948018193632	0.732269503546099	0.870488931358496	1	0.838056806806807	0.996598639455782	0.896549718937779	0.235458011358869	0.0293216750257256	0.0260870008672807	0.0613816161507441	0.104594984650444	0.0423106398191345	0.0482506218406581
290	NC_037328.1:127282619:127282646	NC_037328.1	127282619	127282646	chr1	chr1:127282619:127282646	NA	CpG-deserts;inter	28	NA	NA	NA	NA	NA	NA	0.704688393367639	0.416757377842284	0.316697191697192	0.40496707299986	0.953335870116692	0.79459155360381	0.777944862155388	0.868131868131868	0.387723529525196	0.0122940441116106	0.0578890603899972	0.0339975208330759	0.0687015160042253	0.0309551563493229	0.030913117012412
291	NC_037328.1:127546607:127546637	NC_037328.1	127546607	127546637	chr1	chr1:127546607:127546637	NA	CpG-deserts;inter	31	NA	NA	NA	NA	NA	NA	0.70184748427673	0.831337156995052	0.495673076923077	0.557647196809758	0.967300274691092	0.797202797202797	0.937030684200496	0.937576312576313	0.26315128841652	0.0307319876722654	0.0319808972549871	0.0649839831287103	0.107420772768745	0.0429552852952831	0.0496341041029888
292	NC_037328.1:127568714:127568778	NC_037328.1	127568714	127568778	chr1	chr1:127568714:127568778	NA	repeats;CpG-deserts;inter	65	NA	NA	NA	NA	NA	NA	0.315972222222222	0.49031955653379	0.292181947405828	0.591224747474748	0.843705579246624	0.633922558922559	0.880983709273183	0.73373440285205	0.350661944164457	0.00930714582749609	0.0492671603626624	0.0307988163953783	0.061270878689979	0.0268768900077721	0.0274198489411362
293	NC_037328.1:127568714:127568832	NC_037328.1	127568714	127568832	chr1	chr1:127568714:127568832	NA	repeats;CpG-deserts;inter	119	NA	NA	NA	NA	NA	NA	0.5	0.666666666666667	0.166666666666667	0.5	1	0.818181818181818	1	1	0.496212121212121	0.0116566726462951	0.092741538764266	0.036296446199331	0.0671872125219402	0.032119749385414	0.0302015741773555
294	NC_037328.1:127574663:127574717	NC_037328.1	127574663	127574717	chr1	chr1:127574663:127574717	NA	CpG-shores;inter	55	NA	NA	NA	NA	NA	NA	0.727513227513227	0.84459706959707	0.791126410403519	0.549881796690307	1	0.91136869219061	1	0.962130541871921	0.240095182464602	0.0276420386800248	0.0242694608266454	0.0694629851399978	0.101246720321471	0.0379563933579352	0.0465929645703956
295	NC_037328.1:127576926:127576960	NC_037328.1	127576926	127576960	chr1	chr1:127576926:127576960	6	CpG-shores;inter	35	NA	NA	NA	NA	NA	NA	0.267086834733894	0.458310104529617	0.236708321305916	0.385725518815444	0.641285714285714	0.508255038792114	0.703841463414634	0.803571428571429	0.327280716419755	0.00707549925028805	0.0417288066995849	0.0275108215614594	0.0555251766815536	0.0236898936498177	0.0247101220302712
296	NC_037328.1:127583386:127583437	NC_037328.1	127583386	127583437	chr1	chr1:127583386:127583437	6	CpG-deserts;inter	52	NA	NA	NA	NA	NA	NA	0.624725028058361	0.417620650953984	0.385857174012173	0.544214956454046	0.947749125324071	0.797807506503159	0.83701226309922	0.704388714733542	0.328634950045357	0.00478278609012162	0.0405133619183728	0.0248581115894887	0.0488451424801064	0.0209760852970664	0.0216280940102163
297	NC_037328.1:127583776:127583789	NC_037328.1	127583776	127583789	chr1	chr1:127583776:127583789	NA	CpG-deserts;inter	14	NA	NA	NA	NA	NA	NA	0.496031746031746	0.637160633484163	0.333333333333333	0.297030056400371	0.826628821911841	0.560858360590742	0.852830746489283	0.715598290598291	0.298090112585136	0.0281712096939517	0.0434943793276737	0.0543533198747339	0.102342149329941	0.0439652879552978	0.0471244246294606
298	NC_037328.1:127585428:127585520	NC_037328.1	127585428	127585520	chr1	chr1:127585428:127585520	0	CpG-deserts;inter	93	NA	NA	NA	NA	NA	NA	0.619189342403628	0.556082056082056	0.62125723738627	0.710216572504708	0.933660130718954	0.800347222222222	0.812294397800363	0.952614379084967	0.248042730362461	0.0031681117453134	0.0220097251156513	0.0251686475857018	0.0433156779405145	0.0176423003461547	0.019108444611685
299	NC_037328.1:127592947:127593038	NC_037328.1	127592947	127593038	chr1	chr1:127592947:127593038	NA	CpG-deserts;inter	92	NA	NA	NA	NA	NA	NA	0.680059523809524	0.303075396825397	0.346562317919381	0.306481481481481	0.96957671957672	0.673028360528361	0.900537634408602	0.752917833800187	0.414970457069522	0.0121232607507847	0.0711997786296585	0.0354992918556751	0.0682848264239034	0.0326789870299543	0.0307143207936242
300	NC_037328.1:127608791:127608839	NC_037328.1	127608791	127608839	chr1	chr1:127608791:127608839	5	CpG-deserts;inter	49	NA	NA	NA	NA	NA	NA	0.174974466394745	0.537276422764228	0.178494984449567	0.447050511025666	0.889597074527752	0.844215462619838	0.944613758334689	0.797415500350921	0.534511352799748	0.00698810371550271	0.0981224150919392	0.0288083475281676	0.0553308600819164	0.0258372828835443	0.0246220760622955
301	NC_037328.1:127609024:127609095	NC_037328.1	127609024	127609095	chr1	chr1:127609024:127609095	NA	CpG-deserts;inter	72	NA	NA	NA	NA	NA	NA	0.258944203944204	0.296603686397088	0.194897383939937	0.436602120322845	0.948170626275201	0.61190408357075	0.498666109718741	0.904387287978619	0.444020178234809	0.0194536945278733	0.0815251516586641	0.0443717423585768	0.084719202195202	0.0407596199842006	0.0385387871567988
302	NC_037328.1:127660078:127660136	NC_037328.1	127660078	127660136	chr1	chr1:127660078:127660136	4	repeats;CpG-deserts;inter	59	NA	NA	NA	NA	NA	NA	0.480466200466201	0.549538784067086	0.610304058497067	0.593782467532468	0.0939000193573364	0.0807224745836037	0.133475935828877	0.316941345503719	-0.402262933822321	0.00181405340316063	0.0528087596169392	0.0185293634363794	0.0375982672287471	0.0168378381531258	0.0165161869604443
303	NC_037328.1:127660438:127660503	NC_037328.1	127660438	127660503	chr1	chr1:127660438:127660503	0	CpG-deserts;inter	66	NA	NA	NA	NA	NA	NA	0.674476513865308	0.657972350230415	0.477616769195717	0.53610907165124	0.165425685425685	0.288723278785198	0.0290807122127226	0.255670215670216	-0.401818703212215	0.00196172748218294	0.0558008534002913	0.0190540701480066	0.038255670815353	0.0172309704358073	0.01682189738242
304	NC_037328.1:127663141:127663206	NC_037328.1	127663141	127663206	chr1	chr1:127663141:127663206	2	CpG-deserts;inter	66	NA	NA	NA	NA	NA	NA	0.720711759504863	0.953439153439153	0.808806146572104	0.715369059656218	0.23731884057971	0.394531569059871	0.0892156862745098	0.318765432098765	-0.539623647789871	0.000828900019144958	0.0958129477148279	0.0166407616266972	0.0326331205102571	0.0150917366759845	0.014299033234674
305	NC_037328.1:127671945:127672030	NC_037328.1	127671945	127672030	chr1	chr1:127671945:127672030	3	CpG-deserts;inter	86	NA	NA	NA	NA	NA	NA	0.453856209150327	0.532051282051282	0.678472222222222	0.543040293040293	0.199206349206349	0.383333333333333	0.213075880758808	0.138827838827839	-0.318244151084449	0.00409263065854685	0.0373814636475042	0.0233696625741389	0.0466500665935275	0.0205513320957193	0.0206137529599077
306	NC_037328.1:127672532:127672559	NC_037328.1	127672532	127672559	chr1	chr1:127672532:127672559	0	CpG-deserts;inter	28	NA	NA	NA	NA	NA	NA	0.711101766190076	0.508333333333333	0.644551282051282	0.905150561476289	0.0106993006993007	0.225322381204734	0.00175438596491228	0.0338068181818182	-0.624388514250054	0.00130394731861574	0.127870841176795	0.0198317942313365	0.0350810062727826	0.017218314801695	0.0154075739435997
307	NC_037328.1:127705329:127705355	NC_037328.1	127705329	127705355	chr1	chr1:127705329:127705355	NA	repeats;CpG-deserts;inter	27	NA	NA	NA	NA	NA	NA	0.996376811594203	1	1	0.822735112563544	0.435951405044127	0.652116402116402	0.298115079365079	0.660934744268078	-0.442998573341015	0.00867956784390812	0.0727279190570161	0.0312388836632146	0.0597084948895374	0.0278019658672796	0.0267010668047155
308	NC_037328.1:127709331:127709402	NC_037328.1	127709331	127709402	chr1	chr1:127709331:127709402	NA	CpG-deserts;inter	72	NA	NA	NA	NA	NA	NA	0.643597197376267	0.295759795759796	0.637229437229437	0.574275362318841	0.855444997236042	0.830901856763926	0.98155929038282	0.87096118675066	0.347001384612277	0.0176625502070456	0.0478762338752792	0.0413736680595036	0.0810440398763724	0.0357705897519848	0.036761300515644
309	NC_037328.1:127727906:127727950	NC_037328.1	127727906	127727950	chr1	chr1:127727906:127727950	3	CpG-deserts;inter	45	NA	NA	NA	NA	NA	NA	0.29025641025641	0.540262923351159	0.503379921049824	0.587652173913044	0.948793650793651	0.843314641744548	0.821688535063148	0.99450146627566	0.421686716326642	0.00276468896501884	0.061149811457566	0.0210728647982795	0.0415949383968035	0.0192519338184042	0.0183346909197383
310	NC_037328.1:127728122:127728179	NC_037328.1	127728122	127728179	chr1	chr1:127728122:127728179	NA	CpG-deserts;inter	58	NA	NA	NA	NA	NA	NA	0.533653846153846	0.26984126984127	0.353084415584416	0.615721288515406	0.893816210889382	0.617766203703704	0.986402486402486	0.726587301587302	0.363067845621984	0.0195284088438916	0.0602501458263432	0.0423038473762939	0.0848783839325408	0.0414055254492414	0.0386147047162747
311	NC_037328.1:127729088:127729125	NC_037328.1	127729088	127729125	chr1	chr1:127729088:127729125	NA	repeats;CpG-deserts;inter	38	NA	NA	NA	NA	NA	NA	0.703546179871737	0.791867194108573	0.905343221626	0.807302043422733	0.362407662968465	0.478743511337019	0.0775998398046605	0.00899080899080899	-0.570079203982022	0.0100975275731411	0.117420767052344	0.0337441313746474	0.0632792294187323	0.0304634674179426	0.0283774359065624
312	NC_037328.1:127751533:127751604	NC_037328.1	127751533	127751604	chr1	chr1:127751533:127751604	NA	repeats;CpG-deserts;inter	72	NA	NA	NA	NA	NA	NA	0.497164869029276	0.37525806040525	0.446586378737542	0.365384615384615	0.189643463497453	0.287387783840873	0.0505769230769231	0.0355742296918767	-0.280302880862389	0.0110842916080838	0.0302666922724706	0.0375555680272414	0.0658366340745215	0.0269855199952708	0.0295647618799036
313	NC_037328.1:127832541:127832599	NC_037328.1	127832541	127832599	chr1	chr1:127832541:127832599	5	transcripts;exons;3UTR;CpG-deserts;genes	59	NA	SPSB4	NA	NA	SPSB4	NA	0.699889732908601	0.556806418219462	0.462127976190476	0.530808080808081	0.921134421134421	0.776444119727702	0.89957264957265	0.819871794871795	0.291847694294987	0.00411238575841863	0.0305858114594621	0.0254617525928055	0.0467035490204979	0.0194515221686488	0.0206411118304082
314	NC_037328.1:127851663:127851697	NC_037328.1	127851663	127851697	chr1	chr1:127851663:127851697	NA	transcripts;first intron;CpG-deserts;genes	35	NA	SPSB4	NA	NA	NA	NA	0.686706349206349	0.475829725829726	0.408110735114119	0.447777777777778	0.855840879079419	0.64225345310538	0.896284829721362	0.702634245187437	0.269647204791406	0.0210618824744641	0.0337214428749566	0.0445483516604287	0.0880776993702043	0.0357066128203816	0.0401684522156383
315	NC_037328.1:128043144:128043204	NC_037328.1	128043144	128043204	chr1	chr1:128043144:128043204	NA	promoters;CpG-shores;repeats;inter	61	SLC25A36	NA	NA	NA	NA	NA	0.46398249738767	0.579818594104308	0.190799187892211	0.524607113316791	0.936282467532468	0.710499316005472	0.854293854293854	0.875480769230769	0.404337253590396	0.0107491304116703	0.0633994701934242	0.0332334326715351	0.0649985501451008	0.030696875193431	0.0291719676565427
316	NC_037328.1:128113781:128113802	NC_037328.1	128113781	128113802	chr1	chr1:128113781:128113802	NA	repeats;CpG-deserts;inter	22	NA	NA	NA	NA	NA	NA	0.69916085440279	0.756349206349206	0.388238238238238	0.520486555697823	1	0.886028054632706	1	0.759982535524331	0.320443933867245	0.0236173142085424	0.047109012293555	0.0474721621804511	0.0931541932530997	0.0425595723516928	0.0426371703554556
317	NC_037328.1:128491842:128491879	NC_037328.1	128491842	128491879	chr1	chr1:128491842:128491879	NA	transcripts;CDS;exons;introns;CpG-deserts;genes	38	NA	CLSTN2	NA	NA	NA	NA	0.645608292416803	0.484074941451991	0.510103687993402	0.671564293268147	0.809225123741253	0.857681534152122	0.758364121510673	0.813414634146341	0.231833549605011	0.0102966268272768	0.0198860127102494	0.0505349505030842	0.063845494212294	0.0264085701196183	0.0286424743167438
318	NC_037328.1:128499531:128499569	NC_037328.1	128499531	128499569	chr1	chr1:128499531:128499569	2	transcripts;introns;CpG-deserts;genes	39	NA	CLSTN2	NA	NA	NA	NA	0.1657824933687	0.363793734811412	0.357413140694874	0.459490740740741	0.843226022803488	0.672222222222222	0.712342615568422	0.684723401245048	0.391508538055863	0.00286351599901484	0.0529310654718106	0.020928565098379	0.042099062145838	0.0188261299214012	0.0185558107480285
319	NC_037328.1:128640886:128640959	NC_037328.1	128640886	128640959	chr1	chr1:128640886:128640959	NA	transcripts;introns;repeats;CpG-deserts;genes	74	NA	CLSTN2	NA	NA	NA	NA	0.391461705110233	0.33871635610766	0.493203463203463	0.136470763854131	0.822972425891773	0.63445666842692	0.783819026501953	0.615636388267967	0.374258055203282	0.00814594022863203	0.0543479452057998	0.0288129742333444	0.0582975772358176	0.0260190452111711	0.0260251710330819
320	NC_037328.1:129004702:129004728	NC_037328.1	129004702	129004728	chr1	chr1:129004702:129004728	5	transcripts;first intron;CpG-deserts;genes	27	NA	CLSTN2	NA	NA	NA	NA	0.508709677419355	0.464102965747703	0.594281781781782	0.420307304208233	0.871264121264121	0.776369863013699	0.921861471861472	0.854938271604938	0.359257999646789	0.000350877085741047	0.0408014490040231	0.0145024126490123	0.0282455218886904	0.0128093638120577	0.0123855499004737
321	NC_037328.1:129039498:129039552	NC_037328.1	129039498	129039552	chr1	chr1:129039498:129039552	1	transcripts;first intron;repeats;CpG-deserts;genes	55	NA	CLSTN2	NA	NA	NA	NA	0.594102564102564	0.451618871415356	0.821111111111111	0.614804376657825	0.0648148148148148	0.252587991718426	0.0536062378167641	0.272321428571429	-0.459576612591356	0.00362083120739427	0.0762117042272481	0.0228142533620214	0.045002010764854	0.0207181728164324	0.0198747675921672
322	NC_037328.1:129533906:129533992	NC_037328.1	129533906	129533992	chr1	chr1:129533906:129533992	NA	CpG-deserts;inter	87	NA	NA	NA	NA	NA	NA	0.490386367778385	0.73736972266384	0.427126436781609	0.570361635220126	0.829197045621868	0.799087893864013	0.907334211682038	0.724200206398349	0.258643798780577	0.0219177264139439	0.0292903673483881	0.0517275158708325	0.0897857715739799	0.0361202427398122	0.0409917182935195
323	NC_037328.1:129739084:129739164	NC_037328.1	129739084	129739164	chr1	chr1:129739084:129739164	NA	transcripts;CDS;exons;introns;CpG-deserts;genes;downstream	81	NA	COPB2	NA	NA	NA	MRPS22	0.509969028261711	0.526573426573427	0.505464975845411	0.610352923912246	0.950892857142857	0.702750949586393	0.978318350079323	0.721913580246913	0.300378845615673	0.0207905654802737	0.0359808805899378	0.0436102866549706	0.0874699902280743	0.0369262069092578	0.0398735267246113
324	NC_037328.1:129739977:129740013	NC_037328.1	129739977	129740013	chr1	chr1:129739977:129740013	NA	transcripts;introns;CpG-deserts;genes;downstream	37	NA	COPB2	NA	NA	NA	MRPS22	0.712228641456583	0.633222986164163	0.466924450939796	0.462873931623932	0.87552790346908	0.844876949317739	0.836782572266443	0.746764883861658	0.257175574682612	0.0181864628527194	0.0268290609941202	0.0506270251851062	0.0821158840318968	0.0332836587456473	0.0372799977204463
325	NC_037328.1:129795761:129795831	NC_037328.1	129795761	129795831	chr1	chr1:129795761:129795831	NA	CpG-deserts;inter	71	NA	NA	NA	NA	NA	NA	0.685645272601794	0.612593324549846	0.41469387755102	0.691436251920123	0.909340659340659	0.817555081734186	0.863581367211131	0.665079365079365	0.212796936685639	0.0452906910065714	0.0249272930053439	0.0856098465964037	0.134468624613753	0.0497209494667086	0.0632956030003643
326	NC_037328.1:129813608:129813697	NC_037328.1	129813608	129813697	chr1	chr1:129813608:129813697	3	CpG-deserts;inter	90	NA	NA	NA	NA	NA	NA	0.282212885154062	0.378947368421053	0.0798449612403101	0.219135802469136	0.782700687112452	0.58054834054834	0.602469135802469	0.905701754385965	0.477819725141166	0.00335244869125248	0.0822078581708845	0.0229667621378386	0.0440735522698653	0.0206703711337368	0.0194587632475083
327	NC_037328.1:130234944:130235032	NC_037328.1	130234944	130235032	chr1	chr1:130234944:130235032	3	repeats;CpG-deserts;inter	89	NA	NA	NA	NA	NA	NA	0.584248366013072	0.812299741602067	0.802387634477187	0.645593869731801	0.363408521303258	0.310727969348659	0.00333333333333333	0.0325126262626263	-0.533636790394063	0.00455379291734631	0.101737241476422	0.0248025081735545	0.0479778955127227	0.0228791249335606	0.0212272567510706
328	NC_037328.1:130235120:130235226	NC_037328.1	130235120	130235226	chr1	chr1:130235120:130235226	NA	repeats;CpG-deserts;inter	107	NA	NA	NA	NA	NA	NA	0.792780748663102	0.767829457364341	0.681749622926093	0.785575048732943	0.0116279069767442	0.409090909090909	0.488188188188188	0.0827664399092971	-0.509065358380335	0.0203172029421087	0.098998040677821	0.0460792796593184	0.0865150872934073	0.0423298036507205	0.0394176979139402
329	NC_037328.1:130469299:130469388	NC_037328.1	130469299	130469388	chr1	chr1:130469299:130469388	NA	transcripts;CDS;exons;introns;CpG-deserts;genes	90	NA	PIK3CB	NA	NA	NA	NA	0.349755201958384	0.650724637681159	0.286719655572115	0.250190694126621	0.816335978835979	0.82920862490755	0.82982944011865	0.939707149009474	0.469422750883344	0.0104568298926546	0.0786230000429208	0.0328016376292646	0.0642371845423495	0.0306981791028325	0.0288213750580464
330	NC_037328.1:130669291:130669344	NC_037328.1	130669291	130669344	chr1	chr1:130669291:130669344	NA	repeats;CpG-deserts;inter	54	NA	NA	NA	NA	NA	NA	0.323484848484848	0.400344357735662	0.160264944747703	0.363405676865556	0.88791846128555	0.438380635757685	0.725208821233411	0.757566643882433	0.390393683581328	0.0172835236301715	0.0637291353981383	0.0411906804942322	0.0802125778262117	0.0365726386868496	0.0363637277303803
331	NC_037328.1:130669579:130669643	NC_037328.1	130669579	130669643	chr1	chr1:130669579:130669643	NA	repeats;CpG-deserts;inter	65	NA	NA	NA	NA	NA	NA	0.308134920634921	0.330357142857143	0.0393518518518519	0.345403439153439	0.884489693313223	0.467619456981159	0.709791445740544	0.489087301587302	0.381935135781218	0.0231759692650458	0.0674343756618426	0.0482095479197324	0.0922655513870081	0.0447955886610877	0.0422056077762152
332	NC_037328.1:130728016:130728059	NC_037328.1	130728016	130728059	chr1	chr1:130728016:130728059	3	transcripts;introns;CpG-deserts;genes	44	NA	MRAS	NA	NA	NA	NA	0.70137464874307	0.806547619047619	0.706961064633414	0.611616161616162	0.172839506172839	0.398744473916888	0.0256786500366838	0.196814373897707	-0.508105622504037	0.00285526792378311	0.0865725578100437	0.0214445478373554	0.042039286568849	0.019715658207334	0.0185288569784708
333	NC_037328.1:130777416:130777501	NC_037328.1	130777416	130777501	chr1	chr1:130777416:130777501	6	CpG-shelves;inter	86	NA	NA	NA	NA	NA	NA	0.343434343434343	0.658730158730159	0.395833333333333	0.270588235294118	0.8	1	0.763157894736842	0.881578947368421	0.444037692828328	0.00657834271176367	0.0733010146322321	0.0279150002154137	0.0541413797177316	0.0250237037039285	0.0240717580301048
334	NC_037328.1:130833703:130833807	NC_037328.1	130833703	130833807	chr1	chr1:130833703:130833807	NA	transcripts;introns;repeats;CpG-deserts;genes	105	NA	ARMC8	NA	NA	NA	NA	0.646745710429921	0.762468967670928	0.368957062438258	0.545248238351687	0.996773134468364	0.748393215645552	0.979374470083131	0.973274314489213	0.343598788948866	0.0177951371019823	0.0516058842949913	0.0406659542429415	0.0813287055220804	0.0358946887453632	0.0368990349932764
335	NC_037328.1:131053317:131053394	NC_037328.1	131053317	131053394	chr1	chr1:131053317:131053394	NA	repeats;CpG-deserts;inter	78	NA	NA	NA	NA	NA	NA	0.562227358081757	0.430549293049293	0.444962406015038	0.71806278280543	0.979283679283679	0.631972682489924	0.900793650793651	0.960982495765104	0.32930766709521	0.0207215484419912	0.0497012197267477	0.0443750157901266	0.0873040824168711	0.037914107896753	0.0397971907372688
336	NC_037328.1:131060687:131060732	NC_037328.1	131060687	131060732	chr1	chr1:131060687:131060732	3	CpG-deserts;inter	46	NA	NA	NA	NA	NA	NA	0.505042735042735	0.40467366615677	0.383383875289246	0.299910092000487	0.954243550695094	0.644675641057322	0.860398844222374	0.845948558191549	0.428064056419275	0.00245697025011375	0.062674445645266	0.020473469064249	0.0402799289036286	0.0185989607201185	0.0177535996050712
337	NC_037328.1:131142298:131142355	NC_037328.1	131142298	131142355	chr1	chr1:131142298:131142355	NA	repeats;CpG-deserts;inter	58	NA	NA	NA	NA	NA	NA	0.563354634783206	0.501220043572985	0.271464646464646	0.463733978439861	0.804487179487179	0.900817398919866	0.979577175697865	0.589249492900608	0.368589485936205	0.0145574065607926	0.0578181180981648	0.0368176843337539	0.0738204364499054	0.0341127295061718	0.0333447502502056
338	NC_037328.1:131293746:131293767	NC_037328.1	131293746	131293767	chr1	chr1:131293746:131293767	NA	CpG-deserts;inter	22	NA	NA	NA	NA	NA	NA	0.822179322179322	0.522474747474747	0.639814814814815	0.647837697500185	0.869281045751634	0.804329004329004	1	0.885532591414944	0.231709014881628	0.0245776934815031	0.0247175139214694	0.0558567065907401	0.0951091171505974	0.0357892702032275	0.0435837619415947
339	NC_037328.1:131457145:131457222	NC_037328.1	131457145	131457222	chr1	chr1:131457145:131457222	NA	CpG-deserts;inter	78	NA	NA	NA	NA	NA	NA	0.401937984496124	0.656666666666667	0.418104575163399	0.652894491129785	0.970833333333333	0.743509440813362	0.91060405643739	0.831583846944016	0.331731740018032	0.0105417565967838	0.0441844019638912	0.0335170690933853	0.0644738095131731	0.0282370013790708	0.0289317677392527
340	NC_037328.1:131898935:131898994	NC_037328.1	131898935	131898994	chr1	chr1:131898935:131898994	8	repeats;CpG-deserts;inter	60	NA	NA	NA	NA	NA	NA	0.605820105820106	0.238214777941777	0.444766810698333	0.564822618450043	0.983967351786352	0.835398739746566	1	0.907721454139731	0.468365808190597	0.00581058926472486	0.0768006176069175	0.0266500852257599	0.0518409569263593	0.024504492473728	0.023007808659606
341	NC_037328.1:132118102:132118180	NC_037328.1	132118102	132118180	chr1	chr1:132118102:132118180	NA	repeats;CpG-deserts;inter	79	NA	NA	NA	NA	NA	NA	0.725164690382082	0.671560807690693	0.534541062801932	0.90625	0.271167557932264	0.491716968477532	0.263616557734205	0.0416666666666667	-0.44233720251601	0.0107624868390389	0.080518848041829	0.0332266639980478	0.0650237772858765	0.030705601713512	0.0291867222223947
342	NC_037328.1:132122656:132122746	NC_037328.1	132122656	132122746	chr1	chr1:132122656:132122746	NA	CpG-deserts;inter	91	NA	NA	NA	NA	NA	NA	0.786463391259903	0.832855552030692	0.737963028763302	0.8135522388883	0.253798076290478	0.64007272812009	0.264147827845307	0.250636781470854	-0.440544699303867	0.0171028915028456	0.0719804989641514	0.0419081126111157	0.0797834318465331	0.0376828160839119	0.036161145382237
343	NC_037328.1:132124716:132124732	NC_037328.1	132124716	132124732	chr1	chr1:132124716:132124732	NA	repeats;CpG-deserts;inter	17	NA	NA	NA	NA	NA	NA	0.648484848484848	0.619785475165676	0.638305322128851	0.74281825904544	0.924694100226015	0.753360674413306	0.932639149468418	0.949081035923141	0.227595263801516	0.00833576007854261	0.0196913022498273	0.0448248948919979	0.0587877743729599	0.0244935315512945	0.0262629149279528
344	NC_037328.1:132145098:132145160	NC_037328.1	132145098	132145160	chr1	chr1:132145098:132145160	4	CpG-deserts;inter	63	NA	NA	NA	NA	NA	NA	0.504338715641563	0.324037902242237	0.492769607843137	0.580599700149925	1	0.746915673487154	0.930612612612613	0.742029105146469	0.379452866342344	0.00458332266537637	0.0534674896069062	0.0234105320848971	0.0480778574412412	0.0216291334102324	0.0212741125796439
345	NC_037328.1:132176837:132176870	NC_037328.1	132176837	132176870	chr1	chr1:132176837:132176870	NA	transcripts;CDS;exons;CpG-deserts;genes	34	NA	IL20RB	NA	NA	NA	NA	0.58359440267335	0.540978016688062	0.55598448363098	0.455505820807545	1	0.641880341880342	0.737206157686707	0.899116161616162	0.285534984345818	0.0317205280852424	0.0356361995891485	0.0550440135537089	0.109382871178614	0.048477162150518	0.0505936222981037
346	NC_037328.1:132176994:132177095	NC_037328.1	132176994	132177095	chr1	chr1:132176994:132177095	NA	transcripts;introns;CpG-deserts;genes	102	NA	IL20RB	NA	NA	NA	NA	0.5	0.4	0.285714285714286	0.428571428571429	1	0.6	1	0.875	0.465178571428571	0.00957874019994678	0.0804753553206997	0.0316453146476779	0.0619843311882928	0.0297518163559722	0.0277490833704425
347	NC_037328.1:132177056:132177149	NC_037328.1	132177056	132177149	chr1	chr1:132177056:132177149	NA	transcripts;introns;CpG-deserts;genes	94	NA	IL20RB	NA	NA	NA	NA	0.411954887218045	0.43268115942029	0.198495247958164	0.662508383635144	0.894267676767677	0.611442933175636	0.895586170093248	0.914334768053563	0.40249796746462	0.0166419829476838	0.0707502485726884	0.0411419372966161	0.0785903950672916	0.0371697451081537	0.0355947436633515
348	NC_037328.1:132177321:132177413	NC_037328.1	132177321	132177413	chr1	chr1:132177321:132177413	5	transcripts;introns;CpG-deserts;genes	93	NA	IL20RB	NA	NA	NA	NA	0.460593220338983	0.291903265626753	0.464381077634306	0.311248226950355	0.850584858742209	0.782636442072696	0.876921328273908	0.842301587301587	0.456079606460001	0.000789861259348418	0.0638372583433194	0.0163411701063348	0.0323441529889187	0.0146372408505408	0.0141759505280478
349	NC_037328.1:132177746:132177813	NC_037328.1	132177746	132177813	chr1	chr1:132177746:132177813	0	transcripts;introns;repeats;CpG-deserts;genes	68	NA	IL20RB	NA	NA	NA	NA	0.188169642857143	0.243384563982626	0.190064102564103	0.295240734874881	0.669775339602926	0.572559793148028	0.933208317387422	0.87359693877551	0.533070336158783	0.00562488458683466	0.0946092106327638	0.0272200691951187	0.0512645110600644	0.0241560321756812	0.0227481386381665
350	NC_037328.1:132188264:132188297	NC_037328.1	132188264	132188297	chr1	chr1:132188264:132188297	NA	transcripts;introns;repeats;CpG-deserts;genes	34	NA	IL20RB	NA	NA	NA	NA	0.500833333333333	0.378246753246753	0.131490581490581	0.283574879227053	0.879751461988304	0.504750286000286	0.983303518187239	0.704133118625872	0.444448209375995	0.0164317227212424	0.0857425357449844	0.0431512043296304	0.0781196947080031	0.0379299816713212	0.0353736872142236
351	NC_037328.1:132207179:132207257	NC_037328.1	132207179	132207257	chr1	chr1:132207179:132207257	NA	transcripts;first exon;5UTR;CpG-deserts;genes	79	NA	IL20RB	NA	IL20RB	NA	NA	0.441304347826087	0.458090957165521	0.235864197530864	0.177473826409997	0.0357142857142857	0.190519480519481	0.0299966295921807	0.0308326229042342	-0.256417577550572	0.0278164389602775	0.0301758311455301	0.0610568345074264	0.101586430009129	0.0407596199842006	0.0467531252371764
352	NC_037328.1:132207250:132207289	NC_037328.1	132207250	132207289	chr1	chr1:132207250:132207289	NA	transcripts;promoters;first exon;5UTR;CpG-deserts;inter;genes;TSS	40	IL20RB	IL20RB	IL20RB	IL20RB	NA	NA	0.5	0.166666666666667	0.25	0.5	0	0	0	0	-0.354166666666667	0.0258645840787188	0.0484871031746032	0.0503604569877328	0.0976810049654499	0.0444755854801216	0.0448405134356946
353	NC_037328.1:132238790:132238836	NC_037328.1	132238790	132238836	chr1	chr1:132238790:132238836	NA	transcripts;first intron;repeats;CpG-deserts;genes	47	NA	NCK1	NA	NA	NA	NA	0.627083333333333	0.696969696969697	0.602201257861635	0.542435082140964	0.169260516883607	0.289294039294039	0.215099427030671	0.471752331381479	-0.330820763928958	0.00922866725624483	0.040618525102567	0.0312010016997459	0.0610855962584058	0.0267804984048937	0.0273300274444143
354	NC_037328.1:132246776:132246888	NC_037328.1	132246776	132246888	chr1	chr1:132246776:132246888	NA	transcripts;first intron;repeats;CpG-deserts;genes	113	NA	NCK1	NA	NA	NA	NA	0.556810994192398	0.813968253968254	0.635809697627386	0.842491246970105	0.991795665634675	0.816918807008084	0.975139146567718	0.937734693877551	0.218127030082471	0.0428663400856768	0.0244536269586803	0.0789525634171649	0.130182092145355	0.0482280291535976	0.0610633870348487
355	NC_037328.1:132318578:132318625	NC_037328.1	132318578	132318625	chr1	chr1:132318578:132318625	NA	transcripts;first intron;repeats;CpG-deserts;genes	48	NA	SLC35G2	NA	NA	NA	NA	0.756375240082876	0.886053952615529	0.888625437337965	0.644200079436169	0.318961650302055	0.602550975594454	0.165386212624585	0.198719234613096	-0.472409159084587	0.00995944417696419	0.0865809884636081	0.0325311417831996	0.0629381931714851	0.0300735313310909	0.0282101412672702
356	NC_037328.1:132350345:132350418	NC_037328.1	132350345	132350418	chr1	chr1:132350345:132350418	NA	repeats;CpG-deserts;inter	74	NA	NA	NA	NA	NA	NA	0.657343862823046	0.404452566343556	0.247320166404136	0.429249762583096	0.926061980347695	0.736546840958606	0.674025360052642	0.82265664160401	0.35523111620228	0.0159916911706771	0.0534129855962287	0.0390426914112958	0.077098847172977	0.0337879340402663	0.034887457699796
357	NC_037328.1:132366169:132366246	NC_037328.1	132366169	132366246	chr1	chr1:132366169:132366246	NA	repeats;CpG-deserts;inter	78	NA	NA	NA	NA	NA	NA	0.65922619047619	0.665671191553544	0.381271458426631	0.36129846102094	0.924406413419104	0.800235294117647	0.764646464646465	0.96122165796438	0.345760632167573	0.017454529021557	0.050161127148153	0.0385429871755084	0.0805476498442983	0.0355677430239632	0.036524257138687
358	NC_037328.1:132517537:132517618	NC_037328.1	132517537	132517618	chr1	chr1:132517537:132517618	3	repeats;CpG-deserts;inter	82	NA	NA	NA	NA	NA	NA	0.53803664205633	0.442989417989418	0.404411764705882	0.721731601731602	0.982950191570881	0.948578595317726	0.97718253968254	0.995238095238095	0.449194998831502	0.00725397363518305	0.0664073885224381	0.0281374957183248	0.0559795790162675	0.0258968205462112	0.0249253712520323
359	NC_037328.1:132608679:132608688	NC_037328.1	132608679	132608688	chr1	chr1:132608679:132608688	NA	repeats;CpG-deserts;inter	10	NA	NA	NA	NA	NA	NA	0.776173901173901	0.842241092241092	0.947474747474747	0.672694991535571	0.129807692307692	0.535195247783129	0.3	0.467774098208881	-0.451451923531402	0.00821005462963511	0.0780624184464988	0.0301756180924051	0.0584771066756023	0.027190075543075	0.0261151580858984
360	NC_037328.1:132917724:132917744	NC_037328.1	132917724	132917744	chr1	chr1:132917724:132917744	NA	CpG-deserts;inter	21	NA	NA	NA	NA	NA	NA	0.71547619047619	0.446481602795065	0.438384901150859	0.642331324589389	0.963117283950617	0.880488726323562	0.92186583010553	0.877206022489041	0.350000960964312	0.0119214584891928	0.0440763315170219	0.0351595737958138	0.0678177977822158	0.0291445362087969	0.0305011802895621
361	NC_037328.1:133137318:133137368	NC_037328.1	133137318	133137368	chr1	chr1:133137318:133137368	NA	repeats;CpG-deserts;inter	51	NA	NA	NA	NA	NA	NA	0.763237436343213	0.403385198211765	0.678216989066442	0.412668897417294	1	0.829053944986148	1	0.763745571295094	0.333822748810632	0.027610171640461	0.0525570900649594	0.0516316537007455	0.101185321674472	0.0464644924973487	0.0465631174813142
362	NC_037328.1:133370575:133370640	NC_037328.1	133370575	133370640	chr1	chr1:133370575:133370640	NA	repeats;CpG-deserts;inter	66	NA	NA	NA	NA	NA	NA	0.669047619047619	0.285151515151515	0.3975	0.508523119392685	0.9484375	0.696613190730838	0.967073170731707	0.844465699558956	0.399091826857421	0.00931820769042385	0.0635905137555728	0.0313138799650496	0.0613007434626893	0.0281614378637955	0.0274323435227965
363	NC_037328.1:133488705:133488779	NC_037328.1	133488705	133488779	chr1	chr1:133488705:133488779	1	CpG-deserts;inter	75	NA	NA	NA	NA	NA	NA	0.467094017094017	0.487179487179487	0.209264580672627	0.428959928959929	0.906267806267806	0.7875	0.847368421052632	0.812373737373737	0.440252987697029	0.00326263840810948	0.0635580728875728	0.0221099921549031	0.0437167433556389	0.0202289099699539	0.019295135550575
364	NC_037328.1:133509977:133509992	NC_037328.1	133509977	133509992	chr1	chr1:133509977:133509992	4	CpG-deserts;inter	16	NA	NA	NA	NA	NA	NA	0.57473544973545	0.321595071595072	0.470502645502645	0.566346153846154	0.891997234219898	0.680750317596358	0.826319961947043	0.812478892266126	0.319591771337526	0.00579362754512429	0.0384780389899226	0.0262539099725408	0.051810308886599	0.0221858923063143	0.0229916812733072
365	NC_037328.1:133763345:133763379	NC_037328.1	133763345	133763379	chr1	chr1:133763345:133763379	2	CpG-deserts;inter	35	NA	NA	NA	NA	NA	NA	0.645665199315236	0.480463619648017	0.493971094463498	0.580055210489993	0.875591161121983	0.773347398030942	0.894420394420394	0.844156249512306	0.29684001979222	0.00117182410725466	0.0289652233440365	0.0187370854800029	0.0343781995178236	0.0149402531183856	0.015096397438341
366	NC_037328.1:134007550:134007573	NC_037328.1	134007550	134007573	chr1	chr1:134007550:134007573	2	CpG-deserts;inter	24	NA	NA	NA	NA	NA	NA	0.238113354037267	0.549889947822978	0.392201426024955	0.29892904197252	0.903555745502938	0.784297924297924	0.791853569013812	0.79206189087455	0.448158839957876	0.0035944360125548	0.0666861418154126	0.0229575332187805	0.0449581117470144	0.0206780924458184	0.0198553806885232
367	NC_037328.1:134144048:134144129	NC_037328.1	134144048	134144129	chr1	chr1:134144048:134144129	NA	transcripts;introns;CpG-deserts;genes	82	NA	EPHB1	NA	NA	NA	NA	0.561425682507584	0.500097482174688	0.53664343786295	0.470767457180501	0.0935985062610274	0.346625258799172	0.0738562091503268	0.182633053221289	-0.343055258073477	0.00828893372798058	0.0409319018044476	0.0303853520380643	0.0586639932770125	0.0257189564683555	0.0262081669723416
368	NC_037328.1:134144114:134144216	NC_037328.1	134144114	134144216	chr1	chr1:134144114:134144216	NA	transcripts;introns;CpG-deserts;genes	103	NA	EPHB1	NA	NA	NA	NA	0.25	0.705882352941177	0.846153846153846	0.571428571428571	0.0833333333333333	0.166666666666667	0.25	0	-0.468366192630898	0.0272647550613537	0.0954855840845446	0.0541751600812295	0.100453570006894	0.0492764914364419	0.0462040511555966
369	NC_037328.1:134172351:134172416	NC_037328.1	134172351	134172416	chr1	chr1:134172351:134172416	6	transcripts;introns;CpG-deserts;genes	66	NA	EPHB1	NA	NA	NA	NA	0.573692810457516	0.505696849446849	0.286507936507936	0.519657724329325	0.940185830429733	0.699643493761141	0.859279609279609	0.748563218390805	0.340529207779916	0.00680872207153884	0.0450556299595826	0.0282272146501775	0.0548412517942082	0.0237186711597508	0.024393641507225
370	NC_037328.1:134237895:134237914	NC_037328.1	134237895	134237914	chr1	chr1:134237895:134237914	5	transcripts;introns;CpG-deserts;genes	20	NA	EPHB1	NA	NA	NA	NA	0.436961451247166	0.352467948717949	0.199143361048123	0.500992046858146	0.813492063492063	0.72790404040404	0.855493384624352	0.740451202969944	0.411943970904754	0.00386322469964688	0.0573626865754078	0.0228074226865902	0.0458757061049562	0.0205861679076268	0.0202698698457772
371	NC_037328.1:134261371:134261388	NC_037328.1	134261371	134261388	chr1	chr1:134261371:134261388	2	transcripts;introns;CpG-deserts;genes	18	NA	EPHB1	NA	NA	NA	NA	0.0214634146341463	0.00396825396825397	0.112033377250769	0.100690975690976	0.332608695652174	0.268091787439614	0.274074074074074	0.283932539350496	0.230137768743053	0.00100952090577369	0.0167856128548576	0.028067918866955	0.0335073733509187	0.0146112498542641	0.0146987226893639
372	NC_037328.1:134496657:134496674	NC_037328.1	134496657	134496674	chr1	chr1:134496657:134496674	5	transcripts;first intron;CpG-deserts;genes	18	NA	EPHB1	NA	NA	NA	NA	0.306276088252832	0.290856313497823	0.41017316017316	0.397175846465907	0.901556776556777	0.695104895104895	0.880735930735931	0.847056384742952	0.479993144687708	0.000295439325164797	0.0711735857098971	0.0143308501699872	0.0279779321429268	0.0128672930541629	0.0122706933019982
373	NC_037328.1:134501045:134501068	NC_037328.1	134501045	134501068	chr1	chr1:134501045:134501068	3	transcripts;first intron;CpG-deserts;genes	24	NA	EPHB1	NA	NA	NA	NA	0.178787878787879	0.264928698752228	0.167034381320096	0.218102073365231	0.695189260406652	0.515957446808511	0.675757575757576	0.466025641025641	0.381019222943237	0.0037831205085898	0.0479259809139564	0.0228505627455011	0.0456090343109486	0.0198883232059066	0.0201529755783769
374	NC_037328.1:134579593:134579649	NC_037328.1	134579593	134579649	chr1	chr1:134579593:134579649	1	CpG-deserts;inter	57	NA	NA	NA	NA	NA	NA	0.243358395989975	0.374074074074074	0.30722114764668	0.372794117647059	0.672094508301405	0.724372759856631	0.752623456790123	0.560386473429952	0.353007365755081	0.00075820450538159	0.0403551531510956	0.0162664721561718	0.032043236207621	0.0141012541744697	0.0140494063887722
375	NC_037328.1:134705812:134705827	NC_037328.1	134705812	134705827	chr1	chr1:134705812:134705827	NA	CpG-deserts;inter	16	NA	NA	NA	NA	NA	NA	0.782909604519774	0.489540166975075	0.682920391656024	0.733270202020202	0.935799663299663	0.82445054945055	1	0.839290339290339	0.227725046717369	0.0298493253698268	0.0248368657772528	0.0645615558005074	0.105632370432047	0.0395047272046306	0.0487556872041591
376	NC_037328.1:134750689:134750708	NC_037328.1	134750689	134750708	chr1	chr1:134750689:134750708	NA	CpG-deserts;inter	20	NA	NA	NA	NA	NA	NA	0.579164734203494	0.422459132906894	0.22320987654321	0.423118279569893	0.813570487483531	0.606991368285163	0.855733808674985	0.793402777777778	0.355436604749492	0.009302171591665	0.0504043964173897	0.0303150282776234	0.0612528116744651	0.0268726780360047	0.0274112248078227
377	NC_037328.1:134751769:134751805	NC_037328.1	134751769	134751805	chr1	chr1:134751769:134751805	NA	CpG-deserts;inter	37	NA	NA	NA	NA	NA	NA	0.2727213712928	0.553315018315018	0.301359663633857	0.492147147147147	0.75744560994561	0.718821011645555	0.935201588534922	0.660031053891441	0.362989015907177	0.00767903793289714	0.0519280705591021	0.0282854700395342	0.0570868193226068	0.0256019562060366	0.0254438550323484
378	NC_037328.1:134820832:134820888	NC_037328.1	134820832	134820888	chr1	chr1:134820832:134820888	1	repeats;CpG-deserts;inter	57	NA	NA	NA	NA	NA	NA	0.686401630284609	0.814299763792664	0.680464646464647	0.744745879120879	1	0.956163381172482	0.944620716472841	0.951375235025517	0.23156185325201	0.00244540337868438	0.0172571675023852	0.0405655320240983	0.0402189856726532	0.0172839287685411	0.0177269182010389
379	NC_037328.1:134858590:134858613	NC_037328.1	134858590	134858613	chr1	chr1:134858590:134858613	0	CpG-deserts;inter	24	NA	NA	NA	NA	NA	NA	0.313541666666667	0.405644152595372	0.0816509072323026	0.326388888888889	0.836018270944742	0.553629032258064	0.641983173563079	0.658931314461268	0.390834043960981	0.00556802681159592	0.0579827249260027	0.0253335635524015	0.0510871575270863	0.0233675213789844	0.0226628461775803
380	NC_037328.1:134864794:134864806	NC_037328.1	134864794	134864806	chr1	chr1:134864794:134864806	4	repeats;CpG-deserts;inter	13	NA	NA	NA	NA	NA	NA	0.531233062330623	0.453905627631729	0.456304114013978	0.446428571428571	0.801115200178432	0.666618104118104	0.858573310747224	0.755021352628845	0.298364148066926	0.00199120229620088	0.0289290955436295	0.0204801491602801	0.0384441571532798	0.0163821512159296	0.0169122038148461
381	NC_037328.1:134873970:134874033	NC_037328.1	134873970	134874033	chr1	chr1:134873970:134874033	5	CpG-deserts;inter	64	NA	NA	NA	NA	NA	NA	0.287008547008547	0.325787728026534	0.248905723905724	0.250415479582146	0.782595549104983	0.751974613763232	0.676585985853227	0.502380952380952	0.400354905644861	0.00549610941200016	0.053113747437351	0.0252050902684642	0.0508782773539477	0.0227162821295138	0.0225666458351056
382	NC_037328.1:134891208:134891229	NC_037328.1	134891208	134891229	chr1	chr1:134891208:134891229	NA	CpG-deserts;inter	22	NA	NA	NA	NA	NA	NA	0.380952380952381	0.410901027077498	0.278007518796992	0.544191919191919	0.9890625	0.621444974386151	0.829861111111111	0.553525641025641	0.344960345126028	0.0314689947141894	0.0561069931733355	0.0519337745109597	0.108877092392504	0.0496370663416309	0.0503445499321069
383	NC_037328.1:134939422:134939461	NC_037328.1	134939422	134939461	chr1	chr1:134939422:134939461	NA	CpG-deserts;inter	40	NA	NA	NA	NA	NA	NA	0.528309409888357	0.391737891737892	0.404129009392167	0.261764705882353	0.820055660292665	0.562169312169312	0.782867494824017	0.674993174993175	0.3135361563446	0.00771469558234192	0.0389599070955309	0.0288211321008682	0.0572089399437793	0.0246861928362959	0.0255014135885266
384	NC_037328.1:134956341:134956361	NC_037328.1	134956341	134956361	chr1	chr1:134956341:134956361	3	CpG-shelves;inter	21	NA	NA	NA	NA	NA	NA	0.612511671335201	0.575	0.510511178319398	0.600694444444444	0.801048934892103	0.799596839219481	0.869220806602211	0.95322391365432	0.281093300067268	0.00119605185859467	0.0257258031215866	0.0183430481095315	0.0345456424625125	0.014976170545872	0.0151689656699657
385	NC_037328.1:134994129:134994236	NC_037328.1	134994129	134994236	chr1	chr1:134994129:134994236	NA	CpG-deserts;inter	108	NA	NA	NA	NA	NA	NA	0.538461538461538	0.227920227920228	0.126050420168067	0.296057347670251	0.848888888888889	0.507936507936508	0.541666666666667	0.666666666666667	0.344167298984662	0.0262316459056261	0.057235967520482	0.0489068613680599	0.0984374060340496	0.0463469793264174	0.0452077985092595
386	NC_037328.1:134994215:134994236	NC_037328.1	134994215	134994236	chr1	chr1:134994215:134994236	NA	CpG-deserts;inter	22	NA	NA	NA	NA	NA	NA	0.500678451066717	0.49292297564187	0.166203703703704	0.444596702317291	0.898784561876472	0.51156665139716	0.874061368400991	0.864863920623275	0.386218667392079	0.0197546620334334	0.067963808630971	0.0444459408045489	0.0853521073149811	0.0416846542434025	0.0388491211579863
387	NC_037328.1:135006261:135006296	NC_037328.1	135006261	135006296	chr1	chr1:135006261:135006296	3	CpG-shelves;inter	36	NA	NA	NA	NA	NA	NA	0.530403521738567	0.476800976800977	0.369721283783784	0.531084656084656	0.994152046783626	0.711904761904762	0.943269632414369	0.796042231255646	0.384339558487605	0.00417904001032531	0.051952262076849	0.0228190105305251	0.0468509879068572	0.0204962432493663	0.0207073945574693
388	NC_037328.1:135006261:135006338	NC_037328.1	135006261	135006338	chr1	chr1:135006261:135006338	7	CpG-shelves;inter	78	NA	NA	NA	NA	NA	NA	0.4	0.301587301587302	0	0.166666666666667	0.811965811965812	1	1	0.5	0.610927960927961	0.00706402836281447	0.143391640241457	0.0337211139971967	0.055502701703315	0.0289071930052449	0.0246971955666193
389	NC_037328.1:135006465:135006510	NC_037328.1	135006465	135006510	chr1	chr1:135006465:135006510	5	CpG-shelves;inter	46	NA	NA	NA	NA	NA	NA	0.507373889726831	0.357091119802984	0.247956150130063	0.474358974358974	0.798133776792313	0.683667781493868	0.835986209174615	0.64900078369906	0.345002104285251	0.00420278972051805	0.0434373813875045	0.0240039542082173	0.0469215153081343	0.0202032491952998	0.0207393888914095
390	NC_037328.1:135105002:135105062	NC_037328.1	135105002	135105062	chr1	chr1:135105002:135105062	NA	CpG-deserts;inter	61	NA	NA	NA	NA	NA	NA	0.892382154882155	0.964285714285714	0.893574879227053	0.527737461699726	0.0927272727272727	0.501572327044025	0.319230769230769	0.5739289446186	-0.447630224118495	0.0221592115783503	0.0937106963542171	0.0490387425371277	0.0902571368639539	0.0449916991261239	0.041224903451861
391	NC_037328.1:135117082:135117143	NC_037328.1	135117082	135117143	chr1	chr1:135117082:135117143	NA	CpG-deserts;inter	62	NA	NA	NA	NA	NA	NA	0.973701298701299	0.913321123321123	0.694242857245953	0.621200720183771	0.141033073206986	0.539423590108522	0.289196396823516	0.372232076866223	-0.465145215611725	0.00781827322798486	0.0859688112644193	0.0309274378701298	0.0574655810913828	0.0269071894494037	0.0256271095370032
392	NC_037328.1:135285975:135286063	NC_037328.1	135285975	135286063	chr1	chr1:135285975:135286063	4	CpG-deserts;inter	89	NA	NA	NA	NA	NA	NA	0.528765700483092	0.379634857895727	0.371764222930552	0.144736842105263	0.910805907755408	0.803610927822174	0.716080586080586	0.738236018723824	0.43595795424184	0.00573913054868382	0.0683299349790003	0.0264839385298603	0.0516056791885946	0.024074137129875	0.0228991124589002
393	NC_037328.1:135321938:135321981	NC_037328.1	135321938	135321981	chr1	chr1:135321938:135321981	3	CpG-deserts;inter	44	NA	NA	NA	NA	NA	NA	0.355042016806723	0.546050333846944	0.382077807250221	0.506410256410256	0.954271708683473	0.685850340136054	0.869082125603865	0.821791356573965	0.385353779170803	0.00205898647168613	0.0515419008232232	0.0192787757583475	0.0387812480568807	0.0171260866159853	0.017067419610574
394	NC_037328.1:135367486:135367500	NC_037328.1	135367486	135367500	chr1	chr1:135367486:135367500	NA	transcripts;first intron;CpG-deserts;genes	15	NA	SLCO2A1	NA	NA	NA	NA	0.431623931623932	0.248315996378012	0.420787545787546	0.260583717357911	0.812874583795782	0.530775562465703	0.77949146370199	0.576666337513578	0.334624189082413	0.0103114838756967	0.0448541137263564	0.0330915372666302	0.0638954432739759	0.0275874398687685	0.0286639771140923
395	NC_037328.1:135368284:135368350	NC_037328.1	135368284	135368350	chr1	chr1:135368284:135368350	NA	transcripts;first intron;CpG-deserts;genes	67	NA	SLCO2A1	NA	NA	NA	NA	0.428328727676996	0.435212520329748	0.198119908454501	0.483885808083836	0.712399845533425	0.540804332279742	0.758735190487168	0.791149793250634	0.314385549251472	0.010356202575606	0.0405746915600543	0.032930584357211	0.0640137012129642	0.0275578836754005	0.0287192839943887
396	NC_037328.1:135378194:135378238	NC_037328.1	135378194	135378238	chr1	chr1:135378194:135378238	NA	transcripts;first intron;CpG-deserts;genes	45	NA	SLCO2A1	NA	NA	NA	NA	0.515914786967418	0.752109257164404	0.650208170699974	0.768140589569161	0.976439607577164	0.85335429769392	0.887706398348813	0.834126984126984	0.216313620836481	0.0248045808360661	0.0208578184234953	0.0862903881863928	0.0955877347051019	0.0392814897751948	0.0438085797627257
397	NC_037328.1:135390932:135391023	NC_037328.1	135390932	135391023	chr1	chr1:135390932:135391023	0	transcripts;introns;CpG-deserts;genes	92	NA	SLCO2A1	NA	NA	NA	NA	0.0166666666666667	0.0324074074074074	0.144257703081233	0.308333333333333	0.783040044046333	0.835912698412698	0.798319327731092	0.703703703703704	0.654827665851297	0.000847551066740554	0.131597325229779	0.0178589194580727	0.0327286398571129	0.0156066004059416	0.0143427799215805
398	NC_037328.1:135391080:135391112	NC_037328.1	135391080	135391112	chr1	chr1:135391080:135391112	NA	transcripts;introns;CpG-deserts;genes	33	NA	SLCO2A1	NA	NA	NA	NA	0.623232323232323	0.620634920634921	0.503307995495495	0.397069597069597	0.961767399267399	0.708062252838372	0.773290598290598	0.982222222222222	0.320274409046564	0.0113270165822317	0.0423055878510077	0.0345456537339041	0.0663439500550676	0.0281590900690182	0.0298084332596216
399	NC_037328.1:135393997:135394024	NC_037328.1	135393997	135394024	chr1	chr1:135393997:135394024	NA	transcripts;introns;CpG-deserts;genes	28	NA	SLCO2A1	NA	NA	NA	NA	0.656412294647589	0.539006723053567	0.567171717171717	0.449725878332952	0.204230410112763	0.363919413919414	0.0135135135135135	0.218607336833938	-0.353011484706549	0.00876245265459261	0.0475716261150737	0.0302001418101922	0.0598976313306583	0.0264099243526741	0.0267857539271158
400	NC_037328.1:135413458:135413560	NC_037328.1	135413458	135413560	chr1	chr1:135413458:135413560	NA	transcripts;CDS;exons;CpG-deserts;genes	103	NA	SLCO2A1	NA	NA	NA	NA	0.5543318288854	0.251733878625454	0.182874797287782	0.341060448439531	0.801956502653367	0.492159509534977	0.572195206637515	0.672066856907728	0.302094280623855	0.0290675886973264	0.0449015762555746	0.0551911505787247	0.104093682010699	0.0451356606623782	0.0479999560112789
401	NC_037328.1:135413873:135413945	NC_037328.1	135413873	135413945	chr1	chr1:135413873:135413945	NA	transcripts;introns;CpG-deserts;genes	73	NA	SLCO2A1	NA	NA	NA	NA	0.418961352657005	0.509874492432632	0.226225490196078	0.527908496732026	0.663165936872833	0.683970489604293	0.856815935923441	0.848015873015873	0.342249600849675	0.00864448441286541	0.0462543304289245	0.0308799178900971	0.0596180821704483	0.0262897001609537	0.0266578249242807
402	NC_037328.1:135488888:135488951	NC_037328.1	135488888	135488951	chr1	chr1:135488888:135488951	3	transcripts;first intron;CpG-deserts;genes	64	NA	RAB6B	NA	NA	NA	NA	0.579612403100775	0.428713151927438	0.332843763303533	0.651789077212806	0.933866102272174	0.762723387723388	0.996732026143791	0.881307965084561	0.39541777141984	0.00541348581559444	0.0578052078758364	0.0251805439350492	0.0506838886431163	0.0227392381847897	0.0224729586155919
403	NC_037328.1:135559591:135559636	NC_037328.1	135559591	135559636	chr1	chr1:135559591:135559636	NA	repeats;CpG-deserts;inter	46	NA	NA	NA	NA	NA	NA	0.776329335152865	0.926190476190476	0.775806451612903	0.791253101736973	0	0.41462281679673	0.314043209876543	0.432326335552142	-0.52714675061695	0.00900678916207067	0.0988812437208616	0.0316274798057648	0.0605057276330017	0.0294202182185277	0.0270696052235194
404	NC_037328.1:135708260:135708307	NC_037328.1	135708260	135708307	chr1	chr1:135708260:135708307	3	CpG-deserts;inter	48	NA	NA	NA	NA	NA	NA	0.385406698564593	0.327548823128091	0.279973486522316	0.581258741258741	0.768430930930931	0.819215797583327	0.842570806100218	0.825410565265313	0.420360087601512	0.00615870238353411	0.0584302961583332	0.0261556496606753	0.0529473415924184	0.0237481245334668	0.0235099590784591
405	NC_037328.1:135889913:135889938	NC_037328.1	135889913	135889938	chr1	chr1:135889913:135889938	4	repeats;CpG-deserts;inter	26	NA	NA	NA	NA	NA	NA	0.559444336945304	0.525491028604677	0.652012195121951	0.612654320987654	0.892654949121184	0.73963963963964	0.955801424343322	0.804343275771847	0.260709351804102	0.00568357325185545	0.024661218450567	0.030959764621485	0.0514057303604724	0.0206430514394134	0.0228120568343038
406	NC_037328.1:135932475:135932487	NC_037328.1	135932475	135932487	chr1	chr1:135932475:135932487	0	CpG-deserts;inter	13	NA	NA	NA	NA	NA	NA	0.466434765073603	0.305748792270531	0.384363522050089	0.486666666666667	0.842526969597908	0.712080685272175	0.867561253561254	0.805216682958618	0.396042961332266	0.000374463856759784	0.0497468956224931	0.0145024126490123	0.0285526376701157	0.0130105435981427	0.0125149765456216
407	NC_037328.1:135932475:135932534	NC_037328.1	135932475	135932534	chr1	chr1:135932475:135932534	0	CpG-deserts;inter	60	NA	NA	NA	NA	NA	NA	0.5	0.666666666666667	0.285714285714286	0.5	0.928571428571429	1	1	0.875	0.462797619047619	0.00569256138836915	0.0732247884272757	0.026382026226142	0.0514388886821232	0.0243490443391155	0.0228259690009345
408	NC_037328.1:135954318:135954363	NC_037328.1	135954318	135954363	chr1	chr1:135954318:135954363	0	transcripts;introns;CpG-deserts;genes	46	NA	BFSP2	NA	NA	NA	NA	0.688218390804598	0.65647226173542	0.572296238244514	0.742424242424242	0.327777777777778	0.235673234811166	0.363956639566396	0.00980392156862745	-0.430549889871202	0.00708437713677128	0.065985137069797	0.0279610402866358	0.0555506513440558	0.0261799778729236	0.0247217042761048
409	NC_037328.1:135983914:135984025	NC_037328.1	135983914	135984025	chr1	chr1:135983914:135984025	NA	transcripts;first intron;CpG-deserts;genes	112	NA	BFSP2	NA	NA	NA	NA	0.202216392939345	0.707099731663685	0.452697602685035	0.277040474944535	1	0.804162028396523	0.871000669759804	0.736814874509954	0.44323084260842	0.0205073527249167	0.0830953841975308	0.0454247311555071	0.0869064710048727	0.042788626954721	0.0396055635185616
410	NC_037328.1:135999630:135999670	NC_037328.1	135999630	135999670	chr1	chr1:135999630:135999670	NA	transcripts;first intron;CpG-deserts;genes	41	NA	BFSP2	NA	NA	NA	NA	0.75	0.771717171717172	0.546536796536797	0.754093893224328	0.990109427609428	0.928128323289614	0.930773825935116	0.855602548036759	0.220566565848155	0.0172335341013972	0.0200554092672096	0.0678480364898955	0.0801152307554983	0.0328079848432889	0.0363167821388737
411	NC_037328.1:136003307:136003405	NC_037328.1	136003307	136003405	chr1	chr1:136003307:136003405	NA	transcripts;first intron;repeats;CpG-deserts;genes	99	NA	BFSP2	NA	NA	NA	NA	0.347071702244116	0.292771433023887	0.482967354095349	0.792320261437908	0.81288056206089	0.91710875331565	0.969727891156463	0.974126984126984	0.439678359964682	0.0237915715209549	0.0791116379915537	0.0483238537027211	0.093532959448446	0.0462159220396441	0.0428172243573052
412	NC_037328.1:136349335:136349352	NC_037328.1	136349335	136349352	chr1	chr1:136349335:136349352	NA	transcripts;introns;repeats;CpG-deserts;genes	18	NA	TMEM108	NA	NA	NA	NA	0.567432950191571	0.533235867446394	0.376196957757241	0.315515350877193	0.879181649776615	0.697420634920635	0.912561510483526	0.659799587385794	0.339145564073543	0.00840987799257917	0.0461062796896745	0.0304406699672138	0.0589626953052109	0.026399298441052	0.0263441096867904
413	NC_037328.1:136410634:136410653	NC_037328.1	136410634	136410653	chr1	chr1:136410634:136410653	NA	transcripts;introns;repeats;CpG-deserts;genes	20	NA	TMEM108	NA	NA	NA	NA	0.608095760233918	0.354020979020979	0.251165501165501	0.21875	0.848036705078959	0.650595238095238	0.781681190994917	0.785204991087344	0.408371471209015	0.0120621341417107	0.0639378352256055	0.0349015715231472	0.0681254731588583	0.0326144042766425	0.030645020827775
414	NC_037328.1:1368521:1368592	NC_037328.1	1368521	1368592	chr1	chr1:1368521:1368592	2	repeats;CpG-deserts;inter	72	NA	NA	NA	NA	NA	NA	0.534077380952381	0.434782608695652	0.429487179487179	0.673202614379085	0.822222222222222	0.975	0.980392156862745	0.738492063492063	0.361139164765683	0.00468539892343937	0.0489159274560702	0.0243391868780536	0.0484491240099488	0.0217053983494978	0.0214445085623419
415	NC_037328.1:136892112:136892210	NC_037328.1	136892112	136892210	chr1	chr1:136892112:136892210	NA	transcripts;introns;repeats;CpG-deserts;genes	99	NA	UBA5	NA	NA	NA	NA	0.651647286821705	0.510470085470085	0.312307098765432	0.694025974025974	0.97718253968254	0.91046658259773	1	0.941395082904517	0.415148440025398	0.0145172154091327	0.0626069610213121	0.0378880035301139	0.0737117981045581	0.0341026269174763	0.0332908058415387
416	NC_037328.1:137181689:137181751	NC_037328.1	137181689	137181751	chr1	chr1:137181689:137181751	3	transcripts;introns;repeats;CpG-deserts;genes	63	NA	DNAJC13	NA	NA	NA	NA	0.996363636363636	0.956280886338275	1	0.885155122655123	0.290679278384196	0.615694444444445	0.277482993197279	0.359014872669599	-0.573732014165379	0.003120576843722	0.105888990942802	0.0225362432859384	0.0431049068164565	0.0201329726483953	0.019009073180232
417	NC_037328.1:137298104:137298151	NC_037328.1	137298104	137298151	chr1	chr1:137298104:137298151	2	repeats;CpG-deserts;inter	48	NA	NA	NA	NA	NA	NA	0.456349206349206	0.468760683760684	0.529241071428571	0.509615384615385	0.981834473769958	0.730595888628676	0.970441908106526	0.908446712018141	0.406838159092364	0.00399094087132159	0.0535639936103142	0.0227413950475246	0.0463429736419638	0.0207667712917058	0.0204742025743551
418	NC_037328.1:138589666:138589748	NC_037328.1	138589666	138589748	chr1	chr1:138589666:138589748	3	CpG-deserts;inter	83	NA	NA	NA	NA	NA	NA	0.353121935272965	0.410924557155601	0.486153846153846	0.446388888888889	0.88890972472653	0.75582221047531	0.62762496302869	0.857082911605938	0.358212645591292	0.00431338954653602	0.0439678693751031	0.0242356772774447	0.047319681896859	0.0205513320957193	0.0209191855235464
419	NC_037328.1:138726359:138726388	NC_037328.1	138726359	138726388	chr1	chr1:138726359:138726388	2	repeats;CpG-deserts;inter	30	NA	NA	NA	NA	NA	NA	0.24732905982906	0.491114561766736	0.317925579322638	0.37408293460925	0.807392924472723	0.70195374800638	0.847883597883598	0.720727000868845	0.411876283925966	0.000962824892063423	0.0550909820528043	0.0164763817575979	0.0331670123853216	0.0148604896814582	0.0145449360875872
420	NC_037328.1:139014039:139014117	NC_037328.1	139014039	139014117	chr1	chr1:139014039:139014117	5	transcripts;first intron;CpG-deserts;genes	79	NA	ATP2C1	NA	NA	NA	NA	0.267789598206054	0.235763779244383	0.324816632486585	0.320508533856126	0.910853101670795	0.86943010693388	0.925707529786181	0.683627391766429	0.560184896591034	0.000850109980932189	0.0958037587479513	0.0166847807281957	0.0327487149396189	0.0151854422239483	0.0143506517644324
421	NC_037328.1:139026790:139026820	NC_037328.1	139026790	139026820	chr1	chr1:139026790:139026820	NA	promoters;CpG-deserts;inter	31	ATP2C1	NA	NA	NA	NA	NA	0.627036836239872	0.404371584699454	0.377779039543745	0.632692307692308	0.83452271072991	0.646757044125465	0.909445933255457	0.93401841868823	0.320716084655921	0.0149653438541351	0.0448331136183735	0.0390359051088348	0.0747543442092449	0.0321763142034696	0.0337857308432385
422	NC_037328.1:139218234:139218264	NC_037328.1	139218234	139218264	chr1	chr1:139218234:139218264	2	repeats;CpG-deserts;inter	31	NA	NA	NA	NA	NA	NA	0	0	0	0.5	1	1	1	1	0.875	0.00598625569770709	0.245535714285714	0.0314931272306934	0.0524452676875373	0.0270270044904603	0.0232788420264582
423	NC_037328.1:139218261:139218301	NC_037328.1	139218261	139218301	chr1	chr1:139218261:139218301	NA	repeats;CpG-deserts;inter	41	NA	NA	NA	NA	NA	NA	0.390826873385013	0.317604617604618	0.625198412698413	0.36057181493287	0.892438358742707	0.600872885979269	0.781637717121588	0.702962962962963	0.320927551546403	0.0135360174557178	0.0440759410422604	0.037355843692163	0.071618057148776	0.0303380662257459	0.0322890988305961
424	NC_037328.1:139456973:139457057	NC_037328.1	139456973	139457057	chr1	chr1:139456973:139457057	NA	transcripts;introns;CpG-deserts;genes	85	NA	GET1	NA	NA	NA	NA	0.813323201621074	0.470521541950113	0.408001922687715	0.557342597358037	0.930188124632569	0.744588744588745	1	0.943939393939394	0.342381749885942	0.0222514787716967	0.0523751439698363	0.0434416121632571	0.0904389248569686	0.040873919288004	0.0413138202775713
425	NC_037328.1:139471080:139471136	NC_037328.1	139471080	139471136	chr1	chr1:139471080:139471136	NA	transcripts;CDS;exons;CpG-deserts;genes	57	NA	LCA5L	NA	NA	NA	NA	0.684944807630479	0.696104059139555	0.533064302388853	0.471623283459725	0.950758028233877	0.79112685560054	0.789444444444444	0.903641025641026	0.262308475325319	0.0106254155244778	0.0278328600945777	0.0360376157177368	0.0646926532082421	0.026517376896117	0.0290349414320523
426	NC_037328.1:139473337:139473403	NC_037328.1	139473337	139473403	chr1	chr1:139473337:139473403	4	transcripts;introns;repeats;CpG-deserts;genes	67	NA	LCA5L	NA	NA	NA	NA	0.34777820794081	0.200402850155125	0.367970670561032	0.571192922057888	0.938114007313271	0.873681018593809	0.835538317891259	0.62995830727538	0.447486750089716	0.00465999874372504	0.0747718613384417	0.0247166149871702	0.0483394622022995	0.022282001700576	0.0213948011780373
427	NC_037328.1:139826867:139826909	NC_037328.1	139826867	139826909	chr1	chr1:139826867:139826909	NA	promoters;CpG-deserts;inter	43	IGSF5	NA	NA	NA	NA	NA	0.323729227761486	0.329690346083789	0.277751756440281	0.447502210433245	0.811041083099907	0.436111111111111	0.61868961352657	0.664113475177305	0.287820435549023	0.0254076389211648	0.0361474684495508	0.0484165030889853	0.0967967829595012	0.0427241266437671	0.0444103790079359
428	NC_037328.1:139827514:139827622	NC_037328.1	139827514	139827622	chr1	chr1:139827514:139827622	8	transcripts;exons;first intron;5UTR;CpG-deserts;genes	109	NA	IGSF5	NA	IGSF5	NA	NA	0.333333333333333	0.333333333333333	0.5	0.285714285714286	1	0.677777777777778	0.806060606060606	0.654970760233918	0.421607047922837	0.00628838419572531	0.0652970965736732	0.0272977597625719	0.0532955685226515	0.0246452419303265	0.023683725703177
429	NC_037328.1:139827571:139827622	NC_037328.1	139827571	139827622	chr1	chr1:139827571:139827622	8	transcripts;first intron;CpG-deserts;genes	52	NA	IGSF5	NA	NA	NA	NA	0.444513081395349	0.32481327511526	0.247099952516619	0.447344950908525	0.761172562048075	0.654281045751634	0.812765068503949	0.838280141843972	0.400681889552969	0.000841988030513623	0.0528030101639163	0.0163725851230408	0.0326894415952901	0.0146188845485893	0.0143218962953877
430	NC_037328.1:139827802:139827872	NC_037328.1	139827802	139827872	chr1	chr1:139827802:139827872	NA	transcripts;first intron;CpG-deserts;genes	71	NA	IGSF5	NA	NA	NA	NA	0.21946972250309	0.182967032967033	0.322206439393939	0.577651515151515	0.672026992615228	0.587103174603175	0.969654528478058	0.576190476190476	0.37567011546784	0.0261787052569585	0.0684242439039105	0.0499440052939595	0.0983453706513979	0.0473695084931379	0.0451598706555853
431	NC_037328.1:139888147:139888195	NC_037328.1	139888147	139888195	chr1	chr1:139888147:139888195	NA	CpG-deserts;inter	49	NA	NA	NA	NA	NA	NA	0.293290043290043	0.595959595959596	0.474233107877297	0.419826285952047	0.845256754739513	0.63786231884058	0.708730158730159	0.53998778998779	0.237131997304765	0.0385253381687679	0.0298903747540486	0.0684835907605851	0.122261118792169	0.0494045207854395	0.0570313837378572
432	NC_037328.1:139917552:139917585	NC_037328.1	139917552	139917585	chr1	chr1:139917552:139917585	3	CpG-deserts;inter	34	NA	NA	NA	NA	NA	NA	0.584286907875618	0.526041666666667	0.392998405103668	0.468952429149798	0.797260994793398	0.761544358864641	0.87741632395299	0.810325476992144	0.318566936451856	0.0012236797123097	0.0328597148840401	0.0178077092833475	0.0347072635979902	0.0150346235103027	0.0152347003719608
433	NC_037328.1:139941020:139941085	NC_037328.1	139941020	139941085	chr1	chr1:139941020:139941085	3	transcripts;first intron;CpG-deserts;genes	66	NA	PCP4	NA	NA	NA	NA	0.415958605664488	0.403333086071755	0.30315587820125	0.46127416724901	0.940392156862745	0.679816784869976	0.884448884448885	0.737637362637363	0.414643362908116	0.00244451744929963	0.0574169343122478	0.0201846182546691	0.0402144728052352	0.0180675112341262	0.0177250600317992
434	NC_037328.1:139990801:139990821	NC_037328.1	139990801	139990821	chr1	chr1:139990801:139990821	NA	transcripts;introns;CpG-deserts;genes	21	NA	PCP4	NA	NA	NA	NA	0.415099620493359	0.323027085442689	0.291761244220261	0.4375	0.9659403839055	0.531120689655172	0.599996863040341	0.803289429246876	0.358239853922895	0.0298558563240747	0.0555637496708299	0.0522836715159043	0.105643346183293	0.0481493363964137	0.0487604085793988
435	NC_037328.1:140468074:140468084	NC_037328.1	140468074	140468084	chr1	chr1:140468074:140468084	2	CpG-deserts;inter	11	NA	NA	NA	NA	NA	NA	0.305914750957854	0.281030020703934	0.318518919504141	0.343534482758621	0.78363523573201	0.633232193565955	0.608730158730159	0.710913117889862	0.371878132998359	0.00134334157410888	0.0425019831983512	0.0176282491816989	0.0353124602410728	0.0154485741097458	0.015510146805736
436	NC_037328.1:140468157:140468212	NC_037328.1	140468157	140468212	chr1	chr1:140468157:140468212	NA	CpG-deserts;inter	56	NA	NA	NA	NA	NA	NA	0.408045977011494	0.304761904761905	0.402380952380952	0.353864734299517	0.791420271812429	0.70639834881321	0.785079365079365	0.510916619612272	0.331190259215852	0.0101722358556646	0.0396766373016445	0.0320873449214323	0.0634960275013216	0.0269353498364969	0.0284749734770567
437	NC_037328.1:140733617:140733667	NC_037328.1	140733617	140733667	chr1	chr1:140733617:140733667	5	CpG-deserts;inter	51	NA	NA	NA	NA	NA	NA	0.315374677002584	0.428181108508977	0.189913751397161	0.46031746031746	0.769945355191257	0.661106858868053	0.81489720256151	0.843901196842373	0.424015904059253	0.00193783303391467	0.0605698110600454	0.0190783877690796	0.038065693826312	0.0171405374762654	0.0167383350594599
438	NC_037328.1:141091108:141091198	NC_037328.1	141091108	141091198	chr1	chr1:141091108:141091198	1	CpG-deserts;inter	91	NA	NA	NA	NA	NA	NA	0	0.333333333333333	0.333333333333333	0.333333333333333	1	0.666666666666667	0.833333333333333	0.666666666666667	0.541666666666667	0.00335990948770373	0.106646825396825	0.0231220424998001	0.0440981693716123	0.0206782425084441	0.0194686193346576
439	NC_037328.1:141341664:141341704	NC_037328.1	141341664	141341704	chr1	chr1:141341664:141341704	2	repeats;CpG-deserts;inter	41	NA	NA	NA	NA	NA	NA	0.273373983739837	0.2717044859902	0.616071428571428	0.351190476190476	1	0.615746776763726	0.898912198912199	0.851661020139281	0.463494905330816	0.00691973456070841	0.0841118957048572	0.0289863407767935	0.0551417480042934	0.0256804492993877	0.0245379140328416
440	NC_037328.1:141346391:141346453	NC_037328.1	141346391	141346453	chr1	chr1:141346391:141346453	NA	repeats;CpG-deserts;inter	63	NA	NA	NA	NA	NA	NA	0.608625730994152	0.358367346938776	0.35062358276644	0.380094043887147	0.0522282718289978	0.153830323609611	0.281196943972835	0.286482334869432	-0.23099320757641	0.0328091978299026	0.0271841379077629	0.0656703010069918	0.111488317119425	0.0422648270545364	0.0516453646354626
441	NC_037328.1:141357666:141357704	NC_037328.1	141357666	141357704	chr1	chr1:141357666:141357704	NA	repeats;CpG-deserts;inter	39	NA	NA	NA	NA	NA	NA	0.500690131124914	0.532643427741467	0.325352112676056	0.31875	0.919211269785982	0.545385465598232	0.736590038314176	0.645706479313037	0.292364395367248	0.0272656880319215	0.0407225096583386	0.0501597112826175	0.100454705659609	0.0424957763625866	0.046204509339648
442	NC_037328.1:141357864:141357937	NC_037328.1	141357864	141357937	chr1	chr1:141357864:141357937	NA	CpG-deserts;inter	74	NA	NA	NA	NA	NA	NA	0.506410256410256	0.272619047619048	0.473958333333333	0.620289855072464	0.877305443094917	0.671212121212121	0.665674603174603	0.875183823529412	0.304024624643988	0.018701798446871	0.0415624648277695	0.0432361709780127	0.0832218008210649	0.0364869446648732	0.0378114424049476
443	NC_037328.1:141425318:141425335	NC_037328.1	141425318	141425335	chr1	chr1:141425318:141425335	1	transcripts;first intron;repeats;CpG-deserts;genes	18	NA	BACE2	NA	NA	NA	NA	0.374417249417249	0.284456555916571	0.0398148148148148	0.446753246753247	0.854954954954955	0.615948275862069	0.923397435897436	0.745978087511268	0.498709221830962	0.00495767225487342	0.092262674534573	0.0255479675519786	0.0493260638409901	0.022933249165026	0.021853544638913
444	NC_037328.1:141452074:141452120	NC_037328.1	141452074	141452120	chr1	chr1:141452074:141452120	3	transcripts;introns;CpG-deserts;genes	47	NA	BACE2	NA	NA	NA	NA	0.701679929266136	0.634887334887335	0.713704994192799	0.759523809523809	0.0686868686868687	0.272819660014782	0.0438218390804598	0.0196078431372549	-0.601214964237678	0.000591407186362835	0.110189743997387	0.0157585515469131	0.0304453901531846	0.0142090145098098	0.0133489709600717
445	NC_037328.1:141488292:141488345	NC_037328.1	141488292	141488345	chr1	chr1:141488292:141488345	NA	CpG-deserts;inter;downstream	54	NA	NA	NA	NA	NA	BACE2	0.494693478564446	0.468503118503119	0.163784461152882	0.489538239538239	0.816901408450704	0.566752136752137	0.903107898390917	0.665921668795232	0.334040953657576	0.0230844012325993	0.0526542793004577	0.045668475062414	0.0921223341916851	0.0416998952717812	0.0421353181989995
446	NC_037328.1:141496128:141496190	NC_037328.1	141496128	141496190	chr1	chr1:141496128:141496190	NA	repeats;CpG-deserts;inter	63	NA	NA	NA	NA	NA	NA	0.30319535221496	0.433150183150183	0.228417196838249	0.412337662337662	0.86769943019943	0.496982473544973	0.85421146953405	0.656575240066701	0.374592054701025	0.0156478848065733	0.0574089330340712	0.0379440540366249	0.0762687440990538	0.03453286917311	0.0344937514422835
447	NC_037328.1:141520993:141521056	NC_037328.1	141520993	141521056	chr1	chr1:141520993:141521056	NA	CpG-shelves;repeats;inter	64	NA	NA	NA	NA	NA	NA	0.539122240755584	0.513420454289638	0.573550420168067	0.52067417084389	0.942414431410375	0.655265151515152	0.92863475177305	0.88470880069025	0.316063962332912	0.0160065828366107	0.0365393253528153	0.038330127331048	0.0771333607421707	0.0325941675173351	0.0349057572888537
448	NC_037328.1:141521186:141521206	NC_037328.1	141521186	141521206	chr1	chr1:141521186:141521206	NA	CpG-shelves;inter	21	NA	NA	NA	NA	NA	NA	0.41281512605042	0.489015151515152	0.505813953488372	0.43630081300813	0.950348508086136	0.547911889375304	0.861359570661896	0.756528964862298	0.31805097223089	0.031162438547479	0.0425839827180301	0.0540050294183889	0.108285535627994	0.0479757835618274	0.0500560745013603
449	NC_037328.1:141558123:141558199	NC_037328.1	141558123	141558199	chr1	chr1:141558123:141558199	5	repeats;CpG-deserts;inter	77	NA	NA	NA	NA	NA	NA	0.61038961038961	0.493441881501583	0.647554697554698	0.5999333999334	0.111111111111111	0.286594202898551	0.196127946127946	0.209713869145252	-0.386943115024108	0.000222477985995584	0.0468696471883695	0.0138974016209176	0.027176615850912	0.0124713681838704	0.0119227590223357
450	NC_037328.1:141620729:141620739	NC_037328.1	141620729	141620739	chr1	chr1:141620729:141620739	NA	promoters;CpG-deserts;inter	11	MX2	NA	NA	NA	NA	NA	0.600714285714286	0.531501169712552	0.296498357735345	0.379166666666667	0.747793656068831	0.669209186625014	1	0.745316558559343	0.338609730356085	0.0148787708727931	0.0499574266374657	0.0377239388874595	0.074554524001844	0.0336803846763968	0.0336921522089006
451	NC_037328.1:141624873:141624904	NC_037328.1	141624873	141624904	chr1	chr1:141624873:141624904	1	transcripts;first intron;CpG-deserts;genes	32	NA	MX2	NA	NA	NA	NA	0.558333333333333	0.450898308041165	0.277451106812809	0.549404761904762	0.978474357097545	0.759469146565921	0.937843956809474	0.894767256496094	0.433616801719241	0.00226445756358704	0.0648946808079095	0.0200920865524303	0.0395689795228344	0.0181236537705858	0.0174232915931341
452	NC_037328.1:141708866:141708925	NC_037328.1	141708866	141708925	chr1	chr1:141708866:141708925	5	CpG-shelves;inter	60	NA	NA	NA	NA	NA	NA	0.435989913206662	0.321908602150538	0.233076923076923	0.389727463312369	0.886895328208161	0.689938408191806	0.916387959866221	0.84735632183908	0.489968779089694	0.000361407936261765	0.0762844241731378	0.0146144748524503	0.0283929788059894	0.0132217599949789	0.012452067583492
453	NC_037328.1:141751290:141751369	NC_037328.1	141751290	141751369	chr1	chr1:141751290:141751369	5	CpG-deserts;inter	80	NA	NA	NA	NA	NA	NA	0.438865546218487	0.423191094619666	0.301275434243176	0.4275	0.764503042596349	0.768742784992785	0.630734920743841	0.639985834150594	0.30328362685056	0.000983302916925274	0.0305390974587696	0.0176319835174052	0.0333428557782838	0.0144823879623794	0.0146209959042872
454	NC_037328.1:141752073:141752118	NC_037328.1	141752073	141752118	chr1	chr1:141752073:141752118	NA	CpG-deserts;inter	46	NA	NA	NA	NA	NA	NA	0.561029550159985	0.539355742296919	0.555314009661836	0.527083333333333	0.876062616628654	0.638846673421142	0.738961038961039	0.770979020979021	0.210516678634446	0.0215723385372719	0.0168576069741113	0.167455553499125	0.0891335268775284	0.0365732766135737	0.0406791431047679
455	NC_037328.1:141797604:141797661	NC_037328.1	141797604	141797661	chr1	chr1:141797604:141797661	NA	CpG-deserts;inter	58	NA	NA	NA	NA	NA	NA	0.367179970386324	0.120025311373932	0.35373642011814	0.358829766724504	0.85467223718782	0.563944179210304	0.645471590351108	0.469696026558772	0.333503141176276	0.0190812827551759	0.0494902111854324	0.0424315713416743	0.0839977835058135	0.0368586352880252	0.0381853782105845
456	NC_037328.1:141890763:141890831	NC_037328.1	141890763	141890831	chr1	chr1:141890763:141890831	NA	CpG-deserts;inter	69	NA	NA	NA	NA	NA	NA	0.4	0	0.25	0.4	1	0.4	1	1	0.5875	0.0207887149744647	0.152455357142857	0.0591090613586264	0.0874693817358205	0.0488716683323469	0.0398726939486388
457	NC_037328.1:141965844:141965860	NC_037328.1	141965844	141965860	chr1	chr1:141965844:141965860	2	repeats;CpG-deserts;inter	17	NA	NA	NA	NA	NA	NA	0.648408385093168	0.472336877214926	0.312975626812105	0.565988733093996	0.945696189428738	0.828318211817265	0.990036014405762	0.782275641025641	0.386654108615803	0.00590806196057436	0.0556567729360625	0.0255692844574289	0.0521773012588481	0.0233106754481638	0.0231570913833372
458	NC_037328.1:141969336:141969359	NC_037328.1	141969336	141969359	chr1	chr1:141969336:141969359	NA	CpG-deserts;inter	24	NA	NA	NA	NA	NA	NA	0.50515873015873	0.651986076986077	0.341145151435803	0.681341911764706	0.88478736710444	0.85641456582633	0.883333333333333	0.793348197696024	0.309562898403703	0.0245766678819545	0.0386184995291371	0.0484472969654954	0.0951091171505974	0.0409807960407989	0.0435837619415947
459	NC_037328.1:141977622:141977657	NC_037328.1	141977622	141977657	chr1	chr1:141977622:141977657	3	CpG-deserts;inter	36	NA	NA	NA	NA	NA	NA	0.389904479578393	0.241911597174755	0.298710317460317	0.211870026525199	0.928269416215414	0.781818181818182	0.754901960784314	0.742121848739496	0.516178746704685	0.000119118370884326	0.0819188256662562	0.0131929322292256	0.0256013282216543	0.0120703002623651	0.011195379803534
460	NC_037328.1:141977940:141977953	NC_037328.1	141977940	141977953	chr1	chr1:141977940:141977953	2	CpG-deserts;inter	14	NA	NA	NA	NA	NA	NA	0.41029776674938	0.184472934472934	0.170833333333333	0.208333333333333	1	0.647145641882484	0.711960405946255	0.790909090909091	0.544019442712212	0.00166078664799917	0.100044369059891	0.0189423826608917	0.0369614004607926	0.0173007864067597	0.0162284662678744
461	NC_037328.1:141979991:141980049	NC_037328.1	141979991	141980049	chr1	chr1:141979991:141980049	NA	CpG-deserts;inter	59	NA	NA	NA	NA	NA	NA	0.413565162907268	0.487912087912088	0.432046070460705	0.488898935101467	0.733560298102981	0.739181870760818	0.738888888888889	0.551587301587302	0.235199025739615	0.00941788768721776	0.0201391047979994	0.0474803695544095	0.0615093512893674	0.0256019562060366	0.0275290847987376
462	NC_037328.1:141990107:141990203	NC_037328.1	141990107	141990203	chr1	chr1:141990107:141990203	5	CpG-deserts;inter	97	NA	NA	NA	NA	NA	NA	0.343627450980392	0.151932644469958	0.0720720720720721	0.390553931124107	0.793604312354312	0.81429070580014	0.902777777777778	0.518025078369906	0.517627943913902	0.00379105936352748	0.0983170699288838	0.023507811315523	0.0456234266793936	0.0218963977396461	0.0201594593765841
463	NC_037328.1:141990237:141990339	NC_037328.1	141990237	141990339	chr1	chr1:141990237:141990339	2	CpG-deserts;inter	103	NA	NA	NA	NA	NA	NA	0.462554112554113	0.221165413533835	0.225883256528418	0.23220320386219	1	0.837153700189753	0.973333333333333	0.950840336134454	0.654880345794746	0.000234779583086744	0.130717696068674	0.01433274884697	0.02744439068009	0.0129233654354287	0.0120384023016839
464	NC_037328.1:141995810:141995894	NC_037328.1	141995810	141995894	chr1	chr1:141995810:141995894	4	CpG-deserts;inter	85	NA	NA	NA	NA	NA	NA	0.0972590627763042	0.0650793650793651	0.396296296296296	0.261363636363636	0.828717948717949	0.684920634920635	0.869246031746032	0.618530020703934	0.545354068893237	0.00167507277519361	0.10110206535448	0.0191315598043727	0.0370186131263341	0.0170530839233801	0.0162618131038353
465	NC_037328.1:141995986:141996074	NC_037328.1	141995986	141996074	chr1	chr1:141995986:141996074	NA	CpG-deserts;inter	89	NA	NA	NA	NA	NA	NA	0.417980960500142	0.545157456922163	0.205600479185385	0.715277777777778	0.997395833333333	0.683894230769231	0.926176660219213	0.887380593262946	0.402707660799814	0.0243292460931624	0.0738619503646994	0.0501389531991082	0.0946082414454828	0.0460616196747733	0.0433387317896177
466	NC_037328.1:142031325:142031373	NC_037328.1	142031325	142031373	chr1	chr1:142031325:142031373	NA	transcripts;first intron;CpG-deserts;genes	49	NA	RIPK4	NA	NA	NA	NA	0.358658103439887	0.39573732718894	0.271581196581197	0.31962481962482	0.838874859708193	0.56315219250727	0.764152919612464	0.587386469739411	0.351991248683123	0.00868622053973458	0.0443666911926189	0.0308724702919412	0.0597285727666242	0.0253952689509232	0.0267114512541279
467	NC_037328.1:142035374:142035442	NC_037328.1	142035374	142035442	chr1	chr1:142035374:142035442	4	transcripts;first intron;CpG-shores;genes	69	NA	RIPK4	NA	NA	NA	NA	0.474292615596963	0.440961337513062	0.298142717497556	0.560363247863248	0.901201952352848	0.972027972027972	0.85578559926386	0.733791360657032	0.422261741457721	0.00129004102439286	0.0603449344525804	0.0175111904475633	0.0350148367407973	0.015727765646451	0.0153798463680156
468	NC_037328.1:142035575:142035600	NC_037328.1	142035575	142035600	chr1	chr1:142035575:142035600	NA	transcripts;first intron;CpG-shores;genes	26	NA	RIPK4	NA	NA	NA	NA	0.593137254901961	0.395561002178649	0.386883594120436	0.235526315789474	0.818571428571429	0.496920289855072	0.713293650793651	0.74775641025641	0.29135840312151	0.0278661047487646	0.0417020433313933	0.0541198796918581	0.101679622260565	0.0437143464698779	0.0468041957424743
469	NC_037328.1:142036233:142036299	NC_037328.1	142036233	142036299	chr1	chr1:142036233:142036299	8	transcripts;first intron;CpG-shores;genes	67	NA	RIPK4	NA	NA	NA	NA	0.166666666666667	0.384615384615385	0.166666666666667	0	0.875	0.666666666666667	0.8	0.666666666666667	0.572596153846154	0.00154887778040868	0.10890731397342	0.0188531605077393	0.0364709640168154	0.0169080658177316	0.0160152706433514
470	NC_037328.1:142036286:142036299	NC_037328.1	142036286	142036299	chr1	chr1:142036286:142036299	6	transcripts;first intron;CpG-shores;genes	14	NA	RIPK4	NA	NA	NA	NA	0.333221326164875	0.225672877846791	0.159630503144654	0.390151515151515	0.928882893888493	0.526957153231663	0.669210419210419	0.712121212121212	0.432123864035988	0.00688975540414444	0.0698452604511826	0.0282854700395342	0.0550753294855631	0.026019616824379	0.0245062898159038
471	NC_037328.1:142061108:142061141	NC_037328.1	142061108	142061141	chr1	chr1:142061108:142061141	NA	CpG-deserts;inter	34	NA	NA	NA	NA	NA	NA	0.406547619047619	0.328216415523826	0.12759385021694	0.21264367816092	0.637222222222222	0.321336429308566	0.668328031106398	0.702777777777778	0.313665724366415	0.0303828634022362	0.0479148412159477	0.0545282431395619	0.106658131764392	0.0472603140140549	0.049268261851419
472	NC_037328.1:142069067:142069101	NC_037328.1	142069067	142069101	chr1	chr1:142069067:142069101	NA	CpG-shores;repeats;inter	35	NA	NA	NA	NA	NA	NA	0.202861952861953	0.480253531106079	0.280347384855582	0.380952380952381	0.472411186696901	0.576662561576355	0.711800104657248	0.609521687462864	0.256495072654343	0.0175341702937551	0.0292037876686368	0.0459070239017653	0.0807225702740061	0.032723981325956	0.0366074674652756
473	NC_037328.1:142099699:142099729	NC_037328.1	142099699	142099729	chr1	chr1:142099699:142099729	NA	CpG-shelves;inter	31	NA	NA	NA	NA	NA	NA	0.658730158730159	0.568714821763602	0.426879910213244	0.67979797979798	1	0.729648400380108	0.811255411255411	0.742755991285403	0.237384233103984	0.0313997359362787	0.028426720560515	0.0638602567580839	0.108753814248374	0.0438613735538504	0.0502861370822209
474	NC_037328.1:142099971:142100039	NC_037328.1	142099971	142100039	chr1	chr1:142099971:142100039	2	CpG-shelves;inter	69	NA	NA	NA	NA	NA	NA	0.30337258800009	0.481522946179945	0.229023912187815	0.509267644547941	0.733191936703404	0.788854271459535	0.879147897490557	0.74541156921608	0.405854645988446	0.00462770058199012	0.0568907303417608	0.0234649677557244	0.0482148478011317	0.0216291334102324	0.0213358241964247
475	NC_037328.1:142137978:142138019	NC_037328.1	142137978	142138019	chr1	chr1:142137978:142138019	6	CpG-deserts;inter	42	NA	NA	NA	NA	NA	NA	0.326682244958107	0.319313621871167	0.266514578339927	0.636630983032328	0.912725762464893	0.75020535020535	0.935274216524216	0.781627647714604	0.457672887176883	0.00603921808470985	0.0756741351770082	0.0266765080623889	0.0526141786592569	0.0247346749456623	0.0233607618015506
476	NC_037328.1:142138982:142139030	NC_037328.1	142138982	142139030	chr1	chr1:142138982:142139030	NA	CpG-deserts;inter	49	NA	NA	NA	NA	NA	NA	0.255050505050505	0.557397959183673	0.294427191166322	0.320261437908497	0.903447920348769	0.588939393939394	0.813750532141337	0.580357142857143	0.364839473994411	0.0144452744588454	0.0573060546971402	0.0366440888003945	0.0735400196115344	0.0329809989999568	0.033207224701133
477	NC_037328.1:142147623:142147675	NC_037328.1	142147623	142147675	chr1	chr1:142147623:142147675	NA	transcripts;introns;CpG-deserts;genes	53	NA	C2CD2	NA	NA	NA	NA	0.727462121212121	0.59244595274007	0.773287411526795	0.782288574588208	0.939733135656041	0.907344561756326	1	0.939028153634335	0.227655447744877	0.00828395279088461	0.0187415792583437	0.0446974226272606	0.0586639932770125	0.0244935315512945	0.0262081669723416
478	NC_037328.1:142200795:142200803	NC_037328.1	142200795	142200803	chr1	chr1:142200795:142200803	NA	transcripts;first intron;CpG-shelves;genes	9	NA	C2CD2	NA	NA	NA	NA	0.434361766485178	0.467171717171717	0.345717234262126	0.576874087710001	0.794940476190476	0.583174178762414	0.804347826086957	0.76172383749652	0.280015378226836	0.0074161210501468	0.0309065597062665	0.0299171346314574	0.056383296273996	0.023332084248698	0.0251183992948207
479	NC_037328.1:142201964:142201993	NC_037328.1	142201964	142201993	chr1	chr1:142201964:142201993	NA	transcripts;first intron;CpG-shelves;repeats;genes	30	NA	C2CD2	NA	NA	NA	NA	0.442915832999867	0.373862781954887	0.164730848861284	0.447669372054618	0.98757912891854	0.533246005202527	0.855170034030604	0.955666666666667	0.475620749736921	0.0114235019241111	0.0906528357794548	0.0349191142024338	0.0665982161437013	0.0320570310377986	0.029927959209892
480	NC_037328.1:142203615:142203724	NC_037328.1	142203615	142203724	chr1	chr1:142203615:142203724	NA	transcripts;first intron;CpG-shores;repeats;genes	110	NA	C2CD2	NA	NA	NA	NA	0.216666666666667	0.358024691358025	0.301010101010101	0.437229437229437	1	0.833333333333333	0.5625	0.606060606060606	0.422240760782427	0.0181567763716979	0.0725498240168514	0.0427184058413423	0.0820540447818673	0.0401669758779403	0.0372500056608547
481	NC_037328.1:142207742:142207839	NC_037328.1	142207742	142207839	chr1	chr1:142207742:142207839	NA	CpG-shelves;inter	98	NA	NA	NA	NA	NA	NA	0.2	0.333333333333333	0.2	0.133333333333333	0.875	0.4	1	0.75	0.539583333333334	0.0199946119129153	0.114840029761905	0.0455902392146713	0.085837739381662	0.0432497602634196	0.0390853655497696
482	NC_037328.1:142207950:142207959	NC_037328.1	142207950	142207959	chr1	chr1:142207950:142207959	5	CpG-shelves;inter	10	NA	NA	NA	NA	NA	NA	0.418498168498169	0.380132373624555	0.160838293650794	0.494028826355525	0.911274233013363	0.948157826816363	0.946057672917927	0.882730015082956	0.558680521425392	0.00337840548344193	0.0983684183322376	0.0228074226865902	0.0441613001483877	0.0209137056937708	0.0194942442088859
483	NC_037328.1:142210287:142210355	NC_037328.1	142210287	142210355	chr1	chr1:142210287:142210355	3	CpG-deserts;inter	69	NA	NA	NA	NA	NA	NA	0.153872053872054	0.353759820426487	0.17969696969697	0.163440860215054	0.703339460784314	0.553968253968254	0.711111111111111	0.678300094966762	0.448987304154969	0.000385450795026874	0.0637300649441849	0.0147261341767181	0.0286349730996154	0.0131335410428672	0.012546922452561
484	NC_037328.1:142234376:142234467	NC_037328.1	142234376	142234467	chr1	chr1:142234376:142234467	NA	CpG-shelves;inter;downstream	92	NA	NA	NA	NA	NA	ZBTB21	0.776190476190476	0.631766381766382	0.446253724989357	0.621946414499606	0.997863247863248	0.779579456303594	0.875938875938876	0.985714285714286	0.290734717093546	0.0156252492907369	0.0364853151276787	0.0384173560344596	0.0762116734202111	0.0326763632480077	0.0344684339291756
485	NC_037328.1:142312264:142312306	NC_037328.1	142312264	142312306	chr1	chr1:142312264:142312306	2	repeats;CpG-deserts;inter	43	NA	NA	NA	NA	NA	NA	0.495098039215686	0.529393939393939	0.36103258443684	0.335680949167791	0.149335232668566	0.231701366297983	0.109149135464925	0	-0.307754944445696	0.00401203586889001	0.0350035572967402	0.0230703210986546	0.0463836394853934	0.0199253501875995	0.0204918080219268
486	NC_037328.1:142316548:142316646	NC_037328.1	142316548	142316646	chr1	chr1:142316548:142316646	NA	CpG-deserts;inter	99	NA	NA	NA	NA	NA	NA	0.567619047619048	0.269356725146199	0.324702380952381	0.32724411603722	0.878769841269841	0.719269102990033	0.760912698412698	0.507294429708223	0.344330950656487	0.015536264852202	0.0517498020994563	0.0378296331432904	0.0760418545179834	0.0344007108999776	0.0343838608153388
487	NC_037328.1:142386150:142386157	NC_037328.1	142386150	142386157	chr1	chr1:142386150:142386157	NA	CpG-deserts;inter	8	NA	NA	NA	NA	NA	NA	0.468658625730994	0.272040142276423	0.0773805439282692	0.28692159651912	0.759958720330237	0.57125	0.519973544973545	0.622222222222222	0.342100894767799	0.0149511561850622	0.0489617358238529	0.037640149196109	0.0747237475406168	0.033607999980553	0.0337700505619496
488	NC_037328.1:142387030:142387071	NC_037328.1	142387030	142387071	chr1	chr1:142387030:142387071	NA	repeats;CpG-deserts;inter	42	NA	NA	NA	NA	NA	NA	0.639313725490196	0.40391043582567	0.694664423855677	0.494810529845741	0.94856529566542	0.69031405782652	0.772732383808096	0.817522306995991	0.249108732319686	0.0283204722812463	0.0302966853513897	0.0558691396765857	0.102616068235903	0.0415091112912286	0.0472627154933269
489	NC_037328.1:142416456:142416533	NC_037328.1	142416456	142416533	chr1	chr1:142416456:142416533	NA	repeats;CpG-deserts;inter	78	NA	NA	NA	NA	NA	NA	0.366381766381766	0.64022039004281	0.196816888045541	0.273421602787456	0.906335771508185	0.643508771929824	0.788112505432421	0.658209150326797	0.379831387984914	0.0206632330464038	0.0637927004084718	0.0457644507520552	0.0871940273568962	0.0400683616763674	0.0397421264743065
490	NC_037328.1:142417367:142417416	NC_037328.1	142417367	142417416	chr1	chr1:142417367:142417416	NA	CpG-deserts;inter	50	NA	NA	NA	NA	NA	NA	0.273396825396825	0.300258620689655	0.360839160839161	0.166958443854996	0.622857142857143	0.577556818181818	0.944621769477457	1	0.510895669933945	0.0127990098582795	0.0975329857431543	0.0378821963027576	0.0699800907991914	0.0335358277417686	0.0315007479913099
491	NC_037328.1:142421169:142421238	NC_037328.1	142421169	142421238	chr1	chr1:142421169:142421238	4	CpG-deserts;inter	70	NA	NA	NA	NA	NA	NA	0.2	0.431547619047619	0.166666666666667	0	0.742424242424243	0.8	1	1	0.686052489177489	0.00109807276699366	0.155723146718226	0.0188986810817976	0.0340266783789053	0.0164123276457913	0.0149333744132977
492	NC_037328.1:142428311:142428389	NC_037328.1	142428311	142428389	chr1	chr1:142428311:142428389	NA	repeats;CpG-deserts;inter	79	NA	NA	NA	NA	NA	NA	0.682539682539682	0.259259259259259	0.422222222222222	0.518518518518518	1	0.712121212121212	0.759259259259259	0.833333333333333	0.355543530543531	0.0197668577759494	0.0563992408683366	0.0417569125087799	0.0853762791491012	0.038781901616841	0.0388612592620668
493	NC_037328.1:142442309:142442336	NC_037328.1	142442309	142442336	chr1	chr1:142442309:142442336	0	CpG-deserts;inter	28	NA	NA	NA	NA	NA	NA	0.508053221288515	0.564736673432326	0.52960410038883	0.551452991452991	0.934081651984465	0.835858585858586	1	0.773941798941799	0.347508762555547	0.0046664726191016	0.0391094291788425	0.0243199365273458	0.0483608453364018	0.0209876563661418	0.0214047472403575
494	NC_037328.1:142509150:142509207	NC_037328.1	142509150	142509207	chr1	chr1:142509150:142509207	4	transcripts;introns;CpG-deserts;genes	58	NA	ABCG1	NA	NA	NA	NA	0.467233308696723	0.452251325538997	0.448195404335755	0.643884341240673	0.900893168134547	0.836106971352873	0.961805555555555	0.911618625277162	0.399714985126997	0.000947287736277104	0.0506087980149048	0.0166127436111485	0.0330159658833074	0.0147863329909437	0.0144774733649429
495	NC_037328.1:142521474:142521495	NC_037328.1	142521474	142521495	chr1	chr1:142521474:142521495	1	transcripts;introns;repeats;CpG-deserts;genes	22	NA	ABCG1	NA	NA	NA	NA	0.469007547100853	0.568402611880873	0.525446775446775	0.488457451946296	0.168706293706294	0.276711560044893	0.010752688172043	0.211569367292038	-0.345893619289882	0.00513602212103855	0.0404979843288374	0.0253335635524015	0.0498268654052798	0.0219218942267908	0.0220856011568044
496	NC_037328.1:142541434:142541445	NC_037328.1	142541434	142541445	chr1	chr1:142541434:142541445	NA	transcripts;CDS;exons;CpG-deserts;genes	12	NA	ABCG1	NA	NA	NA	NA	0.620604006204536	0.594852045686449	0.486536739579336	0.555811003646742	0.996732026143791	0.660809178743961	0.857434044425914	0.863888888888889	0.280265085771373	0.0199540835857566	0.0321113773192557	0.0467059564299453	0.0857517896509059	0.0347586083478969	0.0390432513742481
497	NC_037328.1:142546297:142546316	NC_037328.1	142546297	142546316	chr1	chr1:142546297:142546316	NA	transcripts;CDS;exons;CpG-shores;genes	20	NA	ABCG1	NA	NA	NA	NA	0.465579710144928	0.434733224603914	0.596068796068796	0.263510101010101	0.852856147683734	0.647233893557423	0.755971551261406	0.597499495866102	0.273417314135231	0.0228896055743927	0.0349676429548689	0.0464171256488431	0.0917495682002279	0.0395266110730591	0.0419547523473654
498	NC_037328.1:142559172:142559275	NC_037328.1	142559172	142559275	chr1	chr1:142559172:142559275	NA	repeats;CpG-deserts;inter	104	NA	NA	NA	NA	NA	NA	0.29921470342523	0.460917519181586	0.39562358276644	0.458317997791682	0.699805194805195	0.604603850760435	0.925588235294118	0.7233357053905	0.334814795771328	0.00857533310806448	0.0422997797305613	0.0295152765930494	0.0594249513008008	0.0255563650239971	0.0265653292349358
499	NC_037328.1:142565148:142565213	NC_037328.1	142565148	142565213	chr1	chr1:142565148:142565213	NA	CpG-deserts;inter;downstream	66	NA	NA	NA	NA	NA	TFF3	0.223189533471224	0.392576160899142	0.268344807802639	0.42962962962963	0.726121486511979	0.705851063829787	0.551130129471143	0.493464475371909	0.290706755845546	0.00883741691362023	0.0339208919732753	0.029921658771554	0.0601081458818164	0.0248557073829656	0.0268837125452907
500	NC_037328.1:142565805:142565850	NC_037328.1	142565805	142565850	chr1	chr1:142565805:142565850	NA	transcripts;exons;3UTR;CpG-deserts;genes	46	NA	TFF3	NA	NA	TFF3	NA	0.335090984284533	0.248224728487886	0.576237161531279	0.608695652173913	0.820721896064362	0.850445557688406	0.868640350877193	0.737523237523237	0.377270628918897	0.018956956913701	0.0556493801848379	0.0412763084864025	0.0837320773548725	0.0377887239038751	0.0380621805295204
501	NC_037328.1:142565946:142565998	NC_037328.1	142565946	142565998	chr1	chr1:142565946:142565998	4	transcripts;exons;3UTR;CpG-deserts;genes	53	NA	TFF3	NA	NA	TFF3	NA	0.569250645994832	0.467135642135642	0.290193250421652	0.399090909090909	0.963096774193549	0.757080073408674	0.719509501797637	0.868199233716475	0.395553783868325	0.00271385834709398	0.0558359085280732	0.0204170481487748	0.0413889336626408	0.0185797843544691	0.0182440558825437
502	NC_037328.1:142567012:142567024	NC_037328.1	142567012	142567024	chr1	chr1:142567012:142567024	NA	transcripts;introns;repeats;CpG-deserts;genes	13	NA	TFF3	NA	NA	NA	NA	0.769798828622358	0.631502297631672	0.562527048170711	0.344741532976827	0.965913285680728	0.871355446355446	0.964224416053684	0.949731740232382	0.360663795230168	0.0232547847638336	0.0514996953452289	0.0461187200669254	0.0923948786263766	0.0411354853529746	0.0422690008403684
503	NC_037328.1:142567078:142567146	NC_037328.1	142567078	142567146	chr1	chr1:142567078:142567146	4	transcripts;introns;repeats;CpG-deserts;genes	69	NA	TFF3	NA	NA	NA	NA	0.0892156862745098	0.229310344827586	0.149206349206349	0.268803418803419	0.812440838404327	0.458108108108108	0.612820512820513	0.570454545454545	0.429322051418907	0.00466527478376969	0.0648073642455775	0.0245690931771986	0.0483509715822065	0.0224477987061407	0.0214004151076691
504	NC_037328.1:142572798:142572894	NC_037328.1	142572798	142572894	chr1	chr1:142572798:142572894	NA	CpG-deserts;inter	97	NA	NA	NA	NA	NA	NA	0.166666666666667	0.5	0.375	0	0.857142857142857	1	0.714285714285714	0.7	0.557440476190476	0.00781000772653491	0.118278845764496	0.0323634846887636	0.0574585312057833	0.0274043745912238	0.0256224923312388
505	NC_037328.1:142572862:142572955	NC_037328.1	142572862	142572955	chr1	chr1:142572862:142572955	8	CpG-deserts;inter	94	NA	NA	NA	NA	NA	NA	0.337662337662338	0.204759808161019	0.163035573349405	0.267516447368421	0.882299218194741	0.546375917586824	0.790306783000281	0.626388888888889	0.468099160282388	0.00403144359201375	0.075077813352593	0.0238220502818208	0.0464524473278902	0.0215095702982952	0.0205211855719192
506	NC_037328.1:142574480:142574577	NC_037328.1	142574480	142574577	chr1	chr1:142574480:142574577	NA	repeats;CpG-deserts;inter	98	NA	NA	NA	NA	NA	NA	0.0673076923076923	0.339912280701754	0.182679738562092	0.434365079365079	0.924444444444445	0.691919191919192	0.867132867132867	0.421127946127946	0.470089914671958	0.0173514130079962	0.0964588736109072	0.0432801989372965	0.0803254583316786	0.0400289544248226	0.0364176583892635
507	NC_037328.1:142608735:142608759	NC_037328.1	142608735	142608759	chr1	chr1:142608735:142608759	NA	CpG-shelves;repeats;inter	25	NA	NA	NA	NA	NA	NA	0.831689481689482	0.959673308606861	0.897273580130741	0.805470085470085	0.248785429016255	0.483619471044232	0.0227272727272727	0.463227142189274	-0.568936785230034	0.00963116657699087	0.114503340119418	0.0353485487446357	0.0620896841618423	0.0333489102256055	0.0278037415102854
508	NC_037328.1:142629958:142629976	NC_037328.1	142629958	142629976	chr1	chr1:142629958:142629976	3	CpG-deserts;inter	19	NA	NA	NA	NA	NA	NA	0.868831640058055	0.767592592592592	0.772326203208556	0.721161477411477	0.0764554594341828	0.265316325134455	0.207070707070707	0.189699597787833	-0.597842455960876	3.1415193990359e-05	0.106444829435425	0.012600649688457	0.0245176769377293	0.0113378469747453	0.0106516178758721
509	NC_037328.1:142653136:142653207	NC_037328.1	142653136	142653207	chr1	chr1:142653136:142653207	NA	CpG-deserts;inter	72	NA	NA	NA	NA	NA	NA	0.455555555555555	0.527222222222222	0.23062996031746	0.409062428799271	0.148148148148148	0.256736803248431	0.0430021367521368	0.0716230936819172	-0.275739996265969	0.0147383148171834	0.0324781599312633	0.0430604822956339	0.074278561435191	0.0303849256176402	0.0335575384467701
510	NC_037328.1:142670281:142670298	NC_037328.1	142670281	142670298	chr1	chr1:142670281:142670298	NA	transcripts;introns;repeats;CpG-deserts;genes	18	NA	TMPRSS3	NA	NA	NA	NA	0.604897959183674	0.602169312169312	0.420473108812092	0.74003885003885	0.85255079523901	0.670431712405713	0.856918198080989	0.848322635857938	0.215161027844931	0.0402078706457308	0.0241600551020228	0.0892809510494426	0.125302800978123	0.0464845591906322	0.0585745230244891
511	NC_037328.1:142672800:142672878	NC_037328.1	142672800	142672878	chr1	chr1:142672800:142672878	2	transcripts;introns;CpG-deserts;genes	79	NA	TMPRSS3	NA	NA	NA	NA	0.163372859025033	0.322586872586873	0.0756282598387862	0.0909090909090909	0.939047619047619	0.542679023684284	0.601587301587302	0.629166666666667	0.514995882156522	0.004303046836422	0.0947745211142555	0.0243823610136273	0.0472951572144685	0.021931769664989	0.0209083287711265
512	NC_037328.1:142673093:142673149	NC_037328.1	142673093	142673149	chr1	chr1:142673093:142673149	NA	transcripts;introns;CpG-deserts;genes	57	NA	TMPRSS3	NA	NA	NA	NA	0.619964349376114	0.344001476559616	0.261839857894377	0.356535947712418	0.897278911564626	0.593293293293293	0.931547619047619	0.802777777777778	0.410638992535198	0.00920996862185908	0.0684309538478828	0.0314192001326954	0.0610535209923835	0.0292169519275851	0.0273172191875068
513	NC_037328.1:142673806:142673901	NC_037328.1	142673806	142673901	chr1	chr1:142673806:142673901	10	transcripts;CDS;exons;introns;CpG-deserts;genes	96	NA	TMPRSS3	NA	NA	NA	NA	0.318142893034054	0.332218030290157	0.308678906018533	0.611654237219064	0.993908791334053	0.878708457729232	0.858431826837015	0.747571023081227	0.47698150810493	0.00248840514181666	0.0785416393179515	0.0204965764062585	0.0404607333695251	0.0186623239336894	0.0178335349913189
514	NC_037328.1:142674232:142674327	NC_037328.1	142674232	142674327	chr1	chr1:142674232:142674327	NA	transcripts;CDS;exons;CpG-deserts;genes	96	NA	TMPRSS3	NA	NA	NA	NA	0.528972194290822	0.571480204161368	0.120913125026446	0.396895313513212	0.977437396167426	0.703148463408014	0.933076742328687	0.689564155186773	0.421241480024763	0.017829071724058	0.0781213740925072	0.0417608703774373	0.0814058240713411	0.039804151148236	0.0369364592018792
515	NC_037328.1:142707614:142707663	NC_037328.1	142707614	142707663	chr1	chr1:142707614:142707663	6	transcripts;introns;CpG-deserts;genes	50	NA	UBASH3A	NA	NA	NA	NA	0.173972280949025	0.250663158231152	0.0816942719116632	0.111880802642868	0.85351920364436	0.495625485625486	0.832111997395161	0.692712660473854	0.563939708351038	0.00290369729589483	0.104896496870111	0.0231122784523375	0.0422634276845829	0.0202767722292349	0.0186270218679919
516	NC_037328.1:142708425:142708487	NC_037328.1	142708425	142708487	chr1	chr1:142708425:142708487	1	transcripts;introns;CpG-deserts;genes	63	NA	UBASH3A	NA	NA	NA	NA	0.313701411402561	0.584027084027084	0.247326363854843	0.514939185616076	0.997311827956989	0.903212104513937	0.788078149920255	0.784615384615385	0.4533058555265	0.0047626966524335	0.0741725446238635	0.025235890060559	0.0487305225683063	0.0228102071600395	0.0215774878603732
517	NC_037328.1:142715840:142715873	NC_037328.1	142715840	142715873	chr1	chr1:142715840:142715873	NA	transcripts;introns;repeats;CpG-deserts;genes	34	NA	UBASH3A	NA	NA	NA	NA	0.529761904761905	0.546412037037037	0.305796542638648	0.624556219794315	0.905952380952381	0.865692640692641	0.813301282051282	0.829246572000195	0.351916542866149	0.0107827042097194	0.0441504298378663	0.0336457304458095	0.0650959804967369	0.0284951794903707	0.0292190292593038
518	NC_037328.1:142717102:142717180	NC_037328.1	142717102	142717180	chr1	chr1:142717102:142717180	4	transcripts;introns;CpG-deserts;genes	79	NA	UBASH3A	NA	NA	NA	NA	0.542580409356725	0.536706349206349	0.669237147595356	0.563459801264679	0.949675859503693	0.940392156862745	1	0.872725512969415	0.362702455478186	0.00012661471249057	0.0404027387898692	0.0131929322292256	0.0256770431199249	0.0118831220690118	0.0112345720470932
519	NC_037328.1:142717347:142717390	NC_037328.1	142717347	142717390	chr1	chr1:142717347:142717390	NA	transcripts;introns;CpG-deserts;genes	44	NA	UBASH3A	NA	NA	NA	NA	0.424292615596963	0.736285936285936	0.492357991414595	0.504098360655738	1	0.805555555555555	0.727254901960784	0.928935489999541	0.326177760890662	0.0120399032675501	0.0447251515052553	0.0354161463979369	0.0680702353936802	0.0293666230243855	0.0306190092352676
520	NC_037328.1:142728741:142728785	NC_037328.1	142728741	142728785	chr1	chr1:142728741:142728785	NA	transcripts;CDS;exons;CpG-deserts;genes	45	NA	UBASH3A	NA	NA	NA	NA	0.662851738425509	0.568238020424195	0.746212121212121	0.755950482770839	0.988013080664095	0.937971861471861	0.764193270060397	1	0.239231462340922	0.0150841731019654	0.0247079153842043	0.042978399773378	0.0750155180463999	0.0287582905077987	0.0339062696550513
521	NC_037328.1:142737381:142737440	NC_037328.1	142737381	142737440	chr1	chr1:142737381:142737440	4	repeats;CpG-deserts;inter;downstream	60	NA	NA	NA	NA	NA	UBASH3A	0.751252293805485	0.891803037004275	0.993710691823899	0.708080808080808	0.0975364504776269	0.398809523809524	0.331359649122807	0.164835164835165	-0.588076510617336	0.000884570930019982	0.114635408574791	0.0169217405717095	0.0328006680485047	0.0158620552959117	0.0143712473764269
522	NC_037328.1:142738478:142738515	NC_037328.1	142738478	142738515	chr1	chr1:142738478:142738515	NA	CpG-deserts;inter;downstream	38	NA	NA	NA	NA	NA	UBASH3A	0.504010025062657	0.733082948125321	0.729343220338983	0.520808442851454	0.096984126984127	0.398866421568627	0.299509534057355	0.332323232323232	-0.339890330361269	0.00955896171474761	0.0471145292319343	0.0311542954554521	0.0619109879739067	0.0268726780360047	0.02771451720947
523	NC_037328.1:142742601:142742685	NC_037328.1	142742601	142742685	chr1	chr1:142742601:142742685	NA	CpG-deserts;inter	85	NA	NA	NA	NA	NA	NA	0.473359324236517	0.630496137849079	0.499748617395676	0.485454545454545	0.160058479532164	0.205710636745119	0.131734006734007	0.414141414141414	-0.294353521945778	0.0113743756585607	0.0340406192831565	0.0330166593866731	0.0664806395523619	0.0272619243921136	0.0298695255889739
524	NC_037328.1:142743036:142743093	NC_037328.1	142743036	142743093	chr1	chr1:142743036:142743093	5	CpG-deserts;inter	58	NA	NA	NA	NA	NA	NA	0.508870267460774	0.715272584035224	0.673476286838013	0.622732588883215	0.14312291645342	0.336924261157149	0.2018831872353	0.341030256815136	-0.374347776389055	0.00141220115563852	0.0476582555537598	0.0179884080963637	0.0357176451004117	0.0159987160462055	0.0156896997374472
525	NC_037328.1:142743461:142743489	NC_037328.1	142743461	142743489	chr1	chr1:142743461:142743489	3	CpG-deserts;inter	29	NA	NA	NA	NA	NA	NA	0.811827956989247	0.759845818669348	0.566962730755834	0.624151583710407	0.00427350427350427	0.175944700460829	0.138744879672299	0.22860801978449	-0.553804246483428	0.000352597532101111	0.0971598652561451	0.0147464988826349	0.0282530450090394	0.0132501750676844	0.0123871435894727
526	NC_037328.1:142750573:142750651	NC_037328.1	142750573	142750651	chr1	chr1:142750573:142750651	3	repeats;CpG-deserts;inter	79	NA	NA	NA	NA	NA	NA	0.867559523809524	0.834430935494765	0.909732100521574	0.783848227244454	0.522222222222222	0.499202551834131	0.28419452887538	0.41031746031746	-0.419908505955281	0.00157541722113061	0.0565817939342527	0.0182067625310976	0.0365600204643484	0.0163732084749958	0.0160504418672461
527	NC_037328.1:142752189:142752198	NC_037328.1	142752189	142752198	chr1	chr1:142752189:142752198	NA	CpG-deserts;inter	10	NA	NA	NA	NA	NA	NA	0.905902777777778	0.903106125970664	0.833429533429533	0.860372194854953	0.201900683645106	0.567541679610645	0.154381965552178	0.207539682539683	-0.592861655171329	0.0073261557169656	0.116633249360357	0.0315250499807144	0.0561651060384431	0.0270906582000337	0.0250145450234152
528	NC_037328.1:142825721:142825749	NC_037328.1	142825721	142825749	chr1	chr1:142825721:142825749	4	CpG-deserts;inter	29	NA	NA	NA	NA	NA	NA	0.428354519774011	0.384593118377004	0.321732026143791	0.587409200968523	0.925087469608017	0.70118230358505	1	0.868827374754136	0.443252070670968	0.00207876191603784	0.068555178099522	0.0198167287905553	0.0388128025775156	0.0180441780368006	0.0170804701494932
529	NC_037328.1:142826461:142826483	NC_037328.1	142826461	142826483	chr1	chr1:142826461:142826483	NA	CpG-deserts;inter	23	NA	NA	NA	NA	NA	NA	0.421305031446541	0.746587043908472	0.527805917621545	0.412751042061387	0.934987814505887	0.934080704241995	0.864681555004136	0.908122895622896	0.383355983584242	0.0138694144827162	0.052803945597072	0.0347832458938842	0.0723388382967365	0.0323765982516353	0.0326312573902647
530	NC_037328.1:142828576:142828647	NC_037328.1	142828576	142828647	chr1	chr1:142828576:142828647	8	CpG-deserts;inter	72	NA	NA	NA	NA	NA	NA	0.0996519820049232	0.37630107598595	0.293331891318156	0.4090498210559	0.766417563040005	0.734153263744341	0.793087366450297	0.70450628736343	0.454957427558286	0.00516805130258438	0.0680283854391926	0.0255678485642746	0.0499252150403544	0.0230739185136485	0.0221348397737525
531	NC_037328.1:142847817:142847827	NC_037328.1	142847817	142847827	chr1	chr1:142847817:142847827	0	CpG-deserts;inter	11	NA	NA	NA	NA	NA	NA	1	0.914475269632626	0.734868791002812	0.642110177404295	0.21435282179843	0.538064516129032	0.092027972027972	0.183006535947712	-0.566000598034147	0.00462133172830132	0.119200716287315	0.0252799419489564	0.0481815718226169	0.0247997266302265	0.0213215916333771
532	NC_037328.1:142847823:142847858	NC_037328.1	142847823	142847858	chr1	chr1:142847823:142847858	NA	CpG-deserts;inter	36	NA	NA	NA	NA	NA	NA	1	0.952380952380952	1	1	0.557422969187675	0.656410256410256	0.0833333333333333	0.5	-0.538803598362422	0.023029239302574	0.110486663013788	0.0506248942610839	0.0920208129747155	0.0466880945369081	0.0420870907083329
533	NC_037328.1:142865139:142865173	NC_037328.1	142865139	142865173	chr1	chr1:142865139:142865173	NA	CpG-deserts;inter	35	NA	NA	NA	NA	NA	NA	0.996124031007752	0.86833836098542	0.731981981981982	0.607894736842105	0.114461500974659	0.557879448075527	0.00595238095238095	0.438346883468835	-0.521924724336464	0.0193889329501053	0.119180681728084	0.0497707090087633	0.0845801040259687	0.0425601817328243	0.0384741321923651
534	NC_037328.1:142865276:142865306	NC_037328.1	142865276	142865306	chr1	chr1:142865276:142865306	6	CpG-deserts;inter	31	NA	NA	NA	NA	NA	NA	0.587132725430598	0.639296788482835	0.861619047619048	0.705561540855658	0.16625	0.381835748792271	0.0435735294117647	0.243609152271894	-0.489585417978052	0.00202449510751022	0.083173777071024	0.0196830221093064	0.0385737142139748	0.0179224637859821	0.0169697475041581
535	NC_037328.1:142865618:142865647	NC_037328.1	142865618	142865647	chr1	chr1:142865618:142865647	NA	CpG-deserts;inter	30	NA	NA	NA	NA	NA	NA	0.69382781301386	0.737701149425287	0.928587830080367	0.692945736434109	0.181377747281309	0.518376068376068	0.18766124871001	0.52684041223595	-0.409701763087571	0.0161034241464656	0.0696888715928716	0.0402703386306372	0.0773713751905464	0.0365676492840575	0.0350237127559275
536	NC_037328.1:142889510:142889570	NC_037328.1	142889510	142889570	chr1	chr1:142889510:142889570	NA	repeats;CpG-deserts;inter	61	NA	NA	NA	NA	NA	NA	0.694616977225673	0.865022908126356	0.730257936507936	0.795855379188713	0.399774774774775	0.469339622641509	0.114170551670552	0.558303624480095	-0.386041156870437	0.0210279127044668	0.0608172473665674	0.043865880261175	0.088005871550096	0.0430644668237638	0.040128737227173
537	NC_037328.1:142920780:142920857	NC_037328.1	142920780	142920857	chr1	chr1:142920780:142920857	5	repeats;CpG-deserts;inter	78	NA	NA	NA	NA	NA	NA	0.594499762920816	0.857473604826546	0.522340340659779	0.637097684923772	0.167782515991471	0.286598465473146	0.368888888888889	0.0636324786324786	-0.431127261086232	0.00473738247789103	0.0697238172155881	0.0247994605798821	0.048606861944668	0.0225805341665582	0.0215231084830661
538	NC_037328.1:142940865:142940919	NC_037328.1	142940865	142940919	chr1	chr1:142940865:142940919	NA	CpG-deserts;inter	55	NA	NA	NA	NA	NA	NA	0.418253968253968	0.399283559577677	0.162127814088598	0.400675150675151	0.810078347578348	0.429453262786596	0.739417989417989	0.696969696969697	0.323894701039309	0.0225700066148949	0.0482424383208566	0.0467770797015834	0.0910680124962645	0.0413396003104564	0.0416191473884855
539	NC_037328.1:142953706:142953741	NC_037328.1	142953706	142953741	chr1	chr1:142953706:142953741	NA	repeats;CpG-deserts;inter	36	NA	NA	NA	NA	NA	NA	0.80754052149401	0.886440978376462	0.839864290675052	0.503086419753086	0.100776674306086	0.571909571909572	0.0938165438165438	0.108477011494253	-0.540488102193039	0.0118108475457563	0.120184375485809	0.0387527456969194	0.0675567466795955	0.0325806367084599	0.0303746040883965
540	NC_037328.1:142970979:142971096	NC_037328.1	142970979	142971096	chr1	chr1:142970979:142971096	0	repeats;CpG-deserts;inter	118	NA	NA	NA	NA	NA	NA	0.920875420875421	0.997267759562842	0.955664640797881	0.911111111111111	0.233838383838384	0.472402597402597	0.402020202020202	0.25	-0.606664437271518	0.000903202818210094	0.11162857448856	0.0169625276541476	0.0329244909893139	0.0153099456115886	0.0144300375702372
541	NC_037328.1:142987457:142987479	NC_037328.1	142987457	142987479	chr1	chr1:142987457:142987479	NA	CpG-deserts;inter	23	NA	NA	NA	NA	NA	NA	0.518098350451292	0.719342251950947	0.323680823680824	0.558149058149058	1	0.801535087719298	0.936938616938617	0.861755233494364	0.370239613480039	0.0121359368015033	0.0537184526846583	0.0337162726540932	0.0683051974626624	0.029959114916945	0.0307241715271776
542	NC_037328.1:142987657:142987703	NC_037328.1	142987657	142987703	chr1	chr1:142987657:142987703	5	CpG-deserts;inter	47	NA	NA	NA	NA	NA	NA	0.442063492063492	0.336385836385836	0.316203703703704	0.378106725146199	0.888606083459025	0.703161750530172	0.916250880902044	0.846034585569469	0.47032338579037	0.000417151354265019	0.0683724169507679	0.0148723117539885	0.0289160934708534	0.0134822828917838	0.0126734482841256
543	NC_037328.1:142989066:142989145	NC_037328.1	142989066	142989145	chr1	chr1:142989066:142989145	3	CpG-deserts;inter	80	NA	NA	NA	NA	NA	NA	0.523015873015873	0.410802469135803	0.220017636684303	0.451072183630323	0.908926875593542	0.612443845462713	0.778240740740741	0.868125701459035	0.390707250197432	0.00547390485543248	0.0582066621190329	0.0252946044079154	0.0508499091519468	0.0228156562908707	0.0225532878333476
544	NC_037328.1:142999998:143000110	NC_037328.1	142999998	143000110	chr1	chr1:142999998:143000110	NA	CpG-deserts;inter	113	NA	NA	NA	NA	NA	NA	0.839433314317035	0.897233664152016	0.961169394073419	0.667724542724543	0.11728475778819	0.583573178672359	0.262713558705925	0.477261627261627	-0.481181948209728	0.011434712657737	0.091830242099107	0.0350804140183659	0.0666405542787819	0.0314877828595717	0.0299473537625368
545	NC_037328.1:143002768:143002813	NC_037328.1	143002768	143002813	chr1	chr1:143002768:143002813	NA	CpG-deserts;inter	46	NA	NA	NA	NA	NA	NA	0.348863636363636	0.790464933018125	0.595942265795207	0.673406451782591	0.0447845804988662	0.433574879227053	0.0741758241758242	0.135760073260073	-0.430095482449436	0.0158634100489962	0.0814549743854558	0.0397245454636669	0.0767971081989452	0.0372264735023376	0.0347452699835481
546	NC_037328.1:143003669:143003731	NC_037328.1	143003669	143003731	chr1	chr1:143003669:143003731	NA	CpG-deserts;inter	63	NA	NA	NA	NA	NA	NA	0.730541871921182	0.443372216330859	0.317716603882933	0.584312422470317	0.784257253302749	0.753630777824326	0.997222222222222	0.923015873015873	0.34554575293997	0.0216625111798669	0.0534034502533582	0.045398703514394	0.089302236820666	0.0404779361496351	0.0407590899959985
547	NC_037328.1:143003831:143003889	NC_037328.1	143003831	143003889	chr1	chr1:143003831:143003889	4	CpG-deserts;inter	59	NA	NA	NA	NA	NA	NA	0.682321665928223	0.500933232371539	0.465116747181965	0.664361001317523	0.982733391864208	0.803257628946752	1	0.802398299939283	0.318914168487748	0.00638515113991799	0.0394473996963797	0.0269275838273426	0.0535992863131966	0.0228808657485608	0.023825203451572
548	NC_037328.1:143007877:143007915	NC_037328.1	143007877	143007915	chr1	chr1:143007877:143007915	NA	CpG-deserts;inter	39	NA	NA	NA	NA	NA	NA	0.700700280112045	0.471136363636364	0.534116959064327	0.294736842105263	0.998245614035088	0.904471964224286	0.83035074899525	0.62741935483871	0.339949309293834	0.0255888547962915	0.0557176396060046	0.0475632531126606	0.0971251888312211	0.0444485406575455	0.0445695928480587
549	NC_037328.1:143028421:143028432	NC_037328.1	143028421	143028432	chr1	chr1:143028421:143028432	3	CpG-shelves;inter	12	NA	NA	NA	NA	NA	NA	0.805775683586778	0.815725806451613	0.793171654626763	0.746540496540497	0.364623438027693	0.427952602952603	0.146825396825397	0.303876678876679	-0.47948388113082	0.00291791789080331	0.0723108556624743	0.0216576999142415	0.0423123830885591	0.019771346420483	0.0186493514153671
550	NC_037328.1:143067506:143067565	NC_037328.1	143067506	143067565	chr1	chr1:143067506:143067565	5	repeats;CpG-deserts;inter	60	NA	NA	NA	NA	NA	NA	0.909949164851126	0.906721899053998	0.829684364167123	0.621031746031746	0.0915277777777778	0.55966049382716	0.203534229952472	0.313746630727763	-0.524729510454705	0.00656010735348364	0.103723763672085	0.0302277735484503	0.0540833828810607	0.0255888464935865	0.0240470940294682
551	NC_037328.1:143082699:143082804	NC_037328.1	143082699	143082804	chr1	chr1:143082699:143082804	2	CpG-deserts;inter	106	NA	NA	NA	NA	NA	NA	0.591011843333825	0.338675213675214	0.482646834477498	0.293560606060606	0.717204944178628	0.937121212121212	0.959492888064317	0.96010101010101	0.467006389229506	0.00217293392054915	0.0762237332328972	0.0198948473042222	0.0391807741584793	0.0179496094022589	0.0172484960928081
552	NC_037328.1:143092708:143092773	NC_037328.1	143092708	143092773	chr1	chr1:143092708:143092773	4	transcripts;introns;repeats;CpG-deserts;genes	66	NA	WDR4	NA	NA	NA	NA	0.518099109562524	0.584942084942085	0.756556002682763	0.679738562091503	0.20517094017094	0.373069778242192	0.0454545454545454	0.0470899470899471	-0.467137637080313	0.00368422960730123	0.0774936572227317	0.0231679399859922	0.0452806803209588	0.0209760852970664	0.0200048957137795
553	NC_037328.1:143115848:143115883	NC_037328.1	143115848	143115883	chr1	chr1:143115848:143115883	6	repeats;CpG-deserts;inter	36	NA	NA	NA	NA	NA	NA	0.493788668516889	0.661314821796068	0.68190289648623	0.75852432155658	0.00871143375680581	0.331327813970784	0.076867816091954	0.0451269492203119	-0.533374173828978	0.00147072646891205	0.0958180868867254	0.0186135405936038	0.0360740329554272	0.0166191646710885	0.0158438886272759
554	NC_037328.1:143132404:143132421	NC_037328.1	143132404	143132421	chr1	chr1:143132404:143132421	NA	CpG-deserts;inter;downstream	18	NA	NA	NA	NA	NA	NDUFV3	0.316283524904215	0.391143578643579	0.261757358531552	0.660765770960674	0.91536552892762	0.760558069381599	1	0.571581196581197	0.404388640462599	0.0204587463610063	0.0753583764441034	0.0454898846680757	0.0868011747462895	0.0427285668204146	0.0395551061922954
555	NC_037328.1:143134670:143134708	NC_037328.1	143134670	143134708	chr1	chr1:143134670:143134708	NA	repeats;CpG-deserts;inter	39	NA	NA	NA	NA	NA	NA	0.552139037433155	0.632834757834758	0.464392701525054	0.627642472470059	0.855614823760959	0.834074074074074	0.948529411764706	0.676242804814233	0.259363036287737	0.0115478032380591	0.0273763505007626	0.0349213956968698	0.0669449710782467	0.0272771415257718	0.0300882144343055
556	NC_037328.1:143141257:143141351	NC_037328.1	143141257	143141351	chr1	chr1:143141257:143141351	NA	CpG-deserts;inter	95	NA	NA	NA	NA	NA	NA	0.254504903698452	0.322170731707317	0.0645549242424242	0.531117021276596	0.728329168349029	0.667978959025471	0.799565217391304	0.749410274331644	0.443234009543165	0.0155833937977511	0.0732911543984368	0.0399316592217438	0.0761295841106582	0.0359647762884782	0.0344252836373023
557	NC_037328.1:143164818:143164876	NC_037328.1	143164818	143164876	chr1	chr1:143164818:143164876	5	transcripts;first intron;CpG-shelves;genes	59	NA	PKNOX1	NA	NA	NA	NA	0.565897435897436	0.321997981415678	0.206958701675683	0.516522301228184	0.986803000408824	0.702158135981665	0.912087560778755	0.800758362829802	0.447607659945516	0.0062285547929787	0.0759960868254079	0.0272654404445536	0.0530719061442583	0.0249927621142344	0.023576485691106
558	NC_037328.1:143206590:143206662	NC_037328.1	143206590	143206662	chr1	chr1:143206590:143206662	NA	CpG-deserts;inter	73	NA	NA	NA	NA	NA	NA	0.472065527065527	0.685576339737108	0.344603174603175	0.518759493670886	0.783773987206823	0.889923430850375	0.657915921288014	0.8842555105713	0.298716078709954	0.0168461925586466	0.0390921038033596	0.0400389102645605	0.0790551635808949	0.0333361334998332	0.0358156516465471
559	NC_037328.1:143211456:143211518	NC_037328.1	143211456	143211518	chr1	chr1:143211456:143211518	4	CpG-deserts;inter	63	NA	NA	NA	NA	NA	NA	0.558465608465608	0.495912300260126	0.559097329224448	0.682013685239492	0.929625785619558	0.71171310629515	0.805701754385965	0.907142857142857	0.264673645063464	0.00670487042917272	0.026928378143225	0.0298444371623882	0.0545007555861554	0.0218554818226454	0.0242334826927157
560	NC_037328.1:143325065:143325106	NC_037328.1	143325065	143325106	chr1	chr1:143325065:143325106	3	CpG-deserts;inter	42	NA	NA	NA	NA	NA	NA	0.434343434343434	0.619927977277338	0.461315711315711	0.509546009546009	0.0225430597771023	0.273412698412698	0.0920966420966421	0.244408369408369	-0.34816809069692	0.0042834076815995	0.0437205006325594	0.0240843104103407	0.0472483598097652	0.0203059108792254	0.0208878081977001
561	NC_037328.1:143325302:143325380	NC_037328.1	143325302	143325380	chr1	chr1:143325302:143325380	NA	CpG-deserts;inter	79	NA	NA	NA	NA	NA	NA	0.522007562330143	0.541366865992368	0.3913395740554	0.718128671886525	0.0254468925758801	0.358794259315345	0	0.145368195762835	-0.410808331652594	0.00878623658838919	0.0674331915977085	0.0308613051651956	0.0599553626870788	0.0284853064740029	0.0268124939579842
562	NC_037328.1:143335264:143335300	NC_037328.1	143335264	143335300	chr1	chr1:143335264:143335300	NA	CpG-deserts;inter	37	NA	NA	NA	NA	NA	NA	0.367120181405896	0.581501831501832	0.461025742054111	0.25024154589372	0.827571211132855	0.573417097807342	0.730635624538064	0.817693744164332	0.322357094196759	0.0132076510544146	0.0440887578681577	0.0369148841997464	0.0708745018854441	0.0300037215838747	0.0319257181510578
563	NC_037328.1:143345369:143345396	NC_037328.1	143345369	143345396	chr1	chr1:143345369:143345396	0	CpG-deserts;inter	28	NA	NA	NA	NA	NA	NA	0.434108527131783	0.524572649572649	0.459978070175439	0.524475524475524	0.810392465000668	0.676242645567052	0.808084772370487	0.828543796628903	0.295032227052929	0.000787116901006005	0.0278939723097615	0.0168175113020758	0.0323441529889187	0.0140207883949062	0.0141759505280478
564	NC_037328.1:143381141:143381205	NC_037328.1	143381141	143381205	chr1	chr1:143381141:143381205	NA	CpG-deserts;inter	65	NA	NA	NA	NA	NA	NA	0.44707264957265	0.470756648137884	0.399680391881597	0.450590762620838	0.776325757575758	0.518115942028986	0.878913220400289	0.761195229452943	0.291612424311252	0.0292668671185291	0.0347041898853931	0.0524859076246136	0.104484102621167	0.0450260378333719	0.0481968748390118
565	NC_037328.1:143390456:143390484	NC_037328.1	143390456	143390484	chr1	chr1:143390456:143390484	4	CpG-shores;inter	29	NA	NA	NA	NA	NA	NA	0.416021581046212	0.307134502923977	0.149816505549588	0.332407407407407	0.654269134586604	0.689678538515748	0.645152179691653	0.461943707633363	0.311415890875046	0.0063049232375339	0.0375005693878083	0.0268255260340172	0.0533511603061444	0.0234520004986068	0.0237091501210541
566	NC_037328.1:143403158:143403165	NC_037328.1	143403158	143403165	chr1	chr1:143403158:143403165	5	CpG-deserts;inter	8	NA	NA	NA	NA	NA	NA	0.552063789868668	0.900793650793651	0.836821705426357	0.738925802879291	0.120673076923077	0.395023041474654	0.0616402116402116	0.177451533973273	-0.568454271239188	0.00166998385950495	0.111303092636495	0.0198853807370921	0.0369951204984553	0.0171627105631403	0.0162507155686563
567	NC_037328.1:143408315:143408351	NC_037328.1	143408315	143408351	chr1	chr1:143408315:143408351	1	repeats;CpG-deserts;inter	37	NA	NA	NA	NA	NA	NA	0.373787878787879	0.36984126984127	0.275829533941236	0.352458592132505	0.978167010106957	0.686050724637681	0.773076923076923	0.660939754689755	0.431579284452106	0.00636237416482632	0.0629989293702454	0.0271785118450392	0.0535041383278087	0.0249512014426555	0.0237820283868039
568	NC_037328.1:143411711:143411797	NC_037328.1	143411711	143411797	chr1	chr1:143411711:143411797	1	CpG-deserts;inter	87	NA	NA	NA	NA	NA	NA	0.611503322259136	0.527433140336366	0.552411873840445	0.580994152046784	0.92537901442011	0.81347072879331	0.849842555105713	0.942577030812325	0.314731710162182	0.000352117576597906	0.0304773031362671	0.0150418441043399	0.0282530450090394	0.0127035430819998	0.0123871435894727
569	NC_037328.1:143421689:143421720	NC_037328.1	143421689	143421720	chr1	chr1:143421689:143421720	1	CpG-deserts;inter	32	NA	NA	NA	NA	NA	NA	0.341077158135982	0.537800952317081	0.437022568638591	0.628255578093306	0.872870958828406	0.788975779967159	0.864825227963526	0.727739130434783	0.327563710002229	0.00680676511959665	0.039290411542483	0.027438765546547	0.0548385598901012	0.0240208944406615	0.024390860213662
570	NC_037328.1:143462266:143462279	NC_037328.1	143462266	143462279	chr1	chr1:143462266:143462279	5	CpG-deserts;inter	14	NA	NA	NA	NA	NA	NA	0.507083333333333	0.607855107855108	0.436150680595125	0.536642743221691	0.900025149775898	0.784815145207652	0.766636418632789	0.813398692810457	0.294285885355385	0.000803479594125921	0.0284089325812822	0.0169282817760287	0.032408543335586	0.0140370913365678	0.0142052203298836
571	NC_037328.1:143470416:143470449	NC_037328.1	143470416	143470449	chr1	chr1:143470416:143470449	4	CpG-deserts;inter	34	NA	NA	NA	NA	NA	NA	0.766397917191568	0.735938792390405	0.748785494482568	0.552139037433155	0.196064814814815	0.210333752269236	0.144097222222222	0.154807084123972	-0.524489592016863	0.000932195936816339	0.083309582879268	0.0167950545089294	0.0329779197477079	0.0152252315988479	0.0144635370363243
572	NC_037328.1:143497461:143497486	NC_037328.1	143497461	143497486	chr1	chr1:143497461:143497486	2	CpG-deserts;inter	26	NA	NA	NA	NA	NA	NA	0.567704067704068	0.69726867335563	0.637452107279693	0.549074074074074	0.0807837995337995	0.259263565891473	0.130808080808081	0.21606578115117	-0.441144423757235	0.000185373316111574	0.0603753863284675	0.0136649043144711	0.0267621483723103	0.0124311319257723	0.0117565692851602
573	NC_037328.1:143518971:143519015	NC_037328.1	143518971	143519015	chr1	chr1:143518971:143519015	NA	CpG-shores;inter	45	NA	NA	NA	NA	NA	NA	0.67295656796801	0.535931498079385	0.455812807881773	0.580501826177698	0.9218955939219	0.627403278225457	0.876775271512114	0.846196202810449	0.256766911590764	0.0212144574344363	0.029690920939081	0.0520363203633483	0.0884159067964119	0.0356080020599609	0.0403356939387914
574	NC_037328.1:143538861:143538895	NC_037328.1	143538861	143538895	chr1	chr1:143538861:143538895	NA	CpG-deserts;inter	35	NA	NA	NA	NA	NA	NA	0.493051328869953	0.320645479182065	0.3273115280595	0.347963800904977	0.792550433634993	0.562111801242236	0.552413570144067	0.726810545776063	0.286228553445216	0.00975337858629722	0.0324142434893261	0.0334099165715158	0.0623869001402675	0.0257054529724992	0.0279439805291929
575	NC_037328.1:143539657:143539714	NC_037328.1	143539657	143539714	chr1	chr1:143539657:143539714	8	CpG-deserts;inter	58	NA	NA	NA	NA	NA	NA	0.563394357526384	0.211271997282669	0.157418219907613	0.341794257142461	0.883932146776635	0.907977204499761	0.791604836872239	0.955822782290174	0.56636453464492	0.00475367860464887	0.10768087529533	0.0251760170266675	0.0486885637130858	0.0228109247327385	0.0215597527373718
576	NC_037328.1:143571057:143571141	NC_037328.1	143571057	143571141	chr1	chr1:143571057:143571141	13	CpG-deserts;inter	85	NA	NA	NA	NA	NA	NA	0.311633106129318	0.54466128572508	0.203405444920483	0.332063931606116	0.861026781495051	0.714289867958789	0.822375510583058	0.784862942555351	0.447697833552813	0.00418893699462152	0.0676786642794959	0.0235880085747949	0.0468820163023735	0.0220140028378551	0.0207211801352196
577	NC_037328.1:143582034:143582115	NC_037328.1	143582034	143582115	chr1	chr1:143582034:143582115	4	CpG-deserts;inter	82	NA	NA	NA	NA	NA	NA	0.450396825396825	0.410018214936248	0.0664488017429194	0.374468085106383	0.777403156384505	0.688319088319088	0.898801575072762	0.836235489220564	0.474856845453636	0.00642796191884841	0.0810405341784716	0.027247766705605	0.053705322594362	0.0250399252462118	0.0238735866964639
578	NC_037328.1:143624312:143624360	NC_037328.1	143624312	143624360	chr1	chr1:143624312:143624360	NA	CpG-deserts;inter	49	NA	NA	NA	NA	NA	NA	0.260429572369002	0.0652488213724463	0.450895846995138	0.448780444478141	0.557304745063366	0.525511873347825	0.779811612805799	0.763403724494342	0.350169317624151	0.0243470098991345	0.0571838923912271	0.0469798278675847	0.0946432430696189	0.0428645507159373	0.0433574651823881
579	NC_037328.1:143663661:143663735	NC_037328.1	143663661	143663735	chr1	chr1:143663661:143663735	NA	transcripts;introns;repeats;CpG-deserts;genes	75	NA	HSF2BP	NA	NA	NA	NA	0.482181660147762	0.30974025974026	0.313829787234043	0.352380952380952	0.83012246578162	0.527777777777778	0.949275362318841	0.852380952380952	0.425355974689044	0.0120797188150875	0.0687210901803215	0.0343325173205128	0.0681677064024041	0.0322225980937624	0.03066365025858
580	NC_037328.1:143663866:143663873	NC_037328.1	143663866	143663873	chr1	chr1:143663866:143663873	NA	transcripts;introns;repeats;CpG-deserts;genes	8	NA	HSF2BP	NA	NA	NA	NA	0.266995575938665	0.493778363343581	0.368659118659119	0.313492063492063	0.965913285680728	0.558649698015531	0.839258750857927	0.676346037507562	0.39931066265708	0.0129975645977246	0.0634146381068455	0.0358290642833427	0.070419985644033	0.0319332056268145	0.0317143461281049
581	NC_037328.1:143671458:143671520	NC_037328.1	143671458	143671520	chr1	chr1:143671458:143671520	NA	transcripts;introns;CpG-deserts;genes	63	NA	HSF2BP	NA	NA	NA	NA	0.587546343107516	0.299659863945578	0.539346405228758	0.300980392156863	0.98625140291807	0.654022988505747	0.795089786756453	0.700757575757576	0.352147187374783	0.0161039932953353	0.0547521611154308	0.0378029723019743	0.0773713751905464	0.0339069957735672	0.0350237127559275
582	NC_037328.1:143686922:143687022	NC_037328.1	143686922	143687022	chr1	chr1:143686922:143687022	NA	transcripts;introns;CpG-deserts;genes	101	NA	HSF2BP	NA	NA	NA	NA	0.340636394908841	0.319388452749521	0.161045161670944	0.114877967944006	0.511822361002689	0.723377549377982	0.778052121895039	0.4717669819175	0.387267759229974	0.0076160863142758	0.0582091617277475	0.0283715249135222	0.0569083361864258	0.0259790315959622	0.0253626304714699
583	NC_037328.1:143701678:143701762	NC_037328.1	143701678	143701762	chr1	chr1:143701678:143701762	NA	transcripts;introns;repeats;CpG-deserts;genes	85	NA	HSF2BP	NA	NA	NA	NA	0.759583333333333	0.420047846889952	0.562732447817837	0.519217286914766	0.80287962037962	0.797638365691104	0.967117794486215	0.693095238095238	0.249787525924072	0.0353226045911997	0.0320301115756521	0.0708988714932714	0.116248633910771	0.0465837351067444	0.0540308224425995
584	NC_037328.1:143708225:143708334	NC_037328.1	143708225	143708334	chr1	chr1:143708225:143708334	4	transcripts;introns;CpG-deserts;genes	110	NA	HSF2BP	NA	NA	NA	NA	0.47095092804475	0.286639344262295	0.535449735449735	0.166666666666667	0.76591369694818	0.667548500881834	0.959109730848861	0.803030303030303	0.433973889321433	0.00726427591781437	0.0723496280618441	0.0289375527125164	0.05601385236377	0.0261670083092613	0.0249406309508818
585	NC_037328.1:143710467:143710554	NC_037328.1	143710467	143710554	chr1	chr1:143710467:143710554	NA	transcripts;introns;CpG-deserts;genes	88	NA	HSF2BP	NA	NA	NA	NA	0.284429824561403	0.534150943396226	0.163836477987421	0.0632754342431762	0.856227106227106	0.436184210526316	0.92991452991453	0.811901340996169	0.497133626868974	0.0162003299535632	0.1090931149893	0.0410431081886991	0.0776200727959748	0.0386295322519313	0.0351379793744814
586	NC_037328.1:143724696:143724723	NC_037328.1	143724696	143724723	chr1	chr1:143724696:143724723	NA	transcripts;introns;CpG-shelves;repeats;genes	28	NA	HSF2BP	NA	NA	NA	NA	0.556900452488688	0.581527100871363	0.551451327433628	0.451572434019648	0.0141151685393258	0.360896213965219	0.191071428571429	0.146321979906886	-0.357261630957617	0.0101480103976502	0.0466614295012066	0.0320319484287966	0.0634243416200863	0.0278462407759865	0.0284407622171202
587	NC_037328.1:143726294:143726347	NC_037328.1	143726294	143726347	chr1	chr1:143726294:143726347	NA	transcripts;introns;CpG-shores;genes	54	NA	HSF2BP	NA	NA	NA	NA	0.990367965367965	0.970802610265697	0.976533882783883	0.984027464644394	0.414128648256692	0.73509647242726	0.496323749625636	0.495306020733652	-0.445219258004675	0.00752722817262563	0.0649113871720483	0.0288039016391279	0.0566701831929788	0.0262808643537111	0.0252519235638583
588	NC_037328.1:143740302:143740320	NC_037328.1	143740302	143740320	chr1	chr1:143740302:143740320	NA	CpG-deserts;inter	19	NA	NA	NA	NA	NA	NA	0.365300988319856	0.233035776484052	0.451017540125381	0.50704811517875	0.870988281514597	0.527004517221909	0.920651629072682	0.82725087467593	0.39737322059427	0.0125028201222786	0.0646589133260407	0.0359224293084668	0.0692047925526679	0.0327478061793045	0.0311420420297477
589	NC_037328.1:143742000:143742046	NC_037328.1	143742000	143742046	chr1	chr1:143742000:143742046	NA	CpG-deserts;inter	47	NA	NA	NA	NA	NA	NA	0.666666666666667	0.5	0.4	0.333333333333333	1	0.857142857142857	1	0.666666666666667	0.405952380952381	0.00922879195586395	0.0667828798185941	0.0315250863012045	0.0610855962584058	0.0290817907236832	0.0273300274444143
590	NC_037328.1:143759905:143759949	NC_037328.1	143759905	143759949	chr1	chr1:143759905:143759949	6	CpG-deserts;inter	45	NA	NA	NA	NA	NA	NA	0.714375461936438	0.584217171717172	0.869714349977508	0.457473987365292	0.0661630036630037	0.261666666666667	0.116635338345865	0.245076179858789	-0.484059945615521	0.0058963405422102	0.0842743571311078	0.0267110887214998	0.0521391378676238	0.0245301206440085	0.0231401433880643
591	NC_037328.1:143785390:143785460	NC_037328.1	143785390	143785460	chr1	chr1:143785390:143785460	4	transcripts;first intron;CpG-shelves;repeats;genes	71	NA	PDXK	NA	NA	NA	NA	0.447854737854738	0.382685599893715	0.341459214129524	0.500580720092915	0.890978715935687	0.862582465026605	0.98133277362749	0.871148999208269	0.48336567045679	5.32777357981664e-05	0.0701458377875711	0.0126668576519738	0.0245709943955475	0.0113407631693268	0.0107220079341359
592	NC_037328.1:143786318:143786355	NC_037328.1	143786318	143786355	chr1	chr1:143786318:143786355	4	transcripts;first intron;CpG-shelves;genes	38	NA	PDXK	NA	NA	NA	NA	0.316544566544567	0.437538651824366	0.362539682539682	0.398866421568627	0.931933198380567	0.870913394597605	0.921339807852966	0.724839743589743	0.48338420548591	0.000441952513753765	0.0718025104344875	0.0150530479745597	0.0292656882357365	0.0134685358546674	0.0128259922597394
593	NC_037328.1:143786592:143786602	NC_037328.1	143786592	143786602	chr1	chr1:143786592:143786602	NA	transcripts;first intron;CpG-shelves;genes	11	NA	PDXK	NA	NA	NA	NA	0.564484126984127	0.825040849673203	0.508455882352941	0.574874278264109	0.997652582159624	0.886361756336444	0.84299732381802	0.824415784832452	0.26964307746804	0.0225428392822773	0.0318712404666705	0.053675005210507	0.0910122702572637	0.0367019900778457	0.0415907379718021
594	NC_037328.1:143788547:143788643	NC_037328.1	143788547	143788643	chr1	chr1:143788547:143788643	4	transcripts;first intron;CpG-deserts;genes	97	NA	PDXK	NA	NA	NA	NA	0.4	0.428571428571429	0.2	0.5	1	0.75	1	0.777777777777778	0.499801587301587	0.00180679818254973	0.0864683327034517	0.0196933366283611	0.0375673460980122	0.0173229199107783	0.0165021251330936
595	NC_037328.1:143788772:143788840	NC_037328.1	143788772	143788840	chr1	chr1:143788772:143788840	10	transcripts;first intron;CpG-deserts;genes	69	NA	PDXK	NA	NA	NA	NA	0.336353750373701	0.329992978237185	0.134733338137188	0.344754444382939	0.779999823678176	0.766453225182919	0.765259500926594	0.834082621041555	0.499990164924558	0.00115288922306572	0.0762776340473781	0.0173886460618451	0.0342928959449022	0.0156733344181869	0.0150583149128801
596	NC_037328.1:143789053:143789095	NC_037328.1	143789053	143789095	chr1	chr1:143789053:143789095	NA	transcripts;first intron;CpG-deserts;genes	43	NA	PDXK	NA	NA	NA	NA	0.308080808080808	0.403855561670641	0.439907538697861	0.648824786324786	0.986496913580247	0.586805555555556	1	0.77625313283208	0.387221726798447	0.0213017854502686	0.0681414147677939	0.0449182111575447	0.088570298055589	0.0436892730842723	0.0404107611541572
597	NC_037328.1:143791433:143791487	NC_037328.1	143791433	143791487	chr1	chr1:143791433:143791487	2	transcripts;first intron;CpG-deserts;genes	55	NA	PDXK	NA	NA	NA	NA	0.266261650319621	0.289766970618034	0.266025641025641	0.5	0.939502824411361	0.738846153846154	0.876500193573364	0.774509803921569	0.501826178447288	0.000562227816274864	0.0811216269586396	0.0154908713446178	0.0302953761710223	0.0140370913365678	0.0132736512063409
598	NC_037328.1:143796197:143796252	NC_037328.1	143796197	143796252	chr1	chr1:143796197:143796252	5	transcripts;introns;repeats;CpG-deserts;genes	56	NA	PDXK	NA	NA	NA	NA	0.2310543862268	0.561904761904762	0.177539682539683	0.297120708748616	0.835986988529361	0.910049627791563	0.98780487804878	0.650106837606838	0.52908219813917	0.00344472547210607	0.101392947849662	0.0233379796132205	0.0444440591514884	0.0212769746066244	0.0196266687377149
599	NC_037328.1:143796707:143796794	NC_037328.1	143796707	143796794	chr1	chr1:143796707:143796794	7	transcripts;introns;repeats;CpG-deserts;genes	88	NA	PDXK	NA	NA	NA	NA	0.269337770950674	0.505714104067129	0.310541506490237	0.412962962962963	0.953106431405724	0.664302674877691	0.733020278674549	0.717672687843466	0.392386432082607	0.00351430758006407	0.0557929453858592	0.0220214850285303	0.0446817578898048	0.0200155318560743	0.0197329986569371
600	NC_037328.1:143797295:143797351	NC_037328.1	143797295	143797351	chr1	chr1:143797295:143797351	7	transcripts;introns;CpG-deserts;genes	57	NA	PDXK	NA	NA	NA	NA	0.325195000123028	0.2743961352657	0.157992193598751	0.13870082815735	0.998529411764706	0.608595352673314	0.661974789915966	0.832399547255235	0.551303736116098	0.00369488705494775	0.10371564647663	0.023353068629668	0.0453162103555274	0.0217549667886809	0.0200214113885843
601	NC_037328.1:143799044:143799103	NC_037328.1	143799044	143799103	chr1	chr1:143799044:143799103	NA	transcripts;introns;CpG-deserts;genes	60	NA	PDXK	NA	NA	NA	NA	0.566884531590414	0.658285440613027	0.433806146572104	0.375358680057389	0.851230147475893	0.709090909090909	0.802564102564102	0.753589196872779	0.270534889292687	0.0164707426488684	0.0295476905684614	0.0445209613197862	0.0781878733102198	0.0317685477685975	0.0354060181568027
602	NC_037328.1:143803781:143803790	NC_037328.1	143803781	143803790	chr1	chr1:143803781:143803790	NA	transcripts;introns;repeats;CpG-deserts;genes	10	NA	PDXK	NA	NA	NA	NA	0.561155223215815	0.39237735444632	0.469546415057251	0.557371794871795	0.911440113276695	0.734408602150538	0.892690058479532	0.601731601731602	0.289954897011797	0.0196416334856708	0.0359035297894637	0.0425122870632746	0.0851243118421202	0.0364621603627003	0.0387358269407271
603	NC_037328.1:143807163:143807224	NC_037328.1	143807163	143807224	chr1	chr1:143807163:143807224	NA	transcripts;introns;CpG-shores;genes	62	NA	PDXK	NA	NA	NA	NA	0.429695095553219	0.451847753185781	0.286936592818946	0.410385770750988	0.874535498916361	0.617532467532467	0.505263157894737	0.74054532322138	0.289752808814003	0.027345642284997	0.037161136909438	0.0510351056986296	0.100625251144183	0.04253807429724	0.0462852081554453
604	NC_037328.1:143807310:143807378	NC_037328.1	143807310	143807378	chr1	chr1:143807310:143807378	2	transcripts;introns;CpG-shores;repeats;genes	69	NA	PDXK	NA	NA	NA	NA	0.384325396825397	0.21034255599473	0.293078444297956	0.625094108789761	0.811145617667357	0.665231259968102	0.948148148148148	0.984375	0.474014879968941	0.00688872002311024	0.0870164688518334	0.028522895685923	0.0550737629492089	0.0260190452111711	0.0245056082401285
605	NC_037328.1:143809903:143809921	NC_037328.1	143809903	143809921	chr1	chr1:143809903:143809921	NA	CpG-shores;inter;downstream	19	NA	NA	NA	NA	NA	PDXK	0.367708333333333	0.104166666666667	0.455050505050505	0.363330200501253	0.772626728110599	0.523614699971289	0.764066193853428	0.849540043290043	0.4048979899184	0.00798502644704996	0.0652387453854835	0.0295388081838176	0.0578550768491101	0.0268768900077721	0.0258116713369333
606	NC_037328.1:143810127:143810221	NC_037328.1	143810127	143810221	chr1	chr1:143810127:143810221	3	CpG-shores;inter;downstream	95	NA	NA	NA	NA	NA	PDXK	0.398316798941799	0.44895110228827	0.435595278220516	0.650017566058112	0.99288387753504	0.751771094402673	0.709157509157509	0.924181002431002	0.361278184504382	0.00689638243497788	0.0506856261822957	0.0277087856878387	0.0550858948250871	0.0245903706199808	0.0245112807337372
607	NC_037328.1:143810508:143810581	NC_037328.1	143810508	143810581	chr1	chr1:143810508:143810581	6	CpG-shores;inter	74	NA	NA	NA	NA	NA	NA	0.479543496985357	0.499987452161365	0.373924268502582	0.49040404040404	0.803238232815698	0.783649625177281	0.953846153846154	0.738271441786705	0.358786548893124	0.00123966440584447	0.0419946633044111	0.0177271667740318	0.0347826710973367	0.0153392287818944	0.0152711843517245
608	NC_037328.1:143810709:143810740	NC_037328.1	143810709	143810740	chr1	chr1:143810709:143810740	4	CpG-shelves;inter	32	NA	NA	NA	NA	NA	NA	0.33008658008658	0.114573831965136	0.276806526806527	0.425	0.94608760034292	0.674306734578381	0.683415032679739	0.931547619047619	0.522222511947604	0.00203191966475536	0.0948417065150504	0.0198948473042222	0.0386081414475656	0.018094432884474	0.0169859075789021
609	NC_037328.1:143811188:143811233	NC_037328.1	143811188	143811233	chr1	chr1:143811188:143811233	NA	CpG-shelves;inter	46	NA	NA	NA	NA	NA	NA	0.472463768115942	0.594613740232935	0.429953231292517	0.558856416383298	0.868314280770059	0.599098956212358	0.776040304906992	0.695994951242328	0.220890334276761	0.0223518020494535	0.0220474690057211	0.0529734014947375	0.0906399135956369	0.0343172220734491	0.0414111665451728
610	NC_037328.1:143812923:143812981	NC_037328.1	143812923	143812981	chr1	chr1:143812923:143812981	5	CpG-deserts;inter	59	NA	NA	NA	NA	NA	NA	0.395833333333333	0.355615086958371	0.176282051282051	0.444598174860171	0.86164681414256	0.719727235156358	0.65636277302944	0.832325268817204	0.424433361177909	0.00155345810340458	0.0612935073793218	0.0184863524544699	0.0364902792043751	0.0162982176947756	0.0160233520235888
611	NC_037328.1:143823307:143823355	NC_037328.1	143823307	143823355	chr1	chr1:143823307:143823355	7	transcripts;first intron;CpG-deserts;genes	49	NA	CSTB	NA	NA	NA	NA	0.46929143126177	0.325840336134454	0.164800271841728	0.332952921395544	0.685240306767024	0.577965674986952	0.92190847127556	0.853289508532176	0.436379750232054	0.0053556687530626	0.0715759996990735	0.0260394615184798	0.0504958253064123	0.0237370653911244	0.0223907133426321
612	NC_037328.1:143823850:143823865	NC_037328.1	143823850	143823865	chr1	chr1:143823850:143823865	0	promoters;CpG-deserts;inter	16	CSTB	NA	NA	NA	NA	NA	0.516126552108561	0.360885491320274	0.317798041202296	0.367012266179704	0.627311259031689	0.756313131313131	0.819485858859673	0.740064102564102	0.34533800023944	0.00111787511004904	0.0400321514219235	0.0170361683190398	0.0341111280742902	0.0151554210470739	0.0149718971029559
613	NC_037328.1:143849000:143849044	NC_037328.1	143849000	143849044	chr1	chr1:143849000:143849044	NA	transcripts;first intron;CpG-shores;repeats;genes	45	NA	CSTB	NA	NA	NA	NA	0.539016897081413	0.470163083765752	0.372139303482587	0.637545787545788	0.76258272378962	0.833231096388991	0.896744959244959	0.685970726318696	0.289916108466681	0.0075625314227839	0.0329206947953353	0.0317060905228477	0.0567315153229167	0.0236013069307292	0.0252817636138125
614	NC_037328.1:143877938:143878010	NC_037328.1	143877938	143878010	chr1	chr1:143877938:143878010	3	CpG-deserts;inter	73	NA	NA	NA	NA	NA	NA	0.405372405372405	0.0441176470588235	0.305555555555556	0.277083333333333	0.783333333333333	0.520612874779541	0.804166666666667	0.750214159737969	0.456549523299348	0.00419363953767768	0.0769443931737867	0.0237955429535042	0.0469003233453878	0.0216291334102324	0.0207312033574439
615	NC_037328.1:143881261:143881309	NC_037328.1	143881261	143881309	chr1	chr1:143881261:143881309	NA	CpG-deserts;inter	49	NA	NA	NA	NA	NA	NA	0.198021181716834	0.0506172839506173	0.0436936936936937	0.376190476190476	0.775468358801692	0.389045530492899	0.650193798449612	0.448660714285714	0.398711441619574	0.0157444847126872	0.0696372559202155	0.0386333277872965	0.076501962996828	0.0365966678811266	0.0346058250754397
616	NC_037328.1:143940863:143940926	NC_037328.1	143940863	143940926	chr1	chr1:143940863:143940926	3	CpG-shores;inter	64	NA	NA	NA	NA	NA	NA	0.343803418803419	0.617701640646956	0.494975845410628	0.620580808080808	0.876392779333956	0.827812284334023	0.96677559912854	0.857638888888889	0.362889459685899	0.00635659595825299	0.0464938477187004	0.0275528428827246	0.0534937933643837	0.0239956989839718	0.023777779086074
617	NC_037328.1:143943821:143943902	NC_037328.1	143943821	143943902	chr1	chr1:143943821:143943902	5	CpG-shores;repeats;inter	82	NA	NA	NA	NA	NA	NA	0.751042735042735	0.891288819875776	0.589173357572085	0.693228586720048	0.231132897603486	0.158522012578616	0.0871148459383753	0.264761904761905	-0.545800459582065	0.000708975670791764	0.0946005783461784	0.0164049147547398	0.031564361494274	0.0147472772957225	0.0138471756085464
618	NC_037328.1:143949201:143949257	NC_037328.1	143949201	143949257	chr1	chr1:143949201:143949257	6	repeats;CpG-deserts;inter	57	NA	NA	NA	NA	NA	NA	0.41875	0.360734616427216	0.55237246413717	0.299628942486085	0.985619918699187	0.810041246016856	0.978291316526611	0.90446247464503	0.511732233209303	0.000387771570143743	0.0826732185646652	0.0150213906182092	0.0286818244752302	0.0134540122090646	0.0125712769319815
619	NC_037328.1:143952022:143952041	NC_037328.1	143952022	143952041	chr1	chr1:143952022:143952041	NA	repeats;CpG-deserts;inter	20	NA	NA	NA	NA	NA	NA	0.690917107583774	0.464579822491855	0.626397073765495	0.357384823848238	0.875768625768626	0.789703365299907	0.932824709357728	0.920588235294118	0.344901527007754	0.0135235398341041	0.0456703784370074	0.0373388461709161	0.0715890845770314	0.0309046280989752	0.0322751321271751
620	NC_037328.1:143957643:143957735	NC_037328.1	143957643	143957735	chr1	chr1:143957643:143957735	4	CpG-deserts;inter	93	NA	NA	NA	NA	NA	NA	0.406465517241379	0.424495530012771	0.208602150537634	0.179004329004329	0.749512987012987	0.579218559218559	0.795465838509317	0.653725490196079	0.389838837035207	0.00353061731254872	0.0545518444481535	0.0219061389903758	0.0447305512220508	0.0199866263424543	0.0197581016715625
621	NC_037328.1:143957826:143957928	NC_037328.1	143957826	143957928	chr1	chr1:143957826:143957928	NA	CpG-deserts;inter	103	NA	NA	NA	NA	NA	NA	0.38906431426021	0.203246591743769	0.0203587521840866	0.601572036517591	0.818041972327949	0.988263186580113	0.879822141080541	0.812367575488694	0.57106329519291	0.0149126659191743	0.122661819454968	0.0449062083249252	0.074632938934747	0.0370186863509469	0.0337263047494322
622	NC_037328.1:143958081:143958111	NC_037328.1	143958081	143958111	chr1	chr1:143958081:143958111	NA	repeats;CpG-deserts;inter	31	NA	NA	NA	NA	NA	NA	0.644029639187855	0.661277209546289	0.402195641854086	0.592909483042682	0.984708624708625	0.695656565656566	0.901814718569945	0.757295482295482	0.259765854399926	0.0268400502915713	0.0328112706338157	0.0599043134138768	0.0995890782641892	0.0400313046203604	0.0457694530565695
623	NC_037328.1:143974249:143974332	NC_037328.1	143974249	143974332	chr1	chr1:143974249:143974332	NA	CpG-deserts;inter	84	NA	NA	NA	NA	NA	NA	0.667277167277167	0.829012345679012	0.747903091060986	0.853320128277683	0.339015151515152	0.357484457197513	0.0320261437908497	0.522984672984673	-0.461500576701665	0.0141051502529426	0.0818641872844394	0.0390359051088348	0.0728232691306237	0.0355879333855644	0.0328654514790686
624	NC_037328.1:143986052:143986071	NC_037328.1	143986052	143986071	chr1	chr1:143986052:143986071	NA	CpG-shores;inter	20	NA	NA	NA	NA	NA	NA	0.39733079588152	0.601372722672065	0.37949494949495	0.533131882102134	0.898427763397565	0.649708004122295	1	0.675931677018634	0.328184273596956	0.0222767042436972	0.048200669754979	0.0464791254272154	0.0904841758424578	0.0412613561342324	0.0413364127717378
625	NC_037328.1:143988464:143988530	NC_037328.1	143988464	143988530	chr1	chr1:143988464:143988530	5	CpG-shelves;inter	67	NA	NA	NA	NA	NA	NA	0.907450564971751	0.909882864716678	1	0.858369408369408	0.630409356725146	0.621317244846657	0.74640768588137	0.513917061077304	-0.29091287238184	0.00343232851131831	0.0295428453416348	0.0239029235395833	0.044388110908852	0.0185092607909551	0.01960209330652
626	NC_037328.1:144080082:144080156	NC_037328.1	144080082	144080156	chr1	chr1:144080082:144080156	NA	transcripts;introns;CpG-deserts;genes	75	NA	TRAPPC10	NA	NA	NA	NA	0.700491277847835	0.564021164021164	0.447222222222222	0.590586227572529	1	0.67343093649617	0.978095238095238	0.801117376775272	0.287580664925733	0.0255782207447258	0.0385177595529041	0.0495750901858212	0.0971103077306256	0.0417538546019826	0.0445627077412187
627	NC_037328.1:144083810:144083864	NC_037328.1	144083810	144083864	chr1	chr1:144083810:144083864	0	transcripts;introns;repeats;CpG-deserts;genes	55	NA	TRAPPC10	NA	NA	NA	NA	0.726648351648352	0.794372294372294	0.494089244089244	0.61165663604688	0.0727513227513227	0.261363636363636	0.058974358974359	0.215650753054845	-0.504506613753152	0.00116008023369682	0.0846167500860073	0.0174771922110764	0.0343287779861143	0.0158583268993912	0.0150706031378152
628	NC_037328.1:144083860:144083930	NC_037328.1	144083860	144083930	chr1	chr1:144083860:144083930	NA	transcripts;introns;repeats;CpG-deserts;genes	71	NA	TRAPPC10	NA	NA	NA	NA	0.714285714285714	0.507407407407407	0.822222222222222	0.96969696969697	0.416666666666667	0.169934640522876	0.0416666666666667	0.333333333333333	-0.513002751605693	0.00747454785959824	0.103439093355285	0.0317841535783396	0.0565446481923153	0.0267238862657264	0.025194152628336
629	NC_037328.1:144089076:144089121	NC_037328.1	144089076	144089121	chr1	chr1:144089076:144089121	3	transcripts;introns;CpG-deserts;genes	46	NA	TRAPPC10	NA	NA	NA	NA	0.942627708978328	0.871008305337813	0.961139542191587	0.845331389344511	0.61000111000111	0.702982202982203	0.633178603006189	0.644809438927086	-0.257283897733913	0.000454656594151018	0.0209099747911447	0.0172510426112551	0.0294852722674289	0.0130039967371919	0.0129205387905117
630	NC_037328.1:144090965:144090991	NC_037328.1	144090965	144090991	chr1	chr1:144090965:144090991	3	transcripts;introns;CpG-deserts;genes	27	NA	TRAPPC10	NA	NA	NA	NA	0.660857963875205	0.81650641025641	0.716462281679673	0.60518648018648	0.401545530492899	0.333333333333333	0.039766081871345	0.239846286357914	-0.446130475985569	0.0049527260141813	0.0709414863070128	0.0254026728155669	0.0493226701816397	0.0229193116089958	0.0218504566108307
631	NC_037328.1:144095970:144096072	NC_037328.1	144095970	144096072	chr1	chr1:144095970:144096072	NA	transcripts;introns;CpG-deserts;genes	103	NA	TRAPPC10	NA	NA	NA	NA	0.858695652173913	0.927325581395349	0.977831786713802	0.934216057166877	0.203731815306768	0.54238683127572	0.416666666666667	0.627252252252252	-0.477007877987134	0.0110809501284543	0.0805768446248911	0.0336330638311075	0.0658257973819247	0.031449725211513	0.0295600261498126
632	NC_037328.1:144097417:144097507	NC_037328.1	144097417	144097507	chr1	chr1:144097417:144097507	NA	transcripts;introns;CpG-deserts;genes	91	NA	TRAPPC10	NA	NA	NA	NA	0.567724867724868	0.429692212282624	0.869230769230769	0.799470899470899	0.301619644723093	0.16128762541806	0.242875816993464	0.346055088702148	-0.403570143218099	0.0220238436521714	0.0670704579290398	0.0456908118734894	0.0899876700140437	0.0429618104126547	0.0410915789074495
633	NC_037328.1:144112658:144112710	NC_037328.1	144112658	144112710	chr1	chr1:144112658:144112710	NA	transcripts;introns;CpG-shores;genes	53	NA	TRAPPC10	NA	NA	NA	NA	0.538888888888889	0.533424629742341	0.306513409961686	0.70137207425343	0.997395833333333	0.85093984962406	0.981701940035273	0.929025423728814	0.419716010968784	0.00888498202980205	0.0634882399720866	0.0307726219570793	0.0602136849830752	0.0276344654680121	0.0269323725821
634	NC_037328.1:144165828:144165917	NC_037328.1	144165828	144165917	chr1	chr1:144165828:144165917	NA	CpG-deserts;inter	90	NA	NA	NA	NA	NA	NA	0.491578091708989	0.429625408605	0.543415390175217	0.834691641093258	0.167465356640083	0.213767855879402	0.101305173150499	0.147469197027264	-0.417325737221304	0.0155435974264413	0.0644822287410548	0.0391122820448228	0.0760418545179834	0.0370694902358225	0.0343838608153388
635	NC_037328.1:144167355:144167427	NC_037328.1	144167355	144167427	chr1	chr1:144167355:144167427	3	CpG-deserts;inter	73	NA	NA	NA	NA	NA	NA	0.385585585585586	0.138622247317899	0.238650793650794	0.301971326164875	0.888304093567251	0.576851851851852	0.96978021978022	0.802417866371355	0.543131019712881	0.00282285703644327	0.101232171949422	0.021593829409745	0.0418762190684582	0.0195714536177379	0.0184553645419084
636	NC_037328.1:144167625:144167728	NC_037328.1	144167625	144167728	chr1	chr1:144167625:144167728	1	CpG-deserts;inter	104	NA	NA	NA	NA	NA	NA	0.406666666666667	0.282692307692308	0.466165413533835	0.197151970836181	0.612148988564649	0.767307692307692	0.847454328305392	0.803568350959655	0.419450750352099	0.00201375926804664	0.0610504951585575	0.0195456089333704	0.0385552767509038	0.0173119731154203	0.0169620335622328
637	NC_037328.1:144172677:144172729	NC_037328.1	144172677	144172729	chr1	chr1:144172677:144172729	4	CpG-deserts;inter	53	NA	NA	NA	NA	NA	NA	0.900628166160081	0.612278785471556	0.830653286338248	0.686094041459895	0.132079066444392	0.409542887667888	0.0525221120343072	0.28900376312141	-0.536626612540446	0.0022734589825891	0.100632254557862	0.0206728638574503	0.039619029615386	0.0182582361266099	0.017444193848994
638	NC_037328.1:144173108:144173131	NC_037328.1	144173108	144173131	chr1	chr1:144173108:144173131	3	repeats;CpG-deserts;inter	24	NA	NA	NA	NA	NA	NA	0.539722785665991	0.868680445151033	0.868375262054507	0.982878787878788	0.078811155319776	0.492063492063492	0.189599948308965	0.206410256410256	-0.573193107161957	0.00459887175682125	0.122852345891762	0.02854862447538	0.04812423439688	0.0229863922997455	0.0212953202126976
639	NC_037328.1:144173108:144173201	NC_037328.1	144173108	144173201	chr1	chr1:144173108:144173201	NA	repeats;CpG-deserts;inter	94	NA	NA	NA	NA	NA	NA	0.736842105263158	0.866666666666667	1	0.5	0.461538461538462	0.444444444444444	0	0	-0.54938146648673	0.0183459157330813	0.135013296495735	0.0500777619265365	0.0824352271679562	0.046543417051419	0.0374297098074816
640	NC_037328.1:144173615:144173641	NC_037328.1	144173615	144173641	chr1	chr1:144173615:144173641	4	repeats;CpG-deserts;inter	27	NA	NA	NA	NA	NA	NA	0.587856709168185	0.625024281274281	0.441338490389123	0.394269572235674	0.00862068965517241	0.206029810298103	0	0.156145484949833	-0.419423267041039	0.00154613020356837	0.0602493601442486	0.0182948899369343	0.036450647756903	0.0164682298759926	0.0160069393065924
641	NC_037328.1:144177506:144177520	NC_037328.1	144177506	144177520	chr1	chr1:144177506:144177520	NA	CpG-deserts;inter	15	NA	NA	NA	NA	NA	NA	0.303636738906089	0.47765430193274	0.309808230560658	0.549172991777356	0.687292656192912	0.719890593918727	0.978780239368475	0.671374321880651	0.354266387045981	0.0101111563574287	0.0512637662811172	0.0316766381254061	0.0633143569286516	0.0279643237820136	0.0283930629647926
642	NC_037328.1:144178099:144178153	NC_037328.1	144178099	144178153	chr1	chr1:144178099:144178153	6	CpG-deserts;inter	55	NA	NA	NA	NA	NA	NA	0.465873015873016	0.558375350140056	0.377898236217564	0.537924609881687	0.963717928660826	0.711396011396011	0.93816653934301	0.943125458432823	0.404083681430087	0.00206239024377699	0.05558023512448	0.0192755689622769	0.0387942579578481	0.017347116305348	0.01707250774855
643	NC_037328.1:144197565:144197591	NC_037328.1	144197565	144197591	chr1	chr1:144197565:144197591	3	repeats;CpG-deserts;inter	27	NA	NA	NA	NA	NA	NA	0.398214285714286	0.524305555555556	0.501461988304094	0.459305247597931	0.917668473848249	0.834993413811148	0.899547803617571	0.680508760107817	0.362357843553229	0.00271509345708631	0.0438092874937429	0.0211300340837801	0.0413899770743996	0.0180463105153833	0.0182441402541549
644	NC_037328.1:144198116:144198206	NC_037328.1	144198116	144198206	chr1	chr1:144198116:144198206	NA	repeats;CpG-deserts;inter	91	NA	NA	NA	NA	NA	NA	0.404118404118404	0.267354661162711	0.516551724137931	0.43675274988044	0.969536855838226	0.508779264214047	0.838394938394938	0.864087301587302	0.389005205183757	0.0211610165107579	0.064869267730242	0.0455843087061988	0.0882773268364502	0.0420612443298604	0.0402686351930923
645	NC_037328.1:144198791:144198820	NC_037328.1	144198791	144198820	chr1	chr1:144198791:144198820	NA	CpG-deserts;inter	30	NA	NA	NA	NA	NA	NA	0.542471042471042	0.403364301801802	0.270299145299145	0.682227682227682	0.997619047619048	0.86443816698054	0.878846153846154	0.902894491129785	0.436358921943964	0.0117452790305791	0.0694453909301413	0.0348684469315036	0.0673868384807665	0.0315229397546362	0.0302916648443312
646	NC_037328.1:144201693:144201727	NC_037328.1	144201693	144201727	chr1	chr1:144201693:144201727	2	repeats;CpG-deserts;inter	35	NA	NA	NA	NA	NA	NA	0.613146551724138	0.64760348583878	0.626736111111111	0.58140142021721	0.8669460278246	0.820920490328385	0.887260765550239	0.964454064454064	0.267673444816512	0.000982628461892092	0.0223373667713326	0.0177617116955247	0.0333428557782838	0.0141794015711615	0.0146209959042872
647	NC_037328.1:144224887:144224934	NC_037328.1	144224887	144224934	chr1	chr1:144224887:144224934	NA	CpG-deserts;inter	48	NA	NA	NA	NA	NA	NA	0	0.421717171717172	0.377104377104377	0.516190476190476	0.611111111111111	0.838888888888889	1	0.76521164021164	0.475049903799904	0.0167162414984627	0.0976971567261677	0.0416771569882144	0.0787563204588927	0.0385646417382988	0.0356704659100217
648	NC_037328.1:144226916:144227003	NC_037328.1	144226916	144227003	chr1	chr1:144226916:144227003	NA	CpG-deserts;inter	88	NA	NA	NA	NA	NA	NA	0.412109237132566	0.5365533674529	0.208010920909577	0.49124716553288	0.699242707405973	0.527438625281763	0.645630897731738	0.734275126319137	0.239666666427672	0.0378515604520675	0.0289774433984888	0.0651430259788502	0.120965446767806	0.0488516716787998	0.0563748491257171
649	NC_037328.1:144310406:144310476	NC_037328.1	144310406	144310476	chr1	chr1:144310406:144310476	11	transcripts;first intron;CpG-shores;genes	71	NA	PFKL	NA	NA	NA	NA	0.468887793072576	0.625506405007356	0.485407466724224	0.501396278516397	0.774553933609977	0.723585439518313	1	0.869344696913905	0.321571531680411	0.00649850062800309	0.0380550840175008	0.0270000648186265	0.0539179224577628	0.0232780180311797	0.0239700403337704
650	NC_037328.1:144310666:144310707	NC_037328.1	144310666	144310707	chr1	chr1:144310666:144310707	2	transcripts;first intron;CpG-shores;genes	42	NA	PFKL	NA	NA	NA	NA	0.576609351574213	0.760620608899297	0.661557757218135	0.656840196500597	0.959420995670996	0.83094454887218	0.817255717255717	0.905034057045551	0.21425685116305	0.00548363357244718	0.0174437216490881	0.0626821086202017	0.0508781998997694	0.0214478143392742	0.0225657605145017
651	NC_037328.1:144336895:144336933	NC_037328.1	144336895	144336933	chr1	chr1:144336895:144336933	3	CpG-deserts;inter;downstream	39	NA	NA	NA	NA	NA	PFKL	0.618560606060606	0.690914158305463	0.727039483505001	0.718370529437329	0.96220478512034	0.955216165413534	0.916250880902044	0.850135448916409	0.232230625760982	0.000621413519184116	0.0175785326310393	0.0239062717591745	0.0307149189474293	0.0135578503036463	0.0134698878578438
652	NC_037328.1:144350881:144350924	NC_037328.1	144350881	144350924	chr1	chr1:144350881:144350924	NA	transcripts;first intron;CpG-shores;genes	44	NA	CFAP410	NA	NA	NA	NA	0.0570175438596491	0.295038798920378	0.24921101774043	0.565723270440252	0.725210003029552	0.812669408188807	0.740208764665286	0.566665954492041	0.419440874853744	0.0197503088941266	0.0737237534658577	0.0454672033559051	0.0853520523181687	0.0405790018385587	0.038847931691214
653	NC_037328.1:144351069:144351117	NC_037328.1	144351069	144351117	chr1	chr1:144351069:144351117	NA	transcripts;first intron;CpG-shores;genes	49	NA	CFAP410	NA	NA	NA	NA	0.427196692196692	0.108868421052632	0.425707625707626	0.0561339643247179	0.898891650422352	0.612847594478692	0.792827442827443	0.722524802302963	0.502296196687446	0.00792726731448897	0.0953831243964286	0.0304890958566061	0.0576949262587482	0.0270721826819276	0.0257378924430509
654	NC_037328.1:144371000:144371081	NC_037328.1	144371000	144371081	chr1	chr1:144371000:144371081	6	CpG-deserts;inter	82	NA	NA	NA	NA	NA	NA	0.574497126436782	0.87710843373494	0.626616036636306	0.750423441286627	0.143773649810801	0.20590319792567	0.0100879765395894	0.356516129032258	-0.528091021196584	0.00176265391430575	0.0963727318109338	0.0195351796597483	0.0374161946668416	0.0175355737618961	0.0164353147918446
655	NC_037328.1:1443813:1443849	NC_037328.1	1443813	1443849	chr1	chr1:1443813:1443849	NA	transcripts;first intron;CpG-deserts;genes	37	NA	MRPS6	NA	NA	NA	NA	0.577469135802469	0.63469707131679	0.411107012513763	0.638372507122507	0.821646226057991	0.738620071684588	0.825984945237819	0.694398075043236	0.204750897817026	0.0221930156550957	0.0186324018600553	0.0799494832252172	0.090320919551042	0.0370733262152808	0.0412563535142677
656	NC_037328.1:144401630:144401660	NC_037328.1	144401630	144401660	chr1	chr1:144401630:144401660	NA	CpG-deserts;inter	31	NA	NA	NA	NA	NA	NA	0.619651979565773	0.448064605959343	0.31631467609932	0.363427377220481	0.849512411347518	0.636961451247165	0.921455938697318	0.708236208236208	0.342176842670823	0.0103811338291065	0.0482971586736225	0.0321661088131126	0.0640785316650426	0.0282501372448807	0.028752085427571
657	NC_037328.1:144408029:144408106	NC_037328.1	144408029	144408106	chr1	chr1:144408029:144408106	NA	CpG-deserts;inter	78	NA	NA	NA	NA	NA	NA	0.210904392764858	0.575534759358289	0.295793650793651	0.722727272727273	0.989980158730159	0.749964745284682	0.973625140291807	0.921325828642902	0.45748394932637	0.0232771999015902	0.0894057791730942	0.0484973645163426	0.0924386338691289	0.0462241775292466	0.0422885849052654
658	NC_037328.1:144408204:144408289	NC_037328.1	144408204	144408289	chr1	chr1:144408204:144408289	NA	CpG-deserts;inter	86	NA	NA	NA	NA	NA	NA	0.572267722267722	0.525353535353535	0.235878674171357	0.482287581699346	0.817610915333876	0.829761904761905	0.813632279670016	0.67032032032032	0.328884476648539	0.0142083314650448	0.0429721702962594	0.0362867186867123	0.0730453908689879	0.0313399382599216	0.0329744156737584
659	NC_037328.1:144430955:144431027	NC_037328.1	144430955	144431027	chr1	chr1:144430955:144431027	NA	repeats;CpG-deserts;inter	73	NA	NA	NA	NA	NA	NA	0.32511799624991	0.4190486831589	0.220788535478729	0.338297258297258	0.824719783140836	0.626323116791411	0.950916951249893	0.542561232805135	0.410317152700619	0.0146894705278799	0.0657296722050511	0.0374239820673342	0.0741612257208931	0.0349502472236084	0.0335005128075338
660	NC_037328.1:144435553:144435584	NC_037328.1	144435553	144435584	chr1	chr1:144435553:144435584	NA	CpG-deserts;inter	32	NA	NA	NA	NA	NA	NA	0.456944444444444	0.499269991015274	0.201494107744108	0.543460925039872	0.926315001870557	0.729354354354354	0.729111676721971	0.824832375478927	0.377110985045528	0.00862859566216587	0.0545020550986652	0.0291129901787893	0.0595620245975915	0.0266698829471667	0.0266317650977089
661	NC_037328.1:144435864:144435884	NC_037328.1	144435864	144435884	chr1	chr1:144435864:144435884	NA	CpG-deserts;inter	21	NA	NA	NA	NA	NA	NA	0.323363095238095	0.476110845676063	0.283767213733258	0.178794793779581	0.678435927216415	0.441818181818182	0.782294832826748	0.480710111144894	0.280305776144811	0.0354564296886311	0.0401801017454538	0.0582512829800667	0.116479818800998	0.0493058457173976	0.0541504913448812
662	NC_037328.1:144458943:144459028	NC_037328.1	144458943	144459028	chr1	chr1:144458943:144459028	NA	transcripts;introns;CpG-deserts;genes	86	NA	TSPEAR	NA	NA	NA	NA	0.487025367729166	0.347941919191919	0.297578608667318	0.47111267495504	0.707328266536851	0.538681318681319	0.769103089566972	0.926658335885855	0.334528110031889	0.0164658239655911	0.0466924689494886	0.0395832649557824	0.0781761464836523	0.0345642543367318	0.03540100294478
663	NC_037328.1:144459218:144459295	NC_037328.1	144459218	144459295	chr1	chr1:144459218:144459295	NA	transcripts;introns;CpG-deserts;genes	78	NA	TSPEAR	NA	NA	NA	NA	0.364049612564356	0.4019571876693	0.338915810678491	0.287714285714286	0.870215053763441	0.470543039503191	0.779802259887006	0.616656327543424	0.336144946017657	0.0278661715496314	0.0466893427769124	0.0524859076246136	0.101679622260565	0.0449667496893682	0.0468041957424743
664	NC_037328.1:144468862:144468899	NC_037328.1	144468862	144468899	chr1	chr1:144468862:144468899	6	transcripts;introns;CpG-shores;CpG-shelves;genes	38	NA	TSPEAR	NA	NA	NA	NA	0.850854700854701	0.736471861471861	0.811772486772487	0.663667003707449	0.304468599033816	0.518278988770792	0.301449275362319	0.288218390804598	-0.412587699708743	0.00128585262526328	0.0568032521633712	0.0172434841067382	0.0350099062381399	0.0156733344181869	0.0153781757991162
665	NC_037328.1:144579773:144579836	NC_037328.1	144579773	144579836	chr1	chr1:144579773:144579836	4	transcripts;CDS;first exon;first intron;repeats;CpG-deserts;genes	64	NA	TSPEAR;KRTAP12-2	NA	NA	NA	NA	0.391558441558441	0.367248427672956	0.187931034482759	0.297041294167731	0.944126204764502	0.623780129335685	0.651719576719577	0.673941904873769	0.412447154452912	0.00524201104008884	0.0616354320293355	0.0255095747094848	0.0501693718472459	0.0228659745785373	0.0222401077056845
666	NC_037328.1:144597060:144597127	NC_037328.1	144597060	144597127	chr1	chr1:144597060:144597127	4	transcripts;first intron;CpG-deserts;genes	68	NA	TSPEAR	NA	NA	NA	NA	0.166666666666667	0.285714285714286	0.142857142857143	0	1	0.75	1	0.682539682539682	0.709325396825397	0.000679488147884051	0.161472111992945	0.016693759526652	0.0312711986137328	0.0151106754779301	0.0137233861856491
667	NC_037328.1:144597245:144597287	NC_037328.1	144597245	144597287	chr1	chr1:144597245:144597287	NA	transcripts;first intron;CpG-deserts;genes	43	NA	TSPEAR	NA	NA	NA	NA	0.430776014109347	0.44426145513102	0.245014245014245	0.592056650246305	0.819007381507381	0.825208513085994	0.793219461697723	0.803921568627451	0.382312140104408	0.0121231330341881	0.05051802278229	0.0337555647417264	0.0682848264239034	0.0295930228355996	0.0307143207936242
668	NC_037328.1:144617484:144617559	NC_037328.1	144617484	144617559	chr1	chr1:144617484:144617559	4	transcripts;first intron;CpG-shores;genes	76	NA	TSPEAR	NA	NA	NA	NA	0.624175824175824	0.791249291249291	0.595538847117794	0.564363143631436	0.969810146280735	0.843514957264957	0.982216438950336	0.97635582010582	0.299142564106876	0.00392551341295911	0.0318578418475242	0.0250741105554732	0.0460908062385071	0.0192981420454827	0.0203602408197686
669	NC_037328.1:144672190:144672236	NC_037328.1	144672190	144672236	chr1	chr1:144672190:144672236	NA	transcripts;introns;CpG-deserts;genes	47	NA	UBE2G2	NA	NA	NA	NA	0.394781512605042	0.537959647627167	0.430523255813953	0.48280266075388	0.857733050847458	0.725451336622186	0.815320734814107	0.552821372176211	0.27631485441498	0.0186813827222824	0.0313105102824714	0.0486553189101562	0.0831853670564542	0.0336163827047903	0.0377945937035295
670	NC_037328.1:144673342:144673427	NC_037328.1	144673342	144673427	chr1	chr1:144673342:144673427	NA	transcripts;introns;CpG-deserts;genes	86	NA	UBE2G2	NA	NA	NA	NA	0.267619047619048	0.51571543760223	0.263790806616894	0.48634965034965	0.63674507730937	0.694059146904217	0.737642021720969	0.718645640074212	0.313404235955236	0.0149068686628351	0.0368602036788441	0.0376174769458302	0.0746225295039145	0.0320368355860284	0.0337220284593243
671	NC_037328.1:144695055:144695113	NC_037328.1	144695055	144695113	chr1	chr1:144695055:144695113	NA	transcripts;first intron;CpG-shores;genes	59	NA	SUMO3	NA	NA	NA	NA	0.151794871794872	0.338815854736797	0.529413433698333	0.370381659910341	0.953386148734986	0.514779983965122	0.630737031330252	0.896865918055441	0.401340815486364	0.0243075714604004	0.0752319997627457	0.0495873476996221	0.0945668528695155	0.0467311304998482	0.0433177305374311
672	NC_037328.1:144695306:144695359	NC_037328.1	144695306	144695359	chr1	chr1:144695306:144695359	NA	transcripts;first intron;CpG-shores;genes	54	NA	SUMO3	NA	NA	NA	NA	0.215443578520337	0.36347687400319	0.140285511795079	0.0897551092318534	0.907142857142857	0.390677132391418	0.763408132903546	0.66696223316913	0.479807320514123	0.0136059617442294	0.0922149616729912	0.0377242077282499	0.0717580707048032	0.0347902838853548	0.0323540459191362
673	NC_037328.1:144718248:144718296	NC_037328.1	144718248	144718296	chr1	chr1:144718248:144718296	1	transcripts;introns;CpG-deserts;genes	49	NA	PTTG1IP	NA	NA	NA	NA	0.435809178743961	0.412896825396825	0.346096526424395	0.340929592175853	0.723931623931624	0.600297619047619	0.673737373737374	0.688775510204082	0.287752501044916	0.00018997497093247	0.0257908717546259	0.0140619871191832	0.0267621483723103	0.0120703002623651	0.0117565692851602
674	NC_037328.1:144719456:144719502	NC_037328.1	144719456	144719502	chr1	chr1:144719456:144719502	NA	transcripts;introns;CpG-deserts;genes	47	NA	PTTG1IP	NA	NA	NA	NA	0.435382559305045	0.636966981914717	0.361081840533895	0.7201536643026	0.984100050276521	0.767071759259259	0.877060074428495	0.801255801255801	0.318975659790955	0.0231660504595645	0.0451494129197326	0.0487494978698613	0.0922510446483579	0.0399804852405333	0.0421995353340744
675	NC_037328.1:144726458:144726529	NC_037328.1	144726458	144726529	chr1	chr1:144726458:144726529	4	transcripts;first intron;CpG-shelves;genes	72	NA	PTTG1IP	NA	NA	NA	NA	0.474724724724725	0.380311590481082	0.427828424497429	0.518087855297158	0.699090157154673	0.768072562358277	0.94044044044044	0.829735731734399	0.359096574171849	0.00200506391200834	0.042851019148576	0.0195351796597483	0.0384964606014905	0.0170334367541637	0.0169358751046665
676	NC_037328.1:144726686:144726757	NC_037328.1	144726686	144726757	chr1	chr1:144726686:144726757	5	transcripts;first intron;CpG-shelves;genes	72	NA	PTTG1IP	NA	NA	NA	NA	0.441763708927888	0.525518925518926	0.396329365079365	0.606148676592225	0.986264295172746	0.748388278388278	0.997402597402597	0.9657605466429	0.432013760372029	0.00144975333751978	0.0629926252776442	0.0181518853375949	0.0359529715490339	0.0162724552809695	0.015795242148295
677	NC_037328.1:144726844:144726874	NC_037328.1	144726844	144726874	chr1	chr1:144726844:144726874	6	transcripts;first intron;CpG-shelves;genes	31	NA	PTTG1IP	NA	NA	NA	NA	0.45952380952381	0.233701918037942	0.224074074074074	0.344093406593407	0.8708372237784	0.623232323232323	0.741269841269841	0.644852941176471	0.404699780306951	0.00217042535300907	0.0574841611086258	0.0195628395302531	0.0391796680256847	0.0175391289104147	0.017246744205398
678	NC_037328.1:144727040:144727082	NC_037328.1	144727040	144727082	chr1	chr1:144727040:144727082	6	transcripts;first intron;CpG-shelves;genes	43	NA	PTTG1IP	NA	NA	NA	NA	0.501937984496124	0.430525993292054	0.516835016835017	0.24801395598497	1	0.985300618921309	0.867612293144208	0.887211486849168	0.51070286207663	0.00105670454571738	0.0829886764544036	0.0171724310431405	0.0338198598433776	0.0156275739900166	0.0148351411613604
679	NC_037328.1:144766350:144766365	NC_037328.1	144766350	144766365	chr1	chr1:144766350:144766365	NA	transcripts;introns;CpG-shelves;genes	16	NA	ITGB2	NA	NA	NA	NA	0.58974358974359	0.679662478442966	0.67909148464704	0.619871794871795	0.00462962962962963	0.466903073286052	0.16047619047619	0.121340213731518	-0.4537550601455	0.0167025087829594	0.0763448792419227	0.0407617663394795	0.0787235815699886	0.0384703634043401	0.0356546743156822
680	NC_037328.1:144777603:144777629	NC_037328.1	144777603	144777629	chr1	chr1:144777603:144777629	4	transcripts;first intron;repeats;CpG-deserts;genes	27	NA	ITGB2	NA	NA	NA	NA	0.596707362190159	0.681157532195268	0.68962962962963	0.739764658145668	0.91375497567448	0.920748299319728	0.867863475177305	0.875505802412582	0.217653342605842	0.00224664996384054	0.0153484182500968	0.0388874014910175	0.0394864301647716	0.0169279600146566	0.0173875131507396
681	NC_037328.1:144777918:144777942	NC_037328.1	144777918	144777942	chr1	chr1:144777918:144777942	3	transcripts;first intron;CpG-deserts;genes	25	NA	ITGB2	NA	NA	NA	NA	0.558522727272727	0.494519664732431	0.428416821273964	0.584712790039615	1	0.748685454330616	0.955859658678286	0.979902383003158	0.404568873173331	0.00201459898793644	0.0546615076918956	0.0191641556776993	0.0385552767509038	0.0172839287685411	0.0169620335622328
682	NC_037328.1:144778715:144778772	NC_037328.1	144778715	144778772	chr1	chr1:144778715:144778772	5	transcripts;first intron;CpG-deserts;genes	58	NA	ITGB2	NA	NA	NA	NA	0.555399061032864	0.881086519114688	0.828972953216374	0.787698412698413	0.13966049382716	0.421496598639456	0.157804726368159	0.0803784428540447	-0.56345417109338	0.00168299755747849	0.109393876809691	0.0199157709089661	0.0370754353227219	0.0175355737618961	0.0162844559395666
683	NC_037328.1:144779999:144780105	NC_037328.1	144779999	144780105	chr1	chr1:144779999:144780105	NA	transcripts;first intron;CpG-deserts;genes	107	NA	ITGB2	NA	NA	NA	NA	0.444444444444444	0.583333333333333	0.5	1	0	0	0.166666666666667	0	-0.590277777777777	0.0138318889444132	0.129726080246914	0.0469185468563962	0.0722742086213322	0.0389320795242243	0.0325997489382237
684	NC_037328.1:144780634:144780684	NC_037328.1	144780634	144780684	chr1	chr1:144780634:144780684	NA	transcripts;first intron;CpG-deserts;genes	51	NA	ITGB2	NA	NA	NA	NA	0.200014271442843	0.563570487483531	0.658846872082166	0.551204351204351	0.152187902187902	0.190082846003899	0.140832758224063	0.00416666666666667	-0.37159145228259	0.0272620508639486	0.0596656179219061	0.0501870715223405	0.100448809017013	0.0492235403781607	0.0462020538148774
685	NC_037328.1:144784011:144784085	NC_037328.1	144784011	144784085	chr1	chr1:144784011:144784085	NA	transcripts;first intron;CpG-deserts;genes	75	NA	ITGB2	NA	NA	NA	NA	0.558924505052165	0.274900299644133	0.364981684981685	0.61532704643895	0.894065419508791	0.814352869352869	0.976601645123384	0.828379953379953	0.424816587812016	0.00745535254285746	0.0649238464083016	0.0288083475281676	0.0564920125521014	0.0261888745144859	0.0251697493871047
686	NC_037328.1:144784763:144784810	NC_037328.1	144784763	144784810	chr1	chr1:144784763:144784810	NA	transcripts;first intron;CpG-deserts;genes	48	NA	ITGB2	NA	NA	NA	NA	0.403322040278562	0.471022932466594	0.16025641025641	0.494201680672269	1	0.839663880246404	0.674762308998302	0.690806906272022	0.419107507960723	0.00807994319115867	0.0700878831306115	0.0299097416901037	0.0581108547024073	0.0269944068149673	0.0259334685183307
687	NC_037328.1:144788311:144788345	NC_037328.1	144788311	144788345	chr1	chr1:144788311:144788345	NA	transcripts;first intron;CpG-deserts;genes	35	NA	ITGB2	NA	NA	NA	NA	0.493518518518519	0.469380852903318	0.769455810436166	0.44694777521375	0.068656903233365	0.310262880376088	0.107631874298541	0.152660981988453	-0.385022579293826	0.00742298324079539	0.0569380744241271	0.0278939880398615	0.0564085874736909	0.0252209979280796	0.0251302022422067
688	NC_037328.1:144788654:144788686	NC_037328.1	144788654	144788686	chr1	chr1:144788654:144788686	NA	transcripts;exons;5UTR;CpG-deserts;genes	33	NA	ITGB2	NA	ITGB2	NA	NA	0.294511044511044	0.692754972896817	0.496054964539007	0.431951089845827	0.0521557971014493	0.251937984496124	0.0146587265231333	0.156377819945182	-0.360035435931702	0.0140396188600417	0.0537010573651691	0.0358603876132645	0.072688109643362	0.0327889045485948	0.0328003206573695
689	NC_037328.1:144826204:144826226	NC_037328.1	144826204	144826226	chr1	chr1:144826204:144826226	NA	transcripts;introns;CpG-deserts;genes	23	NA	SLX9	NA	NA	NA	NA	0.703141303141303	0.556622996886155	0.556089466089466	0.632853845981493	0.836686514568935	1	0.752371861025112	0.84364534754608	0.245999027760427	0.00982157402827824	0.0239923770130006	0.0351585470925182	0.0625733908987997	0.0245437921432188	0.0280312895564474
690	NC_037328.1:144894316:144894355	NC_037328.1	144894316	144894355	chr1	chr1:144894316:144894355	7	CpG-deserts;inter	40	NA	NA	NA	NA	NA	NA	0.414745507675442	0.508770658530384	0.314964674500757	0.509370629370629	0.866774019630781	0.616748618613025	0.814608255668382	0.693995215311005	0.311068659786495	0.00591586776852983	0.0368558857970017	0.0261409390543314	0.0522036390141179	0.0222948976315642	0.0231702073029816
691	NC_037328.1:144907080:144907104	NC_037328.1	144907080	144907104	chr1	chr1:144907080:144907104	5	CpG-deserts;inter	25	NA	NA	NA	NA	NA	NA	0.575894308943089	0.430131503716409	0.313690476190476	0.328884078884079	0.916505417956656	0.862037037037037	0.747922077922078	0.757424242424242	0.40882210190149	0.00210184072599259	0.0568888037804552	0.019064897257276	0.0389104816804199	0.017503026795699	0.0171210255574501
692	NC_037328.1:144965877:144965902	NC_037328.1	144965877	144965902	chr1	chr1:144965877:144965902	NA	CpG-deserts;inter	26	NA	NA	NA	NA	NA	NA	0.588034188034188	0.730102950271017	0.591203703703704	0.810344827586207	0.955574980574981	0.930824938301574	0.888751078515962	0.891363436400201	0.236707191049401	0.0184691973627317	0.0215767110965406	0.0708871550235011	0.0827241409132103	0.0337662708924931	0.0375686987321827
693	NC_037328.1:144976299:144976341	NC_037328.1	144976299	144976341	chr1	chr1:144976299:144976341	NA	CpG-shores;inter	43	NA	NA	NA	NA	NA	NA	0.654649947753396	0.553057662212592	0.672664180017121	0.540740740740741	0.713067784765898	0.796853244221665	0.890284495761169	0.884324009324009	0.215854250837223	0.00773186854089644	0.018299893358663	0.04317611477825	0.0572573308513329	0.0239372138031916	0.0255257743460725
694	NC_037328.1:145000107:145000142	NC_037328.1	145000107	145000142	chr1	chr1:145000107:145000142	1	CpG-shores;inter	36	NA	NA	NA	NA	NA	NA	0.560269895707598	0.583375691203426	0.497761497761498	0.483630952380952	0.997835497835498	0.870868347338935	1	0.728409090909091	0.368018724757513	0.00670233405801285	0.04681223611612	0.0272593738725277	0.0544912326655972	0.0236990501916895	0.0242284040492085
695	NC_037328.1:145030534:145030633	NC_037328.1	145030534	145030633	chr1	chr1:145030534:145030633	NA	CpG-deserts;inter	100	NA	NA	NA	NA	NA	NA	0.548280423280423	0.548428571428571	0.508396897220427	0.582001661129568	0.845362052867124	0.734273151828299	0.994285714285714	0.689496187363834	0.269077388321496	0.0258096511727587	0.0289792017531205	0.0572802665796969	0.0975739641973566	0.0393371351234656	0.0447885212327928
696	NC_037328.1:145041413:145041435	NC_037328.1	145041413	145041435	chr1	chr1:145041413:145041435	NA	CpG-deserts;inter	23	NA	NA	NA	NA	NA	NA	0.491128280397616	0.607443124251635	0.823644750519751	0.544588744588745	0.00161290322580645	0.314264053051755	0.374401913875598	0.412215858675486	-0.341077542732275	0.0301339794297592	0.0573624909606623	0.0532065296966161	0.106212234911357	0.0484050751955589	0.0490458517852765
697	NC_037328.1:145041434:145041501	NC_037328.1	145041434	145041501	chr1	chr1:145041434:145041501	2	CpG-deserts;inter	68	NA	NA	NA	NA	NA	NA	0.720634920634921	0.651515151515151	0.619047619047619	0.518518518518518	0	0.264705882352941	0.317460317460317	0.25	-0.419387502475738	0.00407001093821963	0.0618851560873455	0.0236475248202159	0.0465546290880171	0.0208851527362935	0.0205714574405202
698	NC_037328.1:145041884:145041947	NC_037328.1	145041884	145041947	chr1	chr1:145041884:145041947	2	CpG-deserts;inter	64	NA	NA	NA	NA	NA	NA	0.905228758169935	0.671428571428571	0.714024390243902	0.478611492673993	0.118283677107207	0.391699604743083	0.025679012345679	0.150195947944395	-0.520858742594009	0.00450286220346392	0.101076302597723	0.0252949359610897	0.0478205691877956	0.0222674671224675	0.0211526574178873
699	NC_037328.1:145120277:145120327	NC_037328.1	145120277	145120327	chr1	chr1:145120277:145120327	NA	CpG-shelves;inter	51	NA	NA	NA	NA	NA	NA	0.661513687600644	0.426238738738739	0.262962962962963	0.468055555555556	0.826114576114576	0.687780772686433	0.98632333521977	0.858403361344538	0.384962775126854	0.0107961215903851	0.0602897584103533	0.0323263633017999	0.0651323653474545	0.0307460690565999	0.0292365535911997
700	NC_037328.1:145172572:145172658	NC_037328.1	145172572	145172658	chr1	chr1:145172572:145172658	NA	CpG-deserts;inter	87	NA	NA	NA	NA	NA	NA	0.365729935698976	0.279086272223841	0.352040816326531	0.572125603864734	0.838226600985222	0.527662570404506	0.843774509803922	0.937200270178993	0.39447033081464	0.0134873984711622	0.0649083212334412	0.0371719572948128	0.0715299978089725	0.0339072537667346	0.0322461444977604
701	NC_037328.1:145172785:145172844	NC_037328.1	145172785	145172844	chr1	chr1:145172785:145172844	5	CpG-deserts;inter	60	NA	NA	NA	NA	NA	NA	0.411264367816092	0.2828125	0.207398504273504	0.418600795755968	0.970468171960709	0.615644002211166	0.8975	0.816773504273504	0.495077377649954	0.00260146989901472	0.0846042592250871	0.0208585473209176	0.0409125161968314	0.0188998290284959	0.0180388129599423
702	NC_037328.1:145176146:145176185	NC_037328.1	145176146	145176185	chr1	chr1:145176146:145176185	1	CpG-deserts;inter	40	NA	NA	NA	NA	NA	NA	0.481349206349206	0.41735347985348	0.240036231884058	0.316350913125107	0.707058507783145	0.623622782446312	0.667841754798277	0.937698412698413	0.370282906628574	0.00655876519719715	0.0524646363929273	0.026959716824881	0.0540833828810607	0.0237289103351618	0.0240470940294682
703	NC_037328.1:145239193:145239201	NC_037328.1	145239193	145239201	chr1	chr1:145239193:145239201	2	CpG-deserts;inter	9	NA	NA	NA	NA	NA	NA	0.6	0.380463871543265	0.599635103083379	0.581699346405229	0.916351051325584	0.738925802879291	0.897641645096347	0.78554391345089	0.29416602293006	0.00573872166635992	0.0328044258506223	0.026959716824881	0.0516056791885946	0.0214822428643598	0.0228991124589002
704	NC_037328.1:145318519:145318549	NC_037328.1	145318519	145318549	chr1	chr1:145318519:145318549	NA	transcripts;introns;CpG-shelves;genes	31	NA	SLC19A1	NA	NA	NA	NA	0.706122448979592	0.606537279924377	0.518416075650118	0.359770114942529	0.873892773892774	0.777900026530581	0.850800496480644	0.781599781599782	0.273336789751791	0.0280916145046912	0.0316080541761289	0.0556085779473843	0.1021753282416	0.041360433727861	0.0470453388768974
705	NC_037328.1:145340731:145340751	NC_037328.1	145340731	145340751	chr1	chr1:145340731:145340751	NA	repeats;CpG-deserts;inter	21	NA	NA	NA	NA	NA	NA	0.411745646383197	0.617377669500311	0.512746700609634	0.569878732378732	0.628305378831695	0.840630315630316	0.716282689912827	0.880302449170411	0.238443021168344	0.0185905383054753	0.0253236917284079	0.0478617329883503	0.0829784750233264	0.0336083435379597	0.0376983979529926
706	NC_037328.1:145355739:145355834	NC_037328.1	145355739	145355834	chr1	chr1:145355739:145355834	7	repeats;CpG-deserts;inter	96	NA	NA	NA	NA	NA	NA	0.23475935828877	0.171832375274998	0.00909090909090909	0.147351984385166	0.856341463414634	0.746701368806632	0.73554276783177	0.830994328252393	0.651636325316396	7.7286445025081e-05	0.126762931302615	0.0131929322292256	0.0248026329061365	0.0119326698187465	0.0108165466555149
707	NC_037328.1:145356708:145356797	NC_037328.1	145356708	145356797	chr1	chr1:145356708:145356797	7	CpG-deserts;inter	90	NA	NA	NA	NA	NA	NA	0.574330888950772	0.69570915239907	0.472915657327422	0.461420932009167	0.957377627989087	0.911458453826875	0.949340139765672	0.935365967365967	0.387291389565293	0.00482876890941068	0.0481158195730065	0.0245013741847344	0.0489778700185002	0.0213655636779079	0.0216904716005054
708	NC_037328.1:145363381:145363402	NC_037328.1	145363381	145363402	chr1	chr1:145363381:145363402	NA	CpG-deserts;inter	22	NA	NA	NA	NA	NA	NA	0.883089133089133	0.642610837438424	0.611448151893046	0.61845466155811	0.884784878863826	0.924940369707812	0.936469534050179	0.952441756272401	0.235758438728876	0.0330751710937169	0.0234969883273739	0.0669349232728358	0.111992802948653	0.0417073892081094	0.0518995982425311
709	NC_037328.1:145386672:145386757	NC_037328.1	145386672	145386757	chr1	chr1:145386672:145386757	NA	CpG-deserts;inter	86	NA	NA	NA	NA	NA	NA	0.388888888888889	0.337878787878788	0.264956011730205	0.569603174603175	0.836762360446571	0.582915622389307	0.997126436781609	0.723841305153875	0.394829715417576	0.0128012372858818	0.0649495810561418	0.035796176586859	0.0699808275639193	0.0336970877669214	0.0315012341674634
710	NC_037328.1:145436937:145436997	NC_037328.1	145436937	145436997	chr1	chr1:145436937:145436997	NA	transcripts;first intron;CpG-deserts;genes	61	NA	PCBP3	NA	NA	NA	NA	0.644478069100711	0.364182515111308	0.492339604839605	0.598520769153946	0.909008029768899	0.719112625770854	0.845054945054945	0.87380059970015	0.311863810522319	0.0079896891716622	0.0373755408854619	0.0290531962069286	0.0578674101743597	0.0249460805332604	0.0258177225557185
711	NC_037328.1:145437242:145437321	NC_037328.1	145437242	145437321	chr1	chr1:145437242:145437321	NA	transcripts;first intron;CpG-deserts;genes	80	NA	PCBP3	NA	NA	NA	NA	0.413535353535354	0.648941868633649	0.496982456140351	0.511111111111111	0.899614489543711	0.631766153187848	0.940792540792541	0.685458194905869	0.271765147252376	0.0299001582524254	0.0352827389282337	0.0529784845293124	0.105724254294987	0.0468276886346237	0.0488016206899259
712	NC_037328.1:145457004:145457029	NC_037328.1	145457004	145457029	chr1	chr1:145457004:145457029	NA	transcripts;first intron;CpG-deserts;genes	26	NA	PCBP3	NA	NA	NA	NA	0.715811965811966	0.566098484848485	0.737277220829852	0.81163222045575	1	0.884762208939788	0.947579894770678	0.900983519404572	0.225626432792246	0.0142346379026676	0.0202373084717221	0.0603643729397349	0.0731053323302103	0.0301548650735053	0.0330041804875891
713	NC_037328.1:145491790:145491866	NC_037328.1	145491790	145491866	chr1	chr1:145491790:145491866	5	transcripts;first intron;CpG-deserts;genes	77	NA	PCBP3	NA	NA	NA	NA	0.526851851851852	0.551111111111111	0.400510855683269	0.392640692640693	0.848122338366241	0.698989898989899	0.982445520581114	0.757905048295972	0.354087073736575	0.0044365288359836	0.0452892342701897	0.0243924964792346	0.0476345724017268	0.0209876563661418	0.0210656617787443
714	NC_037328.1:145588651:145588724	NC_037328.1	145588651	145588724	chr1	chr1:145588651:145588724	NA	transcripts;introns;repeats;CpG-deserts;genes	74	NA	PCBP3	NA	NA	NA	NA	0.491948968139444	0.647591200222779	0.164664664664665	0.306013257575758	0.962450592885375	0.723651145602365	0.914438502673797	0.835781544256121	0.456525923703753	0.0150887090765	0.0833445449423266	0.0390003485322359	0.0750267281134933	0.035834957014079	0.0339110505559371
715	NC_037328.1:145619563:145619577	NC_037328.1	145619563	145619577	chr1	chr1:145619563:145619577	0	transcripts;introns;CpG-islands;genes	15	NA	PCBP3	NA	NA	NA	NA	0.539958407605466	0.168560606060606	0.347091932457786	0.503780663780664	0.843115377598136	0.809757236227825	0.955555555555556	0.778279197495234	0.456828939243057	0.00711329269110574	0.0745148415991439	0.0288039016391279	0.0556487152333371	0.0263487938319648	0.024768161544079
716	NC_037328.1:145664315:145664392	NC_037328.1	145664315	145664392	chr1	chr1:145664315:145664392	2	CpG-deserts;inter	78	NA	NA	NA	NA	NA	NA	0.105517399267399	0.183141762452107	0.0905555555555556	0.0494746376811594	0.97391196013289	0.508701743462017	0.914935064935065	0.73478835978836	0.675911943340528	0.00554318678999935	0.150644464273488	0.0289423422342601	0.0510196112132258	0.0264480283033776	0.0226334064827921
717	NC_037328.1:145702894:145702902	NC_037328.1	145702894	145702902	chr1	chr1:145702894:145702902	NA	repeats;CpG-deserts;inter	9	NA	NA	NA	NA	NA	NA	0.465916197623515	0.371691941718704	0.18109243697479	0.213732993197279	0.0994623655913979	0.14212962962963	0.0879432624113475	0.0283816425120773	-0.218629167342459	0.0407556221570253	0.022312909662438	0.0789385771767746	0.126276083532973	0.0467374105856369	0.0590842390827013
718	NC_037328.1:145731933:145731990	NC_037328.1	145731933	145731990	chr1	chr1:145731933:145731990	NA	CpG-deserts;inter	58	NA	NA	NA	NA	NA	NA	0.497877445551864	0.470214439476735	0.369123931623932	0.631967515688446	0.91110248447205	1	0.930695549661067	0.63487922705314	0.37687348221132	0.0104727793571443	0.0566882662088079	0.0317095563947154	0.0642851189768839	0.0289374528815869	0.0288427453524978
719	NC_037328.1:145934489:145934542	NC_037328.1	145934489	145934542	chr1	chr1:145934489:145934542	NA	transcripts;CDS;exons;CpG-deserts;genes	54	NA	MCM3AP	NA	NA	NA	NA	0.398671096345515	0.476767676767677	0.49029304029304	0.668308080808081	0.78137017518872	0.859861111111111	0.72914979757085	0.75093370681606	0.271818724118107	0.0104680963622664	0.0280743023456222	0.0335191143266997	0.0642743723078606	0.0263791141181885	0.0288373707772811
720	NC_037328.1:145989419:145989448	NC_037328.1	145989419	145989448	chr1	chr1:145989419:145989448	2	CpG-deserts;inter	30	NA	NA	NA	NA	NA	NA	0.995934959349594	0.970442386831276	0.909569675823546	0.72953216374269	0.600925925925926	0.705870396939263	0.544614223731371	0.521825396825397	-0.308060810581287	0.00722387336323901	0.0361887287492219	0.0278156000239696	0.0558908031123834	0.0245081927442144	0.0248843225882359
721	NC_037328.1:145989419:145989498	NC_037328.1	145989419	145989498	chr1	chr1:145989419:145989498	2	CpG-deserts;inter	80	NA	NA	NA	NA	NA	NA	1	1	1	0.75	0.5	0.666666666666667	0.666666666666667	0.5	-0.354166666666667	0.00484283626380953	0.0465029761904762	0.0251686475857018	0.0490049231503158	0.0219023370826529	0.021703957845758
722	NC_037328.1:145989497:145989579	NC_037328.1	145989497	145989579	chr1	chr1:145989497:145989579	1	CpG-deserts;inter	83	NA	NA	NA	NA	NA	NA	0.791666666666667	1	0.904761904761905	1	0.457142857142857	0.484126984126984	0.2	0.327777777777778	-0.556845238095238	0.000671019871282536	0.100122711617716	0.0160880257985422	0.0312538928774453	0.014716212045994	0.0137124950083162
723	NC_037328.1:146015375:146015428	NC_037328.1	146015375	146015428	chr1	chr1:146015375:146015428	7	CpG-deserts;inter	54	NA	NA	NA	NA	NA	NA	0.360534487315011	0.165839664223899	0.243942307692308	0.19168956043956	0.678971298664393	0.84010582010582	0.812189278227014	0.910087719298246	0.569837024156174	0.000129299531249336	0.0999859982326374	0.0131929322292256	0.0257015770990847	0.0120703002623651	0.0112526515086888
724	NC_037328.1:146015702:146015789	NC_037328.1	146015702	146015789	chr1	chr1:146015702:146015789	1	CpG-deserts;inter	88	NA	NA	NA	NA	NA	NA	0.612105263157895	0.377839618355293	0.444712643678161	0.386006289308176	0.892911255411255	0.879392446633826	0.996969696969697	0.888763197586727	0.459343195525495	0.0010767296402495	0.0666651757413563	0.0172217107549587	0.0339367815756541	0.0156588849313261	0.0148959883131672
725	NC_037328.1:146182659:146182684	NC_037328.1	146182659	146182684	chr1	chr1:146182659:146182684	NA	CpG-deserts;inter	26	NA	NA	NA	NA	NA	NA	0.716092888768411	0.614352138161662	0.286375661375661	0.544376693766938	0.871868065055479	0.878958140253321	0.930218855218855	0.786544850498339	0.32659813223833	0.0321011600349512	0.0464071479880187	0.0584960880690825	0.110114145752802	0.0488155626502251	0.0509658791922843
726	NC_037328.1:146260560:146260613	NC_037328.1	146260560	146260613	chr1	chr1:146260560:146260613	NA	CpG-shelves;inter	54	NA	NA	NA	NA	NA	NA	0.456711055926937	0.572333333333333	0.322279959130054	0.176484593837535	0.89859126984127	0.57076667518528	0.885820399113082	0.712883405902274	0.385063201953512	0.0160111178437938	0.0652899410134116	0.0400168221684337	0.0771457922309935	0.0373729612592994	0.0349111398468821
727	NC_037328.1:146260732:146260797	NC_037328.1	146260732	146260797	chr1	chr1:146260732:146260797	5	CpG-shelves;inter	66	NA	NA	NA	NA	NA	NA	0.479904692082112	0.68088008688864	0.635541389504804	0.485985195360195	0.755228712174525	0.795574126981702	0.92008547008547	0.92816742081448	0.279186091555107	0.00646604009745413	0.0300885428116335	0.029921658771554	0.0538052102406636	0.0222726502842666	0.0239178067091875
728	NC_037328.1:146278112:146278181	NC_037328.1	146278112	146278181	chr1	chr1:146278112:146278181	NA	transcripts;first intron;CpG-shores;genes	70	NA	S100B	NA	NA	NA	NA	0.216845238095238	0.45347817800648	0.101851851851852	0.351473922902494	0.633454106280193	0.575108225108225	0.681884057971014	0.42014295300966	0.296735037878257	0.0234271106089729	0.0408317557659691	0.0484472969654954	0.0927861263567066	0.0399080394009382	0.0424507688247852
729	NC_037328.1:146293084:146293177	NC_037328.1	146293084	146293177	chr1	chr1:146293084:146293177	5	CpG-deserts;inter	94	NA	NA	NA	NA	NA	NA	0.380455818691113	0.352772207367796	0.223650696150696	0.476587795765878	0.914238678585881	0.67189149015236	0.750406331257395	0.632964480874317	0.384008615723618	0.00350394821624467	0.0534441862491258	0.0216453988580893	0.0446642352128371	0.0195467112681895	0.019726909295197
730	NC_037328.1:146293446:146293515	NC_037328.1	146293446	146293515	chr1	chr1:146293446:146293515	5	repeats;CpG-deserts;inter	70	NA	NA	NA	NA	NA	NA	0.174494949494949	0.346153846153846	0.180577706893496	0.55297157622739	0.830760211061169	0.726501668520578	0.88328987396784	0.665681391487843	0.463008766566937	0.00722354430080947	0.079040958118223	0.0288083475281676	0.0558908031123834	0.0265004273481271	0.0248843225882359
731	NC_037328.1:146346449:146346476	NC_037328.1	146346449	146346476	chr1	chr1:146346449:146346476	NA	CpG-deserts;inter;downstream	28	NA	NA	NA	NA	NA	PRMT2	0.446702602952603	0.323242805361905	0.114828431372549	0.308805418719212	0.839175112612613	0.493867243867244	0.897510319917441	0.513192121887774	0.387541384969701	0.0268763882613176	0.0702530062255788	0.0524395521939984	0.0996775327543938	0.0481388959290886	0.0458150582521822
732	NC_037328.1:146465799:146465850	NC_037328.1	146465799	146465850	chr1	chr1:146465799:146465850	3	CpG-deserts;inter	52	NA	NA	NA	NA	NA	NA	0.51219087425984	0.558707643814027	0.352847471127041	0.470878597293692	0.934523809523809	0.705653021442495	0.936580138128126	0.793076923076923	0.368802326419188	0.00254439957545777	0.0476915183275211	0.0205771615477703	0.0406448783030256	0.0178576592824358	0.017917179481242
733	NC_037328.1:146484913:146484964	NC_037328.1	146484913	146484964	chr1	chr1:146484913:146484964	NA	CpG-deserts;inter	52	NA	NA	NA	NA	NA	NA	0.496527777777778	0.389669051878354	0.59418202764977	0.423246753246753	1	0.644478319783198	0.928571428571428	0.734503424657534	0.350981890614876	0.0156058547097213	0.0504451920559311	0.038166770892052	0.0761696378530029	0.0344775373113463	0.0344462190862877
734	NC_037328.1:1464917:1464979	NC_037328.1	1464917	1464979	chr1	chr1:1464917:1464979	4	CpG-deserts;inter	63	NA	NA	NA	NA	NA	NA	0.718449612403101	0.915934065934066	0.859884532419744	0.615301651499831	0.323608723497489	0.320797113334427	0.145019157088123	0.128667628667629	-0.547869309917268	0.000904716577152664	0.0986519660132589	0.0167991822644169	0.0329244909893139	0.0154348186466827	0.0144300375702372
735	NC_037328.1:146505026:146505093	NC_037328.1	146505026	146505093	chr1	chr1:146505026:146505093	3	CpG-deserts;inter	68	NA	NA	NA	NA	NA	NA	0.593657219973009	0.193790849673203	0.286015325670498	0.358870967741935	0.994535519125683	0.680171277997365	0.966931216931217	0.705556488165184	0.478715034790201	0.00706870075820407	0.0899413867113567	0.0285543022054201	0.0555137825190183	0.026177378950846	0.0247027224982273
736	NC_037328.1:146514016:146514089	NC_037328.1	146514016	146514089	chr1	chr1:146514016:146514089	3	repeats;CpG-deserts;inter	74	NA	NA	NA	NA	NA	NA	0.490346947738252	0.669314554709327	0.721442780129263	0.605476139101665	0.933420229096255	0.8128271446863	0.880720147142049	0.918112794217977	0.264624973366019	0.00667132357595502	0.0254924440748667	0.030008354570538	0.0543878233976307	0.0218332447437845	0.0241848453428459
737	NC_037328.1:146529386:146529447	NC_037328.1	146529386	146529447	chr1	chr1:146529386:146529447	NA	transcripts;first intron;CpG-shores;repeats;genes	62	NA	FBXO25	NA	NA	NA	NA	0.42304189435337	0.813452507531455	0.620388696464896	0.664187962575059	0.937728937728938	0.829118000687049	1	0.87189138576779	0.279416815814749	0.0319158844603877	0.0358225087718567	0.0549118127155078	0.10977750585628	0.0472232245945153	0.0507881994468184
738	NC_037328.1:146577367:146577400	NC_037328.1	146577367	146577400	chr1	chr1:146577367:146577400	0	repeats;CpG-deserts;inter	34	NA	NA	NA	NA	NA	NA	0.468371212121212	0.283558558558559	0.203781512605042	0.282407407407407	0.791054671562628	0.693419607212711	0.755450137044065	0.678766588602654	0.42014307843246	0.0019658866810668	0.0570288254815193	0.0188065568279915	0.0382872903670396	0.0171481249441109	0.0168352713762096
739	NC_037328.1:146770578:146770631	NC_037328.1	146770578	146770631	chr1	chr1:146770578:146770631	NA	CpG-deserts;inter	54	NA	NA	NA	NA	NA	NA	0.49690518783542	0.503793604245217	0.179353258696521	0.58875	0.893203928284346	0.701286554429596	0.99002849002849	0.714508240297714	0.382556290565747	0.0168604004418694	0.0642071085469388	0.0406673196606182	0.0790973779789678	0.0378805754510055	0.0358359352975778
740	NC_037328.1:146825939:146825974	NC_037328.1	146825939	146825974	chr1	chr1:146825939:146825974	NA	CpG-deserts;inter	36	NA	NA	NA	NA	NA	NA	0.857758620689655	0.73539886039886	0.808336170695721	0.551807760141093	0.491964285714286	0.492347664707702	0.14718938796953	0.144858523119393	-0.419235387603605	0.0162614093851898	0.0750414260374573	0.0407846825454722	0.0777667648138482	0.037179361740882	0.035206930921911
741	NC_037328.1:146829006:146829099	NC_037328.1	146829006	146829099	chr1	chr1:146829006:146829099	NA	CpG-deserts;inter	94	NA	NA	NA	NA	NA	NA	0.711426000899685	0.982856029612313	0.94989224137931	0.609563952029705	0.189309056956116	0.46218487394958	0.329900839054157	0.504166666666667	-0.442044196823623	0.00966568795441024	0.0786925172328076	0.0324946693059521	0.062203050713428	0.0298746831380791	0.0278570872401921
742	NC_037328.1:146845783:146845822	NC_037328.1	146845783	146845822	chr1	chr1:146845783:146845822	4	CpG-deserts;inter	40	NA	NA	NA	NA	NA	NA	0.228571428571429	0.328484848484848	0.298874544852698	0.577916311452117	0.885990712074303	0.77525641025641	0.820555555555555	0.629831932773109	0.419446869324571	0.00531877274269671	0.0652552344875837	0.0257621892721353	0.050383278973709	0.0236944876019737	0.0223369413293929
743	NC_037328.1:146895551:146895645	NC_037328.1	146895551	146895645	chr1	chr1:146895551:146895645	NA	CpG-deserts;inter	95	NA	NA	NA	NA	NA	NA	0.486786469344609	0.311188811188811	0.566632562991494	0.615151515151515	0.741450703219819	0.731016644174539	0.981302385557705	0.62919621749409	0.275801647942431	0.0334784529494069	0.0389088111290426	0.0573928514598917	0.112785322826654	0.048568372218604	0.0522876020795155
744	NC_037328.1:146895960:146896008	NC_037328.1	146895960	146896008	chr1	chr1:146895960:146896008	5	CpG-deserts;inter	49	NA	NA	NA	NA	NA	NA	0.471826096160462	0.353497354497354	0.203710801393728	0.464357617690951	1	0.653344988344988	0.796486803306025	0.76734637357768	0.430946573871549	0.00426925790727951	0.0687277048928088	0.0240645183681858	0.0471817445610374	0.0217476913577321	0.0208581050390929
745	NC_037328.1:146896081:146896110	NC_037328.1	146896081	146896110	chr1	chr1:146896081:146896110	NA	CpG-deserts;inter	30	NA	NA	NA	NA	NA	NA	0.490972222222222	0.33215811965812	0.337189054726368	0.407407407407407	0.947213622291022	0.587353123067409	0.924121261407789	0.816541353383459	0.426875639033891	0.00817879002141617	0.0660313096695357	0.0293985499891474	0.0583693346103882	0.0277042932683226	0.0260639333818356
746	NC_037328.1:146978126:146978186	NC_037328.1	146978126	146978186	chr1	chr1:146978126:146978186	3	transcripts;introns;CpG-shelves;genes	61	NA	RUNX1	NA	NA	NA	NA	0.550544337383047	0.411218773963872	0.399009713338072	0.346422466422466	0.973223456471196	0.820286534701857	1	0.906658126045336	0.498243206527733	0.000159065289225535	0.0769332425879347	0.0135758641397	0.0266838785655818	0.0122266487523486	0.0116720202108596
747	NC_037328.1:146998472:146998540	NC_037328.1	146998472	146998540	chr1	chr1:146998472:146998540	5	transcripts;introns;CpG-deserts;genes	69	NA	RUNX1	NA	NA	NA	NA	0.382266009852217	0.488873327108621	0.270407740610037	0.524350649350649	0.942866161616162	0.930911680911681	0.933554292929293	0.887940817352582	0.507343806472048	0.00229768388095519	0.0794250241568152	0.0201268165756275	0.0397313328388404	0.0185503926916722	0.017494308414692
748	NC_037328.1:146999000:146999053	NC_037328.1	146999000	146999053	chr1	chr1:146999000:146999053	5	transcripts;introns;CpG-deserts;genes	54	NA	RUNX1	NA	NA	NA	NA	0.504166666666667	0.41118125701459	0.417612721417069	0.374468085106383	0.854585903529174	0.723809523809524	0.83052478285744	0.770394624208183	0.367971526049903	0.000100782166201538	0.0414777910981324	0.0129159857246104	0.0252580427100222	0.0115117397437252	0.0110211638576303
749	NC_037328.1:147002588:147002630	NC_037328.1	147002588	147002630	chr1	chr1:147002588:147002630	NA	transcripts;introns;CpG-deserts;genes	43	NA	RUNX1	NA	NA	NA	NA	0.610576923076923	0.238834154351396	0.45965811965812	0.330409356725146	0.770889894419306	0.868253968253968	0.826739926739927	0.632291666666667	0.364674225567071	0.0121239933023301	0.0537227162123635	0.0328051906894751	0.0682866805998511	0.0306820624307477	0.0307151103941898
750	NC_037328.1:147002729:147002753	NC_037328.1	147002729	147002753	chr1	chr1:147002729:147002753	NA	transcripts;introns;CpG-deserts;genes	25	NA	RUNX1	NA	NA	NA	NA	0.463476078852983	0.403371165724294	0.264802759048283	0.383594470046083	1	0.633971704623879	0.654867601808647	0.796130952380952	0.392431446285459	0.011566742018164	0.0591618335765577	0.0333185871471986	0.0669741216460148	0.0304319769585547	0.0301024701602967
751	NC_037328.1:147017399:147017424	NC_037328.1	147017399	147017424	chr1	chr1:147017399:147017424	NA	transcripts;introns;CpG-deserts;genes	26	NA	RUNX1	NA	NA	NA	NA	0.408008658008658	0.36712715389186	0.237750172532781	0.287555344718533	0.775641025641026	0.489369985282248	0.857317285888714	0.590967365967366	0.353213583406881	0.0171478219464347	0.0502919131964761	0.0393697128379981	0.0798999494015202	0.0361202427398122	0.0362159238760758
752	NC_037328.1:147018121:147018226	NC_037328.1	147018121	147018226	chr1	chr1:147018121:147018226	NA	transcripts;introns;CpG-deserts;genes	106	NA	RUNX1	NA	NA	NA	NA	0.279365079365079	0.345029239766082	0.0965277777777778	0.333333333333333	1	0.622222222222222	0.733333333333333	0.5	0.450325031328321	0.0159187545482056	0.0830898964825443	0.0414216819067459	0.0769267670149362	0.037794098632792	0.0348096982830325
753	NC_037328.1:147018214:147018247	NC_037328.1	147018214	147018247	chr1	chr1:147018214:147018247	4	transcripts;introns;CpG-deserts;genes	34	NA	RUNX1	NA	NA	NA	NA	0.370053922685502	0.536732456140351	0.294040332705587	0.461306865177833	0.969975490196079	0.861802413273002	0.981150793650794	0.782316534040672	0.483277913612818	0.000517853191242591	0.0753590393609491	0.015459654710764	0.0299857821294826	0.0139480238544728	0.0131340161719419
754	NC_037328.1:147018391:147018496	NC_037328.1	147018391	147018496	chr1	chr1:147018391:147018496	8	transcripts;introns;CpG-deserts;genes	106	NA	RUNX1	NA	NA	NA	NA	0.213991683991684	0.246274509803922	0.0716666666666667	0.196207348262741	0.942056850846375	0.690338798738316	0.940165631469979	0.830790816326531	0.668802972164047	0.000196847742380458	0.136369569650458	0.0143308501699872	0.0267621483723103	0.0128093638120577	0.0117565692851602
755	NC_037328.1:147028830:147028879	NC_037328.1	147028830	147028879	chr1	chr1:147028830:147028879	NA	transcripts;introns;CpG-deserts;genes	50	NA	RUNX1	NA	NA	NA	NA	0.476309921962096	0.382770562770563	0.104398148148148	0.376190476190476	0.860027100271003	0.573275862068966	0.859307359307359	0.520736779560309	0.368419498034089	0.0232543806265715	0.0639610709170815	0.0478591476725592	0.0923948786263766	0.0426050213917434	0.0422690008403684
756	NC_037328.1:147029313:147029345	NC_037328.1	147029313	147029345	chr1	chr1:147029313:147029345	0	transcripts;introns;CpG-deserts;genes	33	NA	RUNX1	NA	NA	NA	NA	0.537692239425105	0.262317409989432	0.124751657360353	0.311933283566402	0.991604781749176	0.770666132962421	0.93240347885166	0.863595583160801	0.580393846595691	0.00245907478778467	0.1127439968169	0.0219697921974206	0.0402909474641634	0.0188324064824274	0.0177581513942972
757	NC_037328.1:147029485:147029549	NC_037328.1	147029485	147029549	chr1	chr1:147029485:147029549	NA	transcripts;introns;CpG-deserts;genes	65	NA	RUNX1	NA	NA	NA	NA	0.355088272520196	0.578249433106576	0.314390890051958	0.487854521187854	0.823305285868393	0.589980837215449	0.64774209486166	0.93328154445931	0.314681661384557	0.0214433402906351	0.0453301667560242	0.046574309654444	0.0888629498833358	0.0374936854283053	0.0405481490564592
758	NC_037328.1:147047565:147047587	NC_037328.1	147047565	147047587	chr1	chr1:147047565:147047587	3	transcripts;introns;CpG-deserts;genes	23	NA	RUNX1	NA	NA	NA	NA	0.358834827144686	0.422181750833436	0.295368139223561	0.225484660267269	0.88265306122449	0.681959219858156	0.826296347125964	0.650534188034188	0.434893359693462	0.00105894485250415	0.06244937417155	0.0171152585265685	0.0338366669188802	0.0152499315961692	0.014841922219988
759	NC_037328.1:147048617:147048656	NC_037328.1	147048617	147048656	chr1	chr1:147048617:147048656	NA	transcripts;introns;repeats;CpG-deserts;genes	40	NA	RUNX1	NA	NA	NA	NA	0.488881738881739	0.396405626938414	0.398700386371619	0.143439893439893	0.0482259570494865	0.171726190476191	0	0.0935556691370645	-0.278479957242231	0.0246638600168583	0.0339130045679434	0.0475323422287099	0.0952794181700727	0.0384025071652035	0.0436646835375442
760	NC_037328.1:147049695:147049712	NC_037328.1	147049695	147049712	chr1	chr1:147049695:147049712	5	transcripts;introns;CpG-deserts;genes	18	NA	RUNX1	NA	NA	NA	NA	0.609658187599364	0.902929292929293	0.830079002681743	0.580085741132253	0.197063688999173	0.451268232518233	0.164667363288053	0.141650208470485	-0.492025682766677	0.00389745049513839	0.0889816798307022	0.023939506857271	0.0460244903765358	0.0212960499150189	0.0203332368502621
761	NC_037328.1:147049753:147049777	NC_037328.1	147049753	147049777	chr1	chr1:147049753:147049777	4	transcripts;introns;CpG-deserts;genes	25	NA	RUNX1	NA	NA	NA	NA	0.911111111111111	0.721428571428571	0.671296296296296	0.789473684210526	0.0185185185185185	0.38301282051282	0.00694444444444444	0.180555555555556	-0.626069581003791	0.00185442349515398	0.129889419879089	0.0206083332680365	0.0377698547078755	0.0185184342265697	0.0165966677945544
762	NC_037328.1:147053002:147053099	NC_037328.1	147053002	147053099	chr1	chr1:147053002:147053099	NA	transcripts;introns;CpG-deserts;genes	98	NA	RUNX1	NA	NA	NA	NA	0.428571428571429	0.428571428571429	0.2	0.666666666666667	0.888888888888889	0.6	0.833333333333333	0.9	0.374603174603174	0.021757395639964	0.064065075765756	0.0462360463470477	0.0895039598451012	0.0438653418331956	0.0408515485559184
763	NC_037328.1:147053162:147053210	NC_037328.1	147053162	147053210	chr1	chr1:147053162:147053210	NA	transcripts;introns;CpG-deserts;genes	49	NA	RUNX1	NA	NA	NA	NA	0.635374149659864	0.378228715728716	0.184383517716851	0.4413336386885	0.985754555521997	0.77833892397354	0.743001443001443	0.680599094392198	0.387093498773812	0.0171166617535468	0.0651159519129069	0.0409985169746213	0.0798242938223164	0.037704182962401	0.0361799187438971
764	NC_037328.1:147057131:147057226	NC_037328.1	147057131	147057226	chr1	chr1:147057131:147057226	NA	transcripts;introns;CpG-deserts;genes	96	NA	RUNX1	NA	NA	NA	NA	0.572881828316611	0.285569105691057	0.523935002195872	0.618518518518519	0.979001618536502	0.889689483616401	0.873214285714286	0.692543859649123	0.358386198198563	0.0101886475509776	0.0522920495328976	0.0314192480431613	0.0635304933723464	0.0283145737145637	0.0284918055084086
765	NC_037328.1:147058468:147058580	NC_037328.1	147058468	147058580	chr1	chr1:147058468:147058580	NA	transcripts;introns;CpG-deserts;genes	113	NA	RUNX1	NA	NA	NA	NA	0.648809523809524	0.381197559115179	0.350468883205456	0.724466891133558	0.870931537598204	0.858343841950399	0.966666666666667	0.967297084318361	0.389574068317479	0.0207164742623289	0.0600485213048834	0.0436278767466148	0.0872935491878702	0.0407564710529244	0.0397917594724166
766	NC_037328.1:147058712:147058735	NC_037328.1	147058712	147058735	chr1	chr1:147058712:147058735	2	transcripts;introns;CpG-deserts;genes	24	NA	RUNX1	NA	NA	NA	NA	0.333040935672515	0.209270516717325	0.136217948717949	0.436853002070393	0.977079796264856	0.62015503875969	0.729177326738302	0.8708372237784	0.520466745590767	0.00248721097250193	0.0955130593361036	0.0211934725687397	0.0404513185032324	0.0186721726375534	0.0178295154919827
767	NC_037328.1:147058819:147058925	NC_037328.1	147058819	147058925	chr1	chr1:147058819:147058925	NA	transcripts;introns;CpG-deserts;genes	107	NA	RUNX1	NA	NA	NA	NA	0.444232589587559	0.221706454465075	0.506585062447132	0.087816091954023	0.883115294388556	0.834232558139535	0.862642537642538	0.837931961812559	0.53939553838235	0.0109917338121484	0.099598225767367	0.0344927138527835	0.0655870260337194	0.0320059496353681	0.0294499522900817
768	NC_037328.1:147059679:147059743	NC_037328.1	147059679	147059743	chr1	chr1:147059679:147059743	NA	transcripts;introns;CpG-deserts;genes	65	NA	RUNX1	NA	NA	NA	NA	0.592149225522823	0.698961038961039	0.354	0.574365453728661	0.844695972886762	0.859379122787213	0.702650206597575	0.855603866397698	0.260713362614181	0.0278640066425455	0.0308492662570763	0.060795321924606	0.101679592686803	0.0411752774771386	0.0468041957424743
769	NC_037328.1:147060539:147060588	NC_037328.1	147060539	147060588	chr1	chr1:147060539:147060588	10	transcripts;introns;CpG-deserts;genes	50	NA	RUNX1	NA	NA	NA	NA	0.398886437429271	0.340646577117945	0.478512667222345	0.434734565948583	0.774877344877345	0.639173012522923	0.935330372518807	0.734359464662132	0.357739986715766	0.00527010102650407	0.0445563610123992	0.0257927691976555	0.0502058374504898	0.0215813442903356	0.0222581020791552
770	NC_037328.1:147066861:147066945	NC_037328.1	147066861	147066945	chr1	chr1:147066861:147066945	NA	transcripts;introns;CpG-shelves;genes	85	NA	RUNX1	NA	NA	NA	NA	0.304457953394124	0.426086956521739	0.141268453768454	0.31031746031746	0	0.0478632478632479	0.107710727969349	0.00574712643678161	-0.2552024304331	0.0156002013319707	0.0255451540305259	0.0495326132887842	0.0761646318670957	0.0310865418435788	0.0344426825472489
771	NC_037328.1:147067574:147067654	NC_037328.1	147067574	147067654	chr1	chr1:147067574:147067654	NA	transcripts;introns;CpG-shores;genes	81	NA	RUNX1	NA	NA	NA	NA	0.191348314606742	0.202913096695226	0.357143503262906	0.470718462823726	0.00930232558139535	0.200250529612232	0.00151515151515152	0.0012987012987013	-0.25243916734528	0.0252204517925748	0.029983688574606	0.0575711857493186	0.0964349635459039	0.0387440957094892	0.044224937982956
772	NC_037328.1:147091630:147091665	NC_037328.1	147091630	147091665	chr1	chr1:147091630:147091665	0	transcripts;introns;CpG-deserts;genes	36	NA	RUNX1	NA	NA	NA	NA	0.836601307189543	0.775605373491914	0.871346469622332	0.781420765027322	0.0608974358974359	0.322916666666667	0.11264367816092	0.0434782608695652	-0.681259468434131	0.000779417834840262	0.140603382984112	0.0171265654527145	0.0322658649543468	0.0154126409552371	0.0141421921436995
773	NC_037328.1:147123216:147123268	NC_037328.1	147123216	147123268	chr1	chr1:147123216:147123268	8	transcripts;introns;CpG-deserts;genes	53	NA	RUNX1	NA	NA	NA	NA	0.581181818181818	0.457904875652559	0.175242606580463	0.353039215686274	0.952947468842609	0.815786878216123	1	0.662177328843995	0.465885789950403	0.00685430229625705	0.0845773077229815	0.0288900937452962	0.0549807144241731	0.0255888464935865	0.0244623075913755
774	NC_037328.1:147190477:147190533	NC_037328.1	147190477	147190533	chr1	chr1:147190477:147190533	1	transcripts;introns;CpG-deserts;genes	57	NA	RUNX1	NA	NA	NA	NA	0.437562121622843	0.494281045751634	0.429788450543167	0.410762679055362	0.657690738474092	0.649722668223617	0.787205387205387	0.641025641025641	0.240812534488933	0.00233118492444357	0.0191742356183418	0.026182804401296	0.0397565826773153	0.0170625294846541	0.0175108259529774
775	NC_037328.1:147190902:147190970	NC_037328.1	147190902	147190970	chr1	chr1:147190902:147190970	NA	transcripts;introns;CpG-deserts;genes	69	NA	RUNX1	NA	NA	NA	NA	0.423747412008282	0.578058517194626	0.67985347985348	0.607565514860497	0.88434508688746	0.877656668728097	0.929195823784059	0.673834841867629	0.26895187433759	0.0140673830446043	0.0312182279461237	0.0418437092521263	0.072732971476478	0.0297145660923912	0.032822727901106
776	NC_037328.1:147215911:147215931	NC_037328.1	147215911	147215931	chr1	chr1:147215911:147215931	1	transcripts;introns;CpG-shores;genes	21	NA	RUNX1	NA	NA	NA	NA	0.620175848117025	0.733556832694764	0.66903073286052	0.597715053763441	0.141851204351204	0.258158508158508	0.134439324116743	0.237914131169709	-0.462028824909896	4.45880350021946e-05	0.0643017094796406	0.012600649688457	0.0245176769377293	0.0113378469747453	0.0106516178758721
777	NC_037328.1:147216148:147216249	NC_037328.1	147216148	147216249	chr1	chr1:147216148:147216249	NA	transcripts;introns;CpG-shores;genes	102	NA	RUNX1	NA	NA	NA	NA	0.676117511520737	0.596766174329103	0.477069597069597	0.477393483709273	0.00425531914893617	0.338047619047619	0.0438775510204082	0.280609195402299	-0.390139270502362	0.010732423594972	0.0595317900931475	0.0325700638213336	0.064950753582244	0.0309743579269708	0.0291516397422555
778	NC_037328.1:147240869:147240939	NC_037328.1	147240869	147240939	chr1	chr1:147240869:147240939	NA	transcripts;introns;repeats;CpG-deserts;genes	71	NA	RUNX1	NA	NA	NA	NA	0.92452380952381	0.695231817183037	0.586437671343332	0.641168091168091	0.466202270381837	0.287301587301587	0.0774558046291234	0.432971014492754	-0.395857678103242	0.0147050117792014	0.067658138717292	0.0385429871755084	0.0742013768528594	0.0353841717497747	0.0335193247277106
779	NC_037328.1:147242067:147242171	NC_037328.1	147242067	147242171	chr1	chr1:147242067:147242171	NA	transcripts;introns;CpG-deserts;genes	105	NA	RUNX1	NA	NA	NA	NA	0.463382173382173	0.812064319080129	0.580333255030929	0.499023692658944	0.167528819141722	0.279283886204409	0.278590491752256	0.0427762590365105	-0.396655996004319	0.00772700881977459	0.0609089890167003	0.0284605140611773	0.0572416289640609	0.0267777162546469	0.0255180382857471
780	NC_037328.1:147242354:147242419	NC_037328.1	147242354	147242419	chr1	chr1:147242354:147242419	NA	transcripts;introns;CpG-deserts;genes	66	NA	RUNX1	NA	NA	NA	NA	0.313034560160997	0.671376811594203	0.572806902002107	0.661868686868687	0.0757575757575758	0.311868686868687	0.0467320261437909	0.200883838383838	-0.395961208368026	0.0102939951453835	0.0631507905567166	0.0326223180456202	0.0638372019453699	0.0301353291426656	0.0286389266744826
781	NC_037328.1:147243953:147243987	NC_037328.1	147243953	147243987	chr1	chr1:147243953:147243987	3	transcripts;introns;CpG-deserts;genes	35	NA	RUNX1	NA	NA	NA	NA	0.472222222222222	0.443169398907104	0.632766150296638	0.409863945578231	0.0695822994210091	0.165642915642916	0.00340136054421769	0.228256246677299	-0.372784723679688	0.00181804187105474	0.0481637000495836	0.0189581404182203	0.0376090305099282	0.0166869079623375	0.0165201383156502
782	NC_037328.1:147244108:147244174	NC_037328.1	147244108	147244174	chr1	chr1:147244108:147244174	NA	transcripts;introns;CpG-deserts;genes	67	NA	RUNX1	NA	NA	NA	NA	0.783333333333333	0.362036848878954	0.558465608465608	0.783333333333333	0.00980392156862745	0.136081560283688	0.0247252747252747	0.164021164021164	-0.538134300853119	0.00849733375927012	0.102997883638786	0.0316035555218151	0.0592532052849415	0.0287000412811566	0.0264812137050453
783	NC_037328.1:147244527:147244598	NC_037328.1	147244527	147244598	chr1	chr1:147244527:147244598	3	transcripts;exons;first intron;5UTR;CpG-deserts;genes	72	NA	RUNX1	NA	RUNX1	NA	NA	0.634674922600619	0.344145212285456	0.69040404040404	0.537940379403794	0.00606060606060606	0.223443223443223	0.0242966751918159	0.0908730158730159	-0.465622758531312	0.00336796586868118	0.0760161312156009	0.0226042310683654	0.0441212516720412	0.0205861679076268	0.0194771558833852
784	NC_037328.1:147339343:147339388	NC_037328.1	147339343	147339388	chr1	chr1:147339343:147339388	0	repeats;CpG-deserts;inter	46	NA	NA	NA	NA	NA	NA	0.630952380952381	0.697644649257553	0.458782352399374	0.519731800766284	1	0.738499245852187	0.987654320987654	1	0.354760595866062	0.00591546035776139	0.0480311579834088	0.0261436156961086	0.0522036390141179	0.0226995296930796	0.0231702073029816
785	NC_037328.1:147339437:147339484	NC_037328.1	147339437	147339484	chr1	chr1:147339437:147339484	0	repeats;CpG-deserts;inter	48	NA	NA	NA	NA	NA	NA	0.509719887955182	0.469305843795008	0.432649228705567	0.328898320070734	0.804250208855472	0.714151404151404	0.901325285133062	1	0.419788404403362	0.00213086454889027	0.059436064802093	0.019455778125121	0.0390203057035564	0.0175355737618961	0.0171706777537138
786	NC_037328.1:147341556:147341652	NC_037328.1	147341556	147341652	chr1	chr1:147341556:147341652	1	CpG-deserts;inter	97	NA	NA	NA	NA	NA	NA	0.430735930735931	0.130952380952381	0.149297682035777	0.337962962962963	0.826260504201681	0.654226020892688	0.824242424242424	0.864285714285714	0.530016426733864	0.00158110808897452	0.0931960099391761	0.0190469807554599	0.0365886421302548	0.0169605212861377	0.0160639169159093
787	NC_037328.1:147341714:147341789	NC_037328.1	147341714	147341789	chr1	chr1:147341714:147341789	2	CpG-deserts;inter	76	NA	NA	NA	NA	NA	NA	0.578868342026237	0.367238562091503	0.23655478888037	0.376068376068376	0.931605297157623	0.632275132275132	0.912186379928316	0.722053360351233	0.409847525161455	0.00688739008451203	0.0657129436776949	0.0282681183625975	0.0550725035241435	0.0254332621204069	0.0245042735789798
788	NC_037328.1:147350334:147350392	NC_037328.1	147350334	147350392	chr1	chr1:147350334:147350392	NA	repeats;CpG-deserts;inter	59	NA	NA	NA	NA	NA	NA	0.628108325782744	0.445550896808758	0.521441202475685	0.499841965943661	0.893865121806298	0.661572622779519	0.976666666666667	0.667551488185526	0.27617837710679	0.0322876876150784	0.0352654521884364	0.05622344507943	0.11044479609202	0.0475286489877589	0.0511293861119697
789	NC_037328.1:147361218:147361329	NC_037328.1	147361218	147361329	chr1	chr1:147361218:147361329	NA	CpG-deserts;inter	112	NA	NA	NA	NA	NA	NA	0.548765432098765	0.593968253968254	0.591269841269841	0.398446327683616	0.809078341013825	0.672950970896176	0.868522705860185	0.668768390079865	0.221717638207394	0.0173736216137097	0.0219661147923331	0.0525580410374613	0.0803629280267286	0.0305764677775406	0.0364355963832285
790	NC_037328.1:147396933:147396947	NC_037328.1	147396933	147396947	chr1	chr1:147396933:147396947	4	CpG-deserts;inter	15	NA	NA	NA	NA	NA	NA	0.297354497354497	0.33806146572104	0.383918128654971	0.423515104966718	0.924660179178252	0.611096867140381	0.868355222013759	0.70952380952381	0.417696720289744	0.00625262444751222	0.0600241891515743	0.0264182778118516	0.0531617247071828	0.0238710588353059	0.0236208081680205
791	NC_037328.1:147400399:147400445	NC_037328.1	147400399	147400445	chr1	chr1:147400399:147400445	NA	CpG-deserts;inter	47	NA	NA	NA	NA	NA	NA	0.777665430850466	0.972324312284219	0.919331156173261	0.571637426900585	0.166135328562134	0.567471800230421	0.0735042735042735	0.358636363636364	-0.518802640068835	0.011224721853343	0.111197571618178	0.035283545869412	0.0661497255601144	0.0323100150846989	0.0297141604076146
792	NC_037328.1:147400751:147400792	NC_037328.1	147400751	147400792	chr1	chr1:147400751:147400792	NA	repeats;CpG-deserts;inter	42	NA	NA	NA	NA	NA	NA	1	0.896258837391987	0.845331612613624	0.925478060366498	0.272515798377867	0.704254079254079	0.128667628667629	0.102380952380952	-0.614812512922896	0.0187423416648427	0.143012227937992	0.0556247158581248	0.0833007506994955	0.0460095789412067	0.0378499219231732
793	NC_037328.1:147417326:147417443	NC_037328.1	147417326	147417443	chr1	chr1:147417326:147417443	NA	CpG-deserts;inter	118	NA	NA	NA	NA	NA	NA	0.26675654853621	0.330194805194805	0.7546875	0.286128526645768	0.971677927927928	0.602275943396226	0.958640540745804	0.905914786967418	0.450185454665148	0.0230731098131661	0.0938721469094972	0.0510044890981235	0.0920940401981063	0.0467371535250711	0.0421210803352469
794	NC_037328.1:147451380:147451410	NC_037328.1	147451380	147451410	chr1	chr1:147451380:147451410	NA	repeats;CpG-deserts;inter	31	NA	NA	NA	NA	NA	NA	0.340277777777778	0.329392321383168	0.51031746031746	0.608589607635207	0.914421997755331	0.712533156498674	0.874705275567345	0.621693121693122	0.333694096100215	0.0135657450408377	0.0478133301344906	0.0365533080806067	0.0716829639732286	0.031625442932737	0.0323207141114116
795	NC_037328.1:147455694:147455758	NC_037328.1	147455694	147455758	chr1	chr1:147455694:147455758	NA	CpG-deserts;inter	65	NA	NA	NA	NA	NA	NA	0.347387518142235	0.765079365079365	0.392857142857143	0.510797631487287	0.930841663045053	0.867301587301587	0.982445141065831	0.792460317460317	0.389231762826689	0.0180094353068324	0.061184622781848	0.0417959575898734	0.0817783291119895	0.0379370999256955	0.0371158968363516
796	NC_037328.1:147485890:147485915	NC_037328.1	147485890	147485915	chr1	chr1:147485890:147485915	NA	CpG-deserts;inter	26	NA	NA	NA	NA	NA	NA	0.646240601503759	0.894047619047619	0.672743055555555	0.646544715447154	1	0.942093367625283	0.893356643356643	0.901470057720058	0.219336019286974	0.0280630803584607	0.0209436549177984	0.0938803865537402	0.102129878062957	0.0417993304810245	0.0470208444064363
797	NC_037328.1:147504656:147504673	NC_037328.1	147504656	147504673	chr1	chr1:147504656:147504673	3	repeats;CpG-deserts;inter	18	NA	NA	NA	NA	NA	NA	0.561616161616162	0.717779335634167	0.73172514619883	0.732142857142857	0.986315359477124	0.996527777777778	0.910846560846561	0.949176735370765	0.274900733220053	0.00318326122380089	0.0251999763640118	0.0234781803496345	0.043384816748384	0.0176426151379947	0.0191398193579255
798	NC_037328.1:147513335:147513415	NC_037328.1	147513335	147513415	chr1	chr1:147513335:147513415	NA	CpG-deserts;inter	81	NA	NA	NA	NA	NA	NA	0.313859649122807	0.330634920634921	0.0986658629696604	0.0815668202764977	0.72453634085213	0.530506685432794	0.356802721088435	0.650482456140351	0.359400237627456	0.0145920422938511	0.055686052121602	0.0354606839235205	0.0739247454274067	0.0333934823615626	0.0333937381481701
799	NC_037328.1:147513546:147513603	NC_037328.1	147513546	147513603	chr1	chr1:147513546:147513603	3	CpG-deserts;inter	58	NA	NA	NA	NA	NA	NA	0.298611111111111	0.554964098315383	0.354836010709505	0.408816425120773	0.864019946298427	0.763172677227278	0.910164835164835	0.609907307090406	0.382509280131044	0.00479098068464104	0.0545706673527103	0.0239671411268631	0.0488681307411059	0.0217860750127664	0.0216383183491601
800	NC_037328.1:147513602:147513693	NC_037328.1	147513602	147513693	chr1	chr1:147513602:147513693	NA	CpG-deserts;inter	92	NA	NA	NA	NA	NA	NA	0.421052631578947	0.301190476190476	0.202702702702703	0.257352941176471	1	0.520899470899471	1	0.695454545454545	0.508513816176355	0.0170642343479679	0.101684993631024	0.0433454534558451	0.0796671499416119	0.0405789148547383	0.0361083371447366
801	NC_037328.1:147524681:147524786	NC_037328.1	147524681	147524786	chr1	chr1:147524681:147524786	2	CpG-deserts;inter	106	NA	NA	NA	NA	NA	NA	0.13037037037037	0.392142857142857	0.234167964020066	0.355525606469003	0.902039237358386	0.747383207070707	0.79785447761194	0.749431818181818	0.521125485555139	0.000714741696599926	0.0859482383080691	0.0163169908408608	0.031613504411051	0.0147122666992392	0.013869013562906
802	NC_037328.1:147612790:147612851	NC_037328.1	147612790	147612851	chr1	chr1:147612790:147612851	NA	repeats;CpG-deserts;inter	62	NA	NA	NA	NA	NA	NA	0.381801724137931	0.617452153110048	0.246869836862201	0.232814991733398	0.634757234023953	0.753885943359628	0.638333333333333	0.694511821881411	0.310637406688687	0.0344386744672526	0.0425422454889075	0.0598930872953149	0.114622631893529	0.0484675018319469	0.0531958879165215
803	NC_037328.1:147768126:147768195	NC_037328.1	147768126	147768195	chr1	chr1:147768126:147768195	4	CpG-deserts;inter	70	NA	NA	NA	NA	NA	NA	0.380952380952381	0.528393745557925	0.572420634920635	0.578813844086021	0.894550645481629	0.744281045751634	0.96474358974359	0.914786967418546	0.364445410719609	0.001507929315658	0.0454543739272913	0.018514936689955	0.0362695424852101	0.0159987160462055	0.0159237561979443
804	NC_037328.1:147786820:147786858	NC_037328.1	147786820	147786858	chr1	chr1:147786820:147786858	5	CpG-deserts;inter	39	NA	NA	NA	NA	NA	NA	0.503352490421456	0.552205882352941	0.35836627140975	0.400363202688784	0.875057021831215	0.783150183150183	0.843864468864469	0.660029412902976	0.336953309968978	0.00211660225298025	0.0397501944098717	0.0196434499976729	0.0389645041063716	0.0170444831902679	0.0171454184052785
805	NC_037328.1:147847070:147847126	NC_037328.1	147847070	147847126	chr1	chr1:147847070:147847126	3	CpG-deserts;inter	57	NA	NA	NA	NA	NA	NA	0.496902356902357	0.741841491841492	0.876850114654993	0.727130325814536	0.105908584169454	0.35965379231482	0.233660130718954	0.225083056478405	-0.479604681382936	0.00344504830456909	0.0809768662936498	0.0225012106828751	0.0444440591514884	0.0208673685692405	0.0196266687377149
806	NC_037328.1:148108381:148108461	NC_037328.1	148108381	148108461	chr1	chr1:148108381:148108461	6	repeats;CpG-deserts;inter	81	NA	NA	NA	NA	NA	NA	0.629779940123159	0.584076805598638	0.893112127098604	0.556619997077194	0.0578911663635848	0.292151617623021	0.265073170444379	0.132575456573098	-0.478974364723378	0.00312459769061618	0.081026204053679	0.0218447838056127	0.0431271666631247	0.0202877185188579	0.0190211508712454
807	NC_037328.1:14812864:14812879	NC_037328.1	14812864	14812879	chr1	chr1:14812864:14812879	0	repeats;CpG-deserts;inter	16	NA	NA	NA	NA	NA	NA	0.427179487179487	0.681746031746032	0.376367206164699	0.527777777777778	0.942565359477124	0.851643335362143	0.87718253968254	0.940833333333333	0.399788516246786	0.00625365785342062	0.0543301343087039	0.026068223313016	0.0531640320192932	0.0238693222702259	0.0236217177973883
808	NC_037328.1:148196157:148196170	NC_037328.1	148196157	148196170	chr1	chr1:148196157:148196170	3	CpG-deserts;inter	14	NA	NA	NA	NA	NA	NA	0.438194444444444	0.411481007255655	0.300191331363189	0.383022394577787	0.783543417366947	0.604464285714286	0.871957156767283	0.688383838383838	0.35386488014782	0.00398833236500946	0.0430663314166271	0.023481991992648	0.0463246164468873	0.0201006327637696	0.0204662848980184
809	NC_037328.1:148196588:148196616	NC_037328.1	148196588	148196616	chr1	chr1:148196588:148196616	NA	CpG-deserts;inter	29	NA	NA	NA	NA	NA	NA	0.472732340123645	0.503546767106089	0.178771515095331	0.622739085239085	0.931369478005318	0.644061583577713	0.919870675567375	0.738764970661522	0.364069250061944	0.0235321000477573	0.0615943590797426	0.0478374498905263	0.0929779524398461	0.0458535421171097	0.0425506355934303
810	NC_037328.1:148199660:148199682	NC_037328.1	148199660	148199682	chr1	chr1:148199660:148199682	0	CpG-deserts;inter	23	NA	NA	NA	NA	NA	NA	0.319875776397516	0.0798076923076923	0.339400183150183	0.336868908026403	0.75719322816846	0.530838815789474	0.637820512820513	0.79484126984127	0.411185316684481	0.00328611062763122	0.0613237909326069	0.0220939548276961	0.0437967147385814	0.0196713155589295	0.0193365016728558
811	NC_037328.1:148222061:148222090	NC_037328.1	148222061	148222090	chr1	chr1:148222061:148222090	NA	CpG-deserts;inter	30	NA	NA	NA	NA	NA	NA	0.375757575757576	0.419123931623932	0.510954174513497	0.561210482102977	1	0.800411522633745	0.850617283950617	0.621913580246914	0.351474055708323	0.0125184119414075	0.0487770831797265	0.0347833078063436	0.0692449120815628	0.0306004206306065	0.0311609948175461
812	NC_037328.1:148239762:148239872	NC_037328.1	148239762	148239872	chr1	chr1:148239762:148239872	NA	CpG-deserts;inter	111	NA	NA	NA	NA	NA	NA	0.333333333333333	0.5	0	0.363636363636364	0.692307692307692	0.6	0.875	0.666666666666667	0.409251165501166	0.0219285799684451	0.0730911647962566	0.0473992051967343	0.0898079370478489	0.0443833866425581	0.0410012161686681
813	NC_037328.1:148248086:148248139	NC_037328.1	148248086	148248139	chr1	chr1:148248086:148248139	NA	repeats;CpG-deserts;inter	54	NA	NA	NA	NA	NA	NA	0.624285714285714	0.494416804864566	0.660698198198198	0.82152903355435	0.849127660268965	0.819355413105413	0.857858187134503	0.934238310708899	0.214912455078738	0.0429606966891618	0.0219941073069033	0.0793502292108314	0.130352260637687	0.0484660560050573	0.061149324732796
814	NC_037328.1:148262582:148262595	NC_037328.1	148262582	148262595	chr1	chr1:148262582:148262595	NA	CpG-deserts;inter	14	NA	NA	NA	NA	NA	NA	0.54356324123766	0.548941798941799	0.594229847440538	0.552679991403396	0.871031746031746	0.650671550671551	0.878061224489796	0.736111111111111	0.224115188320203	0.0242765333263762	0.0197949602133195	0.0861033219876324	0.0945072661238886	0.0387587051064075	0.0432869239810926
815	NC_037328.1:148263406:148263435	NC_037328.1	148263406	148263435	chr1	chr1:148263406:148263435	NA	CpG-deserts;inter	30	NA	NA	NA	NA	NA	NA	0.525325410299943	0.778091060985798	0.828472222222222	0.47827875952876	0.210058922558923	0.377208141321045	0.0920524691358025	0.161208791208791	-0.44240978220304	0.00792572326740394	0.0755670395091982	0.0297922418202701	0.0576927283518286	0.0267817878677602	0.0257372709414584
816	NC_037328.1:148282088:148282167	NC_037328.1	148282088	148282167	chr1	chr1:148282088:148282167	NA	CpG-deserts;inter	80	NA	NA	NA	NA	NA	NA	0.487579042457091	0.36807992202729	0.123415275200989	0.603174603174603	0.885473381730188	0.833822091886608	0.763211382113821	0.793523749738439	0.423445440652271	0.0222282403608014	0.0704858756873763	0.0472746585388388	0.0903848593034548	0.0443853075659151	0.0412880659846496
817	NC_037328.1:148314283:148314308	NC_037328.1	148314283	148314308	chr1	chr1:148314283:148314308	NA	repeats;CpG-deserts;inter	26	NA	NA	NA	NA	NA	NA	0.841575091575092	0.926618806306306	0.954076479076479	0.824036281179139	0.146123946527172	0.662424740010947	0.201215049041136	0.310886644219978	-0.556414069584446	0.013891900194914	0.113222380269893	0.0388328116503685	0.0723820000640358	0.0400142699395655	0.0326541430128669
818	NC_037328.1:148325603:148325631	NC_037328.1	148325603	148325631	chr1	chr1:148325603:148325631	NA	transcripts;CDS;exons;CpG-shelves;genes	29	NA	SETD4	NA	NA	NA	NA	0.702712985938792	0.929983060417843	0.933277608915907	0.771751412429378	0.546349206349206	0.679854096520763	0.372607655502392	0.29001452432825	-0.362224896250327	0.0170090637186929	0.0563316394667655	0.0387851907070234	0.0794982422501955	0.0359628931305594	0.0360314243910945
819	NC_037328.1:148325657:148325702	NC_037328.1	148325657	148325702	chr1	chr1:148325657:148325702	NA	transcripts;CDS;exons;CpG-shelves;genes	46	NA	SETD4	NA	NA	NA	NA	0.962962962962963	1	0.991666666666667	0.96969696969697	0.638888888888889	0.287037037037037	0.0196078431372549	0.05	-0.732198207565855	0.0142540652617084	0.188405449112614	0.0476850468606337	0.0731606969407155	0.0405409740384081	0.0330289103604434
820	NC_037328.1:148442569:148442629	NC_037328.1	148442569	148442629	chr1	chr1:148442569:148442629	NA	transcripts;first intron;CpG-shores;repeats;genes	61	NA	CBR3	NA	NA	NA	NA	0.0836601307189542	0.172000948316738	0.283889313301078	0.218443544759334	0.572771213748657	0.740134099616858	0.611111111111111	0.330687830687831	0.374177579517088	0.0144491427969632	0.0555752640920487	0.0353494317764799	0.073554018729476	0.033252140940975	0.0332134053149911
821	NC_037328.1:148442781:148442812	NC_037328.1	148442781	148442812	chr1	chr1:148442781:148442812	3	transcripts;first intron;CpG-shores;repeats;genes	32	NA	CBR3	NA	NA	NA	NA	0.345151339888182	0.406990650141335	0.225859363856796	0.415632515632516	0.765656565656566	0.556865229199788	0.805860136452242	0.698534798534798	0.358320715081141	0.00250364747612014	0.0450847201587712	0.0206807821417497	0.0405271997823708	0.0177886318958255	0.0178634683327208
822	NC_037328.1:148452063:148452126	NC_037328.1	148452063	148452126	chr1	chr1:148452063:148452126	14	repeats;CpG-deserts;inter;downstream	64	NA	NA	NA	NA	NA	CBR3	0.842864453723794	0.657007379381489	0.710740098355306	0.595703682501635	0.130395147463189	0.309515120218128	0.137164468115148	0.273628561458271	-0.488903079176872	0.00046156085057835	0.0766941884469677	0.0150530479745597	0.0295323874157985	0.0136899762428156	0.0129382568466634
823	NC_037328.1:148452836:148452874	NC_037328.1	148452836	148452874	chr1	chr1:148452836:148452874	NA	repeats;CpG-deserts;inter	39	NA	NA	NA	NA	NA	NA	0.9840232389252	0.918637595466864	0.906475624203679	0.922103386809269	0.361363636363636	0.731897926634769	0.26667939903234	0.305808080808081	-0.516372700641547	0.0155891181298975	0.0963040120237314	0.0409896649824562	0.0761427490851213	0.0373776002738223	0.0344327979531621
824	NC_037328.1:148459381:148459450	NC_037328.1	148459381	148459450	chr1	chr1:148459381:148459450	NA	CpG-shores;inter	70	NA	NA	NA	NA	NA	NA	0.445527840765936	0.249934640522876	0.285790598290598	0.412103174603175	0.973351400180669	0.551468085274816	0.782725907725908	0.661740558292282	0.393982424322773	0.0142734047704194	0.0622110296604533	0.0381413271272953	0.0732085392169901	0.033328700458384	0.0330518689899789
825	NC_037328.1:148475179:148475238	NC_037328.1	148475179	148475238	chr1	chr1:148475179:148475238	3	CpG-deserts;inter	60	NA	NA	NA	NA	NA	NA	0.90774062816616	0.909330905821054	0.705806938159879	0.803098591549296	0.21982683982684	0.557769493631562	0.143979933110368	0.325468245943473	-0.519733137796036	0.00480627293776449	0.0951473116770658	0.0258102129779236	0.0489028170039322	0.0228984194114969	0.0216520698768216
826	NC_037328.1:148562559:148562592	NC_037328.1	148562559	148562592	chr1	chr1:148562559:148562592	3	repeats;CpG-deserts;inter	34	NA	NA	NA	NA	NA	NA	0.25	0.4	0.5	0.5	1	1	1	1	0.5875	0.00216282978388814	0.104598214285714	0.0201268165756275	0.0391692341583173	0.0181555594307777	0.0172434446779204
827	NC_037328.1:148562576:148562609	NC_037328.1	148562576	148562609	chr1	chr1:148562576:148562609	NA	repeats;CpG-deserts;inter	34	NA	NA	NA	NA	NA	NA	0.340190816935003	0.733018867924528	0.411483253588517	0.342536475869809	0.829704362365101	0.727891156462585	0.911458333333333	0.856022408963585	0.374461711701687	0.0209245411817339	0.0575971369900717	0.0442958034245239	0.0877713116835976	0.039649544093293	0.0400132638320027
828	NC_037328.1:148585491:148585564	NC_037328.1	148585491	148585564	chr1	chr1:148585491:148585564	NA	repeats;CpG-deserts;inter	74	NA	NA	NA	NA	NA	NA	0.450625057450133	0.430714138711669	0.30755758884595	0.452307692307692	0.940522169815163	0.650112612612613	1	0.730297866091647	0.419932042800995	0.009626686875089	0.0643520368466798	0.0317389718230728	0.0620837907823041	0.0297629815666702	0.0278007367429099
829	NC_037328.1:148591406:148591469	NC_037328.1	148591406	148591469	chr1	chr1:148591406:148591469	NA	CpG-deserts;inter	64	NA	NA	NA	NA	NA	NA	0	0.388888888888889	0.2	0.285714285714286	0.714285714285714	0.555555555555556	1	0.5	0.473809523809524	0.0164585220679316	0.097352337760501	0.041484771943417	0.0781561904255604	0.0389285650938299	0.0353914584956956
830	NC_037328.1:148594069:148594159	NC_037328.1	148594069	148594159	chr1	chr1:148594069:148594159	0	CpG-deserts;inter	91	NA	NA	NA	NA	NA	NA	0.184246451223195	0.275027870680045	0.267252747252747	0.241404428904429	0.0206349206349206	0.0336363636363636	0.0246399984495223	0.00958753839403247	-0.219858169236394	0.00114936614366969	0.0145768345090286	0.0293722531964972	0.0342744058950095	0.0149402531183856	0.0150511299535237
831	NC_037328.1:148604155:148604186	NC_037328.1	148604155	148604186	chr1	chr1:148604155:148604186	2	CpG-shores;repeats;inter	32	NA	NA	NA	NA	NA	NA	0.635867446393762	0.577857687697505	0.525576441102757	0.595841784989858	0.866881374127751	0.813673719181675	0.941753894540272	0.785881370091896	0.268261749439428	0.00108008885315986	0.023475404844684	0.0188656379842515	0.0339367815756541	0.014335577897302	0.0148961106335424
832	NC_037328.1:148618062:148618071	NC_037328.1	148618062	148618071	chr1	chr1:148618062:148618071	NA	CpG-deserts;inter	10	NA	NA	NA	NA	NA	NA	0.688056273327591	0.603627123363966	0.786524822695036	0.603084508657264	0.884557945041816	0.803854542322045	0.935456697298803	0.942222222222222	0.221199669710257	0.00769150259389072	0.0189828751961389	0.0430604822956339	0.0571256659972957	0.0238900287745631	0.0254631788012471
833	NC_037328.1:148621595:148621666	NC_037328.1	148621595	148621666	chr1	chr1:148621595:148621666	5	CpG-deserts;inter	72	NA	NA	NA	NA	NA	NA	0.817207469097004	0.9402451275869	0.827589852008457	0.752440433500677	0.363553639846743	0.611934839971016	0.371910624715002	0.50787284610814	-0.370552732888034	0.00309147009745223	0.0478943586255612	0.021593829409745	0.0429533961287748	0.0188648246296989	0.0189387175909724
834	NC_037328.1:148624601:148624644	NC_037328.1	148624601	148624644	chr1	chr1:148624601:148624644	0	repeats;CpG-deserts;inter	44	NA	NA	NA	NA	NA	NA	0.837037037037037	0.920749655794521	0.930599122930225	0.694166666666667	0.182012195121951	0.46808143547274	0.0808373590982287	0.197186147186147	-0.613608836387346	0.00140217411801524	0.124457810364273	0.0200949844820894	0.0356966017050863	0.0173163044851819	0.0156816784022623
835	NC_037328.1:148709733:148709777	NC_037328.1	148709733	148709777	chr1	chr1:148709733:148709777	3	repeats;CpG-deserts;inter	45	NA	NA	NA	NA	NA	NA	0.483115468409586	0.443442912689996	0.348223499926286	0.54047619047619	0.920531849103278	0.649928926794598	0.93344537815126	0.924657042304101	0.403326281212795	0.00436100667111909	0.0574722885464462	0.0237795155318993	0.047449898940981	0.0216291334102324	0.0209780712291987
836	NC_037328.1:148736021:148736087	NC_037328.1	148736021	148736087	chr1	chr1:148736021:148736087	2	CpG-shores;inter	67	NA	NA	NA	NA	NA	NA	0.394927536231884	0.29320987654321	0.319545234639574	0.538075959128591	0.869444444444444	0.78800660187053	0.742592592592592	0.836129148629149	0.422603545248364	0.00160044212614284	0.0575228516380385	0.0183033179721245	0.0366811991570523	0.0165890170811123	0.0161059330057812
837	NC_037328.1:148792936:148792977	NC_037328.1	148792936	148792977	chr1	chr1:148792936:148792977	NA	CpG-deserts;inter	42	NA	NA	NA	NA	NA	NA	0.177847309136421	0.3176575344154	0.350049743892108	0.214397219994654	0.738586403028381	0.404246031746032	0.626827737875493	0.782592592592593	0.373075239450979	0.0141125344937923	0.0549033055982512	0.0349659132456064	0.0728423299338283	0.0326495914853512	0.0328744230280526
838	NC_037328.1:148839699:148839712	NC_037328.1	148839699	148839712	chr1	chr1:148839699:148839712	0	CpG-deserts;inter	14	NA	NA	NA	NA	NA	NA	0.509115545700912	0.346150696150696	0.300584795321637	0.352758352758353	0.936029411764706	0.704830281169071	0.929933572174951	0.663756613756614	0.431485122233436	0.0038103382182356	0.0656999589568086	0.0232948535750853	0.0456663289481721	0.0209876563661418	0.020178112904424
839	NC_037328.1:148846906:148846915	NC_037328.1	148846906	148846915	chr1	chr1:148846906:148846915	0	CpG-deserts;inter	10	NA	NA	NA	NA	NA	NA	0.525897435897436	0.540792540792541	0.345996732026144	0.459405505083828	0.892016551052696	0.786255411255411	0.861857780462432	0.883012820512821	0.387762587370853	0.000841386188809771	0.047322071127769	0.0164049147547398	0.0326894415952901	0.0144490840251574	0.0143218962953877
840	NC_037328.1:148873332:148873369	NC_037328.1	148873332	148873369	chr1	chr1:148873332:148873369	4	repeats;CpG-deserts;inter	38	NA	NA	NA	NA	NA	NA	0.332608695652174	0.402716868818564	0.347693226725485	0.426046176046176	0.704234417344173	0.767230405528278	0.636779560308972	0.70031746031746	0.324874219064121	0.000101067064006899	0.0322141498109691	0.0131929322292256	0.0252580427100222	0.0115117397437252	0.0110211638576303
841	NC_037328.1:148873736:148873797	NC_037328.1	148873736	148873797	chr1	chr1:148873736:148873797	NA	CpG-deserts;inter	62	NA	NA	NA	NA	NA	NA	0.633465886372724	0.20086255259467	0.436843822843823	0.432370268029843	0.832533594912038	0.689307359307359	0.918611111111111	0.837744252873563	0.393663447090753	0.0131509837686366	0.0615863933760711	0.0361963221826122	0.0707592454207205	0.0318659084262739	0.0318699684230658
842	NC_037328.1:149041760:149041843	NC_037328.1	149041760	149041843	chr1	chr1:149041760:149041843	11	repeats;CpG-deserts;inter	84	NA	NA	NA	NA	NA	NA	0.44835704401889	0.509642655217954	0.263213500846031	0.508050344939226	0.879154401378255	0.793460140760705	0.884462643008608	0.745197496263986	0.393252784097363	0.00233219959379319	0.0519562844580291	0.0199079269570893	0.0397565826773153	0.0178729717111459	0.0175108259529774
843	NC_037328.1:149050162:149050195	NC_037328.1	149050162	149050195	chr1	chr1:149050162:149050195	2	CpG-deserts;inter	34	NA	NA	NA	NA	NA	NA	0.431253322700691	0.517378917378917	0.618311036789298	0.456559237809238	0.953730158730159	0.73099789497639	0.796755884017444	1	0.364495355761462	0.00449959573354834	0.0478692635770541	0.0240415193150897	0.047820459315196	0.0209340492157967	0.0211526574178873
844	NC_037328.1:149056715:149056819	NC_037328.1	149056715	149056819	chr1	chr1:149056715:149056819	NA	CpG-deserts;inter	105	NA	NA	NA	NA	NA	NA	0.48031594464217	0.593767300443831	0.36682216305413	0.716704854569906	0.901115957638923	0.794085192414933	0.719834851578237	0.770551752110012	0.256994372758017	0.0330119813701085	0.0310371727712884	0.0611507231079221	0.111884460430072	0.0447025051689492	0.0518399325921834
845	NC_037328.1:149056918:149056985	NC_037328.1	149056918	149056985	chr1	chr1:149056918:149056985	2	CpG-deserts;inter	68	NA	NA	NA	NA	NA	NA	0.239201680672269	0.551111111111111	0.323842592592593	0.426199460916442	0.876435130782957	0.827177871148459	1	0.845072684246112	0.502082710221278	0.0015301997221208	0.0823826893383284	0.0185336619299566	0.0363558096507684	0.0168515062086668	0.0159644166019383
846	NC_037328.1:149096081:149096096	NC_037328.1	149096081	149096096	chr1	chr1:149096081:149096096	0	CpG-deserts;inter	16	NA	NA	NA	NA	NA	NA	0.639932021270764	0.661699695121951	0.708874458874459	0.800292397660819	1	0.913341750841751	0.987552213868003	0.862701252236136	0.238199161004474	0.00263049397866507	0.0201720950121371	0.0272366850704749	0.0410092422832829	0.0175355737618961	0.0180797502739054
847	NC_037328.1:149235199:149235258	NC_037328.1	149235199	149235258	chr1	chr1:149235199:149235258	NA	repeats;CpG-deserts;inter	60	NA	NA	NA	NA	NA	NA	0.602911705533767	0.437339380196523	0.234508547008547	0.374305555555556	0.795393040475008	0.705026455026455	0.699166733649492	0.789367816091954	0.334972214237129	0.0168179292146577	0.0432303465706448	0.0409700254077527	0.0789939348477049	0.033328700458384	0.0357861907573509
848	NC_037328.1:149237076:149237154	NC_037328.1	149237076	149237154	chr1	chr1:149237076:149237154	4	CpG-deserts;inter	79	NA	NA	NA	NA	NA	NA	0.499021526418787	0.479275362318841	0.310288802509547	0.467929986390038	0.827767892953756	0.860603448275862	0.995341802782819	0.67654748706578	0.400936238360251	0.00333709363943868	0.0565071117304891	0.0212844345240585	0.0440140110540023	0.0197027067269257	0.0194323041956647
849	NC_037328.1:149262646:149262687	NC_037328.1	149262646	149262687	chr1	chr1:149262646:149262687	NA	CpG-shelves;repeats;inter	42	NA	NA	NA	NA	NA	NA	0.397169811320755	0.241313729429887	0.515507745266781	0.439646464646465	0.954131391362515	0.699447326866682	0.572714008137386	0.813192793122371	0.361461942206266	0.0131828493084898	0.0543802355336284	0.0344964610308007	0.0708258432546889	0.0316782312606595	0.0319039656933196
850	NC_037328.1:149294175:149294243	NC_037328.1	149294175	149294243	chr1	chr1:149294175:149294243	7	repeats;CpG-deserts;inter	69	NA	NA	NA	NA	NA	NA	0.341596844016199	0.120209854122898	0.176169590643275	0.245854835910171	0.895411387461013	0.548049351319475	0.75315176856711	0.578867924528302	0.472912326795839	0.00431754600088297	0.0790349013133593	0.0239651171453651	0.0473332124205719	0.0221384983342819	0.0209247499677842
851	NC_037328.1:149296853:149296909	NC_037328.1	149296853	149296909	chr1	chr1:149296853:149296909	3	CpG-deserts;inter	57	NA	NA	NA	NA	NA	NA	0.267763157894737	0.434621710526316	0.263333333333333	0.361159673659674	0.946671826625387	0.768876885826038	0.897100601604278	0.789393939393939	0.518791344508895	0.000123143599772956	0.082904072538104	0.0131929322292256	0.0256013282216543	0.0120703002623651	0.011195379803534
852	NC_037328.1:149297270:149297294	NC_037328.1	149297270	149297294	chr1	chr1:149297270:149297294	3	CpG-deserts;inter	25	NA	NA	NA	NA	NA	NA	0.317287735095954	0.236488059743874	0.242268341587976	0.475373074454429	0.695732700135685	0.659007943766495	0.62278354978355	0.508018037793105	0.30353125514915	0.00560320061953214	0.0344579605203042	0.0272872092176787	0.0511922296587172	0.0219501302944229	0.0227148277395154
853	NC_037328.1:149303928:149304023	NC_037328.1	149303928	149304023	chr1	chr1:149303928:149304023	NA	repeats;CpG-deserts;inter;downstream	96	NA	NA	NA	NA	NA	PIGP	0.726908866995074	0.788727098714794	0.983956306536952	0.828282828282828	0.0773809523809524	0.534348165495707	0.579137089618456	0.352095516569201	-0.446228344116333	0.0213524217019687	0.0842806810867802	0.0480682648773855	0.0886761762613453	0.0434780363246664	0.0404586571662085
854	NC_037328.1:149304166:149304235	NC_037328.1	149304166	149304235	chr1	chr1:149304166:149304235	0	repeats;CpG-deserts;inter;downstream	70	NA	NA	NA	NA	NA	PIGP	0.773245614035088	0.879629629629629	0.691205673758865	0.80077086656034	0.0351654846335697	0.264455879550219	0.0318295739348371	0.301282051282051	-0.628029698645811	0.000880744936631089	0.124263644120213	0.0175242222484486	0.0327951774533681	0.0156733344181869	0.0143711266559774
855	NC_037328.1:149357616:149357640	NC_037328.1	149357616	149357640	chr1	chr1:149357616:149357640	NA	transcripts;introns;CpG-deserts;genes	25	NA	TTC3	NA	NA	NA	NA	0.739009052962541	0.794708994708995	0.424529259503629	0.665313852813853	0.988249118683901	0.835061297246171	0.94693148381673	0.957828524363675	0.276127316030365	0.0353023880667386	0.0351056881289168	0.0584098319238747	0.116213119333502	0.04922115257358	0.0540126153713394
856	NC_037328.1:149406572:149406651	NC_037328.1	149406572	149406651	chr1	chr1:149406572:149406651	7	transcripts;introns;CpG-deserts;genes	80	NA	TTC3	NA	NA	NA	NA	0.477510814538644	0.407339206213887	0.409056611303802	0.579476171800364	0.852688749434353	0.731344127830279	0.854550507252595	0.903593117408907	0.367198424517359	0.00054912220361102	0.0436405458338578	0.0155173386369905	0.0301252166869239	0.0135039639284583	0.0131981537264608
857	NC_037328.1:149414751:149414844	NC_037328.1	149414751	149414844	chr1	chr1:149414751:149414844	NA	transcripts;introns;CpG-deserts;genes	94	NA	TTC3	NA	NA	NA	NA	0.624546444121916	0.915238095238095	0.976260298840944	0.599647266313933	0.615396825396825	0.419753086419753	0.368217054263566	0.207875457875458	-0.376112420139821	0.0270507289250471	0.0687276005257456	0.0526637819805277	0.100021380807519	0.0483245217043286	0.0459860213815979
858	NC_037328.1:149427073:149427080	NC_037328.1	149427073	149427080	chr1	chr1:149427073:149427080	NA	transcripts;introns;CpG-deserts;genes	8	NA	TTC3	NA	NA	NA	NA	0.576664371030282	0.523309384414036	0.334187742082479	0.68502024291498	0.98725013978194	0.837521321731848	0.823529411764706	0.709282345561415	0.309600369599533	0.0172340135168365	0.0421923324303732	0.0419613273889988	0.0801152307554983	0.0336868291848173	0.0363167821388737
859	NC_037328.1:149544753:149544772	NC_037328.1	149544753	149544772	chr1	chr1:149544753:149544772	NA	repeats;CpG-deserts;inter	20	NA	NA	NA	NA	NA	NA	0.460612315101479	0.423665223665224	0.303964568283454	0.650835421888054	1	0.697344322344322	0.895597928436911	0.751388888888889	0.376313402682978	0.00921143110351935	0.057448781309846	0.0303257358819994	0.0610535209923835	0.0275051673351763	0.0273172191875068
860	NC_037328.1:149544753:149544852	NC_037328.1	149544753	149544852	chr1	chr1:149544753:149544852	NA	repeats;CpG-deserts;inter	100	NA	NA	NA	NA	NA	NA	0.682539682539682	0.191666666666667	0.234811165845649	0.166666666666667	1	1	0.984848484848485	0.842592592592593	0.637939223930603	0.0100091314954402	0.144309068514577	0.0368873234786862	0.0630861752305229	0.0332096691803976	0.0282814178868281
861	NC_037328.1:149561044:149561108	NC_037328.1	149561044	149561108	chr1	chr1:149561044:149561108	NA	CpG-deserts;inter	65	NA	NA	NA	NA	NA	NA	0.684915021121918	0.966207759699625	0.991666666666667	0.669015766841854	0.125591016548463	0.663683712121212	0.0556410256410256	0.129761904761905	-0.584281888814365	0.0168469568032206	0.144727459422953	0.052571638594379	0.0790568694382149	0.0438590171616765	0.0358163748745993
862	NC_037328.1:149583189:149583252	NC_037328.1	149583189	149583252	chr1	chr1:149583189:149583252	6	repeats;CpG-deserts;inter	64	NA	NA	NA	NA	NA	NA	0.524305555555556	0.526455026455027	0.474256737414632	0.503472222222222	0.979444444444444	0.861952861952862	0.980245829675154	0.8953081232493	0.422115429418581	0.000213708289338853	0.0527037672074387	0.0137283102810975	0.0270441425899921	0.0124311319257723	0.0118722939936561
863	NC_037328.1:149591164:149591242	NC_037328.1	149591164	149591242	chr1	chr1:149591164:149591242	1	repeats;CpG-deserts;inter	79	NA	NA	NA	NA	NA	NA	0.639492063492064	0.484968638666431	0.347217010631645	0.401514984461321	0.81214716725355	0.674325529542921	0.913457077239773	0.911676092847885	0.359603292408167	0.00570591225373017	0.0493580953495102	0.025844594370972	0.0515056812401572	0.0226465769668018	0.0228558521715815
864	NC_037328.1:149624785:149624873	NC_037328.1	149624785	149624873	chr1	chr1:149624785:149624873	NA	transcripts;first intron;CpG-deserts;genes	89	NA	DYRK1A	NA	NA	NA	NA	0.839460784313726	0.919965277777778	0.98304126625212	0.719412442396313	0.401340996168582	0.703282828282828	0.129432624113475	0.261543209876543	-0.491570028074627	0.0202193557127571	0.100531230626074	0.0466512115353636	0.0863197840670768	0.0422161206747608	0.0393223747795503
865	NC_037328.1:149669580:149669656	NC_037328.1	149669580	149669656	chr1	chr1:149669580:149669656	NA	transcripts;introns;CpG-deserts;genes	77	NA	DYRK1A	NA	NA	NA	NA	0.455026455026455	0.301190476190476	0.250279228967754	0.714506172839506	0.845646945646946	0.66195652173913	0.958333333333333	0.82327926614422	0.392053433459859	0.0239210703124235	0.0689477443677357	0.0490707932243901	0.0937878814349942	0.0449771177823361	0.0429404819876085
866	NC_037328.1:149671662:149671723	NC_037328.1	149671662	149671723	chr1	chr1:149671662:149671723	3	transcripts;introns;CpG-deserts;genes	62	NA	DYRK1A	NA	NA	NA	NA	0.5995670995671	0.904673283705542	0.651947527649655	0.65279488765203	0.115114560236511	0.332299898682877	0.0567903023278277	0.211763285024155	-0.523253688075739	0.00129866297943148	0.0925249722757858	0.018293745209392	0.0350352212980587	0.0163538830823355	0.0153871022846836
867	NC_037328.1:149710522:149710576	NC_037328.1	149710522	149710576	chr1	chr1:149710522:149710576	NA	transcripts;exons;3UTR;CpG-deserts;genes	55	NA	DYRK1A	NA	NA	DYRK1A	NA	0.838482761020074	0.885040266106443	0.857910805463085	0.862211566405115	0.307408476182272	0.534491634491635	0.18128078817734	0.13371070488852	-0.571688448813737	0.00739959456467508	0.107296330667682	0.0299447645105161	0.0563681427529345	0.0276670263797346	0.0251124494843564
868	NC_037328.1:149710522:149710630	NC_037328.1	149710522	149710630	chr1	chr1:149710522:149710630	NA	transcripts;exons;3UTR;CpG-deserts;genes	109	NA	DYRK1A	NA	NA	DYRK1A	NA	1	0.8	0.75	0.857142857142857	0.5	0.428571428571429	0.125	0	-0.588392857142857	0.00994674174215308	0.12846369351312	0.0400168221684337	0.0629037750969776	0.0338342024826864	0.0281947865753963
869	NC_037328.1:149736110:149736192	NC_037328.1	149736110	149736192	chr1	chr1:149736110:149736192	2	CpG-deserts;inter	83	NA	NA	NA	NA	NA	NA	0.541766575184169	0.656785714285714	0.722108843537415	0.479022988505747	0.222443609022556	0.299090909090909	0.181394443633533	0.190280920060332	-0.376618559926429	0.00265262047519847	0.0469194487266457	0.0206163426689135	0.0411171354308412	0.0184498876818327	0.01812689966909
870	NC_037328.1:149748260:149748334	NC_037328.1	149748260	149748334	chr1	chr1:149748260:149748334	NA	CpG-shores;inter	75	NA	NA	NA	NA	NA	NA	1	0.899638802889577	0.944741731698253	0.767276422764228	0.387371700879765	0.788888888888889	0.330555555555556	0.247960372960373	-0.464220109766869	0.0234288330605605	0.0905611183820854	0.0505395823807456	0.0927910854500877	0.0457822226763999	0.0424529791564627
871	NC_037328.1:149752990:149753045	NC_037328.1	149752990	149753045	chr1	chr1:149752990:149753045	1	CpG-shelves;repeats;inter	56	NA	NA	NA	NA	NA	NA	0.471042471042471	0.446560565870911	0.327681992337165	0.525539059738424	0.797829131652661	0.618775287892935	0.899585921325052	0.707878787878788	0.313311259940116	0.00680228519941191	0.0372500581622761	0.0275861064450525	0.0548270968236142	0.0233988514773461	0.0243861881088811
872	NC_037328.1:149782238:149782287	NC_037328.1	149782238	149782287	chr1	chr1:149782238:149782287	2	CpG-deserts;inter	50	NA	NA	NA	NA	NA	NA	0.802641802641803	0.915321769733534	0.943639291465379	0.664760348583878	0.329840780688238	0.337257187257187	0.146017457719585	0.230032925218351	-0.570803715385308	0.000518304401637221	0.103514845973239	0.0159183862863363	0.0299860516866505	0.0139480238544728	0.0131340161719419
873	NC_037328.1:149782562:149782609	NC_037328.1	149782562	149782609	chr1	chr1:149782562:149782609	3	CpG-deserts;inter	48	NA	NA	NA	NA	NA	NA	0.508645276292335	0.671194170604635	0.539423325361	0.81958988380041	0.0670928912105383	0.170891573736162	0	0.0211578947368421	-0.569927574093709	0.00123338753510908	0.103926108905681	0.0185850595761173	0.0347501098356287	0.0163084766058711	0.0152540329965397
874	NC_037328.1:149788340:149788380	NC_037328.1	149788340	149788380	chr1	chr1:149788340:149788380	NA	CpG-deserts;inter	41	NA	NA	NA	NA	NA	NA	0.532490842490842	0.61755698005698	0.202638852067868	0.640785440613027	0.978444825614637	0.733877551020408	0.901771561771562	0.791568556804815	0.353047594995676	0.0309868000160349	0.0583518649888419	0.0547495818022854	0.107931961859048	0.0496997543018109	0.0498830485572151
875	NC_037328.1:149839592:149839666	NC_037328.1	149839592	149839666	chr1	chr1:149839592:149839666	8	CpG-deserts;inter	75	NA	NA	NA	NA	NA	NA	0.41849518087234	0.419787129233676	0.315704108082811	0.246372946716798	0.951651775116559	0.674721093661704	0.692413340225569	0.816217320261438	0.433661041089911	0.00215256184696256	0.0638678847459666	0.0200269467827505	0.039127634930466	0.0181211173750976	0.017219308319577
876	NC_037328.1:149873437:149873529	NC_037328.1	149873437	149873529	chr1	chr1:149873437:149873529	4	CpG-deserts;inter	93	NA	NA	NA	NA	NA	NA	0.179278155706727	0.126251570430675	0.351494378596865	0.372942386831276	0.635633633633634	0.532621784345922	0.733694083694084	0.739092791266704	0.4027689503437	0.00251573022050996	0.0569224993081055	0.0201322199628104	0.0405369965949024	0.0181555594307777	0.0178696614564396
877	NC_037328.1:149880299:149880386	NC_037328.1	149880299	149880386	chr1	chr1:149880299:149880386	NA	repeats;CpG-deserts;inter	88	NA	NA	NA	NA	NA	NA	0.334960939330687	0.15651837524178	0.453069841305135	0.382781662781663	0.889175983436853	0.597825598174435	0.723854615016738	0.464442586399108	0.336991991091967	0.0259352027653313	0.0533660348837698	0.048873542454458	0.0978201450646515	0.0432045704369597	0.0449048011721166
878	NC_037328.1:149881021:149881099	NC_037328.1	149881021	149881099	chr1	chr1:149881021:149881099	7	CpG-deserts;inter	79	NA	NA	NA	NA	NA	NA	0.35475691232398	0.352147653581981	0.441221557305983	0.425872460872461	0.779111114297024	0.628004883950836	0.762004558862966	0.79064439755259	0.346441592644753	0.000554514436389793	0.0376716497089458	0.0153763846664445	0.0302023392309542	0.0135123803717854	0.0132370309840011
879	NC_037328.1:149881271:149881326	NC_037328.1	149881271	149881326	chr1	chr1:149881271:149881326	1	CpG-deserts;inter	56	NA	NA	NA	NA	NA	NA	0	0	0.230357142857143	0.166666666666667	0.766818181818182	0.738416149068323	0.805108695652174	0.415800865800866	0.582280020703934	0.00257263115885114	0.116561290612158	0.0212339564449184	0.0407806215394207	0.0192776035940181	0.0179787703295125
880	NC_037328.1:149881380:149881465	NC_037328.1	149881380	149881465	chr1	chr1:149881380:149881465	3	CpG-deserts;inter	86	NA	NA	NA	NA	NA	NA	0.338023088023088	0.214021164021164	0.092948717948718	0.430112721417069	0.951940035273369	0.510770975056689	0.781676413255361	0.825396825396825	0.498669639393051	0.00629481175441661	0.0950802515520928	0.0280519227737916	0.0533181987935063	0.0253123197742831	0.0236932798238011
881	NC_037328.1:149902600:149902691	NC_037328.1	149902600	149902691	chr1	chr1:149902600:149902691	NA	CpG-deserts;inter	92	NA	NA	NA	NA	NA	NA	0.35978835978836	0.23179012345679	0.225490196078431	0.601818181818182	0.712529890004782	0.65045806906272	0.605211817168339	0.831830095590503	0.345285752671145	0.0205981084250428	0.0514735961471851	0.0431799128871396	0.0870764007679263	0.0383333837973071	0.0396839405893581
882	NC_037328.1:149946853:149946864	NC_037328.1	149946853	149946864	chr1	chr1:149946853:149946864	NA	CpG-shores;inter	12	NA	NA	NA	NA	NA	NA	0.514750957854406	0.315449377949378	0.239878542510121	0.201923076923077	0.714444444444445	0.601010101010101	0.635732323232323	0.76474358974359	0.360982125798369	0.00743968738516189	0.0479247480548708	0.0284012918827166	0.0564497726022059	0.0247908557091674	0.0251490316935517
883	NC_037328.1:149949787:149949800	NC_037328.1	149949787	149949800	chr1	chr1:149949787:149949800	3	CpG-shelves;repeats;inter	14	NA	NA	NA	NA	NA	NA	0.201851851851852	0.178138528138528	0.41301247771836	0.225925925925926	0.763958565589	0.818055555555556	0.878685548293392	0.741072020141787	0.545710726486267	0.000391728883663368	0.0916334127449565	0.0150131053293084	0.0287874814111852	0.0134685358546674	0.012615133749622
884	NC_037328.1:150002858:150002942	NC_037328.1	150002858	150002942	chr1	chr1:150002858:150002942	NA	CpG-deserts;inter	85	NA	NA	NA	NA	NA	NA	0.581626334386778	0.466742689321418	0.431841253722442	0.409282294382058	0.831608391608392	0.725334522310596	0.949479048526365	0.600366208073375	0.304323899676508	0.018157718378341	0.0384881246300561	0.0420190430752984	0.0820540447818673	0.0350991155038494	0.0372500056608547
885	NC_037328.1:150422384:150422441	NC_037328.1	150422384	150422441	chr1	chr1:150422384:150422441	3	CpG-deserts;inter	58	NA	NA	NA	NA	NA	NA	0.337642339544513	0.434886877828054	0.284265582655827	0.433572926025756	0.782017507582024	0.653595238095238	0.889673742138365	0.731208791208791	0.391531888242567	0.000972660733330631	0.0503713903533399	0.0166826435168141	0.0332453616641221	0.0150754692834021	0.0145815528468552
886	NC_037328.1:150460855:150460876	NC_037328.1	150460855	150460876	chr1	chr1:150460855:150460876	0	CpG-deserts;inter	22	NA	NA	NA	NA	NA	NA	0.310606060606061	0.27483660130719	0.315145998429357	0.5752442002442	0.838429012847617	0.751136363636364	0.860952380952381	0.643570889894419	0.404563946685993	0.00412763359425223	0.0591861268466451	0.0232628348277137	0.0467255944510685	0.0210553119087938	0.0206511451619683
887	NC_037328.1:150460991:150461014	NC_037328.1	150460991	150461014	chr1	chr1:150460991:150461014	1	CpG-deserts;inter	24	NA	NA	NA	NA	NA	NA	0.593707482993197	0.467166201512762	0.356972940826643	0.64361658456486	0.898279171808584	0.942805383022774	0.878042328042328	0.701863354037267	0.339881756753373	0.00709909467344684	0.0449429724844174	0.028727849345226	0.0556196305831183	0.024370820424966	0.0247515867331839
888	NC_037328.1:150489306:150489341	NC_037328.1	150489306	150489341	chr1	chr1:150489306:150489341	NA	CpG-deserts;inter	36	NA	NA	NA	NA	NA	NA	0.491785714285714	0.606667510121458	0.470213765562603	0.37098104793757	0.938845286799699	0.652006578947368	0.657602555116787	0.652102199515224	0.240227145617933	0.0362308850009387	0.0292000555355829	0.0769980363975161	0.117925669632578	0.0472490539131706	0.0548735643556761
889	NC_037328.1:150490360:150490373	NC_037328.1	150490360	150490373	chr1	chr1:150490360:150490373	NA	CpG-deserts;inter	14	NA	NA	NA	NA	NA	NA	0.328442028985507	0.187044817927171	0.16978021978022	0.340795007461674	0.4908955778521	0.575744179192455	0.352128647451695	0.432132132132132	0.206209615618452	0.0198091885248976	0.0194864070975038	0.0742342249340719	0.085477304906128	0.0350854575749603	0.0389102807950212
890	NC_037328.1:150509770:150509857	NC_037328.1	150509770	150509857	chr1	chr1:150509770:150509857	NA	CpG-deserts;inter	88	NA	NA	NA	NA	NA	NA	0.346828533785056	0.411366459627329	0.242669839019945	0.516472868217054	0.803095238095238	0.532413793103448	0.836388888888889	0.575729793833242	0.307572503317858	0.0211082682208004	0.0429773713421773	0.0438580682729815	0.0881726527977319	0.0387882819130088	0.0402152720592944
891	NC_037328.1:150517130:150517194	NC_037328.1	150517130	150517194	chr1	chr1:150517130:150517194	NA	repeats;CpG-deserts;inter	65	NA	NA	NA	NA	NA	NA	0.331084656084656	0.332014652014652	0.120689655172414	0.046031746031746	0.8185	0.514638157894737	0.550238095238095	0.555469394489358	0.40225623457968	0.00743467804686753	0.0638737310385965	0.0286797115710458	0.0564443511285475	0.0267817878677602	0.0251464161019846
892	NC_037328.1:150522448:150522478	NC_037328.1	150522448	150522478	chr1	chr1:150522448:150522478	3	CpG-deserts;inter	31	NA	NA	NA	NA	NA	NA	0.595816703621582	0.474572109988777	0.477656579873329	0.461995789952779	0.8223226049313	0.868106312292359	0.911481602557117	0.829365079365079	0.355308603927347	0.00018068240729911	0.0384698988236762	0.0137283102810975	0.0267621483723103	0.0121082313824207	0.0117565692851602
893	NC_037328.1:150591256:150591286	NC_037328.1	150591256	150591286	chr1	chr1:150591256:150591286	NA	transcripts;first intron;CpG-deserts;genes	31	NA	KCNJ15	NA	NA	NA	NA	0.1998556998557	0.218452380952381	0.242196209587514	0.311813186813187	0.577487413884473	0.338888888888889	0.548088410991637	0.558897243107769	0.262761119915996	0.0119312393119055	0.0261275326813515	0.0381948491520335	0.0678323596953632	0.0276807513267032	0.0305080995179852
894	NC_037328.1:150633014:150633120	NC_037328.1	150633014	150633120	chr1	chr1:150633014:150633120	NA	CpG-deserts;inter	107	NA	NA	NA	NA	NA	NA	0.818783068783069	0.865833333333333	0.51183970856102	0.739448051948052	0.0111111111111111	0.552651093807935	0.0808823529411765	0.187002096436059	-0.526064377082298	0.0138332555402734	0.114512845175938	0.03803806819875	0.0722754481779986	0.0351106864079424	0.0326002155359514
895	NC_037328.1:150633233:150633265	NC_037328.1	150633233	150633265	chr1	chr1:150633233:150633265	NA	CpG-deserts;inter	33	NA	NA	NA	NA	NA	NA	0.542805100182149	0.395459770114942	0.41787659752776	0.493732193732194	0.0527728085867621	0.139285714285714	0	0.322586872586873	-0.333807066524424	0.0111296331128363	0.0423995871390688	0.0326844641626226	0.0659471043091017	0.0279485905533278	0.0296145496574749
896	NC_037328.1:150672164:150672195	NC_037328.1	150672164	150672195	chr1	chr1:150672164:150672195	NA	transcripts;introns;CpG-shores;genes	32	NA	ERG	NA	NA	NA	NA	0.505555555555556	0.356209150326797	0.135416666666667	0.239583333333333	0.104513888888889	0	0	0	-0.283062704248366	0.0320257956980146	0.0348934064462267	0.0559728937881783	0.109986796626034	0.0464777800576154	0.0508988498524447
897	NC_037328.1:150672351:150672395	NC_037328.1	150672351	150672395	chr1	chr1:150672351:150672395	4	transcripts;introns;CpG-shores;genes	45	NA	ERG	NA	NA	NA	NA	0.443241943241943	0.742067736185383	0.486936936936937	0.43117002819345	0	0.130784973922229	0.00694444444444444	0.180992618492618	-0.446173651924605	0.00347991241537416	0.0695299868230416	0.0227072021766554	0.0445620160718047	0.0206250770107427	0.0196781655408984
898	NC_037328.1:150672415:150672519	NC_037328.1	150672415	150672519	chr1	chr1:150672415:150672519	6	transcripts;introns;CpG-shores;genes	105	NA	ERG	NA	NA	NA	NA	0.481418918918919	0.682905982905983	0.924901185770751	0.960123886953155	0.142760942760943	0.350835421888053	0.0694444444444444	0.0759734093067426	-0.602583939037156	0.00610474845797113	0.132708815150963	0.0301146572082753	0.0528038399174459	0.0270277878848709	0.023444618783791
899	NC_037328.1:150713366:150713436	NC_037328.1	150713366	150713436	chr1	chr1:150713366:150713436	11	transcripts;introns;CpG-deserts;genes	71	NA	ERG	NA	NA	NA	NA	0.616464440278996	0.813081868148047	0.905312986444348	0.724791745379981	0.0810980520850301	0.269574144676185	0.0410491809233228	0.16965392644523	-0.624568934030401	0.00027639381544563	0.122397262605746	0.0150418441043399	0.0279527670950381	0.0128277818059307	0.0122706933019982
900	NC_037328.1:150715983:150716017	NC_037328.1	150715983	150716017	chr1	chr1:150715983:150716017	6	transcripts;introns;CpG-deserts;genes	35	NA	ERG	NA	NA	NA	NA	0.490929360494578	0.592592592592593	0.803819444444445	0.723076923076923	0.25922619047619	0.357575757575758	0.0274193548387097	0.0336538461538462	-0.483135792891009	0.00452053735394306	0.0866396219342328	0.0254476148163859	0.0478609246461793	0.0224347139474416	0.0211707055734899
901	NC_037328.1:150716095:150716130	NC_037328.1	150716095	150716130	chr1	chr1:150716095:150716130	NA	transcripts;introns;CpG-deserts;genes	36	NA	ERG	NA	NA	NA	NA	0.56832298136646	0.791612182630489	0.593274125538004	0.680434782608696	0.153994036409291	0.543499775078722	0.0789727943046021	0.262418300653595	-0.39868979142436	0.0212082959931507	0.0675541626357937	0.0460257325866231	0.0883995652912059	0.0426535896427089	0.0403285183556717
902	NC_037328.1:150716289:150716343	NC_037328.1	150716289	150716343	chr1	chr1:150716289:150716343	7	transcripts;introns;CpG-deserts;genes	55	NA	ERG	NA	NA	NA	NA	0.688874729195871	0.717181139755767	0.769814447426771	0.87684650455927	0.208834215167548	0.483551617873652	0.160458658988071	0.0924934082311132	-0.526844730169324	0.00413582354041655	0.0948645671346321	0.0240986593585176	0.0467420294148649	0.0219484553941814	0.020658493407614
903	NC_037328.1:150734112:150734159	NC_037328.1	150734112	150734159	chr1	chr1:150734112:150734159	14	transcripts;introns;CpG-deserts;genes	48	NA	ERG	NA	NA	NA	NA	0.271411746516789	0.434552561617957	0.417380757727631	0.521124130673003	0.805917982618756	0.778843423639841	0.925187991826169	0.806288421723204	0.417942155818148	0.00098220041005992	0.0563393244538268	0.0166204610234438	0.0333428557782838	0.0151059651360533	0.0146209959042872
904	NC_037328.1:150734243:150734354	NC_037328.1	150734243	150734354	chr1	chr1:150734243:150734354	NA	transcripts;introns;CpG-deserts;genes	112	NA	ERG	NA	NA	NA	NA	0.172775735294118	0.484966261808367	0.382182226124281	0.621706989247312	0.95345138591071	0.590744810744811	0.830134920634921	0.850942350332594	0.390910563787239	0.0194832161879677	0.0690961059946815	0.0430190811490991	0.0847832576153262	0.0407875905422719	0.0385677812782911
905	NC_037328.1:150741238:150741292	NC_037328.1	150741238	150741292	chr1	chr1:150741238:150741292	4	transcripts;introns;CpG-shelves;genes	55	NA	ERG	NA	NA	NA	NA	0.491880341880342	0.671497584541063	0.560057054201491	0.501587301587302	0.958367666446935	0.81412235563179	0.809662822945555	0.936680469289165	0.323452758025812	0.00130586294819298	0.0354731921530177	0.0175797141495358	0.0350966140783028	0.0154021407425784	0.0154161484393309
906	NC_037328.1:150792500:150792586	NC_037328.1	150792500	150792586	chr1	chr1:150792500:150792586	0	transcripts;first intron;CpG-deserts;genes	87	NA	ERG	NA	NA	NA	NA	0.70519225872167	0.558181764271543	0.511420573474145	0.648386025345099	0.0364007637956645	0.236941620776364	0.135210676141818	0.308564588792261	-0.426515743076587	0.00157142608812194	0.0612992385880299	0.0184844303422152	0.0365347575248081	0.0163593647233685	0.0160395432098074
907	NC_037328.1:150794707:150794735	NC_037328.1	150794707	150794735	chr1	chr1:150794707:150794735	8	transcripts;first intron;CpG-deserts;genes	29	NA	ERG	NA	NA	NA	NA	0.659371302868974	0.747521367521367	0.679042275259083	0.563040293040293	0.101544566544567	0.193571210424514	0.138486772486772	0.0574805840323082	-0.539473026300389	4.65647776777497e-05	0.0870627695332799	0.0126306820258267	0.0245176769377293	0.0113378469747453	0.0106516178758721
908	NC_037328.1:150797880:150797966	NC_037328.1	150797880	150797966	chr1	chr1:150797880:150797966	NA	transcripts;first intron;CpG-deserts;genes	87	NA	ERG	NA	NA	NA	NA	0.385281385281385	0.799908424908425	0.824122807017544	0.850966934300268	0.279738562091503	0.385393972403776	0.217460317460317	0.31438127090301	-0.415826357162254	0.0274502834034748	0.0724088123405184	0.0530851590206539	0.100854166301408	0.0487153341744307	0.0464009503847508
909	NC_037328.1:150798581:150798634	NC_037328.1	150798581	150798634	chr1	chr1:150798581:150798634	NA	transcripts;first intron;CpG-deserts;genes	54	NA	ERG	NA	NA	NA	NA	0.55534188034188	0.479071170979535	0.657139074591905	0.586767626726643	0.115403295821252	0.380288151201284	0.00429391614801949	0.000602772754671489	-0.444432904178684	0.00997516395144997	0.0723866385850611	0.0330932439751336	0.0629704767584429	0.0294149900819714	0.028228928536623
910	NC_037328.1:150798686:150798757	NC_037328.1	150798686	150798757	chr1	chr1:150798686:150798757	3	transcripts;first intron;CpG-deserts;genes	72	NA	ERG	NA	NA	NA	NA	0.503728070175439	0.713624338624339	0.838712522045856	0.705049587402529	0.133465608465608	0.168040293040293	0.0333333333333333	0.139166975651959	-0.571777076939243	0.0015385268182996	0.103116240207743	0.0195250608762323	0.03637400810993	0.017147913995778	0.0159743183069907
911	NC_037328.1:150799563:150799592	NC_037328.1	150799563	150799592	chr1	chr1:150799563:150799592	NA	transcripts;first intron;repeats;CpG-deserts;genes	30	NA	ERG	NA	NA	NA	NA	0.461838885751929	0.5839447102605	0.586764705882353	0.561855290303566	0.196428571428571	0.431808278867102	0.196642096642097	0.122100122100122	-0.311856130790114	0.0125093617827526	0.0370491810951362	0.0347929043710353	0.0692274376823027	0.0293106799807566	0.0311529275438012
912	NC_037328.1:150799645:150799679	NC_037328.1	150799645	150799679	chr1	chr1:150799645:150799679	NA	transcripts;first intron;repeats;CpG-deserts;genes	35	NA	ERG	NA	NA	NA	NA	0.563655336911151	0.731789150295093	0.801535087719298	0.593859649122807	0	0.50019425019425	0	0.16935817805383	-0.505321698950067	0.0157098605624961	0.102242564616806	0.0446272549817739	0.0764165392388164	0.0373435981960735	0.0345612021892595
913	NC_037328.1:150800487:150800521	NC_037328.1	150800487	150800521	chr1	chr1:150800487:150800521	2	transcripts;first intron;CpG-deserts;genes	35	NA	ERG	NA	NA	NA	NA	0.506060606060606	0.775403225806452	0.744725274725275	0.805806182121972	0.027027027027027	0.45959595959596	0.17836822329576	0.0320193902283455	-0.533746172141803	0.00645213476164302	0.107050126829276	0.0299802167857879	0.0537875541140894	0.0254627463660047	0.0239105739420666
914	NC_037328.1:150802999:150803079	NC_037328.1	150802999	150803079	chr1	chr1:150802999:150803079	8	transcripts;first intron;CpG-deserts;genes	81	NA	ERG	NA	NA	NA	NA	0.457050032488629	0.367196422428621	0.703163746118603	0.574885731186695	0.0598223169864961	0.288449328449328	0.0314701514701515	0.0358816832185411	-0.421668113024508	0.00480269245487711	0.0664615174360316	0.0249545847203315	0.0488989053698362	0.0224767803786661	0.0216507964015792
915	NC_037328.1:150803244:150803342	NC_037328.1	150803244	150803342	chr1	chr1:150803244:150803342	16	transcripts;first intron;CpG-deserts;genes	99	NA	ERG	NA	NA	NA	NA	0.526111445885188	0.797616702553297	0.908377482975049	0.860110838580988	0.190524966852153	0.418055033926729	0.0585975440806392	0.066102057618259	-0.589734216879185	0.00264055997779239	0.123928052488641	0.022878232493047	0.0410631491970379	0.0207663458229996	0.018105137922034
916	NC_037328.1:150804121:150804130	NC_037328.1	150804121	150804130	chr1	chr1:150804121:150804130	3	promoters;CpG-deserts;inter	10	ERG	NA	NA	NA	NA	NA	0.554571449792038	0.640928270042194	0.75	0.822548466026727	0.0433747412008282	0.300507246376812	0.0885121874010763	0.111455328846633	-0.556049670508902	0.000501875335553824	0.0998262716862861	0.0153763846664445	0.0299295504217446	0.0138206253966218	0.0131134060348476
917	NC_037328.1:150849283:150849310	NC_037328.1	150849283	150849310	chr1	chr1:150849283:150849310	2	CpG-deserts;inter	28	NA	NA	NA	NA	NA	NA	0.602350427350427	0.48719806763285	0.354545454545455	0.319444444444444	0.969064172868521	0.842857142857143	1	0.773714445845593	0.45552434189952	0.0018186373172359	0.0713363980970623	0.0193846418768048	0.0376090305099282	0.0175106381127807	0.0165201383156502
918	NC_037328.1:150939363:150939430	NC_037328.1	150939363	150939430	chr1	chr1:150939363:150939430	NA	CpG-deserts;inter	68	NA	NA	NA	NA	NA	NA	0.305318138651472	0.236986527228189	0.0392156862745098	0.224896019013666	0.667545888134124	0.32977181621955	0.648919596288017	0.72851966873706	0.392085149552729	0.0136865451718395	0.0632456293129695	0.0369148841997464	0.0719362097895198	0.0331654751702823	0.0324410370056941
919	NC_037328.1:150957815:150957852	NC_037328.1	150957815	150957852	chr1	chr1:150957815:150957852	3	CpG-deserts;inter	38	NA	NA	NA	NA	NA	NA	0.437934904601571	0.308455165692008	0.184027777777778	0.298158954408954	0.862813165579782	0.813492063492063	0.701970211161388	0.671770025839793	0.455367165898179	0.000621193156659679	0.0673747902022307	0.0157906581055438	0.0307149189474293	0.0141794015711615	0.0134698878578438
920	NC_037328.1:150997685:150997752	NC_037328.1	150997685	150997752	chr1	chr1:150997685:150997752	5	CpG-deserts;inter	68	NA	NA	NA	NA	NA	NA	0.451709401709402	0.671890547263682	0.730654761904762	0.710144927536232	0.0849673202614379	0.328921568627451	0.122295754479663	0.269378568291612	-0.439709106688479	0.0023564619337292	0.0681413139105398	0.0201007161497266	0.0398033234169263	0.0185427843547444	0.0175314007568216
921	NC_037328.1:151012032:151012083	NC_037328.1	151012032	151012083	chr1	chr1:151012032:151012083	NA	CpG-deserts;inter	52	NA	NA	NA	NA	NA	NA	0.60267094017094	0.67010582010582	0.652564102564103	0.33881626724764	0.0265246449456976	0.223152709359606	0.0128205128205128	0.364400584795322	-0.409314669541841	0.011739238614594	0.0702239980173827	0.0350260636450424	0.067379629764874	0.0324134290459985	0.030289129166921
922	NC_037328.1:151074087:151074141	NC_037328.1	151074087	151074141	chr1	chr1:151074087:151074141	NA	CpG-deserts;inter	55	NA	NA	NA	NA	NA	NA	0.508169934640523	0.645481220657277	0.287770236299648	0.39508547008547	0.965789473684211	0.634126984126984	0.841033138401559	0.779817019400353	0.346064938482547	0.0155644323194095	0.0524432444799116	0.0376482775832115	0.0760843383685799	0.0342766881739986	0.0344043651826796
923	NC_037328.1:151074185:151074293	NC_037328.1	151074185	151074293	chr1	chr1:151074185:151074293	3	repeats;CpG-deserts;inter	109	NA	NA	NA	NA	NA	NA	0.224242424242424	0.450918964076859	0.130686517783292	0.102380952380952	0.995098039215686	0.788167388167388	0.614102564102564	0.856093189964158	0.586308080741567	0.00193552866689178	0.119665836048121	0.0196469378384444	0.0380583235199585	0.0178948047112715	0.0167355462404804
924	NC_037328.1:151114080:151114143	NC_037328.1	151114080	151114143	chr1	chr1:151114080:151114143	NA	CpG-deserts;inter	64	NA	NA	NA	NA	NA	NA	0.360882292310864	0.0365209636042969	0.0706484960371576	0.119047619047619	0.829829478310717	0.384730856799109	0.663751407937454	0.838987435823136	0.53254995196762	0.00793416942440701	0.109564682498005	0.0307592317139793	0.0577136351948232	0.0273985294689414	0.0257458796861861
925	NC_037328.1:151115244:151115322	NC_037328.1	151115244	151115322	chr1	chr1:151115244:151115322	6	CpG-deserts;inter	79	NA	NA	NA	NA	NA	NA	0.666666666666667	0.4	0.333333333333333	0.5	0	0	0.2	0	-0.425	0.00403019225494389	0.0649007936507937	0.0234781803496345	0.0464524473278902	0.0213655054936549	0.0205211855719192
926	NC_037328.1:151115280:151115322	NC_037328.1	151115280	151115322	chr1	chr1:151115280:151115322	NA	CpG-deserts;inter	43	NA	NA	NA	NA	NA	NA	0.344854440092535	0.728968253968254	0.482072829131653	0.675775613275613	0.193115177105325	0.323845667299178	0.0287037037037037	0.0795405982905983	-0.401616497517313	0.0124759828219235	0.0669269325026856	0.0357757953430267	0.0691401425681332	0.0331169876585852	0.0311112850373717
927	NC_037328.1:151164143:151164204	NC_037328.1	151164143	151164204	chr1	chr1:151164143:151164204	3	transcripts;first intron;CpG-shores;genes	62	NA	ETS2	NA	NA	NA	NA	0.608952427500815	0.585978835978836	0.329059829059829	0.518978198056212	0.98053424268258	0.78135671132125	0.895198592257416	0.801058743169399	0.353794749708738	0.00508785094736666	0.0462953583801582	0.0254626432579061	0.0496635850491745	0.0218606968446014	0.0220086351898286
928	NC_037328.1:151167871:151167939	NC_037328.1	151167871	151167939	chr1	chr1:151167871:151167939	1	transcripts;introns;repeats;CpG-deserts;genes	69	NA	ETS2	NA	NA	NA	NA	0.406067251461988	0.448484848484848	0.369126840088728	0.32844868173258	0.985574229691877	0.681294563279857	0.925767543859649	0.775541125541126	0.454012460151091	0.00422003546320291	0.0682879420522195	0.0236072941411649	0.0469997428570859	0.0216572599164741	0.0207735412122339
929	NC_037328.1:151170076:151170131	NC_037328.1	151170076	151170131	chr1	chr1:151170076:151170131	NA	transcripts;CDS;exons;introns;CpG-deserts;genes	56	NA	ETS2	NA	NA	NA	NA	0.365266106442577	0.26025641025641	0.541717541717542	0.533267457180501	0.868548588887572	0.768980233602875	0.814072001105583	0.745163584637269	0.374064223159067	0.00741339728566457	0.0492521440399233	0.028358650327208	0.0563821525756032	0.0245017277385262	0.025118046939577
930	NC_037328.1:151172528:151172539	NC_037328.1	151172528	151172539	chr1	chr1:151172528:151172539	NA	transcripts;introns;CpG-shelves;genes	12	NA	ETS2	NA	NA	NA	NA	0.727640359151731	0.530087337924666	0.611111111111111	0.610831029435681	0.947743055555555	0.680349710195666	0.888949275362319	0.841326530612245	0.219674683525649	0.0235206922237966	0.0222630898437897	0.056494953645645	0.0929529863884701	0.0351920480546762	0.0425397389387626
931	NC_037328.1:151186023:151186049	NC_037328.1	151186023	151186049	chr1	chr1:151186023:151186049	NA	CpG-deserts;inter	27	NA	NA	NA	NA	NA	NA	0.684533977974752	0.863985303275626	0.927397096526879	0.763216783216783	0.340570048309179	0.718418066054975	0.296060606060606	0.310311688311688	-0.393443188064398	0.021371488217347	0.0667033084244029	0.0463401856801256	0.0887086732879567	0.0434490699464271	0.0404748076811578
932	NC_037328.1:151225246:151225297	NC_037328.1	151225246	151225297	chr1	chr1:151225246:151225297	NA	CpG-deserts;inter	52	NA	NA	NA	NA	NA	NA	0.420684684684685	0.233696931723247	0.135211038961039	0.210232558139535	0.909205325140809	0.444857142857143	0.850660643704122	0.656530612244898	0.465357127609616	0.0131653217524134	0.0871123528004765	0.0376474946622551	0.0708002096220017	0.0335382708217565	0.0318904382560094
933	NC_037328.1:151225370:151225410	NC_037328.1	151225370	151225410	chr1	chr1:151225370:151225410	0	CpG-deserts;inter	41	NA	NA	NA	NA	NA	NA	0.343472222222222	0.362358581450497	0.282824438521457	0.22755440654422	0.868920068027211	0.518611111111111	0.778462188058247	0.737500641328771	0.421821089946736	0.00635774236987657	0.0619204207682612	0.0271933744164674	0.0534937933643837	0.0249460805332604	0.023777779086074
934	NC_037328.1:151229973:151230022	NC_037328.1	151229973	151230022	chr1	chr1:151229973:151230022	NA	repeats;CpG-deserts;inter	50	NA	NA	NA	NA	NA	NA	0.507384367517734	0.311763337893297	0.299586563307494	0.525700483091787	1	0.549359649122807	0.920680801325963	0.698923076923077	0.381132193890384	0.0253390332063668	0.0660843767584322	0.0507970342329404	0.0966672944755344	0.048278217144703	0.0443453982764781
935	NC_037328.1:151230191:151230246	NC_037328.1	151230191	151230246	chr1	chr1:151230191:151230246	6	repeats;CpG-deserts;inter	56	NA	NA	NA	NA	NA	NA	0.460361067503925	0.26099695868259	0.342521994134897	0.211428571428571	0.974431818181818	0.729784366576819	0.710597057159027	0.60096585804133	0.435117627052253	0.00524885394761591	0.0698009450164039	0.025638018513347	0.0501744463856042	0.0232089606937476	0.0222423649350099
936	NC_037328.1:151231950:151231970	NC_037328.1	151231950	151231970	chr1	chr1:151231950:151231970	8	CpG-deserts;inter	21	NA	NA	NA	NA	NA	NA	0.468060449986446	0.198430069370719	0.246220657276995	0.232232462877624	0.749305887564201	0.570824036875714	0.785557823518565	0.600815128367311	0.390389809203502	0.00316530852175137	0.0548836971273065	0.020964034777535	0.0433087352626316	0.0189708050313282	0.0191055833726247
937	NC_037328.1:151253248:151253286	NC_037328.1	151253248	151253286	chr1	chr1:151253248:151253286	1	CpG-deserts;inter	39	NA	NA	NA	NA	NA	NA	0.704582651391162	0.663869372885766	0.766146848602989	0.78725845410628	0.996598639455782	0.91823780794369	1	1	0.248244780103319	0.000590503668542407	0.0196768462278742	0.0182207325910391	0.0304453901531846	0.0134685358546674	0.0133489709600717
938	NC_037328.1:151254692:151254743	NC_037328.1	151254692	151254743	chr1	chr1:151254692:151254743	5	CpG-deserts;inter	52	NA	NA	NA	NA	NA	NA	0.510876623376623	0.935483870967742	0.770669631826044	0.717105263157895	0.037793427230047	0.33452380952381	0.154285714285714	0.0372200263504611	-0.592578102984568	0.00214987494768239	0.121908068483369	0.0214690414583545	0.039101190838488	0.0194862288450643	0.0172079810450257
939	NC_037328.1:151275680:151275703	NC_037328.1	151275680	151275703	chr1	chr1:151275680:151275703	NA	CpG-shelves;repeats;inter	24	NA	NA	NA	NA	NA	NA	0.311428571428571	0.898217468805704	0.754873769790329	0.839540229885057	0.00476190476190476	0.31001911001911	0.00303030303030303	0.0557692307692308	-0.607619872832278	0.0119027145644051	0.145074790390169	0.0429164696967583	0.0677702519507118	0.0361141823748973	0.0304792816886241
[truncated: 52,159 more rows]
