# Supplementary material for: Genome-Wide DNA Methylation and Transcriptome Integration Associates DNA Methylation Changes with Bovine Subclinical Mastitis Caused by Staphylococcus chromogenes
Source: Int J Mol Sci. 2023 Jun 20;24(12):10369. doi: 10.3390/ijms241210369 (PMC10299661; doi:10.3390/ijms241210369)
Supplement: Supplementary file 1 [file ijms-24-10369-s001.zip › TableS9 Functional enrichment for genes harboring dMHBs in their promoters, first exons andor first in-trons.xlsx]

## Sheet: TableS9_dMHBs_promoterFEFI
Table S9 Functional enrichment for genes harboring dMHBs in their promoters, first exons and/or first in-trons
	ONTOLOGY	ID	Description	GeneRatio	BgRatio	pvalue	p.adjust	qvalue	geneID	Count
GO:0003008	BP	GO:0003008	system process	83/950	217/3822	4.70483e-06	0.00508189	0.00452517	ABCC1/ABCG2/ACTA2/ADORA2B/ADRA1A/AGT/APP/ASB2/ATP2B4/CCL3/CHRM3/CHRND/CLDN4/CLIC5/CXADR/EDN1/EDNRB/EMP2/EXT1/F2R/F2RL1/FBXO32/FYN/GCLM/GNAS/GPR4/GRAP/GRK2/GTF2IRD2/HMGCR/HRH1/ID2/INHBA/KCNJ2/KCNMA1/KIT/LDLR/LMCD1/LPCAT3/MAP2K6/MEF2A/MEF2C/MTG1/MTMR2/NOD2/OPA3/P2RX4/P2RY2/PDCL/PDE6D/PRKAG3/PRKCA/PRKG1/REEP6/RETREG1/RHOA/RHPN2/RIPOR2/ROCK2/RP1/S100B/SCARB1/SCN4B/SCNN1A/SCNN1B/SCNN1G/SCO2/SERPINF2/S…	83
GO:0016477	BP	GO:0016477	cell migration	84/950	222/3822	6.77575e-06	0.00508189	0.00452517	ABHD2/ABHD6/ACTG1/ADAM10/AGT/ATP2B4/B4GALT1/CCL3/CD44/CD81/CD9/CLDN4/CORO1A/CTNNB1/CX3CR1/CXADR/CXCL17/CYRIB/EDN1/EDNRB/EFNA1/ELMO2/EMP2/EXT1/F2R/F2RL1/FAM83D/FBXW7/FERMT3/FGF1/FGF2/FUT1/FYN/GATA3/GRB7/HACE1/HMGB1/HRH1/HSPB1/IL34/ITGAL/ITGB1/JCAD/KIT/LIMD1/LOXL2/LYVE1/MAPK1/MAPRE2/MET/MIEN1/MMP14/MPP1/MSTN/NOD2/NR4A1/P2RX4/PAK1/PHACTR4/PLCG1/PRKCA/PRKG1/PTPRF/RAB25/RAC2/RAPGEF2/RHBDF1/RHOA/RHOC/R…	84
GO:0030334	BP	GO:0030334	regulation of cell migration	60/950	146/3822	8.0183e-06	0.00508189	0.00452517	ABHD2/ABHD6/ACTG1/ADAM10/AGT/ATP2B4/CCL3/CD81/CD9/CLDN4/CORO1A/CXCL17/CYRIB/EDN1/EFNA1/EMP2/F2R/F2RL1/FBXW7/FERMT3/FGF1/FGF2/FUT1/GATA3/GRB7/HACE1/HSPB1/IL34/ITGB1/JCAD/LYVE1/MAPK1/MAPRE2/MET/MIEN1/MPP1/MSTN/NOD2/P2RX4/PAK1/PLCG1/PRKCA/PRKG1/RAB25/RAC2/RAPGEF2/RHOA/RHOC/RIPOR2/RNF20/SLC9A3R1/SPRY2/STK10/SVBP/SYNJ2BP/TBXA2R/TEK/TGFB2/TMEM102/WASL	60
GO:0030335	BP	GO:0030335	positive regulation of cell migration	40/950	86/3822	8.48749e-06	0.00508189	0.00452517	ACTG1/ADAM10/AGT/CCL3/CLDN4/CORO1A/CXCL17/EDN1/F2R/F2RL1/FERMT3/FGF1/FGF2/FUT1/GATA3/GRB7/HSPB1/IL34/ITGB1/JCAD/LYVE1/MAPK1/MAPRE2/MET/MIEN1/MSTN/P2RX4/PAK1/PLCG1/PRKCA/RAB25/RAC2/RAPGEF2/RHOA/RHOC/RIPOR2/SPRY2/TEK/TGFB2/TMEM102	40
GO:0016192	BP	GO:0016192	vesicle-mediated transport	104/950	291/3822	1.06914e-05	0.00512119	0.00456017	ACTG1/ADORA2B/AGT/ANXA2/AP2A2/ARF1/ARF3/ARRB1/ATP2C1/ATP6AP1/CCL3/CD302/CD81/CD9/CDC42SE1/CDC42SE2/CLU/COG7/COPZ1/CORO1A/CORO7/CTNNB1/DNM2/DYNLT1/ELMO2/ELMO3/EMP2/EXOC8/FCER1G/GAPVD1/GHR/GRK2/GRK3/HMGB1/HOOK3/INSIG1/ITGAL/ITGB1/ITGB2/KDELR2/KIT/LAMP1/LAPTM4B/LDLR/LIN7A/LOXL2/LOXL4/LYST/MAL2/MARCHF3/MIA3/MICAL1/MICALL1/MYO1D/NAPA/NCF2/NOD2/PACSIN1/PAK1/PIGR/PLA2G3/PLPP3/PPP3R1/PPT1/PTGDS/RAB15/RAB…	104
GO:0032879	BP	GO:0032879	regulation of localization	142/950	427/3822	2.12836e-05	0.00609999	0.00543175	ABHD2/ABHD6/ACAA2/ACTG1/ACTN1/ADAM10/ADORA2B/AGT/ANXA2/ARF1/ARRB1/ATP1A1/ATP2B4/ATP2C1/CAPN3/CCL3/CCT7/CD81/CD9/CELA2A/CFAP20/CLDN4/CLIC5/CLU/COA8/CORO1A/CPSF6/CRYAB/CTNNB1/CXCL17/CYRIB/EDN1/EFNA1/EMP2/F2R/F2RL1/FBXW7/FERMT3/FGF1/FGF2/FUT1/FXYD1/FYN/GAPVD1/GATA3/GDI2/GOLPH3L/GRB7/GRK2/HACE1/HMGCR/HSPB1/IER3IP1/IL34/INHBA/INSIG1/IP6K3/ITGB1/JCAD/KCNAB1/KCNMA1/LAMP1/LETM1/LIMK2/LPCAT3/LYVE1/LZTFL1/…	142
GO:0035150	BP	GO:0035150	regulation of tube size	17/950	27/3822	2.89695e-05	0.00609999	0.00543175	ACTA2/ADORA2B/AGT/EDN1/EDNRB/EXT1/F2R/F2RL1/GCLM/HRH1/KCNMA1/P2RY2/PRKG1/RHOA/SCNN1B/SERPINF2/ZDHHC21	17
GO:0035296	BP	GO:0035296	regulation of tube diameter	17/950	27/3822	2.89695e-05	0.00609999	0.00543175	ACTA2/ADORA2B/AGT/EDN1/EDNRB/EXT1/F2R/F2RL1/GCLM/HRH1/KCNMA1/P2RY2/PRKG1/RHOA/SCNN1B/SERPINF2/ZDHHC21	17
GO:0097746	BP	GO:0097746	blood vessel diameter maintenance	17/950	27/3822	2.89695e-05	0.00609999	0.00543175	ACTA2/ADORA2B/AGT/EDN1/EDNRB/EXT1/F2R/F2RL1/GCLM/HRH1/KCNMA1/P2RY2/PRKG1/RHOA/SCNN1B/SERPINF2/ZDHHC21	17
GO:0040017	BP	GO:0040017	positive regulation of locomotion	41/950	93/3822	3.25939e-05	0.00609999	0.00543175	ACTG1/ADAM10/AGT/CCL3/CFAP20/CLDN4/CORO1A/CXCL17/EDN1/F2R/F2RL1/FERMT3/FGF1/FGF2/FUT1/GATA3/GRB7/HSPB1/IL34/ITGB1/JCAD/LYVE1/MAPK1/MAPRE2/MET/MIEN1/MSTN/P2RX4/PAK1/PLCG1/PRKCA/RAB25/RAC2/RAPGEF2/RHOA/RHOC/RIPOR2/SPRY2/TEK/TGFB2/TMEM102	41
GO:0044057	BP	GO:0044057	regulation of system process	35/950	76/3822	4.04618e-05	0.00609999	0.00543175	ADORA2B/ADRA1A/AGT/ATP2B4/CCL3/CHRM3/CXADR/EDN1/EDNRB/EMP2/F2R/F2RL1/FBXO32/GRK2/GTF2IRD2/HRH1/INHBA/KCNJ2/KCNMA1/LMCD1/LPCAT3/MEF2A/MTG1/MTMR2/P2RX4/PRKAG3/PRKCA/PRKG1/RHOA/SCN4B/SLC8A1/SLC9A3R1/TBXA2R/TGFB2/ZDHHC21	35
GO:0051241	BP	GO:0051241	negative regulation of multicellular organismal process	55/950	137/3822	4.26288e-05	0.00609999	0.00543175	ABHD6/ADCY7/ADORA2B/ANXA2/ANXA4/ATP2B4/CCL3/CD9/CTNNB1/DYNLT1/EFNA1/ELAPOR2/F2R/FBXW7/FGF2/GNAS/GPR4/GRK2/HMGCR/HSP90AB1/IL10/INHBA/KCNMA1/LAPTM4B/LDLR/LGR4/LOXL2/LTF/MAP2K6/MEF2C/MTMR2/NAXE/NFIB/NOD2/NR1D1/P2RX4/PPM1B/PRDX2/PRKG1/RAPGEF2/RHOA/S100B/SERPINF2/SERPING1/SLC6A4/SPRY1/SPRY2/SVBP/SYNJ2BP/TBXA2R/TEK/TGFB2/THBS2/YWHAH/ZNF750	55
GO:0051674	BP	GO:0051674	localization of cell	88/950	245/3822	4.32985e-05	0.00609999	0.00543175	ABHD2/ABHD6/ACTG1/ADAM10/AGT/ATP2B4/B4GALT1/CCL3/CD44/CD81/CD9/CFAP20/CLDN4/CORO1A/CTNNB1/CX3CR1/CXADR/CXCL17/CYRIB/DPCD/EDN1/EDNRB/EFNA1/ELMO2/EMP2/EXT1/F2R/F2RL1/FAM83D/FBXW7/FERMT3/FGF1/FGF2/FUT1/FYN/GATA3/GRB7/HACE1/HMGB1/HRH1/HSPB1/IL34/ITGAL/ITGB1/JCAD/KIT/KLC3/LIMD1/LOXL2/LYVE1/MAPK1/MAPRE2/MET/MIEN1/MMP14/MPP1/MSTN/NOD2/NR4A1/P2RX4/PAK1/PHACTR4/PLCG1/PRKCA/PRKG1/PTPRF/RAB25/RAC2/RAPGEF2/R…	88
GO:0014065	BP	GO:0014065	phosphatidylinositol 3-kinase signaling	14/950	21/3822	6.03999e-05	0.00761356	0.00677951	AGT/CSF3/EDN1/F2R/F2RL1/FBXL2/FGF2/GATA3/PIK3R1/PIK3R2/RPS6KB1/SLC9A3R1/TEK/TGFB2	14
GO:0040011	BP	GO:0040011	locomotion	94/950	268/3822	6.80183e-05	0.00814519	0.0072529	ABHD2/ABHD6/ACTG1/ADAM10/AGT/ALCAM/ATP2B4/B4GALT1/CCL3/CD44/CD81/CD9/CFAP20/CLDN4/CMTM8/CORO1A/CTNNB1/CX3CR1/CXADR/CXCL17/CYRIB/DEFB13/DPCD/EBD/EDN1/EDNRB/EFNA1/ELMO2/EMP2/EXT1/F2R/F2RL1/FAM83D/FBXW7/FERMT3/FGF1/FGF2/FUT1/FYN/GATA3/GRB7/HACE1/HMGB1/HRH1/HSPB1/IL34/ITGAL/ITGB1/JCAD/KIT/KLC3/LIMD1/LOXL2/LYVE1/MAPK1/MAPRE2/MET/MIEN1/MMP14/MPP1/MSTN/NFIB/NOD2/NR4A1/P2RX4/PAK1/PGF/PHACTR4/PLCG1/PRKCA/…	94
GO:0006928	BP	GO:0006928	movement of cell or subcellular component	99/950	287/3822	9.13926e-05	0.0102541	0.00913077	ABHD2/ABHD6/ACTG1/ADAM10/AGT/ALCAM/AP3D1/AP3M1/ATP2B4/B4GALT1/BLOC1S1/CCL3/CD44/CD81/CD9/CFAP20/CLDN4/CORO1A/CTNNB1/CX3CR1/CXADR/CXCL17/CYRIB/DPCD/EDN1/EDNRB/EFNA1/ELMO2/EMP2/EXT1/F2R/F2RL1/FAM83D/FBXW7/FERMT3/FGF1/FGF2/FUT1/FYN/GATA3/GRB7/HACE1/HMGB1/HRH1/HSPB1/IL34/ITGAL/ITGB1/JCAD/KCNJ2/KIF3C/KIT/KLC3/LAMP1/LIMD1/LOXL2/LYVE1/MAPK1/MAPRE2/MET/MIEN1/MMP14/MPP1/MSTN/MYH10/NFIB/NOD2/NR4A1/P2RX4/PA…	99
GO:0061024	BP	GO:0061024	membrane organization	58/950	150/3822	9.41921e-05	0.0102541	0.00913077	ABCC1/ACAA2/AFG3L2/ANO4/ATP2C1/ATP8A1/BAIAP2/BCL2/CD9/CHCHD6/CHMP4A/CORO1A/CTDNEP1/DEGS1/EMC3/EMC6/EMC7/EMP2/EYA2/GET4/GLTP/HACE1/INSIG1/LAPTM4B/LAPTM5/LPCAT3/MIA3/MICALL1/NAIF1/NAXE/NDRG1/NUP93/PACSIN1/PPIF/PPT1/PRELID1/RAB7A/RHOA/RILPL2/RUBCNL/S100A10/SAMM50/SEPTIN8/SLC25A5/SLC9A3R1/SPAST/STARD5/STXBP6/SYNGR2/TGFB2/TMED10/TMEM102/TMEM95/VAPB/VMP1/WASL/WDR83OS/YKT6	58
GO:0060326	BP	GO:0060326	cell chemotaxis	26/950	54/3822	0.000161164	0.0142959	0.0127298	ADAM10/CCL3/CORO1A/CX3CR1/CXADR/CXCL17/EDNRB/ELMO2/FGF1/FGF2/HMGB1/HRH1/HSPB1/IL34/KIT/MAPK1/MET/MPP1/MSTN/NOD2/NR4A1/P2RX4/RAC2/RIPOR2/TMEM102/VAV1	26
GO:0009653	BP	GO:0009653	anatomical structure morphogenesis	126/950	387/3822	0.00019299	0.0165075	0.0146991	ACTA2/ACTG1/ACTN1/AFG3L2/AGT/ALCAM/ALPL/ANGPTL4/ANPEP/ANXA2/ARHGAP15/ATP2B4/B4GALT1/BAIAP2/C1GALT1/CAPN3/CAPRIN1/CAPZB/CCL3/CD44/CD53/CD81/CD9/CDC42SE1/CDC42SE2/CLDN4/CNP/COL4A1/CORO1A/CRISPLD2/CTNNB1/CXCL17/CYRIB/DNM2/EDN1/EFNA1/EIF4A3/EMP2/EXT1/FBXW7/FERMT3/FGF1/FGF2/FHL2/FSCN2/FUT1/FYN/GATA3/GNAS/GPR4/HSPB1/ID2/INHBA/INSIG1/ITGB1/JCAD/KIT/LDLR/LGR4/LIMD1/LOXL2/LTF/MAPK1/MARCHF5/MEF2A/MEF2C/MMP…	126
GO:0070372	BP	GO:0070372	regulation of ERK1 and ERK2 cascade	21/950	41/3822	0.000232342	0.0189698	0.0168917	APIP/CCL3/CXCL17/DSTYK/F2R/F2RL1/FAM83D/FBXW7/FGF1/FGF2/NOD2/PRKCA/RAP1A/RAPGEF2/SERPINF2/SLC9A3R1/SPRY1/SPRY2/SYNJ2BP/TEK/YWHAZ	21
GO:0030036	BP	GO:0030036	actin cytoskeleton organization	46/950	116/3822	0.000253171	0.0189698	0.0168917	ACTA2/ACTG1/ACTN1/ARF1/ARFGEF1/ASB2/ATP2C1/BAIAP2/CAP1/CAPN3/CAPZB/CDC42EP2/CNN3/CORO1A/CORO7/CSF3/CXADR/CYRIA/CYRIB/DSTN/EDN1/EMP2/EZR/FSCN2/KIT/MEF2A/MICAL1/MYH10/PACSIN1/PAK1/PDLIM4/PDXP/PHACTR4/PIK3R2/RASA1/RHOA/RHOC/RHPN2/ROCK2/S100A10/SERPINF2/SLC9A3R1/TCAP/TEK/VASP/WASL	46
GO:0006939	BP	GO:0006939	smooth muscle contraction	14/950	23/3822	0.000253459	0.0189698	0.0168917	ACTA2/ADORA2B/ATP2B4/CHRM3/EDN1/EDNRB/F2R/KCNMA1/PRKG1/RHOA/ROCK2/SCNN1B/TBXA2R/ZDHHC21	14
GO:0048468	BP	GO:0048468	cell development	88/950	258/3822	0.000354458	0.0240802	0.0214422	ACTA2/ACTG1/ACTN1/AFG3L2/ALCAM/ANXA2/ASB2/ATP6AP1/B4GALT1/BFSP2/BLOC1S1/C1GALT1/CAPN3/CAPRIN1/CDH2/CNP/CTNNB1/CXADR/DNM2/DYNLT1/EDN1/EDNRB/EFNA1/EXT1/FBXW7/FERMT3/FGF2/FHL2/FSCN2/FYN/GPR4/IL34/ITM2C/KCNMA1/KIT/KLC3/LDLR/LIMD1/LTF/MAEA/MAPK1/MEF2A/MEF2C/MICALL1/MTMR2/NDRG1/NFIB/NR1D1/NRROS/PACSIN1/PHACTR4/PIK3R1/PLA2G3/PPP3R1/PRKACA/PRKG1/QKI/RAB11A/RAB25/RAP1A/RAP1B/RAPGEF2/RFX2/RHOA/RILPL2/RIPOR…	88
GO:0050920	BP	GO:0050920	regulation of chemotaxis	18/950	34/3822	0.000383818	0.0248444	0.0221227	ADAM10/CCL3/CXCL17/CYRIB/F2RL1/FGF1/FGF2/HSPB1/IL34/MAPK1/MET/MPP1/MSTN/NOD2/P2RX4/RAC2/RIPOR2/TMEM102	18
GO:0072006	BP	GO:0072006	nephron development	13/950	22/3822	0.000635814	0.0346085	0.0308172	ACTA2/AGT/BASP1/CTNNB1/EDNRB/EGR1/EXT1/FGF1/FGF2/GATA3/GPR4/LGR4/MEF2C	13
GO:0006935	BP	GO:0006935	chemotaxis	37/950	92/3822	0.000732233	0.0373127	0.0332252	ADAM10/ALCAM/CCL3/CMTM8/CORO1A/CX3CR1/CXADR/CXCL17/CYRIB/DEFB13/EBD/EDN1/EDNRB/ELMO2/EXT1/F2RL1/FGF1/FGF2/HMGB1/HRH1/HSPB1/IL34/KIT/MAPK1/MET/MPP1/MSTN/NFIB/NOD2/NR4A1/P2RX4/PGF/RAC2/RHOA/RIPOR2/TMEM102/VAV1	37
GO:0042330	BP	GO:0042330	taxis	37/950	92/3822	0.000732233	0.0373127	0.0332252	ADAM10/ALCAM/CCL3/CMTM8/CORO1A/CX3CR1/CXADR/CXCL17/CYRIB/DEFB13/EBD/EDN1/EDNRB/ELMO2/EXT1/F2RL1/FGF1/FGF2/HMGB1/HRH1/HSPB1/IL34/KIT/MAPK1/MET/MPP1/MSTN/NFIB/NOD2/NR4A1/P2RX4/PGF/RAC2/RHOA/RIPOR2/TMEM102/VAV1	37
GO:0043542	BP	GO:0043542	endothelial cell migration	22/950	47/3822	0.000832473	0.0410592	0.0365612	AGT/ATP2B4/EFNA1/EMP2/FBXW7/FGF1/FGF2/FUT1/GATA3/HSPB1/JCAD/LOXL2/MET/NR4A1/P2RX4/PRKCA/RHOA/SCARB1/SVBP/SYNJ2BP/TBXA2R/TEK	22
GO:0030029	BP	GO:0030029	actin filament-based process	47/950	125/3822	0.000893063	0.0410592	0.0365612	ACTA2/ACTG1/ACTN1/ARF1/ARFGEF1/ASB2/ATP2C1/BAIAP2/CAP1/CAPN3/CAPZB/CDC42EP2/CNN3/CORO1A/CORO7/CSF3/CXADR/CYRIA/CYRIB/DSTN/EDN1/EMP2/EZR/FSCN2/KCNJ2/KIT/MEF2A/MICAL1/MYH10/PACSIN1/PAK1/PDLIM4/PDXP/PHACTR4/PIK3R2/RASA1/RHOA/RHOC/RHPN2/ROCK2/S100A10/SERPINF2/SLC9A3R1/TCAP/TEK/VASP/WASL	47
GO:0090130	BP	GO:0090130	tissue migration	28/950	65/3822	0.000906083	0.0410592	0.0365612	ACTA2/AGT/ATP2B4/EFNA1/EMP2/FBXW7/FGF1/FGF2/FUT1/GATA3/HSPB1/JCAD/KIT/LOXL2/MAPRE2/MET/NR4A1/P2RX4/PLCG1/PRKCA/RAB25/RHOA/SCARB1/SVBP/SYNJ2BP/TBXA2R/TEK/TGFB2	28
GO:0010631	BP	GO:0010631	epithelial cell migration	27/950	62/3822	0.000910005	0.0410592	0.0365612	AGT/ATP2B4/EFNA1/EMP2/FBXW7/FGF1/FGF2/FUT1/GATA3/HSPB1/JCAD/KIT/LOXL2/MAPRE2/MET/NR4A1/P2RX4/PLCG1/PRKCA/RAB25/RHOA/SCARB1/SVBP/SYNJ2BP/TBXA2R/TEK/TGFB2	27
GO:0090132	BP	GO:0090132	epithelium migration	27/950	62/3822	0.000910005	0.0410592	0.0365612	AGT/ATP2B4/EFNA1/EMP2/FBXW7/FGF1/FGF2/FUT1/GATA3/HSPB1/JCAD/KIT/LOXL2/MAPRE2/MET/NR4A1/P2RX4/PLCG1/PRKCA/RAB25/RHOA/SCARB1/SVBP/SYNJ2BP/TBXA2R/TEK/TGFB2	27
GO:0061005	BP	GO:0061005	cell differentiation involved in kidney development	9/950	13/3822	0.00092576	0.0410592	0.0365612	ACTA2/BASP1/CTNNB1/EDNRB/EXT1/GATA3/GPR4/LGR4/MEF2C	9
GO:0071622	BP	GO:0071622	regulation of granulocyte chemotaxis	8/950	11/3822	0.0011209	0.0455011	0.0405166	CXCL17/IL34/MAPK1/MPP1/MSTN/NOD2/RAC2/RIPOR2	8
GO:1905517	BP	GO:1905517	macrophage migration	8/950	11/3822	0.0011209	0.0455011	0.0405166	CCL3/CD81/CD9/CXCL17/EDNRB/IL34/MAPK1/MSTN	8
GO:0008202	BP	GO:0008202	steroid metabolic process	25/950	57/3822	0.00123358	0.0483477	0.0430513	AGT/ASAH1/CYB5R3/CYP11A1/DHCR7/DHRS11/EDNRB/EGR1/ERLIN2/FGF1/GBA/HMGCR/HSD17B12/INSIG1/KCNMA1/LDLR/LIPE/LPCAT3/NFE2L1/NR1D1/SCARB1/SCNN1B/SULT1A1/TECR/YWHAH	25
GO:0098590	CC	GO:0098590	plasma membrane region	83/985	210/4051	3.77302e-07	0.000138092	0.000112793	ABCC1/ABCG2/ABHD17A/ABHD17C/ABHD6/ADRA1A/ANXA2/ANXA4/AP1S1/AP2A2/APP/ARRB1/ATP1A1/B4GALT1/CD44/CD81/CFAP126/CHRM3/CHRND/CLIC5/CLTB/CTNNB1/CTSB/CXADR/DAG1/DNM2/DSTYK/EMP2/EZR/F2R/FOLR3/FXYD1/GABRP/ITGB1/KCNMA1/LAMP1/LDLR/LIN7A/LIPE/MAL2/MAPK1/MASTL/MXRA8/MYH10/MYO10/MYO1C/MYO1D/NOD2/OSCP1/PACSIN1/PAK1/PDE6D/PDLIM4/PDXP/PLPP2/PLPP3/PPP1CC/PRKACA/RAB11A/RAB18/RAB25/RASGRP2/RHOA/RHOC/RIPOR2/SCNN1A/SC…	83
GO:0031982	CC	GO:0031982	vesicle	155/985	462/4051	1.2046e-06	0.000220442	0.000180057	ABHD17A/ABHD17C/ABHD2/ABHD6/ACAP1/ACSBG1/ACTG1/ACTN1/ADAM10/ANXA2/ANXA4/AP1S1/AP2A2/AP3M1/APP/ARRB1/ATP1A1/ATP6V0B/ATP6V1A/ATP8A1/CALCOCO2/CAPG/CD79A/CD81/CD9/CDC42EP2/CDIP1/CHMP4A/CLIC5/CLINT1/CLK3/CLTB/CLU/CNP/COMMD7/COPZ1/CORO1A/CORO7/CRISPLD2/CTSB/CXADR/CYB561/DNAJC5/DNM2/DSE/EMP2/EXOC8/FASN/FOLR3/FURIN/FYN/GABARAP/GAPVD1/GCHFR/GNAS/HMGB1/HSP90AB1/IFNAR1/IGF2R/IST1/ITGB1/ITM2B/ITPR2/KCNMA1/KD…	155
GO:0030054	CC	GO:0030054	cell junction	101/985	290/4051	1.93689e-05	0.0014178	0.00115806	ABHD17A/ABHD17C/ABHD6/ACTG1/ACTN1/ACTN4/ADAM10/ADORA2B/ARF1/B4GALT1/BASP1/BCAR3/CACNB2/CAPRIN1/CD53/CDH2/CHRM3/CHRND/CLDN4/CORO1A/CTBP2/CTNNB1/CXADR/DAG1/DDB2/DLC1/DNAJC5/DNM2/DSTYK/EEF1A2/EXT1/F2R/FBP2/FXYD1/FYN/GABRP/GJA5/GRAP/GRB7/GRK2/HRH1/ITGB1/KCNMA1/LAMP1/LIMD1/LIN7A/MAPK1/MAPRE2/MICAL1/MPP7/MXRA8/NAPA/NCAPH2/NR1D1/P2RX4/PACSIN1/PAK1/PALMD/PDLIM4/PIK3R2/PKP1/PKP3/PPP3CA/PPP3R1/PPT1/PRKACA/…	101
GO:0042995	CC	GO:0042995	cell projection	122/985	383/4051	0.000264839	0.0126447	0.0103282	ABCG2/ABHD17A/ABHD17C/ACTA2/ACTG1/ACTN1/ADAM10/ALCAM/ANKMY2/AP3D1/AP3M1/APP/ARF1/ARRB1/ATP1A1/ATP2B4/B4GALT1/B9D2/BAG2/BAIAP2/BASP1/BLOC1S1/CAPG/CAPN2/CAPRIN1/CD302/CD44/CDC42SE2/CFAP126/CFAP20/COQ6/CORO1A/CTNNB1/CXADR/CYRIB/DNM2/ELOVL5/EXOC8/EZR/F2RL1/FERMT3/FSCN2/FYN/GABARAP/GCHFR/GNB1/GRB7/HSPB1/IQCD/ITGB1/JADE1/KCNMA1/LAPTM4B/MAPK1/MAPT/MICAL1/MPP1/MTMR2/MXRA8/MYH10/MYO10/MYO1C/MYO1D/NFIB/NR1…	122
GO:0031226	CC	GO:0031226	intrinsic component of plasma membrane	43/985	109/4051	0.000276388	0.0126447	0.0103282	ABHD6/ALCAM/CCRL2/CD81/CDH2/CHRND/CLDN4/FCER1G/FOLR3/FXYD1/HRH1/IFNAR1/ITGA2/ITGAL/ITGB1/ITGB2/KCNJ2/KCNMA1/LAPTM5/LGR4/LRRC8C/MAEA/MIEN1/MIGA2/MPZL1/NCF1/NCF2/NOD2/P2RX4/SCARB1/SCN4B/SCNN1A/SLC16A1/SLC2A1/SLC39A14/SLC8A1/STIM1/STRA6/SYNDIG1/TMEM150B/TMEM150C/TYROBP/YKT6	43
GO:0031252	CC	GO:0031252	cell leading edge	33/985	79/4051	0.000418079	0.0139106	0.0113622	ACTA2/ACTN1/BAIAP2/CAPG/CAPRIN1/CD44/CORO1A/CTNNB1/EZR/ITGB1/MYH10/MYO10/MYO1C/MYO1D/PACSIN1/PAK1/PDLIM4/PDXP/PHACTR4/PLCG1/RAC2/RASGRP2/RHOA/RIPOR2/S100B/SLC9A3R1/SNX1/SNX5/SPRY2/SWAP70/TUBG1/VASP/WASL	33
GO:0045121	CC	GO:0045121	membrane raft	30/985	71/4051	0.000600781	0.0169143	0.0138155	ABCG2/ADRA1A/ATP1A1/CD79A/CTNNB1/CXADR/EFHD2/EMP2/ERLIN2/F2R/FXYD1/FYN/KCNMA1/LAMP1/LDLR/LIPE/MAL2/MAPK1/PLPP2/PLPP3/PPT1/PRKACA/S100A10/SERPINH1/SLC2A1/SLC6A4/SLC8A1/STIM1/TEK/TPP1	30
GO:0098857	CC	GO:0098857	membrane microdomain	30/985	71/4051	0.000600781	0.0169143	0.0138155	ABCG2/ADRA1A/ATP1A1/CD79A/CTNNB1/CXADR/EFHD2/EMP2/ERLIN2/F2R/FXYD1/FYN/KCNMA1/LAMP1/LDLR/LIPE/MAL2/MAPK1/PLPP2/PLPP3/PPT1/PRKACA/S100A10/SERPINH1/SLC2A1/SLC6A4/SLC8A1/STIM1/TEK/TPP1	30
GO:0005938	CC	GO:0005938	cell cortex	22/985	49/4051	0.00121569	0.0261731	0.0213781	ACTN1/BFSP2/CD302/CLIC5/CORO1A/CTBP2/CTNNB1/DSTN/EZR/FGF1/LASP1/MAEA/MPP7/MYH10/MYO10/MYO1D/RASAL3/RHOA/SEPTIN6/SEPTIN7/SLC2A1/WASL	22
GO:0045177	CC	GO:0045177	apical part of cell	30/985	74/4051	0.00135582	0.0275683	0.0225176	ABCC1/ABCG2/ACTG1/ANXA4/CD44/CFAP126/CLIC5/CTNNB1/CTSB/DSTYK/EMP2/EZR/FOLR3/FXYD1/KCNMA1/LDLR/MAL2/RAB18/RIPOR2/SCNN1A/SCNN1B/SCNN1G/SEPTIN7/SLC2A1/SLC39A14/SLC44A4/SLC6A4/SNX10/TEK/TUBG1	30
GO:0098588	CC	GO:0098588	bounding membrane of organelle	136/985	455/4051	0.00229643	0.0382043	0.0312051	ABHD17A/ABHD17C/ABHD6/ACAP1/ADAM10/AIFM2/ANXA4/AP1S1/AP2A2/AP3D1/ARFGAP3/ARFGEF1/ATP2C1/ATP6AP1/ATP6V0B/ATP6V0D1/ATP6V1A/ATP6V1F/ATP8A1/BCL2/BLOC1S1/CALCOCO2/CDIP1/CHMP4A/CLTB/COG7/COPZ1/CORO1A/CORO7/CSNK1D/CYB561/CYB5R3/DHCR7/DNAJC11/DNAJC5/DNM2/DSE/EMP2/EXT1/FURIN/GABARAP/GBA/GOLPH3L/GPAM/HACE1/HK1/HMGCR/HPSE/IGF2R/ITM2B/ITM2C/ITPR2/ITPRIP/KDELR2/LAMP1/LAPTM4B/MARCHF3/MARCHF5/MICALL1/MIGA2/MTAR…	136
bta04611	KEGG	bta04611	Platelet activation	46/1305	101/6119	3.68376e-08	1.21196e-05	9.46145e-06	ACTG1/ADCY6/ADCY7/ADCY9/AKT2/APBB1IP/F2R/FCER1G/FCGR2A/FERMT3/FYN/GNAI2/GNAQ/GNAS/ITGA2/ITGA2B/ITGB1/ITPR2/LCP2/LYN/MAPK1/MAPK13/MAPK14/ORAI1/P2RX1/PIK3R1/PIK3R2/PIK3R6/PLA2G4A/PLA2G4F/PLCB2/PPP1CC/PPP1R12A/PRKACA/PRKG1/RAP1A/RAP1B/RASGRP1/RASGRP2/RHOA/ROCK2/STIM1/SYK/TBXA2R/TBXAS1/VASP	46
bta04015	KEGG	bta04015	Rap1 signaling pathway	65/1305	177/6119	1.39311e-06	0.000229166	0.000178904	ACTG1/ADCY6/ADCY7/ADCY9/ADORA2B/AKT2/APBB1IP/CSF1R/CTNNB1/CTNND1/EFNA1/EFNA2/EFNA4/EFNA5/EVL/F2R/FGF1/FGF2/FGFR1/GNAI2/GNAQ/GNAS/IGF1R/ITGA2B/ITGAL/ITGAM/ITGB1/ITGB2/KIT/LAT/LCP2/LPAR2/LPAR3/LPAR5/MAGI3/MAP2K1/MAP2K6/MAPK1/MAPK13/MAPK14/MET/PARD6B/PDGFB/PGF/PIK3R1/PIK3R2/PLCB2/PLCE1/PLCG1/PRKCA/PRKD3/RAC2/RALGDS/RAP1A/RAP1B/RAP1GAP/RAPGEF1/RAPGEF2/RASGRP2/RASSF5/RGS14/RHOA/TEK/VASP/VAV1	65
bta04928	KEGG	bta04928	Parathyroid hormone synthesis, secretion and action	36/1305	87/6119	1.67342e-05	0.00162514	0.00126871	ADCY6/ADCY7/ADCY9/ARRB1/ATF2/BCL2/CDKN1A/CREB3L1/CREB3L2/CREB5/EGR1/FGFR1/GATA3/GNA12/GNAI2/GNAQ/GNAS/HBEGF/ITPR2/JUND/MAP2K1/MAPK1/MEF2A/MEF2C/MEF2D/MMP14/MMP15/PDE4B/PLCB2/PRKACA/PRKCA/RHOA/RXRA/SLC34A2/SLC9A3R1/VDR	36
bta04151	KEGG	bta04151	PI3K-Akt signaling pathway	84/1305	261/6119	1.97586e-05	0.00162514	0.00126871	AKT2/ATF2/BCL2/CDC37/CDK6/CDKN1A/CDKN1B/COL4A1/CREB3L1/CREB3L2/CREB5/CRTC2/CSF1R/CSF3/EFNA1/EFNA2/EFNA4/EFNA5/EIF4EBP1/ERBB2/ERBB3/F2R/FGF1/FGF2/FGFR1/FOXO3/GHR/GNB1/GNG10/GNG12/GNG7/GRB2/GSK3B/HSP90AB1/IFNAR1/IGF1R/IL2RA/IL4R/IL6R/IL7R/ITGA2/ITGA2B/ITGA4/ITGA6/ITGA7/ITGB1/ITGB4/ITGB7/KIT/LAMB2/LAMB3/LAMC1/LPAR2/LPAR3/LPAR5/MAP2K1/MAPK1/MDM2/MET/NR4A1/NTRK2/OSM/PDGFB/PGF/PIK3R1/PIK3R2/PIK3R6/PPP2…	84
bta04972	KEGG	bta04972	Pancreatic secretion	28/1305	63/6119	3.05474e-05	0.00175075	0.00136677	ADCY6/ADCY7/ADCY9/ATP1A1/ATP2A3/ATP2B1/ATP2B2/ATP2B4/CD38/CELA2A/CHRM3/CPA3/GNAQ/GNAS/ITPR2/KCNMA1/KCNQ1/PLA2G12A/PLA2G3/PLCB2/PRKCA/RAB11A/RAB27B/RAP1A/RAP1B/RHOA/SLC12A2/SLC9A1	28
bta04022	KEGG	bta04022	cGMP-PKG signaling pathway	47/1305	127/6119	3.19285e-05	0.00175075	0.00136677	ADCY6/ADCY7/ADCY9/ADRA1A/ADRA1B/AKT2/ATF2/ATP1A1/ATP2A3/ATP2B1/ATP2B2/ATP2B4/CREB3L1/CREB3L2/CREB5/EDNRB/GNA12/GNAI2/GNAQ/GTF2I/ITPR2/KCNMA1/KCNMB1/MAP2K1/MAPK1/MEF2A/MEF2C/MEF2D/NFATC1/PIK3R6/PLCB2/PPIF/PPP1CC/PPP1R12A/PPP3CA/PPP3CC/PPP3R1/PRKCE/PRKG1/RHOA/ROCK2/SLC25A5/SLC25A6/SLC8A1/SLC8A3/TRPC6/VASP	47
bta01210	KEGG	bta01210	2-Oxocarboxylic acid metabolism	11/1305	16/6119	5.98233e-05	0.00281169	0.00219502	AADAT/ACO1/ACO2/BCAT1/GOT1/GOT2/GPT/GPT2/IDH2/IDH3A/IDH3G	11
bta04010	KEGG	bta04010	MAPK signaling pathway	77/1305	247/6119	0.000143436	0.00539659	0.00421298	AKT2/ARRB1/ATF2/CACNA1G/CACNB2/CSF1R/DUSP4/EFNA1/EFNA2/EFNA4/EFNA5/ELK4/ERBB2/ERBB3/FGF1/FGF2/FGFR1/FLNB/GNA12/GNG12/GRB2/HSPB1/IGF1R/IL1R1/JUND/KIT/MAP2K1/MAP2K6/MAP3K1/MAP3K13/MAP3K5/MAP4K1/MAP4K3/MAPK1/MAPK13/MAPK14/MAPKAPK5/MAPT/MEF2C/MET/MKNK2/NFATC1/NR4A1/NTRK2/PAK1/PDGFB/PGF/PLA2G4A/PLA2G4F/PPM1A/PPM1B/PPP3CA/PPP3CC/PPP3R1/PPP5C/PRKACA/PRKCA/PTPN7/RAC2/RAP1A/RAP1B/RAPGEF2/RASA1/RASGRF1/RAS…	77
bta04072	KEGG	bta04072	Phospholipase D signaling pathway	45/1305	127/6119	0.000154833	0.00539659	0.00421298	ADCY6/ADCY7/ADCY9/AGPAT2/AGPAT4/AGT/AKT2/ARF1/CYTH4/DGKA/DGKD/DGKZ/DNM2/F2R/FCER1G/FYN/GAB1/GNA12/GNAS/GRB2/KIT/LPAR2/LPAR3/LPAR5/MAP2K1/MAPK1/PDGFB/PIK3R1/PIK3R2/PIK3R6/PLA2G4A/PLA2G4F/PLCB2/PLCG1/PLPP1/PLPP2/PLPP3/PRKCA/PTK2B/RALGDS/RHEB/RHOA/RRAS2/SHC4/SYK	45
bta04510	KEGG	bta04510	Focal adhesion	55/1305	164/6119	0.00016403	0.00539659	0.00421298	ACTG1/ACTN1/ACTN4/AKT2/BCL2/CAPN2/COL4A1/CTNNB1/ERBB2/FLNB/FYN/GRB2/GSK3B/IGF1R/ITGA2/ITGA2B/ITGA4/ITGA6/ITGA7/ITGB1/ITGB4/ITGB7/LAMB2/LAMB3/LAMC1/MAP2K1/MAPK1/MET/PAK1/PAK4/PAK6/PARVA/PARVB/PARVG/PDGFB/PGF/PIK3R1/PIK3R2/PPP1CC/PPP1R12A/PRKCA/PTEN/PTK2/RAC2/RAP1A/RAP1B/RAPGEF1/RASGRF1/RHOA/ROCK2/SHC4/THBS2/TNC/VASP/VAV1	55
bta00061	KEGG	bta00061	Fatty acid biosynthesis	10/1305	15/6119	0.000195958	0.00586092	0.00457547	ACACA/ACACB/ACSBG1/ACSL1/ACSL3/ACSL5/ACSL6/FASN/MECR/OXSM	10
bta00600	KEGG	bta00600	Sphingolipid metabolism	21/1305	47/6119	0.000271542	0.00610258	0.00476413	ACER3/ARSA/ASAH1/CERS2/CERS5/CERS6/DEGS1/DEGS2/GALC/GBA/GLB1/KDSR/PLPP1/PLPP2/PLPP3/PSAP/SGMS1/SGPL1/SGPP1/SMPD3/SPTLC2	21
bta04666	KEGG	bta04666	Fc gamma R-mediated phagocytosis	35/1305	94/6119	0.000277536	0.00610258	0.00476413	AKT2/ASAP3/BIN1/DNM2/FCGR2A/FCGR2B/FCGR3A/HCK/INPP5D/LAT/LIMK2/LYN/MAP2K1/MAPK1/MARCKSL1/MYO10/NCF1/PAK1/PIK3R1/PIK3R2/PLA2G4A/PLA2G4F/PLCG1/PLPP1/PLPP2/PLPP3/PRKCA/PRKCE/PTPRC/RAC2/RPS6KB1/SYK/VASP/VAV1/WASF2	35
bta04670	KEGG	bta04670	Leukocyte transendothelial migration	35/1305	94/6119	0.000277536	0.00610258	0.00476413	ACTG1/ACTN1/ACTN4/CD99/CLDN4/CLDN8/CTNNB1/CTNND1/EZR/GNAI2/ITGA4/ITGAL/ITGAM/ITGB1/ITGB2/JAM3/MAPK13/MAPK14/NCF1/NCF2/PIK3R1/PIK3R2/PLCG1/PRKCA/PTK2/PTK2B/RAC2/RAP1A/RAP1B/RASSF5/RHOA/RHOH/ROCK2/VASP/VAV1	35
bta04520	KEGG	bta04520	Adherens junction	28/1305	70/6119	0.000283799	0.00610258	0.00476413	ACTG1/ACTN1/ACTN4/BAIAP2/CREBBP/CTNNB1/CTNND1/ERBB2/FER/FGFR1/FYN/IGF1R/MAPK1/MET/NECTIN1/NECTIN4/PTPN1/PTPN6/PTPRF/RAC2/RHOA/SMAD3/SMAD4/SORBS1/TGFBR2/WASF2/WASL/YES1	28
bta04961	KEGG	bta04961	Endocrine and other factor-regulated calcium reabsorption	19/1305	41/6119	0.000296782	0.00610258	0.00476413	ADCY6/ADCY9/AP2A1/AP2A2/ATP1A1/ATP2B1/ATP2B2/ATP2B4/CLTB/DNM2/GNAQ/GNAS/PLCB2/PRKACA/PRKCA/RAB11A/SLC8A1/SLC8A3/VDR	19
bta04931	KEGG	bta04931	Insulin resistance	36/1305	100/6119	0.000486379	0.00941287	0.00734839	ACACB/AGT/AKT2/CPT1A/CREB3L1/CREB3L2/CREB5/CRTC2/GSK3B/MLXIP/MLXIPL/OGT/PIK3R1/PIK3R2/PPARGC1A/PPP1CC/PPP1R3B/PRKAB1/PRKAG3/PRKCE/PRKCQ/PTEN/PTPA/PTPN1/PTPRF/PYGB/PYGL/RPS6KA1/RPS6KA2/RPS6KB1/SLC27A1/SLC2A1/SREBF1/STAT3/TNFRSF1A/TRIB3	36
bta04270	KEGG	bta04270	Vascular smooth muscle contraction	35/1305	98/6119	0.000686107	0.0125405	0.00979006	ACTA2/ADCY6/ADCY7/ADCY9/ADORA2B/ADRA1A/ADRA1B/AGT/CALD1/EDN1/GNA12/GNAQ/GNAS/ITPR2/KCNMA1/KCNMB1/MAP2K1/MAPK1/MYH10/MYH9/PLA2G12A/PLA2G3/PLA2G4A/PLA2G4F/PLCB2/PPP1CC/PPP1R12A/PRKACA/PRKCA/PRKCE/PRKCH/PRKCQ/PRKG1/RHOA/ROCK2	35
bta04664	KEGG	bta04664	Fc epsilon RI signaling pathway	24/1305	60/6119	0.000758174	0.0131284	0.010249	AKT2/ALOX5/ALOX5AP/FCER1G/FYN/GRB2/INPP5D/LAT/LCP2/LYN/MAP2K1/MAP2K6/MAPK1/MAPK13/MAPK14/PIK3R1/PIK3R2/PLA2G4A/PLA2G4F/PLCG1/PRKCA/RAC2/SYK/VAV1	24
bta05211	KEGG	bta05211	Renal cell carcinoma	26/1305	67/6119	0.000801202	0.0131798	0.0102891	AKT2/CDKN1A/CREBBP/EGLN1/EGLN2/EGLN3/EPAS1/ETS1/GAB1/GRB2/MAP2K1/MAPK1/MET/PAK1/PAK4/PAK6/PDGFB/PIK3R1/PIK3R2/PRCC/RAP1A/RAP1B/RAPGEF1/SLC2A1/TGFB2/TGFB3	26
bta04152	KEGG	bta04152	AMPK signaling pathway	38/1305	111/6119	0.00104782	0.0164158	0.0128154	ACACA/ACACB/ADIPOR2/ADRA1A/AKT2/CAB39/CIDEA/CPT1A/CREB3L1/CREB3L2/CREB5/CRTC2/EEF2K/EIF4EBP1/ELAVL1/FASN/FBP1/FBP2/FOXO3/HMGCR/HNF4A/IGF1R/LIPE/MLYCD/PFKFB4/PFKL/PIK3R1/PIK3R2/PPARGC1A/PPP2R5C/PRKAB1/PRKAG3/RAB2A/RHEB/RPS6KB1/SCD5/SREBF1/TBC1D1	38
bta04927	KEGG	bta04927	Cortisol synthesis and secretion	20/1305	48/6119	0.00112483	0.0168213	0.0131319	ADCY6/ADCY7/ADCY9/AGT/ATF2/CACNA1G/CREB3L1/CREB3L2/CREB5/CYP11A1/GNAQ/GNAS/ITPR2/LDLR/NR4A1/ORAI1/PDE8A/PLCB2/PRKACA/SCARB1	20
bta04142	KEGG	bta04142	Lysosome	42/1305	127/6119	0.00128828	0.018428	0.0143863	AP1B1/AP1G1/AP1G2/AP1S1/AP3D1/AP3M1/AP4B1/AP4S1/ARSA/ARSG/ASAH1/ATP6AP1/ATP6V0B/ATP6V0D1/CLTB/CTSB/CTSZ/ENTPD4/FUCA2/GALC/GBA/GGA1/GLB1/GNPTAB/GNS/IGF2R/LAMP1/LAMP2/LAMP3/LAPTM4B/LAPTM5/LITAF/NPC1/PPT1/PSAP/SCARB2/SLC11A1/SLC11A2/SLC17A5/TCIRG1/TPP1/WDR7	42
bta04020	KEGG	bta04020	Calcium signaling pathway	56/1305	181/6119	0.00137201	0.0188079	0.0146829	ADCY7/ADCY9/ADORA2B/ADRA1A/ADRA1B/ATP2A3/ATP2B1/ATP2B2/ATP2B4/CACNA1G/CD38/CHRM3/EDNRB/ERBB2/ERBB3/F2R/FGF1/FGF2/FGFR1/GDNF/GNA15/GNAQ/GNAS/HRH1/ITPKC/ITPR2/MCU/MET/NOS2/NTRK2/NTRK3/ORAI1/P2RX1/P2RX4/PDE1A/PDGFB/PHKG1/PLCB2/PLCD3/PLCE1/PLCG1/PPIF/PPP3CA/PPP3CC/PPP3R1/PRKACA/PRKCA/PTGER3/PTK2B/RET/SLC25A5/SLC25A6/SLC8A1/SLC8A3/STIM1/TBXA2R	56
bta04261	KEGG	bta04261	Adrenergic signaling in cardiomyocytes	38/1305	113/6119	0.00152563	0.0200773	0.0156738	ADCY6/ADCY7/ADCY9/ADRA1A/ADRA1B/AGT/AKT2/ATF2/ATP1A1/ATP2A3/ATP2B1/ATP2B2/ATP2B4/BCL2/CACNB2/CREB3L1/CREB3L2/CREB5/CREM/GNAI2/GNAQ/GNAS/KCNQ1/MAPK1/MAPK13/MAPK14/PIK3R6/PLCB2/PPP1CC/PPP2R5C/PRKACA/PRKCA/RPS6KA5/SCN4B/SLC8A1/SLC8A3/SLC9A1/TPM4	38
bta04070	KEGG	bta04070	Phosphatidylinositol signaling system	32/1305	92/6119	0.00188907	0.023904	0.0186613	CDS2/DGKA/DGKD/DGKZ/IMPA2/INPP1/INPP5D/INPP5E/IP6K1/IP6K2/IP6K3/ITPK1/ITPKC/ITPR2/MTMR1/MTMR2/MTMR3/MTMR6/PI4K2A/PI4KA/PIK3R1/PIK3R2/PIP4K2A/PIP4K2B/PLCB2/PLCD3/PLCE1/PLCG1/PPIP5K2/PRKCA/PTEN/SYNJ1	32
bta05206	KEGG	bta05206	MicroRNAs in cancer	47/1305	149/6119	0.0020937	0.0252178	0.0196869	ABCC1/ABL1/APC/BCL2/CCNG1/CD44/CDK6/CDKN1A/CDKN1B/CREBBP/DNMT1/DNMT3A/E2F3/EFNA1/EFNA2/EFNA4/EFNA5/ERBB2/ERBB3/EZR/FOXP1/FSCN1/GRB2/HDAC1/MAP2K1/MAPK1/MDM2/MET/PAK4/PDGFB/PIK3R1/PIK3R2/PLCG1/PRKCA/PRKCE/PTEN/RECK/RHOA/RPS6KA5/SERPINB5/SHC4/SPRY2/ST14/STAT3/TGFB2/TNC/ZEB1	47
bta04926	KEGG	bta04926	Relaxin signaling pathway	34/1305	100/6119	0.00214619	0.0252178	0.0196869	ACTA2/ADCY6/ADCY7/ADCY9/AKT2/ARRB1/ATF2/COL4A1/CREB3L1/CREB3L2/CREB5/EDN1/EDNRB/GNA15/GNAI2/GNAS/GNB1/GNG10/GNG12/GNG7/GRB2/MAP2K1/MAPK1/MAPK13/MAPK14/NOS2/PIK3R1/PIK3R2/PLCB2/PRKACA/PRKCA/SHC4/SMAD2/TGFBR2	34
bta04071	KEGG	bta04071	Sphingolipid signaling pathway	36/1305	108/6119	0.00238221	0.0270257	0.0210983	ABCC1/AKT2/ASAH1/BCL2/CERS2/CERS5/CERS6/DEGS1/DEGS2/FCER1G/FYN/GNA12/GNAI2/GNAQ/MAP2K1/MAP3K5/MAPK1/MAPK13/MAPK14/PIK3R1/PIK3R2/PLCB2/PPP2R5C/PRKCA/PRKCE/PTEN/RAC2/RHOA/ROCK2/S1PR2/S1PR3/SGMS1/SGPL1/SGPP1/SPTLC2/TNFRSF1A	36
bta04660	KEGG	bta04660	T cell receptor signaling pathway	34/1305	101/6119	0.00258777	0.0283792	0.0221549	AKT2/CARD11/CD247/CD8A/CTLA4/FYN/GRAP2/GRB2/GSK3B/IL10/LAT/LCK/LCP2/MAP2K1/MAPK1/MAPK13/MAPK14/NCK1/NFATC1/PAK1/PAK4/PAK6/PIK3R1/PIK3R2/PLCG1/PPP3CA/PPP3CC/PPP3R1/PRKCQ/PTPN6/PTPRC/RASGRP1/RHOA/VAV1	34
bta04810	KEGG	bta04810	Regulation of actin cytoskeleton	55/1305	182/6119	0.00270407	0.028698	0.0224038	ACTG1/ACTN1/ACTN4/AKT2/APC/ARHGEF7/BAIAP2/CHRM3/DIAPH2/EZR/F2R/FGF1/FGF2/FGFR1/GNA12/GNG12/ITGA2/ITGA2B/ITGA4/ITGA6/ITGA7/ITGAL/ITGAM/ITGB1/ITGB2/ITGB4/ITGB7/LIMK2/LPAR2/LPAR5/MAP2K1/MAPK1/MYH10/MYH9/NCKAP1L/PAK1/PAK4/PAK6/PDGFB/PIK3R1/PIK3R2/PIP4K2A/PIP4K2B/PPP1CC/PPP1R12A/PTK2/RAC2/RHOA/ROCK2/RRAS2/SLC9A1/SSH3/VAV1/WASF2/WASL	55
bta04925	KEGG	bta04925	Aldosterone synthesis and secretion	27/1305	76/6119	0.00294991	0.0303287	0.0236769	ADCY6/ADCY7/ADCY9/AGT/ATF2/ATP1A1/ATP2B1/ATP2B2/ATP2B4/CACNA1G/CREB3L1/CREB3L2/CREB5/CYP11A1/GNAQ/GNAS/ITPR2/LDLR/LIPE/NR4A1/ORAI1/PLCB2/PRKACA/PRKCA/PRKCE/PRKD3/SCARB1	27
bta05200	KEGG	bta05200	Pathways in cancer	116/1305	434/6119	0.00317433	0.0316471	0.0247061	ABL1/ADCY6/ADCY7/ADCY9/AGT/AKT2/APC/APPL1/BCL2/CDK6/CDKN1A/CDKN1B/COL4A1/CREBBP/CSF1R/CSF2RB/CTBP2/CTNNB1/CUL1/DAPK3/DDB2/DVL1/E2F3/EDN1/EDNRB/EGLN1/EGLN2/EGLN3/EPAS1/ERBB2/ETS1/F2R/FGF1/FGF2/FGFR1/FZD1/GLI2/GNA12/GNAI2/GNAQ/GNAS/GNB1/GNG10/GNG12/GNG7/GRB2/GSK3B/GSTM3/HDAC1/HSP90AB1/IFNAR1/IGF1R/IL2RA/IL4R/IL6R/IL7R/ITGA2/ITGA2B/ITGA6/ITGB1/KEAP1/KIT/LAMB2/LAMB3/LAMC1/LOC615514/LPAR2/LPAR3/LPAR5/…	116
bta04371	KEGG	bta04371	Apelin signaling pathway	37/1305	114/6119	0.00350636	0.0339292	0.0264877	ACTA2/ADCY6/ADCY7/ADCY9/AKT2/EGR1/GNAI2/GNAQ/GNB1/GNG10/GNG12/GNG7/ITPR2/LIPE/MAP2K1/MAPK1/MEF2A/MEF2C/MEF2D/NOS2/PIK3R6/PLAT/PLCB2/PPARGC1A/PRKAB1/PRKACA/PRKAG3/PRKCE/RPS6KB1/RRAS2/SERPINE1/SLC8A1/SLC8A3/SLC9A1/SMAD2/SMAD3/SMAD4	37
bta04360	KEGG	bta04360	Axon guidance	48/1305	157/6119	0.00380671	0.0352363	0.0275081	ABL1/EFNA1/EFNA2/EFNA4/EFNA5/EPHB1/EPHB3/EPHB4/FES/FYN/GNAI2/GSK3B/ITGB1/LIMK2/LRIG2/MAPK1/MET/NCK1/NTN1/NTNG2/PAK1/PAK4/PAK6/PARD6B/PIK3R1/PIK3R2/PLCG1/PLXNC1/PPP3CA/PPP3CC/PPP3R1/PRKCA/PTK2/RAC2/RASA1/RHOA/ROBO1/ROCK2/SEMA3A/SEMA4D/SEMA6A/SEMA6D/SRGAP1/SRGAP2/SRGAP3/SSH3/TRPC6/UNC5B	48
bta04750	KEGG	bta04750	Inflammatory mediator regulation of TRP channels	28/1305	81/6119	0.00390833	0.0352363	0.0275081	ADCY6/ADCY7/ADCY9/F2RL1/GNAQ/GNAS/HRH1/IL1R1/ITPR2/MAP2K6/MAPK13/MAPK14/P2RY2/PIK3R1/PIK3R2/PLA2G4A/PLA2G4F/PLCB2/PLCG1/PPP1CC/PRKACA/PRKCA/PRKCE/PRKCH/PRKCQ/PTGER2/TRPV2/TRPV4	28
bta04970	KEGG	bta04970	Salivary secretion	23/1305	63/6119	0.00396275	0.0352363	0.0275081	ADCY6/ADCY7/ADCY9/ADRA1A/ADRA1B/ATP1A1/ATP2B1/ATP2B2/ATP2B4/CD38/CHRM3/GNAQ/GNAS/ITPR2/KCNMA1/LPO/PLCB2/PRKACA/PRKCA/PRKG1/SLC12A2/SLC9A1/TRPV6	23
bta00562	KEGG	bta00562	Inositol phosphate metabolism	24/1305	67/6119	0.0043589	0.0367712	0.0287064	ALDH6A1/FIG4/IMPA2/INPP1/INPP5D/INPP5E/INPP5K/ISYNA1/ITPK1/ITPKC/MTMR1/MTMR2/MTMR3/MTMR6/PI4K2A/PI4KA/PIP4K2A/PIP4K2B/PLCB2/PLCD3/PLCE1/PLCG1/PTEN/SYNJ1	24
bta05414	KEGG	bta05414	Dilated cardiomyopathy	24/1305	67/6119	0.0043589	0.0367712	0.0287064	ACTG1/ADCY6/ADCY7/ADCY9/AGT/ATP2A3/CACNB2/DAG1/GNAS/ITGA2/ITGA2B/ITGA4/ITGA6/ITGA7/ITGB1/ITGB4/ITGB7/LMNA/PRKACA/SLC8A1/SLC8A3/TGFB2/TGFB3/TPM4	24
bta01212	KEGG	bta01212	Fatty acid metabolism	20/1305	53/6119	0.00454836	0.0374103	0.0292053	ACAA2/ACACA/ACADSB/ACAT1/ACSBG1/ACSL1/ACSL3/ACSL5/ACSL6/CPT1A/CPT2/ELOVL5/FASN/HACD2/HSD17B12/MECR/OXSM/PPT1/SCD5/TECR	20
bta05230	KEGG	bta05230	Central carbon metabolism in cancer	22/1305	61/6119	0.00565554	0.0440364	0.0343781	AKT2/ERBB2/FGFR1/GCK/HK1/IDH2/KIT/MAP2K1/MAPK1/MET/NTRK3/PFKL/PIK3R1/PIK3R2/PTEN/RET/SCO2/SIRT6/SLC16A3/SLC2A1/SLC7A5/TIGAR	22
bta04062	KEGG	bta04062	Chemokine signaling pathway	50/1305	168/6119	0.00574807	0.0440364	0.0343781	ADCY6/ADCY7/ADCY9/AKT2/ARRB1/CCL26/CCL28/CCL3/CCR4/CCR6/CCR7/CX3CR1/ELMO1/FGR/FOXO3/GNAI2/GNAQ/GNB1/GNG10/GNG12/GNG7/GRB2/GRK2/GRK3/GRK5/GSK3B/HCK/LOC508666/LYN/MAP2K1/MAPK1/NCF1/PAK1/PIK3R1/PIK3R2/PIK3R6/PLCB2/PLCG1/PRKACA/PTK2/PTK2B/RAC2/RAP1A/RAP1B/RASGRP2/RHOA/ROCK2/SHC4/STAT3/VAV1	50
bta04014	KEGG	bta04014	Ras signaling pathway	56/1305	192/6119	0.00575552	0.0440364	0.0343781	ABL1/AKT2/CSF1R/EFNA1/EFNA2/EFNA4/EFNA5/ETS1/ETS2/FGF1/FGF2/FGFR1/GAB1/GNB1/GNG10/GNG12/GNG7/GRB2/IGF1R/KIT/LAT/MAP2K1/MAPK1/MET/NTRK2/PAK1/PAK4/PAK6/PDGFB/PGF/PIK3R1/PIK3R2/PLA2G12A/PLA2G3/PLA2G4A/PLA2G4F/PLCE1/PLCG1/PRKACA/PRKCA/RAB5C/RAC2/RALGDS/RAP1A/RAP1B/RASA1/RASA3/RASAL3/RASGRF1/RASGRP1/RASGRP2/RASSF5/RHOA/RRAS2/SHC4/TEK	56
