# Supplementary material for: Genome-Wide DNA Methylation and Transcriptome Integration Associates DNA Methylation Changes with Bovine Subclinical Mastitis Caused by Staphylococcus chromogenes
Source: Int J Mol Sci. 2023 Jun 20;24(12):10369. doi: 10.3390/ijms241210369 (PMC10299661; doi:10.3390/ijms241210369)
Supplement: Supplementary file 1 [file ijms-24-10369-s001.zip › TableS10 List of identified differentially methylated and expressed genes (DMEGs).xlsx]

## Sheet: TableS10A_Promoter_DMEGs
Table S10A List of identified differentially methylated (promoter) and expressed genes (DMEGs)
gene_ID	SCpositivemethmean	SCpositiveexpmean	controlmethmean	controlexpmean	promtoer methylation change	gene expression change	var	GMM_score
LOC112447120	84.1914	696.045	70.1301	131.702	14.0613	2.40191	139.971	-9.24906
CLDN8	74.5354	13.6645	42.7206	351.137	31.8148	-4.68353	879.424	-20.6859
LOC112447173	61.7375	77.4912	80.4248	15.3381	-18.6873	2.33692	455.443	-10.881
STX19	83.5416	5.89237	67.2624	60.5516	16.2792	-3.36125	199.953	-9.80318
TBC1D23	24.7979	1946.96	35.5262	920.744	-10.7284	1.08035	176.725	-6.20449
GCSAM	47.0646	5.35171	61.2483	20.2256	-14.1837	-1.91811	281.763	-9.47982
GRAMD1C	38.5241	55.4717	26.8822	210.089	11.642	-1.92118	86.5615	-5.82518
CD80	87.4432	540.519	72.709	226.7	14.7342	1.25356	151.434	-6.98123
SLC15A2	74.3352	10.6365	52.5783	128.372	21.7569	-3.59323	382.364	-12.2168
MUC20	77.3865	18.5316	54.3598	162.306	23.0267	-3.13066	429.887	-11.5827
NRROS	14.7292	1209.73	36.9657	552.312	-22.2366	1.13113	613.958	-11.3403
LOC101905099	69.866	3.58094	52.6929	7.35394	17.1731	-1.03818	215.841	-6.45024
LOC104970904	82.6322	1.36707	46.2681	8.8978	36.3641	-2.70237	1152.72	-18.892
ATP13A4	86.3625	35.3704	61.7972	431.213	24.5653	-3.60779	498.466	-13.4548
LOC101906248	86.195	20.8563	71.351	8.47645	14.844	1.29895	154.26	-7.09502
LOC101907683	86.4211	2.50212	68.0538	7.04992	18.3673	-1.49446	253.313	-7.1692
LOC100849009	43.5462	2.52827	55.2945	9.6804	-11.7483	-1.93692	206.455	-8.45882
LOC112447727	77.2011	3.05745	56.1208	6.72885	21.0802	-1.13803	345.888	-8.02672
PLD1	42.0976	486.301	70.2152	242.719	-28.1176	1.00256	939.287	-15.1829
SUCNR1	34.6952	104.242	70.9539	40.8209	-36.2587	1.35256	1505.15	-22.1006
P2RY13	34.1982	900.601	78.2534	206.133	-44.0551	2.12732	2173.35	-30.5624
ACPP	82.2028	2.63808	67.0049	9.2104	15.1979	-1.80378	163.76	-6.48128
IGSF5	67.1788	24.7967	34.5903	119.635	32.5885	-2.27042	909.307	-15.5099
TFF3	85.1925	32.1634	68.6023	1382.31	16.5902	-5.42552	226.141	-17.3869
TRPM2	37.5156	212.1	57.5482	458.772	-20.0326	-1.11303	509.031	-11.1132
LOC101906512	79.3753	3.80307	57.5236	23.2555	21.8518	-2.61234	380.231	-10.0212
LOC107132224	51.2308	181.247	72.6405	44.0584	-21.4097	2.04047	576.876	-11.7763
LOC112448105	52.6391	96.8731	71.1386	24.9782	-18.4995	1.95543	445.766	-10.1798
LOC112448120	86.2232	1.72516	70.5168	6.9564	15.7063	-2.01161	177.653	-6.89659
MSTN	77.7723	4.93434	55.5929	23.1218	22.1794	-2.22833	391.267	-9.53669
LOC112442544	89.7494	1.48635	75.3586	6.61394	14.3907	-2.15373	145.207	-6.76232
SP5	27.0844	3.32241	45.8763	9.29968	-18.7919	-1.48495	455.493	-11.0128
TANK	61.0042	1137.05	39.9561	417.773	21.0481	1.44451	346.254	-10.0161
LOC112442568	87.5736	7.51948	76.6155	3.31783	10.9581	1.18039	73.162	-5.75095
TNFAIP6	59.0047	109.737	79.6617	29.9271	-20.657	1.87453	540.733	-11.1472
LOC112442632	14.8909	54.1561	50.954	15.7463	-36.063	1.78211	1491.49	-22.1756
KYNU	19.5188	159.103	39.0223	73.7997	-19.5036	1.10828	486.112	-9.81576
HNMT	77.8002	675.14	60.6219	226.971	17.1783	1.57268	218.166	-8.49101
MAP3K19	81.6413	8.82357	62.7746	19.309	18.8667	-1.12984	268.551	-7.11067
STAT4	81.1347	182.345	66.7906	684.837	14.3442	-1.90909	143.181	-6.3928
PLCL1	52.8123	31.1203	40.5165	140.078	12.2959	-2.17031	99.8794	-6.33128
AOX2	83.5206	58.2927	56.1303	28.8077	27.3903	1.01686	620.462	-12.8999
GPR1	68.9735	4.27867	87.08	14.1056	-18.1066	-1.72103	427.455	-11.0811
ERBB4	52.0153	20.6237	41.0653	71.829	10.95	-1.80027	73.9862	-5.53671
TNS1	55.2213	1215.58	40.1745	413.146	15.0468	1.55692	160.116	-7.63559
CXCR1	71.5435	7712.86	53.7589	2607.02	17.7845	1.56486	236.293	-8.73054
SLC11A1	37.8636	3259.3	61.8345	960.699	-23.9709	1.76241	704.814	-12.904
LOC112443148	88.1077	36.0231	74.4073	6.85189	13.7004	2.39435	131.725	-9.10131
SPATA3	68.3119	2.17018	52.1785	12.7893	16.1334	-2.55905	191.446	-7.92587
CHRND	34.1517	2.21301	19.7902	6.59685	14.3615	-1.57577	142.529	-6.00027
TINAGL1	29.622	3257.62	12.1682	1080.9	17.4538	1.59159	226.389	-8.64428
KDF1	61.7986	11.8245	50.9033	44.9286	10.8954	-1.92585	73.4979	-5.70293
SFN	61.8967	61.4553	43.2334	295.01	18.6633	-2.26315	265.447	-8.20415
ZNF683	85.5591	13.3894	72.2345	80.9055	13.3245	-2.59515	122.972	-7.31636
LOC112443413	83.6384	107.883	58.3843	24.8118	25.2541	2.12036	522.51	-14.0109
LOC104971364	72.7302	114.992	59.8348	25.3576	12.8954	2.18103	113.314	-8.27996
PLA2G2C	54.9641	2.36615	68.8041	8.1451	-13.8399	-1.78339	269.944	-9.04641
PBX1	38.2349	37.5248	24.5636	308.481	13.6713	-3.03926	132.963	-8.37698
FCGR2A	80.2178	174.298	92.0938	75.4475	-11.876	1.20801	208.754	-6.67196
LOC112445927	40.9973	5.21447	25.2799	11.3455	15.7174	-1.12152	175.421	-6.01963
LOC613822	89.1706	143.846	78.0396	69.5727	11.131	1.04794	75.7794	-5.60595
LOC781726	82.15	103.594	59.0267	33.0721	23.1233	1.64725	428.196	-11.558
LOC100850659	73.5188	7.7545	57.8474	72.8076	15.6714	-3.23098	182.762	-9.30791
SH2D2A	58.154	63.9475	68.9303	210.794	-10.7763	-1.72088	178.959	-7.65829
RHBG	37.8229	1.43605	27.1786	8.65516	10.6444	-2.59146	72.1594	-6.84507
ARHGEF2	73.189	3460.35	57.5494	1268.08	15.6396	1.44827	174.975	-7.64615
SLC50A1	38.7731	51.684	27.412	206.973	11.361	-2.00165	81.8007	-5.89383
S100A7	54.4026	5.09645	69.5464	10.8987	-15.1438	-1.09659	312.504	-8.50075
CRCT1	85.1953	425.818	72.7141	194.746	12.4812	1.12864	101.086	-6.07922
LOC112445948	33.2861	1.36707	22.0862	6.51832	11.1999	-2.25342	79.9706	-6.27864
RORC	35.699	23.2046	25.0716	83.9045	10.6274	-1.85434	68.8252	-5.55786
SELENBP1	44.5818	17.1492	33.0521	315.794	11.5297	-4.20278	97.8186	-11.5345
SV2A	73.6791	40.0849	60.0039	88.0975	13.6752	-1.13604	125.67	-5.45691
LOC504599	59.497	18.4207	48.0573	63.5381	11.4396	-1.78629	82.4467	-5.60362
BCL2L15	78.0625	63.1029	65.9955	346.045	12.067	-2.45518	96.6841	-6.79784
PTPN22	22.6843	198.269	62.5279	626.83	-39.8436	-1.66062	1795.99	-29.0009
LOC112445973	14.0675	9.18052	29.7488	3.21574	-15.6813	1.51343	333.632	-8.37829
PROK1	72.1361	2.84353	57.4175	27.8061	14.7187	-3.28965	158.954	-9.23576
LOC615514	82.8245	2.81738	60.0559	12.8125	22.7686	-2.18513	414.618	-9.73866
TGFBR3	39.5165	253.924	28.3228	1771.93	11.1937	-2.80285	82.4777	-7.38541
LOC510382	69.9052	150.53	80.3246	55.8176	-10.4194	1.43125	169.627	-6.45818
LOC511531	48.9958	311.136	61.406	136.196	-12.4102	1.19186	224.364	-6.83497
GIPC2	63.4565	17.6794	41.586	562.184	21.8706	-4.9909	398.337	-17.0115
LOC101902048	82.0223	717.155	70.5623	99.0192	11.46	2.85651	89.1591	-9.70401
KANK4	54.4984	4.42689	65.1095	11.3262	-10.6111	-1.3553	173.581	-6.99019
LOC530929	47.9948	94.0442	32.9715	256.053	15.0233	-1.44503	158.301	-6.05285
PRKAA2	41.2165	55.6049	27.2762	907.671	13.9403	-4.02889	145.741	-11.2956
LOC100297152	73.8629	24.7007	62.5476	87.2016	11.3153	-1.8198	80.3524	-5.62587
ECHDC2	71.9007	55.0791	60.6184	166.018	11.2823	-1.59176	79.0621	-5.33783
TTC39A	38.8974	59.1223	26.8554	334.756	12.0421	-2.50134	96.4236	-6.88324
SLC5A9	77.1829	10.1504	64.6072	109.415	12.5757	-3.43019	112.117	-9.20369
MOB3C	27.8333	348.997	42.9515	134.949	-15.1181	1.3708	313.008	-8.00245
KLF17	90.4942	155.869	79.8752	28.3348	10.619	2.45969	72.5828	-8.32056
LOC510369	72.4785	3.95043	55.2042	59.0739	17.2743	-3.90244	232.119	-11.6426
C3H1orf210	62.6057	17.5697	34.5608	238.132	28.0449	-3.7606	665.152	-15.6202
TMEM125	79.7153	25.1487	53.5817	223.182	26.1335	-3.14966	567.147	-13.0996
LOC782545	66.0095	1.699	34.1787	6.61606	31.8307	-1.96129	863.077	-14.6538
CITED4	44.7295	101.538	33.5074	1071.58	11.2221	-3.39964	86.4964	-8.91525
RHBDL2	80.6819	9.04752	58.0424	40.0127	22.6395	-2.14486	409.243	-9.62505
FHL3	54.2065	855.519	77.1755	373.998	-22.969	1.19377	650.908	-11.8122
HES6	53.6233	8.90936	31.1395	45.3799	22.4838	-2.34866	403.852	-9.85077
IL3RA	66.7219	78.2152	78.08	19.2613	-11.3581	2.02174	196.994	-7.56277
PPP1R9A	89.2125	211.69	77.273	99.1797	11.9395	1.09383	90.4862	-5.87895
AGR2	80.5274	4.0673	67.1665	93.7626	13.3608	-4.52687	136.942	-12.9911
IL6	48.0387	6.41008	59.9214	2.61391	-11.8827	1.29413	209.189	-6.75511
GSAP	48.2904	1963.56	25.4615	653.484	22.8288	1.58725	415.928	-11.2604
LOC112446475	92.0491	9.29039	73.7899	2.98181	18.2592	1.63955	251.282	-9.09141
CCDC71L	85.8393	303.364	69.7457	631.932	16.0936	-1.05872	185.383	-6.10317
GPR141	26.6465	107.369	41.6216	45.467	-14.9751	1.23969	307.605	-7.82599
AOAH	62.0125	303.362	82.7391	133.733	-20.7266	1.18168	541.643	-10.5138
LOC112446387	83.875	1.9301	61.5941	12.6851	22.2809	-2.71639	397.541	-10.3964
HOXA6	22.3666	9.44994	32.7396	21.6886	-10.373	-1.19856	167.038	-6.68453
HOXA5	75.117	6.11727	40.9224	13.5611	34.1946	-1.14851	1005.01	-15.9525
HOXA4	80.5736	2.5634	44.579	7.48365	35.9946	-1.54568	1123.27	-17.4736
GCK	90.5669	38.9254	80.4827	980.817	10.0843	-4.6552	77.7016	-13.1259
TRGC4	65.5202	31.3996	54.0877	189.349	11.4325	-2.59223	85.6083	-6.96436
LRRC4	35.3274	9.35859	17.4599	47.5533	17.8676	-2.34518	240.725	-8.06769
KCP	66.285	154.362	83.0039	49.7377	-16.7189	1.63391	372.872	-8.95421
LOC514257	78.0729	45.4389	62.0519	16.7885	16.021	1.43646	185.1	-7.76779
SVOPL	78.4014	4.68656	46.7042	9.67177	31.6972	-1.04525	852.783	-14.0988
MGAM	68.3608	164.549	57.6023	53.1804	10.7584	1.62955	71.2225	-6.45888
LOC101904744	66.1789	5.0631	49.7082	10.2759	16.4707	-1.02117	195.702	-6.20667
LOC104972290	76.5767	2.71654	54.2639	8.13448	22.3128	-1.58228	394.266	-8.86293
LOC112446653	83.84	35.7054	70.5606	6.39918	13.2794	2.48018	122.922	-9.19096
LOC107132462	92.3826	12.0379	76.206	4.49807	16.1766	1.4202	189.277	-7.79729
GLYCAM1	84.5652	3685	59.8147	152719	24.7505	-5.37307	522.002	-19.7361
PDE1B	42.3915	114.672	30.8653	43.6758	11.5263	1.39261	83.6946	-6.23358
GPR84	7.83811	1603.27	24.9875	387.857	-17.1494	2.04742	391.258	-9.7051
NR4A1	76.6711	330.501	87.4076	720.705	-10.7365	-1.12475	176.384	-6.71729
SLC11A2	63.1001	3726.18	43.1733	1837.23	19.9268	1.02017	304.761	-8.71418
GPD1	78.7877	45.3414	57.3709	646.425	21.4168	-3.83358	371.102	-12.7735
LOC784038	83.0403	9.27254	68.5127	191.595	14.5277	-4.36895	162.272	-12.6
H1FNT	75.2215	7.49682	57.1837	874.751	18.0377	-6.86645	286.286	-25.2873
RAB3IP	41.8205	387.427	29.3656	1293.19	12.4549	-1.73893	101.459	-5.74034
CYP27B1	87.3466	280.79	74.8704	55.9521	12.4762	2.32723	105.484	-8.51721
SHMT2	24.0495	2462.52	13.1073	888.75	10.9422	1.47029	73.7473	-6.21508
GDF11	33.5805	8.64883	15.6381	19.8365	17.9424	-1.19758	239.305	-6.8033
GLT8D2	43.7303	1.89825	30.8913	41.371	12.839	-4.44588	125.185	-12.6035
LOC112446721	92.2649	49.4479	81.5285	15.5279	10.7364	1.67104	71.0084	-6.53277
NCF4	64.6261	412.4	54.5617	168.614	10.0644	1.29032	59.1614	-5.70565
CARD10	86.9	10.275	71.9351	21.4782	14.9648	-1.06373	155.997	-5.76429
PLEKHA5	31.1922	108.927	17.9296	305.603	13.2626	-1.4883	117.446	-5.64085
PIK3C2G	39.75	6.87606	20.125	109.294	19.625	-3.99049	307.734	-12.6249
MGP	80.9599	5.27903	70.3599	26.1204	10.6	-2.30683	70.1294	-6.2818
LOC112446743	66.2403	2.34748	54.7405	22.2757	11.4998	-3.24629	90.4381	-8.53002
LOC100847738	91.85	2.19306	72	18.2014	19.85	-3.05303	309.162	-10.1448
LOC101905165	79.452	2.59725	56.1458	10.3927	23.3061	-2.00052	435.97	-9.74939
LOC100336869	70.1875	8.06114	60.1863	68.1891	10.0012	-3.08049	64.7363	-7.9041
CLEC12A	64.9502	1358.05	75.0848	563.214	-10.1346	1.26979	161.86	-6.2043
CLECL1	37.6563	193.763	68.8795	63.4866	-31.2232	1.60977	1140.92	-17.887
LOC100297676	64.1608	10100.6	38.4285	4653.17	25.7323	1.11815	540.946	-12.0266
RIMKLB	63.7353	59.1384	48.9431	133.79	14.7922	-1.17781	151.948	-5.78248
SCNN1A	81.2604	33.0201	66.1254	138.065	15.135	-2.06393	163.096	-6.81548
TNFRSF1A	37.7923	3193.11	55.7226	1217.55	-17.9303	1.39098	420.115	-9.2504
TMEM121B	42.3752	7.58846	27.9271	16.655	14.4481	-1.13408	143.524	-5.65953
ADA2	73.2002	134.055	84.6855	57.1817	-11.4854	1.2292	197.727	-6.56643
LGALS1	26.6225	3757.05	43.2223	1492.18	-16.5998	1.33218	367.321	-8.5905
SOX10	73.5728	111.175	33.9949	1383.02	39.5779	-3.63692	1386.3	-23.2819
LOC101905166	59.2667	12.0277	29.2703	125.177	29.9965	-3.37954	766.026	-15.7784
LOC104976976	37.8274	2.93817	21.4419	8.37043	16.3855	-1.51039	194.425	-6.51505
LOC101904078	64.8634	2.28049	41.8825	5.86758	22.981	-1.36342	420.596	-9.0202
PNPLA3	42.8608	18.804	32.494	400.579	10.3668	-4.41297	79.9371	-12.1946
LOC101908206	85.1313	15.8544	67.3212	224.806	17.8101	-3.82573	247.659	-11.5535
LOC112447025	70.125	1	54.9375	19.0305	15.1875	-4.25024	177.58	-12.3043
LOC112447045	89.4985	13.853	78.7187	3.94086	10.7797	1.81361	72.2627	-6.82953
LOC107132550	83.7735	19.6349	64.7097	9.5527	19.0638	1.03944	275.488	-8.34956
SPP1	73.1112	241040	46.9487	117316	26.1625	1.03888	560.919	-12.1526
SLC34A2	74.8104	104.541	51.1771	4801.28	23.6332	-5.52128	475.12	-19.9412
FAM114A1	44.3448	287.796	32.6623	1070.79	11.6825	-1.89556	87.2138	-5.79626
CNGA1	85.4507	2.99617	66.7584	7.44955	18.6923	-1.31403	263.273	-7.15172
LNX1	80.254	45.5875	55.6691	119.521	24.585	-1.39055	488.912	-9.84037
LOC112447080	43.3007	21.3332	33.1845	5.23582	10.1161	2.02661	62.6069	-7.1217
LOC101902029	37.2827	5.6964	48.8131	17.9801	-11.5303	-1.65828	199.369	-7.83382
LOC112447093	78.1063	1.65617	60.25	8.86804	17.8563	-2.42076	240.715	-8.19268
CSN1S1	82.0222	23948.4	68.9144	855219	13.1078	-5.1583	137.441	-15.5729
CSN2	73.5425	33756.8	52.3006	1.40335e+06	21.2419	-5.37755	378.28	-18.4378
CSN3	67.375	6953.22	47.175	297632	20.2	-5.41971	340.773	-18.2951
LOC104968905	54.9722	9.2162	68.2625	216.794	-13.2903	-4.55601	269.028	-17.8678
PF4	38.3511	93.2356	49.9746	25.6778	-11.6235	1.86036	203.751	-7.38281
SOWAHB	27.4849	58.1219	16.4116	382.052	11.0733	-2.71662	79.9505	-7.17481
CXCL13	55.2186	17.4202	70.9036	7.20069	-15.685	1.27455	333.03	-8.14707
PRKG2	71.1311	19.4442	42.8408	423.398	28.2902	-4.4446	683.152	-17.8407
PLAC8	76.798	453.965	63.9054	192.13	12.8925	1.24049	109.757	-6.36968
PLAC8_1	83.3573	64.0523	93.6225	15.7276	-10.2652	2.02595	167.896	-7.26752
LOC112447116	31.2648	3.38041	46.5792	8.63838	-15.3144	-1.35356	319.11	-8.96337
MSX1	12.9743	3.89092	24.6466	20.4595	-11.6724	-2.39459	206.142	-9.47144
FGFBP1	79.1228	53.7743	68.745	1421.09	10.3778	-4.72394	82.8587	-13.4281
LOC112447135	33.714	124.731	21.4255	26.4295	12.2885	2.2386	101.347	-8.23204
RGS12	25.0745	81.4902	14.5224	353.032	10.5521	-2.1151	68.5656	-5.94241
SH3BP2	14.3257	4039.79	44.2407	1427.41	-29.915	1.50089	1054.01	-16.7806
FGFR3	68.0284	8.69913	54.9446	20.67	13.0838	-1.24859	113.046	-5.39044
LOC100848105	88.886	72.3082	72.3216	23.0191	16.5644	1.65133	200.807	-8.40176
LOC104969038	81.8259	2.34	63.5654	8.26203	18.2604	-1.81999	250.916	-7.45843
ISYNA1	54.4403	92.2264	29.731	44.4288	24.7093	1.05368	494.32	-11.2964
B3GNT3	21.835	83.2561	37.6418	13.2847	-15.8068	2.64779	343.27	-10.267
HSH2D	25.7548	196.817	54.5726	68.3803	-28.8179	1.5252	984.147	-15.9691
LOC100300051	41.7597	15.4994	66.389	7.60871	-24.6294	1.02649	737.846	-12.7705
LOC112447333	51.9598	54.7214	39.5729	19.3787	12.3869	1.49763	100.292	-6.65818
MISP3	87.1934	10.5938	75.35	33.0245	11.8434	-1.64031	89.3657	-5.49911
LOC101906392	46.8622	2.83733	20.8613	7.30703	26.0009	-1.36475	553.371	-10.5893
HOOK2	66.2638	16.5569	48.8885	58.6188	17.3753	-1.82393	223.828	-7.16229
MUC16	64.0524	714.145	51.8021	5340.09	12.2503	-2.90258	102.486	-7.78421
RETN	39.7174	114.916	51.1883	26.5507	-11.471	2.11376	200.544	-7.75414
ANGPTL4	45.6549	441.418	27.5251	174.329	18.1298	1.34033	246.241	-8.44779
LOC112447357	53.9612	78.2502	68.6384	19.4615	-14.6772	2.00747	299.999	-8.64234
C3	33.7019	1520.37	23.5269	5649.08	10.175	-1.89359	61.8203	-5.54468
SLC25A23	43.064	22.2509	21.4956	72.0774	21.5685	-1.69568	365.674	-8.63057
STAP2	88.8289	23.698	75.8902	247.456	12.9387	-3.38433	119.259	-9.13709
GNA15	12.7736	730.915	27.3868	332.637	-14.6132	1.13576	294.801	-7.59818
PEAK3	61.5188	86.1441	77.5424	40.0482	-16.0236	1.10502	345.012	-8.15934
ACSL6	24.0208	2682.67	48.4746	821.267	-24.4538	1.70775	730.412	-13.1451
LOC112447383	80.6238	1	57.1519	6.66502	23.4719	-2.73661	446.162	-10.962
LOC107132618	89.9586	1.59817	78.8125	26.5945	11.1461	-4.05664	89.8798	-10.9749
ELANE	43.305	13.0414	57.7241	3.77933	-14.4192	1.7869	290.293	-8.21955
SBNO2	67.3495	2245.91	43.1777	978.11	24.1718	1.19923	471.112	-11.2421
TCF7	38.3551	170.114	27.0196	768.948	11.3354	-2.17639	82.0261	-6.16862
LRRTM2	90.0791	3.5012	76.058	7.69849	14.0211	-1.13672	133.516	-5.54671
LOC112447601	75.4325	73.2205	41.7356	159.169	33.6969	-1.12024	973.658	-15.5701
LOC112447554	88.2849	2.15023	64.2433	8.62355	24.0416	-2.00379	467.115	-10.1077
SH3RF2	59.8312	11.9956	43.2332	114.899	16.5981	-3.2598	208.194	-9.62255
FAT2	76.5874	21.4883	64.6364	129.45	11.951	-2.59077	95.125	-7.04727
LOC104969225	68.1923	5.63292	55.5811	2.63317	12.6112	1.09708	103.615	-6.07033
LOC112447526	22.7083	2.93047	32.75	10.3287	-10.0417	-1.81746	160.293	-7.56945
LOC107132656	77.5532	599.555	66.8294	29.8498	10.7238	4.3281	87.5314	-15.0034
RGMB	30.5878	72.0531	43.0249	229.696	-12.4371	-1.67259	225.694	-8.22593
LOC104969002	19.7589	123.051	43.8026	41.2047	-24.0437	1.57838	708.002	-12.7621
LOC100335340	72.5651	8.85378	51.9755	17.7739	20.5896	-1.00539	327.659	-7.7619
LOC101903205	24.5534	33.7686	10.0714	778.42	14.482	-4.5268	162.533	-13.1819
LURAP1L	31.2507	63.8786	42.4308	230.172	-11.1801	-1.84931	190.27	-8.05668
LOC112447796	60.4532	28.4786	79.8035	7.12183	-19.3503	1.99956	482.423	-10.653
LOC104969334	60.4532	112.281	79.8035	27.6169	-19.3503	2.02349	482.526	-10.6879
TJP2	30.506	334.643	18.2274	865.317	12.2786	-1.37061	96.9475	-5.31054
LOC516849	86.2343	16.3738	69.1162	337.266	17.1181	-4.36443	231.213	-13.1596
DMTN	23.8781	2.50212	35.8062	16.3894	-11.9281	-2.71154	214.984	-10.419
PHYHIP	73.1373	2.79122	58.5785	6.59264	14.5588	-1.23996	146.401	-5.75997
C8H8orf58	76.8083	5.15354	60.952	12.1918	15.8563	-1.24227	179.359	-6.13743
SLC28A3	52.3863	145.193	63.6322	1287.36	-11.2459	-3.14838	198.182	-11.4375
FBP2	82.77	2.65854	71.9339	18.7176	10.836	-2.81569	76.4605	-7.36361
ECM2	92.4377	7.80489	69.167	17.3804	23.2707	-1.15501	432.08	-9.05683
LOC112447832	80.6912	270.47	90.7702	80.501	-10.0789	1.74839	162.042	-6.77814
SYK	27.7469	2505.57	16.7443	1012.32	11.0026	1.30748	74.2692	-5.9576
ABCA1	11.3262	3405.48	22.1943	1313.03	-10.868	1.37496	181.253	-6.52494
SUSD1	67.2327	1506.05	81.904	706.726	-14.6714	1.09155	296.686	-7.58868
SNTG2	83.7352	13.0328	65.6933	3.6156	18.0419	1.84984	245.28	-9.45816
COL9A1	74.5675	6.14543	57.8566	129.023	16.7108	-4.39197	219.712	-13.1575
FRK	85.9842	27.7302	61.4432	64.3142	24.5411	-1.21368	486.567	-9.72812
LOC104969531	86.3856	22.3154	68.2661	5.71865	18.1195	1.96429	248.168	-9.76198
DDO	74.2684	1.4622	46.3575	17.3313	27.9109	-3.56716	656.968	-15.0357
FAXC	71.1576	11.236	60.7434	40.3632	10.4142	-1.84492	65.3766	-5.51147
ANKRD6	40.8196	16.8568	30.6296	72.7025	10.1901	-2.10867	62.848	-5.87925
CFAP206	49.9924	7.52645	64.3568	2.42905	-14.3644	1.63158	287.866	-7.99617
SMLR1	75.4838	2.5711	56.6445	6.09303	18.8393	-1.24477	267.895	-7.16315
VNN2	71.375	2625.98	84.85	685.709	-13.475	1.93719	259.824	-8.09976
LOC112448135	54.6882	27.9996	70.9799	3.1264	-16.2918	3.16283	364.416	-11.6852
EYA4	83.1104	8.1346	68.9318	21.7292	14.1786	-1.41749	137.8	-5.80072
LOC112448069	89.7678	2.39231	78.1865	12.4385	11.5813	-2.37834	87.2862	-6.56792
LOC107132783	54.3904	123.093	78.689	43.8036	-24.2986	1.49063	721.308	-12.844
STX11	68.9165	908.616	82.3799	196.102	-13.4635	2.21207	260.678	-8.55637
LOC785982	31.4446	6.75149	45.9946	1.57841	-14.55	2.09674	296.035	-8.74004
LOC112448082	88.0558	3.07791	71.2685	85.0363	16.7873	-4.78806	225.409	-14.687
SYNJ2	36.6366	141.749	23.5495	380.005	13.0871	-1.42268	113.529	-5.53752
SYTL3	75.3592	48.2784	59.8546	193.717	15.5046	-2.0045	172.341	-6.8302
THBS2	50.4806	22.6355	36.9165	7.12015	13.5641	1.66861	125.527	-7.34817
LOC104973054	82.9365	16.957	68.2157	40.089	14.7208	-1.24132	150.334	-5.80555
LOC112448381	62.2684	129.142	51.1956	39.7494	11.0728	1.69995	76.763	-6.67644
CIDEB	50.1577	4.06702	38.108	18.3857	12.0497	-2.17654	95.1474	-6.29513
CEBPE	12.4595	30.9387	34.7278	11.5385	-22.2683	1.42296	616.361	-11.5602
LOC616138	61.7946	1.32424	47.1179	9.56553	14.6768	-2.85268	155.379	-8.16175
BRB	87.8155	1290.91	74.396	520.194	13.4195	1.31127	121.181	-6.64547
RNASE6	80.0111	2575.22	90.179	954.067	-10.1679	1.43253	163.192	-6.3894
LOC101905672	82.0385	4.16443	58.8989	39.9164	23.1395	-3.26079	435.325	-11.9353
LOC112448627	51.0491	4225.08	39.3437	1744.26	11.7054	1.27637	86.612	-6.09078
CDKL1	83.9242	4.87611	66.8771	19.1811	17.0471	-1.97588	214.709	-7.24849
TPM1	48.1159	394.557	37.5711	1943.12	10.5448	-2.30007	69.2109	-6.26147
LOC104973153	81.3729	9.57843	68.1731	36.4018	13.1998	-1.92615	117.464	-6.14643
LOC112448482	41.5678	9.54102	74.7624	2.30566	-33.1946	2.04896	1279.54	-19.9172
ATP8B4	83.029	568.017	66.7483	243.607	16.2807	1.22138	191.55	-7.48918
LOC112448507	72.8218	173.197	52.9361	54.6114	19.8858	1.66514	305.258	-9.89967
LOC101904397	72.096	4.85943	51.3283	131.058	20.7676	-4.75327	354.599	-15.6878
CCDC196	85.9119	1.20495	69.0641	13.4049	16.8478	-3.47572	216.683	-10.2652
PGF	41.8946	1.94856	30.2916	8.52565	11.603	-2.1294	86.6339	-6.13684
LOC104973262	75.0945	1.39322	57.4446	12.4531	17.6498	-3.16002	238.327	-9.67324
DIO2	56.6687	41.3398	26.3778	1081.18	30.2908	-4.70893	792.652	-19.8679
LOC101905198	76.9266	3.68155	63.856	36.4186	13.0707	-3.30629	121.53	-8.94685
LOC112448536	89.2185	22.6589	77.3839	10.1416	11.8346	1.15979	88.6864	-5.9465
ZAP70	75.2791	360.778	56.9819	1062.89	18.2972	-1.55881	251.271	-7.20067
LOC112448745	57.5651	11.5065	78.4447	1.22754	-20.8797	3.2286	558.413	-13.878
LOC112448753	19.875	15.2301	56.7886	6.99873	-36.9136	1.12176	1555.72	-22.656
XDH	74.5468	5171.67	63.0081	35778.7	11.5387	-2.7904	88.523	-7.40967
NLRC4	52.2688	478.009	68.406	139.501	-16.1372	1.77676	351.371	-8.88474
SLC8A1	84.1321	116.648	64.6121	285.718	19.5199	-1.29243	290.696	-7.45701
LOC112448777	65.325	80.789	49.8125	34.1625	15.5125	1.24174	171.036	-7.23681
IL1B	57.3834	2870.16	77.1011	921.157	-19.7177	1.63961	497.203	-10.3784
IL1RN	79.5897	29361.6	68.0188	8423.5	11.5709	1.80144	85.9288	-7.01727
LOC112448791	54.5666	121.785	69.4354	17.5694	-14.8689	2.7932	310.628	-10.2434
EHBP1	67.6676	135.606	50.8704	423.882	16.7972	-1.64425	206.403	-6.77556
PLEK	69.8134	6606.87	80.049	1617.27	-10.2355	2.0304	167.159	-7.26738
CAPN14	76.7282	32.675	65.9659	227.056	10.7623	-2.79679	75.1379	-7.3102
KRTCAP3	85.9251	14.4517	59.8719	121.453	26.0532	-3.07109	562.891	-12.8878
LOC112448814	67.9407	3.9039	41.7579	12.7681	26.1828	-1.70956	562.908	-10.9269
MATN3	56.5162	11.9095	33.614	5.08277	22.9022	1.22843	417.799	-10.5804
VSNL1	28.9627	2.21921	12.59	11.1882	16.3727	-2.33386	196.991	-7.58736
LOC101904759	85.3028	6.03276	66.6128	17.5462	18.69	-1.54027	263.776	-7.32696
GPR21	87.6023	43.3446	70.3435	17.3718	17.2589	1.31911	219.726	-8.04371
KYAT1	83.7417	69.2381	55.0076	34.4876	28.7341	1.00549	689.112	-13.7825
SH3GLB2	31.1208	181.692	18.292	435.658	12.8289	-1.2617	107.749	-5.34115
LOC104975788	71.519	28.7821	55.9668	133.219	15.5523	-2.21056	174.39	-7.1533
LOC100848610	75.8641	1.84594	57.8062	17.242	18.0579	-3.2235	251.238	-9.95403
PAEP	84.2951	11621.5	66.9157	544900	17.3794	-5.55113	250.331	-18.1469
ABO	73.452	57.8098	54.3836	154.434	19.0683	-1.4176	275.837	-7.36815
SURF2	27.4573	39.3793	11.7993	116.958	15.658	-1.57048	174.93	-6.35266
PTGDS	67.6481	11.3307	37.7167	47.2519	29.9314	-2.06014	755.668	-13.4949
FUT7	6.80477	20.4306	25.424	7.86618	-18.6192	1.377	448.71	-9.56916
LRRC26	75.3397	12.0345	44.9808	151.452	30.3589	-3.65362	787.928	-16.6682
TMEM210	73.2635	3.47505	28.4331	14.7137	44.8304	-2.08205	1794.88	-25.7916
LOC104973517	86.7995	54.2916	70.8248	127.986	15.9747	-1.23718	182.524	-6.17042
LOC107132971	18.1756	19.3263	8.07465	74.1285	10.101	-1.93946	60.8521	-5.60125
NRARP	28.0013	50.3582	17.639	381.689	10.3623	-2.9221	69.3742	-7.55202
LOC112449179	78.0381	4.23542	63.5176	9.41888	14.5205	-1.15305	145.297	-5.69119
ARL11	54.2349	430.811	69.0763	167.458	-14.8414	1.36325	303.307	-7.88484
MAB21L1	42.6914	3.39887	27.9558	15.8726	14.7357	-2.22341	153.807	-6.95994
LOC107132980	84.8812	6.84293	61.2956	91.2108	23.5856	-3.73652	457.114	-13.3707
SPATA13	45.5427	405.706	34.2144	1248.27	11.3283	-1.62142	79.957	-5.38011
EDNRB	87.6387	2673.67	71.8931	925.951	15.7456	1.52982	178.037	-7.84032
LOC107131218	81.221	3.2106	50	9.86514	31.221	-1.6195	826.568	-13.9693
LOC112449072	78.5714	9.01637	89.4236	155.739	-10.8522	-4.11044	194.205	-14.7737
LOC104970698	74.1671	1.81979	54.1679	7.30034	19.9991	-2.00419	309.365	-8.32788
LOC101905776	46.066	17.3152	68.8814	5.26556	-22.8153	1.71738	644.78	-12.1615
LOC112449372	83.129	1.49405	71.8193	7.30925	11.3097	-2.29049	82.0485	-6.36228
LOC101904563	67.7375	59.2501	49.8529	5.73559	17.8846	3.3688	248.797	-13.9616
CST7	33.5893	68.5663	63.1446	166.734	-29.5553	-1.28198	1029.38	-18.1903
LOC112449301	38.0648	68.7853	66.8519	19.0066	-28.7871	1.8556	983.435	-16.246
LOC107133053	50.4512	83.6226	67.1338	10.0772	-16.6826	3.0528	378.55	-11.5549
LOC101902869	58.7512	14.0621	76.8943	6.0439	-18.1431	1.21826	428.358	-9.20895
LOC104973826	82.063	437.621	71.45	171.155	10.613	1.35438	67.9409	-5.93702
SIRPB1	72.0208	971.863	59.7393	371.558	12.2815	1.38717	97.8695	-6.43313
RBBP8NL	75.0643	8.76684	44.772	41.4622	30.2923	-2.24167	776.317	-13.9361
HCK	33.9551	2209.35	21.1906	519.769	12.7645	2.08768	110.185	-8.01146
LBP	79.4881	21.2835	64.1892	146.63	15.2989	-2.78437	170.541	-8.16296
LOC112449414	65.9664	9.80876	89.2072	1.45509	-23.2408	2.75297	671.448	-14.0371
LOC100847835	83.9395	38.1787	56.0875	6.85839	27.852	2.47682	649.186	-16.7969
LOC112449349	15.058	105.35	25.1294	45.9291	-10.0713	1.1977	160.065	-6.11662
LOC101907931	61.71	3.92058	48.4829	18.0631	13.2271	-2.20391	119.112	-6.5761
LOC112449354	68.6794	2.45929	54.2926	15.5921	14.3868	-2.6645	147.424	-7.6906
SCX	89.6631	21.6394	75.2852	128.875	14.3778	-2.57424	146.764	-7.50638
LOC101903326	49.292	14.7565	31.2388	32.493	18.0531	-1.13878	242.615	-6.81086
EEF1D	49.5477	352.802	32.6858	945.115	16.8619	-1.42163	207.641	-6.58996
LOC104973986	76.3999	21.5202	64.8764	7.33277	11.5235	1.55326	84.1654	-6.51708
LOC112449616	68.0752	17.3721	81.7532	8.44034	-13.678	1.0414	263.42	-7.16949
LOC107133108	67.3214	139.007	83.4224	21.0412	-16.101	2.72387	354.565	-10.5476
LOC112449619	73.9407	11.3766	49.2562	5.65921	24.6845	1.0074	493.11	-11.2031
FBXO32_1	85.4165	115.719	72.658	309.104	12.7585	-1.41746	106.672	-5.4579
RP1	81.4405	3.79209	68.1807	9.28911	13.2598	-1.29255	116.899	-5.46645
PI15	69.1231	12.719	45.3154	163.061	23.8076	-3.68036	466.126	-13.3107
LOC104974070	52.8578	13.6259	67.4421	4.05999	-14.5842	1.7468	295.755	-8.22719
NCALD	67.5652	30.945	48.4444	128.818	19.1208	-2.05755	279.612	-8.06661
MATN2	43.2472	3.79906	23.8401	14.5902	19.4071	-1.94128	288.776	-8.02139
TP53INP1	33.7268	825.387	20.387	2239.23	13.3399	-1.43986	118.986	-5.61277
SLC26A7	71.2618	2.51159	84.084	8.25555	-12.8222	-1.71676	237.49	-8.47012
LOC112441605	84.5314	2238.52	72.5731	340.334	11.9583	2.71752	97.5129	-9.43878
CRYAB	39.0668	265.918	20.0289	776.772	19.0379	-1.54651	275.173	-7.46238
HSPB2	41.6017	6.53067	21.561	28.3975	20.0407	-2.12046	311.264	-8.50014
C15H11orf52	78.0416	7.0446	53.1503	17.6737	24.8913	-1.32701	502.378	-9.96623
C15H11orf34	79.6869	11.7389	63.5641	4.25564	16.1228	1.46385	187.948	-7.8579
NXPE2	76.5349	4.66419	63.3603	50.0269	13.1747	-3.42301	124.488	-9.28722
FXYD6	61.5106	132.003	45.4495	570.571	16.0612	-2.11184	187.528	-7.14318
CD3D	85.506	193.798	63.129	444.057	22.377	-1.19619	395.855	-8.64341
CD3G	85.506	152.048	63.129	429.24	22.377	-1.49726	396.576	-8.82552
TTC36	80.1921	1.66715	66.4766	13.4206	13.7155	-3.00899	133.779	-8.31283
LOC112441628	67.1775	8.10374	53.438	19.9259	13.7395	-1.29798	127.456	-5.58846
ST5	36.8871	35.6145	25.9182	224.998	10.969	-2.65937	77.8829	-7.03523
LOC407145	83.8183	34.378	65.3339	12.2294	18.4844	1.49113	257.918	-8.88881
FOLR3	90.2731	9.11411	76.1164	313.05	14.1567	-5.10215	160.217	-15.4798
PDE2A	64.6951	26.5322	50.6836	55.3469	14.0115	-1.06076	133.15	-5.49919
ARAP1	57.6916	2277.58	32.0061	1046.87	25.6855	1.12142	538.786	-12.0038
NEU3	44.2923	636.846	33.3125	277.41	10.9798	1.19893	73.5788	-5.7839
MUC15	59.9709	149.155	40.3941	4534.09	19.5769	-4.92593	314.151	-15.9918
ELF5	64.1343	512.846	42.9476	14921.3	21.1866	-4.86271	371.095	-16.2581
EHF	60.7573	518.188	28.2342	6403.69	32.5232	-3.62736	912.979	-17.9727
LOC112441652	76.3595	4.04556	52.6373	16.9189	23.7222	-2.06422	453.689	-10.0258
LARGE2	67.4763	20.2186	34.4087	51.5465	33.0677	-1.35019	935.304	-15.1487
SPI1	59.9939	3538.13	83.3435	1620.06	-23.3496	1.12694	670.27	-12.0069
LOC104974328	51.51	16.4006	34.6879	3.60481	16.8221	2.18576	210.328	-9.75112
LOC506121	83.4951	75.2468	71.5501	15.9297	11.945	2.23991	94.7515	-8.1308
SERPING1	84.3566	26.3925	69.3794	85.4304	14.9772	-1.69462	157.859	-6.29242
LOC613282	80.0281	1.20495	67.2205	10.9497	12.8076	-3.18386	115.283	-8.57553
B3GAT1	45.3848	2.64906	31.2504	15.7813	14.1344	-2.57467	141.047	-7.45111
MYBPH	88.1902	151.834	78.1861	37.3764	10.0041	2.0223	60.8957	-7.08431
CNTN2	60.5746	4.75554	45.2394	10.0164	15.3353	-1.07468	165.383	-5.8786
RHEX	67.6248	71.618	84.8207	28.6717	-17.1959	1.3207	390.424	-8.84738
PIGR	86.7605	241.43	75.4141	5825.89	11.3464	-4.5928	97.8595	-12.9862
FCAMR	73.9162	6.60783	57.3838	80.0958	16.5323	-3.59948	208.576	-10.5307
LOC515150	89.1921	28.2107	78.917	12.704	10.2751	1.15095	62.009	-5.5454
HHIPL2	80.4673	42.1989	56.6438	786.375	23.8235	-4.21994	470.904	-14.9494
LOC112441819	73.7731	5.33904	44.2873	32.9398	29.4857	-2.62518	733.902	-13.9799
LOC112441821	87.1523	4.19451	69.0222	10.9073	18.1301	-1.37872	245.548	-6.99115
EPHX1	76.0442	31.2394	49.9258	152.83	26.1184	-2.29049	562.014	-11.5435
LOC112441824	91.1427	2.09222	72.6834	7.60491	18.4593	-1.86189	257.363	-7.57796
XCL1	85.8894	2.75167	71.5245	24.0407	14.3649	-3.1271	149.446	-8.73994
SELP	58.9804	7.76925	71.8075	3.10936	-12.8271	1.32116	237.342	-7.09739
SELL	59.9962	2890.28	49.6124	930.665	10.3839	1.63487	65.2015	-6.37553
CTNNBIP1	13.6526	41.4343	30.3539	84.3697	-16.7013	-1.0259	369.789	-9.16325
TNFRSF9	81.6185	24.7851	69.7996	241.367	11.8189	-3.28369	96.5112	-8.6779
LOC104974459	88.1552	29.3874	65.6132	14.2287	22.542	1.0464	402.767	-10.067
MXRA8	69.3876	11.9209	42.8952	33.624	26.4924	-1.496	577.043	-10.9417
CELA2A	40.9239	25.737	61.0747	4.17668	-20.1508	2.62341	521.128	-12.1288
LOC107133260	86.2308	3.51966	61.3007	34.9599	24.93	-3.31219	512.732	-12.8765
FAM129A	33.031	2948.25	22.0828	1179.49	10.9482	1.3217	73.3897	-5.96677
LOC104974508	65.2472	8.88833	80.7573	3.60694	-15.5101	1.30114	326.774	-8.09759
PLA2G4A	17.1128	119.306	34.1394	45.4633	-17.0266	1.39189	383.994	-8.83491
G0S2	41.5402	1498.62	26.3264	309.008	15.2139	2.27792	167.313	-9.34469
LAMB3	73.2562	230.922	87.3686	73.7919	-14.1124	1.64587	279.476	-7.91998
LOC112441876	70.3385	9.86198	46.9035	3.88145	23.435	1.34528	440.147	-11.099
LOC104974542	76.0335	57.1816	59.5418	126.878	16.4917	-1.14982	196.531	-6.27969
ELF3	80.2803	77.8964	52.6021	179.826	27.6782	-1.20698	634.634	-11.495
LOC104974562	83.4037	47.0433	61.1902	22.4507	22.2135	1.06723	389.765	-9.92743
LOC100297399	79.535	2.11838	51.1049	20.738	28.4301	-3.29125	681.803	-14.6579
SLC7A11	38.4236	940.478	27.3695	429.407	11.0541	1.13105	74.6646	-5.70288
LOC527744	64.5921	3267.62	75.6416	772.37	-11.0495	2.08087	188.79	-7.57588
LOC101904098	60.4485	65.3039	85.3508	31.7488	-24.9023	1.04047	752.768	-12.9543
TMEM233	61.477	7.18932	72.6303	79.9902	-11.1532	-3.4759	197.714	-12.4947
CFAP73	88.6447	1.4099	72.3095	7.56028	16.3352	-2.42285	196.35	-7.73124
OAS1Y	85.4441	539.246	71.2554	242.784	14.1887	1.15127	138.116	-6.63529
LOC104974701	32.3158	10.0801	46.381	3.81328	-14.0652	1.40241	277.094	-7.62499
SLC5A1	82.9857	19.012	66.805	148.495	16.1808	-2.96543	194.864	-8.79456
LOC112442080	59.3061	25.8221	42.7492	8.26596	16.5569	1.64335	200.568	-8.38228
SLC7A4	56.917	43.0658	33.7802	643.745	23.1369	-3.90188	439.615	-13.6612
LOC100848324	26.8928	9.14539	13.1004	73.5993	13.7924	-3.00858	135.506	-8.3277
LOC100295712	69.7803	3.20732	46.7497	6.53941	23.0305	-1.02779	421.925	-8.89476
CCDC188	80.6551	4.39176	65.6382	13.6656	15.017	-1.63767	158.678	-6.24053
IL34	71.4826	6.27662	42.1903	16.7765	29.2924	-1.41839	718.986	-12.5842
ATP2C2	67.6494	74.2629	55.5528	964.381	12.0966	-3.69889	104.535	-9.92537
LOC112442264	13.3369	4.38698	26.8118	13.9505	-13.4749	-1.66902	257.783	-8.66386
ZFPM1	34.494	8.1341	50.1441	31.8041	-15.6501	-1.96716	333.043	-10.2963
CBFA2T3	27.8082	107.943	53.0208	52.2579	-25.2126	1.04654	769.89	-13.1615
ADGRG1	83.8851	169.547	69.5102	398.539	14.375	-1.23303	141.988	-5.70518
CDH16	83.2734	5.75221	70.6628	65.3832	12.6106	-3.50673	113.329	-9.42887
ELMO3	77.8373	58.1227	62.6507	154.485	15.1866	-1.4103	162.326	-6.06856
AGRP	75.7723	1.98811	58.6557	6.05266	17.1166	-1.60617	215.521	-6.84036
GPI	47.4381	7044.07	28.084	2915.47	19.3541	1.27268	285.794	-8.87162
HPN	72.4723	14.0476	42.7621	184.369	29.7101	-3.7142	752.642	-16.4389
TYROBP	27.8879	2041.36	62.327	900.158	-34.4391	1.18128	1366.89	-20.3833
RINL	63.7356	54.132	74.3229	119.488	-10.5873	-1.14231	172.488	-6.68653
LRFN1	59.3321	232.126	37.7962	81.3384	21.5359	1.5129	364.802	-10.4061
GMFG	66.7911	748.645	78.0363	363.837	-11.2451	1.04099	190.578	-6.33206
LOC100848419	67.1358	244.547	77.2484	103.928	-10.1126	1.23452	161.207	-6.16333
CXCL17	71.1139	2.93794	52.3852	13.7101	18.7287	-2.22236	267.393	-8.16392
CEACAM19	70.0237	9.61656	33.3908	63.2229	36.6329	-2.71685	1171.07	-19.125
LOC101904248	34.335	67.1478	22.0647	23.9042	12.2703	1.49008	97.9775	-6.6107
GPR4	53.5984	242.166	37.9596	65.3901	15.6389	1.88885	176.557	-8.55478
C5AR2	83.4925	1098.89	64.2697	534.029	19.2227	1.04106	280.78	-8.42344
DHX34	95.2094	578.78	85.1695	246.393	10.0398	1.23205	58.6265	-5.61091
EMP3	18.9684	845.174	34.0568	393.904	-15.0884	1.10141	311.214	-7.76392
LOC112442349	16.7727	76.2105	33.6474	14.5878	-16.8747	2.38523	382.129	-10.1672
LHB	70.1186	3.33139	47.0977	9.73989	23.0209	-1.54778	422.713	-9.16675
SLC6A16	88.6529	3.38611	68.1472	9.21252	20.5057	-1.44397	325.576	-7.96231
LOC618268	93.2086	116.428	79.4778	44.4778	13.7308	1.38828	128.3	-6.87571
NLRP12	53.834	167.532	69.7016	69.2573	-15.8676	1.2744	339.708	-8.22384
LOC506868	83.1982	15.786	68.3363	7.64527	14.8619	1.04601	154.032	-6.70307
LOC513941	87.5044	18.1083	76.1444	3.54753	11.3599	2.35176	84.5991	-8.24388
SSC5D	82.7109	18.2803	67.2131	37.3568	15.4978	-1.03108	169.5	-5.90503
TMEM150B	27.2329	154.954	60.3644	54.3049	-33.1315	1.51269	1272.97	-19.3938
EPS8L1	58.0045	93.4303	36.703	207.016	21.3015	-1.14778	354.174	-8.12893
LOC100336589	75.5358	761.097	65.5152	206.423	10.0207	1.88247	60.5571	-6.78328
LOC100852077	71.0151	377.386	56.2055	91.9151	14.8095	2.03767	156.094	-8.59056
KIR2DL5A	82.3928	9.41881	59.0435	124.303	23.3493	-3.72218	447.108	-13.2284
KIR3DS1	61.4767	9.70962	47.1711	28.7658	14.3056	-1.56687	141.182	-5.97664
LOC100852061	59.3125	1	48.2571	11.0776	11.0554	-3.46957	84.0773	-9.09457
LOC104974955	47.7852	9.18643	29.4303	2.30566	18.355	1.99432	255.702	-9.94099
LOC407171	43.9174	2369.49	56.7047	628.461	-12.7872	1.91468	238.218	-7.83291
LOC107131323	79.1183	4004.63	61.2381	839.127	17.8803	2.25471	242.066	-10.3928
LOC112442224	50.728	14.3057	71.1708	4.34907	-20.4428	1.71781	530.247	-10.8424
TMC4	60.6648	85.4695	33.0585	193.118	27.6063	-1.176	630.955	-11.4418
DYNLL2	69.7806	564.848	53.4513	1512.5	16.3293	-1.421	192.633	-6.41914
LOC112442599	74.0464	1.4099	46.8604	15.6746	27.186	-3.47477	620.041	-14.4121
LOC112442606	85.5549	1.16212	61.7281	8.49165	23.8268	-2.86929	461.869	-11.3835
CCL3	46.8555	2107.92	60.5698	543.305	-13.7142	1.95599	267.608	-8.21231
LOC504773	32.3163	243.142	46.4436	90.653	-14.1273	1.42337	279.222	-7.66999
LOC508666	63.4365	3745.52	75.3423	1458.96	-11.9058	1.36022	210.049	-6.82941
CCL2	57.5799	15533.3	32.7716	3783.93	24.8082	2.03741	502.055	-13.5087
LOC112442613	83.4335	66.4473	67.7043	25.4278	15.7292	1.3858	177.141	-7.56537
EVI2B	52.8107	4736.57	63.1252	2008.95	-10.3144	1.2374	166.35	-6.22314
WSB1	36.3614	4950.19	26.2717	1594.6	10.0897	1.63429	60.6522	-6.30348
NOS2	77.0969	5433.44	66.423	1122.22	10.6739	2.27551	72.5496	-7.8583
SLC13A2	84.8065	2.47446	71.408	11.943	13.3985	-2.27098	123.095	-6.72615
RPL23A	40.2594	3401.9	22.9265	7787.56	17.3329	-1.19483	220.855	-6.58722
TRPV1	78.048	146.974	59.4404	67.2469	18.6075	1.12802	260.808	-8.28912
ITGAE	90.1193	101.889	78.3825	342.246	11.7367	-1.74803	87.7182	-5.60931
GLTPD2	70.466	15.0495	58.8249	64.6146	11.6411	-2.10214	87.2204	-6.09952
TM4SF5	47.5064	6.44571	65.3999	30.1179	-17.8935	-2.22421	420.55	-12.1008
ALOX12E	79.7223	13.6976	63.06	35.7112	16.6623	-1.38245	201.853	-6.49364
CLDN7	79.7044	157.08	48.9979	407.322	30.7064	-1.37467	796.624	-13.4931
TMEM95	69.9808	5.44684	40.8432	12.8829	29.1375	-1.24196	710.299	-12.4133
SLC35G6	32.8125	3.79979	10.0793	9.4699	22.7332	-1.31743	410.403	-8.87456
LOC112442805	86.1006	13.1352	72.3558	4.86823	13.7448	1.43197	128.752	-6.95752
GUCY2D	77.1043	1	51.0392	9.56759	26.0651	-3.25816	564.581	-13.3098
CACNA1G	54.7556	7.2737	32.4283	15.2965	22.3273	-1.07244	393.638	-8.56983
SP6	15.4939	11.3337	27.1894	26.9879	-11.6955	-1.2517	202.97	-7.24462
ARL5C	49.0909	11.2964	76.8102	4.02382	-27.7193	1.48923	916.405	-15.142
LOC112442663	30.9892	6.44593	15.3737	16.4257	15.6154	-1.34949	173.233	-6.14338
GRB7	84.039	59.9086	64.02	125.837	20.019	-1.07072	307.466	-7.54462
KRT10	81.6444	1.39322	65.0569	6.1908	16.5874	-2.1517	202.228	-7.35802
KRT15	80.1642	58.2946	59.8171	201.962	20.3471	-1.79265	320.918	-8.21551
KRT19	71.4174	435.41	41.6211	3790	29.7963	-3.12175	753.461	-15.0894
KRT14	85.1938	2.84353	71.4066	6.08024	13.7872	-1.09645	128.106	-5.46117
HSD17B1	85.4778	26.0335	60.5672	8.974	24.9106	1.53655	504.694	-12.3599
LOC112442858	73.078	3.44867	49.1725	7.18809	23.9054	-1.05957	458.657	-9.34332
LOC112442851	70.9137	4507.47	47.733	1181.04	23.1808	1.93226	431.672	-12.2679
LOC112442677	59.7279	287.913	73.3553	121.242	-13.6275	1.24775	262.321	-7.31431
LOC112442683	78.8517	1.62432	37.8258	15.4962	41.0259	-3.25401	1493.23	-23.7201
ZNF750	79.9844	50.0208	43.8883	181.952	36.096	-1.86296	1131.06	-17.7389
LOC100299732	88.0812	3.53633	74.8484	7.49862	13.2327	-1.08437	115.884	-5.31474
LOC101903434	89.2416	2.25584	76.4701	6.9032	12.7715	-1.6136	107.476	-5.66061
LOC781977	52.3328	54.9207	33.4354	114.073	18.8975	-1.05454	269.418	-7.08813
CD7	78.0141	22.3366	49.213	161.152	28.8011	-2.85094	698.602	-13.9619
LOC101907247	66.2628	3.84062	53.64	26.3135	12.6228	-2.77639	109.204	-7.56311
HID1	57.2035	128.166	44.6329	383.031	12.5706	-1.57945	103.293	-5.57959
CD300LF	61.8177	218.168	73.3617	51.6954	-11.544	2.07733	202.429	-7.71186
CD300A	36.4477	170.571	55.077	55.0759	-18.6293	1.63088	449.973	-9.82799
LOC112442733	69.9263	14.7825	44.9737	31.6324	24.9525	-1.09751	504.634	-9.90471
LOC112442735	89.2862	31.0369	79.0646	11.3959	10.2215	1.44547	62.0309	-5.9955
LOC112442738	87.1868	3.47683	66.7982	12.1492	20.3886	-1.80502	322.44	-8.2457
LOC112442742	84.3601	2.17018	64.9574	25.6776	19.4027	-3.56462	297.083	-11.2843
FOXI1	72.5704	2.61571	61.573	14.4671	10.9974	-2.4675	77.4379	-6.64514
LOC112442975	22.5334	19.1659	49.7986	9.01028	-27.2652	1.0889	888.005	-14.5922
TMEM171	78.7151	10.2848	52.615	103.772	26.1001	-3.33483	566.715	-13.5075
GAPT	72.1325	429.054	84.89	134.595	-12.7575	1.67254	236.368	-7.4771
GZMK	46.1118	88.1317	70.4762	43.5706	-24.3645	1.01631	723.514	-12.5953
LOC112443001	48.6445	32.9856	25.213	116.619	23.4314	-1.82189	440.568	-9.6106
CAPSL	84.1879	2.7945	72.1974	11.0392	11.9905	-1.98198	93.2692	-5.97843
LOC107131571	79.1704	2.34748	56.5983	25.9117	22.5721	-3.46442	413.542	-12.2019
LOC107131579	88.916	111.724	77.7197	34.1696	11.1963	1.70915	78.929	-6.72745
LOC101907943	63.2269	69.5348	74.4717	20.5378	-11.2447	1.75946	192.792	-7.12065
LOC101908149	28.2082	7.11072	53.0979	17.1486	-24.8897	-1.27002	751.921	-14.5486
LOC107131639	75.8083	1.81829	56.4258	8.23647	19.3825	-2.17944	288.855	-8.3355
LOC112443201	73.1937	2.31762	57.9224	9.15448	15.2713	-1.98183	166.249	-6.73448
LOC112443202	76.4082	2.41846	61.7056	7.91332	14.7026	-1.71019	151.134	-6.23651
LOC112443203	76.3806	1.62432	64.8486	6.66687	11.532	-2.03717	84.9898	-5.97802
NR2F2	37.1753	24.8276	64.2444	86.1972	-27.0692	-1.7957	877.553	-17.2697
NTRK3	86.0194	3.55351	72.9173	9.6634	13.1021	-1.44329	113.901	-5.56022
MFGE8	64.802	692.383	45.425	12802.5	19.377	-4.20871	301.029	-13.2608
FES	47.5594	761.274	35.991	304.197	11.5683	1.32341	84.2468	-6.12983
SLC28A1	85.4311	17.0578	70.3032	45.3967	15.128	-1.41215	160.847	-6.05351
CRABP1	32.5891	2.38661	56.7385	7.48793	-24.1495	-1.64961	712.902	-14.7624
LOC100848238	87.0148	3.29803	71.7366	135.514	15.2782	-5.36069	190.231	-16.8293
LOC104975377	84.7482	14.7972	73.6259	6.37785	11.1223	1.21419	76.0549	-5.84252
LOC101907132	61.9306	49.7416	80.3637	10.822	-18.4331	2.20049	444.071	-10.5277
GPR68	57.1384	24.0753	38.1513	358.786	18.987	-3.89749	285.596	-12.1283
TC2N	48.291	140.755	32.4029	553.623	15.8881	-1.97572	182.352	-6.89843
SERPINA1	76.7256	20.1892	62.2659	96.1459	14.4597	-2.25164	147.253	-6.93814
LOC786914	74.1829	2.18736	57.6769	8.02172	16.506	-1.87472	198.909	-6.9488
EXOC3L4	68.7415	4.84826	49.4462	16.9893	19.2953	-1.80909	284.553	-7.82275
LOC112443180	84.7158	12.8213	67.8912	44.5996	16.8246	-1.79848	207.671	-6.95482
VILL	82.8228	4.24131	65.8229	10.4118	16.9999	-1.29563	211.316	-6.53966
ACVR2B	58.9023	519.689	37.6772	253.932	21.2251	1.0332	351.707	-9.36384
LOC112443426	67.7251	4.78675	38.7027	56.9067	29.0224	-3.57148	714.703	-15.6699
ACKR2	76.1132	15.1192	64.4612	61.0394	11.652	-2.01336	87.081	-5.96295
FAM107A	82.1445	49.0717	59.1227	1250.27	23.0218	-4.6712	441.247	-16.2004
LOC104975561	35.5708	62.6518	52.0121	30.8358	-16.4414	1.02275	360.47	-8.28902
SEMA3F	72.2969	52.2186	52.4467	119.487	19.8503	-1.19421	301.829	-7.53296
MST1R	67.5619	10.4626	52.9037	31.4747	14.6582	-1.58894	149.688	-6.09199
CATHL3	64.8419	9.06606	81.3381	2.44815	-16.4962	1.88878	365.33	-9.18913
RTP3	78.3557	6.05449	61.1367	14.667	17.219	-1.27649	217.671	-6.60018
LOC529196	72.9125	101.808	55.7386	46.304	17.1738	1.13664	216.723	-7.7011
CCRL2	39.172	2007.14	59.2867	458.495	-20.1146	2.13016	517.001	-11.2306
LOC112443491	60.2482	140.415	70.5862	37.5752	-10.338	1.90184	169.239	-7.08149
CLEC3B	80.7055	2.71084	69.5626	8.73599	11.1429	-1.68823	76.9233	-5.42647
SLC6A1	50.6854	1.9301	32.1673	6.86068	18.5181	-1.82967	259.134	-7.56092
LOC101902219	50.5891	3.66132	65.7509	37.7206	-15.1618	-3.36492	322.585	-14.0288
LOC107131715	85.972	17.8306	69.7359	40.2234	16.2361	-1.17368	189.497	-6.21177
TREML2	59.1091	1538.95	73.2003	467.133	-14.0913	1.72004	279.045	-8.0078
MRPL14	49.0764	146.809	33.2348	339.047	15.8416	-1.20755	178.893	-6.10993
SLC29A1	36.1936	373.444	22.366	1107	13.8276	-1.56769	130.135	-5.85682
LOC615223	74.2242	4.38825	50.7523	28.4889	23.4719	-2.69868	445.967	-10.8911
SLC44A4	70.8189	26.2742	44.8483	11.5282	25.9706	1.18848	552.257	-12.3044
BOLA_1	26.8801	2775.68	47.2869	1265.02	-20.4069	1.13368	526.76	-10.3098
ZKSCAN4	48.7015	8.82342	31.4925	19.3283	17.209	-1.1313	217.07	-6.50867
BTN1A1	89.921	333.504	72.6904	11572.4	17.2306	-5.11685	241.423	-16.1566
LOC104975682	86.5927	11.7809	66.1644	196.455	20.4283	-4.05968	336.414	-13.1166
LOC112443735	69.6483	74.7965	54.6901	18.0261	14.9582	2.05289	159.842	-8.68189
LOC101902551	90.4055	3.2064	80.3918	23.1321	10.0136	-2.85087	63.6291	-7.34051
GMDS	70.8874	94.5572	56.471	292.2	14.4164	-1.6277	143.985	-6.06942
FOXQ1	49.6854	98.7469	35.5082	480.836	14.1772	-2.28374	140.718	-6.92445
LOC100848495	63.0146	3.05745	79.7753	8.54697	-16.7608	-1.48308	373.087	-9.90386
ARHGAP28	65.8468	108.159	51.7825	499.103	14.0642	-2.20618	137.768	-6.76818
CIDEA	74.711	42.0908	57.5539	376.762	17.1571	-3.16208	223.662	-9.53347
SLC14A1	77.5585	4.51496	61.4649	9.85695	16.0936	-1.12643	185.511	-6.13915
LOC101906559	54.7423	19.1081	65.3027	6.09512	-10.5604	1.64845	174.027	-6.76928
ZNF532	80.9285	65.0217	67.8208	164.577	13.1077	-1.33977	113.761	-5.4691
TNFRSF11A	74.1521	229.188	62.7051	95.212	11.447	1.26732	81.9007	-6.00797
LOC531296	76.331	14.2806	54.2071	95.4893	22.1239	-2.74128	391.484	-10.3772
LOC104975830	70.5206	10.4433	35.245	146.013	35.2756	-3.80544	1087.05	-20.3322
ZG16B	82.2704	2.17018	61.4144	42.1238	20.856	-4.27875	353.688	-13.9919
LOC616782	86.5795	684.417	67.3598	218.893	19.2197	1.64465	282.48	-9.53892
TMC5	63.7552	11.8982	48.7594	218.522	14.9958	-4.19896	172.338	-12.0843
ACSM5	71.2665	2.26532	44.1132	13.4654	27.1533	-2.57147	613.234	-12.5332
ACSM2B	73.6256	2.58628	57.5309	6.2227	16.0947	-1.26667	185.834	-6.22777
ACSM1	36.4287	1.36707	54.3478	8.41937	-17.9192	-2.62263	423.412	-13.1864
LOC101907275	85.3268	78.7358	66.1661	23.6001	19.1607	1.73823	280.855	-9.71521
C25H16orf54	54.3279	661.058	67.5303	217.019	-13.2025	1.60696	249.918	-7.54514
QPRT	40.759	12.6789	59.264	35.9334	-18.5051	-1.50289	443.405	-10.8831
PRSS8	81.602	187.142	67.6527	453.036	13.9493	-1.27549	132.161	-5.6244
LOC107131831	84.8622	1	71.7731	6.95194	13.0892	-2.79742	118.966	-7.6982
ITGAX	44.8831	2750.08	61.4922	939.642	-16.6091	1.54929	368.368	-8.81041
LOC112444301	73.2727	3.77121	34.0055	13.9866	39.2672	-1.89095	1354.23	-20.4119
ORAI2	30.4699	370.718	49.1606	170.855	-18.6907	1.11755	451.01	-9.40802
LOC112444316	79.2994	18.083	90.7395	5.65902	-11.4401	1.67601	197.895	-7.0625
LOC112444310	48.7167	463.573	60.2553	131.492	-11.5387	1.81782	201.19	-7.29333
C25H7orf61	81.1869	3.28505	59.3119	13.5485	21.875	-2.04415	378.655	-9.15331
PILRA	57.1163	1445.81	71.1968	567.202	-14.0805	1.34995	277.442	-7.57828
LOC101904258	69.7978	5.28145	47.9321	13.0402	21.8657	-1.30396	376.035	-8.46279
LOC104975911	83.0696	486.436	57.4228	140.59	25.6467	1.79076	539.137	-13.4039
BAIAP2L1	46.7584	88.4296	35.0999	253.298	11.6586	-1.51823	85.5988	-5.32825
BHLHA15	27.4175	35.5816	14.7315	572.384	12.686	-4.00778	118.474	-11.0131
LOC104975913	87.3956	2.22819	64.0028	17.4716	23.3928	-2.97107	444.12	-11.395
LOC107131857	84.2182	1	65.5438	7.51561	18.6744	-2.90989	268.96	-9.41952
LOC112444340	73.4134	3.36852	40.7755	15.1942	32.6379	-2.17333	911.881	-15.4319
MICALL2	35.6653	20.9609	18.5012	87.29	17.1641	-2.05812	218.433	-7.39881
PRKAR1B	56.644	11.9386	44.1075	65.1494	12.5365	-2.44812	105.848	-6.87105
PAPSS2	45.3802	2694.67	33.269	1246.74	12.1111	1.11195	93.7987	-5.95158
ACTA2	51.7429	155.745	39.8942	42.7886	11.8486	1.86389	91.2875	-7.22798
CH25H	51.126	266.248	39.9783	32.237	11.1476	3.04599	84.8393	-10.208
PLCE1	20.0076	52.8767	8.72119	158.449	11.2864	-1.58332	79.1089	-5.32906
PYROXD2	58.7075	10.9238	43.0834	26.9239	15.6241	-1.30141	173.347	-6.10924
HPSE2	52.2947	4.97147	37.1554	41.7834	15.1393	-3.07119	168.079	-8.77971
PAX2	54.7957	16.435	65.873	33.3995	-11.0773	-1.02306	185.34	-6.7154
GSTO1	59.5693	96.7234	78.8626	37.2488	-19.2933	1.37667	477.646	-9.90467
LOC104975979	74.8645	9.89989	44.6007	23.6153	30.2638	-1.25424	771.576	-13.1528
PDCD4	55.5894	524.663	44.876	1666.73	10.7135	-1.66756	69.6281	-5.3279
GPAM	87.9809	443.861	70.2675	6750.22	17.7134	-3.92675	245.464	-11.8407
PLEKHS1	75.325	25.6403	59.8	63.6494	15.525	-1.31173	170.781	-6.0875
LOC112444488	71.7019	121.286	88.2434	41.5269	-16.5415	1.5463	365.775	-8.77777
BNIP3	89.2394	2052.83	76.3511	624.911	12.8883	1.71589	111.216	-7.22909
ENPP6	81.833	5.60568	58.3581	12.8236	23.4748	-1.19384	440.678	-9.1743
LRP2BP	60.1709	87.0786	33.2749	24.6993	26.896	1.81785	598.614	-14.2803
MTUS1	78.2296	164.38	63.9889	468.134	14.2407	-1.50989	139.496	-5.90285
LOC104976076	73.201	2730.5	58.7534	441.303	14.4476	2.62932	150.258	-10.0328
TCIM	70.558	55.3332	46.7733	261.431	23.7847	-2.24021	457.052	-10.2896
DKK4	48.231	18.1532	60.6699	3.64953	-12.4389	2.31444	229.492	-8.41555
LOC112444727	84.6131	3.98428	60.6938	8.58312	23.9192	-1.10718	459.338	-9.36543
LYST	34.1866	10380.6	23.5378	4274.95	10.6489	1.27992	68.3054	-5.82668
LOC104970913	63.8257	6.90791	44.725	18.5199	19.1008	-1.42276	276.926	-7.38448
PHYHIPL	67.9811	10.1919	51.8195	429.683	16.1616	-5.39778	213.961	-17.1699
ANK3	65.0221	96.7449	30.5495	643.708	34.4727	-2.73415	1028.39	-17.5084
LOC112444761	46.6432	1.43605	36.2386	7.27527	10.4046	-2.3409	67.1544	-6.3166
DNAJC12	78.9715	146.914	66.3741	4226.22	12.5974	-4.84633	123.854	-14.1622
SRGN	36.748	30178.5	55.467	13750.1	-18.719	1.13408	452.254	-9.43273
HKDC1	80.2837	15.4813	69.5226	6.34174	10.7611	1.28758	70.1674	-5.86604
LOC112444743	67.9342	6.03034	29.8204	37.8712	38.1138	-2.65079	1273.99	-20.2239
LOC112444774	66.4662	87.0091	47.6879	22.6749	18.7783	1.94007	269.066	-10.0038
LOC107131942	75.0558	1652.73	63.9436	365.958	11.1122	2.1751	79.422	-7.73075
LOC107131941	67.3614	996.139	38.1573	175.098	29.2041	2.50818	719.71	-17.8739
LOC112444740	59.1816	51.8503	76.3804	20.2927	-17.1988	1.35339	390.633	-8.87746
PLAU	53.955	2327.37	71.3326	1001.73	-17.3775	1.2162	397.318	-8.84578
PTPN20	66.9606	2.02324	45.7841	6.73297	21.1764	-1.73458	351.006	-8.49939
WDFY4	62.9029	6183.25	79.9729	2571.91	-17.07	1.26553	385.318	-8.74375
LOC112444846	78.0574	155.551	53.8929	54.6043	24.1645	1.5103	471.733	-11.8577
FAM181B	83.9009	4.06602	65.0141	16.67	18.8868	-2.03556	271.809	-7.95174
LOC112444864	82.0948	4.00273	49.1269	8.7702	32.9678	-1.13162	928.736	-15.0264
NAV2	73.0151	218.516	84.4312	472.671	-11.4161	-1.1131	194.827	-6.95152
MS4A8	90.5083	233.044	64.5833	96.1914	25.925	1.27662	550.362	-12.4455
PAG11	68.0133	10.5854	50.3076	2.40775	17.7056	2.13631	236.173	-10.0051
LOC104976804	88.1262	31983.6	65.0733	9082.82	23.053	1.81612	425.933	-11.9099
OVOL1	85.0062	28.8558	72.0898	137.163	12.9164	-2.24896	112.735	-6.58661
LOC508879	30.7235	52.7321	46.6078	625.727	-15.8843	-3.56878	349.996	-15.1551
TPCN2	68.3669	728.854	38.4175	257.258	29.9494	1.50241	755.725	-15.6568
LOC112444899	75.7108	1.55534	49.8305	7.63252	25.8803	-2.29493	550.847	-11.4229
LOC112444897	60.7253	27.0653	48.9035	80.1504	11.8217	-1.56626	88.7459	-5.41147
LOC112444889	43.6481	63.7308	61.9719	21.3182	-18.3237	1.57991	436.971	-9.62525
TSPAN32	20.9394	1555.7	7.49621	506.508	13.4432	1.61891	122.69	-7.21052
POLR2L	21.9643	90.7971	35.0797	195.592	-13.1154	-1.10713	245.026	-7.61694
LOC112444888	72.1293	3.13742	35.8819	6.97968	36.2474	-1.15358	1139.32	-17.5832
CRACR2B	77.8494	5.9218	50.1348	40.129	27.7145	-2.76054	642.166	-13.1713
SIGIRR	56.8315	38.9231	41.415	87.8156	15.4165	-1.17385	167.666	-5.96026
LOC613699	92.375	79.3054	73.5833	26.6379	18.7917	1.57394	268.108	-9.19359
AVPR2	45.2553	5.79724	60.9677	95.3487	-15.7124	-4.03978	347.144	-16.9131
DCX	54.2652	16.0162	40.9952	43.3189	13.27	-1.43546	117.466	-5.59213
PGK1	79.9492	5609.19	69.1448	2187.72	10.8044	1.35837	71.0925	-5.99056
VSIG4	44.7288	1494.19	66.5137	447.194	-21.785	1.7404	593.742	-11.597
TSPAN7	77.1458	14.9932	65.2701	7.26235	11.8756	1.0458	89.1692	-5.79463
LOC107132077	28.5111	22.4699	57.5006	4.61708	-28.9895	2.28294	998.036	-16.9329
CXHXorf21	79.7677	251.404	65.5245	121.488	14.2432	1.0492	139.137	-6.50114
ACE2	55.2023	3.98706	68.1215	20.0932	-12.9193	-2.33331	242.791	-9.85559
LOC104970628	65.9095	2.13505	46.7219	14.603	19.1876	-2.77392	285.084	-9.30783
BDA20	77.3686	1.48635	65.1393	6.96278	12.2293	-2.22788	98.8169	-6.41518
ARSH	66.9789	3.20112	53.9454	10.0356	13.0334	-1.64847	113.023	-5.75782
LOC790255	57	2216.95	33	944.527	24	1.23091	463.786	-11.2018
LOC112445543	74.5757	15.4262	61.376	33.4505	13.1997	-1.11664	115.239	-5.32656
LOC112445619	78.03	6.14913	63.7521	12.4703	14.278	-1.02005	139.279	-5.54896
LOC107131259	73.822	10.3516	37.9312	54.1486	35.8908	-2.38707	1119.39	-18.0904
LOC112445648	83.1809	17.9146	64.0332	46.4819	19.1477	-1.37553	278.366	-7.36751
LOC100139209	83.9583	448.285	66.3611	117.941	17.5972	1.92634	231.974	-9.44144
LOC509854	82.5932	4.51546	71.57	14.0672	11.0232	-1.63939	74.7225	-5.34676
LOC112445756	23.3866	5.25138	63.0349	10.6799	-39.6484	-1.02412	1777.97	-27.3584
LOC112445785	84.5185	7.50025	65.8043	1171.54	18.7142	-7.28726	313.585	-28.0077
LOC101910148	75.6867	3.96432	61.0183	8.26397	14.6684	-1.05976	148.692	-5.67777
LOC618686	25.974	6.63662	44.0598	15.7324	-18.0857	-1.24522	425.327	-10.2106
LOC112441535	80.1939	114.579	51.6698	50.9167	28.5241	1.17013	678.55	-13.9441

## Sheet: TableS10B_FirstExon_DMEGs
Table S10B List of identified differentially methylated (first exon) and expressed genes (DMEGs)
gene_ID	SCpositivemethmean	SCpositiveexpmean	controlmethmean	controlexpmean	first exon methylation change	gene expression change	var	GMM_score
LOC112447120	20.3479	696.045	36.3311	131.702	-15.9832	2.40191	293.326	-7.98829
LOC100848368	17.85	17.8224	64.35	3.64312	-46.5	2.29044	2257.71	-17.9685
CLDN8	68.8724	13.6645	31.2771	351.137	37.5953	-4.68353	1363.25	-18.4218
LOC104970784	21.6667	53.2095	62.875	11.802	-41.2083	2.17265	1782.95	-15.2257
LOC112447289	30	8.43582	71.875	2.07383	-41.875	2.02423	1838.94	-15.3593
STX19	73.7083	5.89237	34.2708	60.5516	39.4375	-3.36125	1491.4	-15.233
COL8A1	6.0625	3.11546	16.75	6.92653	-10.6875	-1.15269	136.51	-5.68303
ZBED2	77.4583	4.31621	62.2288	10.0122	15.2295	-1.21392	204.963	-5.51018
CCDC80	100	196.837	88.375	45.3947	11.625	2.1164	119.017	-7.88414
SLC15A2	72.0833	10.6365	32.5	128.372	39.5833	-3.59323	1504.19	-15.8369
MUC20	74.4545	18.5316	33.122	162.306	41.3324	-3.13066	1639.41	-15.5182
LOC104970904	77.2098	1.36707	28.5	8.8978	48.7098	-2.70237	2287.26	-18.2827
LOC104970906	7.25	7.78535	41.75	2.23749	-34.5	1.79888	1260.69	-11.9533
LOC101906248	9.125	20.8563	38.375	8.47645	-29.25	1.29895	914.303	-9.62174
BCL6	53.925	6197.96	34.6881	2529.89	19.2369	1.29272	336.378	-7.77667
LOC100847171	30.0267	1784.24	13.6693	495.527	16.3574	1.84828	241.279	-8.23374
LOC101906451	86.4797	4.59762	66.3041	15.9322	20.1756	-1.79298	372.224	-6.90189
MASP1	89.1667	9.02737	58.5222	109.962	30.6444	-3.60655	893.56	-12.8861
LOC101907683	83.8614	2.50212	55.8739	7.04992	27.9875	-1.49446	732.687	-8.5531
LOC112447727	87.6903	3.05745	67.5943	6.72885	20.0959	-1.13803	367.44	-6.33652
LOC104970977	63.5833	1.66715	38.25	33.4223	25.3333	-4.32536	611.868	-13.8649
PTX3	2.8125	309.457	13.082	133.402	-10.2695	1.21396	127.793	-5.3855
CPA3	17.1042	51.8551	63.5667	15.6849	-46.4625	1.72511	2251.72	-17.3948
LOC104971030	50.375	4.70501	68.9375	10.229	-18.5625	-1.1204	381.797	-7.32814
IGSF5	58.9911	24.7967	24.8527	119.635	34.1384	-2.27042	1105.79	-11.3236
LOC101907799	71.2836	32.8054	34.2661	9.93499	37.0175	1.72334	1304.15	-15.3858
TFF3	75.475	32.1634	49.125	1382.31	26.35	-5.42552	672.88	-18.5367
LOC101906512	68.8958	3.80307	37.875	23.2555	31.0208	-2.61234	910.162	-10.805
LOC107132224	14.744	181.247	66.3298	44.0584	-51.5857	2.04047	2765.09	-20.5239
LOC107132226	11.2625	21.6876	32.3393	5.06769	-21.0768	2.09747	490.342	-8.32827
LOC112448102	66.625	2.52827	30.5	8.85109	36.125	-1.8077	1239.84	-11.5806
MSTN	73.5786	4.93434	37.2627	23.1218	36.3159	-2.22833	1254.88	-12.0726
SP5	16.0212	3.32241	32.7835	9.29968	-16.7623	-1.48495	315.618	-7.44906
NOSTRIN	78.0058	14.5506	40.039	201.291	37.9668	-3.79013	1383.31	-15.7377
CSRNP3	44.8083	9.5535	23.9417	20.4874	20.8667	-1.10064	397.47	-6.48413
GALNT5	53.4408	11.3826	38.1295	29.4245	15.3113	-1.37019	207.662	-5.64491
TNFAIP6	47.6875	109.737	57.75	29.9271	-10.0625	1.87453	125.424	-6.29201
LOC112442666	70.0625	23.4803	85.375	8.96788	-15.3125	1.38861	266.919	-6.2477
LOC112442668	40.6607	21.7124	60.4661	4.39169	-19.8054	2.30567	436.918	-8.44343
MAP3K19	86.25	8.82357	49.875	19.309	36.375	-1.12984	1255.69	-11.3746
NCKAP5	20.8295	5.25338	9.58609	31.5977	11.2435	-2.5885	111.859	-7.05575
LOC104971266	52.125	41.0427	41.875	10.4115	10.25	1.97895	90.9555	-7.31167
LOC112442949	61.1186	240.114	73.6879	103.995	-12.5693	1.2072	184.682	-5.65067
RFTN2	87.375	12.4257	71	187.197	16.375	-3.91316	252.028	-11.1281
FZD7	29.0922	89.2408	10.6026	279.372	18.4896	-1.64641	309.787	-6.42471
C2H2orf80	60.375	8.65739	30.375	243.231	30	-4.81225	865.503	-16.7019
TNS1	88.7411	1215.58	65.9063	413.146	22.8348	1.55692	481.723	-9.33633
LOC104971307	94.0833	74.7051	80.975	23.625	13.1083	1.66089	151.023	-7.12175
SLC11A1	7.5625	3259.3	31.9833	960.699	-24.4208	1.76241	647.469	-8.63366
LOC112443124	79.928	3.32241	66.5347	19.7744	13.3933	-2.57333	160.653	-7.1953
IRS1	66.4734	165.27	54.3537	1127.93	12.1198	-2.77078	131.586	-7.52587
LOC112443144	23.2708	8.56581	39.7292	4.23657	-16.4583	1.01569	304.501	-6.10109
FAM167B	87.3864	78.9286	60.4515	15.7764	26.9348	2.32278	681.162	-12.7676
SFN	84.0726	61.4553	59.9824	295.01	24.0902	-2.26315	539.815	-8.37004
LOC104971374	80.1289	120.828	69.713	58.2949	10.4159	1.05152	90.9848	-5.60271
KLHDC7A	73.8842	36.8908	47.4763	336.875	26.4079	-3.19088	657.226	-10.7335
LOC112443471	63.879	10.3498	48.5995	37.6075	15.2796	-1.86141	208.194	-6.18303
PADI1	58.3711	2.04939	25.5371	12.7638	32.834	-2.6388	1022.62	-11.4276
CD247	15.7083	182.795	26.2917	509.059	-10.5833	-1.4776	134.855	-6.13189
GPA33	60.625	3.52914	31.25	9.79728	29.375	-1.47307	809.577	-8.96464
FCGR3A	14.0625	668.782	49.5625	146.735	-35.5	2.18832	1334.26	-12.8255
FCER1G	13.0495	5825.39	56.8607	2098.35	-43.8112	1.4731	2006.45	-15.8596
LOC781726	90.25	103.594	79.8333	33.0721	10.4167	1.64725	92.7822	-6.62062
LOC100849046	85.625	55.878	63.125	118.9	22.5	-1.0894	465.168	-6.85569
LOC100850659	64.375	7.7545	54.25	72.8076	10.125	-3.23098	93.6406	-8.60087
SEMA4A	85.75	3919.98	51.125	1032.11	34.625	1.92525	1138.11	-14.8156
RAB25	71.8344	40.5987	31.8498	186.334	39.9846	-2.19839	1527.69	-13.5232
MUC1	82.4769	112.35	49.7833	2124.63	32.6935	-4.24113	1024.23	-15.3649
RAB13	81.6157	14.4526	71.1266	92.1849	10.489	-2.6732	97.3215	-7.19737
S100A7	41.5938	5.09645	66.9375	10.8987	-25.3438	-1.09659	692.414	-9.34959
PGLYRP4	37.4948	19.1448	25.2702	7.14106	12.2246	1.42275	129.516	-6.49384
LOC507527	65.5625	11.4779	39.1333	3.87282	26.4292	1.56741	651.981	-10.5496
RORC	32.75	23.2046	18.25	83.9045	14.5	-1.85434	186.441	-6.07296
TMOD4	50.363	16.7791	36.7729	242.779	13.5901	-3.8549	173.45	-10.7073
TNFAIP8L2	8.79167	522.034	41.2083	194.241	-32.4167	1.42629	1116	-10.8284
LOC112445951	76	190.678	61	51.381	15	1.89183	201.478	-8.02537
LOC104971503	42	60.1366	74.1875	23.7083	-32.1875	1.34285	1100.5	-10.6847
LOC101907327	19.9588	15.4259	9.46755	45.9542	10.4912	-1.57484	93.0197	-5.30461
CD101	5.47917	1822.45	57.2417	567.6	-51.7625	1.68293	2782.26	-20.3753
CD2	35.4583	208.964	51.7917	430.085	-16.3333	-1.04137	299.613	-6.66789
BCL2L15	11.2969	63.1029	55.7813	346.045	-44.4844	-2.45518	2069.87	-21.8689
PTPN22	7.975	198.269	33.75	626.83	-25.775	-1.66062	716.67	-10.5517
LOC104971585	12.0139	15.5041	45.1997	4.54044	-33.1858	1.77174	1169.13	-11.4268
C3H1orf162	11.2009	4549.78	44.8646	1239.49	-33.6637	1.87605	1202.4	-11.7211
CD53	8.77083	3575.73	24.6875	1731.68	-15.9167	1.04606	286.004	-6.02578
PROK1	88.525	2.84353	65.5917	27.8061	22.9333	-3.28965	493.019	-10.2317
LOC615514	71.0157	2.81738	42.738	12.8125	28.2777	-2.18513	750.799	-9.33844
LOC112445985	56.7978	4.73267	39.4633	11.7112	17.3345	-1.30717	269.705	-5.91588
GBP4	45	849.536	73	228.351	-28	1.89542	842.439	-9.82311
LOC510382	3.33333	150.53	21.5	55.8176	-18.1667	1.43125	368.046	-6.80473
LOC507055	11.7083	270.676	36.75	119.183	-25.0417	1.18338	677.485	-8.23773
LOC511531	13.9375	311.136	35.25	136.196	-21.3125	1.19186	497.538	-7.26438
ADGRL2	48.3292	84.881	18.7	228.1	29.6292	-1.42616	823.968	-9.01738
LOC107132328	75.8	36.6896	43.225	4.77852	32.575	2.94074	1009.49	-17.2626
LOC112446007	11.3333	34.1773	47.0083	14.2394	-35.675	1.26315	1343.59	-12.0028
LDLRAD1	75.8	1.59817	50.575	10.1249	25.225	-2.66341	595.47	-9.32177
SLC5A9	39.2535	10.1504	23	109.415	16.2535	-3.43019	244.89	-9.61257
HPDL	32.6167	5.10593	20.799	19.945	11.8177	-1.96578	121.354	-5.9486
MPL	23.5	4.35043	59.5	16.7954	-36	-1.94883	1368.76	-15.6382
TIE1	17.4333	2.22819	39.6083	7.76448	-22.175	-1.80102	537.634	-9.62089
LOC510369	57.732	3.95043	20.5668	59.0739	37.1652	-3.90244	1325.44	-15.7618
C3H1orf210	57.732	17.5697	20.5668	238.132	37.1652	-3.7606	1324.39	-15.3696
LOC107132340	12.2846	513.786	37.6156	142.648	-25.331	1.84871	694.824	-8.99054
TMCO2	93.1667	10.8363	82.5	4.78302	10.6667	1.17988	96.118	-5.82982
RHBDL2	74.4375	9.04752	24.1667	40.0127	50.2708	-2.14486	2436.26	-18.5241
FHL3	8.625	855.519	53.75	373.998	-45.125	1.19377	2124.97	-16.441
RAB17	92.8625	4.05326	82.575	13.0741	10.2875	-1.68955	89.5157	-5.43064
LOC101905509	73.2422	2.32332	50.2493	8.48753	22.9929	-1.86916	488.73	-7.58624
IL3RA	15	78.2152	34.9152	19.2613	-19.9152	2.02174	440.177	-7.95999
LOC107132360	64.327	93.9292	50.8158	26.0535	13.5112	1.8501	161.699	-7.61368
FZD1	23.5596	21.1379	12.4173	68.4337	11.1423	-1.69487	106.221	-5.50751
PPP1R9A	71.6458	211.69	61.6	99.1797	10.0458	1.09383	84.2213	-5.61032
AGR2	65.125	4.0673	32.5938	93.7626	32.5312	-4.52687	1016.38	-16.2963
LOC112446475	89.375	9.29039	60.625	2.98181	28.75	1.63955	775.872	-11.5754
TRGC6	90.8351	25.3438	80.0417	307.311	10.7935	-3.59999	108.762	-9.73294
GPR141	61.3542	107.369	87.425	45.467	-26.0708	1.23969	732.202	-8.57682
AOAH	10.8073	303.362	47.6935	133.733	-36.8862	1.18168	1433.56	-12.4773
LOC112446387	44.7589	1.9301	32.5625	12.6851	12.1964	-2.71639	133.021	-7.4067
ADCYAP1R1	2.125	41.8352	13.125	93.6011	-11	-1.16181	143.901	-5.74747
HOXA5	74.038	6.11727	35.5152	13.5611	38.5228	-1.14851	1412.5	-12.2832
HOXA4	70.7732	2.5634	29.448	7.48365	41.3252	-1.54568	1631.88	-13.6329
MYO1G	11.1508	1544.65	50.401	679.259	-39.2502	1.18525	1618.06	-13.5302
GCK	75.1423	38.9254	51.4596	980.817	23.6827	-4.6552	536.973	-14.7913
LOC100848995	48.729	10.0408	31.4792	28.4041	17.2497	-1.50023	267.42	-6.06494
LOC107131296	76.2917	6.87806	56.0833	53.244	20.2083	-2.95254	378.646	-8.9186
LOC107132422	90.3964	2.82635	75.1107	9.60811	15.2857	-1.76531	208.05	-6.05892
GPR37	28.9966	2.51729	14.3713	6.49703	14.6253	-1.36791	188.428	-5.54571
KCP	45.8663	154.362	76.8866	49.7377	-31.0203	1.63391	1025.46	-10.5071
LOC514257	76.1042	45.4389	44.3167	16.7885	31.7875	1.43646	953.282	-12.3056
TBXAS1	7.875	130.942	32.1458	59.399	-24.2708	1.14041	637.891	-7.99191
LOC615948	60.75	4.71471	47.625	12.2875	13.125	-1.38195	149.687	-5.36598
LOC509513	72.0083	75.5725	82.5167	206.858	-10.5083	-1.45271	133.064	-6.07956
LOC101902797	84.5625	3.35184	41.25	10.5225	43.3125	-1.65046	1796.6	-14.6134
LOC786254	77.1667	2.09222	66.6667	7.13503	10.5	-1.76988	93.7824	-5.55433
LOC511617	58.2667	66.485	42.2833	157.832	15.9833	-1.24729	227.126	-5.64933
LOC104972290	44.4043	2.71654	26.0561	8.13448	18.3482	-1.58228	304.658	-6.33365
ASIC3	64.806	42.6704	29.2149	101.197	35.5911	-1.24587	1201.02	-11.0796
LOC107132456	13.9903	325.341	29.3366	101.48	-15.3462	1.68076	269	-6.62332
LOC104972351	25.3884	194.397	51.0223	48.0058	-25.6339	2.01772	711.542	-9.31236
LOC107132462	60.3839	12.0379	82.1297	4.49807	-21.7457	1.4202	517.682	-7.57168
LOC104972363	83.0911	157.354	71.8169	16.179	11.2742	3.28182	118.285	-11.3902
GLYCAM1	84.8313	3685	57.0071	152719	27.8241	-5.37307	749.378	-18.5809
GPR84	13.2292	1603.27	55.5833	387.857	-42.3542	2.04742	1880.31	-15.612
TNS2	78.7708	143.333	28.4053	631.308	50.3655	-2.13897	2445.58	-18.5721
NR4A1	16.475	330.501	41.5833	720.705	-25.1083	-1.12475	680.142	-9.31345
GPD1	60.5	45.3414	25.25	646.425	35.25	-3.83358	1189.89	-14.9146
AQP5	54.6235	1.98191	33.0743	7.11152	21.5492	-1.84327	427.086	-7.2394
LALBA	83.2083	3272.59	48.1875	108693	35.0208	-5.05369	1184.7	-19.0142
PTPRB	61.6875	44.4312	37	20.3634	24.6875	1.12559	564.952	-9.04683
TBC1D30	59.6458	51.9835	80.1042	165.746	-20.4583	-1.67284	460.768	-8.81659
CYP27B1	36.2861	280.79	19.2561	55.9521	17.03	2.32723	264.595	-9.6404
LRP1	20.1691	19964.2	31.741	7566.15	-11.5719	1.39978	159.261	-5.74221
MMP19	69.1042	13314.3	80.1417	5899.89	-11.0375	1.17422	145.514	-5.42803
SPIC	10.125	140.173	27.625	43.1415	-17.5	1.70006	343.919	-7.01188
MYBPC1	76.0625	10.0009	49.625	273.714	26.4375	-4.77447	670.883	-15.7671
IGF1	9.3125	215.045	23.4792	83.6327	-14.1667	1.3625	230.878	-6.04078
GLT8D2	77.4792	1.89825	40.1875	41.371	37.2917	-4.44588	1338.99	-17.4912
LOC616957	88.9028	3.82544	75.0883	9.42319	13.8145	-1.30059	166.753	-5.38015
CSF2RB	4.75	4349.55	21.4375	12822.9	-16.6875	-1.55978	313.179	-7.56423
IL2RB	25.75	408.313	53.375	1126.72	-27.625	-1.46438	818.43	-10.8344
CARD10	63.5556	10.275	31.5833	21.4782	31.9722	-1.06373	963.042	-9.67889
MANSC4	77.3376	8.22681	56.0297	288.573	21.3079	-5.13246	439.184	-16.4295
SLCO1A2	49.429	5.37267	20.6917	62.559	28.7373	-3.54151	783.5	-12.1994
LOC101905711	51.2545	38.9723	68.8632	5.35293	-17.6086	2.86405	353.594	-9.30254
MGP	82.8036	5.27903	46.375	26.1204	36.4286	-2.30683	1263.19	-12.2128
LOC100140174	55.875	1.39322	37.25	8.78512	18.625	-2.65664	318.604	-8.01818
LOC112446743	71.8542	2.34748	54.347	22.2757	17.5072	-3.24629	283.653	-9.25053
KLRC1	78.75	9.10297	67.5417	49.0952	11.2083	-2.43117	110.393	-6.72501
LOC101905165	67.5	2.59725	20.2778	10.3927	47.2222	-2.00052	2144.29	-16.7774
LOC100336869	84.7083	8.06114	73.625	68.1891	11.0833	-3.08049	111.233	-8.23159
LOC618565	77.0268	11.4967	34.0397	71.8423	42.9871	-2.64361	1773.11	-15.4091
CLEC12A	14.875	1358.05	50.75	563.214	-35.875	1.26979	1358.3	-12.0891
LOC509972	48.1875	1054.61	62.9375	443.179	-14.75	1.25075	248.533	-6.01134
A2M	87.3183	1230.41	76.3125	552.577	11.0058	1.15489	102.755	-5.84315
CLEC4A	17.625	652.214	62.3667	266.92	-44.7417	1.28894	2090.05	-16.2635
CLEC4D	27.625	337.529	73.25	123.202	-45.625	1.45399	2172.06	-16.7924
LOC112446758	67.7777	4.59762	31.6532	9.96316	36.1246	-1.11572	1237.99	-11.271
LPAR5	44.4792	117.027	7.41667	45.0133	37.0625	1.37842	1306.23	-14.5269
SCNN1A	74.8781	33.0201	39.675	138.065	35.2031	-2.06393	1176.75	-11.4668
GALNT8	69.1556	3.23055	44.4774	6.96697	24.6782	-1.10875	563.817	-7.41585
FGF23	60.1254	11.0446	41.3492	4.77458	18.7762	1.2099	319.513	-7.50866
LOC112446766	31.1129	1.59817	11.259	8.92119	19.8539	-2.48082	362.699	-7.87778
NINJ2	14.9224	12.7378	42.388	3.42208	-27.4656	1.89617	811.784	-9.66315
H1F0	24.8805	233.538	11.6533	1118.34	13.2271	-2.25963	155.122	-6.56945
LOC101905166	70.9824	12.0277	31.607	125.177	39.3754	-3.37954	1486.74	-15.2499
LOC101906018	34.783	2.79122	20.3331	6.81178	14.4499	-1.28713	183.469	-5.45391
MGAT3	25.85	10.7184	53.7607	21.6994	-27.9107	-1.01756	833.864	-10.1479
FAM83F	32.592	57.4698	15.5548	276.147	17.0372	-2.26456	263.19	-7.0432
LOC112446780	94.3866	61.1983	81.9569	11.4917	12.4297	2.4129	138.269	-8.82656
LOC101904078	76.5312	2.28049	42.6979	5.86758	33.8333	-1.36342	1082.61	-10.4417
LOC107132530	67.6188	23.182	57.4694	10.0417	10.1493	1.20701	86.4073	-5.79536
LOC101908206	72.7893	15.8544	27.9827	224.806	44.8066	-3.82573	1936.69	-18.6059
2023-03-01	9.28125	162.121	33.35	73.7325	-24.0687	1.1367	627.728	-7.93368
ARHGEF38	64.7445	17.8213	22.1241	68.9664	42.6204	-1.95229	1739.44	-14.4719
LOC112447043	73.6058	21.3261	86.396	9.63779	-12.7902	1.14585	190.542	-5.62042
SPP1	70.625	241040	26.75	117316	43.875	1.03888	1843.72	-17.262
LOC112447058	72.6667	3.11746	34.375	58.9179	38.2917	-4.24026	1410.94	-17.1705
RBPJ	66.7333	5441.5	78.1375	2717.03	-11.4042	1.00197	154.016	-5.3122
RHOH	90	449.545	61.2917	214.138	28.7083	1.06993	771.847	-10.3306
CNGA1	76.25	2.99617	42.875	7.44955	33.375	-1.31403	1052.56	-10.2529
LNX1	76.8861	45.5875	39.9796	119.521	36.9065	-1.39055	1294.21	-11.6536
STAP1	20.6964	131.738	52.7812	56.6956	-32.0848	1.21636	1093.35	-10.5698
HSTN	64.725	614.977	48	19390.8	16.725	-4.97869	272.108	-15.2839
CSN1S2	59.5	10617.7	46.25	414012	13.25	-5.28514	177.623	-16.5135
CSN3	65.625	6953.22	38.9583	297632	26.6667	-5.41971	689.004	-18.5684
LOC107132573	34.9375	11.7791	46.9271	5.54398	-11.9896	1.08723	169.03	-5.46009
PPBP	25.4643	44.1041	68.9643	15.7534	-43.5	1.48525	1978.72	-15.7085
CXCL11	67.0417	11.9412	25.0625	61.9184	41.9792	-2.37442	1688.12	-14.5974
LOC112447104	12.3437	105.982	46.0313	20.1927	-33.6875	2.39191	1206.4	-12.4598
PRKG2	32.4393	19.4442	18.5714	423.398	13.8679	-4.4446	185.269	-12.8746
LOC112447110	74.0625	17.5983	85.9375	3.54102	-11.875	2.3132	170.605	-7.3026
PLAC8	0.875	453.965	15.75	192.13	-14.875	1.24049	252.446	-6.02102
LOC112441472	77.0875	4.10315	37.7083	15.0669	39.3792	-1.87657	1479.57	-12.9649
C6H4orf50	82.6858	6.91561	68.794	17.3209	13.8919	-1.32459	168.805	-5.41032
CLNK	50.825	13.5034	62.7625	30.1989	-11.9375	-1.16118	167.19	-5.9121
LOC104968939	7.375	22.5199	36.9375	5.2761	-29.5625	2.09366	936.207	-10.5868
FGFBP1	61.75	53.7743	40.25	1421.09	21.5	-4.72394	443.136	-14.7268
SH3BP2	67.4556	4039.79	77.5569	1427.41	-10.1014	1.50089	124.911	-5.7179
LOC101906603	10.75	31.2402	51.375	10.8898	-40.625	1.52043	1731.5	-14.3321
LOC100848105	82.7595	72.3082	61.748	23.0191	21.0115	1.65133	405.581	-9.00283
LOC112447323	56.5288	92.8686	80.525	30.1989	-23.9962	1.62069	625.577	-8.35086
HSH2D	12.15	196.817	32.0451	68.3803	-19.8951	1.5252	437.434	-7.26435
LYL1	18.6675	166.49	71.3311	69.5171	-52.6636	1.25999	2876.7	-20.7943
MUC16	47.806	714.145	33.8444	5340.09	13.9616	-2.90258	176.821	-7.98981
ICAM4	28.012	34.8281	52.8195	12.1534	-24.8074	1.51889	666.366	-8.45842
RETN	11.625	114.916	33.9583	26.5507	-22.3333	2.11376	547.357	-8.63508
LOC112447353	12.5833	11.9187	41.8125	4.44682	-29.2292	1.42238	913.417	-9.70839
LOC100337044	16.375	32.6981	58	13.2585	-41.625	1.30229	1814.97	-14.6954
LOC100337081	19.3125	54.5045	69.625	18.7052	-50.3125	1.54294	2630.99	-19.4484
LOC518134	10.125	113.286	42.5	30.791	-32.375	1.87938	1114.85	-11.253
LOC508459	16.6875	4816.15	46.4125	1184.33	-29.725	2.02381	945.842	-10.5384
LOC112447357	18.4732	78.2502	46.8839	19.4615	-28.4107	2.00747	866.858	-10.1018
C3	9.6875	1520.37	23.3333	5649.08	-13.6458	-1.89359	216.173	-7.50006
SLC25A23	26.0239	22.2509	10.73	72.0774	15.2939	-1.69568	208.065	-5.97523
LOC112447362	89.1625	2.74219	71.7292	5.90573	17.4333	-1.10678	272.528	-5.803
STAP2	63.8222	23.698	30.1875	247.456	33.6347	-3.38433	1078.58	-13.2159
EBI3	4.3125	61.9739	15.5937	12.8209	-11.2812	2.27316	155.529	-7.16236
S1PR4	41.0195	113.531	61.5426	56.6398	-20.5231	1.00319	462.539	-6.94507
PEAK3	14.2981	86.1441	54.3343	40.0482	-40.0362	1.10502	1681.67	-13.8722
LOC112447383	76.925	1	62.8278	6.66502	14.0972	-2.73661	179.482	-7.6168
LOC107132618	76.5625	1.59817	51.4375	26.5945	25.125	-4.05664	599.58	-12.9073
HK3	24.6	2003.44	60.1611	566.229	-35.5611	1.82302	1337.15	-12.3954
NLRP3	5.15625	1194.11	17.7188	309.676	-12.5625	1.9471	187.049	-6.66825
THEG	83.7425	1.39322	73.3267	6.80917	10.4158	-2.28906	94.1372	-6.39502
ELANE	12.25	13.0414	44.4083	3.77933	-32.1583	1.7869	1100.09	-11.0688
LRRTM2	89.8504	3.5012	67.0101	7.69849	22.8403	-1.13672	480.04	-6.95836
HTR4	76.7833	3.55921	37.625	7.84312	39.1583	-1.13987	1460.64	-12.5616
CSF1R	32.5969	4805.94	74.5741	2123.82	-41.9772	1.17816	1844.74	-14.8261
MYOZ3	89.1042	10.0375	73.9917	3.59225	15.1125	1.48244	203.15	-7.1676
FAT2	65.875	21.4883	37.6562	129.45	28.2188	-2.59077	749.402	-9.95224
ITK	90.1875	328.626	72.75	1003.74	17.4375	-1.61087	273.887	-6.20628
LOC104969238	60.75	1.76029	45.75	7.28787	15	-2.04969	200.943	-6.41869
IL12B	67.125	51.8714	78	16.1652	-10.875	1.68205	143.243	-6.05457
LOC107132656	82.625	599.555	47.875	29.8498	34.75	4.3281	1162.27	-24.618
HAPLN1	28.1667	5.40694	17.5	22.0882	10.6667	-2.03039	97.9062	-5.95759
LOC100616526	25.6222	2.38133	9.09524	6.83307	16.527	-1.52077	244.441	-5.96777
IL33	81.6292	11.6327	70.5694	36.6655	11.0597	-1.65624	104.427	-5.45145
LOC112447796	35.75	28.4786	66.75	7.12183	-31	1.99956	1025.59	-10.9265
LOC104969334	18.625	112.281	68.3125	27.6169	-49.6875	2.02349	2569.16	-19.4115
LOC516849	76.75	16.3738	42.5	337.266	34.25	-4.36443	1126.49	-16.2362
CD72	11.0774	59.1853	54.4931	19.7615	-43.4158	1.58255	1971.56	-15.7231
LOC112447818	1.85577	11.4535	18.2886	3.85587	-16.4328	1.57065	305.211	-6.65242
LOC107132707	56.5972	10.5799	32.1938	4.25561	24.4035	1.31388	552.065	-9.31755
SPINK4	94.375	1	84.125	6.06526	10.25	-2.60057	92.458	-7.02208
SLC28A3	35.4361	145.193	61.4658	1287.36	-26.0296	-3.14838	737.064	-14.9385
FBP2	87.2374	2.65854	69.6574	18.7176	17.58	-2.81569	283.586	-8.20567
ECM2	79.3125	7.80489	36.1875	17.3804	43.125	-1.15501	1779.51	-14.4147
LOC107132718	9.875	55.2229	40.5	21.0737	-30.625	1.38982	999.522	-10.1572
LOC112447832	61.2557	270.47	82.4907	80.501	-21.235	1.74839	495.892	-7.836
PTPN3	50.6875	37.394	85.3958	83.3435	-34.7083	-1.15626	1272.74	-13.2217
LOC783399	78	3.9076	38.625	10.4757	39.375	-1.42269	1477.89	-12.7116
TNFSF15	75.6287	663.517	26.4886	206.247	49.1401	1.68576	2325.37	-22.0667
LOC104969458	21.5	25.5178	71.1417	11.7976	-49.6417	1.11302	2561.39	-18.9588
LOC101906836	23.7689	271.937	59.9521	134.927	-36.1832	1.01109	1380.43	-12.1216
SNTG2	71	13.0328	87.9444	3.6156	-16.9444	1.84984	324.3	-7.13285
LOC112447860	12.1063	51.2493	26.7449	3.73251	-14.6386	3.77931	258.508	-11.6915
LOC112448017	71.625	2.22819	39.625	17.3824	32	-2.96369	971.86	-11.7652
TSPYL4	28.5065	151.726	17.0326	723.937	11.4739	-2.2544	115.135	-6.40537
FRK	69.1871	27.7302	31.3856	64.3142	37.8015	-1.21368	1358.96	-11.9809
SCML4	5.0625	72.815	26.25	400.082	-21.1875	-2.45799	495.537	-10.9484
LOC104969545	2.1875	32.4586	16.375	12.7701	-14.1875	1.34583	231.458	-6.02526
ENPP3	67.8125	28.928	31.8542	214.965	35.9583	-2.89356	1232.93	-12.9599
LOC112448135	24.875	27.9996	55.9042	3.1264	-31.0292	3.16283	1033.8	-13.1714
LOC101906317	1.5	714.786	34.375	191.883	-32.875	1.89728	1148.5	-11.455
LOC104969596	3.3125	42.3276	16.5	7.15153	-13.1875	2.56528	207.305	-7.9987
IL22RA2	78.8458	95.9359	93.5625	28.0947	-14.7167	1.77177	249.215	-6.66212
LOC112448140	43.2944	10.702	66.3359	4.33219	-23.0415	1.30471	577.836	-7.78721
LOC112448069	70.3447	2.39231	40.1763	12.4385	30.1684	-2.37834	858.528	-10.1695
STX11	20.125	908.616	77.5	196.102	-57.375	2.21207	3407.7	-24.2836
ESR1	13.7188	52.1966	53.7902	666.986	-40.0714	-3.67563	1695.45	-24.0245
LOC112448082	72.9163	3.07791	33.42	85.0363	39.4963	-4.78806	1507.14	-19.463
LOC104969640	79.8639	2.88586	63.3472	6.90742	16.5167	-1.25915	243.47	-5.74335
CCDC112	39.9896	145.591	80.1473	67.1048	-40.1577	1.11743	1691.68	-13.9326
LOC112448549	76.375	10.5553	87.6621	1.43379	-11.2871	2.88006	158.979	-8.61668
LOC112448639	22.4688	13.6276	34.8929	6.13765	-12.4241	1.15077	180.627	-5.57591
F2RL2	11.0603	391.124	34.6342	178.916	-23.5739	1.12834	603.189	-7.79359
LTB4R	13.553	292.622	39.5844	117.354	-26.0314	1.31817	730.295	-8.62439
CIDEB	61.9466	4.06702	33.4408	18.3857	28.5058	-2.17654	763.285	-9.39218
REC8	78.0989	80.6488	61.8663	26.3943	16.2325	1.61143	236.559	-7.67715
CEBPE	26.0546	30.9387	59.3436	11.5385	-33.2891	1.42296	1174.97	-11.1533
LOC101908015	94	165.368	83.75	1502.68	10.25	-3.18378	95.6604	-8.47347
LOC407201	82.9	3.05176	55.9167	12.3598	26.9833	-2.01794	681.087	-8.76266
LOC107132832	77.8333	2.29147	56.25	6.06117	21.5833	-1.40332	427.195	-6.8245
LOC100298823	50.75	2.95662	20.625	6.61609	30.125	-1.16203	852.045	-9.06459
LOC100337168	45.2917	3.35754	67.0556	22.8221	-21.7639	-2.76495	522.906	-12.0557
LOC789029	62.25	1.65617	38.75	11.1413	23.5	-2.75	515.15	-9.10507
ARHGEF40	83.3583	411.758	65.6667	162.954	17.6917	1.33733	282.39	-7.47447
LOC104973100	87.4322	25.2714	75.4425	8.01077	11.9897	1.65749	125.068	-6.90714
RNASE6	3.875	2575.22	14	954.067	-10.125	1.43253	125.213	-5.62949
LOC101905672	84.4229	4.16443	44.8438	39.9164	39.5792	-3.26079	1501.69	-15.0685
CAPN3	64.6554	93.4799	77.3301	46.6692	-12.6747	1.00218	187.031	-5.47881
CDKL1	19.089	4.87611	8.94227	19.1811	10.1467	-1.97588	87.8725	-5.83336
LOC112448454	74.4	3.4432	49.175	14.2139	25.225	-2.04548	592.742	-8.33682
LOC104973153	75.1639	9.57843	37.9688	36.4018	37.1951	-1.92615	1316.67	-12.102
LOC112448482	36.925	9.54102	70.425	2.30566	-33.5	2.04896	1191.82	-11.8761
ATP8B4	94.5	568.017	81.125	243.607	13.375	1.22138	156.181	-6.35122
FERMT2	28.7374	53.6866	16.9677	299.1	11.7696	-2.47799	122.437	-6.86076
LOC112448507	74.4513	173.197	57.3072	54.6114	17.1441	1.66514	265.439	-8.00726
LOC101904397	80.0417	4.85943	39.6042	131.058	40.4375	-4.75327	1580.26	-19.6803
LOC112448513	69.8917	2.11838	48.4167	23.2877	21.475	-3.45854	432.126	-10.4187
CCDC196	74.1909	1.20495	53.3393	13.4049	20.8516	-3.47572	407.044	-10.3628
PAPLN	1.375	54.7821	12.375	111.132	-11	-1.02049	143.634	-5.57459
ESRRB	45.1667	4.09745	29.0208	23.9958	16.1458	-2.54998	236.602	-7.45121
LOC104973262	70.9626	1.39322	47.3607	12.4531	23.6019	-3.16002	522.06	-10.0399
DIO2	50.3956	41.3398	25.6378	1081.18	24.7578	-4.70893	587.487	-15.1895
LOC101905198	72.3766	3.68155	54.0937	36.4186	18.283	-3.30629	310.315	-9.51334
LOC112448534	85.7786	1.90395	69.9954	8.64893	15.7831	-2.18353	224.085	-6.73331
LOC112448536	91.0129	22.6589	76.5715	10.1416	14.4414	1.15979	183.649	-6.45396
ZAP70	73.067	360.778	40.1329	1062.89	32.9341	-1.55881	1024.79	-10.214
AFF3	10.0096	155.488	20.3903	603.998	-10.3807	-1.95774	131.729	-6.97457
LOC112448744	83.1506	129.014	65.8632	45.4434	17.2874	1.50539	269.546	-7.70525
LOC112448745	16.3036	11.5065	64.0828	1.22754	-47.7792	3.2286	2386.21	-20.232
LOC107132901	9.31875	90.8022	19.5179	9.40992	-10.1991	3.27047	136.044	-9.6789
LOC112448746	14.25	50.0309	60.625	7.53433	-46.375	2.73127	2248.21	-18.5558
IL1RL1	63.5	5.03823	34	2.46941	29.5	1.02875	816.321	-10.5492
IL18RAP	7.4375	217.677	40.9583	82.1396	-33.5208	1.40604	1190.85	-11.2299
ATP6V1B1	62.2419	3.48981	27.3938	13.7995	34.8481	-1.9834	1152.26	-11.2522
XDH	6.25	5171.67	19.2222	35778.7	-12.9722	-2.7904	200.897	-9.60302
NLRC4	13.2357	478.009	47.8833	139.501	-34.6476	1.77676	1271.09	-11.9872
LOC782437	52.1032	17.9779	84.9311	46.2978	-32.828	-1.36472	1142.63	-12.7776
SLC8A1	74.6042	116.648	36.2854	285.718	38.3188	-1.29243	1397.52	-12.217
EML4	75.0521	1474.21	38.8437	704.971	36.2083	1.06431	1244.42	-13.4294
LOC112448766	46.5553	124.099	60.1577	42.984	-13.6024	1.52962	214.666	-6.16324
LOC112448940	33.6	16.3711	79	33.4799	-45.4	-1.03215	2149.37	-18.5882
LOC112448782	6.70833	76.8818	32.8333	12.1638	-26.125	2.66005	741.089	-10.6043
IL1RN	75	29361.6	43.125	8423.5	31.875	1.80144	959.974	-13.2527
LOC112448791	9.5	121.785	44.125	17.5694	-34.625	2.7932	1274.43	-13.5451
LOC107132935	9.5	161.338	36.125	21.9772	-26.625	2.876	769.675	-11.2152
LOC101904757	85.7181	3.00565	70.851	7.73461	14.8671	-1.36365	195.086	-5.57563
PLEK	9.525	6606.87	47.9286	1617.27	-38.4036	2.0304	1553.67	-13.8052
CAPN14	75.5	32.675	43.625	227.056	31.875	-2.79679	963.202	-11.4005
LOC101905151	50.7907	26.5128	39.0809	215.707	11.7098	-3.02431	123.992	-8.12033
KRTCAP3	70.1196	14.4517	23.2699	121.453	46.8496	-3.07109	2115.07	-17.9213
LOC104973427	82.6924	4.76452	60.7764	44.555	21.916	-3.22518	448.929	-9.87668
IFITM5	26.0477	9.64672	8.75489	2.38646	17.2928	2.01517	271.667	-8.86955
LOC112448825	70.25	4.29862	51.6875	13.8504	18.5625	-1.68798	312.475	-6.48245
LOC101904759	61.75	6.03276	25.875	17.5462	35.875	-1.54027	1221.5	-11.3062
LOC101905845	77.9241	6.30027	43.7759	14.429	34.1482	-1.19548	1103.03	-10.5067
LCN2	5.09066	26.3745	19.0357	271.895	-13.9451	-3.36583	232.31	-11.7121
LOC104973485	48.6339	3.70615	67.1517	7.81531	-18.5178	-1.07638	379.969	-7.25423
LOC112448841	88.0747	10.3885	77.2026	5.18283	10.8721	1.00317	99.7134	-5.60228
LOC112448848	18.1142	16.4369	38.0637	3.50069	-19.9495	2.23123	442.565	-8.33156
LOC100848610	79.9783	1.84594	50.4539	17.242	29.5244	-3.2235	825.8	-11.6089
PAEP	74.1417	11621.5	43.725	544900	30.4167	-5.55113	897.323	-19.9536
ABO	73.125	57.8098	30.5417	154.434	42.5833	-1.4176	1734.71	-14.1812
LOC104973526	27.744	75.732	46.381	19.9959	-18.6369	1.9212	388.035	-7.54826
PTGDS	67.6242	11.3307	47.1237	47.2519	20.5006	-2.06014	385.774	-7.30936
TMEM210	74.0616	3.47505	32.8937	14.7137	41.1679	-2.08205	1620.99	-13.9218
LOC104973517	77.7779	54.2916	46.6616	127.986	31.1162	-1.23718	911.019	-9.42301
CYSRT1	83.7689	5.31986	36.7143	11.5346	47.0547	-1.11651	2126.32	-16.4447
LOC107132971	78.2951	19.3263	36.2583	74.1285	42.0368	-1.93946	1691.11	-14.1922
OLFM4	35.5144	125.346	53.3611	24.4354	-17.8467	2.35887	359.702	-8.19235
LOC101903713	91.375	8.56267	76.8056	4.23441	14.5694	1.0159	186.763	-6.2561
ARL11	3.375	430.811	21.25	167.458	-17.875	1.36325	356.768	-6.67547
CCDC169	90.7745	5.50991	80.3829	2.5267	10.3916	1.12478	90.706	-5.70539
ALOX5AP	9.75	157.013	41.9313	72.9046	-32.1813	1.1068	1099.44	-10.552
LOC112449053	80.1667	20.1988	49.3057	48.4569	30.861	-1.26243	895.741	-9.34524
LOC107132980	54.9743	6.84293	26.072	91.2108	28.9023	-3.73652	794.06	-12.7831
LOC112449059	62.294	3.18024	24.6911	10.1716	37.603	-1.67734	1345.57	-12.0802
LOC104973586	31.1136	2.91821	49.0238	7.55607	-17.9102	-1.37255	357.317	-7.54913
ACOD1	63.2917	4707.19	39.6083	1379.03	23.6833	1.77122	520.353	-10.1045
LOC107131218	94.3802	3.2106	83.8	9.86514	10.5802	-1.6195	94.8548	-5.36556
LOC112449074	70.1238	4.1176	26.6733	16.0936	43.4505	-1.96661	1809.36	-14.8736
LOC101905776	14.3496	17.3152	38.3883	5.26556	-24.0387	1.71738	628.053	-8.477
LOC112449100	30.6607	284.572	53.3589	67.5497	-22.6981	2.07477	564.305	-8.65575
SPTLC3	17.5351	50.5421	7.00882	897.388	10.5263	-4.15017	107.678	-11.6237
LOC107133025	72.6458	1.6913	42.6875	18.8197	29.9583	-3.47604	852.402	-12.3513
LOC513969	93.4444	5.03345	82.6425	26.6819	10.8019	-2.40624	102.109	-6.64753
LOC112449372	67.6667	1.49405	26.875	7.30925	40.7917	-2.29049	1591.73	-13.9742
GATA3	32.2412	171.108	59.0625	1038.17	-26.8213	-2.60106	777.429	-13.4165
IL2RA	52.3175	354.228	65.5056	172.14	-13.1882	1.04109	201.379	-5.58327
LOC104973739	60.7773	7.67284	41.7529	16.5571	19.0244	-1.10962	327.51	-6.10351
GPR158	9.37341	2.85451	38.1859	10.1014	-28.8125	-1.82325	888.784	-12.086
CST7	10.9258	68.5663	47.4782	166.734	-36.5524	-1.28198	1407.93	-14.3392
AKR1C4	70.75	44.2265	44.875	164.571	25.875	-1.89573	624.172	-8.32286
LOC104973799	60.1042	17.1146	27.0938	7.39218	33.0104	1.21115	1029.53	-12.3201
LOC112449301	17.2692	68.7853	68.2298	19.0066	-50.9605	1.8556	2699.01	-20.0077
SLC23A2	58.125	2787.67	33.5	1288.11	24.625	1.1138	561.959	-9.00527
LOC101902869	35.875	14.0621	47.1667	6.0439	-11.2917	1.21826	151.792	-5.50294
LOC104973826	14.5	437.621	56.6875	171.155	-42.1875	1.35438	1863.34	-14.9919
LOC536097	9.5	479.987	49.75	164.048	-40.25	1.54888	1700.55	-14.1764
LOC100847256	55.856	20.204	69.7921	6.30331	-13.9361	1.68046	225.02	-6.41651
RBBP8NL	71.6389	8.76684	37.3646	41.4622	34.2743	-2.24167	1114.71	-11.3352
LOC104973848	80.4333	34.6538	60.6458	13.2442	19.7875	1.38765	357.098	-8.10373
SLA2	18.1775	191.362	61.3318	682.477	-43.1543	-1.83447	1948.29	-19.1765
LBP	71.3171	21.2835	30.2625	146.63	41.0546	-2.78437	1615.11	-14.7761
LOC404103	28.2113	75.999	41.6393	178.696	-13.428	-1.23346	207.989	-6.29751
MMP9	10.4	769.395	23.45	383.018	-13.05	1.00631	197.41	-5.53504
OCSTAMP	15.825	746.264	52.0208	131.518	-36.1958	2.50443	1387.05	-13.5936
LOC107133088	5.46875	372.831	32.5313	121.824	-27.0625	1.61372	787.96	-9.20489
LOC100847835	81.9917	38.1787	38.5	6.85839	43.4917	2.47682	1816.43	-21.2411
LOC112449349	40.9588	105.35	67.2848	45.9291	-26.326	1.1977	745.942	-8.62404
LOC101907931	73.2077	3.92058	44.1373	18.0631	29.0703	-2.20391	794.825	-9.59315
LOC112449354	62.6194	2.45929	33.1786	15.5921	29.4408	-2.6645	817.902	-10.4263
SCX	43.4009	21.6394	31.9107	128.875	11.4902	-2.57424	116.927	-7.04188
MROH6	53.4806	17.362	34.0833	45.1561	19.3973	-1.37899	341.714	-6.34983
ARC	31.9522	102.179	21.6464	946.47	10.3058	-3.21146	96.8697	-8.55293
LOC104973986	4.76923	21.5202	17.2772	7.33277	-12.508	1.55326	184.085	-6.05202
LOC112449616	28.5479	17.3721	44.3377	8.44034	-15.7897	1.0414	281.727	-5.99977
LOC107133109	74.375	47.9653	21.5	11.3853	52.875	2.07482	2700.84	-25.7878
LOC107133110	53.298	103.613	73.7439	35.7372	-20.4459	1.5357	460.737	-7.39623
LOC112449619	54.125	11.3766	11.875	5.65921	42.25	1.0074	1706.79	-16.3107
KLHL38	85.3939	4.00801	67.3542	8.35551	18.0398	-1.05984	292.796	-5.88932
FAM83A	70.7891	2.70706	50.5722	9.81652	20.2168	-1.85848	374.031	-6.98806
SDCBP	37.75	7443.5	61.375	3697.93	-23.625	1.00927	605.408	-7.73521
LOC104974028	51.3448	9.89683	34.3291	27.177	17.0157	-1.45735	259.733	-5.98656
CPQ	60.3788	4.21866	38.7737	10.4138	21.6051	-1.30364	427.853	-6.76032
SLC26A7	54.875	2.51159	84.625	8.25555	-29.75	-1.71676	945.13	-12.2205
LOC112449547	66.9563	11.737	45.9707	53.1351	20.9855	-2.1786	405.436	-7.57768
LOC100196897	21.8333	3.41504	48.0417	8.34472	-26.2083	-1.28896	739.035	-9.97765
COL14A1	20.5645	90.2018	61.9033	207.647	-41.3388	-1.20291	1789.7	-16.6392
MAML2	39.5798	2118.97	19.5677	632.761	20.0122	1.74363	366.831	-8.93123
LOC112441603	16.125	91.2019	72.1667	20.0504	-56.0417	2.18543	3253.81	-23.3949
LOC112441604	7.25	137.722	26.125	19.8971	-18.875	2.79113	401.775	-9.32794
AMOTL1	73.6667	67.3424	61.0188	299.77	12.6479	-2.15427	140.804	-6.32955
FUT4	41.5633	145.516	53.7879	67.5227	-12.2247	1.10773	175.221	-5.50926
ZC3H12C	63.25	3910.91	81.375	1254.67	-18.125	1.6402	367.158	-7.04747
CRYAB	73.3704	265.918	37.5546	776.772	35.8159	-1.54651	1217.39	-11.2863
C15H11orf34	78.8899	11.7389	54.6295	4.25564	24.2604	1.46385	545.836	-9.58399
NXPE4	55.5	20.9623	26.25	225.387	29.25	-3.42654	811.485	-12.0326
NXPE2	82.2292	4.66419	70.1417	50.0269	12.0875	-3.42301	134.714	-9.2496
LOC112441613	82.7857	24.0259	38.1056	10.3477	44.6801	1.21528	1913.92	-18.1207
CD3E	90.7083	579.003	73.2167	1685.07	17.4917	-1.54116	275.477	-6.14475
CD3G	74.625	152.048	50.5625	429.24	24.0625	-1.49726	535.879	-7.48031
TTC36	86.9667	1.66715	59.8333	13.4206	27.1333	-3.00899	693.61	-10.4934
C1QTNF5	49.4833	10.2122	32.9167	27.047	16.5667	-1.40517	245.375	-5.86737
LOC107133160	86.8125	6.31274	70.1667	14.3501	16.6458	-1.18473	247.347	-5.71376
CRTAM	20.0208	39.0009	41.8125	560.979	-21.7917	-3.84637	531.001	-16.0385
RASSF10	28.7773	7.98126	16.3078	42.9413	12.4695	-2.42768	137.835	-6.81611
LOC112441493	25.1402	54.6834	9.22159	154.086	15.9186	-1.49456	225.79	-5.8487
OR51E1	28.0833	2.17966	10.3899	5.92267	17.6935	-1.44215	281.926	-6.08753
LOC512627	57.1696	84.3647	39.75	21.8223	17.4196	1.95084	275.555	-8.74053
LOC104974280	54.4515	2.32332	31.3046	5.98446	23.1469	-1.36503	494.062	-7.15998
ELF5	68.8416	512.846	24.9382	14921.3	43.9034	-4.86271	1866.99	-21.4302
EHF	76.9167	518.188	35.7917	6403.69	41.125	-3.62736	1625.92	-16.5343
LOC112441652	71.1183	4.04556	33.7537	16.9189	37.3646	-2.06422	1329.49	-12.3004
SPI1	15.0506	3538.13	63.9113	1620.06	-48.8607	1.12694	2483.01	-18.5038
LOC112441555	71.475	2.09222	34.225	6.18662	37.25	-1.56412	1319.49	-11.8705
TCN1	54.3125	671.269	71.4375	85.7123	-17.125	2.96932	336.519	-9.50217
MS4A3	13.3333	1.65617	69.425	6.03514	-56.0917	-1.86554	3257.03	-27.8013
MS4A7	86.7083	31.6759	73.433	14.9959	13.2753	1.07882	153.345	-6.10747
LOC613282	53.575	1.20495	18.9583	10.9497	34.6167	-3.18386	1142.48	-13.079
PRELP	68.325	2.51309	28.0722	23.7472	40.2528	-3.24022	1554.05	-15.2951
RHEX	12.3944	71.618	41.6382	28.6717	-29.2438	1.3207	913.989	-9.63504
LOC104974370	26.1085	213.783	39.8214	100.572	-13.7129	1.08792	216.61	-5.7
PIGR	75.9375	241.43	30.7708	5825.89	45.1667	-4.5928	1974.63	-21.026
FCAMR	70.7259	6.60783	53.8571	80.0958	16.8687	-3.59948	265.236	-10.1793
C4BPA	76.0625	3.039	50.9375	18.1583	25.125	-2.57896	590.208	-9.14118
LOC515150	75.4063	28.2107	64.0188	12.704	11.3875	1.15095	110.566	-5.89696
CD55	95.625	3991.2	77.5	1237.94	18.125	1.68888	298.252	-8.3031
HHIPL2	80.5082	42.1989	43.5907	786.375	36.9176	-4.21994	1310.05	-16.6268
LOC112441819	81.8114	5.33904	46.4924	32.9398	35.319	-2.62518	1187.17	-12.2618
LOC112441824	34.7928	2.09222	18.1508	7.60491	16.642	-1.86189	249.092	-6.37703
XCL2	83.5134	9.76856	68.8214	199.998	14.692	-4.3557	206.478	-12.5788
SELL	17.25	2890.28	68.9375	930.665	-51.6875	1.63487	2774.18	-20.3059
TNFSF18	28.0208	169.234	16.1889	75.9678	11.8319	1.15556	120.051	-5.97598
TNFSF4	42	22.0427	60.875	10.754	-18.875	1.03542	394.542	-6.59653
LOC112441835	59.3825	207.652	88.9724	42.5547	-29.5898	2.28678	938.777	-10.8986
LOC112441841	81.0326	2.32332	68.6742	9.87818	12.3584	-2.08806	133.855	-6.19183
TTLL10	77.3681	4.70651	51.7909	16.213	25.5772	-1.78442	609.041	-8.12543
NCF2	4.91622	1730.32	17.8265	729.269	-12.9103	1.24651	194.128	-5.73674
LOC107133260	88.125	3.51966	54.375	34.9599	33.75	-3.31219	1085.67	-13.0821
LOC101904548	71.7708	16.6596	91.8125	5.36562	-20.0417	1.63454	443.943	-7.42686
LOC104974508	13.4167	8.88833	45.9375	3.60694	-32.5208	1.30114	1122.58	-10.7817
LOC101904614	43.8429	1	63.4902	23.4495	-19.6473	-4.55148	443.769	-18.4547
HSD11B1	69	67.7341	41.25	13.1269	27.75	2.36736	724.408	-13.2182
LOC112441869	26.8889	93.7774	60.6095	28.8321	-33.7206	1.70156	1205.66	-11.5552
CAMK1G	59.9015	65.621	25.7658	25.8068	34.1357	1.34641	1103.33	-13.1054
LOC112441876	79.125	9.86198	23.375	3.88145	55.75	1.34528	3004.95	-25.51
ELF3	51.3304	77.8964	17.2695	179.826	34.0609	-1.20698	1097.26	-10.4763
FGG	81.2758	11.4245	63.2315	220.978	18.0443	-4.27371	309.15	-12.5647
LOC100297399	70.3438	2.11838	27.9583	20.738	42.3854	-3.29125	1726.54	-16.2938
PABPC4L	51.3777	3.4489	36.4751	8.22809	14.9025	-1.25442	195.82	-5.49206
FZD10	25.7257	4.65849	39.5599	31.9918	-13.8341	-2.77977	225.587	-9.77801
SDS	67.75	10521.6	50.5417	3866.17	17.2083	1.44438	266.772	-7.56449
CFAP73	75.9274	1.4099	27.2045	7.56028	48.7228	-2.42285	2287.15	-17.9456
CMKLR1	39.3959	1064.44	51.9171	306.827	-12.5212	1.79459	185.32	-6.40917
PLA2G3	29.5181	2.1032	11.4299	9.52277	18.0882	-2.1788	297.748	-7.06239
SLC5A1	80.9535	19.012	40.8279	148.495	40.1257	-2.96543	1542.45	-14.7016
GGT5	30.7067	484.396	45.131	152.786	-14.4243	1.66467	239.738	-6.46271
GGT1	28.8167	29.3169	9.38542	465.778	19.4313	-3.98984	356.22	-11.7364
BCR	50.3094	70.7907	30.2027	222.735	20.1067	-1.6537	369.141	-6.73607
LOC112442079	50.7033	35.4377	78.2173	14.7476	-27.5141	1.26481	812.358	-9.03531
SLC7A4	17.8194	43.0658	6.26032	643.745	11.5591	-3.90188	126.594	-10.7625
LOC100295712	77.2083	3.20732	60.5417	6.53941	16.6667	-1.02779	247.7	-5.62817
IL34	55.1875	6.27662	20.25	16.7765	34.9375	-1.41839	1156.57	-10.8828
ATP2C2	34.1309	74.2629	16.9591	964.381	17.1718	-3.69889	275.671	-10.5186
LOC112442262	67.0161	44.8689	53.409	19.8173	13.6072	1.17895	161.889	-6.32501
LOC100848507	39.1537	20.1208	14.3518	62.1782	24.8019	-1.62772	570.97	-7.77552
CBFA2T3	10.5446	107.943	41.6496	52.2579	-31.105	1.04654	1029.13	-10.1297
SLC22A31	46.1849	2.9733	17.716	24.4169	28.4689	-3.03775	765.491	-10.9017
ABCC11	70.25	6.80927	32.8125	27.6345	37.4375	-2.0209	1334.64	-12.2866
CAPNS2	61.4338	8.84002	75.2878	3.27311	-13.8539	1.43339	221.738	-6.07781
ADGRG1	72.7927	169.547	32.9	398.539	39.8927	-1.23303	1517.49	-12.8981
CDH16	84.2437	5.75221	53.3125	65.3832	30.9312	-3.50673	909.993	-12.7027
RRAD	25.4486	20.5718	13.7523	534.495	11.6963	-4.69943	136.149	-13.8352
ELMO3	59.8547	58.1227	34.7112	154.485	25.1435	-1.4103	586.782	-7.69613
LOC107133343	74.739	6.94896	35.2079	15.6834	39.5311	-1.17437	1489.33	-12.7298
HPN	68.3096	14.0476	26.7735	184.369	41.5361	-3.7142	1659.73	-16.9197
FFAR2	18.4923	200.621	41.651	39.1018	-23.1587	2.35917	587.647	-9.26371
TYROBP	16.6786	2041.36	51.7732	900.158	-35.0946	1.18128	1301.19	-11.7255
SYNE4	75.375	2.80968	31.0083	15.9131	44.3667	-2.50174	1890.3	-15.8553
LGALS7	68.8611	3.35932	24.7938	7.08168	44.0674	-1.07592	1859.72	-14.89
RINL	10.5316	54.132	43.4333	119.488	-32.9017	-1.14231	1147.12	-12.3844
GMFG	16	748.645	53.75	363.837	-37.75	1.04099	1499.32	-12.8107
LOC100848419	17.9167	244.547	67.7917	103.928	-49.875	1.23452	2585.38	-19.1052
CNFN	81.2083	2.85401	50.9777	28.7549	30.2307	-3.33275	867.34	-12.0666
LOC100336941	39.0625	798.576	20.4	256.589	18.6625	1.63797	316.817	-8.32868
LOC112442325	44.682	13.6535	65.0361	6.64145	-20.3541	1.0397	455.395	-6.92889
CXCL17	72.9583	2.93794	42.3786	13.7101	30.5798	-2.22236	882.062	-10.0751
CD177	63.4033	13.4671	76.8192	5.97174	-13.4159	1.17321	208.202	-5.73415
CEACAM19	75.8871	9.61656	34.1208	63.2229	41.7663	-2.71685	1672.34	-14.9756
PTGIR	55.7633	75.651	36.5061	35.4006	19.2572	1.09558	336.591	-7.43311
C5AR1	8.125	4330.22	38.5	1649.81	-30.375	1.39214	983.803	-10.0722
C5AR2	50.1458	1098.89	27.4792	534.029	22.6667	1.04106	472.9	-8.27573
LOC112442349	11.4583	76.2105	28	14.5878	-16.5417	2.38523	312.469	-8.03651
SLC6A16	79.2264	3.38611	49.6042	9.21252	29.6223	-1.44397	823.619	-9.02548
LOC100138951	10.7524	134.631	48.792	34.2458	-38.0396	1.97501	1524.91	-13.5848
SIGLEC10	81.75	91.3256	66.5	43.0625	15.25	1.08459	205.924	-6.4965
LOC618268	88.5625	116.428	71.3958	44.4778	17.1667	1.38828	265.244	-7.44588
LOC107131224	7.5	149.734	23.825	68.1828	-16.325	1.13493	300.167	-6.17067
LOC112442215	7.02381	215.853	28.625	32.3709	-21.6012	2.73728	517.003	-9.71459
LOC789748	0	32.3912	39.5	4.43225	-39.5	2.86949	1645.53	-15.6133
LOC614923	26.9667	17.374	40.4375	5.82061	-13.4708	1.57768	211.017	-6.20926
LOC504861	62.8542	337.771	34.1054	143.352	28.7488	1.23648	774.528	-10.6718
NLRP12	9.38348	167.532	31.2599	69.2573	-21.8765	1.2744	523.198	-7.46846
LOC506868	60.4317	15.786	50.0632	7.64527	10.3684	1.04601	90.0756	-5.58808
MGC157082	7.04167	199.583	39.6667	72.656	-32.625	1.45784	1130.05	-10.9296
LOC104968422	14.5625	713.036	46.5833	202.715	-32.0208	1.81452	1091.11	-11.0508
LOC513941	93	18.1083	57.5	3.54753	35.5	2.35176	1199.75	-16.5453
SSC5D	57.209	18.2803	34.5287	37.3568	22.6803	-1.03108	472.863	-6.87732
LOC112442382	84.125	6.72848	61.625	14.7585	22.5	-1.1332	465.252	-6.87457
TMEM150B	15.8148	154.954	53.4772	54.3049	-37.6624	1.51269	1493.89	-12.994
NLRP2	71.1167	19.4061	60.25	4.3704	10.8667	2.15067	103.562	-7.83258
LOC100336589	28.5833	761.097	48.75	206.423	-20.1667	1.88247	450.152	-7.79367
LOC112442414	23.9063	1077.35	37.0541	327.599	-13.1478	1.71749	202.305	-6.36663
KIR2DL5A	78.625	9.41881	39.5	124.303	39.125	-3.72218	1469.9	-15.9882
KIR3DL2	72	3.50298	56.5	20.3237	15.5	-2.53651	217.33	-7.34425
KIR2DS1	68.4033	25.0505	45.4339	122.779	22.9694	-2.29315	489.337	-8.16537
LOC619159	58.7703	316.471	84.2815	85.4308	-25.5112	1.88925	704.491	-9.09469
LOC101907857	16.5692	64.4862	38.816	27.7841	-22.2468	1.21473	540.078	-7.5114
LOC407171	4.675	2369.49	36.8639	628.461	-32.1889	1.91468	1102.62	-11.2294
LOC510520	47.5472	820.378	78.9556	268.043	-31.4083	1.61382	1050.35	-10.6236
LOC112441494	29.6917	820.514	43.0417	381.225	-13.35	1.10588	206.141	-5.66244
LOC112442224	64.7722	14.3057	81.2	4.34907	-16.4278	1.71781	305.563	-6.8501
TARM1	25.9969	184.188	38.7479	51.0266	-12.751	1.85186	191.791	-6.52903
ZIM2	75.6667	1.9301	64.3542	7.31783	11.3125	-1.92274	110.476	-5.83966
LOC101904698	21.3565	4.04884	55.8704	17.1826	-34.5139	-2.08537	1261.65	-15.2852
LOC112442599	72.4554	1.4099	51.8839	15.6746	20.5714	-3.47477	395.964	-10.3151
RNF43	27.8125	25.3127	13.2	74.1269	14.6125	-1.55014	188.555	-5.71999
MGC137055	40.2949	4.99612	20.5699	12.8233	19.725	-1.35989	353.863	-6.40021
LOC112442606	39.8333	1.16212	20.5625	8.49165	19.2708	-2.86929	342.96	-8.5765
LOC100296618	63.05	2.21921	29.5417	7.95367	33.5083	-1.84157	1062.73	-10.632
CCL3	14.125	2107.92	54.8446	543.305	-40.7196	1.95599	1741.01	-14.748
LOC508666	25.3144	3745.52	72.3091	1458.96	-46.9947	1.36022	2301.24	-17.4957
CCL16	31.1715	91.201	49.1466	44.5206	-17.9751	1.03458	359.663	-6.40851
CCL2	44.8488	15533.3	25.0187	3783.93	19.8301	2.03741	361.119	-9.60676
LOC112442613	83.8972	66.4473	55.198	25.4278	28.6993	1.3858	772.212	-10.969
EVI2B	8.0625	4736.57	55.7083	2008.95	-47.6458	1.2374	2363.75	-17.8254
NOS2	70.8616	5433.44	40.5134	1122.22	30.3482	2.27551	869.954	-13.9796
SLC13A2	72.0938	2.47446	29.9955	11.943	42.0982	-2.27098	1697.45	-14.5315
TRPV1	76.9167	146.974	40.7083	67.2469	36.2083	1.12802	1244.57	-13.5621
ITGAE	57.9942	101.889	76.1492	342.246	-18.155	-1.74803	367.674	-8.31186
SCIMP	20.025	600.044	57.3208	212.712	-37.2958	1.49617	1465.66	-12.8248
TM4SF5	37.8917	6.44571	57.2967	30.1179	-19.405	-2.22421	418.76	-9.76287
ALOX12E	69.325	13.6976	29.8375	35.7112	39.4875	-1.38245	1486.45	-12.7487
CLDN7	70.2446	157.08	24.9268	407.322	45.3177	-1.37467	1969.75	-15.5277
TMEM95	68.625	5.44684	46.875	12.8829	21.75	-1.24196	433.721	-6.75542
TMEM102	63.2053	7.3394	34.2127	41.5879	28.9926	-2.50243	791.776	-10.0185
LOC112442823	62.1875	34.3964	29.4375	105.816	32.75	-1.62122	1013.23	-10.1895
LOC112442805	92.25	13.1352	81	4.86823	11.25	1.43197	108.524	-6.3449
CD68	1.25	15254.6	21.25	7610.56	-20	1.00316	440.345	-6.82396
SLC25A35	45.5657	27.8872	25.1395	94.5281	20.4262	-1.76114	381.816	-6.91487
LOC112442638	64.5193	3.19342	33.2973	10.55	31.222	-1.72407	918.707	-9.74397
CDRT1	65.4295	2.49442	49.9545	8.83393	15.475	-1.82435	213.708	-6.16029
LOC112442757	62.5219	133.623	46.7442	34.4124	15.7777	1.95717	224.203	-8.35834
GRB7	60.875	59.9086	28.625	125.837	32.25	-1.07072	980.365	-9.77959
GSDMB	54.2724	31.9223	39.6528	77.7343	14.6196	-1.28399	188.074	-5.4749
RAPGEFL1	5.60441	23.2189	18.7894	67.7714	-13.185	-1.54538	201.836	-6.73885
TNS4	79.1562	78.0236	42.4643	36.3163	36.692	1.10329	1278.85	-13.7347
KRT15	66.5917	58.2946	32.1182	201.962	34.4735	-1.79265	1126.34	-10.9412
LOC112442858	49.0928	3.44867	23.1458	7.18809	25.947	-1.05957	625.539	-7.74837
LOC112442847	21.301	7815.72	10.3757	2444.8	10.9253	1.67666	102.774	-6.76287
LOC112442677	10.0417	287.913	22.4417	121.242	-12.4	1.24775	180.243	-5.67037
LOC107131534	79.0823	8.75217	58.4529	42.3898	20.6294	-2.276	391.699	-7.66264
LOC112442683	69.4659	1.62432	31.3409	15.4962	38.125	-3.25401	1391.42	-14.4898
CD79B	20.0563	16.9682	50.0234	7.55181	-29.967	1.16794	957.768	-9.784
ZNF750	73.5417	50.0208	35.9583	181.952	37.5833	-1.86296	1344.74	-12.2051
LOC112442688	82.7523	4.61808	63.0999	16.5511	19.6524	-1.84156	352.544	-6.85966
CD7	30.3575	22.3366	42.1129	161.152	-11.7554	-2.85094	168.813	-9.5056
SLC16A3	16.0375	1134.62	48.85	300.667	-32.8125	1.91597	1144.35	-11.4549
LOC512869	57.35	8.05814	28.4583	18.4216	28.8917	-1.19288	781.671	-8.67488
LOC112442701	11.522	137.149	36.3384	35.6832	-24.8165	1.94243	668.422	-8.98235
LOC112442705	16.6979	42.4893	57.2	18.0427	-40.5021	1.23569	1720.42	-14.1317
SMIM5	81.0417	3.0333	69.4375	14.231	11.6042	-2.23007	117.791	-6.37146
CASKIN2	81.2375	38.12	52.0313	103.728	29.2063	-1.44418	799.937	-8.89392
CD300LF	13.6964	218.168	57.6174	51.6954	-43.921	2.07733	2018.61	-16.4061
CD300A	10.5493	170.571	57.4248	55.0759	-46.8755	1.63088	2290.71	-17.5558
LOC112442733	73.9518	14.7825	34.6586	31.6324	39.2932	-1.09751	1470.89	-12.6202
KCNJ16	53.2991	60.1581	65.5268	23.6254	-12.2277	1.34842	175.962	-5.75987
LOC112442735	50.8307	31.0369	67.5339	11.3959	-16.7031	1.44547	314.27	-6.54787
LOC112442738	60.0225	3.47683	45.7365	12.1492	14.286	-1.80502	180.522	-5.98054
LOC107131549	62.5938	7.83582	41.375	28.6402	21.2188	-1.86989	413.676	-7.20236
LOC112442742	77.913	2.17018	42.6826	25.6776	35.2304	-3.56462	1186.63	-14.1871
FOXI1	35.6327	2.61571	19.1233	14.4671	16.5094	-2.4675	247.393	-7.33689
LOC112442975	10.1125	19.1659	46.3129	9.01028	-36.2004	1.0889	1381.89	-12.1509
FAM169A	40.771	7.64077	21.0125	15.6601	19.7585	-1.0353	354.443	-6.21775
NAIP	6.25	10155.3	18.6667	1734.37	-12.4167	2.54976	186.015	-7.88329
GAPT	11.0625	429.054	35.6667	134.595	-24.6042	1.67254	656.471	-8.57233
GZMK	91.375	88.1317	77.75	43.5706	13.625	1.01631	161.936	-6.07829
CCL28	67.7833	8.99552	24.6375	88.134	43.1458	-3.29242	1790.14	-16.627
CAPSL	87.5	2.7945	37.875	11.0392	49.625	-1.98198	2372.35	-18.0521
LOC107131571	74.3333	2.34748	41.0625	25.9117	33.2708	-3.46442	1055.46	-13.2966
LOC112443018	60.9091	6.47978	23.1231	30.4877	37.7861	-2.23421	1361.04	-12.6542
LOC101907943	60.6746	69.5348	50.2191	20.5378	10.4555	1.75946	93.9339	-6.85788
LOC101908149	22.9171	7.11072	59.1162	17.1486	-36.1991	-1.27002	1381.53	-14.1441
LOC107131639	17.6349	1.81829	53.3542	8.23647	-35.7192	-2.17944	1348.98	-16.1417
LOC112443201	54.1667	2.31762	14.1667	9.15448	40	-1.98183	1528.05	-13.3188
LOC112443224	69.9015	29.5493	83.9604	8.04901	-14.0589	1.87624	229.447	-6.73485
LOC112443228	36.3125	12.8052	67.256	4.65948	-30.9435	1.45849	1019.95	-10.3225
LOC104975324	53.4132	60.5651	81.8452	8.66994	-28.432	2.80439	872.181	-11.5516
MFGE8	84.6518	692.383	58.1146	12802.5	26.5372	-4.20871	671.058	-13.7079
SLC28A1	79.4298	17.0578	54.6048	45.3967	24.8251	-1.41215	571.483	-7.61358
LOC100848238	95.875	3.29803	58	135.514	37.875	-5.36069	1390.43	-21.1743
LOC100847412	76.55	1.48635	48.85	8.63183	27.7	-2.53789	721.127	-9.71961
SNX33	90.0448	38.9345	66.0056	120.238	24.0392	-1.62677	535.17	-7.5832
LMAN1L	80.5536	4.78739	38.95	18.4711	41.6036	-1.94796	1655.72	-14.0012
LOC101907132	16.2941	49.7416	43.9462	10.822	-27.6521	2.20049	823.753	-10.1682
SERPINA1	61.7652	20.1892	27.3125	96.1459	34.4527	-2.25164	1126.67	-11.4116
EXOC3L4	73.1848	4.84826	36.4639	16.9893	36.7209	-1.80909	1282.11	-11.8161
LOC615559	63	6.06967	47.7917	16.0472	15.2083	-1.40264	204.796	-5.6585
LOC107131652	61.8781	17.3009	45.9392	45.0502	15.9389	-1.38068	226.103	-5.74781
VILL	57.2292	4.24131	30.0625	10.4118	27.1667	-1.29563	688.484	-8.19373
ACVR2B	18.2329	519.689	7.85725	253.932	10.3757	1.0332	90.1816	-5.57119
LOC112443426	86.9286	4.78675	59.3391	56.9067	27.5895	-3.57148	721.239	-11.9937
ACKR2	75.5474	15.1192	36.2933	61.0394	39.2541	-2.01336	1470.47	-13.0276
FAM107A	69.2016	49.0717	28.6538	1250.27	40.5479	-4.6712	1588.24	-19.4297
ACOX2	40.9938	7.55069	22.8719	82.6841	18.1219	-3.45293	305.706	-9.89931
DNASE1L3	71.3535	4.05832	54.2484	13.4569	17.1051	-1.72939	263.4	-6.28383
WNT5A	15.5303	8.8443	34.4765	21.8313	-18.9462	-1.30358	397.31	-7.71091
LOC104975561	11.4559	62.6518	41.9314	30.8358	-30.4755	1.02275	989.109	-9.89395
STAB1	16.3777	689.63	30.5211	292.773	-14.1434	1.23604	229.809	-5.90285
LOC101906101	70.5824	228.285	82.6049	34.3606	-12.0225	2.73201	176.646	-8.29049
MST1R	26.7754	10.4626	37.6733	31.4747	-10.8979	-1.58894	142.52	-6.37161
CATHL3	75.1986	9.06606	87.5188	2.44815	-12.3201	1.88878	180.316	-6.5406
RTP3	66.0975	6.05449	32.5179	14.667	33.5797	-1.27649	1065.79	-10.3155
LTF	87.5	876.069	76.5208	9336.61	10.9792	-3.41378	111.2	-9.16667
CCRL2	70.0425	2007.14	91.6833	458.495	-21.6409	2.13016	515.66	-8.50661
CCR5	26.3333	420.064	57.5083	203.642	-31.175	1.04457	1033.62	-10.1544
CCR9	85.75	44.6598	69.9858	142.558	15.7642	-1.6745	221.709	-6.01677
MGLL	46.1495	906.539	64.8971	261.164	-18.7475	1.79541	391.878	-7.38004
LOC112443431	86.1234	40.769	73.1244	9.13994	12.9989	2.15722	150.416	-8.2544
PLXNA1	15.2847	1410.63	59.4639	511.103	-44.1792	1.46465	2039.5	-16.0431
LOC101904622	36.4684	9.55258	53.93	20.1958	-17.4616	-1.08009	339.963	-6.99088
LOC104975626	48.7575	2.42416	32.4163	15.9598	16.3412	-2.71889	243.416	-7.82872
TREML2	33.375	1538.95	63.25	467.133	-29.875	1.72004	953.842	-10.2077
TREM1	9.25	1529.4	25.875	523.827	-16.625	1.54581	311.846	-6.65421
LOC112443745	71.3986	9.69672	37.2452	38.83	34.1534	-2.0016	1105.71	-11.0167
CYP39A1	83.4962	15.8481	48.2272	32.9972	35.269	-1.05803	1178.43	-10.922
ADGRF1	22.375	17.5964	45	350.915	-22.625	-4.31777	573.313	-18.4526
BOLA-DQA2	0	572.825	86	255.525	-86	1.16463	7562.52	-48.3779
LOC615223	80.6061	4.38825	64.9424	28.4889	15.6637	-2.69868	222.922	-7.70233
CFB	59.5417	363.511	45.7083	167.404	13.8333	1.11867	167.508	-6.27154
SLC44A4	63	26.2742	28.5	11.5282	34.5	1.18848	1127.19	-12.9179
AIF1	7	182.582	29.375	79.9878	-22.375	1.19069	545.978	-7.52516
LST1	38.5568	238.13	72.431	115.518	-33.8742	1.04363	1214.34	-11.1809
MUC21	48.7708	1.66715	58.9375	7.84945	-10.1667	-2.23521	128.005	-7.5454
PPP1R18	9.08435	2512.92	30.4934	823.244	-21.409	1.60997	503.141	-7.7006
NKAPL	57.1204	6.37325	36.6562	17.3868	20.4642	-1.44789	382.386	-6.61922
LOC104975682	79.8271	11.7809	57.5411	196.455	22.286	-4.05968	470.413	-12.3969
LOC112443735	30.4298	74.7965	49.6664	18.0261	-19.2366	2.05289	412.453	-7.87735
NEDD9	11.6136	885.83	49.2575	2898.84	-37.6439	-1.71038	1492.16	-15.8494
LOC101902551	72.5667	3.2064	37.2623	23.1321	35.3044	-2.85087	1187.34	-12.6467
LY86	52.9911	223.357	39.8745	92.3024	13.1166	1.27491	149.978	-6.39341
TUBB2A	17	1447.58	5	648.033	12	1.1595	123.746	-6.00996
LOC112444184	73.8782	88.5137	91.3805	30.7245	-17.5023	1.52651	343.394	-6.788
LOC281376	43.8333	587.703	22.1667	98.2223	21.6667	2.58096	436.502	-11.7412
DSG3	32.1298	9.01042	18.0229	20.7849	14.1069	-1.20587	174.15	-5.34508
HRH4	60.7917	7.60647	76.2292	2.36945	-15.4375	1.68268	271.991	-6.64022
SLC14A1	70.5739	4.51496	26.2493	9.85695	44.3246	-1.12643	1882.07	-15.0147
TNFRSF11A	52.1999	229.188	72.5833	95.212	-20.3834	1.26732	457.236	-7.11052
LOC786348	19.5889	586.974	45.7187	267.992	-26.1299	1.13111	735.107	-8.52267
LOC789192	33.75	3.71513	57.25	7.6665	-23.5	-1.04516	598.749	-8.65763
LOC531296	91	14.2806	75.75	95.4893	15.25	-2.74128	211.14	-7.74816
LOC101906195	63.7017	6.30974	42.7855	15.526	20.9162	-1.29904	399.862	-6.60557
PRSS27	72.9389	1.4099	28.6223	8.17475	44.3166	-2.53559	1886.12	-15.8754
LOC104975830	73.625	10.4433	33.5	146.013	40.125	-3.80544	1547.84	-16.5929
ZG16B	77.0417	2.17018	54.875	42.1238	22.1667	-4.27875	467.099	-13.1356
LOC100847890	46.3431	194.561	12.0416	439.49	34.3015	-1.17561	1113.19	-10.5608
LOC788915	89.3182	4.38078	77.5524	13.3741	11.7657	-1.61019	119.06	-5.46029
LOC101907661	24.5909	20.3983	55.9804	6.13105	-31.3894	1.73424	1049.56	-10.7392
GP2	82.1667	31.8521	67.3125	1127.67	14.8542	-5.14581	218.237	-15.9194
ACSM5	30.9583	2.26532	14.0833	13.4654	16.875	-2.57147	259.394	-7.59041
ACSM1	65.0625	1.36707	47.1458	8.41937	17.9167	-2.62263	293.901	-7.84148
METTL9	12.5	608.722	32.625	1450.93	-20.125	-1.25312	445.5	-7.95705
IGSF6	13.5833	1352.27	73.8	457.148	-60.2167	1.56465	3744.64	-25.8546
NUPR1	67.4611	275.488	24.95	748.041	42.5111	-1.44113	1728.76	-14.1529
LOC101907275	84.8333	78.7358	69.625	23.6001	15.2083	1.73823	206.772	-7.72074
QPRT	54.625	12.6789	29.25	35.9334	25.375	-1.50289	598.28	-7.82292
PRSS8	75.9814	187.142	31.4682	453.036	44.5132	-1.27549	1898.78	-15.1084
LOC107131831	68.5467	1	20.7143	6.95194	47.8324	-2.79742	2204.72	-17.966
ITGAX	20	2750.08	44.5	939.642	-24.5	1.54929	650.725	-8.40635
TPST1	86.625	25.5729	68.4226	58.7806	18.2024	-1.20073	298.657	-5.99791
NCF1	6.63156	2751.53	28.5924	542.458	-21.9609	2.34265	531.236	-8.96052
CLDN3	20.3126	294.432	6.29604	934.743	14.0165	-1.66664	172.969	-5.77434
LOC112444301	74.5875	3.77121	35.5025	13.9866	39.085	-1.89095	1457.1	-12.851
LOC101907369	67.083	1.80311	50.2831	8.09405	16.7999	-2.16637	255.207	-6.84598
CCL26	63.6063	2.55442	26.5982	38.0919	37.008	-3.89841	1314.05	-15.6952
POR	36.9333	1644.74	75.7	801.619	-38.7667	1.03687	1579.04	-13.2679
LOC112444342	87.2462	3.27338	70.0444	9.23602	17.2018	-1.49649	265.851	-6.05346
SH2B2	63.3637	96.0125	77.4601	34.5191	-14.0964	1.47583	229.114	-6.16448
LOC112444316	11.8348	18.083	47.4023	5.65902	-35.5674	1.67601	1337.05	-12.2525
SERPINE1	47.6815	2523.55	32.1354	603.861	15.5461	2.06316	217.847	-8.5684
TFR2	19.5476	14.6172	39.9498	7.0668	-20.4022	1.04853	457.466	-6.94586
PCOLCE	91.4333	517.631	73.825	139.555	17.6083	1.89109	281.558	-8.64208
PILRA	31.8958	1445.81	60.0625	567.202	-28.1667	1.34995	850.187	-9.305
LOC617785	66.7917	36.0068	79.4333	17.348	-12.6417	1.0535	186.252	-5.5169
AZGP1	43.4667	37.8364	27.2292	653.229	16.2375	-4.10974	249.326	-11.793
LOC101904258	35.5417	5.28145	19.9583	13.0402	15.5833	-1.30396	215.39	-5.63062
GJC3	75.7391	3.36502	58.145	6.83935	17.5942	-1.02325	277.701	-5.7897
LOC104975913	81.6401	2.22819	37.651	17.4716	43.989	-2.97107	1860.09	-16.3891
LOC107131857	28.994	1	18.8911	7.51561	10.1029	-2.90989	91.359	-7.74325
LOC101908535	76.8125	30.8816	55.5521	11.2979	21.2604	1.45069	414.949	-8.6396
LOC112444340	74.3847	3.36852	57.5786	15.1942	16.8061	-2.17333	255.431	-6.85813
AMZ1	79.4327	3.68747	45.2782	8.66176	34.1546	-1.23203	1103.53	-10.5183
IFIT3	3.39583	1198.98	25.875	395.397	-22.4792	1.60044	552.113	-7.94351
LOC100139670	3.39583	3997.28	25.875	1123.28	-22.4792	1.8313	552.973	-8.23744
PYROXD2	29.2029	10.9238	13.8733	26.9239	15.3297	-1.30141	208.026	-5.59072
AS3MT	53.8854	11.3054	22.6042	29.7117	31.2813	-1.39402	921.367	-9.54557
LOC112444522	72.125	2.39231	35.5	6.3439	36.625	-1.40697	1274.09	-11.5449
ACSL5	83.0625	1374.85	47.6458	638.348	35.4167	1.10686	1189.33	-13.1561
PLEKHS1	57.7	25.6403	23.2083	63.6494	34.4917	-1.31173	1126.21	-10.6708
AFAP1L2	82.925	47.9633	33.1979	267.402	49.7271	-2.47901	2384.36	-18.5445
ENO4	86.5516	7.6722	71.0312	30.2349	15.5204	-1.9785	215.568	-6.37945
SPADH1	75.5143	4.55237	37.8073	33.2095	37.707	-2.8669	1358.27	-13.5623
LOC112444485	7.5947	40.8467	31.4129	15.6062	-23.8182	1.3881	615.96	-8.06443
DEFB7	36.7031	215.483	65.2344	63.8293	-28.5312	1.75528	872.93	-9.81357
DEFB4A	37.2667	521.386	68.925	218.32	-31.6583	1.25591	1065.46	-10.4356
ENPP6	85.0625	5.60568	65.625	12.8236	19.4375	-1.19384	342.778	-6.2321
LRP2BP	50.7187	87.0786	17.0804	24.6993	33.6384	1.81785	1072.2	-14.0664
F11	67.1458	18.3352	54.9792	4.04511	12.1667	2.18037	131.165	-8.14885
MSR1	6.125	2475.17	19.1875	1099.24	-13.0625	1.17102	198.167	-5.68203
TCIM	63.2509	55.3332	31.2146	261.431	32.0363	-2.24021	970.561	-10.5658
DKK4	26.5055	18.1532	64.5265	3.64953	-38.021	2.31444	1525.02	-14.025
CHRNB3	16.2195	10.7682	36.3066	21.6102	-20.0872	-1.00493	443.419	-7.57869
LOC112444727	55.8204	3.98428	35.2158	8.58312	20.6046	-1.10718	387.112	-6.42987
PHYHIPL	26.4326	10.1919	13.975	429.683	12.4576	-5.39778	159.933	-17.044
CTNNA3	81.1875	13.9341	68.6042	69.0663	12.5833	-2.30937	139.945	-6.59943
LOC112444761	82.75	1.43605	46.5	7.27527	36.25	-2.3409	1250.7	-12.1891
SRGN	6	30178.5	50.875	13750.1	-44.875	1.13408	2101.83	-16.2976
HKDC1	81.1875	15.4813	32.125	6.34174	49.0625	1.28758	2316.59	-20.9102
LOC112444743	78.0591	6.03034	59.0237	37.8712	19.0353	-2.65079	333.246	-8.07097
LOC107131941	86.8688	996.139	66.2344	175.098	20.6344	2.50818	394.411	-11.1896
LOC112444740	79.9583	51.8503	56.9167	20.2927	23.0417	1.35339	490.166	-8.96917
WDFY4	10.275	6183.25	45.2917	2571.91	-35.0167	1.26553	1295.8	-11.7344
TMEM72	74.9189	5.68087	36.7708	14.7435	38.1481	-1.3759	1385	-12.1667
AGT	81.1973	2.11838	63.4732	6.39908	17.7241	-1.59491	283.372	-6.23788
LOC101905267	73.4163	39.3244	58.2458	17.3529	15.1705	1.18025	203.902	-6.63421
PRSS23	63.75	26.8269	24.7292	140.06	39.0208	-2.3843	1454.18	-13.3394
LOC112444864	81.2232	4.00273	52.7164	8.7702	28.5068	-1.13162	760.192	-8.53352
KCTD14	25.0197	12.6017	12.1409	46.5254	12.8788	-1.8844	145.248	-5.93012
LOC101902283	66.4938	4.63475	45.4722	12.564	21.0216	-1.43874	404.424	-6.72923
LOC112444895	74.875	5.27005	34.875	38.4147	40	-2.86577	1532.07	-14.4717
SCGB2A2	73.125	2.42416	29.8125	68.7664	43.3125	-4.82615	1816.24	-21.0574
CSKMT	38.65	72.9936	19.75	164.997	18.9	-1.1766	323.16	-6.11584
FERMT3	11.7795	1834.56	32.5	876.464	-20.7205	1.06567	471.202	-7.03176
CCDC88B	6.13286	248.286	36.5296	81.1649	-30.3967	1.61308	985.894	-10.272
LOC104976281	85.0266	26594	65.1136	4241.05	19.913	2.64861	367.3	-11.4156
CTSW	9.625	143.991	39.125	745.932	-29.5	-2.37306	932.333	-13.8336
CNIH2	15.8739	2.57288	48.0114	14.1929	-32.1374	-2.46371	1100.34	-15.2768
LOC112444928	29.625	3.04948	13.3125	12.7847	16.3125	-2.06778	239.609	-6.62156
LOC508879	76.9792	52.7321	44.9972	625.727	31.982	-3.56878	974.518	-13.1703
ALDH3B1	55.1458	230.624	35.9246	95.3859	19.2212	1.27369	335.751	-7.7373
LOC112444924	19.1988	101.061	74.6521	31.3409	-55.4534	1.6891	3185.03	-22.6765
LOC507247	64.8856	195.64	82.9923	63.9263	-18.1067	1.61372	366.367	-7.00981
LOC112444899	65.4914	1.55534	26.7109	7.63252	38.7805	-2.29493	1435.55	-13.1292
SLC22A18	55.0312	123.74	30	40.6403	25.0312	1.60633	582.842	-10.1575
TSPAN32	0	1555.7	11.25	506.508	-11.25	1.61891	152.027	-5.99953
LOC101902537	71.438	4.40515	45.592	13.0148	25.846	-1.56289	621.676	-7.99545
H19	61.3128	59.7032	44.7985	8.80628	16.5142	2.7612	250.613	-10.8279
IFITM10	66.3056	18.0945	16.125	47.9087	50.1806	-1.40474	2424.95	-18.1663
MUC5AC	76.275	138.284	43.3333	6.72244	32.9417	4.3625	1043.62	-23.874
CRACR2B	59.25	5.9218	26.8125	40.129	32.4375	-2.76054	998.114	-11.5123
PNPLA2	66.1667	210.305	29.25	478.883	36.9167	-1.18719	1294.48	-11.6055
CDHR5	88.294	63.1488	77.0354	6.2439	11.2587	3.33824	118.355	-11.5938
SIGIRR	32.8115	38.9231	12.4667	87.8156	20.3448	-1.17385	377.102	-6.40806
PKP3	87.3115	61.6012	67.0118	157.698	20.2997	-1.35614	375.764	-6.51452
IFITM1	8.11036	1441.79	31.2174	477.04	-23.107	1.59568	581.913	-8.09376
LOC613699	50.3623	79.3054	73.3695	26.6379	-23.0072	1.57394	577.043	-8.04409
LOC112445246	64.25	13.1838	48.375	5.68895	15.875	1.21254	224.518	-6.83694
LOC112445107	73.6852	1.4099	59.0811	5.38022	14.6041	-1.93208	189.544	-6.19444
AVPR2	73.971	5.79724	56.6637	95.3487	17.3072	-4.03978	282.621	-11.6532
BTK	43.7917	726.826	80.2083	320.065	-36.4167	1.18324	1398.25	-12.2771
RTL9	82.2755	21.8236	70.4157	10.2438	11.8597	1.09114	120.493	-5.88264
HMGN5	17.25	38.2292	30.4107	96.587	-13.1607	-1.33715	200.61	-6.39611
NLGN3	56.806	147.56	43.0744	51.3462	13.7316	1.52297	166.083	-6.96427
CFP	30.125	891.84	64.6667	309.021	-34.5417	1.52908	1262.67	-11.7186
VSIG4	23.75	1494.19	61.125	447.194	-37.375	1.7404	1472.59	-13.0579
GPR82	39.6429	14.9873	55.1057	5.77824	-15.4628	1.37504	271.79	-6.25703
GPR34	29.75	148.851	53.75	68.3122	-24	1.12365	624.259	-7.90624
TSPAN7	22.4528	14.9932	34.425	7.26235	-11.9722	1.0458	168.48	-5.42116
XK	57.3167	35.3935	44.1042	444.12	13.2125	-3.64939	162.567	-10.0124
CXHXorf21	35.1667	251.404	64.625	121.488	-29.4583	1.0492	926.271	-9.54968
ACE2	73.0361	3.98706	52.9536	20.0932	20.0825	-2.33331	370.726	-7.65681
TLR8	24.5316	1098.82	70.1579	439.552	-45.6263	1.32185	2171.78	-16.7419
MID1	79.308	83.6848	54.6804	1013.89	24.6276	-3.59879	572.41	-11.4058
ARSE	71.8125	4.70132	44.625	20.9337	27.1875	-2.15469	692.288	-8.99385
LOC790181	35.5556	303.42	50.6	143.346	-15.0444	1.08181	257.423	-5.90467
LOC112445525	89.0863	1.99139	41.9849	16.5954	47.1014	-3.05894	2138.17	-18.0237
LOC509374	46.4	2.77783	32.2583	7.10313	14.1417	-1.3545	175.403	-5.46879
LOC786297	49	3.68378	23.375	8.47259	25.625	-1.20162	609.827	-7.71092
LOC104971226	69.4167	3.37841	50.8583	7.4348	18.5583	-1.13795	310.935	-6.028
LOC509854	57.5833	4.51546	79.3039	14.0672	-21.7206	-1.63939	516.314	-9.13518
LOC112445793	10.875	3.21779	30.4697	8.00268	-19.5947	-1.31441	423.565	-7.9073
LOC787803	82.3489	85.6767	63.5113	236.466	18.8376	-1.46466	321.599	-6.31309
LOC112445852	68.6944	5.21774	51.227	14.4693	17.4675	-1.47149	274.488	-6.07494

## Sheet: TableS10C_FirstIntron_DMEGs
Table S10C List of identified differentially methylated (first Iintron) and expressed genes (DMEGs)
gene_ID	SCpositivemethmean	SCpositiveexpmean	controlmethmean	controlexpmean	first intron methylation change	gene expression change	var	GMM_score
LOC112447120	34.2292	696.045	56.2184	131.702	-21.9893	2.40191	632.883	-11.2598
LOC100848368	17.6455	17.8224	69.4286	3.64312	-51.7831	2.29044	3011.38	-32.0131
LOC112447173	0	77.4912	22.75	15.3381	-22.75	2.33692	671.216	-11.4673
LOC112447295	80.3354	104.24	64.3336	21.8943	16.0017	2.25128	173.757	-9.11411
CD80	36.1056	540.519	46.3778	226.7	-10.2722	1.25356	179.135	-5.9849
SLC15A2	70.7186	10.6365	35.8776	128.372	34.841	-3.59323	1023.28	-16.3335
LOC112447313	7.66667	3.38939	61.75	14.973	-54.0833	-2.14326	3266.97	-40.4795
LOC104970904	88.8523	1.36707	74.0321	8.8978	14.8202	-2.70237	145.353	-7.52975
ATP13A4	77.2905	35.3704	29.1461	431.213	48.1444	-3.60779	2046.51	-24.96
LOC104970906	46.2266	7.78535	57.8901	2.23749	-11.6635	1.79888	219.928	-6.96647
LOC101906248	84.1806	20.8563	69.0709	8.47645	15.1096	1.29895	147.775	-6.74615
LOC101906451	86.5774	4.59762	59.7319	15.9322	26.8455	-1.79298	569.477	-9.54609
EPHB3	49.5316	39.1324	33.1521	101.093	16.3794	-1.36925	179.474	-5.84044
LOC112447525	9.65625	15.468	46.625	3.23275	-36.9688	2.25846	1606.38	-19.4173
LOC104970977	70.697	1.66715	31.3333	33.4223	39.3636	-4.32536	1336.98	-20.8447
CPA3	13.0833	51.8551	44.125	15.6849	-31.0417	1.72511	1164.98	-14.9771
TMPRSS2	40.3837	66.5079	29.9852	246.423	10.3985	-1.88954	57.2183	-5.495
RIPK4	68.776	50.1651	46.5169	113.121	22.259	-1.17311	370.474	-7.37716
TFF3	61.7001	32.1634	43.4646	1382.31	18.2355	-5.42552	258.854	-17.3927
S100B	36.2872	151.114	25.342	4492.6	10.9452	-4.89384	85.0923	-14.3677
LOC107132224	10.8333	181.247	58.7583	44.0584	-47.925	2.04047	2602.09	-28.1303
MSTN	71.7583	4.93434	51.1002	23.1218	20.6582	-2.22833	314.79	-7.933
NOSTRIN	84.1252	14.5506	71.6407	201.291	12.4845	-3.79013	102.531	-10.2107
LOC112442568	28.575	7.51948	43.1667	3.31783	-14.5917	1.18039	312.588	-7.04648
LOC112442668	89.8342	21.7124	68.6734	4.39169	21.1608	2.30567	334.387	-11.1617
CXCR2	45.6458	9237.86	30.8917	3823.33	14.7542	1.27273	139.245	-6.60534
LOC104971307	87.4583	74.7051	76.8958	23.625	10.5625	1.66089	59.8515	-6.34919
SLC11A1	42.8472	3259.3	76.643	960.699	-33.7958	1.76241	1360.42	-16.749
IRS1	73.5655	165.27	62.8884	1127.93	10.6771	-2.77078	65.2531	-7.20678
C2H2orf72	62.5323	4.8258	51.1751	61.7211	11.3572	-3.67692	81.6914	-9.76347
FABP3	47.7681	634.174	34.275	16069.6	13.4932	-4.66331	129.736	-13.5108
FGR	29.762	2883.65	40.3869	861.692	-10.6249	1.74265	190.252	-6.6553
FAM46B	64.0156	38.7486	42.7381	89.5899	21.2775	-1.20919	333.782	-7.06889
TRNP1	47.1077	10.4981	58.3176	28.0195	-11.2099	-1.41631	204.657	-7.10286
ZDHHC18	65.8868	3841.93	55.3586	1568.03	10.5281	1.29288	58.1443	-5.68732
CRYBG2	60.5904	36.0824	39.0287	89.2438	21.5617	-1.30645	344.448	-7.21648
CNKSR1	55.6657	12.554	41.9257	37.5861	13.7399	-1.58206	116.585	-5.53043
ASAP3	67.995	7.26308	57.8175	80.985	10.1775	-3.479	62.097	-9.08275
LOC112443471	76.3511	10.3498	59.326	37.6075	17.0251	-1.86141	198.568	-6.501
LOC112443502	34.9167	4428	9.78125	2074.38	25.1354	1.09398	489.778	-10.063
FCER1G	23.799	5825.39	71.2259	2098.35	-47.4269	1.4731	2549.42	-27.4256
KLHDC9	73.875	2.9661	46.4792	10.6882	27.3958	-1.84938	596.172	-9.83028
RAB25	73.9948	40.5987	63.3849	186.334	10.6099	-2.19839	61.5498	-6.02047
MUC1	59.5	112.35	49.1458	2124.63	10.3542	-4.24113	70.3184	-11.6873
RAB13	77.4542	14.4526	61.6762	92.1849	15.778	-2.6732	168.69	-7.62631
S100A8	5.39444	513.438	19.9402	145.4	-14.5457	1.82016	313.072	-7.73871
S100A9	16.4937	685.968	27.5491	288.148	-11.0554	1.25133	200.591	-6.15947
LOC507527	79.2469	11.4779	64.7862	3.87282	14.4607	1.56741	133.374	-7.06889
RORC	66.5929	23.2046	53.2792	83.9045	13.3137	-1.85434	108.503	-5.80007
CGN	58.8027	45.3397	37.8373	104.504	20.9654	-1.20472	322.485	-6.96684
SELENBP1	61.3402	17.1492	47.624	315.794	13.7161	-4.20278	130.495	-11.7463
TMOD4	76.1568	16.7791	60.6355	242.779	15.5213	-3.8549	169.598	-10.7534
TNFAIP8L2	19.6366	522.034	56.058	194.241	-36.4214	1.42629	1559.58	-18.3467
GOLPH3L	39.9239	210.334	25.9995	791.857	13.9244	-1.91256	121.628	-5.97644
FCGR1A	19.8125	777.883	50.5833	205.153	-30.7708	1.92285	1147.37	-15.0046
TENT5C	51.3787	389.481	38.4286	2423.69	12.9502	-2.63758	104.461	-7.13057
OLFML3	83.1403	31.1221	57.7776	64.4851	25.3626	-1.05103	499.172	-8.49346
BCL2L15	15.75	63.1029	56.375	346.045	-40.625	-2.45518	1911.9	-27.6678
RHOC	30.2604	165.384	13.4045	786.785	16.8559	-2.25015	195.354	-7.03649
LOC104971585	5.6119	15.5041	22.6264	4.54044	-17.0145	1.77174	405.802	-8.43661
C3H1orf162	67.5927	4549.78	85.7883	1239.49	-18.1955	1.87605	454.977	-8.98161
LOC615514	87.8458	2.81738	65.8403	12.8125	22.0055	-2.18513	363.906	-8.26666
GSTM1_1	49.375	2.99617	18.3861	34.5303	30.9889	-3.52667	792.655	-14.3133
CELSR2	91.8315	475.466	79.097	230.918	12.7345	1.04196	95.4029	-5.75484
VCAM1	67.3437	129.907	43.5536	41.9333	23.7902	1.63132	433.754	-10.556
GBP4	21.7667	849.536	40.9667	228.351	-19.2	1.89542	498.723	-9.37275
SELENOF	55.0007	681.998	42.1814	2033.52	12.8194	-1.57614	97.7136	-5.37875
GIPC2	74.8988	17.6794	64.0541	562.184	10.8447	-4.9909	84.4455	-14.7971
CTH	68.3264	29.2558	58.3073	106.96	10.0191	-1.87028	51.7099	-5.4322
LOC104971707	82.6273	34.8253	55.1467	8.42765	27.4806	2.04693	602.18	-13.431
LOC530929	72.7994	94.0442	53.7779	256.053	19.0216	-1.44503	257.141	-6.55722
ECHDC2	77.2696	55.0791	60.1291	166.018	17.1405	-1.59176	200.954	-6.21778
HPDL	79.3221	5.10593	51.0994	19.945	28.2227	-1.96578	637.547	-10.3042
MPL	29.5903	4.35043	72.5	16.7954	-42.9097	-1.94883	2114.55	-28.1297
TIE1	44.5069	2.22819	67.1576	7.76448	-22.6508	-1.80102	662.718	-12.7441
LOC510369	74.0658	3.95043	52.7969	59.0739	21.2689	-3.90244	346.474	-12.0106
C3H1orf210	67.5151	17.5697	50.5488	238.132	16.9663	-3.7606	207.067	-10.6731
LOC782545	76.7636	1.699	66.2255	6.61606	10.5381	-1.96129	59.5484	-5.61748
FHL3	19.0469	855.519	30.8797	373.998	-11.8329	1.19377	222.956	-6.29431
LOC101904166	88.6955	128.511	78.1954	42.0819	10.5002	1.61061	58.7391	-6.23982
TMEM35B	26.9575	16.0063	12.8466	89.7874	14.111	-2.48787	128.094	-6.97916
LOC104971852	61.0848	2.6291	48.6554	9.65266	12.4294	-1.87636	91.1894	-5.70553
EFHD1	70.0523	117.908	54.8283	1785.19	15.2241	-3.92035	162.755	-10.9293
SH3BP4	67.6942	463.491	51.6156	2779.51	16.0786	-2.58422	175.997	-7.49736
LOC112446042	66.75	5.98223	78.5917	12.3109	-11.8417	-1.04118	222.244	-6.75129
IL3RA	3.03897	78.2152	14.5224	19.2613	-11.4834	2.02174	215.582	-7.27918
LOC107132360	50.7206	93.9292	34.1109	26.0535	16.6096	1.8501	188.128	-8.3046
ABCA13	87.8765	47.3912	70.8582	11.5814	17.0183	2.03281	200.147	-8.87674
AGR2	80.8565	4.0673	61.0625	93.7626	19.794	-4.52687	299.963	-13.845
LOC112446475	84.2319	9.29039	72.8351	2.98181	11.3968	1.63955	73.0251	-6.47693
LOC781951	73.8333	9.83227	92.3333	60.6743	-18.5	-2.62549	470.099	-12.8134
HOXA6	76.8883	9.44994	59.0516	21.6886	17.8368	-1.19856	220.09	-6.06749
HOXA5	70.519	6.11727	35.5859	13.5611	34.9332	-1.14851	1018.25	-13.2637
HOXA4	85.6014	2.5634	57.2998	7.48365	28.3015	-1.54568	640.165	-9.97606
MYO1G	18.8502	1544.65	35.7024	679.259	-16.8522	1.18525	397.42	-7.78547
GCK	83.8773	38.9254	73.0349	980.817	10.8424	-4.6552	81.2655	-13.3441
AEBP1	79.4699	10.5548	61.5407	21.6888	17.9292	-1.03905	222.524	-6.00614
LOC107132422	90.875	2.82635	79.875	9.60811	11	-1.76531	66.014	-5.37885
PARP12	50.38	1042.97	39.2967	515.463	11.0832	1.01675	66.0511	-5.38325
LOC100296901	72.9321	16.8093	61.4597	4.54279	11.4723	1.88761	75.2384	-7.01012
LOC615948	78.5417	4.71471	58.875	12.2875	19.6667	-1.38195	278.018	-6.68818
LOC786254	86.625	2.09222	75.8333	7.13503	10.7917	-1.76988	62.7552	-5.36291
EPHB6	71.2529	4.62906	60.6581	16.7595	10.5948	-1.85619	60.0299	-5.46465
LOC104972290	78.9146	2.71654	63.7442	8.13448	15.1704	-1.58228	149.246	-5.78847
ASIC3	53.6841	42.6704	26.7024	101.197	26.9817	-1.24587	574.472	-9.2359
GLYCAM1	86.2935	3685	64.9929	152719	21.3006	-5.37307	360.854	-17.6899
GPR84	38.3583	1603.27	69.7083	387.857	-31.35	2.04742	1187.4	-15.4903
NFE2	26.3277	1001.52	56.6176	305.239	-30.2899	1.71418	1114.26	-14.5174
ANKRD33	77.5625	39.7281	57.4167	10.1248	20.1458	1.97226	297.111	-9.84996
SLC4A8	66.4762	176.23	30.3968	76.8484	36.0794	1.19737	1093.46	-16.4894
GPD1	75.8018	45.3414	37.375	646.425	38.4268	-3.83358	1265.93	-18.9104
AQP5	55.9322	1.98191	45.6567	7.11152	10.2755	-1.84327	55.2626	-5.4155
LALBA	79.875	3272.59	65.375	108693	14.5	-5.05369	155.484	-15.2601
PTPRB	60.8996	44.4312	50.7443	20.3634	10.1553	1.12559	52.2471	-5.36724
BEST3	87.9306	3.00565	70.5756	35.3639	17.355	-3.55653	216.609	-10.1244
LOC112446696	92.5917	45.9168	78.0278	18.0247	14.5639	1.34905	135.045	-6.68732
ITGA7	70.6991	14.7799	46.7225	95.4571	23.9766	-2.69122	444.885	-9.74669
NEUROD4	23.0759	5.75313	54.9439	16.4129	-31.868	-1.51241	1220.38	-17.8567
IGF1	71.7815	215.045	57.8374	83.6327	13.9441	1.3625	121.183	-6.551
PAH	72.2975	98.4613	58.7254	4899.41	13.5722	-5.63691	141.147	-17.9657
LOC112446721	92.066	49.4479	81.813	15.5279	10.2531	1.67104	55.3284	-6.30948
LOC788334	40.5351	52.4937	51.4494	19.7871	-10.9142	1.40758	197.093	-6.28911
CSF2RB	61.3552	4349.55	47.4938	12822.9	13.8614	-1.55978	119.136	-5.5266
IL2RB	11.6786	408.313	31.5913	1126.72	-19.9127	-1.46438	528.531	-10.6288
LOC107132508	91.6875	250.873	73.7982	86.913	17.8893	1.52932	223.322	-8.02353
CARD10	67.7968	10.275	44.2138	21.4782	23.583	-1.06373	422.904	-7.80616
MANSC4	84.6625	8.22681	64.1113	288.573	20.5512	-5.13246	331.588	-16.4638
GPR19	30.8857	4.21096	15.0646	21.8801	15.8212	-2.3774	168.382	-7.05467
LOC112446743	80.7917	2.34748	68.4167	22.2757	12.375	-3.24629	96.8003	-8.56044
LOC101905165	43.6667	2.59725	25	10.3927	18.6667	-2.00052	247.679	-7.07262
CD69	21.125	1280.92	47.7903	637.785	-26.6653	1.00604	883.662	-12.0536
CLECL1	51.7357	193.763	75.1787	63.4866	-23.443	1.60977	704.366	-10.8129
CLEC4A	17.4375	652.214	61.9667	266.92	-44.5292	1.28894	2264.78	-24.7859
CLEC6A	90.6857	263.923	80.0521	85.672	10.6336	1.62322	60.7925	-6.28993
CLEC4E	44.375	191.495	65.9356	51.5662	-21.5606	1.89281	609.28	-10.3026
LOC112446758	72.266	4.59762	29.2368	9.96316	43.0292	-1.11572	1600.16	-18.6593
LPAR5	48.45	117.027	18.1861	45.0133	30.2639	1.37842	743.504	-13.2779
SCNN1A	77.067	33.0201	44.2449	138.065	32.8221	-2.06393	890.726	-12.6077
B4GALNT3	80.3225	44.5395	63.699	288.999	16.6235	-2.69791	191.074	-7.83315
LOC112446766	43	1.59817	12.3333	8.92119	30.6667	-2.48082	768.76	-12.0701
LGALS1	49.9523	3757.05	34.7985	1492.18	15.1537	1.33218	148.939	-6.81646
GCAT	42.3642	17.5537	32.3462	287.59	10.018	-4.03417	63.859	-10.9165
SOX10	21.2791	111.175	9.13819	1383.02	12.1409	-3.63692	95.0623	-9.69159
LOC101905166	78.3853	12.0277	49.5946	125.177	28.7907	-3.37954	673.634	-13.0139
FAM83F	83.2045	57.4698	66.7705	276.147	16.4341	-2.26456	183.935	-6.97471
ZC3H7B	60.8062	142.213	49.1142	443.131	11.692	-1.63968	77.1184	-5.29838
PNPLA3	42.4132	18.804	30.5616	400.579	11.8517	-4.41297	95.908	-12.4053
LOC101908206	44.3914	15.8544	32.9481	224.806	11.4433	-3.82573	84.2052	-10.2556
LOC107132550	64.9375	19.6349	50.8375	9.5527	14.1	1.03944	123.74	-6.06983
LOC511175	70.4375	1.6913	80.875	10.4884	-10.4375	-2.63259	187.822	-9.54948
ABCG2	64.5	141.996	86.9167	3797.55	-22.4167	-4.74114	669.148	-23.6391
LOC112447058	77	3.11746	45.5	58.9179	31.5	-4.24026	826.828	-16.5698
SLC34A2	76.9886	104.541	60.5571	4801.28	16.4314	-5.52128	208.298	-17.6206
C6H4orf19	77.8373	13.396	65.9361	62.1001	11.9012	-2.21279	82.8288	-6.17654
LOC112447093	77.9045	1.65617	59.231	8.86804	18.6734	-2.42076	249.63	-7.73539
CSN1S1	77.375	23948.4	54.8259	855219	22.5491	-5.1583	405.812	-17.0112
CSN2	85.0277	33756.8	61.05	1.40335e+06	23.9777	-5.37755	465.844	-18.3325
HSTN	82.7005	614.977	69.3448	19390.8	13.3557	-4.97869	129.832	-14.8429
CSN1S2	77.3333	10617.7	62.0833	414012	15.25	-5.28514	175.565	-16.3798
CSN3	74.0443	6953.22	44.3237	297632	29.7206	-5.41971	739.767	-20.3177
LOC104968905	55.7582	9.2162	76.5612	216.794	-20.803	-4.55601	587.931	-21.7309
CXCL11	63.6667	11.9412	30.4167	61.9184	33.25	-2.37442	917.69	-13.1973
LOC112447110	70.2524	17.5983	84.7625	3.54102	-14.5102	2.3132	313.999	-8.54443
PLAC8_1	72.2721	64.0523	83.1234	15.7276	-10.8512	2.02595	197.637	-7.15113
LOC112441472	79.625	4.10315	39.875	15.0669	39.75	-1.87657	1350.71	-16.5423
FGFBP1	70.7881	53.7743	43.1468	1421.09	27.6413	-4.72394	626.272	-16.741
PROM1	86.5009	177.765	73.4176	560.718	13.0833	-1.65731	103.185	-5.51223
LOC112447135	69.6867	124.731	49.7619	26.4295	19.9248	2.2386	290.794	-10.4709
SH3BP2	82.2651	4039.79	68.0217	1427.41	14.2435	1.50089	128.238	-6.88209
LOC101906603	17.3825	31.2402	51.008	10.8898	-33.6255	1.52043	1347.05	-16.4658
LOC100299277	61.5735	8.00605	46.7054	17.7271	14.8682	-1.1468	140.94	-5.35722
LOC112447323	61.4307	92.8686	72.5668	30.1989	-11.136	1.62069	204.037	-6.59811
HSH2D	52.7372	196.817	70.969	68.3803	-18.2318	1.5252	455.225	-8.57501
LYL1	14.8611	166.49	50.1541	69.5171	-35.293	1.25999	1471.31	-17.4867
NFIX	58.8414	101.412	31.0818	1291.04	27.7596	-3.67024	623.559	-13.3592
ICAM3	22.7538	1062.77	37.1736	430.455	-14.4198	1.30389	306.9	-7.1004
AP1M2	37.0913	58.0191	26.3352	425.39	10.7561	-2.87419	67.021	-7.45964
CNN1	36.7276	2.84881	22.6669	7.0456	14.0608	-1.30636	122.836	-5.32082
MCEMP1	8.72917	704.713	21.0625	161.362	-12.3333	2.12674	241.454	-7.65405
LOC100337044	44.799	32.6981	33.9502	13.2585	10.8488	1.30229	63.0773	-5.76271
LOC100337081	79.9152	54.5045	65.5191	18.7052	14.3961	1.54294	131.822	-7.00356
SH2D3A	54.2641	7.46397	39.706	20.6998	14.5582	-1.4716	134.46	-5.55996
C3	62.6737	1520.37	37.5486	5649.08	25.1252	-1.89359	490.868	-8.96747
STAP2	79.4195	23.698	62.0704	247.456	17.3491	-3.38433	215.293	-9.63547
CELF5	52.4499	26.8028	42.1717	7.63457	10.2782	1.81176	56.2206	-6.59993
PEAK3	21.9269	86.1441	75.6574	40.0482	-53.7304	1.10502	3224.32	-33.7384
SLC22A5	69.5106	48.8196	52.3379	154.64	17.1727	-1.66338	202.078	-6.30038
FBN2	16.237	5.43017	26.7673	132.008	-10.5303	-4.60348	204.036	-16.979
DOK3	36.4458	56.4665	66.4538	15.9211	-30.0079	1.82646	1095.97	-14.4563
NLRP3	14.5789	1194.11	54.2855	309.676	-39.7067	1.9471	1831.55	-21.1138
GCSAML	79.3016	19.7272	68.499	5.63353	10.8026	1.80807	64.0746	-6.69666
THEG	82.3517	1.39322	65.7386	6.80917	16.6131	-2.28906	188.867	-7.05222
REEP6	42.9992	16.8969	30.0471	278.333	12.9521	-4.04198	113.483	-11.1039
SH3RF2	37.8193	11.9956	20.307	114.899	17.5123	-3.2598	219.2	-9.33173
PPP2R2B	77.5	1.9301	93.625	10.3417	-16.125	-2.42172	372.459	-11.1355
FAT2	80.3055	21.4883	62.2172	129.45	18.0882	-2.59077	232.478	-7.91817
LOC104969225	58.6979	5.63292	29.3438	2.63317	29.3542	1.09708	694.021	-12.1859
LOC112447475	64.8716	11.7411	75.6381	3.42411	-10.7665	1.77776	194.275	-6.73672
WWC1	79.8251	158.051	63.2299	415.398	16.5952	-1.3941	185.338	-5.9096
LOC104969002	16	123.051	34.625	41.2047	-18.625	1.57838	472.288	-8.77501
FAM167A	70.757	40.6069	58.4042	17.0699	12.3529	1.25027	88.6846	-5.98675
NFIB	42.2075	334.692	19.8111	4363.23	22.3964	-3.70449	387.404	-11.7044
KLF9	75.9965	51.7598	63.9243	215.682	12.0723	-2.059	85.2766	-5.93714
ALDH1A1	75.7576	96.3527	60.5557	731.757	15.2019	-2.92497	155.684	-8.09279
LGI3	87.7939	2.63808	75.9567	10.648	11.8373	-2.01302	80.9117	-5.83596
SLC39A14	80.6355	84.0497	68.6657	257.999	11.9698	-1.61805	81.9395	-5.30809
B4GALT1	54.5352	1506.44	37.2179	3262.5	17.3173	-1.11484	204.818	-5.88782
SLC28A3	88.1842	145.193	76.7963	1287.36	11.3879	-3.14838	78.7459	-8.20968
OGN	92.4583	14.7596	75	70.46	17.4583	-2.25515	212.384	-7.17351
BSPRY	41.6093	43.3876	28.8949	307.516	12.7143	-2.82531	100.815	-7.52384
LOC104969458	58.3805	25.5178	80.128	11.7976	-21.7475	1.11302	615.944	-9.67501
LOC101906836	17.317	271.937	58.7688	134.927	-41.4518	1.01109	1980.76	-22.1702
SH3YL1	77.2351	84.4154	67.046	290.682	10.1892	-1.78386	53.8222	-5.32301
LOC112448017	68.1042	2.22819	31.5083	17.3824	36.5958	-2.96369	1134.02	-15.9433
ECHDC1	83.809	271.179	70.5913	2507.03	13.2177	-3.20866	113.013	-8.54415
MFSD4B	62.6053	106.674	42.8487	46.8718	19.7566	1.18641	281.241	-8.02048
DDO	65.9338	1.4622	41.5236	17.3313	24.4102	-3.56716	468.462	-11.912
LOC104969545	9.95	32.4586	37.3806	12.7701	-27.4306	1.34583	930.607	-12.6196
LOC101906317	5.75	714.786	18.875	191.883	-13.125	1.89728	265.432	-7.4686
LOC112448069	84.6552	2.39231	73.1856	12.4385	11.4695	-2.37834	76.0773	-6.43675
STX11	52.1667	908.616	84.5833	196.102	-32.4167	2.21207	1262.64	-16.3447
LOC112448082	93.7989	3.07791	83.7546	85.0363	10.0443	-4.78806	70.664	-13.8953
LOC112448093	92.5	11.4634	71	27.7513	21.5	-1.27553	342.094	-7.17785
THBS2	21.6277	22.6355	10.7131	7.12015	10.9145	1.66861	65.3003	-6.43444
ANKRD31	70.875	41.0915	31.5	18.9499	39.375	1.11665	1321.89	-18.636
LOC101904831	80.5087	6.90991	70.3767	35.6041	10.132	-2.36531	55.2557	-6.29411
F2RL2	82.1977	391.124	71.99	178.916	10.2077	1.12834	53.0031	-5.38026
LOC101903546	71.2456	345.098	83.0358	108.842	-11.7901	1.66477	223.167	-6.80724
LTB4R	21.762	292.622	53.8799	117.354	-32.1179	1.31817	1238.14	-15.3822
CEBPE	51.4973	30.9387	85.71	11.5385	-34.2126	1.42296	1390.13	-16.8061
MMP14	40.0691	2629.51	26.9813	993.211	13.0878	1.40462	103.369	-6.41605
LOC112448411	75	2.04169	88	8.73837	-13	-2.0976	261.076	-9.06325
LOC407201	85.5	3.05176	67	12.3598	18.5	-2.01794	242.563	-7.05533
LOC100298823	60.375	2.95662	39.5	6.61609	20.875	-1.16203	319.164	-6.91636
LOC616138	82.0833	1.32424	66.3333	9.56553	15.75	-2.85268	168.92	-8.01465
LOC100337168	90.4167	3.35754	78.3056	22.8221	12.1111	-2.76495	89.1854	-7.31958
LOC789029	73.9167	1.65617	53.8333	11.1413	20.0833	-2.75	297.313	-8.7153
LOC104968753	18.5333	4.46052	42.75	27.7812	-24.2167	-2.63883	749.109	-15.9444
ARHGEF40	73.225	411.758	57.5	162.954	15.725	1.33733	163.121	-6.9859
RNASE1_1	82.0504	59.6075	53.7723	694.838	28.2781	-3.54311	648.581	-13.22
RNASE6	27.2278	2575.22	65.9494	954.067	-38.7216	1.43253	1746.43	-20.0519
CHAC1	49.2974	27.5857	37.3411	92.6095	11.9563	-1.74724	82.0968	-5.46752
CDKL1	25.5724	4.87611	11.1241	19.1811	14.4483	-1.97588	133.537	-6.15401
FRMD6	76.625	87.6096	46.125	249.819	30.5	-1.51173	755.983	-10.9892
PLEKHO2	52.9244	3510.24	67.4706	1103.78	-14.5462	1.66912	312.519	-7.5363
LOC112448457	60.625	3.04848	29.375	12.0601	31.25	-1.98408	799.255	-11.7287
LOC104973153	79.3798	9.57843	63.3022	36.4018	16.0776	-1.92615	173.189	-6.38588
MYZAP	75.4377	20.6744	64.3489	117.448	11.0888	-2.5061	70.3911	-6.65667
SHF	67.4002	21.1654	44.2316	92.9186	23.1686	-2.13426	409.171	-8.56819
L3HYPDH	76.1088	4.80585	54.3241	9.8228	21.7847	-1.03134	352.192	-7.15882
RDH12	88.5257	2.28049	74.0219	9.08247	14.5038	-1.99374	134.873	-6.18968
SUSD6	62.3402	3942.37	50.3114	1372.39	12.0288	1.52238	83.5841	-6.3888
LOC512541	53.0536	13.4355	63.7448	6.09297	-10.6912	1.14083	190.163	-5.9746
PGF	79.7684	1.94856	53.8089	8.52565	25.9596	-2.1294	529.303	-9.56665
BATF	20.2972	44.446	44.4866	20.8076	-24.1894	1.09494	742.915	-10.8076
LOC101904357	27.375	65.682	11.975	32.7838	15.4	1.00252	154.103	-6.35216
DIO2	73.7114	41.3398	56.8184	1081.18	16.893	-4.70893	212.794	-14.0636
LOC101905198	68.7737	3.68155	32.1579	36.4186	36.6159	-3.30629	1137.42	-16.6297
LONRF2	82.9833	22.9784	60.7417	92.713	22.2417	-2.01249	372.242	-8.10456
XDH	54.8757	5171.67	42.8588	35778.7	12.0169	-2.7904	87.619	-7.36882
EML4	72.9623	1474.21	53.9138	704.971	19.0485	1.06431	257.757	-7.56583
HAAO	24.4955	34.7168	48.2819	13.127	-23.7864	1.4031	721.99	-10.7967
LOC100300483	72.6342	23.6628	85.757	2.67566	-13.1228	3.14465	272.002	-10.1306
LOC112448791	37.6246	121.785	50.5549	17.5694	-12.9303	2.7932	263.632	-9.18357
LOC101904757	81.7083	3.00565	65.0583	7.73461	16.65	-1.36365	186.753	-5.89704
MXD1	52.375	6807.02	27.625	2375.24	24.75	1.51895	474.124	-10.7415
LOC101905499	77.6591	651.703	64.2179	209.976	13.4412	1.63399	111.358	-6.93748
LOC101905151	36.7565	26.5128	24.1082	215.707	12.6482	-3.02431	100.648	-8.00097
FNDC4	38	14.9622	19.6032	56.2333	18.3968	-1.9101	238.99	-6.88538
KRTCAP3	77.9821	14.4517	21.3185	121.453	56.6637	-3.07109	2884.19	-31.3919
LOC104973427	88.2722	4.76452	65.5528	44.555	22.7194	-3.22518	396.828	-10.5105
LOC112448814	61.4167	3.9039	45.3833	12.7681	16.0333	-1.70956	171.311	-6.1029
RAD51AP2	78.0208	8.44338	88.5208	47.1537	-10.5	-2.48148	188.78	-9.15867
LOC112448823	47.5069	27.5597	66.1263	7.39827	-18.6194	1.8973	473.242	-9.16227
GRHL1	31.332	51.3251	15.6181	301.623	15.7139	-2.55501	166.478	-7.37314
LOC101905845	55.875	6.30027	16.125	14.429	39.75	-1.19548	1348.81	-16.3173
LOC107132958	49.656	3.74506	65.1607	8.02819	-15.5047	-1.10009	344.789	-8.10869
KYAT1	24.5	69.2381	7	34.4876	17.5	1.00549	210.436	-6.96739
SH3GLB2	55.5261	181.692	34.4027	435.658	21.1234	-1.2617	328.298	-7.04873
LOC101905017	93	2.88964	71.25	10.2141	21.75	-1.8216	352.924	-7.72077
LOC104975788	47.0742	28.7821	17.0923	133.219	29.9818	-2.21056	730.197	-11.3786
PAEP	77.4978	11621.5	51.8161	544900	25.6817	-5.55113	541.957	-19.5881
CARD9	21.7445	138.389	32.9362	50.832	-11.1918	1.44492	205.032	-6.39466
ABO	74.3269	57.8098	59.7118	154.434	14.615	-1.4176	135.633	-5.51964
PTGDS	31.5994	11.3307	16.3295	47.2519	15.2699	-2.06014	153.276	-6.42425
TMEM210	72.7202	3.47505	30.9956	14.7137	41.7246	-2.08205	1500.34	-18.0289
RNF208	4.41401	28.965	16.8125	63.7202	-12.3985	-1.13744	239.309	-7.05825
CYSRT1	77.9143	5.31986	54.7321	11.5346	23.1821	-1.11651	406.696	-7.67802
NOXA1	79.2175	20.0086	59.636	42.6194	19.5815	-1.09089	274.555	-6.48869
LOC101903713	85.6875	8.56267	53.9583	4.23441	31.7292	1.0159	824.464	-13.3696
CAB39L	69.012	234.093	55.1469	691.621	13.8651	-1.5629	119.225	-5.53058
ARL11	12.6538	430.811	52.378	167.458	-39.7241	1.36325	1830.95	-20.8049
LOC107132980	83.8381	6.84293	66.4639	91.2108	17.3741	-3.73652	218.42	-10.6685
SPATA13	74.5657	405.706	58.4634	1248.27	16.1023	-1.62142	172.84	-6.01893
LOC104973586	65.3125	2.91821	84.9167	7.55607	-19.6042	-1.37255	514.229	-10.3098
LOC101905905	79.1455	2.57288	67.6161	8.83405	11.5295	-1.77969	74.7714	-5.45832
LOC107133025	78.9924	1.6913	63.8401	18.8197	15.1523	-3.47604	157.85	-9.53566
GATA3	17.9768	171.108	31.6164	1038.17	-13.6396	-2.60106	284.226	-10.6136
NEBL	21.3739	99.5207	8.61887	1824.65	12.755	-4.19648	110.844	-11.6428
LOC104973739	35.6188	7.67284	17.2301	16.5571	18.3887	-1.10962	236.55	-6.16247
AKR1C4	88.3194	44.2265	74.4167	164.571	13.9028	-1.89573	121.099	-5.94926
LOC104973799	75.25	17.1146	43.875	7.39218	31.375	1.21115	804.758	-13.5554
LOC112449300	59.5522	201.977	31.5201	73.4573	28.0321	1.45922	627.215	-12.237
LOC112449306	74.0343	102.974	84.6583	16.9541	-10.624	2.60257	194.208	-8.25968
LOC104973826	76.1448	437.621	63.8192	171.155	12.3256	1.35438	88.4778	-6.15372
SIRPB1	87.1599	971.863	74.8037	371.558	12.3562	1.38717	89.1474	-6.21716
KCNQ2	71.9398	2.09222	61.4742	7.83892	10.4655	-1.90562	58.2654	-5.52538
LOC100847256	74.6738	20.204	64.4188	6.30331	10.255	1.68046	55.3901	-6.32835
RBBP8NL	83.347	8.76684	68.053	41.4622	15.294	-2.24167	154.596	-6.7208
LOC104973848	77.7659	34.6538	57.1562	13.2442	20.6097	1.38765	311.069	-8.7122
SLA2	77.5629	191.362	62.8931	682.477	14.6698	-1.83447	138.141	-5.99565
LBP	81.1232	21.2835	66.5763	146.63	14.547	-2.78437	139.418	-7.6687
LOC101907320	71.6557	3.85159	56.8315	9.67618	14.8241	-1.32898	140.299	-5.48249
OCSTAMP	60.8993	746.264	72.606	131.518	-11.7067	2.50443	224.436	-8.25726
LOC112449340	79.3	8.89341	57.7083	17.84	21.5917	-1.0043	344.945	-7.0851
LOC107133088	8.49242	372.831	22.2366	121.824	-13.7442	1.61372	284.758	-7.24074
LOC112449349	90.8018	105.35	74.0686	45.9291	16.7332	1.1977	189.324	-7.03987
PARD6B	54.2153	63.9764	39.1496	149.673	15.0657	-1.2262	145.818	-5.45111
LOC112449354	70.2293	2.45929	33.8278	15.5921	36.4014	-2.6645	1119.42	-15.335
CYP24A1	34.3815	6.3389	46.8708	14.6563	-12.4894	-1.20922	242.271	-7.19094
SCX	66.3571	21.6394	87.0938	128.875	-20.7366	-2.57424	571.198	-13.7904
LOC101903326	36.152	14.7565	17.9968	32.493	18.1552	-1.13878	229.494	-6.11565
EEF1D	40.2887	352.802	25.3675	945.115	14.9212	-1.42163	142.826	-5.58175
ARC	44.9583	102.179	19.125	946.47	25.8333	-3.21146	529.006	-11.4872
LOC104973986	50.9694	21.5202	68.25	7.33277	-17.2806	1.55326	415.757	-8.26721
LOC112449616	73.3295	17.3721	58.3774	8.44034	14.9521	1.0414	143.321	-6.28977
LOC107133109	92.3125	47.9653	59.5208	11.3853	32.7917	2.07482	890.133	-16.6163
LOC112449619	69.7042	11.3766	47.6495	5.65921	22.0548	1.0074	362.919	-8.58812
DCSTAMP	71.9625	925.316	85.9973	282.832	-14.0348	1.71	294.942	-7.44422
LOC100196897	33.6625	3.41504	50.4929	8.34472	-16.8304	-1.28896	396.108	-8.93345
CASP1	3.72727	149.15	18.7107	40.9617	-14.9835	1.86442	328.833	-7.92823
LOC112441605	59.9375	2238.52	43.0625	340.334	16.875	2.71752	199.609	-10.767
CRYAB	75.7582	265.918	34.5409	776.772	41.2173	-1.54651	1459.55	-17.3802
NXPE4	8.21563	20.9623	22.8708	225.387	-14.6552	-3.42654	323.877	-13.7298
LOC112441613	73.6577	24.0259	60.6324	10.3477	13.0253	1.21528	101.566	-6.08169
CD3D	87.1465	193.798	70.2939	444.057	16.8527	-1.19619	191.93	-5.8232
CD3G	87.2351	152.048	68.1244	429.24	19.1106	-1.49726	260.135	-6.62556
TTC36	82.4441	1.66715	51.9747	13.4206	30.4694	-3.00899	760.65	-12.9092
LOC112441619	68.4649	1.90395	53.2743	6.51194	15.1906	-1.77409	150.326	-6.01359
ARFIP2	28.4973	101.233	16.1075	350.395	12.3899	-1.79131	90.1605	-5.58272
LOC112441493	41.625	54.6834	25.75	154.086	15.875	-1.49456	166.593	-5.84241
OR51E1	41.625	2.17966	25.75	5.92267	15.875	-1.44215	166.454	-5.79364
FOLR3	63.6583	9.11411	38.9052	313.05	24.7531	-5.10215	496.11	-17.342
PHOX2A	39.5701	2.60623	52.9545	6.68198	-13.3844	-1.35831	271.209	-7.72728
RELT	45.1384	277.873	55.7891	130.562	-10.6508	1.08969	188.926	-5.92246
PLEKHB1	75.2191	7.56609	50.9837	55.2738	24.2354	-2.86898	456.725	-10.1839
MUC15	80.7138	149.155	52.7203	4534.09	27.9935	-4.92593	645.617	-17.6425
ELF5	66.0948	512.846	33.6268	14921.3	32.468	-4.86271	888.356	-19.1546
EHF	72.5142	518.188	35.9677	6403.69	36.5465	-3.62736	1134.9	-17.3276
LOC112441652	78.125	4.04556	34.8125	16.9189	43.3125	-2.06422	1625.65	-19.1398
SPI1	45.9501	3538.13	67.8189	1620.06	-21.8687	1.12694	622.005	-9.73632
MS4A3	66.1749	1.65617	82.2214	6.03514	-16.0465	-1.86554	367.231	-9.72428
LOC613282	76.6443	1.20495	51.2544	10.9497	25.39	-3.18386	508.821	-11.2672
PRELP	68.4387	2.51309	52.2171	23.7472	16.2216	-3.24022	183.382	-9.04751
SOX13	68.9794	44.1809	54.8145	230.809	14.1649	-2.38521	128.82	-6.79027
NUAK2	39.9449	60.1584	22.7958	206.192	17.1492	-1.77715	201.772	-6.4246
CDK18	68.046	35.2403	52.6226	126.052	15.4234	-1.83873	156.253	-6.1403
MFSD4A	69.7182	44.2956	52.096	932.944	17.6222	-4.39656	230.776	-12.9599
PIGR	73.4008	241.43	53.8652	5825.89	19.5356	-4.5928	291.951	-14.0462
FCAMR	51.2401	6.60783	37.4975	80.0958	13.7426	-3.59948	126.524	-9.72647
LOC515150	82.8123	28.2107	69.7556	12.704	13.0567	1.15095	102.025	-5.98825
2023-03-01	41.1765	109.87	23.3382	2682.82	17.8383	-4.60988	238.984	-13.811
HLX	51.3393	291.049	66.3514	123.901	-15.0121	1.23207	327.731	-7.21743
HHIPL2	80.3904	42.1989	59.4597	786.375	20.9307	-4.21994	336.746	-12.9781
LOC112441819	79.9605	5.33904	46.8748	32.9398	33.0857	-2.62518	908.974	-13.4761
LOC104974401	23	77.7651	45.25	27.4416	-22.25	1.50276	642.238	-10.174
XCL2	85.8917	9.76856	69.8313	199.998	16.0604	-4.3557	187.316	-12.5759
XCL1	85.158	2.75167	71.1458	24.0407	14.0122	-3.1271	129.325	-8.42371
F5	71.7624	950.906	82.2528	419.344	-10.4904	1.18117	184.795	-5.96474
SELL	30.4375	2890.28	68.7634	930.665	-38.3259	1.63487	1714.21	-19.8474
CASZ1	53.4674	183.921	37.1385	647.781	16.3289	-1.81642	179.427	-6.29361
ERRFI1	53.8036	157.923	32.9242	328.661	20.8794	-1.05738	319.118	-6.87144
TNFRSF9	84.7946	24.7851	71.9278	241.367	12.8669	-3.28369	106.46	-8.71201
KLHL21	61.8893	311.892	31.6118	650.719	30.2775	-1.06099	742.781	-10.7215
ARHGEF16	66.8152	30.1176	52.3931	236.653	14.4221	-2.97409	137.598	-8.09442
TTLL10	80.0342	4.70651	62.369	16.213	17.6652	-1.78442	216.624	-6.55281
ISG15	30.4776	757.005	17.1003	222.238	13.3774	1.7682	110.529	-7.20035
PERM1	68.9484	4.50977	51.4483	10.6308	17.5001	-1.23713	210.325	-6.0071
NCF2	34.1129	1730.32	62.1291	729.269	-28.0162	1.24651	966.355	-12.8905
LOC101904548	74.125	16.6596	88.125	5.36562	-14	1.63454	293.482	-7.33753
IRF6	52.0282	133.99	32.2326	575.247	19.7956	-2.10206	284.628	-7.50786
CAMK1G	59.25	65.621	30.25	25.8068	29	1.34641	676.187	-12.5055
LOC112441876	74.2111	9.86198	28.6306	3.88145	45.5806	1.34528	1811.99	-24.1547
ELF3	69.7582	77.8964	27.533	179.826	42.2252	-1.20698	1536.69	-18.0573
LAD1	74.5932	96.3327	57.837	198.935	16.7562	-1.0462	188.981	-5.71509
TNNT2	79.7307	4.33097	60.6279	19.0623	19.1028	-2.13796	262.032	-7.37913
FGG	76.625	11.4245	63.625	220.978	13	-4.27371	116.296	-11.9472
LOC101907174	72.256	6.67311	59.4186	41.8115	12.8375	-2.64747	102.289	-7.13828
LOC104974562	78.8781	47.0433	60.1205	22.4507	18.7575	1.06723	248.533	-7.47164
AACS	74.1572	184.088	61.6381	558.789	12.5191	-1.60191	92.0052	-5.36435
RILPL2	57.1161	530.348	71.3557	188.914	-14.2396	1.48921	301.209	-7.23469
TMEM120B	74.8225	175.362	56.7115	2333.23	18.111	-3.73392	240.07	-10.7958
SDSL	78	37.6341	45	12.1596	33	1.62994	900.799	-15.5163
RASAL1	68.2724	44.1577	47.2374	638.74	21.0351	-3.85449	337.644	-11.8034
OAS1Y	18.2139	539.246	30.6722	242.784	-12.4583	1.15127	241.839	-6.41852
BICDL1	77.4195	43.6601	62.3378	495.23	15.0817	-3.50371	156.331	-9.60644
PLA2G3	74.6324	2.1032	41.3294	9.52277	33.3029	-2.1788	920.054	-12.9845
SLC5A1	74.5634	19.012	52.4824	148.495	22.081	-2.96543	370.571	-9.71964
LOC504730	91	1.49405	79.25	5.21006	11.75	-1.80207	78.6387	-5.51527
GGT5	15.7248	484.396	49.7787	152.786	-34.0539	1.66467	1379.15	-16.8446
GGT1	59.8596	29.3169	44.0857	465.778	15.774	-3.98984	176.988	-11.2362
LOC112442080	51.69	25.8221	23.9837	8.26596	27.7062	1.64335	611.657	-12.4956
LOC112442254	84.9627	163.494	71.7709	65.0363	13.1918	1.32992	105.245	-6.31024
ATP2C2	75.1464	74.2629	59.5957	964.381	15.5507	-3.69889	169.197	-10.2612
LOC112442262	81.4051	44.8689	65.3426	19.8173	16.0625	1.17895	171.355	-6.81083
LOC112442264	61.017	4.38698	46.0425	13.9505	14.9745	-1.66902	144.789	-5.84696
PABPN1L	55.7209	2.38133	32.2121	7.35813	23.5088	-1.62757	421.221	-8.1161
SLC22A31	67.2978	2.9733	42.1006	24.4169	25.1972	-3.03775	499.374	-10.8697
NOD2	36.6964	791.76	23.158	306.458	13.5384	1.36937	112.521	-6.46224
ELMO3	50.0833	58.1227	29.702	154.485	20.3813	-1.4103	302.366	-6.91864
PARD6A	57.188	3.14289	41.8735	7.25623	15.3146	-1.20713	151.824	-5.48858
LOC100847995	45.8394	2.9733	32.0546	10.3501	13.7848	-1.79951	118.221	-5.79987
RHPN2	51.0952	58.0873	38.3689	470.818	12.7263	-3.01887	102.123	-7.9955
SCN1B	42.3824	13.4747	29.508	85.0277	12.8744	-2.65768	103.065	-7.16479
HPN	77.237	14.0476	26.6542	184.369	50.5828	-3.7142	2273.18	-27.1276
ETV2	31.375	5.02027	52.0417	11.743	-20.6667	-1.22596	563.135	-10.56
LOC101904550	57.4333	2.74839	33.2222	9.34861	24.2111	-1.76616	450.897	-8.49678
TYROBP	30.9893	2041.36	53.3021	900.158	-22.3128	1.18128	644.463	-9.96598
SYNE4	87.5982	2.80968	65.2798	15.9131	22.3185	-2.50174	377.267	-8.87105
SPINT2	61.8209	259.846	43.0639	1144.6	18.757	-2.13911	251.047	-7.29403
LGALS7	72.0625	3.35932	39.1458	7.08168	32.9167	-1.07592	893.547	-12.1099
PAK4	71.7931	133.753	48.2079	302.069	23.5852	-1.17531	423.214	-7.84902
GMFG	7.07292	748.645	24.9535	363.837	-17.8806	1.04099	439.027	-8.06097
BCKDHA	78.6585	164.713	63.4091	440.61	15.2494	-1.41955	150.727	-5.64448
LOC100848419	45.8574	244.547	63.9343	103.928	-18.0769	1.23452	447.774	-8.26059
CNFN	66.7253	2.85401	51.6361	28.7549	15.0892	-3.33275	155.392	-9.12099
LOC112441502	66.8583	554.058	43.0833	142.108	23.775	1.96305	434.41	-11.3654
CXCL17	85.9044	2.93794	74.456	13.7101	11.4484	-2.22236	75.0477	-6.14424
CD177	32.9261	13.4671	82.3177	5.97174	-49.3915	1.17321	2750.69	-29.3006
CEACAM19	90.525	9.61656	79.5278	63.2229	10.9972	-2.71685	69.9655	-7.10722
BCL3	58.8351	1271.58	34.3314	441.274	24.5037	1.52688	463.515	-10.645
LOC100138951	11.775	134.631	55.7	34.2458	-43.925	1.97501	2210.1	-24.5416
SIGLEC5	5	155.058	17.5	40.2961	-12.5	1.9441	245.811	-7.38632
LOC107131224	10.8	149.734	39.9208	68.1828	-29.1208	1.13493	1035.89	-13.4776
LOC112442215	22.25	215.853	57.8833	32.3709	-35.6333	2.73728	1503.84	-19.2031
LOC789748	3.8	32.3912	19.275	4.43225	-15.475	2.86949	351.835	-10.0032
LOC614923	57.9167	17.374	44.4167	5.82061	13.5	1.57768	112.388	-6.84028
LOC506868	44.2625	15.786	61.808	7.64527	-17.5455	1.04601	425.134	-7.94069
LOC617141	78.3106	15.4745	62.4391	6.24822	15.8715	1.30838	166.774	-6.97649
SSC5D	51.0886	18.2803	25.9928	37.3568	25.0958	-1.03108	487.293	-8.38075
LOC112442382	71.2214	6.72848	30.625	14.7585	40.5964	-1.1332	1411.54	-16.9026
TMEM150B	12.3038	154.954	59.8735	54.3049	-47.5697	1.51269	2563.98	-27.5655
NLRP2	82.375	19.4061	61.8917	4.3704	20.4833	2.15067	309.558	-10.4508
LOC100336589	29.4167	761.097	65.3333	206.423	-35.9167	1.88247	1521.64	-18.2866
KIR2DL5A	85.1875	9.41881	53.375	124.303	31.8125	-3.72218	840.735	-15.1909
KIR3DS1	61.7222	9.70962	47.25	28.7658	14.4722	-1.56687	132.75	-5.64118
LOC614781	77.4719	7.39649	66.6129	91.2067	10.859	-3.62423	73.2816	-9.56692
KIR3DL2	68.826	3.50298	57.692	20.3237	11.134	-2.53651	71.2652	-6.72412
KIR2DS1	80.3958	25.0505	60.7917	122.779	19.6042	-2.29315	279.034	-7.74997
LOC407171	11.7708	2369.49	56.6875	628.461	-44.9167	1.91468	2303.98	-25.3501
LOC112441494	69.1583	820.514	81.4111	381.225	-12.2528	1.10588	235.395	-6.32822
LOC107131323	81.0985	4004.63	70.5326	839.127	10.5659	2.25471	62.396	-7.68493
CUEDC1	64.3149	77.8702	50.9654	441.993	13.3495	-2.50488	111.892	-6.90582
LPO	75.75	118.477	55.6042	3297.35	20.1458	-4.79862	314.332	-14.9803
RNF43	61.7235	25.3127	32.7121	74.1269	29.0114	-1.55014	676.547	-10.3022
DHRS11	54.8688	99.5191	36.574	425.779	18.2947	-2.09706	236.561	-7.11873
LOC112442606	75.4065	1.16212	46.6136	8.49165	28.7929	-2.86929	670.702	-11.9034
LOC100296618	62.5065	2.21921	31.9612	7.95367	30.5454	-1.84157	759.491	-11.2502
LOC508666	54.7513	3745.52	69.7819	1458.96	-15.0306	1.36022	328.766	-7.33747
CCL2	92.1538	15533.3	81.4167	3783.93	10.7372	2.03741	64.0095	-7.19224
EVI2B	30.9954	4736.57	64.1545	2008.95	-33.1591	1.2374	1312.2	-16.0272
NOS2	55.0427	5433.44	78.2684	1122.22	-23.2257	2.27551	695.677	-11.5725
SLC46A1	56.8141	117.239	39.9923	58.324	16.8218	1.00729	191.284	-6.76348
SLC13A2	82.5656	2.47446	63.5733	11.943	18.9922	-2.27098	259.04	-7.55839
LOC112442623	5.7754	31.0515	29.6678	14.4008	-23.8924	1.10852	726.866	-10.6687
SLC13A5	7.71708	2032.05	20.9175	626.043	-13.2004	1.6986	267.104	-7.20372
ZNF594	81.25	2.36045	70.875	8.21312	10.375	-1.79887	56.5635	-5.36144
GLTPD2	88.8125	15.0495	71.6875	64.6146	17.125	-2.10214	202.259	-6.85888
ALOX12E	42.7708	13.6976	14.0417	35.7112	28.7292	-1.38245	661.524	-10.077
CLDN7	59.5262	157.08	24.3759	407.322	35.1502	-1.37467	1032.65	-13.4351
TMEM102	61.95	7.3394	46.334	41.5879	15.616	-2.50243	163.755	-7.25243
SLC35G6	81.1417	3.79979	63.6042	9.4699	17.5375	-1.31743	211.589	-6.07249
CD68	55.875	15254.6	40.5312	7610.56	15.3438	1.00316	152.717	-6.33792
SLC25A35	79.7167	27.8872	64.1469	94.5281	15.5698	-1.76114	159.644	-6.07076
LOC112442638	68.0323	3.19342	47.2835	10.55	20.7488	-1.72407	316.143	-7.30938
PRR15L	81.5272	16.7144	60.9738	46.2008	20.5533	-1.46683	308.508	-7.01401
GRB7	45.7083	59.9086	21.1667	125.837	24.5417	-1.07072	463.228	-8.17273
GSDMB	85.5636	31.9223	68.2396	77.7343	17.3239	-1.28399	205.364	-5.99583
RAPGEFL1	68.4413	23.2189	40.9143	67.7714	27.5269	-1.54538	601.63	-9.6342
TNS4	80.5238	78.0236	68.1132	36.3163	12.4106	1.10329	89.3763	-5.77286
KRT15	78.7576	58.2946	61.8382	201.962	16.9194	-1.79265	195.39	-6.39171
KRT19	29.9112	435.41	10.9243	3790	18.9869	-3.12175	263.218	-9.28922
HSD17B1	94.4583	26.0335	81.5625	8.974	12.8958	1.53655	99.9728	-6.61366
FMNL1	36.9192	2921.87	50.9589	1292.02	-14.0398	1.17727	293.424	-6.87939
CYB561	59.5117	43.447	41.552	161.102	17.9597	-1.89065	225.686	-6.75405
LOC112442683	72.25	1.62432	32	15.4962	40.25	-3.25401	1394.35	-18.6872
CD79B	26.9131	16.9682	53.2613	7.55181	-26.3481	1.16794	865.32	-11.9433
ZNF750	66.778	50.0208	41.9369	181.952	24.8411	-1.86296	478.296	-8.82799
LOC112442688	66.4806	4.61808	38	16.5511	28.4806	-1.84156	650.162	-10.2927
LOC112442694	79.3281	3.2106	56.2971	9.85273	23.0311	-1.61768	401.861	-7.94058
SLC25A10	27.6355	688.178	16.0097	328.608	11.6258	1.06641	75.1919	-5.55682
LOC101907247	65.7369	3.84062	51.6486	26.3135	14.0883	-2.77639	129.03	-7.58465
LOC112442700	93.6563	12.4424	81.5313	42.8518	12.125	-1.78409	85.2532	-5.53805
LOC112442701	50.269	137.149	61.4854	35.6832	-11.2164	1.94243	207.56	-7.08908
LOC112442703	78.2349	258.766	52.7989	76.2269	25.436	1.76328	505.254	-11.6409
LOC112442705	12.6341	42.4893	55.7113	18.0427	-43.0772	1.23569	2128.6	-23.5266
LOC100196898	53.5331	3.93725	33.4688	10.0056	20.0643	-1.34555	291.31	-6.77768
LOC112442733	76.2186	14.7825	57.6401	31.6324	18.5785	-1.09751	242.39	-6.20789
KCNJ16	77.1684	60.1581	63.4808	23.6254	13.6876	1.34842	115.612	-6.46223
LOC112442738	86.0585	3.47683	58.8609	12.1492	27.1975	-1.80502	586.401	-9.70414
LOC107131549	69.5181	7.83582	49.8023	28.6402	19.7158	-1.86989	281.102	-7.17863
LOC112442742	85.6156	2.17018	63.0907	25.6776	22.5249	-3.56462	391.419	-11.3415
FOXI1	73.3313	2.61571	54.914	14.4671	18.4173	-2.4675	241.903	-7.75946
GAPT	43.2249	429.054	70.3786	134.595	-27.1537	1.67254	914.892	-12.7175
LOC101908144	55.1319	268.152	71.8405	53.9374	-16.7086	2.31369	395.996	-9.18635
CCL28	54.8045	8.99552	44.4011	88.134	10.4035	-3.29242	64.1634	-8.54393
DAB2	60.1097	904.609	40.1155	241.486	19.9942	1.90535	291.669	-9.62438
LOC104975274	70.5208	2.54672	32.5833	23.177	37.9375	-3.18598	1227.17	-17.1411
LOC107131571	87.5061	2.34748	76.4366	25.9117	11.0695	-3.46442	75.5299	-9.08645
LOC112443018	72.4345	6.47978	29.1369	30.4877	43.2976	-2.23421	1625.13	-19.2696
LOC101906441	79.9208	12.4765	61.6294	5.30168	18.2915	1.23469	234.531	-7.59798
LOC101908149	54.2286	7.11072	77.75	17.1486	-23.5214	-1.27002	706.731	-12.1115
LOC112443203	76.375	1.62432	47.25	6.66687	29.125	-2.03717	684.072	-10.7818
LOC107131590	83.125	232.93	48.6667	37.657	34.4583	2.62891	994.849	-19.5304
LOC112443195	58.3333	19.2054	79.5	6.80714	-21.1667	1.49639	588.598	-9.70021
LOC104975324	91.5	60.5651	79.25	8.66994	12.25	2.80439	93.5207	-9.6364
LOC112443130	37.7977	152.71	24.9167	65.2206	12.881	1.2274	98.7393	-6.06799
MFGE8	82.6085	692.383	60.1287	12802.5	22.4798	-4.20871	394.485	-13.3218
FES	10.3519	761.274	31.8578	304.197	-21.5059	1.32341	604.598	-9.70218
SLC28A1	79.0179	17.0578	46.5382	45.3967	32.4797	-1.41215	868.368	-11.955
LOC100848238	88.5775	3.29803	78.5508	135.514	10.0267	-5.36069	76.0679	-16.5264
LOC100847412	89.5267	1.48635	78.3368	8.63183	11.1899	-2.53789	72.1793	-6.73205
SNX33	84.9679	38.9345	67.2282	120.238	17.7397	-1.62677	218.315	-6.39568
LMAN1L	80.4392	4.78739	58.1098	18.4711	22.3294	-1.94796	375.382	-8.05207
LOC540321	91.4359	1.16212	76.1051	8.14935	15.3308	-2.80993	158.21	-7.84816
LOC104975377	71	14.7972	41.5	6.37785	29.5	1.21419	702.022	-12.4991
SERPINA1	77.9782	20.1892	67.6355	96.1459	10.3426	-2.25164	57.7956	-6.09431
CLMN	75.4003	264.75	61.8717	5074.88	13.5285	-4.26067	126.997	-11.9422
LOC107131652	69.5461	17.3009	54.9468	45.0502	14.5994	-1.38068	135.178	-5.48352
VILL	37.5257	4.24131	15.2652	10.4118	22.2606	-1.29563	370.801	-7.44202
VIPR1	72.3168	9.86762	57.9336	166.18	14.3832	-4.0739	144.155	-11.3531
ACKR2	82.2321	15.1192	50.2871	61.0394	31.9451	-2.01336	839.063	-12.1054
FAM198A	80.4784	8.06142	70.054	40.8181	10.4244	-2.3401	59.3783	-6.26792
LMOD3	74.8333	4.36802	89.7667	9.03602	-14.9333	-1.04871	323.828	-7.81971
ACOX2	68.6694	7.55069	37.0357	82.6841	31.6337	-3.45293	828.619	-14.4235
LOC104975561	28.0599	62.6518	61.8274	30.8358	-33.7675	1.02275	1356.07	-16.3878
SMIM4	16.7562	35.3221	27.8701	82.3033	-11.1139	-1.22038	201.469	-6.77191
SLC38A3	50.9626	16.1187	37.966	193.454	12.9966	-3.58519	111.013	-9.60571
SEMA3F	82.965	52.2186	63.634	119.487	19.331	-1.19421	266.536	-6.46941
RTP3	85.4674	6.05449	71.1117	14.667	14.3556	-1.27649	129.354	-5.35091
CLEC3B	69.0057	2.71084	57.2005	8.73599	11.8052	-1.68823	79.2384	-5.3726
LOC112443431	89.7034	40.769	72.7198	9.13994	16.9836	2.15722	199.734	-9.18382
MAPK13	61.04	51.8311	18.9706	466.82	42.0694	-3.17098	1532.55	-19.7111
LOC107131716	88.8332	29.0172	73.1435	8.5762	15.6897	1.7585	163.651	-7.81529
KCNK5	73.0675	45.643	51.4314	235.649	21.6361	-2.36817	350.81	-8.43831
TREML2	15.2267	1538.95	40.5875	467.133	-25.3608	1.72004	810.015	-11.8413
TREM1	58.3554	1529.4	72.113	523.827	-13.7576	1.54581	284.974	-7.16274
LOC112443745	53.4326	9.69672	41.3888	38.83	12.0438	-2.0016	84.5465	-5.84285
EFHC1	44.4291	14.5253	31.7882	87.2772	12.6409	-2.58704	98.1762	-6.98611
BOLA-DQA2	30.375	572.825	10.75	255.525	19.625	1.16463	276.801	-7.93536
CFB	53.6333	363.511	33.875	167.404	19.7583	1.11867	281.124	-7.9044
C2	26.3625	1406.26	13.6667	465.506	12.6958	1.59499	96.2696	-6.67926
SLC44A4	72.7493	26.2742	59.857	11.5282	12.8923	1.18848	98.856	-6.00887
AIF1	41.8593	182.582	58.8245	79.9878	-16.9652	1.19069	401.942	-7.82879
LST1	20.3914	238.13	38.0833	115.518	-17.6919	1.04363	431.176	-7.99286
MUC21	86.8103	1.66715	70.5013	7.84945	16.3091	-2.23521	180.478	-6.9007
PPP1R18	33.7643	2512.92	46.1882	823.244	-12.4239	1.60997	242.17	-6.88963
BTN1A1	71.6553	333.504	60.0208	11572.4	11.6345	-5.11685	98.6358	-15.3858
LOC104975682	83.5999	11.7809	67.012	196.455	16.5879	-4.05968	198.924	-11.5923
DSP	39.262	750.553	20.826	1649.55	18.436	-1.13605	238.056	-6.18907
LOC101902551	66.9478	3.2064	28.6382	23.1321	38.3096	-2.85087	1251.35	-16.755
TUBB2A	23.8819	1447.58	12.3304	648.033	11.5514	1.1595	74.154	-5.67753
LOC100848495	13.5312	3.05745	50.25	8.54697	-36.7188	-1.48308	1582.48	-21.4672
LOC112444147	77.5576	17.8153	48.5294	92.2442	29.0283	-2.37235	680.417	-11.1669
SERPINB5	65.4314	33.7148	53.4622	302.477	11.9692	-3.16537	88.8916	-8.3034
LOC531296	69.1354	14.2806	53.7542	95.4893	15.3813	-2.74128	159.09	-7.70445
SOX8	75.0453	6.72734	46.7284	24.9271	28.3169	-1.88961	642.026	-10.2669
TBC1D24	58.1211	188.819	47.0453	684.205	11.0759	-1.85743	67.5354	-5.51584
PRSS27	77.6411	1.4099	60.0562	8.17475	17.5849	-2.53559	217.314	-7.70139
ZG16B	67.2542	2.17018	56.1167	42.1238	11.1375	-4.27875	82.7022	-11.8562
LOC100847890	75.875	194.561	30.5	439.49	45.375	-1.17561	1793.41	-20.4475
MMP25	29.1125	2326.13	47.0138	492.757	-17.9013	2.23898	444.163	-9.44138
LOC112444326	38.4641	161.367	53.7431	34.4974	-15.279	2.22578	341.154	-8.59801
LOC100139916	93.4301	2.04939	77.1848	69.3035	16.2452	-5.07966	198.79	-15.5512
LOC788915	79.8893	4.38078	43.9	13.3741	35.9893	-1.61019	1087.88	-14.0258
ZNF263	59.8434	146.139	47.666	65.9035	12.1774	1.14891	85.1755	-5.79088
LOC112444357	81.0985	11.1644	66.0039	1.74642	15.0946	2.67644	153.279	-10.053
TMC5	61.9556	11.8982	51.6918	218.522	10.2638	-4.19896	68.6607	-11.5264
GP2	73.1167	31.8521	51.7656	1127.67	21.351	-5.14581	360.373	-16.6871
ACSM5	72.2083	2.26532	50.7813	13.4654	21.427	-2.57147	344.022	-8.73198
IGSF6	53.4182	1352.27	76.8091	457.148	-23.391	1.56465	701.454	-10.7463
NUPR1	67.8472	275.488	36.2451	748.041	31.6021	-1.44113	817.54	-11.5078
C25H16orf54	51.9501	661.058	63.8009	217.019	-11.8508	1.60696	224.765	-6.74583
FBXL19	58.0029	219.398	32.1509	451.885	25.852	-1.04241	521.244	-8.69218
PRSS8	74.075	187.142	31.8475	453.036	42.2275	-1.27549	1537.02	-18.0572
LOC107131831	32.6806	1	18.5593	6.95194	14.1213	-2.79742	129.87	-7.63677
ITGAM	53.8617	5032.64	73.1408	1906.97	-19.2791	1.40003	500.474	-8.84995
ITGAX	55.4833	2750.08	72.8534	939.642	-17.3701	1.54929	419.39	-8.29391
NCF1	43.6935	2751.53	59.3989	542.458	-15.7055	2.34265	357.526	-8.9366
ELN	82.9739	24.316	68.1668	10.2841	14.8072	1.24149	140.402	-6.56678
LOC112444301	76.2165	3.77121	51.5045	13.9866	24.7119	-1.89095	472.776	-8.81021
CCL26	76.75	2.55442	33.0417	38.0919	43.7083	-3.89841	1668.11	-22.4053
LOC112444342	75.1817	3.27338	58.1527	9.23602	17.0291	-1.49649	197.558	-6.0995
LOC112444316	13.8958	18.083	63.25	5.65902	-49.3542	1.67601	2748.35	-29.2941
TRIM56	24.1893	1070.52	12.3566	511.421	11.8327	1.06573	78.7859	-5.59753
C25H7orf61	76.8184	3.28505	42.2409	13.5485	34.5775	-2.04415	998.294	-13.5333
PILRA	73.4417	1445.81	86.2543	567.202	-12.8126	1.34995	253.498	-6.69369
GAL3ST4	14.685	14.2598	25.1084	6.65211	-10.4234	1.10007	182.778	-5.87923
AZGP1	75.3961	37.8364	36.1632	653.229	39.2329	-4.10974	1325.74	-20.1328
LOC104975911	61.625	486.436	28.8333	140.59	32.7917	1.79076	888.954	-15.8085
BHLHA15	64.1992	35.5816	40.4162	572.384	23.783	-4.00778	445.259	-13.0219
LOC104975913	90.983	2.22819	77.5449	17.4716	13.4381	-2.97107	116.147	-7.95781
LOC101908535	23.1898	30.8816	34.557	11.2979	-11.3672	1.45069	210.074	-6.44197
LOC112444340	88.9238	3.36852	70.8	15.1942	18.1238	-2.17333	231.679	-7.19356
TMEM184A	77.4994	4.64501	55.3665	24.521	22.1328	-2.40027	369.676	-8.64099
MICALL2	59.0261	20.9609	35.1086	87.29	23.9174	-2.05812	439.582	-8.72283
GPER1	77.2735	2.67521	67.1991	9.81219	10.0744	-1.87492	52.501	-5.44391
AS3MT	47.2101	11.3054	20.8674	29.7117	26.3427	-1.39402	544.631	-9.03739
GSTO1	0.5	96.7234	18.4	37.2488	-17.9	1.37667	440.747	-8.31231
LOC101905041	22.2227	625.968	35.2383	299.203	-13.0156	1.06497	259.206	-6.50208
LOC112444470	50.8648	35.0201	37.4903	13.8649	13.3745	1.33675	109.007	-6.36561
LOC112444522	81.7336	2.39231	61.6209	6.3439	20.1127	-1.40697	293.114	-6.8364
TECTB	86.4397	9.10711	75.2861	119.74	11.1536	-3.71676	78.6296	-9.87976
PLEKHS1	81.7579	25.6403	64.0287	63.6494	17.7292	-1.31173	217.171	-6.11606
CPXM2	75.0842	2.93817	62.5595	15.5985	12.5246	-2.40842	95.116	-6.61122
LOC112444485	13.822	40.8467	58.7422	15.6062	-44.9202	1.3881	2302.43	-25.1408
LOC112444501	60.1836	50.8313	81.3354	18.4515	-21.1518	1.46198	587.768	-9.66302
DEFB7	35.1208	215.483	55.0833	63.8293	-19.9625	1.75528	532.667	-9.48469
DEFB4A	32.0122	521.386	51.3305	218.32	-19.3183	1.25591	501.804	-8.74941
ANKRD37	34.8489	128.422	11.4237	29.9492	23.4252	2.10031	420.622	-11.5737
DKK4	40.0193	18.1532	65.9724	3.64953	-25.953	2.31444	846.571	-12.904
MAP3K21	76.4924	49.599	64.0834	396.131	12.409	-2.99759	95.9539	-7.90891
SRGN	38.4969	30178.5	58.1862	13750.1	-19.6893	1.13408	518.204	-8.81552
HKDC1	81.7891	15.4813	69.4632	6.34174	12.3259	1.28758	88.2882	-6.04162
PCBD1	23.8627	48.66	12.6542	195.04	11.2085	-2.00296	70.2052	-5.74984
C28H10orf105	84.4752	19.4996	72.8734	7.41989	11.6018	1.39397	75.6795	-6.06654
LOC107131941	70.3975	996.139	57.5867	175.098	12.8108	2.50818	102.508	-8.89982
LOC112444740	40.125	51.8503	82.125	20.2927	-42	1.35339	2030.75	-22.6364
RASSF4	66.3942	700.079	44.4927	2498.75	21.9014	-1.83562	358.661	-7.78419
MED17	33.5744	303.292	16.9595	668.234	16.6149	-1.13965	185.301	-5.73238
LOC101905267	66.6699	39.3244	54.1606	17.3529	12.5093	1.18025	91.433	-5.91045
LOC101902145	52.5631	4.41021	38.3063	13.8377	14.2568	-1.64968	128.113	-5.69468
ADAMTS8	85.8988	4.91438	74.4085	16.9548	11.4903	-1.78661	74.1305	-5.46311
LOC112444895	77.2033	5.27005	65.999	38.4147	11.2043	-2.86577	74.0928	-7.47381
PAG11	89.075	10.5854	76.5313	2.40775	12.5437	2.13631	95.5278	-7.84222
PGA5	33.2417	84.2017	67.4653	32.3244	-34.2236	1.38123	1390.82	-16.7943
SCGB1D	76.7261	12.1205	43.6924	1772.51	33.0337	-7.1922	949.391	-30.7694
SCGB2A2	84.4	2.42416	64.9393	68.7664	19.4607	-4.82615	291.617	-14.9598
FERMT3	13.1425	1834.56	54.2244	876.464	-41.0818	1.06567	1948.11	-21.861
CCDC88B	10.2009	248.286	58.9479	81.1649	-48.747	1.61308	2684.87	-28.696
SPDYC	93.3705	4.15346	75.4911	10.9667	17.8795	-1.40075	221.825	-6.22214
LOC104976804	53.9464	31983.6	24.1177	9082.82	29.8287	1.81612	721.52	-14.0985
LOC104976281	71.9527	26594	39.4583	4241.05	32.4943	2.64861	875.4	-18.294
OVOL1	54.9828	28.8558	37.1037	137.163	17.8791	-2.24896	224.67	-7.25742
LOC789733	76.0405	3.0313	37.4636	6.67347	38.5769	-1.1385	1263.93	-15.5334
LOC508879	62.8002	52.7321	42.5074	625.727	20.2928	-3.56878	309.439	-10.7747
LOC112444924	58.3593	101.061	86.1259	31.3409	-27.7666	1.6891	952.339	-13.0625
LOC112444899	57.2839	1.55534	21.7673	7.63252	35.5166	-2.29493	1059.43	-14.3305
SHANK2	72.7832	130.449	59.3372	477.519	13.446	-1.87207	111.299	-5.84466
SLC22A18	55.889	123.74	71.9946	40.6403	-16.1056	1.60633	369.572	-7.93551
TSPAN32	21.5689	1555.7	57.8949	506.508	-36.326	1.61891	1552.71	-18.3781
H19	78.5833	59.7032	62.8542	8.80628	15.7292	2.7612	169.466	-10.5199
IFITM10	71.15	18.0945	24.5414	47.9087	46.6086	-1.40474	1899.9	-21.412
MUC5AC	87.762	138.284	76.6566	6.72244	11.1054	4.3625	85.3525	-15.3374
PKP3	73.4527	61.6012	43.6841	157.698	29.7686	-1.35614	715.945	-10.5552
IFITM1	31.2111	1441.79	54.3038	477.04	-23.0927	1.59568	685.886	-10.6385
IFITM3_1	21.5143	2594.11	7.34405	935.892	14.1702	1.47083	126.504	-6.80611
CCDC160	46.0319	8.29694	35.6322	61.1541	10.3997	-2.8818	61.6889	-7.45358
ZNF185	70.7026	26.2078	56.2542	133.601	14.4483	-2.34987	135.049	-6.76904
PLXNB3	65.5627	6.813	52.0909	20.6102	13.4717	-1.597	110.96	-5.50314
ERAS	74.1335	26.6719	64.0488	10.8967	10.0847	1.29143	51.6951	-5.60507
LOC100300091	69.4792	1.20495	41.2292	11.524	28.25	-3.2576	645.304	-12.5063
ARSE	69.4495	4.70132	40.127	20.9337	29.3224	-2.15469	694.871	-11.0081
LOC783508	55.3193	3.96432	36.3323	14.5522	18.987	-1.87609	257.347	-6.99191
LOC100847574	69.6667	23.0294	40.5	201.11	29.1667	-3.12643	691.564	-12.588
SERPINB4	49.625	936.373	70.6667	446.783	-21.0417	1.06751	581.341	-9.34289
LOC112445621	56.0206	6.70602	37.7763	26.8558	18.2444	-2.00171	234.664	-6.97047
LOC509374	65.7	2.77783	42.9792	7.10313	22.7208	-1.3545	388.845	-7.63539
LOC101910148	50	3.96432	61.7667	8.26397	-11.7667	-1.05976	220.051	-6.75198
LOC112445793	8.875	3.21779	24.5	8.00268	-15.625	-1.31441	349.721	-8.48844
LOC112445843	62	9.09891	45.2818	24.0024	16.7182	-1.39941	188.702	-5.9421

## Sheet: TableS10D_allDMEGs
Table S10D List of all identified differentially methylated (promoter, first exon and/or first Iintron) and expressed genes (DMEGs)
red: up-regulated gene expression and hypo-methylation; red: down-regulated expression and hyper-methylation	gene_ID	SCpositiveexpmean	controlexpmean	log2FC	SCpositivemethmean_pro	controlmethmean_pro	meth.diff_pro	var_pro	GMM_score_pro	SCpositivemethmean_FE	controlmethmean_FE	meth.diff_FE	var_FE	GMM_score_FE	SCpositivemethmean_FI	controlmethmean_FI	meth.diff_FI	var_FI	GMM_score_FI	Number of dMHB
1	A2M	1230.41	552.577	1.15489	NA	NA	NA	NA	NA	87.3183	76.3125	11.0058	102.755	-5.84315	NA	NA	NA	NA	NA	#N/A
2	AACS	184.088	558.789	-1.60191	NA	NA	NA	NA	NA	NA	NA	NA	NA	NA	74.1572	61.6381	12.5191	92.0052	-5.36435	#N/A
3	ABCA1	3405.48	1313.03	1.37496	11.3262	22.1943	-10.868	181.253	-6.52494	NA	NA	NA	NA	NA	NA	NA	NA	NA	NA	#N/A
4	ABCA13	47.3912	11.5814	2.03281	NA	NA	NA	NA	NA	NA	NA	NA	NA	NA	87.8765	70.8582	17.0183	200.147	-8.87674	#N/A
5	ABCC11	6.80927	27.6345	-2.0209	NA	NA	NA	NA	NA	70.25	32.8125	37.4375	1334.64	-12.2866	NA	NA	NA	NA	NA	#N/A
6	ABCG2	141.996	3797.55	-4.74114	NA	NA	NA	NA	NA	NA	NA	NA	NA	NA	64.5	86.9167	-22.4167	669.148	-23.6391	1
7	ABO	57.8098	154.434	-1.4176	73.452	54.3836	19.0683	275.837	-7.36815	73.125	30.5417	42.5833	1734.71	-14.1812	74.3269	59.7118	14.615	135.633	-5.51964	4
8	ACE2	3.98706	20.0932	-2.33331	55.2023	68.1215	-12.9193	242.791	-9.85559	73.0361	52.9536	20.0825	370.726	-7.65681	NA	NA	NA	NA	NA	#N/A
9	ACKR2	15.1192	61.0394	-2.01336	76.1132	64.4612	11.652	87.081	-5.96295	75.5474	36.2933	39.2541	1470.47	-13.0276	82.2321	50.2871	31.9451	839.063	-12.1054	#N/A
10	ACOD1	4707.19	1379.03	1.77122	NA	NA	NA	NA	NA	63.2917	39.6083	23.6833	520.353	-10.1045	NA	NA	NA	NA	NA	#N/A
11	ACOX2	7.55069	82.6841	-3.45293	NA	NA	NA	NA	NA	40.9938	22.8719	18.1219	305.706	-9.89931	68.6694	37.0357	31.6337	828.619	-14.4235	4
12	ACPP	2.63808	9.2104	-1.80378	82.2028	67.0049	15.1979	163.76	-6.48128	NA	NA	NA	NA	NA	NA	NA	NA	NA	NA	#N/A
13	ACSL5	1374.85	638.348	1.10686	NA	NA	NA	NA	NA	83.0625	47.6458	35.4167	1189.33	-13.1561	NA	NA	NA	NA	NA	4
14	ACSL6	2682.67	821.267	1.70775	24.0208	48.4746	-24.4538	730.412	-13.1451	NA	NA	NA	NA	NA	NA	NA	NA	NA	NA	3
15	ACSM1	1.36707	8.41937	-2.62263	36.4287	54.3478	-17.9192	423.412	-13.1864	65.0625	47.1458	17.9167	293.901	-7.84148	NA	NA	NA	NA	NA	#N/A
16	ACSM2B	2.58628	6.2227	-1.26667	73.6256	57.5309	16.0947	185.834	-6.22777	NA	NA	NA	NA	NA	NA	NA	NA	NA	NA	#N/A
17	ACSM5	2.26532	13.4654	-2.57147	71.2665	44.1132	27.1533	613.234	-12.5332	30.9583	14.0833	16.875	259.394	-7.59041	72.2083	50.7813	21.427	344.022	-8.73198	#N/A
18	ACTA2	155.745	42.7886	1.86389	51.7429	39.8942	11.8486	91.2875	-7.22798	NA	NA	NA	NA	NA	NA	NA	NA	NA	NA	2
19	ACVR2B	519.689	253.932	1.0332	58.9023	37.6772	21.2251	351.707	-9.36384	18.2329	7.85725	10.3757	90.1816	-5.57119	NA	NA	NA	NA	NA	1
20	ADA2	134.055	57.1817	1.2292	73.2002	84.6855	-11.4854	197.727	-6.56643	NA	NA	NA	NA	NA	NA	NA	NA	NA	NA	#N/A
21	ADAMTS8	4.91438	16.9548	-1.78661	NA	NA	NA	NA	NA	NA	NA	NA	NA	NA	85.8988	74.4085	11.4903	74.1305	-5.46311	1
22	ADCYAP1R1	41.8352	93.6011	-1.16181	NA	NA	NA	NA	NA	2.125	13.125	-11	143.901	-5.74747	NA	NA	NA	NA	NA	#N/A
23	ADGRF1	17.5964	350.915	-4.31777	NA	NA	NA	NA	NA	22.375	45	-22.625	573.313	-18.4526	NA	NA	NA	NA	NA	#N/A
24	ADGRG1	169.547	398.539	-1.23303	83.8851	69.5102	14.375	141.988	-5.70518	72.7927	32.9	39.8927	1517.49	-12.8981	NA	NA	NA	NA	NA	#N/A
25	ADGRL2	84.881	228.1	-1.42616	NA	NA	NA	NA	NA	48.3292	18.7	29.6292	823.968	-9.01738	NA	NA	NA	NA	NA	1
26	AEBP1	10.5548	21.6888	-1.03905	NA	NA	NA	NA	NA	NA	NA	NA	NA	NA	79.4699	61.5407	17.9292	222.524	-6.00614	#N/A
27	AFAP1L2	47.9633	267.402	-2.47901	NA	NA	NA	NA	NA	82.925	33.1979	49.7271	2384.36	-18.5445	NA	NA	NA	NA	NA	4
28	AFF3	155.488	603.998	-1.95774	NA	NA	NA	NA	NA	10.0096	20.3903	-10.3807	131.729	-6.97457	NA	NA	NA	NA	NA	#N/A
29	AGR2	4.0673	93.7626	-4.52687	80.5274	67.1665	13.3608	136.942	-12.9911	65.125	32.5938	32.5312	1016.38	-16.2963	80.8565	61.0625	19.794	299.963	-13.845	1
30	AGRP	1.98811	6.05266	-1.60617	75.7723	58.6557	17.1166	215.521	-6.84036	NA	NA	NA	NA	NA	NA	NA	NA	NA	NA	#N/A
31	AGT	2.11838	6.39908	-1.59491	NA	NA	NA	NA	NA	81.1973	63.4732	17.7241	283.372	-6.23788	NA	NA	NA	NA	NA	1
32	AIF1	182.582	79.9878	1.19069	NA	NA	NA	NA	NA	7	29.375	-22.375	545.978	-7.52516	41.8593	58.8245	-16.9652	401.942	-7.82879	#N/A
33	AKR1C4	44.2265	164.571	-1.89573	NA	NA	NA	NA	NA	70.75	44.875	25.875	624.172	-8.32286	88.3194	74.4167	13.9028	121.099	-5.94926	#N/A
34	ALDH1A1	96.3527	731.757	-2.92497	NA	NA	NA	NA	NA	NA	NA	NA	NA	NA	75.7576	60.5557	15.2019	155.684	-8.09279	#N/A
35	ALDH3B1	230.624	95.3859	1.27369	NA	NA	NA	NA	NA	55.1458	35.9246	19.2212	335.751	-7.7373	NA	NA	NA	NA	NA	1
36	ALOX12E	13.6976	35.7112	-1.38245	79.7223	63.06	16.6623	201.853	-6.49364	69.325	29.8375	39.4875	1486.45	-12.7487	42.7708	14.0417	28.7292	661.524	-10.077	#N/A
37	ALOX5AP	157.013	72.9046	1.1068	NA	NA	NA	NA	NA	9.75	41.9313	-32.1813	1099.44	-10.552	NA	NA	NA	NA	NA	2
38	AMOTL1	67.3424	299.77	-2.15427	NA	NA	NA	NA	NA	73.6667	61.0188	12.6479	140.804	-6.32955	NA	NA	NA	NA	NA	#N/A
39	AMZ1	3.68747	8.66176	-1.23203	NA	NA	NA	NA	NA	79.4327	45.2782	34.1546	1103.53	-10.5183	NA	NA	NA	NA	NA	#N/A
40	ANGPTL4	441.418	174.329	1.34033	45.6549	27.5251	18.1298	246.241	-8.44779	NA	NA	NA	NA	NA	NA	NA	NA	NA	NA	3
41	ANK3	96.7449	643.708	-2.73415	65.0221	30.5495	34.4727	1028.39	-17.5084	NA	NA	NA	NA	NA	NA	NA	NA	NA	NA	#N/A
42	ANKRD31	41.0915	18.9499	1.11665	NA	NA	NA	NA	NA	NA	NA	NA	NA	NA	70.875	31.5	39.375	1321.89	-18.636	#N/A
43	ANKRD33	39.7281	10.1248	1.97226	NA	NA	NA	NA	NA	NA	NA	NA	NA	NA	77.5625	57.4167	20.1458	297.111	-9.84996	#N/A
44	ANKRD37	128.422	29.9492	2.10031	NA	NA	NA	NA	NA	NA	NA	NA	NA	NA	34.8489	11.4237	23.4252	420.622	-11.5737	#N/A
45	ANKRD6	16.8568	72.7025	-2.10867	40.8196	30.6296	10.1901	62.848	-5.87925	NA	NA	NA	NA	NA	NA	NA	NA	NA	NA	#N/A
46	AOAH	303.362	133.733	1.18168	62.0125	82.7391	-20.7266	541.643	-10.5138	10.8073	47.6935	-36.8862	1433.56	-12.4773	NA	NA	NA	NA	NA	1
47	AOX2	58.2927	28.8077	1.01686	83.5206	56.1303	27.3903	620.462	-12.8999	NA	NA	NA	NA	NA	NA	NA	NA	NA	NA	1
48	AP1M2	58.0191	425.39	-2.87419	NA	NA	NA	NA	NA	NA	NA	NA	NA	NA	37.0913	26.3352	10.7561	67.021	-7.45964	#N/A
49	AQP5	1.98191	7.11152	-1.84327	NA	NA	NA	NA	NA	54.6235	33.0743	21.5492	427.086	-7.2394	55.9322	45.6567	10.2755	55.2626	-5.4155	#N/A
50	ARAP1	2277.58	1046.87	1.12142	57.6916	32.0061	25.6855	538.786	-12.0038	NA	NA	NA	NA	NA	NA	NA	NA	NA	NA	#N/A
51	ARC	102.179	946.47	-3.21146	NA	NA	NA	NA	NA	31.9522	21.6464	10.3058	96.8697	-8.55293	44.9583	19.125	25.8333	529.006	-11.4872	3
52	ARFIP2	101.233	350.395	-1.79131	NA	NA	NA	NA	NA	NA	NA	NA	NA	NA	28.4973	16.1075	12.3899	90.1605	-5.58272	1
53	ARHGAP28	108.159	499.103	-2.20618	65.8468	51.7825	14.0642	137.768	-6.76818	NA	NA	NA	NA	NA	NA	NA	NA	NA	NA	#N/A
54	ARHGEF16	30.1176	236.653	-2.97409	NA	NA	NA	NA	NA	NA	NA	NA	NA	NA	66.8152	52.3931	14.4221	137.598	-8.09442	#N/A
55	ARHGEF2	3460.35	1268.08	1.44827	73.189	57.5494	15.6396	174.975	-7.64615	NA	NA	NA	NA	NA	NA	NA	NA	NA	NA	1
56	ARHGEF38	17.8213	68.9664	-1.95229	NA	NA	NA	NA	NA	64.7445	22.1241	42.6204	1739.44	-14.4719	NA	NA	NA	NA	NA	#N/A
57	ARHGEF40	411.758	162.954	1.33733	NA	NA	NA	NA	NA	83.3583	65.6667	17.6917	282.39	-7.47447	73.225	57.5	15.725	163.121	-6.9859	#N/A
58	ARL11	430.811	167.458	1.36325	54.2349	69.0763	-14.8414	303.307	-7.88484	3.375	21.25	-17.875	356.768	-6.67547	12.6538	52.378	-39.7241	1830.95	-20.8049	1
59	ARL5C	11.2964	4.02382	1.48923	49.0909	76.8102	-27.7193	916.405	-15.142	NA	NA	NA	NA	NA	NA	NA	NA	NA	NA	#N/A
60	ARSE	4.70132	20.9337	-2.15469	NA	NA	NA	NA	NA	71.8125	44.625	27.1875	692.288	-8.99385	69.4495	40.127	29.3224	694.871	-11.0081	#N/A
61	ARSH	3.20112	10.0356	-1.64847	66.9789	53.9454	13.0334	113.023	-5.75782	NA	NA	NA	NA	NA	NA	NA	NA	NA	NA	#N/A
62	AS3MT	11.3054	29.7117	-1.39402	NA	NA	NA	NA	NA	53.8854	22.6042	31.2813	921.367	-9.54557	47.2101	20.8674	26.3427	544.631	-9.03739	#N/A
63	ASAP3	7.26308	80.985	-3.479	NA	NA	NA	NA	NA	NA	NA	NA	NA	NA	67.995	57.8175	10.1775	62.097	-9.08275	2
64	ASIC3	42.6704	101.197	-1.24587	NA	NA	NA	NA	NA	64.806	29.2149	35.5911	1201.02	-11.0796	53.6841	26.7024	26.9817	574.472	-9.2359	#N/A
65	ATP13A4	35.3704	431.213	-3.60779	86.3625	61.7972	24.5653	498.466	-13.4548	NA	NA	NA	NA	NA	77.2905	29.1461	48.1444	2046.51	-24.96	#N/A
66	ATP2C2	74.2629	964.381	-3.69889	67.6494	55.5528	12.0966	104.535	-9.92537	34.1309	16.9591	17.1718	275.671	-10.5186	75.1464	59.5957	15.5507	169.197	-10.2612	#N/A
67	ATP6V1B1	3.48981	13.7995	-1.9834	NA	NA	NA	NA	NA	62.2419	27.3938	34.8481	1152.26	-11.2522	NA	NA	NA	NA	NA	#N/A
68	ATP8B4	568.017	243.607	1.22138	83.029	66.7483	16.2807	191.55	-7.48918	94.5	81.125	13.375	156.181	-6.35122	NA	NA	NA	NA	NA	#N/A
69	AVPR2	5.79724	95.3487	-4.03978	45.2553	60.9677	-15.7124	347.144	-16.9131	73.971	56.6637	17.3072	282.621	-11.6532	NA	NA	NA	NA	NA	#N/A
70	AZGP1	37.8364	653.229	-4.10974	NA	NA	NA	NA	NA	43.4667	27.2292	16.2375	249.326	-11.793	75.3961	36.1632	39.2329	1325.74	-20.1328	1
71	B3GAT1	2.64906	15.7813	-2.57467	45.3848	31.2504	14.1344	141.047	-7.45111	NA	NA	NA	NA	NA	NA	NA	NA	NA	NA	#N/A
72	B3GNT3	83.2561	13.2847	2.64779	21.835	37.6418	-15.8068	343.27	-10.267	NA	NA	NA	NA	NA	NA	NA	NA	NA	NA	#N/A
73	B4GALNT3	44.5395	288.999	-2.69791	NA	NA	NA	NA	NA	NA	NA	NA	NA	NA	80.3225	63.699	16.6235	191.074	-7.83315	25
74	B4GALT1	1506.44	3262.5	-1.11484	NA	NA	NA	NA	NA	NA	NA	NA	NA	NA	54.5352	37.2179	17.3173	204.818	-5.88782	15
75	BAIAP2L1	88.4296	253.298	-1.51823	46.7584	35.0999	11.6586	85.5988	-5.32825	NA	NA	NA	NA	NA	NA	NA	NA	NA	NA	#N/A
76	BATF	44.446	20.8076	1.09494	NA	NA	NA	NA	NA	NA	NA	NA	NA	NA	20.2972	44.4866	-24.1894	742.915	-10.8076	3
77	BCKDHA	164.713	440.61	-1.41955	NA	NA	NA	NA	NA	NA	NA	NA	NA	NA	78.6585	63.4091	15.2494	150.727	-5.64448	1
78	BCL2L15	63.1029	346.045	-2.45518	78.0625	65.9955	12.067	96.6841	-6.79784	11.2969	55.7813	-44.4844	2069.87	-21.8689	15.75	56.375	-40.625	1911.9	-27.6678	2
79	BCL3	1271.58	441.274	1.52688	NA	NA	NA	NA	NA	NA	NA	NA	NA	NA	58.8351	34.3314	24.5037	463.515	-10.645	#N/A
80	BCL6	6197.96	2529.89	1.29272	NA	NA	NA	NA	NA	53.925	34.6881	19.2369	336.378	-7.77667	NA	NA	NA	NA	NA	#N/A
81	BCR	70.7907	222.735	-1.6537	NA	NA	NA	NA	NA	50.3094	30.2027	20.1067	369.141	-6.73607	NA	NA	NA	NA	NA	#N/A
82	BDA20	1.48635	6.96278	-2.22788	77.3686	65.1393	12.2293	98.8169	-6.41518	NA	NA	NA	NA	NA	NA	NA	NA	NA	NA	#N/A
83	BEST3	3.00565	35.3639	-3.55653	NA	NA	NA	NA	NA	NA	NA	NA	NA	NA	87.9306	70.5756	17.355	216.609	-10.1244	#N/A
84	BHLHA15	35.5816	572.384	-4.00778	27.4175	14.7315	12.686	118.474	-11.0131	NA	NA	NA	NA	NA	64.1992	40.4162	23.783	445.259	-13.0219	#N/A
85	BICDL1	43.6601	495.23	-3.50371	NA	NA	NA	NA	NA	NA	NA	NA	NA	NA	77.4195	62.3378	15.0817	156.331	-9.60644	#N/A
86	BNIP3	2052.83	624.911	1.71589	89.2394	76.3511	12.8883	111.216	-7.22909	NA	NA	NA	NA	NA	NA	NA	NA	NA	NA	#N/A
87	BOLA-DQA2	572.825	255.525	1.16463	NA	NA	NA	NA	NA	0	86	-86	7562.52	-48.3779	30.375	10.75	19.625	276.801	-7.93536	#N/A
88	BOLA_1	2775.68	1265.02	1.13368	26.8801	47.2869	-20.4069	526.76	-10.3098	NA	NA	NA	NA	NA	NA	NA	NA	NA	NA	#N/A
89	BRB	1290.91	520.194	1.31127	87.8155	74.396	13.4195	121.181	-6.64547	NA	NA	NA	NA	NA	NA	NA	NA	NA	NA	#N/A
90	BSPRY	43.3876	307.516	-2.82531	NA	NA	NA	NA	NA	NA	NA	NA	NA	NA	41.6093	28.8949	12.7143	100.815	-7.52384	2
91	BTK	726.826	320.065	1.18324	NA	NA	NA	NA	NA	43.7917	80.2083	-36.4167	1398.25	-12.2771	NA	NA	NA	NA	NA	1
92	BTN1A1	333.504	11572.4	-5.11685	89.921	72.6904	17.2306	241.423	-16.1566	NA	NA	NA	NA	NA	71.6553	60.0208	11.6345	98.6358	-15.3858	#N/A
93	C15H11orf34	11.7389	4.25564	1.46385	79.6869	63.5641	16.1228	187.948	-7.8579	78.8899	54.6295	24.2604	545.836	-9.58399	NA	NA	NA	NA	NA	#N/A
94	C15H11orf52	7.0446	17.6737	-1.32701	78.0416	53.1503	24.8913	502.378	-9.96623	NA	NA	NA	NA	NA	NA	NA	NA	NA	NA	#N/A
95	C1QTNF5	10.2122	27.047	-1.40517	NA	NA	NA	NA	NA	49.4833	32.9167	16.5667	245.375	-5.86737	NA	NA	NA	NA	NA	#N/A
96	C2	1406.26	465.506	1.59499	NA	NA	NA	NA	NA	NA	NA	NA	NA	NA	26.3625	13.6667	12.6958	96.2696	-6.67926	#N/A
97	C25H16orf54	661.058	217.019	1.60696	54.3279	67.5303	-13.2025	249.918	-7.54514	NA	NA	NA	NA	NA	51.9501	63.8009	-11.8508	224.765	-6.74583	2
98	C25H7orf61	3.28505	13.5485	-2.04415	81.1869	59.3119	21.875	378.655	-9.15331	NA	NA	NA	NA	NA	76.8184	42.2409	34.5775	998.294	-13.5333	#N/A
99	C28H10orf105	19.4996	7.41989	1.39397	NA	NA	NA	NA	NA	NA	NA	NA	NA	NA	84.4752	72.8734	11.6018	75.6795	-6.06654	#N/A
100	C2H2orf72	4.8258	61.7211	-3.67692	NA	NA	NA	NA	NA	NA	NA	NA	NA	NA	62.5323	51.1751	11.3572	81.6914	-9.76347	#N/A
101	C2H2orf80	8.65739	243.231	-4.81225	NA	NA	NA	NA	NA	60.375	30.375	30	865.503	-16.7019	NA	NA	NA	NA	NA	#N/A
102	C3	1520.37	5649.08	-1.89359	33.7019	23.5269	10.175	61.8203	-5.54468	9.6875	23.3333	-13.6458	216.173	-7.50006	62.6737	37.5486	25.1252	490.868	-8.96747	#N/A
103	C3H1orf162	4549.78	1239.49	1.87605	NA	NA	NA	NA	NA	11.2009	44.8646	-33.6637	1202.4	-11.7211	67.5927	85.7883	-18.1955	454.977	-8.98161	#N/A
104	C3H1orf210	17.5697	238.132	-3.7606	62.6057	34.5608	28.0449	665.152	-15.6202	57.732	20.5668	37.1652	1324.39	-15.3696	67.5151	50.5488	16.9663	207.067	-10.6731	#N/A
105	C4BPA	3.039	18.1583	-2.57896	NA	NA	NA	NA	NA	76.0625	50.9375	25.125	590.208	-9.14118	NA	NA	NA	NA	NA	#N/A
106	C5AR1	4330.22	1649.81	1.39214	NA	NA	NA	NA	NA	8.125	38.5	-30.375	983.803	-10.0722	NA	NA	NA	NA	NA	3
107	C5AR2	1098.89	534.029	1.04106	83.4925	64.2697	19.2227	280.78	-8.42344	50.1458	27.4792	22.6667	472.9	-8.27573	NA	NA	NA	NA	NA	1
108	C6H4orf19	13.396	62.1001	-2.21279	NA	NA	NA	NA	NA	NA	NA	NA	NA	NA	77.8373	65.9361	11.9012	82.8288	-6.17654	9
109	C6H4orf50	6.91561	17.3209	-1.32459	NA	NA	NA	NA	NA	82.6858	68.794	13.8919	168.805	-5.41032	NA	NA	NA	NA	NA	#N/A
110	C8H8orf58	5.15354	12.1918	-1.24227	76.8083	60.952	15.8563	179.359	-6.13743	NA	NA	NA	NA	NA	NA	NA	NA	NA	NA	#N/A
111	CAB39L	234.093	691.621	-1.5629	NA	NA	NA	NA	NA	NA	NA	NA	NA	NA	69.012	55.1469	13.8651	119.225	-5.53058	#N/A
112	CAC01G	7.2737	15.2965	-1.07244	54.7556	32.4283	22.3273	393.638	-8.56983	NA	NA	NA	NA	NA	NA	NA	NA	NA	NA	1
113	CAMK1G	65.621	25.8068	1.34641	NA	NA	NA	NA	NA	59.9015	25.7658	34.1357	1103.33	-13.1054	59.25	30.25	29	676.187	-12.5055	#N/A
114	CAPN14	32.675	227.056	-2.79679	76.7282	65.9659	10.7623	75.1379	-7.3102	75.5	43.625	31.875	963.202	-11.4005	NA	NA	NA	NA	NA	#N/A
115	CAPN3	93.4799	46.6692	1.00218	NA	NA	NA	NA	NA	64.6554	77.3301	-12.6747	187.031	-5.47881	NA	NA	NA	NA	NA	1
116	CAPNS2	8.84002	3.27311	1.43339	NA	NA	NA	NA	NA	61.4338	75.2878	-13.8539	221.738	-6.07781	NA	NA	NA	NA	NA	#N/A
117	CAPSL	2.7945	11.0392	-1.98198	84.1879	72.1974	11.9905	93.2692	-5.97843	87.5	37.875	49.625	2372.35	-18.0521	NA	NA	NA	NA	NA	#N/A
118	CARD10	10.275	21.4782	-1.06373	86.9	71.9351	14.9648	155.997	-5.76429	63.5556	31.5833	31.9722	963.042	-9.67889	67.7968	44.2138	23.583	422.904	-7.80616	#N/A
119	CARD9	138.389	50.832	1.44492	NA	NA	NA	NA	NA	NA	NA	NA	NA	NA	21.7445	32.9362	-11.1918	205.032	-6.39466	1
120	CASKIN2	38.12	103.728	-1.44418	NA	NA	NA	NA	NA	81.2375	52.0313	29.2063	799.937	-8.89392	NA	NA	NA	NA	NA	1
121	CASP1	149.15	40.9617	1.86442	NA	NA	NA	NA	NA	NA	NA	NA	NA	NA	3.72727	18.7107	-14.9835	328.833	-7.92823	#N/A
122	CASZ1	183.921	647.781	-1.81642	NA	NA	NA	NA	NA	NA	NA	NA	NA	NA	53.4674	37.1385	16.3289	179.427	-6.29361	#N/A
123	CATHL3	9.06606	2.44815	1.88878	64.8419	81.3381	-16.4962	365.33	-9.18913	75.1986	87.5188	-12.3201	180.316	-6.5406	NA	NA	NA	NA	NA	#N/A
124	CBFA2T3	107.943	52.2579	1.04654	27.8082	53.0208	-25.2126	769.89	-13.1615	10.5446	41.6496	-31.105	1029.13	-10.1297	NA	NA	NA	NA	NA	#N/A
125	CCDC112	145.591	67.1048	1.11743	NA	NA	NA	NA	NA	39.9896	80.1473	-40.1577	1691.68	-13.9326	NA	NA	NA	NA	NA	#N/A
126	CCDC160	8.29694	61.1541	-2.8818	NA	NA	NA	NA	NA	NA	NA	NA	NA	NA	46.0319	35.6322	10.3997	61.6889	-7.45358	#N/A
127	CCDC169	5.50991	2.5267	1.12478	NA	NA	NA	NA	NA	90.7745	80.3829	10.3916	90.706	-5.70539	NA	NA	NA	NA	NA	#N/A
128	CCDC188	4.39176	13.6656	-1.63767	80.6551	65.6382	15.017	158.678	-6.24053	NA	NA	NA	NA	NA	NA	NA	NA	NA	NA	#N/A
129	CCDC196	1.20495	13.4049	-3.47572	85.9119	69.0641	16.8478	216.683	-10.2652	74.1909	53.3393	20.8516	407.044	-10.3628	NA	NA	NA	NA	NA	#N/A
130	CCDC71L	303.364	631.932	-1.05872	85.8393	69.7457	16.0936	185.383	-6.10317	NA	NA	NA	NA	NA	NA	NA	NA	NA	NA	#N/A
131	CCDC80	196.837	45.3947	2.1164	NA	NA	NA	NA	NA	100	88.375	11.625	119.017	-7.88414	NA	NA	NA	NA	NA	1
132	CCDC88B	248.286	81.1649	1.61308	NA	NA	NA	NA	NA	6.13286	36.5296	-30.3967	985.894	-10.272	10.2009	58.9479	-48.747	2684.87	-28.696	1
133	CCL16	91.201	44.5206	1.03458	NA	NA	NA	NA	NA	31.1715	49.1466	-17.9751	359.663	-6.40851	NA	NA	NA	NA	NA	#N/A
134	CCL2	15533.3	3783.93	2.03741	57.5799	32.7716	24.8082	502.055	-13.5087	44.8488	25.0187	19.8301	361.119	-9.60676	92.1538	81.4167	10.7372	64.0095	-7.19224	#N/A
135	CCL26	2.55442	38.0919	-3.89841	NA	NA	NA	NA	NA	63.6063	26.5982	37.008	1314.05	-15.6952	76.75	33.0417	43.7083	1668.11	-22.4053	1
136	CCL28	8.99552	88.134	-3.29242	NA	NA	NA	NA	NA	67.7833	24.6375	43.1458	1790.14	-16.627	54.8045	44.4011	10.4035	64.1634	-8.54393	2
137	CCL3	2107.92	543.305	1.95599	46.8555	60.5698	-13.7142	267.608	-8.21231	14.125	54.8446	-40.7196	1741.01	-14.748	NA	NA	NA	NA	NA	1
138	CCR5	420.064	203.642	1.04457	NA	NA	NA	NA	NA	26.3333	57.5083	-31.175	1033.62	-10.1544	NA	NA	NA	NA	NA	#N/A
139	CCR9	44.6598	142.558	-1.6745	NA	NA	NA	NA	NA	85.75	69.9858	15.7642	221.709	-6.01677	NA	NA	NA	NA	NA	#N/A
140	CCRL2	2007.14	458.495	2.13016	39.172	59.2867	-20.1146	517.001	-11.2306	70.0425	91.6833	-21.6409	515.66	-8.50661	NA	NA	NA	NA	NA	1
141	CD101	1822.45	567.6	1.68293	NA	NA	NA	NA	NA	5.47917	57.2417	-51.7625	2782.26	-20.3753	NA	NA	NA	NA	NA	2
142	CD177	13.4671	5.97174	1.17321	NA	NA	NA	NA	NA	63.4033	76.8192	-13.4159	208.202	-5.73415	32.9261	82.3177	-49.3915	2750.69	-29.3006	2
143	CD2	208.964	430.085	-1.04137	NA	NA	NA	NA	NA	35.4583	51.7917	-16.3333	299.613	-6.66789	NA	NA	NA	NA	NA	#N/A
144	CD247	182.795	509.059	-1.4776	NA	NA	NA	NA	NA	15.7083	26.2917	-10.5833	134.855	-6.13189	NA	NA	NA	NA	NA	4
145	CD300A	170.571	55.0759	1.63088	36.4477	55.077	-18.6293	449.973	-9.82799	10.5493	57.4248	-46.8755	2290.71	-17.5558	NA	NA	NA	NA	NA	4
146	CD300LF	218.168	51.6954	2.07733	61.8177	73.3617	-11.544	202.429	-7.71186	13.6964	57.6174	-43.921	2018.61	-16.4061	NA	NA	NA	NA	NA	#N/A
147	CD3D	193.798	444.057	-1.19619	85.506	63.129	22.377	395.855	-8.64341	NA	NA	NA	NA	NA	87.1465	70.2939	16.8527	191.93	-5.8232	#N/A
148	CD3E	579.003	1685.07	-1.54116	NA	NA	NA	NA	NA	90.7083	73.2167	17.4917	275.477	-6.14475	NA	NA	NA	NA	NA	1
149	CD3G	152.048	429.24	-1.49726	85.506	63.129	22.377	396.576	-8.82552	74.625	50.5625	24.0625	535.879	-7.48031	87.2351	68.1244	19.1106	260.135	-6.62556	#N/A
150	CD53	3575.73	1731.68	1.04606	NA	NA	NA	NA	NA	8.77083	24.6875	-15.9167	286.004	-6.02578	NA	NA	NA	NA	NA	1
151	CD55	3991.2	1237.94	1.68888	NA	NA	NA	NA	NA	95.625	77.5	18.125	298.252	-8.3031	NA	NA	NA	NA	NA	#N/A
152	CD68	15254.6	7610.56	1.00316	NA	NA	NA	NA	NA	1.25	21.25	-20	440.345	-6.82396	55.875	40.5312	15.3438	152.717	-6.33792	#N/A
153	CD69	1280.92	637.785	1.00604	NA	NA	NA	NA	NA	NA	NA	NA	NA	NA	21.125	47.7903	-26.6653	883.662	-12.0536	#N/A
154	CD7	22.3366	161.152	-2.85094	78.0141	49.213	28.8011	698.602	-13.9619	30.3575	42.1129	-11.7554	168.813	-9.5056	NA	NA	NA	NA	NA	2
155	CD72	59.1853	19.7615	1.58255	NA	NA	NA	NA	NA	11.0774	54.4931	-43.4158	1971.56	-15.7231	NA	NA	NA	NA	NA	#N/A
156	CD79B	16.9682	7.55181	1.16794	NA	NA	NA	NA	NA	20.0563	50.0234	-29.967	957.768	-9.784	26.9131	53.2613	-26.3481	865.32	-11.9433	#N/A
157	CD80	540.519	226.7	1.25356	87.4432	72.709	14.7342	151.434	-6.98123	NA	NA	NA	NA	NA	36.1056	46.3778	-10.2722	179.135	-5.9849	#N/A
158	CDH16	5.75221	65.3832	-3.50673	83.2734	70.6628	12.6106	113.329	-9.42887	84.2437	53.3125	30.9312	909.993	-12.7027	NA	NA	NA	NA	NA	2
159	CDHR5	63.1488	6.2439	3.33824	NA	NA	NA	NA	NA	88.294	77.0354	11.2587	118.355	-11.5938	NA	NA	NA	NA	NA	#N/A
160	CDK18	35.2403	126.052	-1.83873	NA	NA	NA	NA	NA	NA	NA	NA	NA	NA	68.046	52.6226	15.4234	156.253	-6.1403	#N/A
161	CDKL1	4.87611	19.1811	-1.97588	83.9242	66.8771	17.0471	214.709	-7.24849	19.089	8.94227	10.1467	87.8725	-5.83336	25.5724	11.1241	14.4483	133.537	-6.15401	1
162	CDRT1	2.49442	8.83393	-1.82435	NA	NA	NA	NA	NA	65.4295	49.9545	15.475	213.708	-6.16029	NA	NA	NA	NA	NA	#N/A
163	CEACAM19	9.61656	63.2229	-2.71685	70.0237	33.3908	36.6329	1171.07	-19.125	75.8871	34.1208	41.7663	1672.34	-14.9756	90.525	79.5278	10.9972	69.9655	-7.10722	4
164	CEBPE	30.9387	11.5385	1.42296	12.4595	34.7278	-22.2683	616.361	-11.5602	26.0546	59.3436	-33.2891	1174.97	-11.1533	51.4973	85.71	-34.2126	1390.13	-16.8061	1
165	CELA2A	25.737	4.17668	2.62341	40.9239	61.0747	-20.1508	521.128	-12.1288	NA	NA	NA	NA	NA	NA	NA	NA	NA	NA	1
166	CELF5	26.8028	7.63457	1.81176	NA	NA	NA	NA	NA	NA	NA	NA	NA	NA	52.4499	42.1717	10.2782	56.2206	-6.59993	#N/A
167	CELSR2	475.466	230.918	1.04196	NA	NA	NA	NA	NA	NA	NA	NA	NA	NA	91.8315	79.097	12.7345	95.4029	-5.75484	1
168	CFAP206	7.52645	2.42905	1.63158	49.9924	64.3568	-14.3644	287.866	-7.99617	NA	NA	NA	NA	NA	NA	NA	NA	NA	NA	#N/A
169	CFAP73	1.4099	7.56028	-2.42285	88.6447	72.3095	16.3352	196.35	-7.73124	75.9274	27.2045	48.7228	2287.15	-17.9456	NA	NA	NA	NA	NA	2
170	CFB	363.511	167.404	1.11867	NA	NA	NA	NA	NA	59.5417	45.7083	13.8333	167.508	-6.27154	53.6333	33.875	19.7583	281.124	-7.9044	1
171	CFP	891.84	309.021	1.52908	NA	NA	NA	NA	NA	30.125	64.6667	-34.5417	1262.67	-11.7186	NA	NA	NA	NA	NA	#N/A
172	CGN	45.3397	104.504	-1.20472	NA	NA	NA	NA	NA	NA	NA	NA	NA	NA	58.8027	37.8373	20.9654	322.485	-6.96684	#N/A
173	CH25H	266.248	32.237	3.04599	51.126	39.9783	11.1476	84.8393	-10.208	NA	NA	NA	NA	NA	NA	NA	NA	NA	NA	#N/A
174	CHAC1	27.5857	92.6095	-1.74724	NA	NA	NA	NA	NA	NA	NA	NA	NA	NA	49.2974	37.3411	11.9563	82.0968	-5.46752	#N/A
175	CHRNB3	10.7682	21.6102	-1.00493	NA	NA	NA	NA	NA	16.2195	36.3066	-20.0872	443.419	-7.57869	NA	NA	NA	NA	NA	#N/A
176	CHRND	2.21301	6.59685	-1.57577	34.1517	19.7902	14.3615	142.529	-6.00027	NA	NA	NA	NA	NA	NA	NA	NA	NA	NA	1
177	CIDEA	42.0908	376.762	-3.16208	74.711	57.5539	17.1571	223.662	-9.53347	NA	NA	NA	NA	NA	NA	NA	NA	NA	NA	2
178	CIDEB	4.06702	18.3857	-2.17654	50.1577	38.108	12.0497	95.1474	-6.29513	61.9466	33.4408	28.5058	763.285	-9.39218	NA	NA	NA	NA	NA	#N/A
179	CITED4	101.538	1071.58	-3.39964	44.7295	33.5074	11.2221	86.4964	-8.91525	NA	NA	NA	NA	NA	NA	NA	NA	NA	NA	#N/A
180	CLDN3	294.432	934.743	-1.66664	NA	NA	NA	NA	NA	20.3126	6.29604	14.0165	172.969	-5.77434	NA	NA	NA	NA	NA	#N/A
181	CLDN7	157.08	407.322	-1.37467	79.7044	48.9979	30.7064	796.624	-13.4931	70.2446	24.9268	45.3177	1969.75	-15.5277	59.5262	24.3759	35.1502	1032.65	-13.4351	#N/A
182	CLDN8	13.6645	351.137	-4.68353	74.5354	42.7206	31.8148	879.424	-20.6859	68.8724	31.2771	37.5953	1363.25	-18.4218	NA	NA	NA	NA	NA	2
183	CLEC12A	1358.05	563.214	1.26979	64.9502	75.0848	-10.1346	161.86	-6.2043	14.875	50.75	-35.875	1358.3	-12.0891	NA	NA	NA	NA	NA	#N/A
184	CLEC3B	2.71084	8.73599	-1.68823	80.7055	69.5626	11.1429	76.9233	-5.42647	NA	NA	NA	NA	NA	69.0057	57.2005	11.8052	79.2384	-5.3726	1
185	CLEC4A	652.214	266.92	1.28894	NA	NA	NA	NA	NA	17.625	62.3667	-44.7417	2090.05	-16.2635	17.4375	61.9667	-44.5292	2264.78	-24.7859	1
186	CLEC4D	337.529	123.202	1.45399	NA	NA	NA	NA	NA	27.625	73.25	-45.625	2172.06	-16.7924	NA	NA	NA	NA	NA	#N/A
187	CLEC4E	191.495	51.5662	1.89281	NA	NA	NA	NA	NA	NA	NA	NA	NA	NA	44.375	65.9356	-21.5606	609.28	-10.3026	#N/A
188	CLEC6A	263.923	85.672	1.62322	NA	NA	NA	NA	NA	NA	NA	NA	NA	NA	90.6857	80.0521	10.6336	60.7925	-6.28993	#N/A
189	CLECL1	193.763	63.4866	1.60977	37.6563	68.8795	-31.2232	1140.92	-17.887	NA	NA	NA	NA	NA	51.7357	75.1787	-23.443	704.366	-10.8129	#N/A
190	CLMN	264.75	5074.88	-4.26067	NA	NA	NA	NA	NA	NA	NA	NA	NA	NA	75.4003	61.8717	13.5285	126.997	-11.9422	#N/A
191	CLNK	13.5034	30.1989	-1.16118	NA	NA	NA	NA	NA	50.825	62.7625	-11.9375	167.19	-5.9121	NA	NA	NA	NA	NA	#N/A
192	CMKLR1	1064.44	306.827	1.79459	NA	NA	NA	NA	NA	39.3959	51.9171	-12.5212	185.32	-6.40917	NA	NA	NA	NA	NA	#N/A
193	CNFN	2.85401	28.7549	-3.33275	NA	NA	NA	NA	NA	81.2083	50.9777	30.2307	867.34	-12.0666	66.7253	51.6361	15.0892	155.392	-9.12099	#N/A
194	CNGA1	2.99617	7.44955	-1.31403	85.4507	66.7584	18.6923	263.273	-7.15172	76.25	42.875	33.375	1052.56	-10.2529	NA	NA	NA	NA	NA	#N/A
195	CNIH2	2.57288	14.1929	-2.46371	NA	NA	NA	NA	NA	15.8739	48.0114	-32.1374	1100.34	-15.2768	NA	NA	NA	NA	NA	#N/A
196	CNKSR1	12.554	37.5861	-1.58206	NA	NA	NA	NA	NA	NA	NA	NA	NA	NA	55.6657	41.9257	13.7399	116.585	-5.53043	#N/A
197	CNN1	2.84881	7.0456	-1.30636	NA	NA	NA	NA	NA	NA	NA	NA	NA	NA	36.7276	22.6669	14.0608	122.836	-5.32082	#N/A
198	CNTN2	4.75554	10.0164	-1.07468	60.5746	45.2394	15.3353	165.383	-5.8786	NA	NA	NA	NA	NA	NA	NA	NA	NA	NA	#N/A
199	COL14A1	90.2018	207.647	-1.20291	NA	NA	NA	NA	NA	20.5645	61.9033	-41.3388	1789.7	-16.6392	NA	NA	NA	NA	NA	#N/A
200	COL8A1	3.11546	6.92653	-1.15269	NA	NA	NA	NA	NA	6.0625	16.75	-10.6875	136.51	-5.68303	NA	NA	NA	NA	NA	2
201	COL9A1	6.14543	129.023	-4.39197	74.5675	57.8566	16.7108	219.712	-13.1575	NA	NA	NA	NA	NA	NA	NA	NA	NA	NA	#N/A
202	CPA3	51.8551	15.6849	1.72511	NA	NA	NA	NA	NA	17.1042	63.5667	-46.4625	2251.72	-17.3948	13.0833	44.125	-31.0417	1164.98	-14.9771	1
203	CPQ	4.21866	10.4138	-1.30364	NA	NA	NA	NA	NA	60.3788	38.7737	21.6051	427.853	-6.76032	NA	NA	NA	NA	NA	2
204	CPXM2	2.93817	15.5985	-2.40842	NA	NA	NA	NA	NA	NA	NA	NA	NA	NA	75.0842	62.5595	12.5246	95.116	-6.61122	3
205	CRABP1	2.38661	7.48793	-1.64961	32.5891	56.7385	-24.1495	712.902	-14.7624	NA	NA	NA	NA	NA	NA	NA	NA	NA	NA	#N/A
206	CRACR2B	5.9218	40.129	-2.76054	77.8494	50.1348	27.7145	642.166	-13.1713	59.25	26.8125	32.4375	998.114	-11.5123	NA	NA	NA	NA	NA	#N/A
207	CRCT1	425.818	194.746	1.12864	85.1953	72.7141	12.4812	101.086	-6.07922	NA	NA	NA	NA	NA	NA	NA	NA	NA	NA	#N/A
208	CRTAM	39.0009	560.979	-3.84637	NA	NA	NA	NA	NA	20.0208	41.8125	-21.7917	531.001	-16.0385	NA	NA	NA	NA	NA	#N/A
209	CRYAB	265.918	776.772	-1.54651	39.0668	20.0289	19.0379	275.173	-7.46238	73.3704	37.5546	35.8159	1217.39	-11.2863	75.7582	34.5409	41.2173	1459.55	-17.3802	1
210	CRYBG2	36.0824	89.2438	-1.30645	NA	NA	NA	NA	NA	NA	NA	NA	NA	NA	60.5904	39.0287	21.5617	344.448	-7.21648	1
211	CSF1R	4805.94	2123.82	1.17816	NA	NA	NA	NA	NA	32.5969	74.5741	-41.9772	1844.74	-14.8261	NA	NA	NA	NA	NA	1
212	CSF2RB	4349.55	12822.9	-1.55978	NA	NA	NA	NA	NA	4.75	21.4375	-16.6875	313.179	-7.56423	61.3552	47.4938	13.8614	119.136	-5.5266	4
213	CSKMT	72.9936	164.997	-1.1766	NA	NA	NA	NA	NA	38.65	19.75	18.9	323.16	-6.11584	NA	NA	NA	NA	NA	#N/A
214	CSN1S1	23948.4	855219	-5.1583	82.0222	68.9144	13.1078	137.441	-15.5729	NA	NA	NA	NA	NA	77.375	54.8259	22.5491	405.812	-17.0112	#N/A
215	CSN1S2	10617.7	414012	-5.28514	NA	NA	NA	NA	NA	59.5	46.25	13.25	177.623	-16.5135	77.3333	62.0833	15.25	175.565	-16.3798	#N/A
216	CSN2	33756.8	1.40335e+06	-5.37755	73.5425	52.3006	21.2419	378.28	-18.4378	NA	NA	NA	NA	NA	85.0277	61.05	23.9777	465.844	-18.3325	#N/A
217	CSN3	6953.22	297632	-5.41971	67.375	47.175	20.2	340.773	-18.2951	65.625	38.9583	26.6667	689.004	-18.5684	74.0443	44.3237	29.7206	739.767	-20.3177	#N/A
218	CSRNP3	9.5535	20.4874	-1.10064	NA	NA	NA	NA	NA	44.8083	23.9417	20.8667	397.47	-6.48413	NA	NA	NA	NA	NA	#N/A
219	CST7	68.5663	166.734	-1.28198	33.5893	63.1446	-29.5553	1029.38	-18.1903	10.9258	47.4782	-36.5524	1407.93	-14.3392	NA	NA	NA	NA	NA	#N/A
220	CTH	29.2558	106.96	-1.87028	NA	NA	NA	NA	NA	NA	NA	NA	NA	NA	68.3264	58.3073	10.0191	51.7099	-5.4322	#N/A
221	CTN03	13.9341	69.0663	-2.30937	NA	NA	NA	NA	NA	81.1875	68.6042	12.5833	139.945	-6.59943	NA	NA	NA	NA	NA	#N/A
222	CTNNBIP1	41.4343	84.3697	-1.0259	13.6526	30.3539	-16.7013	369.789	-9.16325	NA	NA	NA	NA	NA	NA	NA	NA	NA	NA	#N/A
223	CTSW	143.991	745.932	-2.37306	NA	NA	NA	NA	NA	9.625	39.125	-29.5	932.333	-13.8336	NA	NA	NA	NA	NA	#N/A
224	CUEDC1	77.8702	441.993	-2.50488	NA	NA	NA	NA	NA	NA	NA	NA	NA	NA	64.3149	50.9654	13.3495	111.892	-6.90582	19
225	CXCL11	11.9412	61.9184	-2.37442	NA	NA	NA	NA	NA	67.0417	25.0625	41.9792	1688.12	-14.5974	63.6667	30.4167	33.25	917.69	-13.1973	#N/A
226	CXCL13	17.4202	7.20069	1.27455	55.2186	70.9036	-15.685	333.03	-8.14707	NA	NA	NA	NA	NA	NA	NA	NA	NA	NA	#N/A
227	CXCL17	2.93794	13.7101	-2.22236	71.1139	52.3852	18.7287	267.393	-8.16392	72.9583	42.3786	30.5798	882.062	-10.0751	85.9044	74.456	11.4484	75.0477	-6.14424	2
228	CXCR1	7712.86	2607.02	1.56486	71.5435	53.7589	17.7845	236.293	-8.73054	NA	NA	NA	NA	NA	NA	NA	NA	NA	NA	#N/A
229	CXCR2	9237.86	3823.33	1.27273	NA	NA	NA	NA	NA	NA	NA	NA	NA	NA	45.6458	30.8917	14.7542	139.245	-6.60534	#N/A
230	CXHXorf21	251.404	121.488	1.0492	79.7677	65.5245	14.2432	139.137	-6.50114	35.1667	64.625	-29.4583	926.271	-9.54968	NA	NA	NA	NA	NA	#N/A
231	CYB561	43.447	161.102	-1.89065	NA	NA	NA	NA	NA	NA	NA	NA	NA	NA	59.5117	41.552	17.9597	225.686	-6.75405	2
232	CYP24A1	6.3389	14.6563	-1.20922	NA	NA	NA	NA	NA	NA	NA	NA	NA	NA	34.3815	46.8708	-12.4894	242.271	-7.19094	#N/A
233	CYP27B1	280.79	55.9521	2.32723	87.3466	74.8704	12.4762	105.484	-8.51721	36.2861	19.2561	17.03	264.595	-9.6404	NA	NA	NA	NA	NA	#N/A
234	CYP39A1	15.8481	32.9972	-1.05803	NA	NA	NA	NA	NA	83.4962	48.2272	35.269	1178.43	-10.922	NA	NA	NA	NA	NA	#N/A
235	CYSRT1	5.31986	11.5346	-1.11651	NA	NA	NA	NA	NA	83.7689	36.7143	47.0547	2126.32	-16.4447	77.9143	54.7321	23.1821	406.696	-7.67802	#N/A
236	DAB2	904.609	241.486	1.90535	NA	NA	NA	NA	NA	NA	NA	NA	NA	NA	60.1097	40.1155	19.9942	291.669	-9.62438	#N/A
237	DCSTAMP	925.316	282.832	1.71	NA	NA	NA	NA	NA	NA	NA	NA	NA	NA	71.9625	85.9973	-14.0348	294.942	-7.44422	#N/A
238	DCX	16.0162	43.3189	-1.43546	54.2652	40.9952	13.27	117.466	-5.59213	NA	NA	NA	NA	NA	NA	NA	NA	NA	NA	#N/A
239	DDO	1.4622	17.3313	-3.56716	74.2684	46.3575	27.9109	656.968	-15.0357	NA	NA	NA	NA	NA	65.9338	41.5236	24.4102	468.462	-11.912	1
240	DEFB4A	521.386	218.32	1.25591	NA	NA	NA	NA	NA	37.2667	68.925	-31.6583	1065.46	-10.4356	32.0122	51.3305	-19.3183	501.804	-8.74941	#N/A
241	DEFB7	215.483	63.8293	1.75528	NA	NA	NA	NA	NA	36.7031	65.2344	-28.5312	872.93	-9.81357	35.1208	55.0833	-19.9625	532.667	-9.48469	#N/A
242	DHRS11	99.5191	425.779	-2.09706	NA	NA	NA	NA	NA	NA	NA	NA	NA	NA	54.8688	36.574	18.2947	236.561	-7.11873	1
243	DHX34	578.78	246.393	1.23205	95.2094	85.1695	10.0398	58.6265	-5.61091	NA	NA	NA	NA	NA	NA	NA	NA	NA	NA	1
244	DIO2	41.3398	1081.18	-4.70893	56.6687	26.3778	30.2908	792.652	-19.8679	50.3956	25.6378	24.7578	587.487	-15.1895	73.7114	56.8184	16.893	212.794	-14.0636	1
245	DKK4	18.1532	3.64953	2.31444	48.231	60.6699	-12.4389	229.492	-8.41555	26.5055	64.5265	-38.021	1525.02	-14.025	40.0193	65.9724	-25.953	846.571	-12.904	#N/A
246	DMTN	2.50212	16.3894	-2.71154	23.8781	35.8062	-11.9281	214.984	-10.419	NA	NA	NA	NA	NA	NA	NA	NA	NA	NA	#N/A
247	D0JC12	146.914	4226.22	-4.84633	78.9715	66.3741	12.5974	123.854	-14.1622	NA	NA	NA	NA	NA	NA	NA	NA	NA	NA	1
248	D0SE1L3	4.05832	13.4569	-1.72939	NA	NA	NA	NA	NA	71.3535	54.2484	17.1051	263.4	-6.28383	NA	NA	NA	NA	NA	#N/A
249	DOK3	56.4665	15.9211	1.82646	NA	NA	NA	NA	NA	NA	NA	NA	NA	NA	36.4458	66.4538	-30.0079	1095.97	-14.4563	6
250	DSG3	9.01042	20.7849	-1.20587	NA	NA	NA	NA	NA	32.1298	18.0229	14.1069	174.15	-5.34508	NA	NA	NA	NA	NA	#N/A
251	DSP	750.553	1649.55	-1.13605	NA	NA	NA	NA	NA	NA	NA	NA	NA	NA	39.262	20.826	18.436	238.056	-6.18907	6
252	DYNLL2	564.848	1512.5	-1.421	69.7806	53.4513	16.3293	192.633	-6.41914	NA	NA	NA	NA	NA	NA	NA	NA	NA	NA	#N/A
253	EBI3	61.9739	12.8209	2.27316	NA	NA	NA	NA	NA	4.3125	15.5937	-11.2812	155.529	-7.16236	NA	NA	NA	NA	NA	#N/A
254	ECHDC1	271.179	2507.03	-3.20866	NA	NA	NA	NA	NA	NA	NA	NA	NA	NA	83.809	70.5913	13.2177	113.013	-8.54415	2
255	ECHDC2	55.0791	166.018	-1.59176	71.9007	60.6184	11.2823	79.0621	-5.33783	NA	NA	NA	NA	NA	77.2696	60.1291	17.1405	200.954	-6.21778	3
256	ECM2	7.80489	17.3804	-1.15501	92.4377	69.167	23.2707	432.08	-9.05683	79.3125	36.1875	43.125	1779.51	-14.4147	NA	NA	NA	NA	NA	2
257	EDNRB	2673.67	925.951	1.52982	87.6387	71.8931	15.7456	178.037	-7.84032	NA	NA	NA	NA	NA	NA	NA	NA	NA	NA	1
258	EEF1D	352.802	945.115	-1.42163	49.5477	32.6858	16.8619	207.641	-6.58996	NA	NA	NA	NA	NA	40.2887	25.3675	14.9212	142.826	-5.58175	4
259	EFHC1	14.5253	87.2772	-2.58704	NA	NA	NA	NA	NA	NA	NA	NA	NA	NA	44.4291	31.7882	12.6409	98.1762	-6.98611	1
260	EFHD1	117.908	1785.19	-3.92035	NA	NA	NA	NA	NA	NA	NA	NA	NA	NA	70.0523	54.8283	15.2241	162.755	-10.9293	10
261	EHBP1	135.606	423.882	-1.64425	67.6676	50.8704	16.7972	206.403	-6.77556	NA	NA	NA	NA	NA	NA	NA	NA	NA	NA	#N/A
262	EHF	518.188	6403.69	-3.62736	60.7573	28.2342	32.5232	912.979	-17.9727	76.9167	35.7917	41.125	1625.92	-16.5343	72.5142	35.9677	36.5465	1134.9	-17.3276	23
263	ELANE	13.0414	3.77933	1.7869	43.305	57.7241	-14.4192	290.293	-8.21955	12.25	44.4083	-32.1583	1100.09	-11.0688	NA	NA	NA	NA	NA	#N/A
264	ELF3	77.8964	179.826	-1.20698	80.2803	52.6021	27.6782	634.634	-11.495	51.3304	17.2695	34.0609	1097.26	-10.4763	69.7582	27.533	42.2252	1536.69	-18.0573	4
265	ELF5	512.846	14921.3	-4.86271	64.1343	42.9476	21.1866	371.095	-16.2581	68.8416	24.9382	43.9034	1866.99	-21.4302	66.0948	33.6268	32.468	888.356	-19.1546	2
266	ELMO3	58.1227	154.485	-1.4103	77.8373	62.6507	15.1866	162.326	-6.06856	59.8547	34.7112	25.1435	586.782	-7.69613	50.0833	29.702	20.3813	302.366	-6.91864	1
267	ELN	24.316	10.2841	1.24149	NA	NA	NA	NA	NA	NA	NA	NA	NA	NA	82.9739	68.1668	14.8072	140.402	-6.56678	1
268	EML4	1474.21	704.971	1.06431	NA	NA	NA	NA	NA	75.0521	38.8437	36.2083	1244.42	-13.4294	72.9623	53.9138	19.0485	257.757	-7.56583	#N/A
269	EMP3	845.174	393.904	1.10141	18.9684	34.0568	-15.0884	311.214	-7.76392	NA	NA	NA	NA	NA	NA	NA	NA	NA	NA	#N/A
270	ENO4	7.6722	30.2349	-1.9785	NA	NA	NA	NA	NA	86.5516	71.0312	15.5204	215.568	-6.37945	NA	NA	NA	NA	NA	#N/A
271	ENPP3	28.928	214.965	-2.89356	NA	NA	NA	NA	NA	67.8125	31.8542	35.9583	1232.93	-12.9599	NA	NA	NA	NA	NA	#N/A
272	ENPP6	5.60568	12.8236	-1.19384	81.833	58.3581	23.4748	440.678	-9.1743	85.0625	65.625	19.4375	342.778	-6.2321	NA	NA	NA	NA	NA	#N/A
273	EPHB3	39.1324	101.093	-1.36925	NA	NA	NA	NA	NA	NA	NA	NA	NA	NA	49.5316	33.1521	16.3794	179.474	-5.84044	7
274	EPHB6	4.62906	16.7595	-1.85619	NA	NA	NA	NA	NA	NA	NA	NA	NA	NA	71.2529	60.6581	10.5948	60.0299	-5.46465	#N/A
275	EPHX1	31.2394	152.83	-2.29049	76.0442	49.9258	26.1184	562.014	-11.5435	NA	NA	NA	NA	NA	NA	NA	NA	NA	NA	3
276	EPS8L1	93.4303	207.016	-1.14778	58.0045	36.703	21.3015	354.174	-8.12893	NA	NA	NA	NA	NA	NA	NA	NA	NA	NA	#N/A
277	ERAS	26.6719	10.8967	1.29143	NA	NA	NA	NA	NA	NA	NA	NA	NA	NA	74.1335	64.0488	10.0847	51.6951	-5.60507	#N/A
278	ERBB4	20.6237	71.829	-1.80027	52.0153	41.0653	10.95	73.9862	-5.53671	NA	NA	NA	NA	NA	NA	NA	NA	NA	NA	#N/A
279	ERRFI1	157.923	328.661	-1.05738	NA	NA	NA	NA	NA	NA	NA	NA	NA	NA	53.8036	32.9242	20.8794	319.118	-6.87144	10
280	ESR1	52.1966	666.986	-3.67563	NA	NA	NA	NA	NA	13.7188	53.7902	-40.0714	1695.45	-24.0245	NA	NA	NA	NA	NA	#N/A
281	ESRRB	4.09745	23.9958	-2.54998	NA	NA	NA	NA	NA	45.1667	29.0208	16.1458	236.602	-7.45121	NA	NA	NA	NA	NA	#N/A
282	ETV2	5.02027	11.743	-1.22596	NA	NA	NA	NA	NA	NA	NA	NA	NA	NA	31.375	52.0417	-20.6667	563.135	-10.56	#N/A
283	EVI2B	4736.57	2008.95	1.2374	52.8107	63.1252	-10.3144	166.35	-6.22314	8.0625	55.7083	-47.6458	2363.75	-17.8254	30.9954	64.1545	-33.1591	1312.2	-16.0272	4
284	EXOC3L4	4.84826	16.9893	-1.80909	68.7415	49.4462	19.2953	284.553	-7.82275	73.1848	36.4639	36.7209	1282.11	-11.8161	NA	NA	NA	NA	NA	#N/A
285	EYA4	8.1346	21.7292	-1.41749	83.1104	68.9318	14.1786	137.8	-5.80072	NA	NA	NA	NA	NA	NA	NA	NA	NA	NA	#N/A
286	F11	18.3352	4.04511	2.18037	NA	NA	NA	NA	NA	67.1458	54.9792	12.1667	131.165	-8.14885	NA	NA	NA	NA	NA	#N/A
287	F2RL2	391.124	178.916	1.12834	NA	NA	NA	NA	NA	11.0603	34.6342	-23.5739	603.189	-7.79359	82.1977	71.99	10.2077	53.0031	-5.38026	#N/A
288	F5	950.906	419.344	1.18117	NA	NA	NA	NA	NA	NA	NA	NA	NA	NA	71.7624	82.2528	-10.4904	184.795	-5.96474	#N/A
289	FABP3	634.174	16069.6	-4.66331	NA	NA	NA	NA	NA	NA	NA	NA	NA	NA	47.7681	34.275	13.4932	129.736	-13.5108	1
290	FAM107A	49.0717	1250.27	-4.6712	82.1445	59.1227	23.0218	441.247	-16.2004	69.2016	28.6538	40.5479	1588.24	-19.4297	NA	NA	NA	NA	NA	#N/A
291	FAM114A1	287.796	1070.79	-1.89556	44.3448	32.6623	11.6825	87.2138	-5.79626	NA	NA	NA	NA	NA	NA	NA	NA	NA	NA	#N/A
292	FAM129A	2948.25	1179.49	1.3217	33.031	22.0828	10.9482	73.3897	-5.96677	NA	NA	NA	NA	NA	NA	NA	NA	NA	NA	#N/A
293	FAM167A	40.6069	17.0699	1.25027	NA	NA	NA	NA	NA	NA	NA	NA	NA	NA	70.757	58.4042	12.3529	88.6846	-5.98675	1
294	FAM167B	78.9286	15.7764	2.32278	NA	NA	NA	NA	NA	87.3864	60.4515	26.9348	681.162	-12.7676	NA	NA	NA	NA	NA	2
295	FAM169A	7.64077	15.6601	-1.0353	NA	NA	NA	NA	NA	40.771	21.0125	19.7585	354.443	-6.21775	NA	NA	NA	NA	NA	2
296	FAM181B	4.06602	16.67	-2.03556	83.9009	65.0141	18.8868	271.809	-7.95174	NA	NA	NA	NA	NA	NA	NA	NA	NA	NA	#N/A
297	FAM198A	8.06142	40.8181	-2.3401	NA	NA	NA	NA	NA	NA	NA	NA	NA	NA	80.4784	70.054	10.4244	59.3783	-6.26792	#N/A
298	FAM46B	38.7486	89.5899	-1.20919	NA	NA	NA	NA	NA	NA	NA	NA	NA	NA	64.0156	42.7381	21.2775	333.782	-7.06889	#N/A
299	FAM83A	2.70706	9.81652	-1.85848	NA	NA	NA	NA	NA	70.7891	50.5722	20.2168	374.031	-6.98806	NA	NA	NA	NA	NA	#N/A
300	FAM83F	57.4698	276.147	-2.26456	NA	NA	NA	NA	NA	32.592	15.5548	17.0372	263.19	-7.0432	83.2045	66.7705	16.4341	183.935	-6.97471	#N/A
301	FAT2	21.4883	129.45	-2.59077	76.5874	64.6364	11.951	95.125	-7.04727	65.875	37.6562	28.2188	749.402	-9.95224	80.3055	62.2172	18.0882	232.478	-7.91817	1
302	FAXC	11.236	40.3632	-1.84492	71.1576	60.7434	10.4142	65.3766	-5.51147	NA	NA	NA	NA	NA	NA	NA	NA	NA	NA	#N/A
303	FBN2	5.43017	132.008	-4.60348	NA	NA	NA	NA	NA	NA	NA	NA	NA	NA	16.237	26.7673	-10.5303	204.036	-16.979	#N/A
304	FBP2	2.65854	18.7176	-2.81569	82.77	71.9339	10.836	76.4605	-7.36361	87.2374	69.6574	17.58	283.586	-8.20567	NA	NA	NA	NA	NA	1
305	FBXL19	219.398	451.885	-1.04241	NA	NA	NA	NA	NA	NA	NA	NA	NA	NA	58.0029	32.1509	25.852	521.244	-8.69218	#N/A
306	FBXO32_1	115.719	309.104	-1.41746	85.4165	72.658	12.7585	106.672	-5.4579	NA	NA	NA	NA	NA	NA	NA	NA	NA	NA	#N/A
307	FCAMR	6.60783	80.0958	-3.59948	73.9162	57.3838	16.5323	208.576	-10.5307	70.7259	53.8571	16.8687	265.236	-10.1793	51.2401	37.4975	13.7426	126.524	-9.72647	#N/A
308	FCER1G	5825.39	2098.35	1.4731	NA	NA	NA	NA	NA	13.0495	56.8607	-43.8112	2006.45	-15.8596	23.799	71.2259	-47.4269	2549.42	-27.4256	3
309	FCGR1A	777.883	205.153	1.92285	NA	NA	NA	NA	NA	NA	NA	NA	NA	NA	19.8125	50.5833	-30.7708	1147.37	-15.0046	#N/A
310	FCGR2A	174.298	75.4475	1.20801	80.2178	92.0938	-11.876	208.754	-6.67196	NA	NA	NA	NA	NA	NA	NA	NA	NA	NA	1
311	FCGR3A	668.782	146.735	2.18832	NA	NA	NA	NA	NA	14.0625	49.5625	-35.5	1334.26	-12.8255	NA	NA	NA	NA	NA	1
312	FERMT2	53.6866	299.1	-2.47799	NA	NA	NA	NA	NA	28.7374	16.9677	11.7696	122.437	-6.86076	NA	NA	NA	NA	NA	#N/A
313	FERMT3	1834.56	876.464	1.06567	NA	NA	NA	NA	NA	11.7795	32.5	-20.7205	471.202	-7.03176	13.1425	54.2244	-41.0818	1948.11	-21.861	1
314	FES	761.274	304.197	1.32341	47.5594	35.991	11.5683	84.2468	-6.12983	NA	NA	NA	NA	NA	10.3519	31.8578	-21.5059	604.598	-9.70218	1
315	FFAR2	200.621	39.1018	2.35917	NA	NA	NA	NA	NA	18.4923	41.651	-23.1587	587.647	-9.26371	NA	NA	NA	NA	NA	#N/A
316	FGF23	11.0446	4.77458	1.2099	NA	NA	NA	NA	NA	60.1254	41.3492	18.7762	319.513	-7.50866	NA	NA	NA	NA	NA	#N/A
317	FGFBP1	53.7743	1421.09	-4.72394	79.1228	68.745	10.3778	82.8587	-13.4281	61.75	40.25	21.5	443.136	-14.7268	70.7881	43.1468	27.6413	626.272	-16.741	#N/A
318	FGFR3	8.69913	20.67	-1.24859	68.0284	54.9446	13.0838	113.046	-5.39044	NA	NA	NA	NA	NA	NA	NA	NA	NA	NA	#N/A
319	FGG	11.4245	220.978	-4.27371	NA	NA	NA	NA	NA	81.2758	63.2315	18.0443	309.15	-12.5647	76.625	63.625	13	116.296	-11.9472	#N/A
320	FGR	2883.65	861.692	1.74265	NA	NA	NA	NA	NA	NA	NA	NA	NA	NA	29.762	40.3869	-10.6249	190.252	-6.6553	2
321	FHL3	855.519	373.998	1.19377	54.2065	77.1755	-22.969	650.908	-11.8122	8.625	53.75	-45.125	2124.97	-16.441	19.0469	30.8797	-11.8329	222.956	-6.29431	2
322	FMNL1	2921.87	1292.02	1.17727	NA	NA	NA	NA	NA	NA	NA	NA	NA	NA	36.9192	50.9589	-14.0398	293.424	-6.87939	#N/A
323	FNDC4	14.9622	56.2333	-1.9101	NA	NA	NA	NA	NA	NA	NA	NA	NA	NA	38	19.6032	18.3968	238.99	-6.88538	#N/A
324	FOLR3	9.11411	313.05	-5.10215	90.2731	76.1164	14.1567	160.217	-15.4798	NA	NA	NA	NA	NA	63.6583	38.9052	24.7531	496.11	-17.342	1
325	FOXI1	2.61571	14.4671	-2.4675	72.5704	61.573	10.9974	77.4379	-6.64514	35.6327	19.1233	16.5094	247.393	-7.33689	73.3313	54.914	18.4173	241.903	-7.75946	1
326	FOXQ1	98.7469	480.836	-2.28374	49.6854	35.5082	14.1772	140.718	-6.92445	NA	NA	NA	NA	NA	NA	NA	NA	NA	NA	#N/A
327	FRK	27.7302	64.3142	-1.21368	85.9842	61.4432	24.5411	486.567	-9.72812	69.1871	31.3856	37.8015	1358.96	-11.9809	NA	NA	NA	NA	NA	#N/A
328	FRMD6	87.6096	249.819	-1.51173	NA	NA	NA	NA	NA	NA	NA	NA	NA	NA	76.625	46.125	30.5	755.983	-10.9892	1
329	FUT4	145.516	67.5227	1.10773	NA	NA	NA	NA	NA	41.5633	53.7879	-12.2247	175.221	-5.50926	NA	NA	NA	NA	NA	#N/A
330	FUT7	20.4306	7.86618	1.377	6.80477	25.424	-18.6192	448.71	-9.56916	NA	NA	NA	NA	NA	NA	NA	NA	NA	NA	#N/A
331	FXYD6	132.003	570.571	-2.11184	61.5106	45.4495	16.0612	187.528	-7.14318	NA	NA	NA	NA	NA	NA	NA	NA	NA	NA	11
332	FZD1	21.1379	68.4337	-1.69487	NA	NA	NA	NA	NA	23.5596	12.4173	11.1423	106.221	-5.50751	NA	NA	NA	NA	NA	3
333	FZD10	4.65849	31.9918	-2.77977	NA	NA	NA	NA	NA	25.7257	39.5599	-13.8341	225.587	-9.77801	NA	NA	NA	NA	NA	#N/A
334	FZD7	89.2408	279.372	-1.64641	NA	NA	NA	NA	NA	29.0922	10.6026	18.4896	309.787	-6.42471	NA	NA	NA	NA	NA	#N/A
335	G0S2	1498.62	309.008	2.27792	41.5402	26.3264	15.2139	167.313	-9.34469	NA	NA	NA	NA	NA	NA	NA	NA	NA	NA	1
336	GAL3ST4	14.2598	6.65211	1.10007	NA	NA	NA	NA	NA	NA	NA	NA	NA	NA	14.685	25.1084	-10.4234	182.778	-5.87923	#N/A
337	GALNT5	11.3826	29.4245	-1.37019	NA	NA	NA	NA	NA	53.4408	38.1295	15.3113	207.662	-5.64491	NA	NA	NA	NA	NA	#N/A
338	GALNT8	3.23055	6.96697	-1.10875	NA	NA	NA	NA	NA	69.1556	44.4774	24.6782	563.817	-7.41585	NA	NA	NA	NA	NA	#N/A
339	GAPT	429.054	134.595	1.67254	72.1325	84.89	-12.7575	236.368	-7.4771	11.0625	35.6667	-24.6042	656.471	-8.57233	43.2249	70.3786	-27.1537	914.892	-12.7175	1
340	GATA3	171.108	1038.17	-2.60106	NA	NA	NA	NA	NA	32.2412	59.0625	-26.8213	777.429	-13.4165	17.9768	31.6164	-13.6396	284.226	-10.6136	5
341	GBP4	849.536	228.351	1.89542	NA	NA	NA	NA	NA	45	73	-28	842.439	-9.82311	21.7667	40.9667	-19.2	498.723	-9.37275	#N/A
342	GCAT	17.5537	287.59	-4.03417	NA	NA	NA	NA	NA	NA	NA	NA	NA	NA	42.3642	32.3462	10.018	63.859	-10.9165	#N/A
343	GCK	38.9254	980.817	-4.6552	90.5669	80.4827	10.0843	77.7016	-13.1259	75.1423	51.4596	23.6827	536.973	-14.7913	83.8773	73.0349	10.8424	81.2655	-13.3441	4
344	GCSAM	5.35171	20.2256	-1.91811	47.0646	61.2483	-14.1837	281.763	-9.47982	NA	NA	NA	NA	NA	NA	NA	NA	NA	NA	1
345	GCSAML	19.7272	5.63353	1.80807	NA	NA	NA	NA	NA	NA	NA	NA	NA	NA	79.3016	68.499	10.8026	64.0746	-6.69666	#N/A
346	GDF11	8.64883	19.8365	-1.19758	33.5805	15.6381	17.9424	239.305	-6.8033	NA	NA	NA	NA	NA	NA	NA	NA	NA	NA	#N/A
347	GGT1	29.3169	465.778	-3.98984	NA	NA	NA	NA	NA	28.8167	9.38542	19.4313	356.22	-11.7364	59.8596	44.0857	15.774	176.988	-11.2362	#N/A
348	GGT5	484.396	152.786	1.66467	NA	NA	NA	NA	NA	30.7067	45.131	-14.4243	239.738	-6.46271	15.7248	49.7787	-34.0539	1379.15	-16.8446	4
349	GIPC2	17.6794	562.184	-4.9909	63.4565	41.586	21.8706	398.337	-17.0115	NA	NA	NA	NA	NA	74.8988	64.0541	10.8447	84.4455	-14.7971	3
350	GJC3	3.36502	6.83935	-1.02325	NA	NA	NA	NA	NA	75.7391	58.145	17.5942	277.701	-5.7897	NA	NA	NA	NA	NA	#N/A
351	GLT8D2	1.89825	41.371	-4.44588	43.7303	30.8913	12.839	125.185	-12.6035	77.4792	40.1875	37.2917	1338.99	-17.4912	NA	NA	NA	NA	NA	2
352	GLTPD2	15.0495	64.6146	-2.10214	70.466	58.8249	11.6411	87.2204	-6.09952	NA	NA	NA	NA	NA	88.8125	71.6875	17.125	202.259	-6.85888	#N/A
353	GLYCAM1	3685	152719	-5.37307	84.5652	59.8147	24.7505	522.002	-19.7361	84.8313	57.0071	27.8241	749.378	-18.5809	86.2935	64.9929	21.3006	360.854	-17.6899	3
354	GMDS	94.5572	292.2	-1.6277	70.8874	56.471	14.4164	143.985	-6.06942	NA	NA	NA	NA	NA	NA	NA	NA	NA	NA	6
355	GMFG	748.645	363.837	1.04099	66.7911	78.0363	-11.2451	190.578	-6.33206	16	53.75	-37.75	1499.32	-12.8107	7.07292	24.9535	-17.8806	439.027	-8.06097	#N/A
356	G015	730.915	332.637	1.13576	12.7736	27.3868	-14.6132	294.801	-7.59818	NA	NA	NA	NA	NA	NA	NA	NA	NA	NA	1
357	GOLPH3L	210.334	791.857	-1.91256	NA	NA	NA	NA	NA	NA	NA	NA	NA	NA	39.9239	25.9995	13.9244	121.628	-5.97644	1
358	GP2	31.8521	1127.67	-5.14581	NA	NA	NA	NA	NA	82.1667	67.3125	14.8542	218.237	-15.9194	73.1167	51.7656	21.351	360.373	-16.6871	#N/A
359	GPA33	3.52914	9.79728	-1.47307	NA	NA	NA	NA	NA	60.625	31.25	29.375	809.577	-8.96464	NA	NA	NA	NA	NA	1
360	GPAM	443.861	6750.22	-3.92675	87.9809	70.2675	17.7134	245.464	-11.8407	NA	NA	NA	NA	NA	NA	NA	NA	NA	NA	1
361	GPD1	45.3414	646.425	-3.83358	78.7877	57.3709	21.4168	371.102	-12.7735	60.5	25.25	35.25	1189.89	-14.9146	75.8018	37.375	38.4268	1265.93	-18.9104	3
362	GPER1	2.67521	9.81219	-1.87492	NA	NA	NA	NA	NA	NA	NA	NA	NA	NA	77.2735	67.1991	10.0744	52.501	-5.44391	#N/A
363	GPI	7044.07	2915.47	1.27268	47.4381	28.084	19.3541	285.794	-8.87162	NA	NA	NA	NA	NA	NA	NA	NA	NA	NA	#N/A
364	GPR1	4.27867	14.1056	-1.72103	68.9735	87.08	-18.1066	427.455	-11.0811	NA	NA	NA	NA	NA	NA	NA	NA	NA	NA	#N/A
365	GPR141	107.369	45.467	1.23969	26.6465	41.6216	-14.9751	307.605	-7.82599	61.3542	87.425	-26.0708	732.202	-8.57682	NA	NA	NA	NA	NA	#N/A
366	GPR158	2.85451	10.1014	-1.82325	NA	NA	NA	NA	NA	9.37341	38.1859	-28.8125	888.784	-12.086	NA	NA	NA	NA	NA	#N/A
367	GPR19	4.21096	21.8801	-2.3774	NA	NA	NA	NA	NA	NA	NA	NA	NA	NA	30.8857	15.0646	15.8212	168.382	-7.05467	2
368	GPR21	43.3446	17.3718	1.31911	87.6023	70.3435	17.2589	219.726	-8.04371	NA	NA	NA	NA	NA	NA	NA	NA	NA	NA	#N/A
369	GPR34	148.851	68.3122	1.12365	NA	NA	NA	NA	NA	29.75	53.75	-24	624.259	-7.90624	NA	NA	NA	NA	NA	#N/A
370	GPR37	2.51729	6.49703	-1.36791	NA	NA	NA	NA	NA	28.9966	14.3713	14.6253	188.428	-5.54571	NA	NA	NA	NA	NA	#N/A
371	GPR4	242.166	65.3901	1.88885	53.5984	37.9596	15.6389	176.557	-8.55478	NA	NA	NA	NA	NA	NA	NA	NA	NA	NA	3
372	GPR68	24.0753	358.786	-3.89749	57.1384	38.1513	18.987	285.596	-12.1283	NA	NA	NA	NA	NA	NA	NA	NA	NA	NA	#N/A
373	GPR82	14.9873	5.77824	1.37504	NA	NA	NA	NA	NA	39.6429	55.1057	-15.4628	271.79	-6.25703	NA	NA	NA	NA	NA	#N/A
374	GPR84	1603.27	387.857	2.04742	7.83811	24.9875	-17.1494	391.258	-9.7051	13.2292	55.5833	-42.3542	1880.31	-15.612	38.3583	69.7083	-31.35	1187.4	-15.4903	1
375	GRAMD1C	55.4717	210.089	-1.92118	38.5241	26.8822	11.642	86.5615	-5.82518	NA	NA	NA	NA	NA	NA	NA	NA	NA	NA	2
376	GRB7	59.9086	125.837	-1.07072	84.039	64.02	20.019	307.466	-7.54462	60.875	28.625	32.25	980.365	-9.77959	45.7083	21.1667	24.5417	463.228	-8.17273	5
377	GRHL1	51.3251	301.623	-2.55501	NA	NA	NA	NA	NA	NA	NA	NA	NA	NA	31.332	15.6181	15.7139	166.478	-7.37314	1
378	GSAP	1963.56	653.484	1.58725	48.2904	25.4615	22.8288	415.928	-11.2604	NA	NA	NA	NA	NA	NA	NA	NA	NA	NA	3
379	GSDMB	31.9223	77.7343	-1.28399	NA	NA	NA	NA	NA	54.2724	39.6528	14.6196	188.074	-5.4749	85.5636	68.2396	17.3239	205.364	-5.99583	#N/A
380	GSTM1_1	2.99617	34.5303	-3.52667	NA	NA	NA	NA	NA	NA	NA	NA	NA	NA	49.375	18.3861	30.9889	792.655	-14.3133	#N/A
381	GSTO1	96.7234	37.2488	1.37667	59.5693	78.8626	-19.2933	477.646	-9.90467	NA	NA	NA	NA	NA	0.5	18.4	-17.9	440.747	-8.31231	#N/A
382	GUCY2D	1	9.56759	-3.25816	77.1043	51.0392	26.0651	564.581	-13.3098	NA	NA	NA	NA	NA	NA	NA	NA	NA	NA	#N/A
383	GZMK	88.1317	43.5706	1.01631	46.1118	70.4762	-24.3645	723.514	-12.5953	91.375	77.75	13.625	161.936	-6.07829	NA	NA	NA	NA	NA	1
384	H19	59.7032	8.80628	2.7612	NA	NA	NA	NA	NA	61.3128	44.7985	16.5142	250.613	-10.8279	78.5833	62.8542	15.7292	169.466	-10.5199	#N/A
385	H1F0	233.538	1118.34	-2.25963	NA	NA	NA	NA	NA	24.8805	11.6533	13.2271	155.122	-6.56945	NA	NA	NA	NA	NA	#N/A
386	H1FNT	7.49682	874.751	-6.86645	75.2215	57.1837	18.0377	286.286	-25.2873	NA	NA	NA	NA	NA	NA	NA	NA	NA	NA	#N/A
387	HAAO	34.7168	13.127	1.4031	NA	NA	NA	NA	NA	NA	NA	NA	NA	NA	24.4955	48.2819	-23.7864	721.99	-10.7967	#N/A
388	HAPLN1	5.40694	22.0882	-2.03039	NA	NA	NA	NA	NA	28.1667	17.5	10.6667	97.9062	-5.95759	NA	NA	NA	NA	NA	#N/A
389	HCK	2209.35	519.769	2.08768	33.9551	21.1906	12.7645	110.185	-8.01146	NA	NA	NA	NA	NA	NA	NA	NA	NA	NA	2
390	HES6	8.90936	45.3799	-2.34866	53.6233	31.1395	22.4838	403.852	-9.85077	NA	NA	NA	NA	NA	NA	NA	NA	NA	NA	#N/A
391	HHIPL2	42.1989	786.375	-4.21994	80.4673	56.6438	23.8235	470.904	-14.9494	80.5082	43.5907	36.9176	1310.05	-16.6268	80.3904	59.4597	20.9307	336.746	-12.9781	#N/A
392	HID1	128.166	383.031	-1.57945	57.2035	44.6329	12.5706	103.293	-5.57959	NA	NA	NA	NA	NA	NA	NA	NA	NA	NA	2
393	HK3	2003.44	566.229	1.82302	NA	NA	NA	NA	NA	24.6	60.1611	-35.5611	1337.15	-12.3954	NA	NA	NA	NA	NA	#N/A
394	HKDC1	15.4813	6.34174	1.28758	80.2837	69.5226	10.7611	70.1674	-5.86604	81.1875	32.125	49.0625	2316.59	-20.9102	81.7891	69.4632	12.3259	88.2882	-6.04162	#N/A
395	HLX	291.049	123.901	1.23207	NA	NA	NA	NA	NA	NA	NA	NA	NA	NA	51.3393	66.3514	-15.0121	327.731	-7.21743	#N/A
396	HMGN5	38.2292	96.587	-1.33715	NA	NA	NA	NA	NA	17.25	30.4107	-13.1607	200.61	-6.39611	NA	NA	NA	NA	NA	#N/A
397	HNMT	675.14	226.971	1.57268	77.8002	60.6219	17.1783	218.166	-8.49101	NA	NA	NA	NA	NA	NA	NA	NA	NA	NA	#N/A
398	HOOK2	16.5569	58.6188	-1.82393	66.2638	48.8885	17.3753	223.828	-7.16229	NA	NA	NA	NA	NA	NA	NA	NA	NA	NA	#N/A
399	HOXA4	2.5634	7.48365	-1.54568	80.5736	44.579	35.9946	1123.27	-17.4736	70.7732	29.448	41.3252	1631.88	-13.6329	85.6014	57.2998	28.3015	640.165	-9.97606	#N/A
400	HOXA5	6.11727	13.5611	-1.14851	75.117	40.9224	34.1946	1005.01	-15.9525	74.038	35.5152	38.5228	1412.5	-12.2832	70.519	35.5859	34.9332	1018.25	-13.2637	3
401	HOXA6	9.44994	21.6886	-1.19856	22.3666	32.7396	-10.373	167.038	-6.68453	NA	NA	NA	NA	NA	76.8883	59.0516	17.8368	220.09	-6.06749	#N/A
402	HPDL	5.10593	19.945	-1.96578	NA	NA	NA	NA	NA	32.6167	20.799	11.8177	121.354	-5.9486	79.3221	51.0994	28.2227	637.547	-10.3042	#N/A
403	HPN	14.0476	184.369	-3.7142	72.4723	42.7621	29.7101	752.642	-16.4389	68.3096	26.7735	41.5361	1659.73	-16.9197	77.237	26.6542	50.5828	2273.18	-27.1276	4
404	HPSE2	4.97147	41.7834	-3.07119	52.2947	37.1554	15.1393	168.079	-8.77971	NA	NA	NA	NA	NA	NA	NA	NA	NA	NA	#N/A
405	HRH4	7.60647	2.36945	1.68268	NA	NA	NA	NA	NA	60.7917	76.2292	-15.4375	271.991	-6.64022	NA	NA	NA	NA	NA	#N/A
406	HSD11B1	67.7341	13.1269	2.36736	NA	NA	NA	NA	NA	69	41.25	27.75	724.408	-13.2182	NA	NA	NA	NA	NA	#N/A
407	HSD17B1	26.0335	8.974	1.53655	85.4778	60.5672	24.9106	504.694	-12.3599	NA	NA	NA	NA	NA	94.4583	81.5625	12.8958	99.9728	-6.61366	1
408	HSH2D	196.817	68.3803	1.5252	25.7548	54.5726	-28.8179	984.147	-15.9691	12.15	32.0451	-19.8951	437.434	-7.26435	52.7372	70.969	-18.2318	455.225	-8.57501	#N/A
409	HSPB2	6.53067	28.3975	-2.12046	41.6017	21.561	20.0407	311.264	-8.50014	NA	NA	NA	NA	NA	NA	NA	NA	NA	NA	#N/A
410	HSTN	614.977	19390.8	-4.97869	NA	NA	NA	NA	NA	64.725	48	16.725	272.108	-15.2839	82.7005	69.3448	13.3557	129.832	-14.8429	#N/A
411	HTR4	3.55921	7.84312	-1.13987	NA	NA	NA	NA	NA	76.7833	37.625	39.1583	1460.64	-12.5616	NA	NA	NA	NA	NA	#N/A
412	ICAM3	1062.77	430.455	1.30389	NA	NA	NA	NA	NA	NA	NA	NA	NA	NA	22.7538	37.1736	-14.4198	306.9	-7.1004	#N/A
413	ICAM4	34.8281	12.1534	1.51889	NA	NA	NA	NA	NA	28.012	52.8195	-24.8074	666.366	-8.45842	NA	NA	NA	NA	NA	#N/A
414	IFIT3	1198.98	395.397	1.60044	NA	NA	NA	NA	NA	3.39583	25.875	-22.4792	552.113	-7.94351	NA	NA	NA	NA	NA	#N/A
415	IFITM1	1441.79	477.04	1.59568	NA	NA	NA	NA	NA	8.11036	31.2174	-23.107	581.913	-8.09376	31.2111	54.3038	-23.0927	685.886	-10.6385	1
416	IFITM10	18.0945	47.9087	-1.40474	NA	NA	NA	NA	NA	66.3056	16.125	50.1806	2424.95	-18.1663	71.15	24.5414	46.6086	1899.9	-21.412	#N/A
417	IFITM3_1	2594.11	935.892	1.47083	NA	NA	NA	NA	NA	NA	NA	NA	NA	NA	21.5143	7.34405	14.1702	126.504	-6.80611	#N/A
418	IFITM5	9.64672	2.38646	2.01517	NA	NA	NA	NA	NA	26.0477	8.75489	17.2928	271.667	-8.86955	NA	NA	NA	NA	NA	#N/A
419	IGF1	215.045	83.6327	1.3625	NA	NA	NA	NA	NA	9.3125	23.4792	-14.1667	230.878	-6.04078	71.7815	57.8374	13.9441	121.183	-6.551	#N/A
420	IGSF5	24.7967	119.635	-2.27042	67.1788	34.5903	32.5885	909.307	-15.5099	58.9911	24.8527	34.1384	1105.79	-11.3236	NA	NA	NA	NA	NA	4
421	IGSF6	1352.27	457.148	1.56465	NA	NA	NA	NA	NA	13.5833	73.8	-60.2167	3744.64	-25.8546	53.4182	76.8091	-23.391	701.454	-10.7463	#N/A
422	IL12B	51.8714	16.1652	1.68205	NA	NA	NA	NA	NA	67.125	78	-10.875	143.243	-6.05457	NA	NA	NA	NA	NA	#N/A
423	IL18RAP	217.677	82.1396	1.40604	NA	NA	NA	NA	NA	7.4375	40.9583	-33.5208	1190.85	-11.2299	NA	NA	NA	NA	NA	#N/A
424	IL1B	2870.16	921.157	1.63961	57.3834	77.1011	-19.7177	497.203	-10.3784	NA	NA	NA	NA	NA	NA	NA	NA	NA	NA	#N/A
425	IL1RL1	5.03823	2.46941	1.02875	NA	NA	NA	NA	NA	63.5	34	29.5	816.321	-10.5492	NA	NA	NA	NA	NA	#N/A
426	IL1RN	29361.6	8423.5	1.80144	79.5897	68.0188	11.5709	85.9288	-7.01727	75	43.125	31.875	959.974	-13.2527	NA	NA	NA	NA	NA	#N/A
427	IL22RA2	95.9359	28.0947	1.77177	NA	NA	NA	NA	NA	78.8458	93.5625	-14.7167	249.215	-6.66212	NA	NA	NA	NA	NA	#N/A
428	IL2RA	354.228	172.14	1.04109	NA	NA	NA	NA	NA	52.3175	65.5056	-13.1882	201.379	-5.58327	NA	NA	NA	NA	NA	3
429	IL2RB	408.313	1126.72	-1.46438	NA	NA	NA	NA	NA	25.75	53.375	-27.625	818.43	-10.8344	11.6786	31.5913	-19.9127	528.531	-10.6288	#N/A
430	IL33	11.6327	36.6655	-1.65624	NA	NA	NA	NA	NA	81.6292	70.5694	11.0597	104.427	-5.45145	NA	NA	NA	NA	NA	2
431	IL34	6.27662	16.7765	-1.41839	71.4826	42.1903	29.2924	718.986	-12.5842	55.1875	20.25	34.9375	1156.57	-10.8828	NA	NA	NA	NA	NA	11
432	IL3RA	78.2152	19.2613	2.02174	66.7219	78.08	-11.3581	196.994	-7.56277	15	34.9152	-19.9152	440.177	-7.95999	3.03897	14.5224	-11.4834	215.582	-7.27918	#N/A
433	IL6	6.41008	2.61391	1.29413	48.0387	59.9214	-11.8827	209.189	-6.75511	NA	NA	NA	NA	NA	NA	NA	NA	NA	NA	#N/A
434	IRF6	133.99	575.247	-2.10206	NA	NA	NA	NA	NA	NA	NA	NA	NA	NA	52.0282	32.2326	19.7956	284.628	-7.50786	2
435	IRS1	165.27	1127.93	-2.77078	NA	NA	NA	NA	NA	66.4734	54.3537	12.1198	131.586	-7.52587	73.5655	62.8884	10.6771	65.2531	-7.20678	#N/A
436	ISG15	757.005	222.238	1.7682	NA	NA	NA	NA	NA	NA	NA	NA	NA	NA	30.4776	17.1003	13.3774	110.529	-7.20035	#N/A
437	ISY01	92.2264	44.4288	1.05368	54.4403	29.731	24.7093	494.32	-11.2964	NA	NA	NA	NA	NA	NA	NA	NA	NA	NA	2
438	ITGA7	14.7799	95.4571	-2.69122	NA	NA	NA	NA	NA	NA	NA	NA	NA	NA	70.6991	46.7225	23.9766	444.885	-9.74669	1
439	ITGAE	101.889	342.246	-1.74803	90.1193	78.3825	11.7367	87.7182	-5.60931	57.9942	76.1492	-18.155	367.674	-8.31186	NA	NA	NA	NA	NA	#N/A
440	ITGAM	5032.64	1906.97	1.40003	NA	NA	NA	NA	NA	NA	NA	NA	NA	NA	53.8617	73.1408	-19.2791	500.474	-8.84995	1
441	ITGAX	2750.08	939.642	1.54929	44.8831	61.4922	-16.6091	368.368	-8.81041	20	44.5	-24.5	650.725	-8.40635	55.4833	72.8534	-17.3701	419.39	-8.29391	#N/A
442	ITK	328.626	1003.74	-1.61087	NA	NA	NA	NA	NA	90.1875	72.75	17.4375	273.887	-6.20628	NA	NA	NA	NA	NA	#N/A
443	KANK4	4.42689	11.3262	-1.3553	54.4984	65.1095	-10.6111	173.581	-6.99019	NA	NA	NA	NA	NA	NA	NA	NA	NA	NA	#N/A
444	KCNJ16	60.1581	23.6254	1.34842	NA	NA	NA	NA	NA	53.2991	65.5268	-12.2277	175.962	-5.75987	77.1684	63.4808	13.6876	115.612	-6.46223	1
445	KCNK5	45.643	235.649	-2.36817	NA	NA	NA	NA	NA	NA	NA	NA	NA	NA	73.0675	51.4314	21.6361	350.81	-8.43831	17
446	KCNQ2	2.09222	7.83892	-1.90562	NA	NA	NA	NA	NA	NA	NA	NA	NA	NA	71.9398	61.4742	10.4655	58.2654	-5.52538	#N/A
447	KCP	154.362	49.7377	1.63391	66.285	83.0039	-16.7189	372.872	-8.95421	45.8663	76.8866	-31.0203	1025.46	-10.5071	NA	NA	NA	NA	NA	#N/A
448	KCTD14	12.6017	46.5254	-1.8844	NA	NA	NA	NA	NA	25.0197	12.1409	12.8788	145.248	-5.93012	NA	NA	NA	NA	NA	#N/A
449	KDF1	11.8245	44.9286	-1.92585	61.7986	50.9033	10.8954	73.4979	-5.70293	NA	NA	NA	NA	NA	NA	NA	NA	NA	NA	#N/A
450	KIR2DL5A	9.41881	124.303	-3.72218	82.3928	59.0435	23.3493	447.108	-13.2284	78.625	39.5	39.125	1469.9	-15.9882	85.1875	53.375	31.8125	840.735	-15.1909	#N/A
451	KIR2DS1	25.0505	122.779	-2.29315	NA	NA	NA	NA	NA	68.4033	45.4339	22.9694	489.337	-8.16537	80.3958	60.7917	19.6042	279.034	-7.74997	#N/A
452	KIR3DL2	3.50298	20.3237	-2.53651	NA	NA	NA	NA	NA	72	56.5	15.5	217.33	-7.34425	68.826	57.692	11.134	71.2652	-6.72412	#N/A
453	KIR3DS1	9.70962	28.7658	-1.56687	61.4767	47.1711	14.3056	141.182	-5.97664	NA	NA	NA	NA	NA	61.7222	47.25	14.4722	132.75	-5.64118	#N/A
454	KLF17	155.869	28.3348	2.45969	90.4942	79.8752	10.619	72.5828	-8.32056	NA	NA	NA	NA	NA	NA	NA	NA	NA	NA	#N/A
455	KLF9	51.7598	215.682	-2.059	NA	NA	NA	NA	NA	NA	NA	NA	NA	NA	75.9965	63.9243	12.0723	85.2766	-5.93714	5
456	KLHDC7A	36.8908	336.875	-3.19088	NA	NA	NA	NA	NA	73.8842	47.4763	26.4079	657.226	-10.7335	NA	NA	NA	NA	NA	#N/A
457	KLHDC9	2.9661	10.6882	-1.84938	NA	NA	NA	NA	NA	NA	NA	NA	NA	NA	73.875	46.4792	27.3958	596.172	-9.83028	#N/A
458	KLHL21	311.892	650.719	-1.06099	NA	NA	NA	NA	NA	NA	NA	NA	NA	NA	61.8893	31.6118	30.2775	742.781	-10.7215	3
459	KLHL38	4.00801	8.35551	-1.05984	NA	NA	NA	NA	NA	85.3939	67.3542	18.0398	292.796	-5.88932	NA	NA	NA	NA	NA	#N/A
460	KLRC1	9.10297	49.0952	-2.43117	NA	NA	NA	NA	NA	78.75	67.5417	11.2083	110.393	-6.72501	NA	NA	NA	NA	NA	#N/A
461	KRT10	1.39322	6.1908	-2.1517	81.6444	65.0569	16.5874	202.228	-7.35802	NA	NA	NA	NA	NA	NA	NA	NA	NA	NA	#N/A
462	KRT14	2.84353	6.08024	-1.09645	85.1938	71.4066	13.7872	128.106	-5.46117	NA	NA	NA	NA	NA	NA	NA	NA	NA	NA	#N/A
463	KRT15	58.2946	201.962	-1.79265	80.1642	59.8171	20.3471	320.918	-8.21551	66.5917	32.1182	34.4735	1126.34	-10.9412	78.7576	61.8382	16.9194	195.39	-6.39171	1
464	KRT19	435.41	3790	-3.12175	71.4174	41.6211	29.7963	753.461	-15.0894	NA	NA	NA	NA	NA	29.9112	10.9243	18.9869	263.218	-9.28922	#N/A
465	KRTCAP3	14.4517	121.453	-3.07109	85.9251	59.8719	26.0532	562.891	-12.8878	70.1196	23.2699	46.8496	2115.07	-17.9213	77.9821	21.3185	56.6637	2884.19	-31.3919	#N/A
466	KYAT1	69.2381	34.4876	1.00549	83.7417	55.0076	28.7341	689.112	-13.7825	NA	NA	NA	NA	NA	24.5	7	17.5	210.436	-6.96739	#N/A
467	KYNU	159.103	73.7997	1.10828	19.5188	39.0223	-19.5036	486.112	-9.81576	NA	NA	NA	NA	NA	NA	NA	NA	NA	NA	#N/A
468	L3HYPDH	4.80585	9.8228	-1.03134	NA	NA	NA	NA	NA	NA	NA	NA	NA	NA	76.1088	54.3241	21.7847	352.192	-7.15882	1
469	LAD1	96.3327	198.935	-1.0462	NA	NA	NA	NA	NA	NA	NA	NA	NA	NA	74.5932	57.837	16.7562	188.981	-5.71509	4
470	LALBA	3272.59	108693	-5.05369	NA	NA	NA	NA	NA	83.2083	48.1875	35.0208	1184.7	-19.0142	79.875	65.375	14.5	155.484	-15.2601	#N/A
471	LAMB3	230.922	73.7919	1.64587	73.2562	87.3686	-14.1124	279.476	-7.91998	NA	NA	NA	NA	NA	NA	NA	NA	NA	NA	4
472	LARGE2	20.2186	51.5465	-1.35019	67.4763	34.4087	33.0677	935.304	-15.1487	NA	NA	NA	NA	NA	NA	NA	NA	NA	NA	2
473	LBP	21.2835	146.63	-2.78437	79.4881	64.1892	15.2989	170.541	-8.16296	71.3171	30.2625	41.0546	1615.11	-14.7761	81.1232	66.5763	14.547	139.418	-7.6687	1
474	LCN2	26.3745	271.895	-3.36583	NA	NA	NA	NA	NA	5.09066	19.0357	-13.9451	232.31	-11.7121	NA	NA	NA	NA	NA	#N/A
475	LDLRAD1	1.59817	10.1249	-2.66341	NA	NA	NA	NA	NA	75.8	50.575	25.225	595.47	-9.32177	NA	NA	NA	NA	NA	#N/A
476	LGALS1	3757.05	1492.18	1.33218	26.6225	43.2223	-16.5998	367.321	-8.5905	NA	NA	NA	NA	NA	49.9523	34.7985	15.1537	148.939	-6.81646	#N/A
477	LGALS7	3.35932	7.08168	-1.07592	NA	NA	NA	NA	NA	68.8611	24.7938	44.0674	1859.72	-14.89	72.0625	39.1458	32.9167	893.547	-12.1099	#N/A
478	LGI3	2.63808	10.648	-2.01302	NA	NA	NA	NA	NA	NA	NA	NA	NA	NA	87.7939	75.9567	11.8373	80.9117	-5.83596	#N/A
479	LHB	3.33139	9.73989	-1.54778	70.1186	47.0977	23.0209	422.713	-9.16675	NA	NA	NA	NA	NA	NA	NA	NA	NA	NA	#N/A
480	LMAN1L	4.78739	18.4711	-1.94796	NA	NA	NA	NA	NA	80.5536	38.95	41.6036	1655.72	-14.0012	80.4392	58.1098	22.3294	375.382	-8.05207	#N/A
481	LMOD3	4.36802	9.03602	-1.04871	NA	NA	NA	NA	NA	NA	NA	NA	NA	NA	74.8333	89.7667	-14.9333	323.828	-7.81971	#N/A
482	LNX1	45.5875	119.521	-1.39055	80.254	55.6691	24.585	488.912	-9.84037	76.8861	39.9796	36.9065	1294.21	-11.6536	NA	NA	NA	NA	NA	5
483	LOC100138951	134.631	34.2458	1.97501	NA	NA	NA	NA	NA	10.7524	48.792	-38.0396	1524.91	-13.5848	11.775	55.7	-43.925	2210.1	-24.5416	#N/A
484	LOC100139209	448.285	117.941	1.92634	83.9583	66.3611	17.5972	231.974	-9.44144	NA	NA	NA	NA	NA	NA	NA	NA	NA	NA	#N/A
485	LOC100139670	3997.28	1123.28	1.8313	NA	NA	NA	NA	NA	3.39583	25.875	-22.4792	552.973	-8.23744	NA	NA	NA	NA	NA	#N/A
486	LOC100139916	2.04939	69.3035	-5.07966	NA	NA	NA	NA	NA	NA	NA	NA	NA	NA	93.4301	77.1848	16.2452	198.79	-15.5512	#N/A
487	LOC100140174	1.39322	8.78512	-2.65664	NA	NA	NA	NA	NA	55.875	37.25	18.625	318.604	-8.01818	NA	NA	NA	NA	NA	#N/A
488	LOC100196897	3.41504	8.34472	-1.28896	NA	NA	NA	NA	NA	21.8333	48.0417	-26.2083	739.035	-9.97765	33.6625	50.4929	-16.8304	396.108	-8.93345	#N/A
489	LOC100196898	3.93725	10.0056	-1.34555	NA	NA	NA	NA	NA	NA	NA	NA	NA	NA	53.5331	33.4688	20.0643	291.31	-6.77768	#N/A
490	LOC100295712	3.20732	6.53941	-1.02779	69.7803	46.7497	23.0305	421.925	-8.89476	77.2083	60.5417	16.6667	247.7	-5.62817	NA	NA	NA	NA	NA	#N/A
491	LOC100296618	2.21921	7.95367	-1.84157	NA	NA	NA	NA	NA	63.05	29.5417	33.5083	1062.73	-10.632	62.5065	31.9612	30.5454	759.491	-11.2502	#N/A
492	LOC100296901	16.8093	4.54279	1.88761	NA	NA	NA	NA	NA	NA	NA	NA	NA	NA	72.9321	61.4597	11.4723	75.2384	-7.01012	#N/A
493	LOC100297152	24.7007	87.2016	-1.8198	73.8629	62.5476	11.3153	80.3524	-5.62587	NA	NA	NA	NA	NA	NA	NA	NA	NA	NA	#N/A
494	LOC100297399	2.11838	20.738	-3.29125	79.535	51.1049	28.4301	681.803	-14.6579	70.3438	27.9583	42.3854	1726.54	-16.2938	NA	NA	NA	NA	NA	#N/A
495	LOC100297676	10100.6	4653.17	1.11815	64.1608	38.4285	25.7323	540.946	-12.0266	NA	NA	NA	NA	NA	NA	NA	NA	NA	NA	#N/A
496	LOC100298823	2.95662	6.61609	-1.16203	NA	NA	NA	NA	NA	50.75	20.625	30.125	852.045	-9.06459	60.375	39.5	20.875	319.164	-6.91636	#N/A
497	LOC100299277	8.00605	17.7271	-1.1468	NA	NA	NA	NA	NA	NA	NA	NA	NA	NA	61.5735	46.7054	14.8682	140.94	-5.35722	#N/A
498	LOC100299732	3.53633	7.49862	-1.08437	88.0812	74.8484	13.2327	115.884	-5.31474	NA	NA	NA	NA	NA	NA	NA	NA	NA	NA	#N/A
499	LOC100300051	15.4994	7.60871	1.02649	41.7597	66.389	-24.6294	737.846	-12.7705	NA	NA	NA	NA	NA	NA	NA	NA	NA	NA	#N/A
500	LOC100300091	1.20495	11.524	-3.2576	NA	NA	NA	NA	NA	NA	NA	NA	NA	NA	69.4792	41.2292	28.25	645.304	-12.5063	#N/A
501	LOC100300483	23.6628	2.67566	3.14465	NA	NA	NA	NA	NA	NA	NA	NA	NA	NA	72.6342	85.757	-13.1228	272.002	-10.1306	#N/A
502	LOC100335340	8.85378	17.7739	-1.00539	72.5651	51.9755	20.5896	327.659	-7.7619	NA	NA	NA	NA	NA	NA	NA	NA	NA	NA	#N/A
503	LOC100336589	761.097	206.423	1.88247	75.5358	65.5152	10.0207	60.5571	-6.78328	28.5833	48.75	-20.1667	450.152	-7.79367	29.4167	65.3333	-35.9167	1521.64	-18.2866	#N/A
504	LOC100336869	8.06114	68.1891	-3.08049	70.1875	60.1863	10.0012	64.7363	-7.9041	84.7083	73.625	11.0833	111.233	-8.23159	NA	NA	NA	NA	NA	#N/A
505	LOC100336941	798.576	256.589	1.63797	NA	NA	NA	NA	NA	39.0625	20.4	18.6625	316.817	-8.32868	NA	NA	NA	NA	NA	#N/A
506	LOC100337044	32.6981	13.2585	1.30229	NA	NA	NA	NA	NA	16.375	58	-41.625	1814.97	-14.6954	44.799	33.9502	10.8488	63.0773	-5.76271	#N/A
507	LOC100337081	54.5045	18.7052	1.54294	NA	NA	NA	NA	NA	19.3125	69.625	-50.3125	2630.99	-19.4484	79.9152	65.5191	14.3961	131.822	-7.00356	#N/A
508	LOC100337168	3.35754	22.8221	-2.76495	NA	NA	NA	NA	NA	45.2917	67.0556	-21.7639	522.906	-12.0557	90.4167	78.3056	12.1111	89.1854	-7.31958	#N/A
509	LOC100616526	2.38133	6.83307	-1.52077	NA	NA	NA	NA	NA	25.6222	9.09524	16.527	244.441	-5.96777	NA	NA	NA	NA	NA	#N/A
510	LOC100847171	1784.24	495.527	1.84828	NA	NA	NA	NA	NA	30.0267	13.6693	16.3574	241.279	-8.23374	NA	NA	NA	NA	NA	#N/A
511	LOC100847256	20.204	6.30331	1.68046	NA	NA	NA	NA	NA	55.856	69.7921	-13.9361	225.02	-6.41651	74.6738	64.4188	10.255	55.3901	-6.32835	#N/A
512	LOC100847412	1.48635	8.63183	-2.53789	NA	NA	NA	NA	NA	76.55	48.85	27.7	721.127	-9.71961	89.5267	78.3368	11.1899	72.1793	-6.73205	#N/A
513	LOC100847574	23.0294	201.11	-3.12643	NA	NA	NA	NA	NA	NA	NA	NA	NA	NA	69.6667	40.5	29.1667	691.564	-12.588	#N/A
514	LOC100847738	2.19306	18.2014	-3.05303	91.85	72	19.85	309.162	-10.1448	NA	NA	NA	NA	NA	NA	NA	NA	NA	NA	#N/A
515	LOC100847835	38.1787	6.85839	2.47682	83.9395	56.0875	27.852	649.186	-16.7969	81.9917	38.5	43.4917	1816.43	-21.2411	NA	NA	NA	NA	NA	#N/A
516	LOC100847890	194.561	439.49	-1.17561	NA	NA	NA	NA	NA	46.3431	12.0416	34.3015	1113.19	-10.5608	75.875	30.5	45.375	1793.41	-20.4475	#N/A
517	LOC100847995	2.9733	10.3501	-1.79951	NA	NA	NA	NA	NA	NA	NA	NA	NA	NA	45.8394	32.0546	13.7848	118.221	-5.79987	#N/A
518	LOC100848105	72.3082	23.0191	1.65133	88.886	72.3216	16.5644	200.807	-8.40176	82.7595	61.748	21.0115	405.581	-9.00283	NA	NA	NA	NA	NA	#N/A
519	LOC100848238	3.29803	135.514	-5.36069	87.0148	71.7366	15.2782	190.231	-16.8293	95.875	58	37.875	1390.43	-21.1743	88.5775	78.5508	10.0267	76.0679	-16.5264	#N/A
520	LOC100848324	9.14539	73.5993	-3.00858	26.8928	13.1004	13.7924	135.506	-8.3277	NA	NA	NA	NA	NA	NA	NA	NA	NA	NA	#N/A
521	LOC100848368	17.8224	3.64312	2.29044	NA	NA	NA	NA	NA	17.85	64.35	-46.5	2257.71	-17.9685	17.6455	69.4286	-51.7831	3011.38	-32.0131	#N/A
522	LOC100848419	244.547	103.928	1.23452	67.1358	77.2484	-10.1126	161.207	-6.16333	17.9167	67.7917	-49.875	2585.38	-19.1052	45.8574	63.9343	-18.0769	447.774	-8.26059	#N/A
523	LOC100848495	3.05745	8.54697	-1.48308	63.0146	79.7753	-16.7608	373.087	-9.90386	NA	NA	NA	NA	NA	13.5312	50.25	-36.7188	1582.48	-21.4672	#N/A
524	LOC100848507	20.1208	62.1782	-1.62772	NA	NA	NA	NA	NA	39.1537	14.3518	24.8019	570.97	-7.77552	NA	NA	NA	NA	NA	#N/A
525	LOC100848610	1.84594	17.242	-3.2235	75.8641	57.8062	18.0579	251.238	-9.95403	79.9783	50.4539	29.5244	825.8	-11.6089	NA	NA	NA	NA	NA	#N/A
526	LOC100848995	10.0408	28.4041	-1.50023	NA	NA	NA	NA	NA	48.729	31.4792	17.2497	267.42	-6.06494	NA	NA	NA	NA	NA	#N/A
527	LOC100849009	2.52827	9.6804	-1.93692	43.5462	55.2945	-11.7483	206.455	-8.45882	NA	NA	NA	NA	NA	NA	NA	NA	NA	NA	#N/A
528	LOC100849046	55.878	118.9	-1.0894	NA	NA	NA	NA	NA	85.625	63.125	22.5	465.168	-6.85569	NA	NA	NA	NA	NA	#N/A
529	LOC100850659	7.7545	72.8076	-3.23098	73.5188	57.8474	15.6714	182.762	-9.30791	64.375	54.25	10.125	93.6406	-8.60087	NA	NA	NA	NA	NA	#N/A
530	LOC100852061	1	11.0776	-3.46957	59.3125	48.2571	11.0554	84.0773	-9.09457	NA	NA	NA	NA	NA	NA	NA	NA	NA	NA	#N/A
531	LOC100852077	377.386	91.9151	2.03767	71.0151	56.2055	14.8095	156.094	-8.59056	NA	NA	NA	NA	NA	NA	NA	NA	NA	NA	#N/A
532	LOC101902029	5.6964	17.9801	-1.65828	37.2827	48.8131	-11.5303	199.369	-7.83382	NA	NA	NA	NA	NA	NA	NA	NA	NA	NA	#N/A
533	LOC101902048	717.155	99.0192	2.85651	82.0223	70.5623	11.46	89.1591	-9.70401	NA	NA	NA	NA	NA	NA	NA	NA	NA	NA	#N/A
534	LOC101902145	4.41021	13.8377	-1.64968	NA	NA	NA	NA	NA	NA	NA	NA	NA	NA	52.5631	38.3063	14.2568	128.113	-5.69468	#N/A
535	LOC101902219	3.66132	37.7206	-3.36492	50.5891	65.7509	-15.1618	322.585	-14.0288	NA	NA	NA	NA	NA	NA	NA	NA	NA	NA	#N/A
536	LOC101902283	4.63475	12.564	-1.43874	NA	NA	NA	NA	NA	66.4938	45.4722	21.0216	404.424	-6.72923	NA	NA	NA	NA	NA	#N/A
537	LOC101902537	4.40515	13.0148	-1.56289	NA	NA	NA	NA	NA	71.438	45.592	25.846	621.676	-7.99545	NA	NA	NA	NA	NA	#N/A
538	LOC101902551	3.2064	23.1321	-2.85087	90.4055	80.3918	10.0136	63.6291	-7.34051	72.5667	37.2623	35.3044	1187.34	-12.6467	66.9478	28.6382	38.3096	1251.35	-16.755	#N/A
539	LOC101902797	3.35184	10.5225	-1.65046	NA	NA	NA	NA	NA	84.5625	41.25	43.3125	1796.6	-14.6134	NA	NA	NA	NA	NA	#N/A
540	LOC101902869	14.0621	6.0439	1.21826	58.7512	76.8943	-18.1431	428.358	-9.20895	35.875	47.1667	-11.2917	151.792	-5.50294	NA	NA	NA	NA	NA	#N/A
541	LOC101903205	33.7686	778.42	-4.5268	24.5534	10.0714	14.482	162.533	-13.1819	NA	NA	NA	NA	NA	NA	NA	NA	NA	NA	#N/A
542	LOC101903326	14.7565	32.493	-1.13878	49.292	31.2388	18.0531	242.615	-6.81086	NA	NA	NA	NA	NA	36.152	17.9968	18.1552	229.494	-6.11565	#N/A
543	LOC101903434	2.25584	6.9032	-1.6136	89.2416	76.4701	12.7715	107.476	-5.66061	NA	NA	NA	NA	NA	NA	NA	NA	NA	NA	#N/A
544	LOC101903546	345.098	108.842	1.66477	NA	NA	NA	NA	NA	NA	NA	NA	NA	NA	71.2456	83.0358	-11.7901	223.167	-6.80724	#N/A
545	LOC101903713	8.56267	4.23441	1.0159	NA	NA	NA	NA	NA	91.375	76.8056	14.5694	186.763	-6.2561	85.6875	53.9583	31.7292	824.464	-13.3696	#N/A
546	LOC101904078	2.28049	5.86758	-1.36342	64.8634	41.8825	22.981	420.596	-9.0202	76.5312	42.6979	33.8333	1082.61	-10.4417	NA	NA	NA	NA	NA	#N/A
547	LOC101904098	65.3039	31.7488	1.04047	60.4485	85.3508	-24.9023	752.768	-12.9543	NA	NA	NA	NA	NA	NA	NA	NA	NA	NA	#N/A
548	LOC101904166	128.511	42.0819	1.61061	NA	NA	NA	NA	NA	NA	NA	NA	NA	NA	88.6955	78.1954	10.5002	58.7391	-6.23982	#N/A
549	LOC101904248	67.1478	23.9042	1.49008	34.335	22.0647	12.2703	97.9775	-6.6107	NA	NA	NA	NA	NA	NA	NA	NA	NA	NA	#N/A
550	LOC101904258	5.28145	13.0402	-1.30396	69.7978	47.9321	21.8657	376.035	-8.46279	35.5417	19.9583	15.5833	215.39	-5.63062	NA	NA	NA	NA	NA	#N/A
551	LOC101904357	65.682	32.7838	1.00252	NA	NA	NA	NA	NA	NA	NA	NA	NA	NA	27.375	11.975	15.4	154.103	-6.35216	#N/A
552	LOC101904397	4.85943	131.058	-4.75327	72.096	51.3283	20.7676	354.599	-15.6878	80.0417	39.6042	40.4375	1580.26	-19.6803	NA	NA	NA	NA	NA	#N/A
553	LOC101904548	16.6596	5.36562	1.63454	NA	NA	NA	NA	NA	71.7708	91.8125	-20.0417	443.943	-7.42686	74.125	88.125	-14	293.482	-7.33753	#N/A
554	LOC101904550	2.74839	9.34861	-1.76616	NA	NA	NA	NA	NA	NA	NA	NA	NA	NA	57.4333	33.2222	24.2111	450.897	-8.49678	#N/A
555	LOC101904563	59.2501	5.73559	3.3688	67.7375	49.8529	17.8846	248.797	-13.9616	NA	NA	NA	NA	NA	NA	NA	NA	NA	NA	#N/A
556	LOC101904614	1	23.4495	-4.55148	NA	NA	NA	NA	NA	43.8429	63.4902	-19.6473	443.769	-18.4547	NA	NA	NA	NA	NA	#N/A
557	LOC101904622	9.55258	20.1958	-1.08009	NA	NA	NA	NA	NA	36.4684	53.93	-17.4616	339.963	-6.99088	NA	NA	NA	NA	NA	#N/A
558	LOC101904698	4.04884	17.1826	-2.08537	NA	NA	NA	NA	NA	21.3565	55.8704	-34.5139	1261.65	-15.2852	NA	NA	NA	NA	NA	#N/A
559	LOC101904744	5.0631	10.2759	-1.02117	66.1789	49.7082	16.4707	195.702	-6.20667	NA	NA	NA	NA	NA	NA	NA	NA	NA	NA	#N/A
560	LOC101904757	3.00565	7.73461	-1.36365	NA	NA	NA	NA	NA	85.7181	70.851	14.8671	195.086	-5.57563	81.7083	65.0583	16.65	186.753	-5.89704	#N/A
561	LOC101904759	6.03276	17.5462	-1.54027	85.3028	66.6128	18.69	263.776	-7.32696	61.75	25.875	35.875	1221.5	-11.3062	NA	NA	NA	NA	NA	#N/A
562	LOC101904831	6.90991	35.6041	-2.36531	NA	NA	NA	NA	NA	NA	NA	NA	NA	NA	80.5087	70.3767	10.132	55.2557	-6.29411	#N/A
563	LOC101905017	2.88964	10.2141	-1.8216	NA	NA	NA	NA	NA	NA	NA	NA	NA	NA	93	71.25	21.75	352.924	-7.72077	#N/A
564	LOC101905041	625.968	299.203	1.06497	NA	NA	NA	NA	NA	NA	NA	NA	NA	NA	22.2227	35.2383	-13.0156	259.206	-6.50208	#N/A
565	LOC101905099	3.58094	7.35394	-1.03818	69.866	52.6929	17.1731	215.841	-6.45024	NA	NA	NA	NA	NA	NA	NA	NA	NA	NA	#N/A
566	LOC101905151	26.5128	215.707	-3.02431	NA	NA	NA	NA	NA	50.7907	39.0809	11.7098	123.992	-8.12033	36.7565	24.1082	12.6482	100.648	-8.00097	#N/A
567	LOC101905165	2.59725	10.3927	-2.00052	79.452	56.1458	23.3061	435.97	-9.74939	67.5	20.2778	47.2222	2144.29	-16.7774	43.6667	25	18.6667	247.679	-7.07262	#N/A
568	LOC101905166	12.0277	125.177	-3.37954	59.2667	29.2703	29.9965	766.026	-15.7784	70.9824	31.607	39.3754	1486.74	-15.2499	78.3853	49.5946	28.7907	673.634	-13.0139	#N/A
569	LOC101905198	3.68155	36.4186	-3.30629	76.9266	63.856	13.0707	121.53	-8.94685	72.3766	54.0937	18.283	310.315	-9.51334	68.7737	32.1579	36.6159	1137.42	-16.6297	#N/A
570	LOC101905267	39.3244	17.3529	1.18025	NA	NA	NA	NA	NA	73.4163	58.2458	15.1705	203.902	-6.63421	66.6699	54.1606	12.5093	91.433	-5.91045	#N/A
571	LOC101905499	651.703	209.976	1.63399	NA	NA	NA	NA	NA	NA	NA	NA	NA	NA	77.6591	64.2179	13.4412	111.358	-6.93748	#N/A
572	LOC101905509	2.32332	8.48753	-1.86916	NA	NA	NA	NA	NA	73.2422	50.2493	22.9929	488.73	-7.58624	NA	NA	NA	NA	NA	#N/A
573	LOC101905672	4.16443	39.9164	-3.26079	82.0385	58.8989	23.1395	435.325	-11.9353	84.4229	44.8438	39.5792	1501.69	-15.0685	NA	NA	NA	NA	NA	#N/A
574	LOC101905711	38.9723	5.35293	2.86405	NA	NA	NA	NA	NA	51.2545	68.8632	-17.6086	353.594	-9.30254	NA	NA	NA	NA	NA	#N/A
575	LOC101905776	17.3152	5.26556	1.71738	46.066	68.8814	-22.8153	644.78	-12.1615	14.3496	38.3883	-24.0387	628.053	-8.477	NA	NA	NA	NA	NA	#N/A
576	LOC101905845	6.30027	14.429	-1.19548	NA	NA	NA	NA	NA	77.9241	43.7759	34.1482	1103.03	-10.5067	55.875	16.125	39.75	1348.81	-16.3173	#N/A
577	LOC101905905	2.57288	8.83405	-1.77969	NA	NA	NA	NA	NA	NA	NA	NA	NA	NA	79.1455	67.6161	11.5295	74.7714	-5.45832	#N/A
578	LOC101906018	2.79122	6.81178	-1.28713	NA	NA	NA	NA	NA	34.783	20.3331	14.4499	183.469	-5.45391	NA	NA	NA	NA	NA	#N/A
579	LOC101906101	228.285	34.3606	2.73201	NA	NA	NA	NA	NA	70.5824	82.6049	-12.0225	176.646	-8.29049	NA	NA	NA	NA	NA	#N/A
580	LOC101906195	6.30974	15.526	-1.29904	NA	NA	NA	NA	NA	63.7017	42.7855	20.9162	399.862	-6.60557	NA	NA	NA	NA	NA	#N/A
581	LOC101906248	20.8563	8.47645	1.29895	86.195	71.351	14.844	154.26	-7.09502	9.125	38.375	-29.25	914.303	-9.62174	84.1806	69.0709	15.1096	147.775	-6.74615	#N/A
582	LOC101906317	714.786	191.883	1.89728	NA	NA	NA	NA	NA	1.5	34.375	-32.875	1148.5	-11.455	5.75	18.875	-13.125	265.432	-7.4686	#N/A
583	LOC101906392	2.83733	7.30703	-1.36475	46.8622	20.8613	26.0009	553.371	-10.5893	NA	NA	NA	NA	NA	NA	NA	NA	NA	NA	#N/A
584	LOC101906441	12.4765	5.30168	1.23469	NA	NA	NA	NA	NA	NA	NA	NA	NA	NA	79.9208	61.6294	18.2915	234.531	-7.59798	#N/A
585	LOC101906451	4.59762	15.9322	-1.79298	NA	NA	NA	NA	NA	86.4797	66.3041	20.1756	372.224	-6.90189	86.5774	59.7319	26.8455	569.477	-9.54609	#N/A
586	LOC101906512	3.80307	23.2555	-2.61234	79.3753	57.5236	21.8518	380.231	-10.0212	68.8958	37.875	31.0208	910.162	-10.805	NA	NA	NA	NA	NA	#N/A
587	LOC101906559	19.1081	6.09512	1.64845	54.7423	65.3027	-10.5604	174.027	-6.76928	NA	NA	NA	NA	NA	NA	NA	NA	NA	NA	#N/A
588	LOC101906603	31.2402	10.8898	1.52043	NA	NA	NA	NA	NA	10.75	51.375	-40.625	1731.5	-14.3321	17.3825	51.008	-33.6255	1347.05	-16.4658	#N/A
589	LOC101906836	271.937	134.927	1.01109	NA	NA	NA	NA	NA	23.7689	59.9521	-36.1832	1380.43	-12.1216	17.317	58.7688	-41.4518	1980.76	-22.1702	#N/A
590	LOC101907132	49.7416	10.822	2.20049	61.9306	80.3637	-18.4331	444.071	-10.5277	16.2941	43.9462	-27.6521	823.753	-10.1682	NA	NA	NA	NA	NA	#N/A
591	LOC101907174	6.67311	41.8115	-2.64747	NA	NA	NA	NA	NA	NA	NA	NA	NA	NA	72.256	59.4186	12.8375	102.289	-7.13828	#N/A
592	LOC101907247	3.84062	26.3135	-2.77639	66.2628	53.64	12.6228	109.204	-7.56311	NA	NA	NA	NA	NA	65.7369	51.6486	14.0883	129.03	-7.58465	#N/A
593	LOC101907275	78.7358	23.6001	1.73823	85.3268	66.1661	19.1607	280.855	-9.71521	84.8333	69.625	15.2083	206.772	-7.72074	NA	NA	NA	NA	NA	#N/A
594	LOC101907320	3.85159	9.67618	-1.32898	NA	NA	NA	NA	NA	NA	NA	NA	NA	NA	71.6557	56.8315	14.8241	140.299	-5.48249	#N/A
595	LOC101907327	15.4259	45.9542	-1.57484	NA	NA	NA	NA	NA	19.9588	9.46755	10.4912	93.0197	-5.30461	NA	NA	NA	NA	NA	#N/A
596	LOC101907369	1.80311	8.09405	-2.16637	NA	NA	NA	NA	NA	67.083	50.2831	16.7999	255.207	-6.84598	NA	NA	NA	NA	NA	#N/A
597	LOC101907661	20.3983	6.13105	1.73424	NA	NA	NA	NA	NA	24.5909	55.9804	-31.3894	1049.56	-10.7392	NA	NA	NA	NA	NA	#N/A
598	LOC101907683	2.50212	7.04992	-1.49446	86.4211	68.0538	18.3673	253.313	-7.1692	83.8614	55.8739	27.9875	732.687	-8.5531	NA	NA	NA	NA	NA	#N/A
599	LOC101907799	32.8054	9.93499	1.72334	NA	NA	NA	NA	NA	71.2836	34.2661	37.0175	1304.15	-15.3858	NA	NA	NA	NA	NA	#N/A
600	LOC101907857	64.4862	27.7841	1.21473	NA	NA	NA	NA	NA	16.5692	38.816	-22.2468	540.078	-7.5114	NA	NA	NA	NA	NA	#N/A
601	LOC101907931	3.92058	18.0631	-2.20391	61.71	48.4829	13.2271	119.112	-6.5761	73.2077	44.1373	29.0703	794.825	-9.59315	NA	NA	NA	NA	NA	#N/A
602	LOC101907943	69.5348	20.5378	1.75946	63.2269	74.4717	-11.2447	192.792	-7.12065	60.6746	50.2191	10.4555	93.9339	-6.85788	NA	NA	NA	NA	NA	#N/A
603	LOC101908015	165.368	1502.68	-3.18378	NA	NA	NA	NA	NA	94	83.75	10.25	95.6604	-8.47347	NA	NA	NA	NA	NA	#N/A
604	LOC101908144	268.152	53.9374	2.31369	NA	NA	NA	NA	NA	NA	NA	NA	NA	NA	55.1319	71.8405	-16.7086	395.996	-9.18635	#N/A
605	LOC101908149	7.11072	17.1486	-1.27002	28.2082	53.0979	-24.8897	751.921	-14.5486	22.9171	59.1162	-36.1991	1381.53	-14.1441	54.2286	77.75	-23.5214	706.731	-12.1115	#N/A
606	LOC101908206	15.8544	224.806	-3.82573	85.1313	67.3212	17.8101	247.659	-11.5535	72.7893	27.9827	44.8066	1936.69	-18.6059	44.3914	32.9481	11.4433	84.2052	-10.2556	#N/A
607	LOC101908535	30.8816	11.2979	1.45069	NA	NA	NA	NA	NA	76.8125	55.5521	21.2604	414.949	-8.6396	23.1898	34.557	-11.3672	210.074	-6.44197	#N/A
608	LOC101910148	3.96432	8.26397	-1.05976	75.6867	61.0183	14.6684	148.692	-5.67777	NA	NA	NA	NA	NA	50	61.7667	-11.7667	220.051	-6.75198	#N/A
609	LOC104968422	713.036	202.715	1.81452	NA	NA	NA	NA	NA	14.5625	46.5833	-32.0208	1091.11	-11.0508	NA	NA	NA	NA	NA	#N/A
610	LOC104968753	4.46052	27.7812	-2.63883	NA	NA	NA	NA	NA	NA	NA	NA	NA	NA	18.5333	42.75	-24.2167	749.109	-15.9444	#N/A
611	LOC104968905	9.2162	216.794	-4.55601	54.9722	68.2625	-13.2903	269.028	-17.8678	NA	NA	NA	NA	NA	55.7582	76.5612	-20.803	587.931	-21.7309	#N/A
612	LOC104968939	22.5199	5.2761	2.09366	NA	NA	NA	NA	NA	7.375	36.9375	-29.5625	936.207	-10.5868	NA	NA	NA	NA	NA	#N/A
613	LOC104969002	123.051	41.2047	1.57838	19.7589	43.8026	-24.0437	708.002	-12.7621	NA	NA	NA	NA	NA	16	34.625	-18.625	472.288	-8.77501	#N/A
614	LOC104969038	2.34	8.26203	-1.81999	81.8259	63.5654	18.2604	250.916	-7.45843	NA	NA	NA	NA	NA	NA	NA	NA	NA	NA	#N/A
615	LOC104969225	5.63292	2.63317	1.09708	68.1923	55.5811	12.6112	103.615	-6.07033	NA	NA	NA	NA	NA	58.6979	29.3438	29.3542	694.021	-12.1859	#N/A
616	LOC104969238	1.76029	7.28787	-2.04969	NA	NA	NA	NA	NA	60.75	45.75	15	200.943	-6.41869	NA	NA	NA	NA	NA	#N/A
617	LOC104969334	112.281	27.6169	2.02349	60.4532	79.8035	-19.3503	482.526	-10.6879	18.625	68.3125	-49.6875	2569.16	-19.4115	NA	NA	NA	NA	NA	#N/A
618	LOC104969458	25.5178	11.7976	1.11302	NA	NA	NA	NA	NA	21.5	71.1417	-49.6417	2561.39	-18.9588	58.3805	80.128	-21.7475	615.944	-9.67501	#N/A
619	LOC104969531	22.3154	5.71865	1.96429	86.3856	68.2661	18.1195	248.168	-9.76198	NA	NA	NA	NA	NA	NA	NA	NA	NA	NA	#N/A
620	LOC104969545	32.4586	12.7701	1.34583	NA	NA	NA	NA	NA	2.1875	16.375	-14.1875	231.458	-6.02526	9.95	37.3806	-27.4306	930.607	-12.6196	#N/A
621	LOC104969596	42.3276	7.15153	2.56528	NA	NA	NA	NA	NA	3.3125	16.5	-13.1875	207.305	-7.9987	NA	NA	NA	NA	NA	#N/A
622	LOC104969640	2.88586	6.90742	-1.25915	NA	NA	NA	NA	NA	79.8639	63.3472	16.5167	243.47	-5.74335	NA	NA	NA	NA	NA	#N/A
623	LOC104970628	2.13505	14.603	-2.77392	65.9095	46.7219	19.1876	285.084	-9.30783	NA	NA	NA	NA	NA	NA	NA	NA	NA	NA	#N/A
624	LOC104970698	1.81979	7.30034	-2.00419	74.1671	54.1679	19.9991	309.365	-8.32788	NA	NA	NA	NA	NA	NA	NA	NA	NA	NA	#N/A
625	LOC104970784	53.2095	11.802	2.17265	NA	NA	NA	NA	NA	21.6667	62.875	-41.2083	1782.95	-15.2257	NA	NA	NA	NA	NA	#N/A
626	LOC104970904	1.36707	8.8978	-2.70237	82.6322	46.2681	36.3641	1152.72	-18.892	77.2098	28.5	48.7098	2287.26	-18.2827	88.8523	74.0321	14.8202	145.353	-7.52975	#N/A
627	LOC104970906	7.78535	2.23749	1.79888	NA	NA	NA	NA	NA	7.25	41.75	-34.5	1260.69	-11.9533	46.2266	57.8901	-11.6635	219.928	-6.96647	#N/A
628	LOC104970913	6.90791	18.5199	-1.42276	63.8257	44.725	19.1008	276.926	-7.38448	NA	NA	NA	NA	NA	NA	NA	NA	NA	NA	#N/A
629	LOC104970977	1.66715	33.4223	-4.32536	NA	NA	NA	NA	NA	63.5833	38.25	25.3333	611.868	-13.8649	70.697	31.3333	39.3636	1336.98	-20.8447	#N/A
630	LOC104971030	4.70501	10.229	-1.1204	NA	NA	NA	NA	NA	50.375	68.9375	-18.5625	381.797	-7.32814	NA	NA	NA	NA	NA	#N/A
631	LOC104971226	3.37841	7.4348	-1.13795	NA	NA	NA	NA	NA	69.4167	50.8583	18.5583	310.935	-6.028	NA	NA	NA	NA	NA	#N/A
632	LOC104971266	41.0427	10.4115	1.97895	NA	NA	NA	NA	NA	52.125	41.875	10.25	90.9555	-7.31167	NA	NA	NA	NA	NA	#N/A
633	LOC104971307	74.7051	23.625	1.66089	NA	NA	NA	NA	NA	94.0833	80.975	13.1083	151.023	-7.12175	87.4583	76.8958	10.5625	59.8515	-6.34919	#N/A
634	LOC104971364	114.992	25.3576	2.18103	72.7302	59.8348	12.8954	113.314	-8.27996	NA	NA	NA	NA	NA	NA	NA	NA	NA	NA	#N/A
635	LOC104971374	120.828	58.2949	1.05152	NA	NA	NA	NA	NA	80.1289	69.713	10.4159	90.9848	-5.60271	NA	NA	NA	NA	NA	#N/A
636	LOC104971503	60.1366	23.7083	1.34285	NA	NA	NA	NA	NA	42	74.1875	-32.1875	1100.5	-10.6847	NA	NA	NA	NA	NA	#N/A
637	LOC104971585	15.5041	4.54044	1.77174	NA	NA	NA	NA	NA	12.0139	45.1997	-33.1858	1169.13	-11.4268	5.6119	22.6264	-17.0145	405.802	-8.43661	#N/A
638	LOC104971707	34.8253	8.42765	2.04693	NA	NA	NA	NA	NA	NA	NA	NA	NA	NA	82.6273	55.1467	27.4806	602.18	-13.431	#N/A
639	LOC104971852	2.6291	9.65266	-1.87636	NA	NA	NA	NA	NA	NA	NA	NA	NA	NA	61.0848	48.6554	12.4294	91.1894	-5.70553	#N/A
640	LOC104972290	2.71654	8.13448	-1.58228	76.5767	54.2639	22.3128	394.266	-8.86293	44.4043	26.0561	18.3482	304.658	-6.33365	78.9146	63.7442	15.1704	149.246	-5.78847	#N/A
641	LOC104972351	194.397	48.0058	2.01772	NA	NA	NA	NA	NA	25.3884	51.0223	-25.6339	711.542	-9.31236	NA	NA	NA	NA	NA	#N/A
642	LOC104972363	157.354	16.179	3.28182	NA	NA	NA	NA	NA	83.0911	71.8169	11.2742	118.285	-11.3902	NA	NA	NA	NA	NA	#N/A
643	LOC104973054	16.957	40.089	-1.24132	82.9365	68.2157	14.7208	150.334	-5.80555	NA	NA	NA	NA	NA	NA	NA	NA	NA	NA	#N/A
644	LOC104973100	25.2714	8.01077	1.65749	NA	NA	NA	NA	NA	87.4322	75.4425	11.9897	125.068	-6.90714	NA	NA	NA	NA	NA	#N/A
645	LOC104973153	9.57843	36.4018	-1.92615	81.3729	68.1731	13.1998	117.464	-6.14643	75.1639	37.9688	37.1951	1316.67	-12.102	79.3798	63.3022	16.0776	173.189	-6.38588	#N/A
646	LOC104973262	1.39322	12.4531	-3.16002	75.0945	57.4446	17.6498	238.327	-9.67324	70.9626	47.3607	23.6019	522.06	-10.0399	NA	NA	NA	NA	NA	#N/A
647	LOC104973427	4.76452	44.555	-3.22518	NA	NA	NA	NA	NA	82.6924	60.7764	21.916	448.929	-9.87668	88.2722	65.5528	22.7194	396.828	-10.5105	#N/A
648	LOC104973485	3.70615	7.81531	-1.07638	NA	NA	NA	NA	NA	48.6339	67.1517	-18.5178	379.969	-7.25423	NA	NA	NA	NA	NA	#N/A
649	LOC104973517	54.2916	127.986	-1.23718	86.7995	70.8248	15.9747	182.524	-6.17042	77.7779	46.6616	31.1162	911.019	-9.42301	NA	NA	NA	NA	NA	#N/A
650	LOC104973526	75.732	19.9959	1.9212	NA	NA	NA	NA	NA	27.744	46.381	-18.6369	388.035	-7.54826	NA	NA	NA	NA	NA	#N/A
651	LOC104973586	2.91821	7.55607	-1.37255	NA	NA	NA	NA	NA	31.1136	49.0238	-17.9102	357.317	-7.54913	65.3125	84.9167	-19.6042	514.229	-10.3098	#N/A
652	LOC104973739	7.67284	16.5571	-1.10962	NA	NA	NA	NA	NA	60.7773	41.7529	19.0244	327.51	-6.10351	35.6188	17.2301	18.3887	236.55	-6.16247	#N/A
653	LOC104973799	17.1146	7.39218	1.21115	NA	NA	NA	NA	NA	60.1042	27.0938	33.0104	1029.53	-12.3201	75.25	43.875	31.375	804.758	-13.5554	#N/A
654	LOC104973826	437.621	171.155	1.35438	82.063	71.45	10.613	67.9409	-5.93702	14.5	56.6875	-42.1875	1863.34	-14.9919	76.1448	63.8192	12.3256	88.4778	-6.15372	#N/A
655	LOC104973848	34.6538	13.2442	1.38765	NA	NA	NA	NA	NA	80.4333	60.6458	19.7875	357.098	-8.10373	77.7659	57.1562	20.6097	311.069	-8.7122	#N/A
656	LOC104973986	21.5202	7.33277	1.55326	76.3999	64.8764	11.5235	84.1654	-6.51708	4.76923	17.2772	-12.508	184.085	-6.05202	50.9694	68.25	-17.2806	415.757	-8.26721	#N/A
657	LOC104974028	9.89683	27.177	-1.45735	NA	NA	NA	NA	NA	51.3448	34.3291	17.0157	259.733	-5.98656	NA	NA	NA	NA	NA	#N/A
658	LOC104974070	13.6259	4.05999	1.7468	52.8578	67.4421	-14.5842	295.755	-8.22719	NA	NA	NA	NA	NA	NA	NA	NA	NA	NA	#N/A
659	LOC104974280	2.32332	5.98446	-1.36503	NA	NA	NA	NA	NA	54.4515	31.3046	23.1469	494.062	-7.15998	NA	NA	NA	NA	NA	#N/A
660	LOC104974328	16.4006	3.60481	2.18576	51.51	34.6879	16.8221	210.328	-9.75112	NA	NA	NA	NA	NA	NA	NA	NA	NA	NA	#N/A
661	LOC104974370	213.783	100.572	1.08792	NA	NA	NA	NA	NA	26.1085	39.8214	-13.7129	216.61	-5.7	NA	NA	NA	NA	NA	#N/A
662	LOC104974401	77.7651	27.4416	1.50276	NA	NA	NA	NA	NA	NA	NA	NA	NA	NA	23	45.25	-22.25	642.238	-10.174	#N/A
663	LOC104974459	29.3874	14.2287	1.0464	88.1552	65.6132	22.542	402.767	-10.067	NA	NA	NA	NA	NA	NA	NA	NA	NA	NA	#N/A
664	LOC104974508	8.88833	3.60694	1.30114	65.2472	80.7573	-15.5101	326.774	-8.09759	13.4167	45.9375	-32.5208	1122.58	-10.7817	NA	NA	NA	NA	NA	#N/A
665	LOC104974542	57.1816	126.878	-1.14982	76.0335	59.5418	16.4917	196.531	-6.27969	NA	NA	NA	NA	NA	NA	NA	NA	NA	NA	#N/A
666	LOC104974562	47.0433	22.4507	1.06723	83.4037	61.1902	22.2135	389.765	-9.92743	NA	NA	NA	NA	NA	78.8781	60.1205	18.7575	248.533	-7.47164	#N/A
667	LOC104974701	10.0801	3.81328	1.40241	32.3158	46.381	-14.0652	277.094	-7.62499	NA	NA	NA	NA	NA	NA	NA	NA	NA	NA	#N/A
668	LOC104974955	9.18643	2.30566	1.99432	47.7852	29.4303	18.355	255.702	-9.94099	NA	NA	NA	NA	NA	NA	NA	NA	NA	NA	#N/A
669	LOC104975274	2.54672	23.177	-3.18598	NA	NA	NA	NA	NA	NA	NA	NA	NA	NA	70.5208	32.5833	37.9375	1227.17	-17.1411	#N/A
670	LOC104975324	60.5651	8.66994	2.80439	NA	NA	NA	NA	NA	53.4132	81.8452	-28.432	872.181	-11.5516	91.5	79.25	12.25	93.5207	-9.6364	#N/A
671	LOC104975377	14.7972	6.37785	1.21419	84.7482	73.6259	11.1223	76.0549	-5.84252	NA	NA	NA	NA	NA	71	41.5	29.5	702.022	-12.4991	#N/A
672	LOC104975561	62.6518	30.8358	1.02275	35.5708	52.0121	-16.4414	360.47	-8.28902	11.4559	41.9314	-30.4755	989.109	-9.89395	28.0599	61.8274	-33.7675	1356.07	-16.3878	#N/A
673	LOC104975626	2.42416	15.9598	-2.71889	NA	NA	NA	NA	NA	48.7575	32.4163	16.3412	243.416	-7.82872	NA	NA	NA	NA	NA	#N/A
674	LOC104975682	11.7809	196.455	-4.05968	86.5927	66.1644	20.4283	336.414	-13.1166	79.8271	57.5411	22.286	470.413	-12.3969	83.5999	67.012	16.5879	198.924	-11.5923	#N/A
675	LOC104975788	28.7821	133.219	-2.21056	71.519	55.9668	15.5523	174.39	-7.1533	NA	NA	NA	NA	NA	47.0742	17.0923	29.9818	730.197	-11.3786	#N/A
676	LOC104975830	10.4433	146.013	-3.80544	70.5206	35.245	35.2756	1087.05	-20.3322	73.625	33.5	40.125	1547.84	-16.5929	NA	NA	NA	NA	NA	#N/A
677	LOC104975911	486.436	140.59	1.79076	83.0696	57.4228	25.6467	539.137	-13.4039	NA	NA	NA	NA	NA	61.625	28.8333	32.7917	888.954	-15.8085	#N/A
678	LOC104975913	2.22819	17.4716	-2.97107	87.3956	64.0028	23.3928	444.12	-11.395	81.6401	37.651	43.989	1860.09	-16.3891	90.983	77.5449	13.4381	116.147	-7.95781	#N/A
679	LOC104975979	9.89989	23.6153	-1.25424	74.8645	44.6007	30.2638	771.576	-13.1528	NA	NA	NA	NA	NA	NA	NA	NA	NA	NA	#N/A
680	LOC104976076	2730.5	441.303	2.62932	73.201	58.7534	14.4476	150.258	-10.0328	NA	NA	NA	NA	NA	NA	NA	NA	NA	NA	#N/A
681	LOC104976281	26594	4241.05	2.64861	NA	NA	NA	NA	NA	85.0266	65.1136	19.913	367.3	-11.4156	71.9527	39.4583	32.4943	875.4	-18.294	#N/A
682	LOC104976804	31983.6	9082.82	1.81612	88.1262	65.0733	23.053	425.933	-11.9099	NA	NA	NA	NA	NA	53.9464	24.1177	29.8287	721.52	-14.0985	#N/A
683	LOC104976976	2.93817	8.37043	-1.51039	37.8274	21.4419	16.3855	194.425	-6.51505	NA	NA	NA	NA	NA	NA	NA	NA	NA	NA	#N/A
684	LOC107131218	3.2106	9.86514	-1.6195	81.221	50	31.221	826.568	-13.9693	94.3802	83.8	10.5802	94.8548	-5.36556	NA	NA	NA	NA	NA	#N/A
685	LOC107131224	149.734	68.1828	1.13493	NA	NA	NA	NA	NA	7.5	23.825	-16.325	300.167	-6.17067	10.8	39.9208	-29.1208	1035.89	-13.4776	#N/A
686	LOC107131259	10.3516	54.1486	-2.38707	73.822	37.9312	35.8908	1119.39	-18.0904	NA	NA	NA	NA	NA	NA	NA	NA	NA	NA	#N/A
687	LOC107131296	6.87806	53.244	-2.95254	NA	NA	NA	NA	NA	76.2917	56.0833	20.2083	378.646	-8.9186	NA	NA	NA	NA	NA	#N/A
688	LOC107131323	4004.63	839.127	2.25471	79.1183	61.2381	17.8803	242.066	-10.3928	NA	NA	NA	NA	NA	81.0985	70.5326	10.5659	62.396	-7.68493	#N/A
689	LOC107131534	8.75217	42.3898	-2.276	NA	NA	NA	NA	NA	79.0823	58.4529	20.6294	391.699	-7.66264	NA	NA	NA	NA	NA	#N/A
690	LOC107131549	7.83582	28.6402	-1.86989	NA	NA	NA	NA	NA	62.5938	41.375	21.2188	413.676	-7.20236	69.5181	49.8023	19.7158	281.102	-7.17863	#N/A
691	LOC107131571	2.34748	25.9117	-3.46442	79.1704	56.5983	22.5721	413.542	-12.2019	74.3333	41.0625	33.2708	1055.46	-13.2966	87.5061	76.4366	11.0695	75.5299	-9.08645	#N/A
692	LOC107131579	111.724	34.1696	1.70915	88.916	77.7197	11.1963	78.929	-6.72745	NA	NA	NA	NA	NA	NA	NA	NA	NA	NA	#N/A
693	LOC107131590	232.93	37.657	2.62891	NA	NA	NA	NA	NA	NA	NA	NA	NA	NA	83.125	48.6667	34.4583	994.849	-19.5304	#N/A
694	LOC107131639	1.81829	8.23647	-2.17944	75.8083	56.4258	19.3825	288.855	-8.3355	17.6349	53.3542	-35.7192	1348.98	-16.1417	NA	NA	NA	NA	NA	#N/A
695	LOC107131652	17.3009	45.0502	-1.38068	NA	NA	NA	NA	NA	61.8781	45.9392	15.9389	226.103	-5.74781	69.5461	54.9468	14.5994	135.178	-5.48352	#N/A
696	LOC107131715	17.8306	40.2234	-1.17368	85.972	69.7359	16.2361	189.497	-6.21177	NA	NA	NA	NA	NA	NA	NA	NA	NA	NA	#N/A
697	LOC107131716	29.0172	8.5762	1.7585	NA	NA	NA	NA	NA	NA	NA	NA	NA	NA	88.8332	73.1435	15.6897	163.651	-7.81529	#N/A
698	LOC107131831	1	6.95194	-2.79742	84.8622	71.7731	13.0892	118.966	-7.6982	68.5467	20.7143	47.8324	2204.72	-17.966	32.6806	18.5593	14.1213	129.87	-7.63677	#N/A
699	LOC107131857	1	7.51561	-2.90989	84.2182	65.5438	18.6744	268.96	-9.41952	28.994	18.8911	10.1029	91.359	-7.74325	NA	NA	NA	NA	NA	#N/A
700	LOC107131941	996.139	175.098	2.50818	67.3614	38.1573	29.2041	719.71	-17.8739	86.8688	66.2344	20.6344	394.411	-11.1896	70.3975	57.5867	12.8108	102.508	-8.89982	#N/A
701	LOC107131942	1652.73	365.958	2.1751	75.0558	63.9436	11.1122	79.422	-7.73075	NA	NA	NA	NA	NA	NA	NA	NA	NA	NA	#N/A
702	LOC107132077	22.4699	4.61708	2.28294	28.5111	57.5006	-28.9895	998.036	-16.9329	NA	NA	NA	NA	NA	NA	NA	NA	NA	NA	#N/A
703	LOC107132224	181.247	44.0584	2.04047	51.2308	72.6405	-21.4097	576.876	-11.7763	14.744	66.3298	-51.5857	2765.09	-20.5239	10.8333	58.7583	-47.925	2602.09	-28.1303	#N/A
704	LOC107132226	21.6876	5.06769	2.09747	NA	NA	NA	NA	NA	11.2625	32.3393	-21.0768	490.342	-8.32827	NA	NA	NA	NA	NA	#N/A
705	LOC107132328	36.6896	4.77852	2.94074	NA	NA	NA	NA	NA	75.8	43.225	32.575	1009.49	-17.2626	NA	NA	NA	NA	NA	#N/A
706	LOC107132340	513.786	142.648	1.84871	NA	NA	NA	NA	NA	12.2846	37.6156	-25.331	694.824	-8.99054	NA	NA	NA	NA	NA	#N/A
707	LOC107132360	93.9292	26.0535	1.8501	NA	NA	NA	NA	NA	64.327	50.8158	13.5112	161.699	-7.61368	50.7206	34.1109	16.6096	188.128	-8.3046	#N/A
708	LOC107132422	2.82635	9.60811	-1.76531	NA	NA	NA	NA	NA	90.3964	75.1107	15.2857	208.05	-6.05892	90.875	79.875	11	66.014	-5.37885	#N/A
709	LOC107132456	325.341	101.48	1.68076	NA	NA	NA	NA	NA	13.9903	29.3366	-15.3462	269	-6.62332	NA	NA	NA	NA	NA	#N/A
710	LOC107132462	12.0379	4.49807	1.4202	92.3826	76.206	16.1766	189.277	-7.79729	60.3839	82.1297	-21.7457	517.682	-7.57168	NA	NA	NA	NA	NA	#N/A
711	LOC107132508	250.873	86.913	1.52932	NA	NA	NA	NA	NA	NA	NA	NA	NA	NA	91.6875	73.7982	17.8893	223.322	-8.02353	#N/A
712	LOC107132530	23.182	10.0417	1.20701	NA	NA	NA	NA	NA	67.6188	57.4694	10.1493	86.4073	-5.79536	NA	NA	NA	NA	NA	#N/A
713	LOC107132550	19.6349	9.5527	1.03944	83.7735	64.7097	19.0638	275.488	-8.34956	NA	NA	NA	NA	NA	64.9375	50.8375	14.1	123.74	-6.06983	#N/A
714	LOC107132573	11.7791	5.54398	1.08723	NA	NA	NA	NA	NA	34.9375	46.9271	-11.9896	169.03	-5.46009	NA	NA	NA	NA	NA	#N/A
715	LOC107132618	1.59817	26.5945	-4.05664	89.9586	78.8125	11.1461	89.8798	-10.9749	76.5625	51.4375	25.125	599.58	-12.9073	NA	NA	NA	NA	NA	#N/A
716	LOC107132656	599.555	29.8498	4.3281	77.5532	66.8294	10.7238	87.5314	-15.0034	82.625	47.875	34.75	1162.27	-24.618	NA	NA	NA	NA	NA	#N/A
717	LOC107132707	10.5799	4.25561	1.31388	NA	NA	NA	NA	NA	56.5972	32.1938	24.4035	552.065	-9.31755	NA	NA	NA	NA	NA	#N/A
718	LOC107132718	55.2229	21.0737	1.38982	NA	NA	NA	NA	NA	9.875	40.5	-30.625	999.522	-10.1572	NA	NA	NA	NA	NA	#N/A
719	LOC107132783	123.093	43.8036	1.49063	54.3904	78.689	-24.2986	721.308	-12.844	NA	NA	NA	NA	NA	NA	NA	NA	NA	NA	#N/A
720	LOC107132832	2.29147	6.06117	-1.40332	NA	NA	NA	NA	NA	77.8333	56.25	21.5833	427.195	-6.8245	NA	NA	NA	NA	NA	#N/A
721	LOC107132901	90.8022	9.40992	3.27047	NA	NA	NA	NA	NA	9.31875	19.5179	-10.1991	136.044	-9.6789	NA	NA	NA	NA	NA	#N/A
722	LOC107132935	161.338	21.9772	2.876	NA	NA	NA	NA	NA	9.5	36.125	-26.625	769.675	-11.2152	NA	NA	NA	NA	NA	#N/A
723	LOC107132958	3.74506	8.02819	-1.10009	NA	NA	NA	NA	NA	NA	NA	NA	NA	NA	49.656	65.1607	-15.5047	344.789	-8.10869	#N/A
724	LOC107132971	19.3263	74.1285	-1.93946	18.1756	8.07465	10.101	60.8521	-5.60125	78.2951	36.2583	42.0368	1691.11	-14.1922	NA	NA	NA	NA	NA	#N/A
725	LOC107132980	6.84293	91.2108	-3.73652	84.8812	61.2956	23.5856	457.114	-13.3707	54.9743	26.072	28.9023	794.06	-12.7831	83.8381	66.4639	17.3741	218.42	-10.6685	#N/A
726	LOC107133025	1.6913	18.8197	-3.47604	NA	NA	NA	NA	NA	72.6458	42.6875	29.9583	852.402	-12.3513	78.9924	63.8401	15.1523	157.85	-9.53566	#N/A
727	LOC107133053	83.6226	10.0772	3.0528	50.4512	67.1338	-16.6826	378.55	-11.5549	NA	NA	NA	NA	NA	NA	NA	NA	NA	NA	#N/A
728	LOC107133088	372.831	121.824	1.61372	NA	NA	NA	NA	NA	5.46875	32.5313	-27.0625	787.96	-9.20489	8.49242	22.2366	-13.7442	284.758	-7.24074	#N/A
729	LOC107133108	139.007	21.0412	2.72387	67.3214	83.4224	-16.101	354.565	-10.5476	NA	NA	NA	NA	NA	NA	NA	NA	NA	NA	#N/A
730	LOC107133109	47.9653	11.3853	2.07482	NA	NA	NA	NA	NA	74.375	21.5	52.875	2700.84	-25.7878	92.3125	59.5208	32.7917	890.133	-16.6163	#N/A
731	LOC107133110	103.613	35.7372	1.5357	NA	NA	NA	NA	NA	53.298	73.7439	-20.4459	460.737	-7.39623	NA	NA	NA	NA	NA	#N/A
732	LOC107133160	6.31274	14.3501	-1.18473	NA	NA	NA	NA	NA	86.8125	70.1667	16.6458	247.347	-5.71376	NA	NA	NA	NA	NA	#N/A
733	LOC107133260	3.51966	34.9599	-3.31219	86.2308	61.3007	24.93	512.732	-12.8765	88.125	54.375	33.75	1085.67	-13.0821	NA	NA	NA	NA	NA	#N/A
734	LOC107133343	6.94896	15.6834	-1.17437	NA	NA	NA	NA	NA	74.739	35.2079	39.5311	1489.33	-12.7298	NA	NA	NA	NA	NA	#N/A
735	LOC112441472	4.10315	15.0669	-1.87657	NA	NA	NA	NA	NA	77.0875	37.7083	39.3792	1479.57	-12.9649	79.625	39.875	39.75	1350.71	-16.5423	#N/A
736	LOC112441493	54.6834	154.086	-1.49456	NA	NA	NA	NA	NA	25.1402	9.22159	15.9186	225.79	-5.8487	41.625	25.75	15.875	166.593	-5.84241	#N/A
737	LOC112441494	820.514	381.225	1.10588	NA	NA	NA	NA	NA	29.6917	43.0417	-13.35	206.141	-5.66244	69.1583	81.4111	-12.2528	235.395	-6.32822	#N/A
738	LOC112441502	554.058	142.108	1.96305	NA	NA	NA	NA	NA	NA	NA	NA	NA	NA	66.8583	43.0833	23.775	434.41	-11.3654	#N/A
739	LOC112441535	114.579	50.9167	1.17013	80.1939	51.6698	28.5241	678.55	-13.9441	NA	NA	NA	NA	NA	NA	NA	NA	NA	NA	#N/A
740	LOC112441555	2.09222	6.18662	-1.56412	NA	NA	NA	NA	NA	71.475	34.225	37.25	1319.49	-11.8705	NA	NA	NA	NA	NA	#N/A
741	LOC112441603	91.2019	20.0504	2.18543	NA	NA	NA	NA	NA	16.125	72.1667	-56.0417	3253.81	-23.3949	NA	NA	NA	NA	NA	#N/A
742	LOC112441604	137.722	19.8971	2.79113	NA	NA	NA	NA	NA	7.25	26.125	-18.875	401.775	-9.32794	NA	NA	NA	NA	NA	#N/A
743	LOC112441605	2238.52	340.334	2.71752	84.5314	72.5731	11.9583	97.5129	-9.43878	NA	NA	NA	NA	NA	59.9375	43.0625	16.875	199.609	-10.767	#N/A
744	LOC112441613	24.0259	10.3477	1.21528	NA	NA	NA	NA	NA	82.7857	38.1056	44.6801	1913.92	-18.1207	73.6577	60.6324	13.0253	101.566	-6.08169	#N/A
745	LOC112441619	1.90395	6.51194	-1.77409	NA	NA	NA	NA	NA	NA	NA	NA	NA	NA	68.4649	53.2743	15.1906	150.326	-6.01359	#N/A
746	LOC112441628	8.10374	19.9259	-1.29798	67.1775	53.438	13.7395	127.456	-5.58846	NA	NA	NA	NA	NA	NA	NA	NA	NA	NA	#N/A
747	LOC112441652	4.04556	16.9189	-2.06422	76.3595	52.6373	23.7222	453.689	-10.0258	71.1183	33.7537	37.3646	1329.49	-12.3004	78.125	34.8125	43.3125	1625.65	-19.1398	#N/A
748	LOC112441819	5.33904	32.9398	-2.62518	73.7731	44.2873	29.4857	733.902	-13.9799	81.8114	46.4924	35.319	1187.17	-12.2618	79.9605	46.8748	33.0857	908.974	-13.4761	#N/A
749	LOC112441821	4.19451	10.9073	-1.37872	87.1523	69.0222	18.1301	245.548	-6.99115	NA	NA	NA	NA	NA	NA	NA	NA	NA	NA	#N/A
750	LOC112441824	2.09222	7.60491	-1.86189	91.1427	72.6834	18.4593	257.363	-7.57796	34.7928	18.1508	16.642	249.092	-6.37703	NA	NA	NA	NA	NA	#N/A
751	LOC112441835	207.652	42.5547	2.28678	NA	NA	NA	NA	NA	59.3825	88.9724	-29.5898	938.777	-10.8986	NA	NA	NA	NA	NA	#N/A
752	LOC112441841	2.32332	9.87818	-2.08806	NA	NA	NA	NA	NA	81.0326	68.6742	12.3584	133.855	-6.19183	NA	NA	NA	NA	NA	#N/A
753	LOC112441869	93.7774	28.8321	1.70156	NA	NA	NA	NA	NA	26.8889	60.6095	-33.7206	1205.66	-11.5552	NA	NA	NA	NA	NA	#N/A
754	LOC112441876	9.86198	3.88145	1.34528	70.3385	46.9035	23.435	440.147	-11.099	79.125	23.375	55.75	3004.95	-25.51	74.2111	28.6306	45.5806	1811.99	-24.1547	#N/A
755	LOC112442079	35.4377	14.7476	1.26481	NA	NA	NA	NA	NA	50.7033	78.2173	-27.5141	812.358	-9.03531	NA	NA	NA	NA	NA	#N/A
756	LOC112442080	25.8221	8.26596	1.64335	59.3061	42.7492	16.5569	200.568	-8.38228	NA	NA	NA	NA	NA	51.69	23.9837	27.7062	611.657	-12.4956	#N/A
757	LOC112442215	215.853	32.3709	2.73728	NA	NA	NA	NA	NA	7.02381	28.625	-21.6012	517.003	-9.71459	22.25	57.8833	-35.6333	1503.84	-19.2031	#N/A
758	LOC112442224	14.3057	4.34907	1.71781	50.728	71.1708	-20.4428	530.247	-10.8424	64.7722	81.2	-16.4278	305.563	-6.8501	NA	NA	NA	NA	NA	#N/A
759	LOC112442254	163.494	65.0363	1.32992	NA	NA	NA	NA	NA	NA	NA	NA	NA	NA	84.9627	71.7709	13.1918	105.245	-6.31024	#N/A
760	LOC112442262	44.8689	19.8173	1.17895	NA	NA	NA	NA	NA	67.0161	53.409	13.6072	161.889	-6.32501	81.4051	65.3426	16.0625	171.355	-6.81083	#N/A
761	LOC112442264	4.38698	13.9505	-1.66902	13.3369	26.8118	-13.4749	257.783	-8.66386	NA	NA	NA	NA	NA	61.017	46.0425	14.9745	144.789	-5.84696	#N/A
762	LOC112442325	13.6535	6.64145	1.0397	NA	NA	NA	NA	NA	44.682	65.0361	-20.3541	455.395	-6.92889	NA	NA	NA	NA	NA	#N/A
763	LOC112442349	76.2105	14.5878	2.38523	16.7727	33.6474	-16.8747	382.129	-10.1672	11.4583	28	-16.5417	312.469	-8.03651	NA	NA	NA	NA	NA	#N/A
764	LOC112442382	6.72848	14.7585	-1.1332	NA	NA	NA	NA	NA	84.125	61.625	22.5	465.252	-6.87457	71.2214	30.625	40.5964	1411.54	-16.9026	#N/A
765	LOC112442414	1077.35	327.599	1.71749	NA	NA	NA	NA	NA	23.9063	37.0541	-13.1478	202.305	-6.36663	NA	NA	NA	NA	NA	#N/A
766	LOC112442544	1.48635	6.61394	-2.15373	89.7494	75.3586	14.3907	145.207	-6.76232	NA	NA	NA	NA	NA	NA	NA	NA	NA	NA	#N/A
767	LOC112442568	7.51948	3.31783	1.18039	87.5736	76.6155	10.9581	73.162	-5.75095	NA	NA	NA	NA	NA	28.575	43.1667	-14.5917	312.588	-7.04648	#N/A
768	LOC112442599	1.4099	15.6746	-3.47477	74.0464	46.8604	27.186	620.041	-14.4121	72.4554	51.8839	20.5714	395.964	-10.3151	NA	NA	NA	NA	NA	#N/A
769	LOC112442606	1.16212	8.49165	-2.86929	85.5549	61.7281	23.8268	461.869	-11.3835	39.8333	20.5625	19.2708	342.96	-8.5765	75.4065	46.6136	28.7929	670.702	-11.9034	#N/A
770	LOC112442613	66.4473	25.4278	1.3858	83.4335	67.7043	15.7292	177.141	-7.56537	83.8972	55.198	28.6993	772.212	-10.969	NA	NA	NA	NA	NA	#N/A
771	LOC112442623	31.0515	14.4008	1.10852	NA	NA	NA	NA	NA	NA	NA	NA	NA	NA	5.7754	29.6678	-23.8924	726.866	-10.6687	#N/A
772	LOC112442632	54.1561	15.7463	1.78211	14.8909	50.954	-36.063	1491.49	-22.1756	NA	NA	NA	NA	NA	NA	NA	NA	NA	NA	#N/A
773	LOC112442638	3.19342	10.55	-1.72407	NA	NA	NA	NA	NA	64.5193	33.2973	31.222	918.707	-9.74397	68.0323	47.2835	20.7488	316.143	-7.30938	#N/A
774	LOC112442663	6.44593	16.4257	-1.34949	30.9892	15.3737	15.6154	173.233	-6.14338	NA	NA	NA	NA	NA	NA	NA	NA	NA	NA	#N/A
775	LOC112442666	23.4803	8.96788	1.38861	NA	NA	NA	NA	NA	70.0625	85.375	-15.3125	266.919	-6.2477	NA	NA	NA	NA	NA	#N/A
776	LOC112442668	21.7124	4.39169	2.30567	NA	NA	NA	NA	NA	40.6607	60.4661	-19.8054	436.918	-8.44343	89.8342	68.6734	21.1608	334.387	-11.1617	#N/A
777	LOC112442677	287.913	121.242	1.24775	59.7279	73.3553	-13.6275	262.321	-7.31431	10.0417	22.4417	-12.4	180.243	-5.67037	NA	NA	NA	NA	NA	#N/A
778	LOC112442683	1.62432	15.4962	-3.25401	78.8517	37.8258	41.0259	1493.23	-23.7201	69.4659	31.3409	38.125	1391.42	-14.4898	72.25	32	40.25	1394.35	-18.6872	#N/A
779	LOC112442688	4.61808	16.5511	-1.84156	NA	NA	NA	NA	NA	82.7523	63.0999	19.6524	352.544	-6.85966	66.4806	38	28.4806	650.162	-10.2927	#N/A
780	LOC112442694	3.2106	9.85273	-1.61768	NA	NA	NA	NA	NA	NA	NA	NA	NA	NA	79.3281	56.2971	23.0311	401.861	-7.94058	#N/A
781	LOC112442700	12.4424	42.8518	-1.78409	NA	NA	NA	NA	NA	NA	NA	NA	NA	NA	93.6563	81.5313	12.125	85.2532	-5.53805	#N/A
782	LOC112442701	137.149	35.6832	1.94243	NA	NA	NA	NA	NA	11.522	36.3384	-24.8165	668.422	-8.98235	50.269	61.4854	-11.2164	207.56	-7.08908	#N/A
783	LOC112442703	258.766	76.2269	1.76328	NA	NA	NA	NA	NA	NA	NA	NA	NA	NA	78.2349	52.7989	25.436	505.254	-11.6409	#N/A
784	LOC112442705	42.4893	18.0427	1.23569	NA	NA	NA	NA	NA	16.6979	57.2	-40.5021	1720.42	-14.1317	12.6341	55.7113	-43.0772	2128.6	-23.5266	#N/A
785	LOC112442733	14.7825	31.6324	-1.09751	69.9263	44.9737	24.9525	504.634	-9.90471	73.9518	34.6586	39.2932	1470.89	-12.6202	76.2186	57.6401	18.5785	242.39	-6.20789	#N/A
786	LOC112442735	31.0369	11.3959	1.44547	89.2862	79.0646	10.2215	62.0309	-5.9955	50.8307	67.5339	-16.7031	314.27	-6.54787	NA	NA	NA	NA	NA	#N/A
787	LOC112442738	3.47683	12.1492	-1.80502	87.1868	66.7982	20.3886	322.44	-8.2457	60.0225	45.7365	14.286	180.522	-5.98054	86.0585	58.8609	27.1975	586.401	-9.70414	#N/A
788	LOC112442742	2.17018	25.6776	-3.56462	84.3601	64.9574	19.4027	297.083	-11.2843	77.913	42.6826	35.2304	1186.63	-14.1871	85.6156	63.0907	22.5249	391.419	-11.3415	#N/A
789	LOC112442757	133.623	34.4124	1.95717	NA	NA	NA	NA	NA	62.5219	46.7442	15.7777	224.203	-8.35834	NA	NA	NA	NA	NA	#N/A
790	LOC112442805	13.1352	4.86823	1.43197	86.1006	72.3558	13.7448	128.752	-6.95752	92.25	81	11.25	108.524	-6.3449	NA	NA	NA	NA	NA	#N/A
791	LOC112442823	34.3964	105.816	-1.62122	NA	NA	NA	NA	NA	62.1875	29.4375	32.75	1013.23	-10.1895	NA	NA	NA	NA	NA	#N/A
792	LOC112442847	7815.72	2444.8	1.67666	NA	NA	NA	NA	NA	21.301	10.3757	10.9253	102.774	-6.76287	NA	NA	NA	NA	NA	#N/A
793	LOC112442851	4507.47	1181.04	1.93226	70.9137	47.733	23.1808	431.672	-12.2679	NA	NA	NA	NA	NA	NA	NA	NA	NA	NA	#N/A
794	LOC112442858	3.44867	7.18809	-1.05957	73.078	49.1725	23.9054	458.657	-9.34332	49.0928	23.1458	25.947	625.539	-7.74837	NA	NA	NA	NA	NA	#N/A
795	LOC112442949	240.114	103.995	1.2072	NA	NA	NA	NA	NA	61.1186	73.6879	-12.5693	184.682	-5.65067	NA	NA	NA	NA	NA	#N/A
796	LOC112442975	19.1659	9.01028	1.0889	22.5334	49.7986	-27.2652	888.005	-14.5922	10.1125	46.3129	-36.2004	1381.89	-12.1509	NA	NA	NA	NA	NA	#N/A
797	LOC112443001	32.9856	116.619	-1.82189	48.6445	25.213	23.4314	440.568	-9.6106	NA	NA	NA	NA	NA	NA	NA	NA	NA	NA	#N/A
798	LOC112443018	6.47978	30.4877	-2.23421	NA	NA	NA	NA	NA	60.9091	23.1231	37.7861	1361.04	-12.6542	72.4345	29.1369	43.2976	1625.13	-19.2696	#N/A
799	LOC112443124	3.32241	19.7744	-2.57333	NA	NA	NA	NA	NA	79.928	66.5347	13.3933	160.653	-7.1953	NA	NA	NA	NA	NA	#N/A
800	LOC112443130	152.71	65.2206	1.2274	NA	NA	NA	NA	NA	NA	NA	NA	NA	NA	37.7977	24.9167	12.881	98.7393	-6.06799	#N/A
801	LOC112443144	8.56581	4.23657	1.01569	NA	NA	NA	NA	NA	23.2708	39.7292	-16.4583	304.501	-6.10109	NA	NA	NA	NA	NA	#N/A
802	LOC112443148	36.0231	6.85189	2.39435	88.1077	74.4073	13.7004	131.725	-9.10131	NA	NA	NA	NA	NA	NA	NA	NA	NA	NA	#N/A
803	LOC112443180	12.8213	44.5996	-1.79848	84.7158	67.8912	16.8246	207.671	-6.95482	NA	NA	NA	NA	NA	NA	NA	NA	NA	NA	#N/A
804	LOC112443195	19.2054	6.80714	1.49639	NA	NA	NA	NA	NA	NA	NA	NA	NA	NA	58.3333	79.5	-21.1667	588.598	-9.70021	#N/A
805	LOC112443201	2.31762	9.15448	-1.98183	73.1937	57.9224	15.2713	166.249	-6.73448	54.1667	14.1667	40	1528.05	-13.3188	NA	NA	NA	NA	NA	#N/A
806	LOC112443202	2.41846	7.91332	-1.71019	76.4082	61.7056	14.7026	151.134	-6.23651	NA	NA	NA	NA	NA	NA	NA	NA	NA	NA	#N/A
807	LOC112443203	1.62432	6.66687	-2.03717	76.3806	64.8486	11.532	84.9898	-5.97802	NA	NA	NA	NA	NA	76.375	47.25	29.125	684.072	-10.7818	#N/A
808	LOC112443224	29.5493	8.04901	1.87624	NA	NA	NA	NA	NA	69.9015	83.9604	-14.0589	229.447	-6.73485	NA	NA	NA	NA	NA	#N/A
809	LOC112443228	12.8052	4.65948	1.45849	NA	NA	NA	NA	NA	36.3125	67.256	-30.9435	1019.95	-10.3225	NA	NA	NA	NA	NA	#N/A
810	LOC112443413	107.883	24.8118	2.12036	83.6384	58.3843	25.2541	522.51	-14.0109	NA	NA	NA	NA	NA	NA	NA	NA	NA	NA	#N/A
811	LOC112443426	4.78675	56.9067	-3.57148	67.7251	38.7027	29.0224	714.703	-15.6699	86.9286	59.3391	27.5895	721.239	-11.9937	NA	NA	NA	NA	NA	#N/A
812	LOC112443431	40.769	9.13994	2.15722	NA	NA	NA	NA	NA	86.1234	73.1244	12.9989	150.416	-8.2544	89.7034	72.7198	16.9836	199.734	-9.18382	#N/A
813	LOC112443471	10.3498	37.6075	-1.86141	NA	NA	NA	NA	NA	63.879	48.5995	15.2796	208.194	-6.18303	76.3511	59.326	17.0251	198.568	-6.501	#N/A
814	LOC112443491	140.415	37.5752	1.90184	60.2482	70.5862	-10.338	169.239	-7.08149	NA	NA	NA	NA	NA	NA	NA	NA	NA	NA	#N/A
815	LOC112443502	4428	2074.38	1.09398	NA	NA	NA	NA	NA	NA	NA	NA	NA	NA	34.9167	9.78125	25.1354	489.778	-10.063	#N/A
816	LOC112443735	74.7965	18.0261	2.05289	69.6483	54.6901	14.9582	159.842	-8.68189	30.4298	49.6664	-19.2366	412.453	-7.87735	NA	NA	NA	NA	NA	#N/A
817	LOC112443745	9.69672	38.83	-2.0016	NA	NA	NA	NA	NA	71.3986	37.2452	34.1534	1105.71	-11.0167	53.4326	41.3888	12.0438	84.5465	-5.84285	#N/A
818	LOC112444147	17.8153	92.2442	-2.37235	NA	NA	NA	NA	NA	NA	NA	NA	NA	NA	77.5576	48.5294	29.0283	680.417	-11.1669	#N/A
819	LOC112444184	88.5137	30.7245	1.52651	NA	NA	NA	NA	NA	73.8782	91.3805	-17.5023	343.394	-6.788	NA	NA	NA	NA	NA	#N/A
820	LOC112444301	3.77121	13.9866	-1.89095	73.2727	34.0055	39.2672	1354.23	-20.4119	74.5875	35.5025	39.085	1457.1	-12.851	76.2165	51.5045	24.7119	472.776	-8.81021	#N/A
821	LOC112444310	463.573	131.492	1.81782	48.7167	60.2553	-11.5387	201.19	-7.29333	NA	NA	NA	NA	NA	NA	NA	NA	NA	NA	#N/A
822	LOC112444316	18.083	5.65902	1.67601	79.2994	90.7395	-11.4401	197.895	-7.0625	11.8348	47.4023	-35.5674	1337.05	-12.2525	13.8958	63.25	-49.3542	2748.35	-29.2941	#N/A
823	LOC112444326	161.367	34.4974	2.22578	NA	NA	NA	NA	NA	NA	NA	NA	NA	NA	38.4641	53.7431	-15.279	341.154	-8.59801	#N/A
824	LOC112444340	3.36852	15.1942	-2.17333	73.4134	40.7755	32.6379	911.881	-15.4319	74.3847	57.5786	16.8061	255.431	-6.85813	88.9238	70.8	18.1238	231.679	-7.19356	#N/A
825	LOC112444342	3.27338	9.23602	-1.49649	NA	NA	NA	NA	NA	87.2462	70.0444	17.2018	265.851	-6.05346	75.1817	58.1527	17.0291	197.558	-6.0995	#N/A
826	LOC112444357	11.1644	1.74642	2.67644	NA	NA	NA	NA	NA	NA	NA	NA	NA	NA	81.0985	66.0039	15.0946	153.279	-10.053	#N/A
827	LOC112444470	35.0201	13.8649	1.33675	NA	NA	NA	NA	NA	NA	NA	NA	NA	NA	50.8648	37.4903	13.3745	109.007	-6.36561	#N/A
828	LOC112444485	40.8467	15.6062	1.3881	NA	NA	NA	NA	NA	7.5947	31.4129	-23.8182	615.96	-8.06443	13.822	58.7422	-44.9202	2302.43	-25.1408	#N/A
829	LOC112444488	121.286	41.5269	1.5463	71.7019	88.2434	-16.5415	365.775	-8.77777	NA	NA	NA	NA	NA	NA	NA	NA	NA	NA	#N/A
830	LOC112444501	50.8313	18.4515	1.46198	NA	NA	NA	NA	NA	NA	NA	NA	NA	NA	60.1836	81.3354	-21.1518	587.768	-9.66302	#N/A
831	LOC112444522	2.39231	6.3439	-1.40697	NA	NA	NA	NA	NA	72.125	35.5	36.625	1274.09	-11.5449	81.7336	61.6209	20.1127	293.114	-6.8364	#N/A
832	LOC112444727	3.98428	8.58312	-1.10718	84.6131	60.6938	23.9192	459.338	-9.36543	55.8204	35.2158	20.6046	387.112	-6.42987	NA	NA	NA	NA	NA	#N/A
833	LOC112444740	51.8503	20.2927	1.35339	59.1816	76.3804	-17.1988	390.633	-8.87746	79.9583	56.9167	23.0417	490.166	-8.96917	40.125	82.125	-42	2030.75	-22.6364	#N/A
834	LOC112444743	6.03034	37.8712	-2.65079	67.9342	29.8204	38.1138	1273.99	-20.2239	78.0591	59.0237	19.0353	333.246	-8.07097	NA	NA	NA	NA	NA	#N/A
835	LOC112444761	1.43605	7.27527	-2.3409	46.6432	36.2386	10.4046	67.1544	-6.3166	82.75	46.5	36.25	1250.7	-12.1891	NA	NA	NA	NA	NA	#N/A
836	LOC112444774	87.0091	22.6749	1.94007	66.4662	47.6879	18.7783	269.066	-10.0038	NA	NA	NA	NA	NA	NA	NA	NA	NA	NA	#N/A
837	LOC112444846	155.551	54.6043	1.5103	78.0574	53.8929	24.1645	471.733	-11.8577	NA	NA	NA	NA	NA	NA	NA	NA	NA	NA	#N/A
838	LOC112444864	4.00273	8.7702	-1.13162	82.0948	49.1269	32.9678	928.736	-15.0264	81.2232	52.7164	28.5068	760.192	-8.53352	NA	NA	NA	NA	NA	#N/A
839	LOC112444888	3.13742	6.97968	-1.15358	72.1293	35.8819	36.2474	1139.32	-17.5832	NA	NA	NA	NA	NA	NA	NA	NA	NA	NA	#N/A
840	LOC112444889	63.7308	21.3182	1.57991	43.6481	61.9719	-18.3237	436.971	-9.62525	NA	NA	NA	NA	NA	NA	NA	NA	NA	NA	#N/A
841	LOC112444895	5.27005	38.4147	-2.86577	NA	NA	NA	NA	NA	74.875	34.875	40	1532.07	-14.4717	77.2033	65.999	11.2043	74.0928	-7.47381	#N/A
842	LOC112444897	27.0653	80.1504	-1.56626	60.7253	48.9035	11.8217	88.7459	-5.41147	NA	NA	NA	NA	NA	NA	NA	NA	NA	NA	#N/A
843	LOC112444899	1.55534	7.63252	-2.29493	75.7108	49.8305	25.8803	550.847	-11.4229	65.4914	26.7109	38.7805	1435.55	-13.1292	57.2839	21.7673	35.5166	1059.43	-14.3305	#N/A
844	LOC112444924	101.061	31.3409	1.6891	NA	NA	NA	NA	NA	19.1988	74.6521	-55.4534	3185.03	-22.6765	58.3593	86.1259	-27.7666	952.339	-13.0625	#N/A
845	LOC112444928	3.04948	12.7847	-2.06778	NA	NA	NA	NA	NA	29.625	13.3125	16.3125	239.609	-6.62156	NA	NA	NA	NA	NA	#N/A
846	LOC112445107	1.4099	5.38022	-1.93208	NA	NA	NA	NA	NA	73.6852	59.0811	14.6041	189.544	-6.19444	NA	NA	NA	NA	NA	#N/A
847	LOC112445246	13.1838	5.68895	1.21254	NA	NA	NA	NA	NA	64.25	48.375	15.875	224.518	-6.83694	NA	NA	NA	NA	NA	#N/A
848	LOC112445525	1.99139	16.5954	-3.05894	NA	NA	NA	NA	NA	89.0863	41.9849	47.1014	2138.17	-18.0237	NA	NA	NA	NA	NA	#N/A
849	LOC112445543	15.4262	33.4505	-1.11664	74.5757	61.376	13.1997	115.239	-5.32656	NA	NA	NA	NA	NA	NA	NA	NA	NA	NA	#N/A
850	LOC112445619	6.14913	12.4703	-1.02005	78.03	63.7521	14.278	139.279	-5.54896	NA	NA	NA	NA	NA	NA	NA	NA	NA	NA	#N/A
851	LOC112445621	6.70602	26.8558	-2.00171	NA	NA	NA	NA	NA	NA	NA	NA	NA	NA	56.0206	37.7763	18.2444	234.664	-6.97047	#N/A
852	LOC112445648	17.9146	46.4819	-1.37553	83.1809	64.0332	19.1477	278.366	-7.36751	NA	NA	NA	NA	NA	NA	NA	NA	NA	NA	#N/A
853	LOC112445756	5.25138	10.6799	-1.02412	23.3866	63.0349	-39.6484	1777.97	-27.3584	NA	NA	NA	NA	NA	NA	NA	NA	NA	NA	#N/A
854	LOC112445785	7.50025	1171.54	-7.28726	84.5185	65.8043	18.7142	313.585	-28.0077	NA	NA	NA	NA	NA	NA	NA	NA	NA	NA	#N/A
855	LOC112445793	3.21779	8.00268	-1.31441	NA	NA	NA	NA	NA	10.875	30.4697	-19.5947	423.565	-7.9073	8.875	24.5	-15.625	349.721	-8.48844	#N/A
856	LOC112445843	9.09891	24.0024	-1.39941	NA	NA	NA	NA	NA	NA	NA	NA	NA	NA	62	45.2818	16.7182	188.702	-5.9421	#N/A
857	LOC112445852	5.21774	14.4693	-1.47149	NA	NA	NA	NA	NA	68.6944	51.227	17.4675	274.488	-6.07494	NA	NA	NA	NA	NA	#N/A
858	LOC112445927	5.21447	11.3455	-1.12152	40.9973	25.2799	15.7174	175.421	-6.01963	NA	NA	NA	NA	NA	NA	NA	NA	NA	NA	#N/A
859	LOC112445948	1.36707	6.51832	-2.25342	33.2861	22.0862	11.1999	79.9706	-6.27864	NA	NA	NA	NA	NA	NA	NA	NA	NA	NA	#N/A
860	LOC112445951	190.678	51.381	1.89183	NA	NA	NA	NA	NA	76	61	15	201.478	-8.02537	NA	NA	NA	NA	NA	#N/A
861	LOC112445973	9.18052	3.21574	1.51343	14.0675	29.7488	-15.6813	333.632	-8.37829	NA	NA	NA	NA	NA	NA	NA	NA	NA	NA	#N/A
862	LOC112445985	4.73267	11.7112	-1.30717	NA	NA	NA	NA	NA	56.7978	39.4633	17.3345	269.705	-5.91588	NA	NA	NA	NA	NA	#N/A
863	LOC112446007	34.1773	14.2394	1.26315	NA	NA	NA	NA	NA	11.3333	47.0083	-35.675	1343.59	-12.0028	NA	NA	NA	NA	NA	#N/A
864	LOC112446042	5.98223	12.3109	-1.04118	NA	NA	NA	NA	NA	NA	NA	NA	NA	NA	66.75	78.5917	-11.8417	222.244	-6.75129	#N/A
865	LOC112446387	1.9301	12.6851	-2.71639	83.875	61.5941	22.2809	397.541	-10.3964	44.7589	32.5625	12.1964	133.021	-7.4067	NA	NA	NA	NA	NA	#N/A
866	LOC112446475	9.29039	2.98181	1.63955	92.0491	73.7899	18.2592	251.282	-9.09141	89.375	60.625	28.75	775.872	-11.5754	84.2319	72.8351	11.3968	73.0251	-6.47693	#N/A
867	LOC112446653	35.7054	6.39918	2.48018	83.84	70.5606	13.2794	122.922	-9.19096	NA	NA	NA	NA	NA	NA	NA	NA	NA	NA	#N/A
868	LOC112446696	45.9168	18.0247	1.34905	NA	NA	NA	NA	NA	NA	NA	NA	NA	NA	92.5917	78.0278	14.5639	135.045	-6.68732	#N/A
869	LOC112446721	49.4479	15.5279	1.67104	92.2649	81.5285	10.7364	71.0084	-6.53277	NA	NA	NA	NA	NA	92.066	81.813	10.2531	55.3284	-6.30948	#N/A
870	LOC112446743	2.34748	22.2757	-3.24629	66.2403	54.7405	11.4998	90.4381	-8.53002	71.8542	54.347	17.5072	283.653	-9.25053	80.7917	68.4167	12.375	96.8003	-8.56044	#N/A
871	LOC112446758	4.59762	9.96316	-1.11572	NA	NA	NA	NA	NA	67.7777	31.6532	36.1246	1237.99	-11.271	72.266	29.2368	43.0292	1600.16	-18.6593	#N/A
872	LOC112446766	1.59817	8.92119	-2.48082	NA	NA	NA	NA	NA	31.1129	11.259	19.8539	362.699	-7.87778	43	12.3333	30.6667	768.76	-12.0701	#N/A
873	LOC112446780	61.1983	11.4917	2.4129	NA	NA	NA	NA	NA	94.3866	81.9569	12.4297	138.269	-8.82656	NA	NA	NA	NA	NA	#N/A
874	LOC112447025	1	19.0305	-4.25024	70.125	54.9375	15.1875	177.58	-12.3043	NA	NA	NA	NA	NA	NA	NA	NA	NA	NA	#N/A
875	LOC112447043	21.3261	9.63779	1.14585	NA	NA	NA	NA	NA	73.6058	86.396	-12.7902	190.542	-5.62042	NA	NA	NA	NA	NA	#N/A
876	LOC112447045	13.853	3.94086	1.81361	89.4985	78.7187	10.7797	72.2627	-6.82953	NA	NA	NA	NA	NA	NA	NA	NA	NA	NA	#N/A
877	LOC112447058	3.11746	58.9179	-4.24026	NA	NA	NA	NA	NA	72.6667	34.375	38.2917	1410.94	-17.1705	77	45.5	31.5	826.828	-16.5698	#N/A
878	LOC112447080	21.3332	5.23582	2.02661	43.3007	33.1845	10.1161	62.6069	-7.1217	NA	NA	NA	NA	NA	NA	NA	NA	NA	NA	#N/A
879	LOC112447093	1.65617	8.86804	-2.42076	78.1063	60.25	17.8563	240.715	-8.19268	NA	NA	NA	NA	NA	77.9045	59.231	18.6734	249.63	-7.73539	#N/A
880	LOC112447104	105.982	20.1927	2.39191	NA	NA	NA	NA	NA	12.3437	46.0313	-33.6875	1206.4	-12.4598	NA	NA	NA	NA	NA	#N/A
881	LOC112447110	17.5983	3.54102	2.3132	NA	NA	NA	NA	NA	74.0625	85.9375	-11.875	170.605	-7.3026	70.2524	84.7625	-14.5102	313.999	-8.54443	#N/A
882	LOC112447116	3.38041	8.63838	-1.35356	31.2648	46.5792	-15.3144	319.11	-8.96337	NA	NA	NA	NA	NA	NA	NA	NA	NA	NA	#N/A
883	LOC112447120	696.045	131.702	2.40191	84.1914	70.1301	14.0613	139.971	-9.24906	20.3479	36.3311	-15.9832	293.326	-7.98829	34.2292	56.2184	-21.9893	632.883	-11.2598	#N/A
884	LOC112447135	124.731	26.4295	2.2386	33.714	21.4255	12.2885	101.347	-8.23204	NA	NA	NA	NA	NA	69.6867	49.7619	19.9248	290.794	-10.4709	#N/A
885	LOC112447173	77.4912	15.3381	2.33692	61.7375	80.4248	-18.6873	455.443	-10.881	NA	NA	NA	NA	NA	0	22.75	-22.75	671.216	-11.4673	#N/A
886	LOC112447289	8.43582	2.07383	2.02423	NA	NA	NA	NA	NA	30	71.875	-41.875	1838.94	-15.3593	NA	NA	NA	NA	NA	#N/A
887	LOC112447295	104.24	21.8943	2.25128	NA	NA	NA	NA	NA	NA	NA	NA	NA	NA	80.3354	64.3336	16.0017	173.757	-9.11411	#N/A
888	LOC112447313	3.38939	14.973	-2.14326	NA	NA	NA	NA	NA	NA	NA	NA	NA	NA	7.66667	61.75	-54.0833	3266.97	-40.4795	#N/A
889	LOC112447323	92.8686	30.1989	1.62069	NA	NA	NA	NA	NA	56.5288	80.525	-23.9962	625.577	-8.35086	61.4307	72.5668	-11.136	204.037	-6.59811	#N/A
890	LOC112447333	54.7214	19.3787	1.49763	51.9598	39.5729	12.3869	100.292	-6.65818	NA	NA	NA	NA	NA	NA	NA	NA	NA	NA	#N/A
891	LOC112447353	11.9187	4.44682	1.42238	NA	NA	NA	NA	NA	12.5833	41.8125	-29.2292	913.417	-9.70839	NA	NA	NA	NA	NA	#N/A
892	LOC112447357	78.2502	19.4615	2.00747	53.9612	68.6384	-14.6772	299.999	-8.64234	18.4732	46.8839	-28.4107	866.858	-10.1018	NA	NA	NA	NA	NA	#N/A
893	LOC112447362	2.74219	5.90573	-1.10678	NA	NA	NA	NA	NA	89.1625	71.7292	17.4333	272.528	-5.803	NA	NA	NA	NA	NA	#N/A
894	LOC112447383	1	6.66502	-2.73661	80.6238	57.1519	23.4719	446.162	-10.962	76.925	62.8278	14.0972	179.482	-7.6168	NA	NA	NA	NA	NA	#N/A
895	LOC112447475	11.7411	3.42411	1.77776	NA	NA	NA	NA	NA	NA	NA	NA	NA	NA	64.8716	75.6381	-10.7665	194.275	-6.73672	#N/A
896	LOC112447525	15.468	3.23275	2.25846	NA	NA	NA	NA	NA	NA	NA	NA	NA	NA	9.65625	46.625	-36.9688	1606.38	-19.4173	#N/A
897	LOC112447526	2.93047	10.3287	-1.81746	22.7083	32.75	-10.0417	160.293	-7.56945	NA	NA	NA	NA	NA	NA	NA	NA	NA	NA	#N/A
898	LOC112447554	2.15023	8.62355	-2.00379	88.2849	64.2433	24.0416	467.115	-10.1077	NA	NA	NA	NA	NA	NA	NA	NA	NA	NA	#N/A
899	LOC112447601	73.2205	159.169	-1.12024	75.4325	41.7356	33.6969	973.658	-15.5701	NA	NA	NA	NA	NA	NA	NA	NA	NA	NA	#N/A
900	LOC112447727	3.05745	6.72885	-1.13803	77.2011	56.1208	21.0802	345.888	-8.02672	87.6903	67.5943	20.0959	367.44	-6.33652	NA	NA	NA	NA	NA	#N/A
901	LOC112447796	28.4786	7.12183	1.99956	60.4532	79.8035	-19.3503	482.423	-10.653	35.75	66.75	-31	1025.59	-10.9265	NA	NA	NA	NA	NA	#N/A
902	LOC112447818	11.4535	3.85587	1.57065	NA	NA	NA	NA	NA	1.85577	18.2886	-16.4328	305.211	-6.65242	NA	NA	NA	NA	NA	#N/A
903	LOC112447832	270.47	80.501	1.74839	80.6912	90.7702	-10.0789	162.042	-6.77814	61.2557	82.4907	-21.235	495.892	-7.836	NA	NA	NA	NA	NA	#N/A
904	LOC112447860	51.2493	3.73251	3.77931	NA	NA	NA	NA	NA	12.1063	26.7449	-14.6386	258.508	-11.6915	NA	NA	NA	NA	NA	#N/A
905	LOC112448017	2.22819	17.3824	-2.96369	NA	NA	NA	NA	NA	71.625	39.625	32	971.86	-11.7652	68.1042	31.5083	36.5958	1134.02	-15.9433	#N/A
906	LOC112448069	2.39231	12.4385	-2.37834	89.7678	78.1865	11.5813	87.2862	-6.56792	70.3447	40.1763	30.1684	858.528	-10.1695	84.6552	73.1856	11.4695	76.0773	-6.43675	#N/A
907	LOC112448082	3.07791	85.0363	-4.78806	88.0558	71.2685	16.7873	225.409	-14.687	72.9163	33.42	39.4963	1507.14	-19.463	93.7989	83.7546	10.0443	70.664	-13.8953	#N/A
908	LOC112448093	11.4634	27.7513	-1.27553	NA	NA	NA	NA	NA	NA	NA	NA	NA	NA	92.5	71	21.5	342.094	-7.17785	#N/A
909	LOC112448102	2.52827	8.85109	-1.8077	NA	NA	NA	NA	NA	66.625	30.5	36.125	1239.84	-11.5806	NA	NA	NA	NA	NA	#N/A
910	LOC112448105	96.8731	24.9782	1.95543	52.6391	71.1386	-18.4995	445.766	-10.1798	NA	NA	NA	NA	NA	NA	NA	NA	NA	NA	#N/A
911	LOC112448120	1.72516	6.9564	-2.01161	86.2232	70.5168	15.7063	177.653	-6.89659	NA	NA	NA	NA	NA	NA	NA	NA	NA	NA	#N/A
912	LOC112448135	27.9996	3.1264	3.16283	54.6882	70.9799	-16.2918	364.416	-11.6852	24.875	55.9042	-31.0292	1033.8	-13.1714	NA	NA	NA	NA	NA	#N/A
913	LOC112448140	10.702	4.33219	1.30471	NA	NA	NA	NA	NA	43.2944	66.3359	-23.0415	577.836	-7.78721	NA	NA	NA	NA	NA	#N/A
914	LOC112448381	129.142	39.7494	1.69995	62.2684	51.1956	11.0728	76.763	-6.67644	NA	NA	NA	NA	NA	NA	NA	NA	NA	NA	#N/A
915	LOC112448411	2.04169	8.73837	-2.0976	NA	NA	NA	NA	NA	NA	NA	NA	NA	NA	75	88	-13	261.076	-9.06325	#N/A
916	LOC112448454	3.4432	14.2139	-2.04548	NA	NA	NA	NA	NA	74.4	49.175	25.225	592.742	-8.33682	NA	NA	NA	NA	NA	#N/A
917	LOC112448457	3.04848	12.0601	-1.98408	NA	NA	NA	NA	NA	NA	NA	NA	NA	NA	60.625	29.375	31.25	799.255	-11.7287	#N/A
918	LOC112448482	9.54102	2.30566	2.04896	41.5678	74.7624	-33.1946	1279.54	-19.9172	36.925	70.425	-33.5	1191.82	-11.8761	NA	NA	NA	NA	NA	#N/A
919	LOC112448507	173.197	54.6114	1.66514	72.8218	52.9361	19.8858	305.258	-9.89967	74.4513	57.3072	17.1441	265.439	-8.00726	NA	NA	NA	NA	NA	#N/A
920	LOC112448513	2.11838	23.2877	-3.45854	NA	NA	NA	NA	NA	69.8917	48.4167	21.475	432.126	-10.4187	NA	NA	NA	NA	NA	#N/A
921	LOC112448534	1.90395	8.64893	-2.18353	NA	NA	NA	NA	NA	85.7786	69.9954	15.7831	224.085	-6.73331	NA	NA	NA	NA	NA	#N/A
922	LOC112448536	22.6589	10.1416	1.15979	89.2185	77.3839	11.8346	88.6864	-5.9465	91.0129	76.5715	14.4414	183.649	-6.45396	NA	NA	NA	NA	NA	#N/A
923	LOC112448549	10.5553	1.43379	2.88006	NA	NA	NA	NA	NA	76.375	87.6621	-11.2871	158.979	-8.61668	NA	NA	NA	NA	NA	#N/A
924	LOC112448627	4225.08	1744.26	1.27637	51.0491	39.3437	11.7054	86.612	-6.09078	NA	NA	NA	NA	NA	NA	NA	NA	NA	NA	#N/A
925	LOC112448639	13.6276	6.13765	1.15077	NA	NA	NA	NA	NA	22.4688	34.8929	-12.4241	180.627	-5.57591	NA	NA	NA	NA	NA	#N/A
926	LOC112448744	129.014	45.4434	1.50539	NA	NA	NA	NA	NA	83.1506	65.8632	17.2874	269.546	-7.70525	NA	NA	NA	NA	NA	#N/A
927	LOC112448745	11.5065	1.22754	3.2286	57.5651	78.4447	-20.8797	558.413	-13.878	16.3036	64.0828	-47.7792	2386.21	-20.232	NA	NA	NA	NA	NA	#N/A
928	LOC112448746	50.0309	7.53433	2.73127	NA	NA	NA	NA	NA	14.25	60.625	-46.375	2248.21	-18.5558	NA	NA	NA	NA	NA	#N/A
929	LOC112448753	15.2301	6.99873	1.12176	19.875	56.7886	-36.9136	1555.72	-22.656	NA	NA	NA	NA	NA	NA	NA	NA	NA	NA	#N/A
930	LOC112448766	124.099	42.984	1.52962	NA	NA	NA	NA	NA	46.5553	60.1577	-13.6024	214.666	-6.16324	NA	NA	NA	NA	NA	#N/A
931	LOC112448777	80.789	34.1625	1.24174	65.325	49.8125	15.5125	171.036	-7.23681	NA	NA	NA	NA	NA	NA	NA	NA	NA	NA	#N/A
932	LOC112448782	76.8818	12.1638	2.66005	NA	NA	NA	NA	NA	6.70833	32.8333	-26.125	741.089	-10.6043	NA	NA	NA	NA	NA	#N/A
933	LOC112448791	121.785	17.5694	2.7932	54.5666	69.4354	-14.8689	310.628	-10.2434	9.5	44.125	-34.625	1274.43	-13.5451	37.6246	50.5549	-12.9303	263.632	-9.18357	#N/A
934	LOC112448814	3.9039	12.7681	-1.70956	67.9407	41.7579	26.1828	562.908	-10.9269	NA	NA	NA	NA	NA	61.4167	45.3833	16.0333	171.311	-6.1029	#N/A
935	LOC112448823	27.5597	7.39827	1.8973	NA	NA	NA	NA	NA	NA	NA	NA	NA	NA	47.5069	66.1263	-18.6194	473.242	-9.16227	#N/A
936	LOC112448825	4.29862	13.8504	-1.68798	NA	NA	NA	NA	NA	70.25	51.6875	18.5625	312.475	-6.48245	NA	NA	NA	NA	NA	#N/A
937	LOC112448841	10.3885	5.18283	1.00317	NA	NA	NA	NA	NA	88.0747	77.2026	10.8721	99.7134	-5.60228	NA	NA	NA	NA	NA	#N/A
938	LOC112448848	16.4369	3.50069	2.23123	NA	NA	NA	NA	NA	18.1142	38.0637	-19.9495	442.565	-8.33156	NA	NA	NA	NA	NA	#N/A
939	LOC112448940	16.3711	33.4799	-1.03215	NA	NA	NA	NA	NA	33.6	79	-45.4	2149.37	-18.5882	NA	NA	NA	NA	NA	#N/A
940	LOC112449053	20.1988	48.4569	-1.26243	NA	NA	NA	NA	NA	80.1667	49.3057	30.861	895.741	-9.34524	NA	NA	NA	NA	NA	#N/A
941	LOC112449059	3.18024	10.1716	-1.67734	NA	NA	NA	NA	NA	62.294	24.6911	37.603	1345.57	-12.0802	NA	NA	NA	NA	NA	#N/A
942	LOC112449072	9.01637	155.739	-4.11044	78.5714	89.4236	-10.8522	194.205	-14.7737	NA	NA	NA	NA	NA	NA	NA	NA	NA	NA	#N/A
943	LOC112449074	4.1176	16.0936	-1.96661	NA	NA	NA	NA	NA	70.1238	26.6733	43.4505	1809.36	-14.8736	NA	NA	NA	NA	NA	#N/A
944	LOC112449100	284.572	67.5497	2.07477	NA	NA	NA	NA	NA	30.6607	53.3589	-22.6981	564.305	-8.65575	NA	NA	NA	NA	NA	#N/A
945	LOC112449179	4.23542	9.41888	-1.15305	78.0381	63.5176	14.5205	145.297	-5.69119	NA	NA	NA	NA	NA	NA	NA	NA	NA	NA	#N/A
946	LOC112449300	201.977	73.4573	1.45922	NA	NA	NA	NA	NA	NA	NA	NA	NA	NA	59.5522	31.5201	28.0321	627.215	-12.237	#N/A
947	LOC112449301	68.7853	19.0066	1.8556	38.0648	66.8519	-28.7871	983.435	-16.246	17.2692	68.2298	-50.9605	2699.01	-20.0077	NA	NA	NA	NA	NA	#N/A
948	LOC112449306	102.974	16.9541	2.60257	NA	NA	NA	NA	NA	NA	NA	NA	NA	NA	74.0343	84.6583	-10.624	194.208	-8.25968	#N/A
949	LOC112449340	8.89341	17.84	-1.0043	NA	NA	NA	NA	NA	NA	NA	NA	NA	NA	79.3	57.7083	21.5917	344.945	-7.0851	#N/A
950	LOC112449349	105.35	45.9291	1.1977	15.058	25.1294	-10.0713	160.065	-6.11662	40.9588	67.2848	-26.326	745.942	-8.62404	90.8018	74.0686	16.7332	189.324	-7.03987	#N/A
951	LOC112449354	2.45929	15.5921	-2.6645	68.6794	54.2926	14.3868	147.424	-7.6906	62.6194	33.1786	29.4408	817.902	-10.4263	70.2293	33.8278	36.4014	1119.42	-15.335	#N/A
952	LOC112449372	1.49405	7.30925	-2.29049	83.129	71.8193	11.3097	82.0485	-6.36228	67.6667	26.875	40.7917	1591.73	-13.9742	NA	NA	NA	NA	NA	#N/A
953	LOC112449414	9.80876	1.45509	2.75297	65.9664	89.2072	-23.2408	671.448	-14.0371	NA	NA	NA	NA	NA	NA	NA	NA	NA	NA	#N/A
954	LOC112449547	11.737	53.1351	-2.1786	NA	NA	NA	NA	NA	66.9563	45.9707	20.9855	405.436	-7.57768	NA	NA	NA	NA	NA	#N/A
955	LOC112449616	17.3721	8.44034	1.0414	68.0752	81.7532	-13.678	263.42	-7.16949	28.5479	44.3377	-15.7897	281.727	-5.99977	73.3295	58.3774	14.9521	143.321	-6.28977	#N/A
956	LOC112449619	11.3766	5.65921	1.0074	73.9407	49.2562	24.6845	493.11	-11.2031	54.125	11.875	42.25	1706.79	-16.3107	69.7042	47.6495	22.0548	362.919	-8.58812	#N/A
957	LOC281376	587.703	98.2223	2.58096	NA	NA	NA	NA	NA	43.8333	22.1667	21.6667	436.502	-11.7412	NA	NA	NA	NA	NA	1
958	LOC404103	75.999	178.696	-1.23346	NA	NA	NA	NA	NA	28.2113	41.6393	-13.428	207.989	-6.29751	NA	NA	NA	NA	NA	#N/A
959	LOC407145	34.378	12.2294	1.49113	83.8183	65.3339	18.4844	257.918	-8.88881	NA	NA	NA	NA	NA	NA	NA	NA	NA	NA	#N/A
960	LOC407171	2369.49	628.461	1.91468	43.9174	56.7047	-12.7872	238.218	-7.83291	4.675	36.8639	-32.1889	1102.62	-11.2294	11.7708	56.6875	-44.9167	2303.98	-25.3501	1
961	LOC407201	3.05176	12.3598	-2.01794	NA	NA	NA	NA	NA	82.9	55.9167	26.9833	681.087	-8.76266	85.5	67	18.5	242.563	-7.05533	#N/A
962	LOC504599	18.4207	63.5381	-1.78629	59.497	48.0573	11.4396	82.4467	-5.60362	NA	NA	NA	NA	NA	NA	NA	NA	NA	NA	#N/A
963	LOC504730	1.49405	5.21006	-1.80207	NA	NA	NA	NA	NA	NA	NA	NA	NA	NA	91	79.25	11.75	78.6387	-5.51527	#N/A
964	LOC504773	243.142	90.653	1.42337	32.3163	46.4436	-14.1273	279.222	-7.66999	NA	NA	NA	NA	NA	NA	NA	NA	NA	NA	#N/A
965	LOC504861	337.771	143.352	1.23648	NA	NA	NA	NA	NA	62.8542	34.1054	28.7488	774.528	-10.6718	NA	NA	NA	NA	NA	#N/A
966	LOC506121	75.2468	15.9297	2.23991	83.4951	71.5501	11.945	94.7515	-8.1308	NA	NA	NA	NA	NA	NA	NA	NA	NA	NA	#N/A
967	LOC506868	15.786	7.64527	1.04601	83.1982	68.3363	14.8619	154.032	-6.70307	60.4317	50.0632	10.3684	90.0756	-5.58808	44.2625	61.808	-17.5455	425.134	-7.94069	#N/A
968	LOC507055	270.676	119.183	1.18338	NA	NA	NA	NA	NA	11.7083	36.75	-25.0417	677.485	-8.23773	NA	NA	NA	NA	NA	#N/A
969	LOC507247	195.64	63.9263	1.61372	NA	NA	NA	NA	NA	64.8856	82.9923	-18.1067	366.367	-7.00981	NA	NA	NA	NA	NA	#N/A
970	LOC507527	11.4779	3.87282	1.56741	NA	NA	NA	NA	NA	65.5625	39.1333	26.4292	651.981	-10.5496	79.2469	64.7862	14.4607	133.374	-7.06889	#N/A
971	LOC508459	4816.15	1184.33	2.02381	NA	NA	NA	NA	NA	16.6875	46.4125	-29.725	945.842	-10.5384	NA	NA	NA	NA	NA	#N/A
972	LOC508666	3745.52	1458.96	1.36022	63.4365	75.3423	-11.9058	210.049	-6.82941	25.3144	72.3091	-46.9947	2301.24	-17.4957	54.7513	69.7819	-15.0306	328.766	-7.33747	2
973	LOC508879	52.7321	625.727	-3.56878	30.7235	46.6078	-15.8843	349.996	-15.1551	76.9792	44.9972	31.982	974.518	-13.1703	62.8002	42.5074	20.2928	309.439	-10.7747	#N/A
974	LOC509374	2.77783	7.10313	-1.3545	NA	NA	NA	NA	NA	46.4	32.2583	14.1417	175.403	-5.46879	65.7	42.9792	22.7208	388.845	-7.63539	#N/A
975	LOC509513	75.5725	206.858	-1.45271	NA	NA	NA	NA	NA	72.0083	82.5167	-10.5083	133.064	-6.07956	NA	NA	NA	NA	NA	#N/A
976	LOC509854	4.51546	14.0672	-1.63939	82.5932	71.57	11.0232	74.7225	-5.34676	57.5833	79.3039	-21.7206	516.314	-9.13518	NA	NA	NA	NA	NA	#N/A
977	LOC509972	1054.61	443.179	1.25075	NA	NA	NA	NA	NA	48.1875	62.9375	-14.75	248.533	-6.01134	NA	NA	NA	NA	NA	#N/A
978	LOC510369	3.95043	59.0739	-3.90244	72.4785	55.2042	17.2743	232.119	-11.6426	57.732	20.5668	37.1652	1325.44	-15.7618	74.0658	52.7969	21.2689	346.474	-12.0106	#N/A
979	LOC510382	150.53	55.8176	1.43125	69.9052	80.3246	-10.4194	169.627	-6.45818	3.33333	21.5	-18.1667	368.046	-6.80473	NA	NA	NA	NA	NA	#N/A
980	LOC510520	820.378	268.043	1.61382	NA	NA	NA	NA	NA	47.5472	78.9556	-31.4083	1050.35	-10.6236	NA	NA	NA	NA	NA	#N/A
981	LOC511175	1.6913	10.4884	-2.63259	NA	NA	NA	NA	NA	NA	NA	NA	NA	NA	70.4375	80.875	-10.4375	187.822	-9.54948	1
982	LOC511531	311.136	136.196	1.19186	48.9958	61.406	-12.4102	224.364	-6.83497	13.9375	35.25	-21.3125	497.538	-7.26438	NA	NA	NA	NA	NA	#N/A
983	LOC511617	66.485	157.832	-1.24729	NA	NA	NA	NA	NA	58.2667	42.2833	15.9833	227.126	-5.64933	NA	NA	NA	NA	NA	#N/A
984	LOC512541	13.4355	6.09297	1.14083	NA	NA	NA	NA	NA	NA	NA	NA	NA	NA	53.0536	63.7448	-10.6912	190.163	-5.9746	#N/A
985	LOC512627	84.3647	21.8223	1.95084	NA	NA	NA	NA	NA	57.1696	39.75	17.4196	275.555	-8.74053	NA	NA	NA	NA	NA	#N/A
986	LOC512869	8.05814	18.4216	-1.19288	NA	NA	NA	NA	NA	57.35	28.4583	28.8917	781.671	-8.67488	NA	NA	NA	NA	NA	#N/A
987	LOC513941	18.1083	3.54753	2.35176	87.5044	76.1444	11.3599	84.5991	-8.24388	93	57.5	35.5	1199.75	-16.5453	NA	NA	NA	NA	NA	#N/A
988	LOC513969	5.03345	26.6819	-2.40624	NA	NA	NA	NA	NA	93.4444	82.6425	10.8019	102.109	-6.64753	NA	NA	NA	NA	NA	#N/A
989	LOC514257	45.4389	16.7885	1.43646	78.0729	62.0519	16.021	185.1	-7.76779	76.1042	44.3167	31.7875	953.282	-12.3056	NA	NA	NA	NA	NA	#N/A
990	LOC515150	28.2107	12.704	1.15095	89.1921	78.917	10.2751	62.009	-5.5454	75.4063	64.0188	11.3875	110.566	-5.89696	82.8123	69.7556	13.0567	102.025	-5.98825	#N/A
991	LOC516849	16.3738	337.266	-4.36443	86.2343	69.1162	17.1181	231.213	-13.1596	76.75	42.5	34.25	1126.49	-16.2362	NA	NA	NA	NA	NA	#N/A
992	LOC518134	113.286	30.791	1.87938	NA	NA	NA	NA	NA	10.125	42.5	-32.375	1114.85	-11.253	NA	NA	NA	NA	NA	#N/A
993	LOC527744	3267.62	772.37	2.08087	64.5921	75.6416	-11.0495	188.79	-7.57588	NA	NA	NA	NA	NA	NA	NA	NA	NA	NA	#N/A
994	LOC529196	101.808	46.304	1.13664	72.9125	55.7386	17.1738	216.723	-7.7011	NA	NA	NA	NA	NA	NA	NA	NA	NA	NA	#N/A
995	LOC530929	94.0442	256.053	-1.44503	47.9948	32.9715	15.0233	158.301	-6.05285	NA	NA	NA	NA	NA	72.7994	53.7779	19.0216	257.141	-6.55722	#N/A
996	LOC531296	14.2806	95.4893	-2.74128	76.331	54.2071	22.1239	391.484	-10.3772	91	75.75	15.25	211.14	-7.74816	69.1354	53.7542	15.3813	159.09	-7.70445	#N/A
997	LOC536097	479.987	164.048	1.54888	NA	NA	NA	NA	NA	9.5	49.75	-40.25	1700.55	-14.1764	NA	NA	NA	NA	NA	#N/A
998	LOC540321	1.16212	8.14935	-2.80993	NA	NA	NA	NA	NA	NA	NA	NA	NA	NA	91.4359	76.1051	15.3308	158.21	-7.84816	#N/A
999	LOC613282	1.20495	10.9497	-3.18386	80.0281	67.2205	12.8076	115.283	-8.57553	53.575	18.9583	34.6167	1142.48	-13.079	76.6443	51.2544	25.39	508.821	-11.2672	#N/A
1000	LOC613699	79.3054	26.6379	1.57394	92.375	73.5833	18.7917	268.108	-9.19359	50.3623	73.3695	-23.0072	577.043	-8.04409	NA	NA	NA	NA	NA	#N/A
1001	LOC613822	143.846	69.5727	1.04794	89.1706	78.0396	11.131	75.7794	-5.60595	NA	NA	NA	NA	NA	NA	NA	NA	NA	NA	#N/A
1002	LOC614781	7.39649	91.2067	-3.62423	NA	NA	NA	NA	NA	NA	NA	NA	NA	NA	77.4719	66.6129	10.859	73.2816	-9.56692	#N/A
1003	LOC614923	17.374	5.82061	1.57768	NA	NA	NA	NA	NA	26.9667	40.4375	-13.4708	211.017	-6.20926	57.9167	44.4167	13.5	112.388	-6.84028	#N/A
1004	LOC615223	4.38825	28.4889	-2.69868	74.2242	50.7523	23.4719	445.967	-10.8911	80.6061	64.9424	15.6637	222.922	-7.70233	NA	NA	NA	NA	NA	#N/A
1005	LOC615514	2.81738	12.8125	-2.18513	82.8245	60.0559	22.7686	414.618	-9.73866	71.0157	42.738	28.2777	750.799	-9.33844	87.8458	65.8403	22.0055	363.906	-8.26666	2
1006	LOC615559	6.06967	16.0472	-1.40264	NA	NA	NA	NA	NA	63	47.7917	15.2083	204.796	-5.6585	NA	NA	NA	NA	NA	#N/A
1007	LOC615948	4.71471	12.2875	-1.38195	NA	NA	NA	NA	NA	60.75	47.625	13.125	149.687	-5.36598	78.5417	58.875	19.6667	278.018	-6.68818	#N/A
1008	LOC616138	1.32424	9.56553	-2.85268	61.7946	47.1179	14.6768	155.379	-8.16175	NA	NA	NA	NA	NA	82.0833	66.3333	15.75	168.92	-8.01465	#N/A
1009	LOC616782	684.417	218.893	1.64465	86.5795	67.3598	19.2197	282.48	-9.53892	NA	NA	NA	NA	NA	NA	NA	NA	NA	NA	#N/A
1010	LOC616957	3.82544	9.42319	-1.30059	NA	NA	NA	NA	NA	88.9028	75.0883	13.8145	166.753	-5.38015	NA	NA	NA	NA	NA	#N/A
1011	LOC617141	15.4745	6.24822	1.30838	NA	NA	NA	NA	NA	NA	NA	NA	NA	NA	78.3106	62.4391	15.8715	166.774	-6.97649	#N/A
1012	LOC617785	36.0068	17.348	1.0535	NA	NA	NA	NA	NA	66.7917	79.4333	-12.6417	186.252	-5.5169	NA	NA	NA	NA	NA	#N/A
1013	LOC618268	116.428	44.4778	1.38828	93.2086	79.4778	13.7308	128.3	-6.87571	88.5625	71.3958	17.1667	265.244	-7.44588	NA	NA	NA	NA	NA	#N/A
1014	LOC618565	11.4967	71.8423	-2.64361	NA	NA	NA	NA	NA	77.0268	34.0397	42.9871	1773.11	-15.4091	NA	NA	NA	NA	NA	#N/A
1015	LOC618686	6.63662	15.7324	-1.24522	25.974	44.0598	-18.0857	425.327	-10.2106	NA	NA	NA	NA	NA	NA	NA	NA	NA	NA	#N/A
1016	LOC619159	316.471	85.4308	1.88925	NA	NA	NA	NA	NA	58.7703	84.2815	-25.5112	704.491	-9.09469	NA	NA	NA	NA	NA	#N/A
1017	LOC781726	103.594	33.0721	1.64725	82.15	59.0267	23.1233	428.196	-11.558	90.25	79.8333	10.4167	92.7822	-6.62062	NA	NA	NA	NA	NA	#N/A
1018	LOC781951	9.83227	60.6743	-2.62549	NA	NA	NA	NA	NA	NA	NA	NA	NA	NA	73.8333	92.3333	-18.5	470.099	-12.8134	#N/A
1019	LOC781977	54.9207	114.073	-1.05454	52.3328	33.4354	18.8975	269.418	-7.08813	NA	NA	NA	NA	NA	NA	NA	NA	NA	NA	2
1020	LOC782437	17.9779	46.2978	-1.36472	NA	NA	NA	NA	NA	52.1032	84.9311	-32.828	1142.63	-12.7776	NA	NA	NA	NA	NA	#N/A
1021	LOC782545	1.699	6.61606	-1.96129	66.0095	34.1787	31.8307	863.077	-14.6538	NA	NA	NA	NA	NA	76.7636	66.2255	10.5381	59.5484	-5.61748	#N/A
1022	LOC783399	3.9076	10.4757	-1.42269	NA	NA	NA	NA	NA	78	38.625	39.375	1477.89	-12.7116	NA	NA	NA	NA	NA	#N/A
1023	LOC783508	3.96432	14.5522	-1.87609	NA	NA	NA	NA	NA	NA	NA	NA	NA	NA	55.3193	36.3323	18.987	257.347	-6.99191	#N/A
1024	LOC784038	9.27254	191.595	-4.36895	83.0403	68.5127	14.5277	162.272	-12.6	NA	NA	NA	NA	NA	NA	NA	NA	NA	NA	#N/A
1025	LOC785982	6.75149	1.57841	2.09674	31.4446	45.9946	-14.55	296.035	-8.74004	NA	NA	NA	NA	NA	NA	NA	NA	NA	NA	#N/A
1026	LOC786254	2.09222	7.13503	-1.76988	NA	NA	NA	NA	NA	77.1667	66.6667	10.5	93.7824	-5.55433	86.625	75.8333	10.7917	62.7552	-5.36291	#N/A
1027	LOC786297	3.68378	8.47259	-1.20162	NA	NA	NA	NA	NA	49	23.375	25.625	609.827	-7.71092	NA	NA	NA	NA	NA	#N/A
1028	LOC786348	586.974	267.992	1.13111	NA	NA	NA	NA	NA	19.5889	45.7187	-26.1299	735.107	-8.52267	NA	NA	NA	NA	NA	#N/A
1029	LOC786914	2.18736	8.02172	-1.87472	74.1829	57.6769	16.506	198.909	-6.9488	NA	NA	NA	NA	NA	NA	NA	NA	NA	NA	2
1030	LOC787803	85.6767	236.466	-1.46466	NA	NA	NA	NA	NA	82.3489	63.5113	18.8376	321.599	-6.31309	NA	NA	NA	NA	NA	#N/A
1031	LOC788334	52.4937	19.7871	1.40758	NA	NA	NA	NA	NA	NA	NA	NA	NA	NA	40.5351	51.4494	-10.9142	197.093	-6.28911	#N/A
1032	LOC788915	4.38078	13.3741	-1.61019	NA	NA	NA	NA	NA	89.3182	77.5524	11.7657	119.06	-5.46029	79.8893	43.9	35.9893	1087.88	-14.0258	#N/A
1033	LOC789029	1.65617	11.1413	-2.75	NA	NA	NA	NA	NA	62.25	38.75	23.5	515.15	-9.10507	73.9167	53.8333	20.0833	297.313	-8.7153	#N/A
1034	LOC789192	3.71513	7.6665	-1.04516	NA	NA	NA	NA	NA	33.75	57.25	-23.5	598.749	-8.65763	NA	NA	NA	NA	NA	#N/A
1035	LOC789733	3.0313	6.67347	-1.1385	NA	NA	NA	NA	NA	NA	NA	NA	NA	NA	76.0405	37.4636	38.5769	1263.93	-15.5334	#N/A
1036	LOC789748	32.3912	4.43225	2.86949	NA	NA	NA	NA	NA	0	39.5	-39.5	1645.53	-15.6133	3.8	19.275	-15.475	351.835	-10.0032	#N/A
1037	LOC790181	303.42	143.346	1.08181	NA	NA	NA	NA	NA	35.5556	50.6	-15.0444	257.423	-5.90467	NA	NA	NA	NA	NA	#N/A
1038	LOC790255	2216.95	944.527	1.23091	57	33	24	463.786	-11.2018	NA	NA	NA	NA	NA	NA	NA	NA	NA	NA	#N/A
1039	LONRF2	22.9784	92.713	-2.01249	NA	NA	NA	NA	NA	NA	NA	NA	NA	NA	82.9833	60.7417	22.2417	372.242	-8.10456	#N/A
1040	LPAR5	117.027	45.0133	1.37842	NA	NA	NA	NA	NA	44.4792	7.41667	37.0625	1306.23	-14.5269	48.45	18.1861	30.2639	743.504	-13.2779	2
1041	LPO	118.477	3297.35	-4.79862	NA	NA	NA	NA	NA	NA	NA	NA	NA	NA	75.75	55.6042	20.1458	314.332	-14.9803	1
1042	LRFN1	232.126	81.3384	1.5129	59.3321	37.7962	21.5359	364.802	-10.4061	NA	NA	NA	NA	NA	NA	NA	NA	NA	NA	#N/A
1043	LRP1	19964.2	7566.15	1.39978	NA	NA	NA	NA	NA	20.1691	31.741	-11.5719	159.261	-5.74221	NA	NA	NA	NA	NA	#N/A
1044	LRP2BP	87.0786	24.6993	1.81785	60.1709	33.2749	26.896	598.614	-14.2803	50.7187	17.0804	33.6384	1072.2	-14.0664	NA	NA	NA	NA	NA	#N/A
1045	LRRC26	12.0345	151.452	-3.65362	75.3397	44.9808	30.3589	787.928	-16.6682	NA	NA	NA	NA	NA	NA	NA	NA	NA	NA	#N/A
1046	LRRC4	9.35859	47.5533	-2.34518	35.3274	17.4599	17.8676	240.725	-8.06769	NA	NA	NA	NA	NA	NA	NA	NA	NA	NA	#N/A
1047	LRRTM2	3.5012	7.69849	-1.13672	90.0791	76.058	14.0211	133.516	-5.54671	89.8504	67.0101	22.8403	480.04	-6.95836	NA	NA	NA	NA	NA	#N/A
1048	LST1	238.13	115.518	1.04363	NA	NA	NA	NA	NA	38.5568	72.431	-33.8742	1214.34	-11.1809	20.3914	38.0833	-17.6919	431.176	-7.99286	#N/A
1049	LTB4R	292.622	117.354	1.31817	NA	NA	NA	NA	NA	13.553	39.5844	-26.0314	730.295	-8.62439	21.762	53.8799	-32.1179	1238.14	-15.3822	1
1050	LTF	876.069	9336.61	-3.41378	NA	NA	NA	NA	NA	87.5	76.5208	10.9792	111.2	-9.16667	NA	NA	NA	NA	NA	1
1051	LURAP1L	63.8786	230.172	-1.84931	31.2507	42.4308	-11.1801	190.27	-8.05668	NA	NA	NA	NA	NA	NA	NA	NA	NA	NA	3
1052	LY86	223.357	92.3024	1.27491	NA	NA	NA	NA	NA	52.9911	39.8745	13.1166	149.978	-6.39341	NA	NA	NA	NA	NA	#N/A
1053	LYL1	166.49	69.5171	1.25999	NA	NA	NA	NA	NA	18.6675	71.3311	-52.6636	2876.7	-20.7943	14.8611	50.1541	-35.293	1471.31	-17.4867	7
1054	LYST	10380.6	4274.95	1.27992	34.1866	23.5378	10.6489	68.3054	-5.82668	NA	NA	NA	NA	NA	NA	NA	NA	NA	NA	1
1055	MAB21L1	3.39887	15.8726	-2.22341	42.6914	27.9558	14.7357	153.807	-6.95994	NA	NA	NA	NA	NA	NA	NA	NA	NA	NA	#N/A
1056	MAML2	2118.97	632.761	1.74363	NA	NA	NA	NA	NA	39.5798	19.5677	20.0122	366.831	-8.93123	NA	NA	NA	NA	NA	38
1057	MANSC4	8.22681	288.573	-5.13246	NA	NA	NA	NA	NA	77.3376	56.0297	21.3079	439.184	-16.4295	84.6625	64.1113	20.5512	331.588	-16.4638	#N/A
1058	MAP3K19	8.82357	19.309	-1.12984	81.6413	62.7746	18.8667	268.551	-7.11067	86.25	49.875	36.375	1255.69	-11.3746	NA	NA	NA	NA	NA	#N/A
1059	MAP3K21	49.599	396.131	-2.99759	NA	NA	NA	NA	NA	NA	NA	NA	NA	NA	76.4924	64.0834	12.409	95.9539	-7.90891	#N/A
1060	MAPK13	51.8311	466.82	-3.17098	NA	NA	NA	NA	NA	NA	NA	NA	NA	NA	61.04	18.9706	42.0694	1532.55	-19.7111	3
1061	2023-03-01	109.87	2682.82	-4.60988	NA	NA	NA	NA	NA	NA	NA	NA	NA	NA	41.1765	23.3382	17.8383	238.984	-13.811	#N/A
1062	2023-03-01	162.121	73.7325	1.1367	NA	NA	NA	NA	NA	9.28125	33.35	-24.0687	627.728	-7.93368	NA	NA	NA	NA	NA	#N/A
1063	MASP1	9.02737	109.962	-3.60655	NA	NA	NA	NA	NA	89.1667	58.5222	30.6444	893.56	-12.8861	NA	NA	NA	NA	NA	1
1064	MATN2	3.79906	14.5902	-1.94128	43.2472	23.8401	19.4071	288.776	-8.02139	NA	NA	NA	NA	NA	NA	NA	NA	NA	NA	1
1065	MATN3	11.9095	5.08277	1.22843	56.5162	33.614	22.9022	417.799	-10.5804	NA	NA	NA	NA	NA	NA	NA	NA	NA	NA	#N/A
1066	MCEMP1	704.713	161.362	2.12674	NA	NA	NA	NA	NA	NA	NA	NA	NA	NA	8.72917	21.0625	-12.3333	241.454	-7.65405	#N/A
1067	MED17	303.292	668.234	-1.13965	NA	NA	NA	NA	NA	NA	NA	NA	NA	NA	33.5744	16.9595	16.6149	185.301	-5.73238	#N/A
1068	METTL9	608.722	1450.93	-1.25312	NA	NA	NA	NA	NA	12.5	32.625	-20.125	445.5	-7.95705	NA	NA	NA	NA	NA	1
1069	MFGE8	692.383	12802.5	-4.20871	64.802	45.425	19.377	301.029	-13.2608	84.6518	58.1146	26.5372	671.058	-13.7079	82.6085	60.1287	22.4798	394.485	-13.3218	#N/A
1070	MFSD4A	44.2956	932.944	-4.39656	NA	NA	NA	NA	NA	NA	NA	NA	NA	NA	69.7182	52.096	17.6222	230.776	-12.9599	#N/A
1071	MFSD4B	106.674	46.8718	1.18641	NA	NA	NA	NA	NA	NA	NA	NA	NA	NA	62.6053	42.8487	19.7566	281.241	-8.02048	#N/A
1072	MGAM	164.549	53.1804	1.62955	68.3608	57.6023	10.7584	71.2225	-6.45888	NA	NA	NA	NA	NA	NA	NA	NA	NA	NA	#N/A
1073	MGAT3	10.7184	21.6994	-1.01756	NA	NA	NA	NA	NA	25.85	53.7607	-27.9107	833.864	-10.1479	NA	NA	NA	NA	NA	#N/A
1074	MGC137055	4.99612	12.8233	-1.35989	NA	NA	NA	NA	NA	40.2949	20.5699	19.725	353.863	-6.40021	NA	NA	NA	NA	NA	#N/A
1075	MGC157082	199.583	72.656	1.45784	NA	NA	NA	NA	NA	7.04167	39.6667	-32.625	1130.05	-10.9296	NA	NA	NA	NA	NA	#N/A
1076	MGLL	906.539	261.164	1.79541	NA	NA	NA	NA	NA	46.1495	64.8971	-18.7475	391.878	-7.38004	NA	NA	NA	NA	NA	#N/A
1077	MGP	5.27903	26.1204	-2.30683	80.9599	70.3599	10.6	70.1294	-6.2818	82.8036	46.375	36.4286	1263.19	-12.2128	NA	NA	NA	NA	NA	#N/A
1078	MICALL2	20.9609	87.29	-2.05812	35.6653	18.5012	17.1641	218.433	-7.39881	NA	NA	NA	NA	NA	59.0261	35.1086	23.9174	439.582	-8.72283	7
1079	MID1	83.6848	1013.89	-3.59879	NA	NA	NA	NA	NA	79.308	54.6804	24.6276	572.41	-11.4058	NA	NA	NA	NA	NA	#N/A
1080	MISP3	10.5938	33.0245	-1.64031	87.1934	75.35	11.8434	89.3657	-5.49911	NA	NA	NA	NA	NA	NA	NA	NA	NA	NA	#N/A
1081	MMP14	2629.51	993.211	1.40462	NA	NA	NA	NA	NA	NA	NA	NA	NA	NA	40.0691	26.9813	13.0878	103.369	-6.41605	1
1082	MMP19	13314.3	5899.89	1.17422	NA	NA	NA	NA	NA	69.1042	80.1417	-11.0375	145.514	-5.42803	NA	NA	NA	NA	NA	#N/A
1083	MMP25	2326.13	492.757	2.23898	NA	NA	NA	NA	NA	NA	NA	NA	NA	NA	29.1125	47.0138	-17.9013	444.163	-9.44138	#N/A
1084	MMP9	769.395	383.018	1.00631	NA	NA	NA	NA	NA	10.4	23.45	-13.05	197.41	-5.53504	NA	NA	NA	NA	NA	#N/A
1085	MOB3C	348.997	134.949	1.3708	27.8333	42.9515	-15.1181	313.008	-8.00245	NA	NA	NA	NA	NA	NA	NA	NA	NA	NA	#N/A
1086	MPL	4.35043	16.7954	-1.94883	NA	NA	NA	NA	NA	23.5	59.5	-36	1368.76	-15.6382	29.5903	72.5	-42.9097	2114.55	-28.1297	1
1087	MROH6	17.362	45.1561	-1.37899	NA	NA	NA	NA	NA	53.4806	34.0833	19.3973	341.714	-6.34983	NA	NA	NA	NA	NA	#N/A
1088	MRPL14	146.809	339.047	-1.20755	49.0764	33.2348	15.8416	178.893	-6.10993	NA	NA	NA	NA	NA	NA	NA	NA	NA	NA	4
1089	MS4A3	1.65617	6.03514	-1.86554	NA	NA	NA	NA	NA	13.3333	69.425	-56.0917	3257.03	-27.8013	66.1749	82.2214	-16.0465	367.231	-9.72428	#N/A
1090	MS4A7	31.6759	14.9959	1.07882	NA	NA	NA	NA	NA	86.7083	73.433	13.2753	153.345	-6.10747	NA	NA	NA	NA	NA	#N/A
1091	MS4A8	233.044	96.1914	1.27662	90.5083	64.5833	25.925	550.362	-12.4455	NA	NA	NA	NA	NA	NA	NA	NA	NA	NA	#N/A
1092	MSR1	2475.17	1099.24	1.17102	NA	NA	NA	NA	NA	6.125	19.1875	-13.0625	198.167	-5.68203	NA	NA	NA	NA	NA	#N/A
1093	MST1R	10.4626	31.4747	-1.58894	67.5619	52.9037	14.6582	149.688	-6.09199	26.7754	37.6733	-10.8979	142.52	-6.37161	NA	NA	NA	NA	NA	#N/A
1094	MSTN	4.93434	23.1218	-2.22833	77.7723	55.5929	22.1794	391.267	-9.53669	73.5786	37.2627	36.3159	1254.88	-12.0726	71.7583	51.1002	20.6582	314.79	-7.933	1
1095	MSX1	3.89092	20.4595	-2.39459	12.9743	24.6466	-11.6724	206.142	-9.47144	NA	NA	NA	NA	NA	NA	NA	NA	NA	NA	#N/A
1096	MTUS1	164.38	468.134	-1.50989	78.2296	63.9889	14.2407	139.496	-5.90285	NA	NA	NA	NA	NA	NA	NA	NA	NA	NA	#N/A
1097	MUC1	112.35	2124.63	-4.24113	NA	NA	NA	NA	NA	82.4769	49.7833	32.6935	1024.23	-15.3649	59.5	49.1458	10.3542	70.3184	-11.6873	#N/A
1098	MUC15	149.155	4534.09	-4.92593	59.9709	40.3941	19.5769	314.151	-15.9918	NA	NA	NA	NA	NA	80.7138	52.7203	27.9935	645.617	-17.6425	1
1099	MUC16	714.145	5340.09	-2.90258	64.0524	51.8021	12.2503	102.486	-7.78421	47.806	33.8444	13.9616	176.821	-7.98981	NA	NA	NA	NA	NA	#N/A
1100	MUC20	18.5316	162.306	-3.13066	77.3865	54.3598	23.0267	429.887	-11.5827	74.4545	33.122	41.3324	1639.41	-15.5182	NA	NA	NA	NA	NA	#N/A
1101	MUC21	1.66715	7.84945	-2.23521	NA	NA	NA	NA	NA	48.7708	58.9375	-10.1667	128.005	-7.5454	86.8103	70.5013	16.3091	180.478	-6.9007	#N/A
1102	MUC5AC	138.284	6.72244	4.3625	NA	NA	NA	NA	NA	76.275	43.3333	32.9417	1043.62	-23.874	87.762	76.6566	11.1054	85.3525	-15.3374	#N/A
1103	MXD1	6807.02	2375.24	1.51895	NA	NA	NA	NA	NA	NA	NA	NA	NA	NA	52.375	27.625	24.75	474.124	-10.7415	#N/A
1104	MXRA8	11.9209	33.624	-1.496	69.3876	42.8952	26.4924	577.043	-10.9417	NA	NA	NA	NA	NA	NA	NA	NA	NA	NA	2
1105	MYBPC1	10.0009	273.714	-4.77447	NA	NA	NA	NA	NA	76.0625	49.625	26.4375	670.883	-15.7671	NA	NA	NA	NA	NA	#N/A
1106	MYBPH	151.834	37.3764	2.0223	88.1902	78.1861	10.0041	60.8957	-7.08431	NA	NA	NA	NA	NA	NA	NA	NA	NA	NA	#N/A
1107	MYO1G	1544.65	679.259	1.18525	NA	NA	NA	NA	NA	11.1508	50.401	-39.2502	1618.06	-13.5302	18.8502	35.7024	-16.8522	397.42	-7.78547	#N/A
1108	MYOZ3	10.0375	3.59225	1.48244	NA	NA	NA	NA	NA	89.1042	73.9917	15.1125	203.15	-7.1676	NA	NA	NA	NA	NA	#N/A
1109	MYZAP	20.6744	117.448	-2.5061	NA	NA	NA	NA	NA	NA	NA	NA	NA	NA	75.4377	64.3489	11.0888	70.3911	-6.65667	#N/A
1110	0IP	10155.3	1734.37	2.54976	NA	NA	NA	NA	NA	6.25	18.6667	-12.4167	186.015	-7.88329	NA	NA	NA	NA	NA	#N/A
1111	0V2	218.516	472.671	-1.1131	73.0151	84.4312	-11.4161	194.827	-6.95152	NA	NA	NA	NA	NA	NA	NA	NA	NA	NA	#N/A
1112	NCALD	30.945	128.818	-2.05755	67.5652	48.4444	19.1208	279.612	-8.06661	NA	NA	NA	NA	NA	NA	NA	NA	NA	NA	#N/A
1113	NCF1	2751.53	542.458	2.34265	NA	NA	NA	NA	NA	6.63156	28.5924	-21.9609	531.236	-8.96052	43.6935	59.3989	-15.7055	357.526	-8.9366	3
1114	NCF2	1730.32	729.269	1.24651	NA	NA	NA	NA	NA	4.91622	17.8265	-12.9103	194.128	-5.73674	34.1129	62.1291	-28.0162	966.355	-12.8905	1
1115	NCF4	412.4	168.614	1.29032	64.6261	54.5617	10.0644	59.1614	-5.70565	NA	NA	NA	NA	NA	NA	NA	NA	NA	NA	#N/A
1116	NCKAP5	5.25338	31.5977	-2.5885	NA	NA	NA	NA	NA	20.8295	9.58609	11.2435	111.859	-7.05575	NA	NA	NA	NA	NA	#N/A
1117	NEBL	99.5207	1824.65	-4.19648	NA	NA	NA	NA	NA	NA	NA	NA	NA	NA	21.3739	8.61887	12.755	110.844	-11.6428	#N/A
1118	NEDD9	885.83	2898.84	-1.71038	NA	NA	NA	NA	NA	11.6136	49.2575	-37.6439	1492.16	-15.8494	NA	NA	NA	NA	NA	7
1119	NEU3	636.846	277.41	1.19893	44.2923	33.3125	10.9798	73.5788	-5.7839	NA	NA	NA	NA	NA	NA	NA	NA	NA	NA	#N/A
1120	NEUROD4	5.75313	16.4129	-1.51241	NA	NA	NA	NA	NA	NA	NA	NA	NA	NA	23.0759	54.9439	-31.868	1220.38	-17.8567	#N/A
1121	NFE2	1001.52	305.239	1.71418	NA	NA	NA	NA	NA	NA	NA	NA	NA	NA	26.3277	56.6176	-30.2899	1114.26	-14.5174	1
1122	NFIB	334.692	4363.23	-3.70449	NA	NA	NA	NA	NA	NA	NA	NA	NA	NA	42.2075	19.8111	22.3964	387.404	-11.7044	7
1123	NFIX	101.412	1291.04	-3.67024	NA	NA	NA	NA	NA	NA	NA	NA	NA	NA	58.8414	31.0818	27.7596	623.559	-13.3592	#N/A
1124	NINJ2	12.7378	3.42208	1.89617	NA	NA	NA	NA	NA	14.9224	42.388	-27.4656	811.784	-9.66315	NA	NA	NA	NA	NA	11
1125	NKAPL	6.37325	17.3868	-1.44789	NA	NA	NA	NA	NA	57.1204	36.6562	20.4642	382.386	-6.61922	NA	NA	NA	NA	NA	#N/A
1126	NLGN3	147.56	51.3462	1.52297	NA	NA	NA	NA	NA	56.806	43.0744	13.7316	166.083	-6.96427	NA	NA	NA	NA	NA	#N/A
1127	NLRC4	478.009	139.501	1.77676	52.2688	68.406	-16.1372	351.371	-8.88474	13.2357	47.8833	-34.6476	1271.09	-11.9872	NA	NA	NA	NA	NA	#N/A
1128	NLRP12	167.532	69.2573	1.2744	53.834	69.7016	-15.8676	339.708	-8.22384	9.38348	31.2599	-21.8765	523.198	-7.46846	NA	NA	NA	NA	NA	#N/A
1129	NLRP2	19.4061	4.3704	2.15067	NA	NA	NA	NA	NA	71.1167	60.25	10.8667	103.562	-7.83258	82.375	61.8917	20.4833	309.558	-10.4508	#N/A
1130	NLRP3	1194.11	309.676	1.9471	NA	NA	NA	NA	NA	5.15625	17.7188	-12.5625	187.049	-6.66825	14.5789	54.2855	-39.7067	1831.55	-21.1138	#N/A
1131	NOD2	791.76	306.458	1.36937	NA	NA	NA	NA	NA	NA	NA	NA	NA	NA	36.6964	23.158	13.5384	112.521	-6.46224	2
1132	NOS2	5433.44	1122.22	2.27551	77.0969	66.423	10.6739	72.5496	-7.8583	70.8616	40.5134	30.3482	869.954	-13.9796	55.0427	78.2684	-23.2257	695.677	-11.5725	1
1133	NOSTRIN	14.5506	201.291	-3.79013	NA	NA	NA	NA	NA	78.0058	40.039	37.9668	1383.31	-15.7377	84.1252	71.6407	12.4845	102.531	-10.2107	1
1134	NOXA1	20.0086	42.6194	-1.09089	NA	NA	NA	NA	NA	NA	NA	NA	NA	NA	79.2175	59.636	19.5815	274.555	-6.48869	#N/A
1135	NR2F2	24.8276	86.1972	-1.7957	37.1753	64.2444	-27.0692	877.553	-17.2697	NA	NA	NA	NA	NA	NA	NA	NA	NA	NA	#N/A
1136	NR4A1	330.501	720.705	-1.12475	76.6711	87.4076	-10.7365	176.384	-6.71729	16.475	41.5833	-25.1083	680.142	-9.31345	NA	NA	NA	NA	NA	1
1137	NRARP	50.3582	381.689	-2.9221	28.0013	17.639	10.3623	69.3742	-7.55202	NA	NA	NA	NA	NA	NA	NA	NA	NA	NA	#N/A
1138	NRROS	1209.73	552.312	1.13113	14.7292	36.9657	-22.2366	613.958	-11.3403	NA	NA	NA	NA	NA	NA	NA	NA	NA	NA	4
1139	NTRK3	3.55351	9.6634	-1.44329	86.0194	72.9173	13.1021	113.901	-5.56022	NA	NA	NA	NA	NA	NA	NA	NA	NA	NA	1
1140	NUAK2	60.1584	206.192	-1.77715	NA	NA	NA	NA	NA	NA	NA	NA	NA	NA	39.9449	22.7958	17.1492	201.772	-6.4246	#N/A
1141	NUPR1	275.488	748.041	-1.44113	NA	NA	NA	NA	NA	67.4611	24.95	42.5111	1728.76	-14.1529	67.8472	36.2451	31.6021	817.54	-11.5078	1
1142	NXPE2	4.66419	50.0269	-3.42301	76.5349	63.3603	13.1747	124.488	-9.28722	82.2292	70.1417	12.0875	134.714	-9.2496	NA	NA	NA	NA	NA	#N/A
1143	NXPE4	20.9623	225.387	-3.42654	NA	NA	NA	NA	NA	55.5	26.25	29.25	811.485	-12.0326	8.21563	22.8708	-14.6552	323.877	-13.7298	#N/A
1144	OAS1Y	539.246	242.784	1.15127	85.4441	71.2554	14.1887	138.116	-6.63529	NA	NA	NA	NA	NA	18.2139	30.6722	-12.4583	241.839	-6.41852	#N/A
1145	OCSTAMP	746.264	131.518	2.50443	NA	NA	NA	NA	NA	15.825	52.0208	-36.1958	1387.05	-13.5936	60.8993	72.606	-11.7067	224.436	-8.25726	#N/A
1146	OGN	14.7596	70.46	-2.25515	NA	NA	NA	NA	NA	NA	NA	NA	NA	NA	92.4583	75	17.4583	212.384	-7.17351	#N/A
1147	OLFM4	125.346	24.4354	2.35887	NA	NA	NA	NA	NA	35.5144	53.3611	-17.8467	359.702	-8.19235	NA	NA	NA	NA	NA	#N/A
1148	OLFML3	31.1221	64.4851	-1.05103	NA	NA	NA	NA	NA	NA	NA	NA	NA	NA	83.1403	57.7776	25.3626	499.172	-8.49346	#N/A
1149	OR51E1	2.17966	5.92267	-1.44215	NA	NA	NA	NA	NA	28.0833	10.3899	17.6935	281.926	-6.08753	41.625	25.75	15.875	166.454	-5.79364	#N/A
1150	ORAI2	370.718	170.855	1.11755	30.4699	49.1606	-18.6907	451.01	-9.40802	NA	NA	NA	NA	NA	NA	NA	NA	NA	NA	#N/A
1151	OVOL1	28.8558	137.163	-2.24896	85.0062	72.0898	12.9164	112.735	-6.58661	NA	NA	NA	NA	NA	54.9828	37.1037	17.8791	224.67	-7.25742	2
1152	P2RY13	900.601	206.133	2.12732	34.1982	78.2534	-44.0551	2173.35	-30.5624	NA	NA	NA	NA	NA	NA	NA	NA	NA	NA	1
1153	PABPC4L	3.4489	8.22809	-1.25442	NA	NA	NA	NA	NA	51.3777	36.4751	14.9025	195.82	-5.49206	NA	NA	NA	NA	NA	#N/A
1154	PABPN1L	2.38133	7.35813	-1.62757	NA	NA	NA	NA	NA	NA	NA	NA	NA	NA	55.7209	32.2121	23.5088	421.221	-8.1161	#N/A
1155	PADI1	2.04939	12.7638	-2.6388	NA	NA	NA	NA	NA	58.3711	25.5371	32.834	1022.62	-11.4276	NA	NA	NA	NA	NA	2
1156	PAEP	11621.5	544900	-5.55113	84.2951	66.9157	17.3794	250.331	-18.1469	74.1417	43.725	30.4167	897.323	-19.9536	77.4978	51.8161	25.6817	541.957	-19.5881	1
1157	PAG11	10.5854	2.40775	2.13631	68.0133	50.3076	17.7056	236.173	-10.0051	NA	NA	NA	NA	NA	89.075	76.5313	12.5437	95.5278	-7.84222	#N/A
1158	PAH	98.4613	4899.41	-5.63691	NA	NA	NA	NA	NA	NA	NA	NA	NA	NA	72.2975	58.7254	13.5722	141.147	-17.9657	#N/A
1159	PAK4	133.753	302.069	-1.17531	NA	NA	NA	NA	NA	NA	NA	NA	NA	NA	71.7931	48.2079	23.5852	423.214	-7.84902	20
1160	PAPLN	54.7821	111.132	-1.02049	NA	NA	NA	NA	NA	1.375	12.375	-11	143.634	-5.57459	NA	NA	NA	NA	NA	#N/A
1161	PAPSS2	2694.67	1246.74	1.11195	45.3802	33.269	12.1111	93.7987	-5.95158	NA	NA	NA	NA	NA	NA	NA	NA	NA	NA	3
1162	PARD6A	3.14289	7.25623	-1.20713	NA	NA	NA	NA	NA	NA	NA	NA	NA	NA	57.188	41.8735	15.3146	151.824	-5.48858	#N/A
1163	PARD6B	63.9764	149.673	-1.2262	NA	NA	NA	NA	NA	NA	NA	NA	NA	NA	54.2153	39.1496	15.0657	145.818	-5.45111	1
1164	PARP12	1042.97	515.463	1.01675	NA	NA	NA	NA	NA	NA	NA	NA	NA	NA	50.38	39.2967	11.0832	66.0511	-5.38325	#N/A
1165	PAX2	16.435	33.3995	-1.02306	54.7957	65.873	-11.0773	185.34	-6.7154	NA	NA	NA	NA	NA	NA	NA	NA	NA	NA	#N/A
1166	PBX1	37.5248	308.481	-3.03926	38.2349	24.5636	13.6713	132.963	-8.37698	NA	NA	NA	NA	NA	NA	NA	NA	NA	NA	#N/A
1167	PCBD1	48.66	195.04	-2.00296	NA	NA	NA	NA	NA	NA	NA	NA	NA	NA	23.8627	12.6542	11.2085	70.2052	-5.74984	#N/A
1168	PCOLCE	517.631	139.555	1.89109	NA	NA	NA	NA	NA	91.4333	73.825	17.6083	281.558	-8.64208	NA	NA	NA	NA	NA	#N/A
1169	PDCD4	524.663	1666.73	-1.66756	55.5894	44.876	10.7135	69.6281	-5.3279	NA	NA	NA	NA	NA	NA	NA	NA	NA	NA	#N/A
1170	PDE1B	114.672	43.6758	1.39261	42.3915	30.8653	11.5263	83.6946	-6.23358	NA	NA	NA	NA	NA	NA	NA	NA	NA	NA	#N/A
1171	PDE2A	26.5322	55.3469	-1.06076	64.6951	50.6836	14.0115	133.15	-5.49919	NA	NA	NA	NA	NA	NA	NA	NA	NA	NA	#N/A
1172	PEAK3	86.1441	40.0482	1.10502	61.5188	77.5424	-16.0236	345.012	-8.15934	14.2981	54.3343	-40.0362	1681.67	-13.8722	21.9269	75.6574	-53.7304	3224.32	-33.7384	#N/A
1173	PERM1	4.50977	10.6308	-1.23713	NA	NA	NA	NA	NA	NA	NA	NA	NA	NA	68.9484	51.4483	17.5001	210.325	-6.0071	#N/A
1174	PF4	93.2356	25.6778	1.86036	38.3511	49.9746	-11.6235	203.751	-7.38281	NA	NA	NA	NA	NA	NA	NA	NA	NA	NA	#N/A
1175	PGA5	84.2017	32.3244	1.38123	NA	NA	NA	NA	NA	NA	NA	NA	NA	NA	33.2417	67.4653	-34.2236	1390.82	-16.7943	#N/A
1176	PGF	1.94856	8.52565	-2.1294	41.8946	30.2916	11.603	86.6339	-6.13684	NA	NA	NA	NA	NA	79.7684	53.8089	25.9596	529.303	-9.56665	2
1177	PGK1	5609.19	2187.72	1.35837	79.9492	69.1448	10.8044	71.0925	-5.99056	NA	NA	NA	NA	NA	NA	NA	NA	NA	NA	#N/A
1178	PGLYRP4	19.1448	7.14106	1.42275	NA	NA	NA	NA	NA	37.4948	25.2702	12.2246	129.516	-6.49384	NA	NA	NA	NA	NA	#N/A
1179	PHOX2A	2.60623	6.68198	-1.35831	NA	NA	NA	NA	NA	NA	NA	NA	NA	NA	39.5701	52.9545	-13.3844	271.209	-7.72728	#N/A
1180	PHYHIP	2.79122	6.59264	-1.23996	73.1373	58.5785	14.5588	146.401	-5.75997	NA	NA	NA	NA	NA	NA	NA	NA	NA	NA	#N/A
1181	PHYHIPL	10.1919	429.683	-5.39778	67.9811	51.8195	16.1616	213.961	-17.1699	26.4326	13.975	12.4576	159.933	-17.044	NA	NA	NA	NA	NA	#N/A
1182	PI15	12.719	163.061	-3.68036	69.1231	45.3154	23.8076	466.126	-13.3107	NA	NA	NA	NA	NA	NA	NA	NA	NA	NA	#N/A
1183	PIGR	241.43	5825.89	-4.5928	86.7605	75.4141	11.3464	97.8595	-12.9862	75.9375	30.7708	45.1667	1974.63	-21.026	73.4008	53.8652	19.5356	291.951	-14.0462	4
1184	PIK3C2G	6.87606	109.294	-3.99049	39.75	20.125	19.625	307.734	-12.6249	NA	NA	NA	NA	NA	NA	NA	NA	NA	NA	#N/A
1185	PILRA	1445.81	567.202	1.34995	57.1163	71.1968	-14.0805	277.442	-7.57828	31.8958	60.0625	-28.1667	850.187	-9.305	73.4417	86.2543	-12.8126	253.498	-6.69369	#N/A
1186	PKP3	61.6012	157.698	-1.35614	NA	NA	NA	NA	NA	87.3115	67.0118	20.2997	375.764	-6.51452	73.4527	43.6841	29.7686	715.945	-10.5552	2
1187	PLA2G2C	2.36615	8.1451	-1.78339	54.9641	68.8041	-13.8399	269.944	-9.04641	NA	NA	NA	NA	NA	NA	NA	NA	NA	NA	#N/A
1188	PLA2G3	2.1032	9.52277	-2.1788	NA	NA	NA	NA	NA	29.5181	11.4299	18.0882	297.748	-7.06239	74.6324	41.3294	33.3029	920.054	-12.9845	4
1189	PLA2G4A	119.306	45.4633	1.39189	17.1128	34.1394	-17.0266	383.994	-8.83491	NA	NA	NA	NA	NA	NA	NA	NA	NA	NA	2
1190	PLAC8	453.965	192.13	1.24049	76.798	63.9054	12.8925	109.757	-6.36968	0.875	15.75	-14.875	252.446	-6.02102	NA	NA	NA	NA	NA	#N/A
1191	PLAC8_1	64.0523	15.7276	2.02595	83.3573	93.6225	-10.2652	167.896	-7.26752	NA	NA	NA	NA	NA	72.2721	83.1234	-10.8512	197.637	-7.15113	#N/A
1192	PLAU	2327.37	1001.73	1.2162	53.955	71.3326	-17.3775	397.318	-8.84578	NA	NA	NA	NA	NA	NA	NA	NA	NA	NA	#N/A
1193	PLCE1	52.8767	158.449	-1.58332	20.0076	8.72119	11.2864	79.1089	-5.32906	NA	NA	NA	NA	NA	NA	NA	NA	NA	NA	2
1194	PLCL1	31.1203	140.078	-2.17031	52.8123	40.5165	12.2959	99.8794	-6.33128	NA	NA	NA	NA	NA	NA	NA	NA	NA	NA	1
1195	PLD1	486.301	242.719	1.00256	42.0976	70.2152	-28.1176	939.287	-15.1829	NA	NA	NA	NA	NA	NA	NA	NA	NA	NA	#N/A
1196	PLEK	6606.87	1617.27	2.0304	69.8134	80.049	-10.2355	167.159	-7.26738	9.525	47.9286	-38.4036	1553.67	-13.8052	NA	NA	NA	NA	NA	1
1197	PLEKHA5	108.927	305.603	-1.4883	31.1922	17.9296	13.2626	117.446	-5.64085	NA	NA	NA	NA	NA	NA	NA	NA	NA	NA	#N/A
1198	PLEKHB1	7.56609	55.2738	-2.86898	NA	NA	NA	NA	NA	NA	NA	NA	NA	NA	75.2191	50.9837	24.2354	456.725	-10.1839	2
1199	PLEKHO2	3510.24	1103.78	1.66912	NA	NA	NA	NA	NA	NA	NA	NA	NA	NA	52.9244	67.4706	-14.5462	312.519	-7.5363	2
1200	PLEKHS1	25.6403	63.6494	-1.31173	75.325	59.8	15.525	170.781	-6.0875	57.7	23.2083	34.4917	1126.21	-10.6708	81.7579	64.0287	17.7292	217.171	-6.11606	#N/A
1201	PLX01	1410.63	511.103	1.46465	NA	NA	NA	NA	NA	15.2847	59.4639	-44.1792	2039.5	-16.0431	NA	NA	NA	NA	NA	#N/A
1202	PLXNB3	6.813	20.6102	-1.597	NA	NA	NA	NA	NA	NA	NA	NA	NA	NA	65.5627	52.0909	13.4717	110.96	-5.50314	#N/A
1203	PNPLA2	210.305	478.883	-1.18719	NA	NA	NA	NA	NA	66.1667	29.25	36.9167	1294.48	-11.6055	NA	NA	NA	NA	NA	2
1204	PNPLA3	18.804	400.579	-4.41297	42.8608	32.494	10.3668	79.9371	-12.1946	NA	NA	NA	NA	NA	42.4132	30.5616	11.8517	95.908	-12.4053	#N/A
1205	POLR2L	90.7971	195.592	-1.10713	21.9643	35.0797	-13.1154	245.026	-7.61694	NA	NA	NA	NA	NA	NA	NA	NA	NA	NA	#N/A
1206	POR	1644.74	801.619	1.03687	NA	NA	NA	NA	NA	36.9333	75.7	-38.7667	1579.04	-13.2679	NA	NA	NA	NA	NA	13
1207	PPBP	44.1041	15.7534	1.48525	NA	NA	NA	NA	NA	25.4643	68.9643	-43.5	1978.72	-15.7085	NA	NA	NA	NA	NA	#N/A
1208	PPP1R18	2512.92	823.244	1.60997	NA	NA	NA	NA	NA	9.08435	30.4934	-21.409	503.141	-7.7006	33.7643	46.1882	-12.4239	242.17	-6.88963	4
1209	PPP1R9A	211.69	99.1797	1.09383	89.2125	77.273	11.9395	90.4862	-5.87895	71.6458	61.6	10.0458	84.2213	-5.61032	NA	NA	NA	NA	NA	#N/A
1210	PPP2R2B	1.9301	10.3417	-2.42172	NA	NA	NA	NA	NA	NA	NA	NA	NA	NA	77.5	93.625	-16.125	372.459	-11.1355	#N/A
1211	PRELP	2.51309	23.7472	-3.24022	NA	NA	NA	NA	NA	68.325	28.0722	40.2528	1554.05	-15.2951	68.4387	52.2171	16.2216	183.382	-9.04751	#N/A
1212	PRKAA2	55.6049	907.671	-4.02889	41.2165	27.2762	13.9403	145.741	-11.2956	NA	NA	NA	NA	NA	NA	NA	NA	NA	NA	#N/A
1213	PRKAR1B	11.9386	65.1494	-2.44812	56.644	44.1075	12.5365	105.848	-6.87105	NA	NA	NA	NA	NA	NA	NA	NA	NA	NA	1
1214	PRKG2	19.4442	423.398	-4.4446	71.1311	42.8408	28.2902	683.152	-17.8407	32.4393	18.5714	13.8679	185.269	-12.8746	NA	NA	NA	NA	NA	#N/A
1215	PROK1	2.84353	27.8061	-3.28965	72.1361	57.4175	14.7187	158.954	-9.23576	88.525	65.5917	22.9333	493.019	-10.2317	NA	NA	NA	NA	NA	#N/A
1216	PROM1	177.765	560.718	-1.65731	NA	NA	NA	NA	NA	NA	NA	NA	NA	NA	86.5009	73.4176	13.0833	103.185	-5.51223	3
1217	PRR15L	16.7144	46.2008	-1.46683	NA	NA	NA	NA	NA	NA	NA	NA	NA	NA	81.5272	60.9738	20.5533	308.508	-7.01401	5
1218	PRSS23	26.8269	140.06	-2.3843	NA	NA	NA	NA	NA	63.75	24.7292	39.0208	1454.18	-13.3394	NA	NA	NA	NA	NA	#N/A
1219	PRSS27	1.4099	8.17475	-2.53559	NA	NA	NA	NA	NA	72.9389	28.6223	44.3166	1886.12	-15.8754	77.6411	60.0562	17.5849	217.314	-7.70139	#N/A
1220	PRSS8	187.142	453.036	-1.27549	81.602	67.6527	13.9493	132.161	-5.6244	75.9814	31.4682	44.5132	1898.78	-15.1084	74.075	31.8475	42.2275	1537.02	-18.0572	9
1221	PTGDS	11.3307	47.2519	-2.06014	67.6481	37.7167	29.9314	755.668	-13.4949	67.6242	47.1237	20.5006	385.774	-7.30936	31.5994	16.3295	15.2699	153.276	-6.42425	1
1222	PTGIR	75.651	35.4006	1.09558	NA	NA	NA	NA	NA	55.7633	36.5061	19.2572	336.591	-7.43311	NA	NA	NA	NA	NA	#N/A
1223	PTPN20	2.02324	6.73297	-1.73458	66.9606	45.7841	21.1764	351.006	-8.49939	NA	NA	NA	NA	NA	NA	NA	NA	NA	NA	#N/A
1224	PTPN22	198.269	626.83	-1.66062	22.6843	62.5279	-39.8436	1795.99	-29.0009	7.975	33.75	-25.775	716.67	-10.5517	NA	NA	NA	NA	NA	1
1225	PTPN3	37.394	83.3435	-1.15626	NA	NA	NA	NA	NA	50.6875	85.3958	-34.7083	1272.74	-13.2217	NA	NA	NA	NA	NA	1
1226	PTPRB	44.4312	20.3634	1.12559	NA	NA	NA	NA	NA	61.6875	37	24.6875	564.952	-9.04683	60.8996	50.7443	10.1553	52.2471	-5.36724	#N/A
1227	PTX3	309.457	133.402	1.21396	NA	NA	NA	NA	NA	2.8125	13.082	-10.2695	127.793	-5.3855	NA	NA	NA	NA	NA	#N/A
1228	PYROXD2	10.9238	26.9239	-1.30141	58.7075	43.0834	15.6241	173.347	-6.10924	29.2029	13.8733	15.3297	208.026	-5.59072	NA	NA	NA	NA	NA	2
1229	QPRT	12.6789	35.9334	-1.50289	40.759	59.264	-18.5051	443.405	-10.8831	54.625	29.25	25.375	598.28	-7.82292	NA	NA	NA	NA	NA	2
1230	RAB13	14.4526	92.1849	-2.6732	NA	NA	NA	NA	NA	81.6157	71.1266	10.489	97.3215	-7.19737	77.4542	61.6762	15.778	168.69	-7.62631	#N/A
1231	RAB17	4.05326	13.0741	-1.68955	NA	NA	NA	NA	NA	92.8625	82.575	10.2875	89.5157	-5.43064	NA	NA	NA	NA	NA	#N/A
1232	RAB25	40.5987	186.334	-2.19839	NA	NA	NA	NA	NA	71.8344	31.8498	39.9846	1527.69	-13.5232	73.9948	63.3849	10.6099	61.5498	-6.02047	3
1233	RAB3IP	387.427	1293.19	-1.73893	41.8205	29.3656	12.4549	101.459	-5.74034	NA	NA	NA	NA	NA	NA	NA	NA	NA	NA	#N/A
1234	RAD51AP2	8.44338	47.1537	-2.48148	NA	NA	NA	NA	NA	NA	NA	NA	NA	NA	78.0208	88.5208	-10.5	188.78	-9.15867	#N/A
1235	RAPGEFL1	23.2189	67.7714	-1.54538	NA	NA	NA	NA	NA	5.60441	18.7894	-13.185	201.836	-6.73885	68.4413	40.9143	27.5269	601.63	-9.6342	1
1236	RASAL1	44.1577	638.74	-3.85449	NA	NA	NA	NA	NA	NA	NA	NA	NA	NA	68.2724	47.2374	21.0351	337.644	-11.8034	#N/A
1237	RASSF10	7.98126	42.9413	-2.42768	NA	NA	NA	NA	NA	28.7773	16.3078	12.4695	137.835	-6.81611	NA	NA	NA	NA	NA	#N/A
1238	RASSF4	700.079	2498.75	-1.83562	NA	NA	NA	NA	NA	NA	NA	NA	NA	NA	66.3942	44.4927	21.9014	358.661	-7.78419	7
1239	RBBP8NL	8.76684	41.4622	-2.24167	75.0643	44.772	30.2923	776.317	-13.9361	71.6389	37.3646	34.2743	1114.71	-11.3352	83.347	68.053	15.294	154.596	-6.7208	#N/A
1240	RBPJ	5441.5	2717.03	1.00197	NA	NA	NA	NA	NA	66.7333	78.1375	-11.4042	154.016	-5.3122	NA	NA	NA	NA	NA	3
1241	RDH12	2.28049	9.08247	-1.99374	NA	NA	NA	NA	NA	NA	NA	NA	NA	NA	88.5257	74.0219	14.5038	134.873	-6.18968	#N/A
1242	REC8	80.6488	26.3943	1.61143	NA	NA	NA	NA	NA	78.0989	61.8663	16.2325	236.559	-7.67715	NA	NA	NA	NA	NA	#N/A
1243	REEP6	16.8969	278.333	-4.04198	NA	NA	NA	NA	NA	NA	NA	NA	NA	NA	42.9992	30.0471	12.9521	113.483	-11.1039	1
1244	RELT	277.873	130.562	1.08969	NA	NA	NA	NA	NA	NA	NA	NA	NA	NA	45.1384	55.7891	-10.6508	188.926	-5.92246	#N/A
1245	RETN	114.916	26.5507	2.11376	39.7174	51.1883	-11.471	200.544	-7.75414	11.625	33.9583	-22.3333	547.357	-8.63508	NA	NA	NA	NA	NA	#N/A
1246	RFTN2	12.4257	187.197	-3.91316	NA	NA	NA	NA	NA	87.375	71	16.375	252.028	-11.1281	NA	NA	NA	NA	NA	1
1247	RGMB	72.0531	229.696	-1.67259	30.5878	43.0249	-12.4371	225.694	-8.22593	NA	NA	NA	NA	NA	NA	NA	NA	NA	NA	#N/A
1248	RGS12	81.4902	353.032	-2.1151	25.0745	14.5224	10.5521	68.5656	-5.94241	NA	NA	NA	NA	NA	NA	NA	NA	NA	NA	#N/A
1249	RHBDL2	9.04752	40.0127	-2.14486	80.6819	58.0424	22.6395	409.243	-9.62505	74.4375	24.1667	50.2708	2436.26	-18.5241	NA	NA	NA	NA	NA	2
1250	RHBG	1.43605	8.65516	-2.59146	37.8229	27.1786	10.6444	72.1594	-6.84507	NA	NA	NA	NA	NA	NA	NA	NA	NA	NA	#N/A
1251	RHEX	71.618	28.6717	1.3207	67.6248	84.8207	-17.1959	390.424	-8.84738	12.3944	41.6382	-29.2438	913.989	-9.63504	NA	NA	NA	NA	NA	#N/A
1252	RHOC	165.384	786.785	-2.25015	NA	NA	NA	NA	NA	NA	NA	NA	NA	NA	30.2604	13.4045	16.8559	195.354	-7.03649	4
1253	RHOH	449.545	214.138	1.06993	NA	NA	NA	NA	NA	90	61.2917	28.7083	771.847	-10.3306	NA	NA	NA	NA	NA	4
1254	RHPN2	58.0873	470.818	-3.01887	NA	NA	NA	NA	NA	NA	NA	NA	NA	NA	51.0952	38.3689	12.7263	102.123	-7.9955	3
1255	RILPL2	530.348	188.914	1.48921	NA	NA	NA	NA	NA	NA	NA	NA	NA	NA	57.1161	71.3557	-14.2396	301.209	-7.23469	2
1256	RIMKLB	59.1384	133.79	-1.17781	63.7353	48.9431	14.7922	151.948	-5.78248	NA	NA	NA	NA	NA	NA	NA	NA	NA	NA	#N/A
1257	RINL	54.132	119.488	-1.14231	63.7356	74.3229	-10.5873	172.488	-6.68653	10.5316	43.4333	-32.9017	1147.12	-12.3844	NA	NA	NA	NA	NA	3
1258	RIPK4	50.1651	113.121	-1.17311	NA	NA	NA	NA	NA	NA	NA	NA	NA	NA	68.776	46.5169	22.259	370.474	-7.37716	5
1259	R0SE1_1	59.6075	694.838	-3.54311	NA	NA	NA	NA	NA	NA	NA	NA	NA	NA	82.0504	53.7723	28.2781	648.581	-13.22	#N/A
1260	R0SE6	2575.22	954.067	1.43253	80.0111	90.179	-10.1679	163.192	-6.3894	3.875	14	-10.125	125.213	-5.62949	27.2278	65.9494	-38.7216	1746.43	-20.0519	#N/A
1261	RNF208	28.965	63.7202	-1.13744	NA	NA	NA	NA	NA	NA	NA	NA	NA	NA	4.41401	16.8125	-12.3985	239.309	-7.05825	#N/A
1262	RNF43	25.3127	74.1269	-1.55014	NA	NA	NA	NA	NA	27.8125	13.2	14.6125	188.555	-5.71999	61.7235	32.7121	29.0114	676.547	-10.3022	17
1263	RORC	23.2046	83.9045	-1.85434	35.699	25.0716	10.6274	68.8252	-5.55786	32.75	18.25	14.5	186.441	-6.07296	66.5929	53.2792	13.3137	108.503	-5.80007	#N/A
1264	RP1	3.79209	9.28911	-1.29255	81.4405	68.1807	13.2598	116.899	-5.46645	NA	NA	NA	NA	NA	NA	NA	NA	NA	NA	1
1265	RPL23A	3401.9	7787.56	-1.19483	40.2594	22.9265	17.3329	220.855	-6.58722	NA	NA	NA	NA	NA	NA	NA	NA	NA	NA	#N/A
1266	RRAD	20.5718	534.495	-4.69943	NA	NA	NA	NA	NA	25.4486	13.7523	11.6963	136.149	-13.8352	NA	NA	NA	NA	NA	#N/A
1267	RTL9	21.8236	10.2438	1.09114	NA	NA	NA	NA	NA	82.2755	70.4157	11.8597	120.493	-5.88264	NA	NA	NA	NA	NA	#N/A
1268	RTP3	6.05449	14.667	-1.27649	78.3557	61.1367	17.219	217.671	-6.60018	66.0975	32.5179	33.5797	1065.79	-10.3155	85.4674	71.1117	14.3556	129.354	-5.35091	#N/A
1269	S100A7	5.09645	10.8987	-1.09659	54.4026	69.5464	-15.1438	312.504	-8.50075	41.5938	66.9375	-25.3438	692.414	-9.34959	NA	NA	NA	NA	NA	#N/A
1270	S100A8	513.438	145.4	1.82016	NA	NA	NA	NA	NA	NA	NA	NA	NA	NA	5.39444	19.9402	-14.5457	313.072	-7.73871	#N/A
1271	S100A9	685.968	288.148	1.25133	NA	NA	NA	NA	NA	NA	NA	NA	NA	NA	16.4937	27.5491	-11.0554	200.591	-6.15947	#N/A
1272	S100B	151.114	4492.6	-4.89384	NA	NA	NA	NA	NA	NA	NA	NA	NA	NA	36.2872	25.342	10.9452	85.0923	-14.3677	1
1273	S1PR4	113.531	56.6398	1.00319	NA	NA	NA	NA	NA	41.0195	61.5426	-20.5231	462.539	-6.94507	NA	NA	NA	NA	NA	#N/A
1274	SBNO2	2245.91	978.11	1.19923	67.3495	43.1777	24.1718	471.112	-11.2421	NA	NA	NA	NA	NA	NA	NA	NA	NA	NA	4
1275	SCGB1D	12.1205	1772.51	-7.1922	NA	NA	NA	NA	NA	NA	NA	NA	NA	NA	76.7261	43.6924	33.0337	949.391	-30.7694	2
1276	SCGB2A2	2.42416	68.7664	-4.82615	NA	NA	NA	NA	NA	73.125	29.8125	43.3125	1816.24	-21.0574	84.4	64.9393	19.4607	291.617	-14.9598	2
1277	SCIMP	600.044	212.712	1.49617	NA	NA	NA	NA	NA	20.025	57.3208	-37.2958	1465.66	-12.8248	NA	NA	NA	NA	NA	#N/A
1278	SCML4	72.815	400.082	-2.45799	NA	NA	NA	NA	NA	5.0625	26.25	-21.1875	495.537	-10.9484	NA	NA	NA	NA	NA	2
1279	SCN1B	13.4747	85.0277	-2.65768	NA	NA	NA	NA	NA	NA	NA	NA	NA	NA	42.3824	29.508	12.8744	103.065	-7.16479	#N/A
1280	SCNN1A	33.0201	138.065	-2.06393	81.2604	66.1254	15.135	163.096	-6.81548	74.8781	39.675	35.2031	1176.75	-11.4668	77.067	44.2449	32.8221	890.726	-12.6077	2
1281	SCX	21.6394	128.875	-2.57424	89.6631	75.2852	14.3778	146.764	-7.50638	43.4009	31.9107	11.4902	116.927	-7.04188	66.3571	87.0938	-20.7366	571.198	-13.7904	#N/A
1282	SDCBP	7443.5	3697.93	1.00927	NA	NA	NA	NA	NA	37.75	61.375	-23.625	605.408	-7.73521	NA	NA	NA	NA	NA	#N/A
1283	SDS	10521.6	3866.17	1.44438	NA	NA	NA	NA	NA	67.75	50.5417	17.2083	266.772	-7.56449	NA	NA	NA	NA	NA	1
1284	SDSL	37.6341	12.1596	1.62994	NA	NA	NA	NA	NA	NA	NA	NA	NA	NA	78	45	33	900.799	-15.5163	1
1285	SELENBP1	17.1492	315.794	-4.20278	44.5818	33.0521	11.5297	97.8186	-11.5345	NA	NA	NA	NA	NA	61.3402	47.624	13.7161	130.495	-11.7463	#N/A
1286	SELENOF	681.998	2033.52	-1.57614	NA	NA	NA	NA	NA	NA	NA	NA	NA	NA	55.0007	42.1814	12.8194	97.7136	-5.37875	1
1287	SELL	2890.28	930.665	1.63487	59.9962	49.6124	10.3839	65.2015	-6.37553	17.25	68.9375	-51.6875	2774.18	-20.3059	30.4375	68.7634	-38.3259	1714.21	-19.8474	#N/A
1288	SELP	7.76925	3.10936	1.32116	58.9804	71.8075	-12.8271	237.342	-7.09739	NA	NA	NA	NA	NA	NA	NA	NA	NA	NA	#N/A
1289	SEMA3F	52.2186	119.487	-1.19421	72.2969	52.4467	19.8503	301.829	-7.53296	NA	NA	NA	NA	NA	82.965	63.634	19.331	266.536	-6.46941	#N/A
1290	SEMA4A	3919.98	1032.11	1.92525	NA	NA	NA	NA	NA	85.75	51.125	34.625	1138.11	-14.8156	NA	NA	NA	NA	NA	#N/A
1291	SERPI01	20.1892	96.1459	-2.25164	76.7256	62.2659	14.4597	147.253	-6.93814	61.7652	27.3125	34.4527	1126.67	-11.4116	77.9782	67.6355	10.3426	57.7956	-6.09431	4
1292	SERPINB4	936.373	446.783	1.06751	NA	NA	NA	NA	NA	NA	NA	NA	NA	NA	49.625	70.6667	-21.0417	581.341	-9.34289	#N/A
1293	SERPINB5	33.7148	302.477	-3.16537	NA	NA	NA	NA	NA	NA	NA	NA	NA	NA	65.4314	53.4622	11.9692	88.8916	-8.3034	1
1294	SERPINE1	2523.55	603.861	2.06316	NA	NA	NA	NA	NA	47.6815	32.1354	15.5461	217.847	-8.5684	NA	NA	NA	NA	NA	1
1295	SERPING1	26.3925	85.4304	-1.69462	84.3566	69.3794	14.9772	157.859	-6.29242	NA	NA	NA	NA	NA	NA	NA	NA	NA	NA	1
1296	SFN	61.4553	295.01	-2.26315	61.8967	43.2334	18.6633	265.447	-8.20415	84.0726	59.9824	24.0902	539.815	-8.37004	NA	NA	NA	NA	NA	2
1297	SH2B2	96.0125	34.5191	1.47583	NA	NA	NA	NA	NA	63.3637	77.4601	-14.0964	229.114	-6.16448	NA	NA	NA	NA	NA	#N/A
1298	SH2D2A	63.9475	210.794	-1.72088	58.154	68.9303	-10.7763	178.959	-7.65829	NA	NA	NA	NA	NA	NA	NA	NA	NA	NA	#N/A
1299	SH2D3A	7.46397	20.6998	-1.4716	NA	NA	NA	NA	NA	NA	NA	NA	NA	NA	54.2641	39.706	14.5582	134.46	-5.55996	#N/A
1300	SH3BP2	4039.79	1427.41	1.50089	14.3257	44.2407	-29.915	1054.01	-16.7806	67.4556	77.5569	-10.1014	124.911	-5.7179	82.2651	68.0217	14.2435	128.238	-6.88209	#N/A
1301	SH3BP4	463.491	2779.51	-2.58422	NA	NA	NA	NA	NA	NA	NA	NA	NA	NA	67.6942	51.6156	16.0786	175.997	-7.49736	#N/A
1302	SH3GLB2	181.692	435.658	-1.2617	31.1208	18.292	12.8289	107.749	-5.34115	NA	NA	NA	NA	NA	55.5261	34.4027	21.1234	328.298	-7.04873	8
1303	SH3RF2	11.9956	114.899	-3.2598	59.8312	43.2332	16.5981	208.194	-9.62255	NA	NA	NA	NA	NA	37.8193	20.307	17.5123	219.2	-9.33173	2
1304	SH3YL1	84.4154	290.682	-1.78386	NA	NA	NA	NA	NA	NA	NA	NA	NA	NA	77.2351	67.046	10.1892	53.8222	-5.32301	#N/A
1305	SHANK2	130.449	477.519	-1.87207	NA	NA	NA	NA	NA	NA	NA	NA	NA	NA	72.7832	59.3372	13.446	111.299	-5.84466	#N/A
1306	SHF	21.1654	92.9186	-2.13426	NA	NA	NA	NA	NA	NA	NA	NA	NA	NA	67.4002	44.2316	23.1686	409.171	-8.56819	#N/A
1307	SHMT2	2462.52	888.75	1.47029	24.0495	13.1073	10.9422	73.7473	-6.21508	NA	NA	NA	NA	NA	NA	NA	NA	NA	NA	#N/A
1308	SIGIRR	38.9231	87.8156	-1.17385	56.8315	41.415	15.4165	167.666	-5.96026	32.8115	12.4667	20.3448	377.102	-6.40806	NA	NA	NA	NA	NA	#N/A
1309	SIGLEC10	91.3256	43.0625	1.08459	NA	NA	NA	NA	NA	81.75	66.5	15.25	205.924	-6.4965	NA	NA	NA	NA	NA	#N/A
1310	SIGLEC5	155.058	40.2961	1.9441	NA	NA	NA	NA	NA	NA	NA	NA	NA	NA	5	17.5	-12.5	245.811	-7.38632	#N/A
1311	SIRPB1	971.863	371.558	1.38717	72.0208	59.7393	12.2815	97.8695	-6.43313	NA	NA	NA	NA	NA	87.1599	74.8037	12.3562	89.1474	-6.21716	#N/A
1312	SLA2	191.362	682.477	-1.83447	NA	NA	NA	NA	NA	18.1775	61.3318	-43.1543	1948.29	-19.1765	77.5629	62.8931	14.6698	138.141	-5.99565	3
1313	SLC11A1	3259.3	960.699	1.76241	37.8636	61.8345	-23.9709	704.814	-12.904	7.5625	31.9833	-24.4208	647.469	-8.63366	42.8472	76.643	-33.7958	1360.42	-16.749	1
1314	SLC11A2	3726.18	1837.23	1.02017	63.1001	43.1733	19.9268	304.761	-8.71418	NA	NA	NA	NA	NA	NA	NA	NA	NA	NA	3
1315	SLC13A2	2.47446	11.943	-2.27098	84.8065	71.408	13.3985	123.095	-6.72615	72.0938	29.9955	42.0982	1697.45	-14.5315	82.5656	63.5733	18.9922	259.04	-7.55839	5
1316	SLC13A5	2032.05	626.043	1.6986	NA	NA	NA	NA	NA	NA	NA	NA	NA	NA	7.71708	20.9175	-13.2004	267.104	-7.20372	#N/A
1317	SLC14A1	4.51496	9.85695	-1.12643	77.5585	61.4649	16.0936	185.511	-6.13915	70.5739	26.2493	44.3246	1882.07	-15.0147	NA	NA	NA	NA	NA	#N/A
1318	SLC15A2	10.6365	128.372	-3.59323	74.3352	52.5783	21.7569	382.364	-12.2168	72.0833	32.5	39.5833	1504.19	-15.8369	70.7186	35.8776	34.841	1023.28	-16.3335	1
1319	SLC16A3	1134.62	300.667	1.91597	NA	NA	NA	NA	NA	16.0375	48.85	-32.8125	1144.35	-11.4549	NA	NA	NA	NA	NA	2
1320	SLC22A18	123.74	40.6403	1.60633	NA	NA	NA	NA	NA	55.0312	30	25.0312	582.842	-10.1575	55.889	71.9946	-16.1056	369.572	-7.93551	#N/A
1321	SLC22A31	2.9733	24.4169	-3.03775	NA	NA	NA	NA	NA	46.1849	17.716	28.4689	765.491	-10.9017	67.2978	42.1006	25.1972	499.374	-10.8697	1
1322	SLC22A5	48.8196	154.64	-1.66338	NA	NA	NA	NA	NA	NA	NA	NA	NA	NA	69.5106	52.3379	17.1727	202.078	-6.30038	4
1323	SLC23A2	2787.67	1288.11	1.1138	NA	NA	NA	NA	NA	58.125	33.5	24.625	561.959	-9.00527	NA	NA	NA	NA	NA	#N/A
1324	SLC25A10	688.178	328.608	1.06641	NA	NA	NA	NA	NA	NA	NA	NA	NA	NA	27.6355	16.0097	11.6258	75.1919	-5.55682	#N/A
1325	SLC25A23	22.2509	72.0774	-1.69568	43.064	21.4956	21.5685	365.674	-8.63057	26.0239	10.73	15.2939	208.065	-5.97523	NA	NA	NA	NA	NA	#N/A
1326	SLC25A35	27.8872	94.5281	-1.76114	NA	NA	NA	NA	NA	45.5657	25.1395	20.4262	381.816	-6.91487	79.7167	64.1469	15.5698	159.644	-6.07076	2
1327	SLC26A7	2.51159	8.25555	-1.71676	71.2618	84.084	-12.8222	237.49	-8.47012	54.875	84.625	-29.75	945.13	-12.2205	NA	NA	NA	NA	NA	#N/A
1328	SLC28A1	17.0578	45.3967	-1.41215	85.4311	70.3032	15.128	160.847	-6.05351	79.4298	54.6048	24.8251	571.483	-7.61358	79.0179	46.5382	32.4797	868.368	-11.955	1
1329	SLC28A3	145.193	1287.36	-3.14838	52.3863	63.6322	-11.2459	198.182	-11.4375	35.4361	61.4658	-26.0296	737.064	-14.9385	88.1842	76.7963	11.3879	78.7459	-8.20968	1
1330	SLC29A1	373.444	1107	-1.56769	36.1936	22.366	13.8276	130.135	-5.85682	NA	NA	NA	NA	NA	NA	NA	NA	NA	NA	#N/A
1331	SLC34A2	104.541	4801.28	-5.52128	74.8104	51.1771	23.6332	475.12	-19.9412	NA	NA	NA	NA	NA	76.9886	60.5571	16.4314	208.298	-17.6206	1
1332	SLC35G6	3.79979	9.4699	-1.31743	32.8125	10.0793	22.7332	410.403	-8.87456	NA	NA	NA	NA	NA	81.1417	63.6042	17.5375	211.589	-6.07249	#N/A
1333	SLC38A3	16.1187	193.454	-3.58519	NA	NA	NA	NA	NA	NA	NA	NA	NA	NA	50.9626	37.966	12.9966	111.013	-9.60571	3
1334	SLC39A14	84.0497	257.999	-1.61805	NA	NA	NA	NA	NA	NA	NA	NA	NA	NA	80.6355	68.6657	11.9698	81.9395	-5.30809	5
1335	SLC44A4	26.2742	11.5282	1.18848	70.8189	44.8483	25.9706	552.257	-12.3044	63	28.5	34.5	1127.19	-12.9179	72.7493	59.857	12.8923	98.856	-6.00887	1
1336	SLC46A1	117.239	58.324	1.00729	NA	NA	NA	NA	NA	NA	NA	NA	NA	NA	56.8141	39.9923	16.8218	191.284	-6.76348	#N/A
1337	SLC4A8	176.23	76.8484	1.19737	NA	NA	NA	NA	NA	NA	NA	NA	NA	NA	66.4762	30.3968	36.0794	1093.46	-16.4894	#N/A
1338	SLC50A1	51.684	206.973	-2.00165	38.7731	27.412	11.361	81.8007	-5.89383	NA	NA	NA	NA	NA	NA	NA	NA	NA	NA	#N/A
1339	SLC5A1	19.012	148.495	-2.96543	82.9857	66.805	16.1808	194.864	-8.79456	80.9535	40.8279	40.1257	1542.45	-14.7016	74.5634	52.4824	22.081	370.571	-9.71964	2
1340	SLC5A9	10.1504	109.415	-3.43019	77.1829	64.6072	12.5757	112.117	-9.20369	39.2535	23	16.2535	244.89	-9.61257	NA	NA	NA	NA	NA	3
1341	SLC6A1	1.9301	6.86068	-1.82967	50.6854	32.1673	18.5181	259.134	-7.56092	NA	NA	NA	NA	NA	NA	NA	NA	NA	NA	#N/A
1342	SLC6A16	3.38611	9.21252	-1.44397	88.6529	68.1472	20.5057	325.576	-7.96231	79.2264	49.6042	29.6223	823.619	-9.02548	NA	NA	NA	NA	NA	#N/A
1343	SLC7A11	940.478	429.407	1.13105	38.4236	27.3695	11.0541	74.6646	-5.70288	NA	NA	NA	NA	NA	NA	NA	NA	NA	NA	#N/A
1344	SLC7A4	43.0658	643.745	-3.90188	56.917	33.7802	23.1369	439.615	-13.6612	17.8194	6.26032	11.5591	126.594	-10.7625	NA	NA	NA	NA	NA	1
1345	SLC8A1	116.648	285.718	-1.29243	84.1321	64.6121	19.5199	290.696	-7.45701	74.6042	36.2854	38.3188	1397.52	-12.217	NA	NA	NA	NA	NA	4
1346	SLCO1A2	5.37267	62.559	-3.54151	NA	NA	NA	NA	NA	49.429	20.6917	28.7373	783.5	-12.1994	NA	NA	NA	NA	NA	#N/A
1347	SMIM4	35.3221	82.3033	-1.22038	NA	NA	NA	NA	NA	NA	NA	NA	NA	NA	16.7562	27.8701	-11.1139	201.469	-6.77191	#N/A
1348	SMIM5	3.0333	14.231	-2.23007	NA	NA	NA	NA	NA	81.0417	69.4375	11.6042	117.791	-6.37146	NA	NA	NA	NA	NA	#N/A
1349	SMLR1	2.5711	6.09303	-1.24477	75.4838	56.6445	18.8393	267.895	-7.16315	NA	NA	NA	NA	NA	NA	NA	NA	NA	NA	#N/A
1350	SNTG2	13.0328	3.6156	1.84984	83.7352	65.6933	18.0419	245.28	-9.45816	71	87.9444	-16.9444	324.3	-7.13285	NA	NA	NA	NA	NA	#N/A
1351	SNX33	38.9345	120.238	-1.62677	NA	NA	NA	NA	NA	90.0448	66.0056	24.0392	535.17	-7.5832	84.9679	67.2282	17.7397	218.315	-6.39568	2
1352	SOWAHB	58.1219	382.052	-2.71662	27.4849	16.4116	11.0733	79.9505	-7.17481	NA	NA	NA	NA	NA	NA	NA	NA	NA	NA	#N/A
1353	SOX10	111.175	1383.02	-3.63692	73.5728	33.9949	39.5779	1386.3	-23.2819	NA	NA	NA	NA	NA	21.2791	9.13819	12.1409	95.0623	-9.69159	2
1354	SOX13	44.1809	230.809	-2.38521	NA	NA	NA	NA	NA	NA	NA	NA	NA	NA	68.9794	54.8145	14.1649	128.82	-6.79027	#N/A
1355	SOX8	6.72734	24.9271	-1.88961	NA	NA	NA	NA	NA	NA	NA	NA	NA	NA	75.0453	46.7284	28.3169	642.026	-10.2669	#N/A
1356	SP5	3.32241	9.29968	-1.48495	27.0844	45.8763	-18.7919	455.493	-11.0128	16.0212	32.7835	-16.7623	315.618	-7.44906	NA	NA	NA	NA	NA	#N/A
1357	SP6	11.3337	26.9879	-1.2517	15.4939	27.1894	-11.6955	202.97	-7.24462	NA	NA	NA	NA	NA	NA	NA	NA	NA	NA	#N/A
1358	SPADH1	4.55237	33.2095	-2.8669	NA	NA	NA	NA	NA	75.5143	37.8073	37.707	1358.27	-13.5623	NA	NA	NA	NA	NA	#N/A
1359	SPATA13	405.706	1248.27	-1.62142	45.5427	34.2144	11.3283	79.957	-5.38011	NA	NA	NA	NA	NA	74.5657	58.4634	16.1023	172.84	-6.01893	#N/A
1360	SPATA3	2.17018	12.7893	-2.55905	68.3119	52.1785	16.1334	191.446	-7.92587	NA	NA	NA	NA	NA	NA	NA	NA	NA	NA	#N/A
1361	SPDYC	4.15346	10.9667	-1.40075	NA	NA	NA	NA	NA	NA	NA	NA	NA	NA	93.3705	75.4911	17.8795	221.825	-6.22214	#N/A
1362	SPI1	3538.13	1620.06	1.12694	59.9939	83.3435	-23.3496	670.27	-12.0069	15.0506	63.9113	-48.8607	2483.01	-18.5038	45.9501	67.8189	-21.8687	622.005	-9.73632	4
1363	SPIC	140.173	43.1415	1.70006	NA	NA	NA	NA	NA	10.125	27.625	-17.5	343.919	-7.01188	NA	NA	NA	NA	NA	#N/A
1364	SPINK4	1	6.06526	-2.60057	NA	NA	NA	NA	NA	94.375	84.125	10.25	92.458	-7.02208	NA	NA	NA	NA	NA	#N/A
1365	SPINT2	259.846	1144.6	-2.13911	NA	NA	NA	NA	NA	NA	NA	NA	NA	NA	61.8209	43.0639	18.757	251.047	-7.29403	8
1366	SPP1	241040	117316	1.03888	73.1112	46.9487	26.1625	560.919	-12.1526	70.625	26.75	43.875	1843.72	-17.262	NA	NA	NA	NA	NA	#N/A
1367	SPTLC3	50.5421	897.388	-4.15017	NA	NA	NA	NA	NA	17.5351	7.00882	10.5263	107.678	-11.6237	NA	NA	NA	NA	NA	#N/A
1368	SRGN	30178.5	13750.1	1.13408	36.748	55.467	-18.719	452.254	-9.43273	6	50.875	-44.875	2101.83	-16.2976	38.4969	58.1862	-19.6893	518.204	-8.81552	3
1369	SSC5D	18.2803	37.3568	-1.03108	82.7109	67.2131	15.4978	169.5	-5.90503	57.209	34.5287	22.6803	472.863	-6.87732	51.0886	25.9928	25.0958	487.293	-8.38075	#N/A
1370	ST5	35.6145	224.998	-2.65937	36.8871	25.9182	10.969	77.8829	-7.03523	NA	NA	NA	NA	NA	NA	NA	NA	NA	NA	#N/A
1371	STAB1	689.63	292.773	1.23604	NA	NA	NA	NA	NA	16.3777	30.5211	-14.1434	229.809	-5.90285	NA	NA	NA	NA	NA	1
1372	STAP1	131.738	56.6956	1.21636	NA	NA	NA	NA	NA	20.6964	52.7812	-32.0848	1093.35	-10.5698	NA	NA	NA	NA	NA	#N/A
1373	STAP2	23.698	247.456	-3.38433	88.8289	75.8902	12.9387	119.259	-9.13709	63.8222	30.1875	33.6347	1078.58	-13.2159	79.4195	62.0704	17.3491	215.293	-9.63547	1
1374	STAT4	182.345	684.837	-1.90909	81.1347	66.7906	14.3442	143.181	-6.3928	NA	NA	NA	NA	NA	NA	NA	NA	NA	NA	#N/A
1375	STX11	908.616	196.102	2.21207	68.9165	82.3799	-13.4635	260.678	-8.55637	20.125	77.5	-57.375	3407.7	-24.2836	52.1667	84.5833	-32.4167	1262.64	-16.3447	1
1376	STX19	5.89237	60.5516	-3.36125	83.5416	67.2624	16.2792	199.953	-9.80318	73.7083	34.2708	39.4375	1491.4	-15.233	NA	NA	NA	NA	NA	1
1377	SUCNR1	104.242	40.8209	1.35256	34.6952	70.9539	-36.2587	1505.15	-22.1006	NA	NA	NA	NA	NA	NA	NA	NA	NA	NA	#N/A
1378	SURF2	39.3793	116.958	-1.57048	27.4573	11.7993	15.658	174.93	-6.35266	NA	NA	NA	NA	NA	NA	NA	NA	NA	NA	#N/A
1379	SUSD1	1506.05	706.726	1.09155	67.2327	81.904	-14.6714	296.686	-7.58868	NA	NA	NA	NA	NA	NA	NA	NA	NA	NA	#N/A
1380	SUSD6	3942.37	1372.39	1.52238	NA	NA	NA	NA	NA	NA	NA	NA	NA	NA	62.3402	50.3114	12.0288	83.5841	-6.3888	#N/A
1381	SV2A	40.0849	88.0975	-1.13604	73.6791	60.0039	13.6752	125.67	-5.45691	NA	NA	NA	NA	NA	NA	NA	NA	NA	NA	#N/A
1382	SVOPL	4.68656	9.67177	-1.04525	78.4014	46.7042	31.6972	852.783	-14.0988	NA	NA	NA	NA	NA	NA	NA	NA	NA	NA	#N/A
1383	SYK	2505.57	1012.32	1.30748	27.7469	16.7443	11.0026	74.2692	-5.9576	NA	NA	NA	NA	NA	NA	NA	NA	NA	NA	4
1384	SYNE4	2.80968	15.9131	-2.50174	NA	NA	NA	NA	NA	75.375	31.0083	44.3667	1890.3	-15.8553	87.5982	65.2798	22.3185	377.267	-8.87105	#N/A
1385	SYNJ2	141.749	380.005	-1.42268	36.6366	23.5495	13.0871	113.529	-5.53752	NA	NA	NA	NA	NA	NA	NA	NA	NA	NA	#N/A
1386	SYTL3	48.2784	193.717	-2.0045	75.3592	59.8546	15.5046	172.341	-6.8302	NA	NA	NA	NA	NA	NA	NA	NA	NA	NA	#N/A
1387	TANK	1137.05	417.773	1.44451	61.0042	39.9561	21.0481	346.254	-10.0161	NA	NA	NA	NA	NA	NA	NA	NA	NA	NA	1
1388	TARM1	184.188	51.0266	1.85186	NA	NA	NA	NA	NA	25.9969	38.7479	-12.751	191.791	-6.52903	NA	NA	NA	NA	NA	#N/A
1389	TBC1D23	1946.96	920.744	1.08035	24.7979	35.5262	-10.7284	176.725	-6.20449	NA	NA	NA	NA	NA	NA	NA	NA	NA	NA	#N/A
1390	TBC1D24	188.819	684.205	-1.85743	NA	NA	NA	NA	NA	NA	NA	NA	NA	NA	58.1211	47.0453	11.0759	67.5354	-5.51584	7
1391	TBC1D30	51.9835	165.746	-1.67284	NA	NA	NA	NA	NA	59.6458	80.1042	-20.4583	460.768	-8.81659	NA	NA	NA	NA	NA	#N/A
1392	TBXAS1	130.942	59.399	1.14041	NA	NA	NA	NA	NA	7.875	32.1458	-24.2708	637.891	-7.99191	NA	NA	NA	NA	NA	2
1393	TC2N	140.755	553.623	-1.97572	48.291	32.4029	15.8881	182.352	-6.89843	NA	NA	NA	NA	NA	NA	NA	NA	NA	NA	1
1394	TCF7	170.114	768.948	-2.17639	38.3551	27.0196	11.3354	82.0261	-6.16862	NA	NA	NA	NA	NA	NA	NA	NA	NA	NA	#N/A
1395	TCIM	55.3332	261.431	-2.24021	70.558	46.7733	23.7847	457.052	-10.2896	63.2509	31.2146	32.0363	970.561	-10.5658	NA	NA	NA	NA	NA	4
1396	TCN1	671.269	85.7123	2.96932	NA	NA	NA	NA	NA	54.3125	71.4375	-17.125	336.519	-9.50217	NA	NA	NA	NA	NA	#N/A
1397	TECTB	9.10711	119.74	-3.71676	NA	NA	NA	NA	NA	NA	NA	NA	NA	NA	86.4397	75.2861	11.1536	78.6296	-9.87976	2
1398	TENT5C	389.481	2423.69	-2.63758	NA	NA	NA	NA	NA	NA	NA	NA	NA	NA	51.3787	38.4286	12.9502	104.461	-7.13057	#N/A
1399	TFF3	32.1634	1382.31	-5.42552	85.1925	68.6023	16.5902	226.141	-17.3869	75.475	49.125	26.35	672.88	-18.5367	61.7001	43.4646	18.2355	258.854	-17.3927	#N/A
1400	TFR2	14.6172	7.0668	1.04853	NA	NA	NA	NA	NA	19.5476	39.9498	-20.4022	457.466	-6.94586	NA	NA	NA	NA	NA	#N/A
1401	TGFBR3	253.924	1771.93	-2.80285	39.5165	28.3228	11.1937	82.4777	-7.38541	NA	NA	NA	NA	NA	NA	NA	NA	NA	NA	#N/A
1402	THBS2	22.6355	7.12015	1.66861	50.4806	36.9165	13.5641	125.527	-7.34817	NA	NA	NA	NA	NA	21.6277	10.7131	10.9145	65.3003	-6.43444	1
1403	THEG	1.39322	6.80917	-2.28906	NA	NA	NA	NA	NA	83.7425	73.3267	10.4158	94.1372	-6.39502	82.3517	65.7386	16.6131	188.867	-7.05222	#N/A
1404	TIE1	2.22819	7.76448	-1.80102	NA	NA	NA	NA	NA	17.4333	39.6083	-22.175	537.634	-9.62089	44.5069	67.1576	-22.6508	662.718	-12.7441	#N/A
1405	TI0GL1	3257.62	1080.9	1.59159	29.622	12.1682	17.4538	226.389	-8.64428	NA	NA	NA	NA	NA	NA	NA	NA	NA	NA	#N/A
1406	TJP2	334.643	865.317	-1.37061	30.506	18.2274	12.2786	96.9475	-5.31054	NA	NA	NA	NA	NA	NA	NA	NA	NA	NA	2
1407	TLR8	1098.82	439.552	1.32185	NA	NA	NA	NA	NA	24.5316	70.1579	-45.6263	2171.78	-16.7419	NA	NA	NA	NA	NA	#N/A
1408	TM4SF5	6.44571	30.1179	-2.22421	47.5064	65.3999	-17.8935	420.55	-12.1008	37.8917	57.2967	-19.405	418.76	-9.76287	NA	NA	NA	NA	NA	#N/A
1409	TMC4	85.4695	193.118	-1.176	60.6648	33.0585	27.6063	630.955	-11.4418	NA	NA	NA	NA	NA	NA	NA	NA	NA	NA	2
1410	TMC5	11.8982	218.522	-4.19896	63.7552	48.7594	14.9958	172.338	-12.0843	NA	NA	NA	NA	NA	61.9556	51.6918	10.2638	68.6607	-11.5264	#N/A
1411	TMCO2	10.8363	4.78302	1.17988	NA	NA	NA	NA	NA	93.1667	82.5	10.6667	96.118	-5.82982	NA	NA	NA	NA	NA	#N/A
1412	TMEM102	7.3394	41.5879	-2.50243	NA	NA	NA	NA	NA	63.2053	34.2127	28.9926	791.776	-10.0185	61.95	46.334	15.616	163.755	-7.25243	2
1413	TMEM120B	175.362	2333.23	-3.73392	NA	NA	NA	NA	NA	NA	NA	NA	NA	NA	74.8225	56.7115	18.111	240.07	-10.7958	3
1414	TMEM121B	7.58846	16.655	-1.13408	42.3752	27.9271	14.4481	143.524	-5.65953	NA	NA	NA	NA	NA	NA	NA	NA	NA	NA	#N/A
1415	TMEM125	25.1487	223.182	-3.14966	79.7153	53.5817	26.1335	567.147	-13.0996	NA	NA	NA	NA	NA	NA	NA	NA	NA	NA	3
1416	TMEM150B	154.954	54.3049	1.51269	27.2329	60.3644	-33.1315	1272.97	-19.3938	15.8148	53.4772	-37.6624	1493.89	-12.994	12.3038	59.8735	-47.5697	2563.98	-27.5655	2
1417	TMEM171	10.2848	103.772	-3.33483	78.7151	52.615	26.1001	566.715	-13.5075	NA	NA	NA	NA	NA	NA	NA	NA	NA	NA	1
1418	TMEM184A	4.64501	24.521	-2.40027	NA	NA	NA	NA	NA	NA	NA	NA	NA	NA	77.4994	55.3665	22.1328	369.676	-8.64099	#N/A
1419	TMEM210	3.47505	14.7137	-2.08205	73.2635	28.4331	44.8304	1794.88	-25.7916	74.0616	32.8937	41.1679	1620.99	-13.9218	72.7202	30.9956	41.7246	1500.34	-18.0289	#N/A
1420	TMEM233	7.18932	79.9902	-3.4759	61.477	72.6303	-11.1532	197.714	-12.4947	NA	NA	NA	NA	NA	NA	NA	NA	NA	NA	#N/A
1421	TMEM35B	16.0063	89.7874	-2.48787	NA	NA	NA	NA	NA	NA	NA	NA	NA	NA	26.9575	12.8466	14.111	128.094	-6.97916	#N/A
1422	TMEM72	5.68087	14.7435	-1.3759	NA	NA	NA	NA	NA	74.9189	36.7708	38.1481	1385	-12.1667	NA	NA	NA	NA	NA	#N/A
1423	TMEM95	5.44684	12.8829	-1.24196	69.9808	40.8432	29.1375	710.299	-12.4133	68.625	46.875	21.75	433.721	-6.75542	NA	NA	NA	NA	NA	1
1424	TMOD4	16.7791	242.779	-3.8549	NA	NA	NA	NA	NA	50.363	36.7729	13.5901	173.45	-10.7073	76.1568	60.6355	15.5213	169.598	-10.7534	#N/A
1425	TMPRSS2	66.5079	246.423	-1.88954	NA	NA	NA	NA	NA	NA	NA	NA	NA	NA	40.3837	29.9852	10.3985	57.2183	-5.495	#N/A
1426	TNFAIP6	109.737	29.9271	1.87453	59.0047	79.6617	-20.657	540.733	-11.1472	47.6875	57.75	-10.0625	125.424	-6.29201	NA	NA	NA	NA	NA	#N/A
1427	TNFAIP8L2	522.034	194.241	1.42629	NA	NA	NA	NA	NA	8.79167	41.2083	-32.4167	1116	-10.8284	19.6366	56.058	-36.4214	1559.58	-18.3467	4
1428	TNFRSF11A	229.188	95.212	1.26732	74.1521	62.7051	11.447	81.9007	-6.00797	52.1999	72.5833	-20.3834	457.236	-7.11052	NA	NA	NA	NA	NA	#N/A
1429	TNFRSF1A	3193.11	1217.55	1.39098	37.7923	55.7226	-17.9303	420.115	-9.2504	NA	NA	NA	NA	NA	NA	NA	NA	NA	NA	6
1430	TNFRSF9	24.7851	241.367	-3.28369	81.6185	69.7996	11.8189	96.5112	-8.6779	NA	NA	NA	NA	NA	84.7946	71.9278	12.8669	106.46	-8.71201	#N/A
1431	TNFSF15	663.517	206.247	1.68576	NA	NA	NA	NA	NA	75.6287	26.4886	49.1401	2325.37	-22.0667	NA	NA	NA	NA	NA	3
1432	TNFSF18	169.234	75.9678	1.15556	NA	NA	NA	NA	NA	28.0208	16.1889	11.8319	120.051	-5.97598	NA	NA	NA	NA	NA	#N/A
1433	TNFSF4	22.0427	10.754	1.03542	NA	NA	NA	NA	NA	42	60.875	-18.875	394.542	-6.59653	NA	NA	NA	NA	NA	2
1434	TNNT2	4.33097	19.0623	-2.13796	NA	NA	NA	NA	NA	NA	NA	NA	NA	NA	79.7307	60.6279	19.1028	262.032	-7.37913	#N/A
1435	TNS1	1215.58	413.146	1.55692	55.2213	40.1745	15.0468	160.116	-7.63559	88.7411	65.9063	22.8348	481.723	-9.33633	NA	NA	NA	NA	NA	3
1436	TNS2	143.333	631.308	-2.13897	NA	NA	NA	NA	NA	78.7708	28.4053	50.3655	2445.58	-18.5721	NA	NA	NA	NA	NA	#N/A
1437	TNS4	78.0236	36.3163	1.10329	NA	NA	NA	NA	NA	79.1562	42.4643	36.692	1278.85	-13.7347	80.5238	68.1132	12.4106	89.3763	-5.77286	#N/A
1438	TP53INP1	825.387	2239.23	-1.43986	33.7268	20.387	13.3399	118.986	-5.61277	NA	NA	NA	NA	NA	NA	NA	NA	NA	NA	#N/A
1439	TPCN2	728.854	257.258	1.50241	68.3669	38.4175	29.9494	755.725	-15.6568	NA	NA	NA	NA	NA	NA	NA	NA	NA	NA	#N/A
1440	TPM1	394.557	1943.12	-2.30007	48.1159	37.5711	10.5448	69.2109	-6.26147	NA	NA	NA	NA	NA	NA	NA	NA	NA	NA	#N/A
1441	TPST1	25.5729	58.7806	-1.20073	NA	NA	NA	NA	NA	86.625	68.4226	18.2024	298.657	-5.99791	NA	NA	NA	NA	NA	2
1442	TREM1	1529.4	523.827	1.54581	NA	NA	NA	NA	NA	9.25	25.875	-16.625	311.846	-6.65421	58.3554	72.113	-13.7576	284.974	-7.16274	#N/A
1443	TREML2	1538.95	467.133	1.72004	59.1091	73.2003	-14.0913	279.045	-8.0078	33.375	63.25	-29.875	953.842	-10.2077	15.2267	40.5875	-25.3608	810.015	-11.8413	#N/A
1444	TRGC4	31.3996	189.349	-2.59223	65.5202	54.0877	11.4325	85.6083	-6.96436	NA	NA	NA	NA	NA	NA	NA	NA	NA	NA	#N/A
1445	TRGC6	25.3438	307.311	-3.59999	NA	NA	NA	NA	NA	90.8351	80.0417	10.7935	108.762	-9.73294	NA	NA	NA	NA	NA	#N/A
1446	TRIM56	1070.52	511.421	1.06573	NA	NA	NA	NA	NA	NA	NA	NA	NA	NA	24.1893	12.3566	11.8327	78.7859	-5.59753	4
1447	TRNP1	10.4981	28.0195	-1.41631	NA	NA	NA	NA	NA	NA	NA	NA	NA	NA	47.1077	58.3176	-11.2099	204.657	-7.10286	#N/A
1448	TRPM2	212.1	458.772	-1.11303	37.5156	57.5482	-20.0326	509.031	-11.1132	NA	NA	NA	NA	NA	NA	NA	NA	NA	NA	#N/A
1449	TRPV1	146.974	67.2469	1.12802	78.048	59.4404	18.6075	260.808	-8.28912	76.9167	40.7083	36.2083	1244.57	-13.5621	NA	NA	NA	NA	NA	#N/A
1450	TSPAN32	1555.7	506.508	1.61891	20.9394	7.49621	13.4432	122.69	-7.21052	0	11.25	-11.25	152.027	-5.99953	21.5689	57.8949	-36.326	1552.71	-18.3781	1
1451	TSPAN7	14.9932	7.26235	1.0458	77.1458	65.2701	11.8756	89.1692	-5.79463	22.4528	34.425	-11.9722	168.48	-5.42116	NA	NA	NA	NA	NA	#N/A
1452	TSPYL4	151.726	723.937	-2.2544	NA	NA	NA	NA	NA	28.5065	17.0326	11.4739	115.135	-6.40537	NA	NA	NA	NA	NA	#N/A
1453	TTC36	1.66715	13.4206	-3.00899	80.1921	66.4766	13.7155	133.779	-8.31283	86.9667	59.8333	27.1333	693.61	-10.4934	82.4441	51.9747	30.4694	760.65	-12.9092	1
1454	TTC39A	59.1223	334.756	-2.50134	38.8974	26.8554	12.0421	96.4236	-6.88324	NA	NA	NA	NA	NA	NA	NA	NA	NA	NA	#N/A
1455	TTLL10	4.70651	16.213	-1.78442	NA	NA	NA	NA	NA	77.3681	51.7909	25.5772	609.041	-8.12543	80.0342	62.369	17.6652	216.624	-6.55281	#N/A
1456	TUBB2A	1447.58	648.033	1.1595	NA	NA	NA	NA	NA	17	5	12	123.746	-6.00996	23.8819	12.3304	11.5514	74.154	-5.67753	#N/A
1457	TYROBP	2041.36	900.158	1.18128	27.8879	62.327	-34.4391	1366.89	-20.3833	16.6786	51.7732	-35.0946	1301.19	-11.7255	30.9893	53.3021	-22.3128	644.463	-9.96598	1
1458	VCAM1	129.907	41.9333	1.63132	NA	NA	NA	NA	NA	NA	NA	NA	NA	NA	67.3437	43.5536	23.7902	433.754	-10.556	#N/A
1459	VILL	4.24131	10.4118	-1.29563	82.8228	65.8229	16.9999	211.316	-6.53966	57.2292	30.0625	27.1667	688.484	-8.19373	37.5257	15.2652	22.2606	370.801	-7.44202	2
1460	VIPR1	9.86762	166.18	-4.0739	NA	NA	NA	NA	NA	NA	NA	NA	NA	NA	72.3168	57.9336	14.3832	144.155	-11.3531	2
1461	VNN2	2625.98	685.709	1.93719	71.375	84.85	-13.475	259.824	-8.09976	NA	NA	NA	NA	NA	NA	NA	NA	NA	NA	#N/A
1462	VSIG4	1494.19	447.194	1.7404	44.7288	66.5137	-21.785	593.742	-11.597	23.75	61.125	-37.375	1472.59	-13.0579	NA	NA	NA	NA	NA	#N/A
1463	VSNL1	2.21921	11.1882	-2.33386	28.9627	12.59	16.3727	196.991	-7.58736	NA	NA	NA	NA	NA	NA	NA	NA	NA	NA	2
1464	WDFY4	6183.25	2571.91	1.26553	62.9029	79.9729	-17.07	385.318	-8.74375	10.275	45.2917	-35.0167	1295.8	-11.7344	NA	NA	NA	NA	NA	#N/A
1465	WNT5A	8.8443	21.8313	-1.30358	NA	NA	NA	NA	NA	15.5303	34.4765	-18.9462	397.31	-7.71091	NA	NA	NA	NA	NA	#N/A
1466	WSB1	4950.19	1594.6	1.63429	36.3614	26.2717	10.0897	60.6522	-6.30348	NA	NA	NA	NA	NA	NA	NA	NA	NA	NA	#N/A
1467	WWC1	158.051	415.398	-1.3941	NA	NA	NA	NA	NA	NA	NA	NA	NA	NA	79.8251	63.2299	16.5952	185.338	-5.9096	#N/A
1468	XCL1	2.75167	24.0407	-3.1271	85.8894	71.5245	14.3649	149.446	-8.73994	NA	NA	NA	NA	NA	85.158	71.1458	14.0122	129.325	-8.42371	#N/A
1469	XCL2	9.76856	199.998	-4.3557	NA	NA	NA	NA	NA	83.5134	68.8214	14.692	206.478	-12.5788	85.8917	69.8313	16.0604	187.316	-12.5759	#N/A
1470	XDH	5171.67	35778.7	-2.7904	74.5468	63.0081	11.5387	88.523	-7.40967	6.25	19.2222	-12.9722	200.897	-9.60302	54.8757	42.8588	12.0169	87.619	-7.36882	#N/A
1471	XK	35.3935	444.12	-3.64939	NA	NA	NA	NA	NA	57.3167	44.1042	13.2125	162.567	-10.0124	NA	NA	NA	NA	NA	#N/A
1472	ZAP70	360.778	1062.89	-1.55881	75.2791	56.9819	18.2972	251.271	-7.20067	73.067	40.1329	32.9341	1024.79	-10.214	NA	NA	NA	NA	NA	#N/A
1473	ZBED2	4.31621	10.0122	-1.21392	NA	NA	NA	NA	NA	77.4583	62.2288	15.2295	204.963	-5.51018	NA	NA	NA	NA	NA	#N/A
1474	ZC3H12C	3910.91	1254.67	1.6402	NA	NA	NA	NA	NA	63.25	81.375	-18.125	367.158	-7.04747	NA	NA	NA	NA	NA	#N/A
1475	ZC3H7B	142.213	443.131	-1.63968	NA	NA	NA	NA	NA	NA	NA	NA	NA	NA	60.8062	49.1142	11.692	77.1184	-5.29838	7
1476	ZDHHC18	3841.93	1568.03	1.29288	NA	NA	NA	NA	NA	NA	NA	NA	NA	NA	65.8868	55.3586	10.5281	58.1443	-5.68732	#N/A
1477	ZFPM1	8.1341	31.8041	-1.96716	34.494	50.1441	-15.6501	333.043	-10.2963	NA	NA	NA	NA	NA	NA	NA	NA	NA	NA	#N/A
1478	ZG16B	2.17018	42.1238	-4.27875	82.2704	61.4144	20.856	353.688	-13.9919	77.0417	54.875	22.1667	467.099	-13.1356	67.2542	56.1167	11.1375	82.7022	-11.8562	#N/A
1479	ZIM2	1.9301	7.31783	-1.92274	NA	NA	NA	NA	NA	75.6667	64.3542	11.3125	110.476	-5.83966	NA	NA	NA	NA	NA	#N/A
1480	ZKSCAN4	8.82342	19.3283	-1.1313	48.7015	31.4925	17.209	217.07	-6.50867	NA	NA	NA	NA	NA	NA	NA	NA	NA	NA	#N/A
1481	ZNF185	26.2078	133.601	-2.34987	NA	NA	NA	NA	NA	NA	NA	NA	NA	NA	70.7026	56.2542	14.4483	135.049	-6.76904	#N/A
1482	ZNF263	146.139	65.9035	1.14891	NA	NA	NA	NA	NA	NA	NA	NA	NA	NA	59.8434	47.666	12.1774	85.1755	-5.79088	#N/A
1483	ZNF532	65.0217	164.577	-1.33977	80.9285	67.8208	13.1077	113.761	-5.4691	NA	NA	NA	NA	NA	NA	NA	NA	NA	NA	#N/A
1484	ZNF594	2.36045	8.21312	-1.79887	NA	NA	NA	NA	NA	NA	NA	NA	NA	NA	81.25	70.875	10.375	56.5635	-5.36144	#N/A
1485	ZNF683	13.3894	80.9055	-2.59515	85.5591	72.2345	13.3245	122.972	-7.31636	NA	NA	NA	NA	NA	NA	NA	NA	NA	NA	#N/A
1486	ZNF750	50.0208	181.952	-1.86296	79.9844	43.8883	36.096	1131.06	-17.7389	73.5417	35.9583	37.5833	1344.74	-12.2051	66.778	41.9369	24.8411	478.296	-8.82799	1

## Sheet: TableS10E_dMHB_DMEGs
Table S10E List of differentially methylated (promoter, first exon and/or first Iintron) and expressed genes (DMEGs) which overlapped with differnetial methylation haplotype blocks
	gene_ID	meth.diff_pro	log2FC_promoter	num_dMHBs_promoter	name_dmhbs_promoter	num_dmhbs_dmc_promoter	num_CpGdmc_promoter	num_CpGdmcHyper_promoter	num_CpGdmcHypo_promoter	meth.diff_FE	log2FC_firstExon	num_dMHBs_firstExon	name_dmhbs_firstExon	num_dmhbs_dmc_firstExon	num_CpGdmc_firstExon	num_CpGdmcHyper_firstExon	num_CpGdmcHypo_firstExon	meth.diff_FI	log2FC	num_dMHBs_firstIntron	name_dmhbs_firstIntron	num_dmhbs_dmc_firstIntron	num_CpGdmc_firstIntron	num_CpGdmcHyper_firstIntron	num_CpGdmcHypo_firstIntron
1	ABCG2	NA	NA	NA	NA	NA	NA	NA	NA	NA	NA	NA	NA	NA	NA	NA	NA	-22.4167	-4.74114	1	chr6:36549564:36549583	2	37	30	7
2	ABO	NA	NA	NA	NA	NA	NA	NA	NA	NA	NA	NA	NA	NA	NA	NA	NA	14.615	-1.4176	4	chr11:104208986:104209080,chr11:104206893:104206953,chr11:104209984:104209999,chr11:104206996:104207099	4	97	95	2
3	ACOX2	NA	NA	NA	NA	NA	NA	NA	NA	NA	NA	NA	NA	NA	NA	NA	NA	31.6337	-3.45293	4	chr22:42838142:42838191,chr22:42837822:42837834,chr22:42836935:42837033,chr22:42837174:42837194	8	68	68	0
4	ACTA2	11.8486	1.86389	1	chr26:10644384:10644466	7	11	11	0	NA	NA	NA	NA	NA	NA	NA	NA	NA	NA	NA	NA	NA	NA	NA	NA
5	ADAMTS8	NA	NA	NA	NA	NA	NA	NA	NA	NA	NA	NA	NA	NA	NA	NA	NA	11.4903	-1.78661	1	chr29:36532824:36532911	0	27	27	0
6	AGR2	NA	NA	NA	NA	NA	NA	NA	NA	NA	NA	NA	NA	NA	NA	NA	NA	19.794	-4.52687	1	chr4:25303662:25303686	0	4	4	0
7	ALOX5AP	NA	NA	NA	NA	NA	NA	NA	NA	-32.1813	1.1068	1	chr12:30134473:30134527	0	5	0	5	NA	NA	NA	NA	NA	NA	NA	NA
8	ANGPTL4	18.1298	1.34033	3	chr7:17004156:17004196,chr7:17004410:17004470,chr7:17004456:17004514	0	10	10	0	NA	NA	NA	NA	NA	NA	NA	NA	NA	NA	NA	NA	NA	NA	NA	NA
9	AOAH	NA	NA	NA	NA	NA	NA	NA	NA	-36.8862	1.18168	1	chr4:60547673:60547699	2	7	0	7	NA	NA	NA	NA	NA	NA	NA	NA
10	AOX2	27.3903	1.01686	1	chr2:89365336:89365449	0	7	7	0	NA	NA	NA	NA	NA	NA	NA	NA	NA	NA	NA	NA	NA	NA	NA	NA
11	ARC	NA	NA	NA	NA	NA	NA	NA	NA	10.3058	-3.21146	2	chr14:1743012:1743022,chr14:1741786:1741797	11	48	48	0	NA	NA	NA	NA	NA	NA	NA	NA
12	ARL11	NA	NA	NA	NA	NA	NA	NA	NA	NA	NA	NA	NA	NA	NA	NA	NA	-39.7241	1.36325	1	chr12:19180281:19180340	6	11	0	11
13	ASAP3	NA	NA	NA	NA	NA	NA	NA	NA	NA	NA	NA	NA	NA	NA	NA	NA	10.1775	-3.479	2	chr2:129369188:129369235,chr2:129378179:129378219	0	104	87	17
14	B4GALNT3	NA	NA	NA	NA	NA	NA	NA	NA	NA	NA	NA	NA	NA	NA	NA	NA	16.6235	-2.69791	25	chr5:107378203:107378228,chr5:107405079:107405100,chr5:107392321:107392413,chr5:107377578:107377672,chr5:107378581:107378597,chr5:107400873:107400926,chr5:107357040:107357051,chr5:107355269:107355335,chr5:107339212:107339307,chr5:107398657:107398759,chr5:107384807:107384878,chr5:107401440:107401450,chr5:107378676:107378713,chr5:107343057:107343073,chr5:107405202:107405215,chr5:107402343:107402423…	37	371	363	8
15	B4GALT1	NA	NA	NA	NA	NA	NA	NA	NA	NA	NA	NA	NA	NA	NA	NA	NA	17.3173	-1.11484	15	chr8:74901782:74901807,chr8:74889766:74889776,chr8:74888355:74888442,chr8:74910841:74910921,chr8:74910456:74910541,chr8:74911812:74911838,chr8:74888982:74889061,chr8:74910225:74910313,chr8:74896505:74896576,chr8:74886913:74886964,chr8:74911981:74912006,chr8:74896911:74897010,chr8:74886000:74886034,chr8:74903062:74903111,chr8:74889206:74889251	44	270	256	14
16	BATF	NA	NA	NA	NA	NA	NA	NA	NA	NA	NA	NA	NA	NA	NA	NA	NA	-24.1894	1.09494	3	chr10:86716609:86716694,chr10:86715340:86715353,chr10:86715722:86715804	8	28	0	28
17	BCKDHA	NA	NA	NA	NA	NA	NA	NA	NA	NA	NA	NA	NA	NA	NA	NA	NA	15.2494	-1.41955	1	chr18:50545193:50545264	0	38	38	0
18	BCL2L15	NA	NA	NA	NA	NA	NA	NA	NA	-44.4844	-2.45518	1	chr3:29498375:29498422	8	14	0	14	-40.625	-2.45518	1	chr3:29498746:29498810	5	2	0	2
19	BSPRY	NA	NA	NA	NA	NA	NA	NA	NA	NA	NA	NA	NA	NA	NA	NA	NA	12.7143	-2.82531	2	chr8:102607050:102607102,chr8:102606180:102606229	5	16	16	0
20	C25H16orf54	NA	NA	NA	NA	NA	NA	NA	NA	NA	NA	NA	NA	NA	NA	NA	NA	-11.8508	1.60696	1	chr25:26478862:26478905	0	16	0	16
21	C5AR2	19.2227	1.04106	1	chr18:54336658:54336722	8	34	31	3	NA	NA	NA	NA	NA	NA	NA	NA	NA	NA	NA	NA	NA	NA	NA	NA
22	C6H4orf19	NA	NA	NA	NA	NA	NA	NA	NA	NA	NA	NA	NA	NA	NA	NA	NA	11.9012	-2.21279	9	chr6:56902405:56902468,chr6:56901270:56901290,chr6:56876646:56876739,chr6:56873080:56873161,chr6:56868865:56868955,chr6:56857373:56857469,chr6:56869932:56870014,chr6:56864687:56864737,chr6:56902870:56902942	16	161	149	12
23	CARD9	NA	NA	NA	NA	NA	NA	NA	NA	NA	NA	NA	NA	NA	NA	NA	NA	-11.1918	1.44492	1	chr11:103830522:103830574	0	8	0	8
24	CCDC88B	NA	NA	NA	NA	NA	NA	NA	NA	NA	NA	NA	NA	NA	NA	NA	NA	-48.747	1.61308	1	chr29:42630992:42631072	0	0	0	0
25	CCL26	NA	NA	NA	NA	NA	NA	NA	NA	37.008	-3.89841	1	chr25:34042822:34042840	3	1	1	0	43.7083	-3.89841	1	chr25:34042822:34042840	3	2	2	0
26	CCL28	NA	NA	NA	NA	NA	NA	NA	NA	NA	NA	NA	NA	NA	NA	NA	NA	10.4035	-3.29242	2	chr20:31372556:31372611,chr20:31373734:31373823	0	31	31	0
27	CCL3	-13.7142	1.95599	1	chr19:14360087:14360101	0	14	0	14	NA	NA	NA	NA	NA	NA	NA	NA	NA	NA	NA	NA	NA	NA	NA	NA
28	CCRL2	-20.1146	2.13016	1	chr22:53001921:53001978	0	8	4	4	NA	NA	NA	NA	NA	NA	NA	NA	NA	NA	NA	NA	NA	NA	NA	NA
29	CD177	NA	NA	NA	NA	NA	NA	NA	NA	-13.4159	1.17321	1	chr18:51546407:51546448	5	6	0	6	NA	NA	NA	NA	NA	NA	NA	NA
30	CD300A	NA	NA	NA	NA	NA	NA	NA	NA	-46.8755	1.63088	2	chr19:56953128:56953175,chr19:56953324:56953353	0	7	0	7	NA	NA	NA	NA	NA	NA	NA	NA
31	CD7	28.8011	-2.85094	2	chr19:50542072:50542119,chr19:50542448:50542468	1	32	32	0	NA	NA	NA	NA	NA	NA	NA	NA	NA	NA	NA	NA	NA	NA	NA	NA
32	CDH16	12.6106	-3.50673	2	chr18:34624768:34624824,chr18:34623234:34623266	5	12	12	0	NA	NA	NA	NA	NA	NA	NA	NA	NA	NA	NA	NA	NA	NA	NA	NA
33	CDKL1	NA	NA	NA	NA	NA	NA	NA	NA	NA	NA	NA	NA	NA	NA	NA	NA	14.4483	-1.97588	1	chr10:43283830:43283865	0	13	13	0
34	CEACAM19	36.6329	-2.71685	3	chr18:52446560:52446606,chr18:52445163:52445204,chr18:52446736:52446822	3	17	17	0	41.7663	-2.71685	1	chr18:52447176:52447221	0	7	7	0	NA	NA	NA	NA	NA	NA	NA	NA
35	CEBPE	-22.2683	1.42296	1	chr10:21743223:21743280	0	7	0	7	NA	NA	NA	NA	NA	NA	NA	NA	NA	NA	NA	NA	NA	NA	NA	NA
36	CELA2A	-20.1508	2.62341	1	chr16:52039257:52039356	4	11	1	10	NA	NA	NA	NA	NA	NA	NA	NA	NA	NA	NA	NA	NA	NA	NA	NA
37	CELSR2	NA	NA	NA	NA	NA	NA	NA	NA	NA	NA	NA	NA	NA	NA	NA	NA	12.7345	1.04196	1	chr3:34152654:34152692	3	17	17	0
38	CFAP73	16.3352	-2.42285	1	chr17:61167126:61167190	0	26	26	0	48.7228	-2.42285	1	chr17:61167491:61167585	0	0	0	0	NA	NA	NA	NA	NA	NA	NA	NA
39	CHRND	14.3615	-1.57577	1	chr2:120165387:120165443	3	10	10	0	NA	NA	NA	NA	NA	NA	NA	NA	NA	NA	NA	NA	NA	NA	NA	NA
40	CIDEA	17.1571	-3.16208	2	chr24:42777103:42777189,chr24:42777013:42777104	4	10	10	0	NA	NA	NA	NA	NA	NA	NA	NA	NA	NA	NA	NA	NA	NA	NA	NA
41	CLDN8	31.8148	-4.68353	1	chr1:5770215:5770240	0	7	7	0	37.5953	-4.68353	2	chr1:5770786:5770851,chr1:5770215:5770240	2	74	74	0	NA	NA	NA	NA	NA	NA	NA	NA
42	CLEC3B	NA	NA	NA	NA	NA	NA	NA	NA	NA	NA	NA	NA	NA	NA	NA	NA	11.8052	-1.68823	1	chr22:54164439:54164466	0	14	14	0
43	CPA3	NA	NA	NA	NA	NA	NA	NA	NA	-46.4625	1.72511	1	chr1:119329458:119329495	4	4	0	4	NA	NA	NA	NA	NA	NA	NA	NA
44	CPXM2	NA	NA	NA	NA	NA	NA	NA	NA	NA	NA	NA	NA	NA	NA	NA	NA	12.5246	-2.40842	3	chr26:43627112:43627127,chr26:43623532:43623567,chr26:43627257:43627343	1	32	32	0
45	CRYAB	NA	NA	NA	NA	NA	NA	NA	NA	NA	NA	NA	NA	NA	NA	NA	NA	41.2173	-1.54651	1	chr15:22244291:22244396	0	15	15	0
46	CSF1R	NA	NA	NA	NA	NA	NA	NA	NA	-41.9772	1.17816	1	chr7:61411439:61411454	3	5	0	5	NA	NA	NA	NA	NA	NA	NA	NA
47	CSF2RB	NA	NA	NA	NA	NA	NA	NA	NA	NA	NA	NA	NA	NA	NA	NA	NA	13.8614	-1.55978	3	chr5:75356487:75356511,chr5:75350827:75350877,chr5:75357083:75357131	2	46	43	3
48	CUEDC1	NA	NA	NA	NA	NA	NA	NA	NA	NA	NA	NA	NA	NA	NA	NA	NA	13.3495	-2.50488	19	chr19:8705234:8705301,chr19:8697762:8697815,chr19:8716650:8716667,chr19:8729166:8729191,chr19:8727129:8727207,chr19:8711249:8711271,chr19:8693993:8694065,chr19:8732859:8732959,chr19:8725078:8725089,chr19:8715682:8715701,chr19:8732958:8733054,chr19:8695381:8695386,chr19:8730990:8731027,chr19:8735889:8735936,chr19:8722739:8722822,chr19:8727659:8727740,chr19:8727408:8727498,chr19:8728961:8729040,chr…	37	382	339	43
49	CXCL17	NA	NA	NA	NA	NA	NA	NA	NA	30.5798	-2.22236	1	chr18:51506652:51506669	0	0	0	0	11.4484	-2.22236	1	chr18:51505950:51505976	1	14	14	0
50	CYB561	NA	NA	NA	NA	NA	NA	NA	NA	NA	NA	NA	NA	NA	NA	NA	NA	17.9597	-1.89065	1	chr19:47771096:47771169	7	9	9	0
51	DDO	27.9109	-3.56716	1	chr9:39796114:39796157	0	21	21	0	NA	NA	NA	NA	NA	NA	NA	NA	NA	NA	NA	NA	NA	NA	NA	NA
52	DHRS11	NA	NA	NA	NA	NA	NA	NA	NA	NA	NA	NA	NA	NA	NA	NA	NA	18.2947	-2.09706	1	chr19:12933032:12933125	2	29	29	0
53	DIO2	NA	NA	NA	NA	NA	NA	NA	NA	NA	NA	NA	NA	NA	NA	NA	NA	16.893	-4.70893	1	chr10:91503672:91503743	0	26	26	0
54	DOK3	NA	NA	NA	NA	NA	NA	NA	NA	NA	NA	NA	NA	NA	NA	NA	NA	-30.0079	1.82646	5	chr7:39009285:39009377,chr7:39009032:39009131,chr7:39009285:39009330,chr7:39008849:39008933,chr7:39008732:39008778	4	27	0	27
55	DSP	NA	NA	NA	NA	NA	NA	NA	NA	NA	NA	NA	NA	NA	NA	NA	NA	18.436	-1.13605	6	chr23:47857160:47857252,chr23:47862462:47862513,chr23:47865008:47865051,chr23:47864045:47864075,chr23:47858118:47858138,chr23:47857208:47857291	8	116	116	0
56	ECHDC1	NA	NA	NA	NA	NA	NA	NA	NA	NA	NA	NA	NA	NA	NA	NA	NA	13.2177	-3.20866	2	chr9:23959098:23959137,chr9:23958400:23958415	0	22	22	0
57	ECHDC2	NA	NA	NA	NA	NA	NA	NA	NA	NA	NA	NA	NA	NA	NA	NA	NA	17.1405	-1.59176	3	chr3:93443451:93443491,chr3:93443012:93443107,chr3:93442704:93442770	2	48	46	2
58	ECM2	23.2707	-1.15501	2	chr8:84148398:84148519,chr8:84148725:84148765	5	11	11	0	NA	NA	NA	NA	NA	NA	NA	NA	NA	NA	NA	NA	NA	NA	NA	NA
59	EDNRB	15.7456	1.52982	1	chr12:53068502:53068510	0	10	10	0	NA	NA	NA	NA	NA	NA	NA	NA	NA	NA	NA	NA	NA	NA	NA	NA
60	EEF1D	NA	NA	NA	NA	NA	NA	NA	NA	NA	NA	NA	NA	NA	NA	NA	NA	14.9212	-1.42163	4	chr14:1115458:1115530,chr14:1115781:1115818,chr14:1116307:1116352,chr14:1116119:1116156	16	0	0	0
61	EFHC1	NA	NA	NA	NA	NA	NA	NA	NA	NA	NA	NA	NA	NA	NA	NA	NA	12.6409	-2.58704	1	chr23:24844639:24844681	0	9	9	0
62	EFHD1	NA	NA	NA	NA	NA	NA	NA	NA	NA	NA	NA	NA	NA	NA	NA	NA	15.2241	-3.92035	10	chr3:112405527:112405548,chr3:112407272:112407325,chr3:112407737:112407753,chr3:112398707:112398771,chr3:112403063:112403093,chr3:112407603:112407679,chr3:112417400:112417425,chr3:112407435:112407501,chr3:112414746:112414807,chr3:112415592:112415612	6	159	157	2
63	EHF	32.5232	-3.62736	1	chr15:65190097:65190172	4	24	24	0	NA	NA	NA	NA	NA	NA	NA	NA	36.5465	-3.62736	22	chr15:65197933:65198046,chr15:65198290:65198362,chr15:65195892:65195915,chr15:65196340:65196418,chr15:65207959:65208046,chr15:65195357:65195447,chr15:65198492:65198546,chr15:65205537:65205603,chr15:65205359:65205411,chr15:65193589:65193658,chr15:65196128:65196193,chr15:65203459:65203496,chr15:65205698:65205781,chr15:65192076:65192118,chr15:65201059:65201147,chr15:65195274:65195368,chr15:65192977:…	35	219	219	0
64	ELF3	27.6782	-1.20698	2	chr16:80508208:80508274,chr16:80508628:80508729	8	62	62	0	NA	NA	NA	NA	NA	NA	NA	NA	42.2252	-1.20698	2	chr16:80506822:80506872,chr16:80506661:80506728	4	17	17	0
65	ELF5	21.1866	-4.86271	1	chr15:65050531:65050606	0	19	19	0	NA	NA	NA	NA	NA	NA	NA	NA	32.468	-4.86271	1	chr15:65049739:65049794	1	47	47	0
66	ELMO3	NA	NA	NA	NA	NA	NA	NA	NA	25.1435	-1.4103	1	chr18:34835000:34835040	0	3	3	0	NA	NA	NA	NA	NA	NA	NA	NA
67	ELN	NA	NA	NA	NA	NA	NA	NA	NA	NA	NA	NA	NA	NA	NA	NA	NA	14.8072	1.24149	1	chr25:33309954:33309977	0	30	30	0
68	EPHB3	NA	NA	NA	NA	NA	NA	NA	NA	NA	NA	NA	NA	NA	NA	NA	NA	16.3794	-1.36925	7	chr1:82625532:82625568,chr1:82630223:82630254,chr1:82629403:82629467,chr1:82627481:82627574,chr1:82627894:82627996,chr1:82627573:82627672,chr1:82626551:82626592	12	76	76	0
69	EPHX1	26.1184	-2.29049	1	chr16:28833155:28833194	0	8	8	0	NA	NA	NA	NA	NA	NA	NA	NA	NA	NA	NA	NA	NA	NA	NA	NA
70	ERRFI1	NA	NA	NA	NA	NA	NA	NA	NA	NA	NA	NA	NA	NA	NA	NA	NA	20.8794	-1.05738	9	chr16:45354420:45354442,chr16:45356306:45356428,chr16:45356216:45356311,chr16:45361964:45361998,chr16:45359703:45359792,chr16:45356053:45356060,chr16:45357103:45357203,chr16:45356532:45356579,chr16:45354007:45354090	21	132	131	1
71	EVI2B	-10.3144	1.2374	2	chr19:18674624:18674707,chr19:18674247:18674278	5	11	1	10	NA	NA	NA	NA	NA	NA	NA	NA	-33.1591	1.2374	2	chr19:18678541:18678614,chr19:18681244:18681280	3	37	2	35
72	FAM167A	NA	NA	NA	NA	NA	NA	NA	NA	NA	NA	NA	NA	NA	NA	NA	NA	12.3529	1.25027	1	chr8:7900662:7900677	0	16	16	0
73	FAM167B	NA	NA	NA	NA	NA	NA	NA	NA	26.9348	2.32278	1	chr2:121286590:121286621	6	12	12	0	NA	NA	NA	NA	NA	NA	NA	NA
74	FAT2	11.951	-2.59077	1	chr7:62776222:62776299	3	12	12	0	NA	NA	NA	NA	NA	NA	NA	NA	NA	NA	NA	NA	NA	NA	NA	NA
75	FCER1G	NA	NA	NA	NA	NA	NA	NA	NA	NA	NA	NA	NA	NA	NA	NA	NA	-47.4269	1.4731	2	chr3:8288984:8289033,chr3:8289091:8289130	0	37	0	37
76	FCGR2A	-11.876	1.20801	1	chr3:8045556:8045649	0	9	1	8	NA	NA	NA	NA	NA	NA	NA	NA	NA	NA	NA	NA	NA	NA	NA	NA
77	FERMT3	NA	NA	NA	NA	NA	NA	NA	NA	NA	NA	NA	NA	NA	NA	NA	NA	-41.0818	1.06567	1	chr29:42511193:42511262	10	22	0	22
78	FES	11.5683	1.32341	1	chr21:21781132:21781173	0	14	10	4	NA	NA	NA	NA	NA	NA	NA	NA	NA	NA	NA	NA	NA	NA	NA	NA
79	FGR	NA	NA	NA	NA	NA	NA	NA	NA	NA	NA	NA	NA	NA	NA	NA	NA	-10.6249	1.74265	1	chr2:125695564:125695598	0	34	0	34
80	FHL3	NA	NA	NA	NA	NA	NA	NA	NA	NA	NA	NA	NA	NA	NA	NA	NA	-11.8329	1.19377	2	chr3:107960650:107960763,chr3:107960566:107960589	9	25	0	25
81	FOLR3	14.1567	-5.10215	1	chr15:51783467:51783569	0	26	26	0	NA	NA	NA	NA	NA	NA	NA	NA	24.7531	-5.10215	1	chr15:51783467:51783569	0	2	2	0
82	FOXI1	10.9974	-2.4675	1	chr20:2011888:2011937	0	10	9	1	NA	NA	NA	NA	NA	NA	NA	NA	NA	NA	NA	NA	NA	NA	NA	NA
83	FRMD6	NA	NA	NA	NA	NA	NA	NA	NA	NA	NA	NA	NA	NA	NA	NA	NA	30.5	-1.51173	1	chr10:44331079:44331117	0	68	60	8
84	FXYD6	16.0612	-2.11184	1	chr15:28535933:28535967	3	10	10	0	NA	NA	NA	NA	NA	NA	NA	NA	NA	NA	NA	NA	NA	NA	NA	NA
85	FZD1	NA	NA	NA	NA	NA	NA	NA	NA	11.1423	-1.69487	3	chr4:8668254:8668297,chr4:8668573:8668582,chr4:8669146:8669260	0	148	148	0	NA	NA	NA	NA	NA	NA	NA	NA
86	G0S2	15.2139	2.27792	1	chr16:73642104:73642124	0	3	3	0	NA	NA	NA	NA	NA	NA	NA	NA	NA	NA	NA	NA	NA	NA	NA	NA
87	GAPT	NA	NA	NA	NA	NA	NA	NA	NA	NA	NA	NA	NA	NA	NA	NA	NA	-27.1537	1.67254	1	chr20:20810284:20810307	0	9	0	9
88	GATA3	NA	NA	NA	NA	NA	NA	NA	NA	NA	NA	NA	NA	NA	NA	NA	NA	-13.6396	-2.60106	5	chr13:15923921:15923978,chr13:15924063:15924134,chr13:15922770:15922814,chr13:15922406:15922437,chr13:15923566:15923608	18	99	99	0
89	GCK	NA	NA	NA	NA	NA	NA	NA	NA	NA	NA	NA	NA	NA	NA	NA	NA	10.8424	-4.6552	4	chr4:77141697:77141733,chr4:77140889:77140989,chr4:77144006:77144019,chr4:77141412:77141490	3	63	63	0
90	GCSAM	-14.1837	-1.91811	1	chr1:56944705:56944797	0	4	0	4	NA	NA	NA	NA	NA	NA	NA	NA	NA	NA	NA	NA	NA	NA	NA	NA
91	GGT5	NA	NA	NA	NA	NA	NA	NA	NA	NA	NA	NA	NA	NA	NA	NA	NA	-34.0539	1.66467	4	chr17:71450459:71450560,chr17:71452655:71452702,chr17:71451161:71451185,chr17:71451270:71451337	18	82	0	82
92	GIPC2	21.8706	-4.9909	1	chr3:66637835:66637861	3	7	6	1	NA	NA	NA	NA	NA	NA	NA	NA	10.8447	-4.9909	2	chr3:66636287:66636333,chr3:66633924:66633954	6	46	46	0
93	GLT8D2	12.839	-4.44588	1	chr5:67696732:67696804	0	10	10	0	NA	NA	NA	NA	NA	NA	NA	NA	NA	NA	NA	NA	NA	NA	NA	NA
94	GLYCAM1	24.7505	-5.37307	2	chr5:25477305:25477358,chr5:25478304:25478349	3	15	15	0	NA	NA	NA	NA	NA	NA	NA	NA	21.3006	-5.37307	1	chr5:25479629:25479717	0	8	8	0
95	GOLPH3L	NA	NA	NA	NA	NA	NA	NA	NA	NA	NA	NA	NA	NA	NA	NA	NA	13.9244	-1.91256	1	chr3:20043084:20043143	0	19	15	4
96	GPD1	21.4168	-3.83358	1	chr5:29796563:29796611	3	15	15	0	NA	NA	NA	NA	NA	NA	NA	NA	38.4268	-3.83358	2	chr5:29794209:29794234,chr5:29794583:29794673	0	4	4	0
97	GPR19	NA	NA	NA	NA	NA	NA	NA	NA	NA	NA	NA	NA	NA	NA	NA	NA	15.8212	-2.3774	1	chr5:97147288:97147321	0	12	9	3
98	GPR4	15.6389	1.88885	1	chr18:53192076:53192140	0	9	0	9	NA	NA	NA	NA	NA	NA	NA	NA	NA	NA	NA	NA	NA	NA	NA	NA
99	GPR84	-17.1494	2.04742	1	chr5:25709289:25709314	0	22	0	22	NA	NA	NA	NA	NA	NA	NA	NA	NA	NA	NA	NA	NA	NA	NA	NA
100	GRB7	NA	NA	NA	NA	NA	NA	NA	NA	NA	NA	NA	NA	NA	NA	NA	NA	24.5417	-1.07072	5	chr19:40104489:40104587,chr19:40105136:40105241,chr19:40105208:40105309,chr19:40105558:40105591,chr19:40104828:40104869	11	36	36	0
101	GRHL1	NA	NA	NA	NA	NA	NA	NA	NA	NA	NA	NA	NA	NA	NA	NA	NA	15.7139	-2.55501	1	chr11:87635033:87635098	3	17	17	0
102	GSAP	22.8288	1.58725	3	chr4:43814789:43814816,chr4:43814618:43814683,chr4:43814449:43814532	10	23	23	0	NA	NA	NA	NA	NA	NA	NA	NA	NA	NA	NA	NA	NA	NA	NA	NA
103	GZMK	-24.3645	1.01631	1	chr20:24085425:24085473	2	9	0	9	NA	NA	NA	NA	NA	NA	NA	NA	NA	NA	NA	NA	NA	NA	NA	NA
104	HCK	12.7645	2.08768	1	chr13:61561708:61561786	0	12	12	0	NA	NA	NA	NA	NA	NA	NA	NA	NA	NA	NA	NA	NA	NA	NA	NA
105	HOXA5	34.1946	-1.14851	2	chr4:68898086:68898110,chr4:68898583:68898642	2	84	84	0	38.5228	-1.14851	1	chr4:68899492:68899600	0	74	74	0	NA	NA	NA	NA	NA	NA	NA	NA
106	HPN	29.7101	-3.7142	2	chr18:45781772:45781816,chr18:45782519:45782613	3	30	30	0	NA	NA	NA	NA	NA	NA	NA	NA	50.5828	-3.7142	2	chr18:45783310:45783390,chr18:45783164:45783234	0	10	10	0
107	HSD17B1	24.9106	1.53655	1	chr19:42627077:42627142	5	14	14	0	NA	NA	NA	NA	NA	NA	NA	NA	NA	NA	NA	NA	NA	NA	NA	NA
108	IFITM1	NA	NA	NA	NA	NA	NA	NA	NA	-23.107	1.59568	1	chr29:50934711:50934732	0	16	0	16	NA	NA	NA	NA	NA	NA	NA	NA
109	IGSF5	32.5885	-2.27042	1	chr1:139826867:139826909	0	123	123	0	NA	NA	NA	NA	NA	NA	NA	NA	NA	NA	NA	NA	NA	NA	NA	NA
110	IL2RA	NA	NA	NA	NA	NA	NA	NA	NA	-13.1882	1.04109	1	chr13:17455401:17455428	5	7	0	7	NA	NA	NA	NA	NA	NA	NA	NA
111	IL34	29.2924	-1.41839	3	chr18:1571632:1571693,chr18:1571128:1571162,chr18:1571576:1571654	1	12	12	0	NA	NA	NA	NA	NA	NA	NA	NA	NA	NA	NA	NA	NA	NA	NA	NA
112	IRF6	NA	NA	NA	NA	NA	NA	NA	NA	NA	NA	NA	NA	NA	NA	NA	NA	19.7956	-2.10206	2	chr16:73505968:73506029,chr16:73503459:73503516	3	44	43	1
113	ISYNA1	24.7093	1.05368	2	chr7:4736772:4736857,chr7:4737268:4737319	0	12	12	0	NA	NA	NA	NA	NA	NA	NA	NA	NA	NA	NA	NA	NA	NA	NA	NA
114	KCNK5	NA	NA	NA	NA	NA	NA	NA	NA	NA	NA	NA	NA	NA	NA	NA	NA	21.6361	-2.36817	17	chr23:13068615:13068711,chr23:13097060:13097076,chr23:13097965:13097992,chr23:13099588:13099626,chr23:13099853:13099915,chr23:13095081:13095114,chr23:13084637:13084656,chr23:13078008:13078090,chr23:13096442:13096473,chr23:13069044:13069084,chr23:13098124:13098149,chr23:13087385:13087410,chr23:13099204:13099271,chr23:13084392:13084436,chr23:13068790:13068855,chr23:13086481:13086526,chr23:13098826:…	33	318	317	1
115	KLF9	NA	NA	NA	NA	NA	NA	NA	NA	NA	NA	NA	NA	NA	NA	NA	NA	12.0723	-2.059	5	chr8:46609966:46609993,chr8:46609759:46609766,chr8:46610201:46610231,chr8:46608934:46608947,chr8:46609144:46609229	4	82	76	6
116	KLHL21	NA	NA	NA	NA	NA	NA	NA	NA	NA	NA	NA	NA	NA	NA	NA	NA	30.2775	-1.06099	2	chr16:46802293:46802326,chr16:46801666:46801692	16	45	45	0
117	KRT15	20.3471	-1.79265	1	chr19:41726622:41726661	0	15	15	0	NA	NA	NA	NA	NA	NA	NA	NA	NA	NA	NA	NA	NA	NA	NA	NA
118	L3HYPDH	NA	NA	NA	NA	NA	NA	NA	NA	NA	NA	NA	NA	NA	NA	NA	NA	21.7847	-1.03134	1	chr10:71758862:71758944	8	29	29	0
119	LAD1	NA	NA	NA	NA	NA	NA	NA	NA	NA	NA	NA	NA	NA	NA	NA	NA	16.7562	-1.0462	4	chr16:80916490:80916542,chr16:80920466:80920571,chr16:80917011:80917056,chr16:80917397:80917483	0	65	63	2
120	LAMB3	-14.1124	1.64587	4	chr16:73666929:73667026,chr16:73668618:73668706,chr16:73668065:73668119,chr16:73667888:73667977	2	62	62	0	NA	NA	NA	NA	NA	NA	NA	NA	NA	NA	NA	NA	NA	NA	NA	NA
121	LARGE2	33.0677	-1.35019	2	chr15:75950535:75950603,chr15:75949277:75949359	5	21	21	0	NA	NA	NA	NA	NA	NA	NA	NA	NA	NA	NA	NA	NA	NA	NA	NA
122	LBP	15.2989	-2.78437	1	chr13:67214863:67214935	0	3	3	0	41.0546	-2.78437	1	chr13:67214863:67214935	0	7	7	0	NA	NA	NA	NA	NA	NA	NA	NA
123	LNX1	24.585	-1.39055	3	chr6:69133961:69134058,chr6:69135314:69135354,chr6:69135294:69135391	1	10	10	0	NA	NA	NA	NA	NA	NA	NA	NA	NA	NA	NA	NA	NA	NA	NA	NA
124	LOC407171	-12.7872	1.91468	1	chr18:62945553:62945573	0	22	8	14	NA	NA	NA	NA	NA	NA	NA	NA	NA	NA	NA	NA	NA	NA	NA	NA
125	LOC508666	NA	NA	NA	NA	NA	NA	NA	NA	-46.9947	1.36022	2	chr19:14445531:14445613,chr19:14445583:14445692	3	5	0	5	NA	NA	NA	NA	NA	NA	NA	NA
126	LOC511175	NA	NA	NA	NA	NA	NA	NA	NA	NA	NA	NA	NA	NA	NA	NA	NA	-10.4375	-2.63259	1	chr6:24692244:24692298	0	11	0	11
127	LOC615514	22.7686	-2.18513	1	chr3:33686164:33686234	0	12	12	0	28.2777	-2.18513	1	chr3:33685976:33686010	0	8	8	0	NA	NA	NA	NA	NA	NA	NA	NA
128	LOC781977	18.8975	-1.05454	2	chr19:50527443:50527489,chr19:50528220:50528241	3	13	13	0	NA	NA	NA	NA	NA	NA	NA	NA	NA	NA	NA	NA	NA	NA	NA	NA
129	LOC786914	16.506	-1.87472	2	chr21:66929352:66929401,chr21:66929555:66929640	0	7	7	0	NA	NA	NA	NA	NA	NA	NA	NA	NA	NA	NA	NA	NA	NA	NA	NA
130	LPAR5	NA	NA	NA	NA	NA	NA	NA	NA	NA	NA	NA	NA	NA	NA	NA	NA	30.2639	1.37842	1	chr5:103798699:103798751	0	33	14	19
131	LYL1	NA	NA	NA	NA	NA	NA	NA	NA	-52.6636	1.25999	1	chr7:12475843:12475858	2	9	0	9	NA	NA	NA	NA	NA	NA	NA	NA
132	MAPK13	NA	NA	NA	NA	NA	NA	NA	NA	NA	NA	NA	NA	NA	NA	NA	NA	42.0694	-3.17098	3	chr23:10059325:10059371,chr23:10059212:10059237,chr23:10059647:10059671	10	21	21	0
133	MASP1	NA	NA	NA	NA	NA	NA	NA	NA	30.6444	-3.60655	1	chr1:80006309:80006322	0	0	0	0	NA	NA	NA	NA	NA	NA	NA	NA
134	MATN2	19.4071	-1.94128	1	chr14:66360650:66360667	6	14	14	0	NA	NA	NA	NA	NA	NA	NA	NA	NA	NA	NA	NA	NA	NA	NA	NA
135	MICALL2	17.1641	-2.05812	4	chr25:41459578:41459648,chr25:41459951:41459999,chr25:41459499:41459590,chr25:41460255:41460320	5	37	37	0	NA	NA	NA	NA	NA	NA	NA	NA	23.9174	-2.05812	3	chr25:41466874:41466921,chr25:41466138:41466240,chr25:41465500:41465586	16	199	199	0
136	MMP14	NA	NA	NA	NA	NA	NA	NA	NA	NA	NA	NA	NA	NA	NA	NA	NA	13.0878	1.40462	1	chr10:21975272:21975293	0	15	15	0
137	MPL	NA	NA	NA	NA	NA	NA	NA	NA	-36	-1.94883	1	chr3:102678060:102678112	0	0	0	0	NA	NA	NA	NA	NA	NA	NA	NA
138	MRPL14	15.8416	-1.20755	3	chr23:17648978:17649032,chr23:17648733:17648846,chr23:17648822:17648904	5	22	18	4	NA	NA	NA	NA	NA	NA	NA	NA	NA	NA	NA	NA	NA	NA	NA	NA
139	MSTN	22.1794	-2.22833	1	chr2:6278768:6278809	0	2	2	0	NA	NA	NA	NA	NA	NA	NA	NA	NA	NA	NA	NA	NA	NA	NA	NA
140	MUC15	19.5769	-4.92593	1	chr15:57285544:57285604	0	11	11	0	NA	NA	NA	NA	NA	NA	NA	NA	NA	NA	NA	NA	NA	NA	NA	NA
141	MXRA8	26.4924	-1.496	2	chr16:51170986:51171070,chr16:51171832:51171883	0	9	9	0	NA	NA	NA	NA	NA	NA	NA	NA	NA	NA	NA	NA	NA	NA	NA	NA
142	NCF1	NA	NA	NA	NA	NA	NA	NA	NA	NA	NA	NA	NA	NA	NA	NA	NA	-15.7055	2.34265	3	chr25:32769227:32769234,chr25:32772524:32772560,chr25:32768900:32768952	7	43	7	36
143	NCF2	NA	NA	NA	NA	NA	NA	NA	NA	-12.9103	1.24651	1	chr16:64638477:64638502	2	2	0	2	NA	NA	NA	NA	NA	NA	NA	NA
144	NEDD9	NA	NA	NA	NA	NA	NA	NA	NA	-37.6439	-1.71038	1	chr23:45098636:45098697	0	13	13	0	NA	NA	NA	NA	NA	NA	NA	NA
145	NFE2	NA	NA	NA	NA	NA	NA	NA	NA	NA	NA	NA	NA	NA	NA	NA	NA	-30.2899	1.71418	1	chr5:25773464:25773493	8	50	0	50
146	NFIB	NA	NA	NA	NA	NA	NA	NA	NA	NA	NA	NA	NA	NA	NA	NA	NA	22.3964	-3.70449	7	chr8:29858252:29858338,chr8:29857019:29857071,chr8:29857950:29858040,chr8:29858843:29858930,chr8:29853735:29853821,chr8:29857686:29857776,chr8:29857303:29857340	9	83	83	0
147	NOS2	10.6739	2.27551	1	chr19:19431115:19431185	1	13	1	12	NA	NA	NA	NA	NA	NA	NA	NA	NA	NA	NA	NA	NA	NA	NA	NA
148	NOSTRIN	NA	NA	NA	NA	NA	NA	NA	NA	37.9668	-3.79013	1	chr2:27332125:27332169	0	2	2	0	12.4845	-3.79013	1	chr2:27332125:27332169	0	18	18	0
149	NR4A1	-10.7365	-1.12475	1	chr5:27839376:27839428	1	7	0	7	NA	NA	NA	NA	NA	NA	NA	NA	NA	NA	NA	NA	NA	NA	NA	NA
150	NRROS	-22.2366	1.13113	1	chr1:71154841:71154885	6	13	0	13	NA	NA	NA	NA	NA	NA	NA	NA	NA	NA	NA	NA	NA	NA	NA	NA
151	NTRK3	13.1021	-1.44329	1	chr21:19262066:19262154	0	1	1	0	NA	NA	NA	NA	NA	NA	NA	NA	NA	NA	NA	NA	NA	NA	NA	NA
152	NUPR1	NA	NA	NA	NA	NA	NA	NA	NA	42.5111	-1.44113	1	chr25:26083189:26083252	5	9	9	0	31.6021	-1.44113	1	chr25:26083189:26083252	5	10	10	0
153	OVOL1	NA	NA	NA	NA	NA	NA	NA	NA	NA	NA	NA	NA	NA	NA	NA	NA	17.8791	-2.24896	2	chr29:43913664:43913726,chr29:43914854:43914874	10	110	109	1
154	P2RY13	-44.0551	2.12732	1	chr1:116755563:116755661	0	17	0	17	NA	NA	NA	NA	NA	NA	NA	NA	NA	NA	NA	NA	NA	NA	NA	NA
155	PAEP	17.3794	-5.55113	1	chr11:103256050:103256061	0	24	24	0	NA	NA	NA	NA	NA	NA	NA	NA	NA	NA	NA	NA	NA	NA	NA	NA
156	PAK4	NA	NA	NA	NA	NA	NA	NA	NA	NA	NA	NA	NA	NA	NA	NA	NA	23.5852	-1.17531	20	chr18:48882120:48882189,chr18:48887356:48887380,chr18:48854131:48854211,chr18:48883244:48883307,chr18:48855135:48855164,chr18:48882720:48882744,chr18:48865400:48865483,chr18:48881317:48881352,chr18:48882247:48882313,chr18:48888259:48888304,chr18:48880966:48881027,chr18:48887153:48887172,chr18:48877916:48877956,chr18:48879348:48879445,chr18:48883088:48883153,chr18:48854658:48854692,chr18:48853862:…	28	440	435	5
157	PARD6B	NA	NA	NA	NA	NA	NA	NA	NA	NA	NA	NA	NA	NA	NA	NA	NA	15.0657	-1.2262	1	chr13:78708171:78708264	4	34	34	0
158	PGF	11.603	-2.1294	1	chr10:86214686:86214748	0	15	15	0	NA	NA	NA	NA	NA	NA	NA	NA	25.9596	-2.1294	1	chr10:86212852:86212868	1	5	5	0
159	PIGR	11.3464	-4.5928	3	chr16:4731036:4731053,chr16:4731036:4731090,chr16:4730884:4730954	15	18	18	0	NA	NA	NA	NA	NA	NA	NA	NA	19.5356	-4.5928	1	chr16:4725600:4725660	0	72	66	6
160	PKP3	NA	NA	NA	NA	NA	NA	NA	NA	NA	NA	NA	NA	NA	NA	NA	NA	29.7686	-1.35614	1	chr29:50884325:50884385	0	58	58	0
161	PLA2G3	NA	NA	NA	NA	NA	NA	NA	NA	18.0882	-2.1788	1	chr17:69988131:69988152	6	13	13	0	33.3029	-2.1788	3	chr17:69987036:69987106,chr17:69987516:69987532,chr17:69986701:69986751	8	25	25	0
162	PLEK	NA	NA	NA	NA	NA	NA	NA	NA	-38.4036	2.0304	1	chr11:66787670:66787703	4	5	0	5	NA	NA	NA	NA	NA	NA	NA	NA
163	PLEKHB1	NA	NA	NA	NA	NA	NA	NA	NA	NA	NA	NA	NA	NA	NA	NA	NA	24.2354	-2.86898	2	chr15:53122702:53122806,chr15:53122744:53122806	0	0	0	0
164	PLEKHO2	NA	NA	NA	NA	NA	NA	NA	NA	NA	NA	NA	NA	NA	NA	NA	NA	-14.5462	1.66912	2	chr10:45255000:45255058,chr10:45254657:45254722	1	17	0	17
165	PPP1R18	NA	NA	NA	NA	NA	NA	NA	NA	-21.409	1.60997	3	chr23:28325978:28326037,chr23:28325902:28325939,chr23:28325902:28325992	3	35	0	35	-12.4239	1.60997	1	chr23:28326992:28327004	6	27	0	27
166	PRKAR1B	12.5365	-2.44812	1	chr25:41916635:41916658	0	11	11	0	NA	NA	NA	NA	NA	NA	NA	NA	NA	NA	NA	NA	NA	NA	NA	NA
167	PROM1	NA	NA	NA	NA	NA	NA	NA	NA	NA	NA	NA	NA	NA	NA	NA	NA	13.0833	-1.65731	3	chr6:111246896:111246932,chr6:111246496:111246592,chr6:111266050:111266122	3	113	57	56
168	PRR15L	NA	NA	NA	NA	NA	NA	NA	NA	NA	NA	NA	NA	NA	NA	NA	NA	20.5533	-1.46683	3	chr19:38511341:38511404,chr19:38513687:38513772,chr19:38515077:38515104	0	24	24	0
169	PRSS8	13.9493	-1.27549	2	chr25:27233756:27233781,chr25:27233390:27233424	0	10	10	0	44.5132	-1.27549	2	chr25:27233108:27233212,chr25:27233205:27233296	2	9	9	0	42.2275	-1.27549	5	chr25:27231884:27231931,chr25:27231828:27231901,chr25:27232302:27232399,chr25:27232497:27232613,chr25:27231325:27231355	6	40	40	0
170	PTGDS	29.9314	-2.06014	1	chr11:106021500:106021539	0	34	34	0	NA	NA	NA	NA	NA	NA	NA	NA	NA	NA	NA	NA	NA	NA	NA	NA
171	PTPN22	-39.8436	-1.66062	1	chr3:29518353:29518441	0	15	0	15	NA	NA	NA	NA	NA	NA	NA	NA	NA	NA	NA	NA	NA	NA	NA	NA
172	PYROXD2	15.6241	-1.30141	1	chr26:19495671:19495706	0	29	29	0	NA	NA	NA	NA	NA	NA	NA	NA	NA	NA	NA	NA	NA	NA	NA	NA
173	QPRT	-18.5051	-1.50289	1	chr25:26507480:26507501	3	20	1	19	NA	NA	NA	NA	NA	NA	NA	NA	NA	NA	NA	NA	NA	NA	NA	NA
174	RAB25	NA	NA	NA	NA	NA	NA	NA	NA	39.9846	-2.19839	1	chr3:14707922:14707978	0	11	11	0	10.6099	-2.19839	2	chr3:14707101:14707145,chr3:14707480:14707562	0	22	21	1
175	RAPGEFL1	NA	NA	NA	NA	NA	NA	NA	NA	NA	NA	NA	NA	NA	NA	NA	NA	27.5269	-1.54538	1	chr19:40461828:40461899	1	10	10	0
176	RASSF4	NA	NA	NA	NA	NA	NA	NA	NA	NA	NA	NA	NA	NA	NA	NA	NA	21.9014	-1.83562	7	chr28:44620937:44621032,chr28:44622111:44622151,chr28:44621389:44621427,chr28:44620357:44620409,chr28:44621485:44621588,chr28:44617094:44617172,chr28:44625194:44625271	15	109	105	4
177	REEP6	NA	NA	NA	NA	NA	NA	NA	NA	NA	NA	NA	NA	NA	NA	NA	NA	12.9521	-4.04198	1	chr7:43897180:43897277	7	18	18	0
178	RHOC	NA	NA	NA	NA	NA	NA	NA	NA	NA	NA	NA	NA	NA	NA	NA	NA	16.8559	-2.25015	4	chr3:30619606:30619646,chr3:30620746:30620786,chr3:30620469:30620519,chr3:30620518:30620584	0	45	45	0
179	RHPN2	NA	NA	NA	NA	NA	NA	NA	NA	NA	NA	NA	NA	NA	NA	NA	NA	12.7263	-3.01887	3	chr18:43461405:43461497,chr18:43461137:43461225,chr18:43472543:43472591	18	71	70	1
180	RILPL2	NA	NA	NA	NA	NA	NA	NA	NA	NA	NA	NA	NA	NA	NA	NA	NA	-14.2396	1.48921	2	chr17:52181202:52181249,chr17:52182006:52182048	5	42	9	33
181	RINL	-10.5873	-1.14231	2	chr18:48594133:48594175,chr18:48595654:48595692	5	11	0	11	NA	NA	NA	NA	NA	NA	NA	NA	NA	NA	NA	NA	NA	NA	NA	NA
182	RIPK4	NA	NA	NA	NA	NA	NA	NA	NA	NA	NA	NA	NA	NA	NA	NA	NA	22.259	-1.17311	5	chr1:142035374:142035442,chr1:142036233:142036299,chr1:142036286:142036299,chr1:142031325:142031373,chr1:142035575:142035600	18	114	114	0
183	RNF43	NA	NA	NA	NA	NA	NA	NA	NA	NA	NA	NA	NA	NA	NA	NA	NA	29.0114	-1.55014	16	chr19:9347391:9347485,chr19:9340011:9340035,chr19:9363235:9363338,chr19:9363594:9363652,chr19:9342044:9342103,chr19:9363323:9363400,chr19:9374182:9374263,chr19:9347119:9347145,chr19:9376180:9376217,chr19:9346830:9346897,chr19:9340123:9340149,chr19:9376070:9376108,chr19:9346887:9346961,chr19:9363553:9363597,chr19:9363235:9363271,chr19:9382619:9382696	28	172	167	5
184	RP1	13.2598	-1.29255	1	chr14:22333479:22333553	4	8	8	0	NA	NA	NA	NA	NA	NA	NA	NA	NA	NA	NA	NA	NA	NA	NA	NA
185	S100B	NA	NA	NA	NA	NA	NA	NA	NA	NA	NA	NA	NA	NA	NA	NA	NA	10.9452	-4.89384	1	chr1:146278112:146278181	0	18	18	0
186	SBNO2	24.1718	1.19923	1	chr7:43632937:43632968	0	10	10	0	NA	NA	NA	NA	NA	NA	NA	NA	NA	NA	NA	NA	NA	NA	NA	NA
187	SCGB1D	NA	NA	NA	NA	NA	NA	NA	NA	NA	NA	NA	NA	NA	NA	NA	NA	33.0337	-7.1922	1	chr29:40683144:40683229	0	4	4	0
188	SCGB2A2	NA	NA	NA	NA	NA	NA	NA	NA	43.3125	-4.82615	1	chr29:40699804:40699862	5	2	2	0	19.4607	-4.82615	2	chr29:40699804:40699862,chr29:40700024:40700057	5	11	11	0
189	SCNN1A	15.135	-2.06393	1	chr5:103993026:103993038	0	6	3	3	NA	NA	NA	NA	NA	NA	NA	NA	NA	NA	NA	NA	NA	NA	NA	NA
190	SELENOF	NA	NA	NA	NA	NA	NA	NA	NA	NA	NA	NA	NA	NA	NA	NA	NA	12.8194	-1.57614	1	chr3:57146984:57147008	0	31	31	0
191	SERPINA1	14.4597	-2.25164	4	chr21:59085944:59086041,chr21:59086580:59086646,chr21:59086040:59086099,chr21:59086317:59086386	9	24	24	0	NA	NA	NA	NA	NA	NA	NA	NA	NA	NA	NA	NA	NA	NA	NA	NA
192	SERPINB5	NA	NA	NA	NA	NA	NA	NA	NA	NA	NA	NA	NA	NA	NA	NA	NA	11.9692	-3.16537	1	chr24:61731272:61731296	6	40	35	5
193	SERPING1	14.9772	-1.69462	1	chr15:80849019:80849095	0	17	17	0	NA	NA	NA	NA	NA	NA	NA	NA	NA	NA	NA	NA	NA	NA	NA	NA
194	SFN	18.6633	-2.26315	2	chr2:126342393:126342408,chr2:126341715:126341782	3	15	13	2	NA	NA	NA	NA	NA	NA	NA	NA	NA	NA	NA	NA	NA	NA	NA	NA
195	SH3GLB2	12.8289	-1.2617	1	chr11:99508558:99508639	4	15	15	0	NA	NA	NA	NA	NA	NA	NA	NA	21.1234	-1.2617	7	chr11:99505549:99505656,chr11:99503220:99503272,chr11:99503469:99503478,chr11:99505655:99505714,chr11:99505408:99505509,chr11:99503093:99503106,chr11:99505924:99505958	12	79	79	0
196	SH3RF2	NA	NA	NA	NA	NA	NA	NA	NA	NA	NA	NA	NA	NA	NA	NA	NA	17.5123	-3.2598	2	chr7:57150428:57150486,chr7:57195290:57195327	3	82	65	17
197	SLA2	NA	NA	NA	NA	NA	NA	NA	NA	NA	NA	NA	NA	NA	NA	NA	NA	14.6698	-1.83447	1	chr13:65736299:65736358	0	11	7	4
198	SLC11A1	-23.9709	1.76241	1	chr2:106392679:106392696	0	28	0	28	NA	NA	NA	NA	NA	NA	NA	NA	NA	NA	NA	NA	NA	NA	NA	NA
199	SLC11A2	19.9268	1.02017	2	chr5:28721561:28721622,chr5:28721419:28721479	6	15	15	0	NA	NA	NA	NA	NA	NA	NA	NA	NA	NA	NA	NA	NA	NA	NA	NA
200	SLC13A2	NA	NA	NA	NA	NA	NA	NA	NA	NA	NA	NA	NA	NA	NA	NA	NA	18.9922	-2.27098	5	chr19:19944652:19944721,chr19:19950289:19950372,chr19:19950702:19950757,chr19:19950337:19950372,chr19:19950735:19950806	15	119	119	0
201	SLC15A2	NA	NA	NA	NA	NA	NA	NA	NA	39.5833	-3.59323	1	chr1:66366698:66366735	3	3	3	0	NA	NA	NA	NA	NA	NA	NA	NA
202	SLC22A31	NA	NA	NA	NA	NA	NA	NA	NA	NA	NA	NA	NA	NA	NA	NA	NA	25.1972	-3.03775	1	chr18:14281550:14281618	0	14	14	0
203	SLC22A5	NA	NA	NA	NA	NA	NA	NA	NA	NA	NA	NA	NA	NA	NA	NA	NA	17.1727	-1.66338	4	chr7:22054062:22054077,chr7:22058318:22058330,chr7:22058329:22058414,chr7:22059456:22059462	17	41	41	0
204	SLC25A35	NA	NA	NA	NA	NA	NA	NA	NA	20.4262	-1.76114	2	chr19:27908546:27908582,chr19:27908429:27908451	4	14	14	0	NA	NA	NA	NA	NA	NA	NA	NA
205	SLC28A1	NA	NA	NA	NA	NA	NA	NA	NA	NA	NA	NA	NA	NA	NA	NA	NA	32.4797	-1.41215	1	chr21:22524897:22525006	0	7	7	0
206	SLC28A3	NA	NA	NA	NA	NA	NA	NA	NA	NA	NA	NA	NA	NA	NA	NA	NA	11.3879	-3.14838	1	chr8:77559117:77559200	0	77	75	2
207	SLC34A2	23.6332	-5.52128	1	chr6:45178252:45178310	0	11	11	0	NA	NA	NA	NA	NA	NA	NA	NA	NA	NA	NA	NA	NA	NA	NA	NA
208	SLC38A3	NA	NA	NA	NA	NA	NA	NA	NA	NA	NA	NA	NA	NA	NA	NA	NA	12.9966	-3.58519	2	chr22:50139312:50139400,chr22:50139089:50139096	0	73	73	0
209	SLC39A14	NA	NA	NA	NA	NA	NA	NA	NA	NA	NA	NA	NA	NA	NA	NA	NA	11.9698	-1.61805	5	chr8:69686722:69686745,chr8:69683780:69683821,chr8:69710144:69710190,chr8:69694255:69694301,chr8:69702634:69702673	9	71	69	2
210	SLC44A4	25.9706	1.18848	1	chr23:27480104:27480139	2	17	17	0	NA	NA	NA	NA	NA	NA	NA	NA	NA	NA	NA	NA	NA	NA	NA	NA
211	SLC5A1	16.1808	-2.96543	1	chr17:70571875:70571910	0	7	7	0	NA	NA	NA	NA	NA	NA	NA	NA	22.081	-2.96543	1	chr17:70572778:70572844	0	20	20	0
212	SLC7A4	23.1369	-3.90188	1	chr17:72376962:72376982	0	18	18	0	NA	NA	NA	NA	NA	NA	NA	NA	NA	NA	NA	NA	NA	NA	NA	NA
213	SLC8A1	19.5199	-1.29243	1	chr11:22855034:22855112	0	8	8	0	NA	NA	NA	NA	NA	NA	NA	NA	NA	NA	NA	NA	NA	NA	NA	NA
214	SNX33	NA	NA	NA	NA	NA	NA	NA	NA	NA	NA	NA	NA	NA	NA	NA	NA	17.7397	-1.62677	2	chr21:33238681:33238784,chr21:33239161:33239229	7	31	31	0
215	SOX10	39.5779	-3.63692	2	chr5:109770452:109770528,chr5:109768969:109769050	0	20	20	0	NA	NA	NA	NA	NA	NA	NA	NA	NA	NA	NA	NA	NA	NA	NA	NA
216	SPI1	NA	NA	NA	NA	NA	NA	NA	NA	NA	NA	NA	NA	NA	NA	NA	NA	-21.8687	1.12694	4	chr15:77216892:77216958,chr15:77217092:77217147,chr15:77217006:77217093,chr15:77216146:77216186	2	48	0	48
217	SPINT2	NA	NA	NA	NA	NA	NA	NA	NA	NA	NA	NA	NA	NA	NA	NA	NA	18.757	-2.13911	8	chr18:48097154:48097180,chr18:48094568:48094605,chr18:48079779:48079813,chr18:48082589:48082683,chr18:48092662:48092738,chr18:48086564:48086579,chr18:48097983:48098036,chr18:48081423:48081484	1	107	107	0
218	SRGN	NA	NA	NA	NA	NA	NA	NA	NA	NA	NA	NA	NA	NA	NA	NA	NA	-19.6893	1.13408	3	chr28:25477467:25477579,chr28:25475655:25475712,chr28:25475910:25476011	0	51	2	49
219	STAP2	12.9387	-3.38433	1	chr7:19749415:19749458	0	3	3	0	NA	NA	NA	NA	NA	NA	NA	NA	NA	NA	NA	NA	NA	NA	NA	NA
220	STX11	NA	NA	NA	NA	NA	NA	NA	NA	NA	NA	NA	NA	NA	NA	NA	NA	-32.4167	2.21207	1	chr9:81550275:81550344	0	24	12	12
221	STX19	16.2792	-3.36125	1	chr1:38331423:38331429	6	13	13	0	NA	NA	NA	NA	NA	NA	NA	NA	NA	NA	NA	NA	NA	NA	NA	NA
222	TBC1D24	NA	NA	NA	NA	NA	NA	NA	NA	NA	NA	NA	NA	NA	NA	NA	NA	11.0759	-1.85743	7	chr25:1985116:1985208,chr25:1993800:1993873,chr25:1994670:1994707,chr25:1988307:1988336,chr25:1994801:1994861,chr25:1991305:1991316,chr25:1993308:1993329	10	154	142	12
223	TCIM	23.7847	-2.24021	3	chr27:35232234:35232321,chr27:35232169:35232255,chr27:35232590:35232679	0	11	11	0	32.0363	-2.24021	2	chr27:35233191:35233259,chr27:35232590:35232679	0	50	50	0	NA	NA	NA	NA	NA	NA	NA	NA
224	TECTB	NA	NA	NA	NA	NA	NA	NA	NA	NA	NA	NA	NA	NA	NA	NA	NA	11.1536	-3.71676	1	chr26:32816093:32816140	2	0	0	0
225	THBS2	NA	NA	NA	NA	NA	NA	NA	NA	NA	NA	NA	NA	NA	NA	NA	NA	10.9145	1.66861	1	chr9:103183289:103183323	8	13	13	0
226	TMC4	27.6063	-1.176	2	chr18:63227584:63227640,chr18:63226007:63226038	14	59	59	0	NA	NA	NA	NA	NA	NA	NA	NA	NA	NA	NA	NA	NA	NA	NA	NA
227	TMEM102	NA	NA	NA	NA	NA	NA	NA	NA	NA	NA	NA	NA	NA	NA	NA	NA	15.616	-2.50243	1	chr19:27112398:27112434	0	11	11	0
228	TMEM120B	NA	NA	NA	NA	NA	NA	NA	NA	NA	NA	NA	NA	NA	NA	NA	NA	18.111	-3.73392	3	chr17:53566533:53566579,chr17:53547919:53547992,chr17:53555016:53555040	0	106	105	1
229	TMEM125	26.1335	-3.14966	3	chr3:102757617:102757731,chr3:102757248:102757271,chr3:102757466:102757475	1	9	9	0	NA	NA	NA	NA	NA	NA	NA	NA	NA	NA	NA	NA	NA	NA	NA	NA
230	TMEM150B	-33.1315	1.51269	2	chr18:62159815:62159826,chr18:62159523:62159547	6	73	0	73	NA	NA	NA	NA	NA	NA	NA	NA	NA	NA	NA	NA	NA	NA	NA	NA
231	TMEM171	26.1001	-3.33483	1	chr20:8509306:8509385	0	15	15	0	NA	NA	NA	NA	NA	NA	NA	NA	NA	NA	NA	NA	NA	NA	NA	NA
232	TMEM95	29.1375	-1.24196	1	chr19:27053810:27053882	0	36	36	0	NA	NA	NA	NA	NA	NA	NA	NA	NA	NA	NA	NA	NA	NA	NA	NA
233	TNFAIP8L2	NA	NA	NA	NA	NA	NA	NA	NA	NA	NA	NA	NA	NA	NA	NA	NA	-36.4214	1.42629	4	chr3:19656072:19656166,chr3:19656444:19656518,chr3:19655919:19655983,chr3:19656315:19656329	10	22	0	22
234	TNFRSF1A	-17.9303	1.39098	4	chr5:104022101:104022154,chr5:104022879:104022931,chr5:104022209:104022232,chr5:104022914:104022967	15	26	1	25	NA	NA	NA	NA	NA	NA	NA	NA	NA	NA	NA	NA	NA	NA	NA	NA
235	TNFSF15	NA	NA	NA	NA	NA	NA	NA	NA	49.1401	1.68576	2	chr8:103988566:103988623,chr8:103988441:103988519	16	17	17	0	NA	NA	NA	NA	NA	NA	NA	NA
236	TSPAN32	NA	NA	NA	NA	NA	NA	NA	NA	NA	NA	NA	NA	NA	NA	NA	NA	-36.326	1.61891	1	chr29:49281592:49281642	5	21	0	21
237	TTC36	NA	NA	NA	NA	NA	NA	NA	NA	NA	NA	NA	NA	NA	NA	NA	NA	30.4694	-3.00899	1	chr15:29195069:29195150	4	8	8	0
238	TYROBP	-34.4391	1.18128	1	chr18:46595656:46595706	6	22	0	22	NA	NA	NA	NA	NA	NA	NA	NA	NA	NA	NA	NA	NA	NA	NA	NA
239	VILL	16.9999	-1.29563	1	chr22:11439016:11439055	0	1	1	0	27.1667	-1.29563	1	chr22:11441411:11441508	0	1	1	0	22.2606	-1.29563	1	chr22:11441411:11441508	0	6	6	0
240	VIPR1	NA	NA	NA	NA	NA	NA	NA	NA	NA	NA	NA	NA	NA	NA	NA	NA	14.3832	-4.0739	2	chr22:14660511:14660598,chr22:14660588:14660660	1	23	22	1
241	VSNL1	16.3727	-2.33386	1	chr11:81061888:81061917	0	14	14	0	NA	NA	NA	NA	NA	NA	NA	NA	NA	NA	NA	NA	NA	NA	NA	NA
242	ZC3H7B	NA	NA	NA	NA	NA	NA	NA	NA	NA	NA	NA	NA	NA	NA	NA	NA	11.692	-1.63968	7	chr5:112438523:112438581,chr5:112445501:112445552,chr5:112445501:112445595,chr5:112438912:112438986,chr5:112442347:112442406,chr5:112442539:112442555,chr5:112442233:112442260	13	66	62	4
243	ZNF750	36.096	-1.86296	1	chr19:49854967:49855018	0	50	50	0	NA	NA	NA	NA	NA	NA	NA	NA	NA	NA	NA	NA	NA	NA	NA	NA
