# Supplementary material for: Genome-Wide DNA Methylation and Transcriptome Integration Associates DNA Methylation Changes with Bovine Subclinical Mastitis Caused by Staphylococcus chromogenes
Source: Int J Mol Sci. 2023 Jun 20;24(12):10369. doi: 10.3390/ijms241210369 (PMC10299661; doi:10.3390/ijms241210369)
Supplement: Supplementary file 1 [file ijms-24-10369-s001.zip › TableS11 Functional enrichment for DMEGs.xlsx]

## Sheet: TableS11A_1486DMEGs
Table S11A Functional enrichment for differentially methylated and expressed genes (DMEGs)
	ONTOLOGY	ID	Description	GeneRatio	BgRatio	pvalue	p.adjust	qvalue	geneID	Count	Cluster
GO:0009605	BP	GO:0009605	response to external stimulus	65/247	449/3822	4.77633e-11	8.56873e-08	6.88797e-08	ACTA2/AIF1/BATF/C2/C3/C4BPA/CAPN3/CATHL3/CCL2/CCL3/CCR5/CFB/CLDN3/CLEC6A/CMKLR1/CSN1S2/CSN2/CXCL11/CXCL17/DEFB4A/DEFB7/DMTN/EDNRB/ENPP3/ESR1/FNDC4/FOLR3/FUT7/GATA3/GPR4/HSTN/IGF1/IL34/IL6/ISG15/LBP/LGALS1/LPO/LTF/LYST/MSTN/NFIB/NLRC4/NLRP3/NOD2/NR4A1/PDE2A/PF4/PGF/PTX3/RAB13/REEP6/RNASE6/S100A8/S100A9/SBNO2/SCN1B/SERPING1/SHMT2/TMEM102/TNFAIP8L2/TNFRSF1A/TREM1/TRIM56/TYROBP	65	cluster_1
GO:0002376	BP	GO:0002376	immune system process	64/247	448/3822	1.28775e-10	1.08207e-07	8.69817e-08	AIF1/B4GALT1/BATF/C2/C3/C4BPA/CCL2/CCL3/CD3D/CD3E/CD3G/CFB/CLEC6A/CTNNBIP1/CXCL11/CXCL17/DMTN/EDNRB/ENPP3/ESR1/FCER1G/FUT4/FUT7/GATA3/GPR68/HLX/IL12B/IL1B/IL2RA/IL34/IL6/ISG15/LBP/LGALS1/LPO/LTF/LYST/MMP14/MMP9/MSTN/NLRC4/NLRP3/NOD2/NRROS/PF4/PIGR/PLA2G3/PTGDS/PTX3/S100A8/S100A9/S100B/SBNO2/SELL/SELP/SEMA4A/SERPING1/SHMT2/TCIM/TMEM102/TNFAIP8L2/TREM1/TRIM56/TYROBP	64	cluster_1
GO:0006952	BP	GO:0006952	defense response	48/247	286/3822	1.80947e-10	1.08207e-07	8.69817e-08	AIF1/B4GALT1/BATF/C2/C3/C4BPA/CATHL3/CCL3/CCRL2/CFB/CLEC6A/CSN1S2/CSN2/CTNNBIP1/CXCL17/ENPP3/ESR1/FNDC4/FUT7/GATA3/GPR4/HSTN/IL1B/IL34/IL6/ISG15/LBP/LGALS1/LPO/LTF/LYST/NLRC4/NLRP3/NOD2/NOS2/NRROS/PDE2A/PTX3/RNASE6/S100A8/S100A9/S100B/SHMT2/TNFAIP8L2/TNFRSF1A/TREM1/TRIM56/TYROBP	48	cluster_1
GO:0006955	BP	GO:0006955	immune response	46/247	289/3822	2.87338e-09	1.03097e-06	8.28744e-07	AIF1/BATF/C2/C3/C4BPA/CCL3/CD3D/CD3E/CD3G/CFB/CLEC6A/ENPP3/ESR1/FCER1G/FUT7/GATA3/HLX/IL12B/IL1B/IL34/IL6/ISG15/LBP/LGALS1/LPO/LTF/LYST/NLRC4/NLRP3/NOD2/NRROS/PIGR/PLA2G3/PTGDS/PTX3/S100A8/S100A9/S100B/SEMA4A/SERPING1/SHMT2/TCIM/TNFAIP8L2/TREM1/TRIM56/TYROBP	46	cluster_1
GO:0050900	BP	GO:0050900	leukocyte migration	20/247	70/3822	6.62648e-09	1.98132e-06	1.59268e-06	AIF1/B4GALT1/CCL2/CCL3/CXCL11/CXCL17/EDNRB/FUT4/FUT7/GATA3/IL34/MMP9/MSTN/NOD2/PF4/S100A8/S100A9/SELL/SELP/TMEM102	20	cluster_2
GO:0002684	BP	GO:0002684	positive regulation of immune system process	29/247	141/3822	1.07752e-08	2.76154e-06	2.21986e-06	AIF1/C2/C3/C4BPA/CCL3/CFB/CLEC6A/CTNNBIP1/CXCL17/ENPP3/FUT4/FUT7/GATA3/GPR68/HLX/IL12B/IL1B/IL34/IL6/LGALS1/MMP14/MSTN/NLRC4/NLRP3/NOD2/S100B/SERPING1/TMEM102/TYROBP	29	cluster_1
GO:0009888	BP	GO:0009888	tissue development	41/247	273/3822	1.32946e-07	2.9813e-05	2.39652e-05	ACTA2/AGT/B4GALT1/C15H11orf34/C3/CHRND/CLDN3/CLEC3B/CNFN/CTNNBIP1/EDNRB/EHF/ESR1/GATA3/GPR4/HLX/IL6/IRF6/ISG15/KRT10/LTF/MGP/MMP14/MMP9/MSTN/NFIB/NR2F2/NR4A1/OVOL1/PDE2A/PGK1/RAB13/RAB25/RHOC/RILPL2/SBNO2/SFN/SLC39A14/SLC44A4/SPP1/ZNF750	41	cluster_1
GO:0032101	BP	GO:0032101	regulation of response to external stimulus	30/247	169/3822	2.015e-07	3.33414e-05	2.68015e-05	AIF1/C3/CAPN3/CCL2/CCL3/CLDN3/CSN2/CXCL17/DMTN/ENPP3/ESR1/FNDC4/FUT7/GATA3/GPR4/IL34/IL6/ISG15/LGALS1/LTF/MSTN/NLRC4/NOD2/PDE2A/S100A8/S100A9/SERPING1/TMEM102/TNFRSF1A/TYROBP	30	cluster_1
GO:0006935	BP	GO:0006935	chemotaxis	21/247	92/3822	2.04435e-07	3.33414e-05	2.68015e-05	AIF1/CCL2/CCL3/CMKLR1/CXCL11/CXCL17/DEFB4A/DEFB7/EDNRB/IL34/MSTN/NFIB/NOD2/NR4A1/PF4/PGF/RAB13/S100A8/S100A9/SCN1B/TMEM102	21	cluster_2
GO:0042330	BP	GO:0042330	taxis	21/247	92/3822	2.04435e-07	3.33414e-05	2.68015e-05	AIF1/CCL2/CCL3/CMKLR1/CXCL11/CXCL17/DEFB4A/DEFB7/EDNRB/IL34/MSTN/NFIB/NOD2/NR4A1/PF4/PGF/RAB13/S100A8/S100A9/SCN1B/TMEM102	21	cluster_2
GO:0040011	BP	GO:0040011	locomotion	40/247	268/3822	2.30687e-07	3.44877e-05	2.77229e-05	AGT/AIF1/B4GALT1/C15H11orf34/CCL2/CCL3/CFAP206/CLDN3/CMKLR1/CXCL11/CXCL17/DEFB4A/DEFB7/DMTN/EDNRB/FERMT3/FGFBP1/FUT4/FUT7/GATA3/GRB7/IL34/MMP14/MMP9/MSTN/NFIB/NOD2/NR2F2/NR4A1/PF4/PGF/RAB13/RAB25/RHOC/S100A8/S100A9/SCN1B/SELL/SELP/TMEM102	40	cluster_2
GO:0051239	BP	GO:0051239	regulation of multicellular organismal process	52/247	404/3822	3.97212e-07	5.48153e-05	4.40632e-05	AGT/AIF1/BATF/C3/CAPN3/CCL3/CLEC6A/CMKLR1/CSN2/CTNNBIP1/CXCL17/DIO2/DMTN/EDNRB/ESR1/FCER1G/FGFBP1/GATA3/GPR4/GPR68/HLX/IL12B/IL1B/IL34/IL6/ISG15/LBP/LTF/MGP/MMP14/MMP9/NFIB/NLRC4/NLRP3/NOD2/NOS2/NR2F2/PF4/PGK1/PTGDS/RAB25/S100B/SCN1B/SEMA4A/SERPING1/SFN/SLC8A1/TCIM/THBS2/TNNT2/TRIM56/ZNF750	52	cluster_1
GO:0050727	BP	GO:0050727	regulation of inflammatory response	17/247	66/3822	4.96938e-07	6.19639e-05	4.98096e-05	C3/CCL3/CSN2/CXCL17/ENPP3/ESR1/FNDC4/FUT7/GATA3/GPR4/IL6/LGALS1/NOD2/PDE2A/S100A8/S100A9/TNFRSF1A	17	cluster_1
GO:0060326	BP	GO:0060326	cell chemotaxis	15/247	54/3822	8.33308e-07	8.79385e-05	7.06892e-05	AIF1/CCL2/CCL3/CXCL11/CXCL17/EDNRB/IL34/MSTN/NOD2/NR4A1/PF4/RAB13/S100A8/S100A9/TMEM102	15	cluster_2
GO:0030335	BP	GO:0030335	positive regulation of cell migration	19/247	86/3822	1.36532e-06	0.000128915	0.000103628	AGT/AIF1/C15H11orf34/CCL3/CLDN3/CXCL17/DMTN/FERMT3/FGFBP1/FUT4/FUT7/GATA3/GRB7/IL34/MMP9/MSTN/RAB25/RHOC/TMEM102	19	cluster_2
GO:0007159	BP	GO:0007159	leukocyte cell-cell adhesion	15/247	60/3822	3.60035e-06	0.000269126	0.000216337	AIF1/FERMT3/FUT4/FUT7/GATA3/HLX/IL12B/IL6/LGALS1/NLRP3/NOD2/S100A8/S100A9/SELL/SELP	15	cluster_3
GO:0040017	BP	GO:0040017	positive regulation of locomotion	19/247	93/3822	4.75915e-06	0.000328381	0.000263969	AGT/AIF1/C15H11orf34/CCL3/CLDN3/CXCL17/DMTN/FERMT3/FGFBP1/FUT4/FUT7/GATA3/GRB7/IL34/MMP9/MSTN/RAB25/RHOC/TMEM102	19	cluster_2
GO:0002064	BP	GO:0002064	epithelial cell development	11/247	34/3822	4.9746e-06	0.000330535	0.0002657	ACTA2/B4GALT1/CLDN3/EDNRB/ESR1/GPR4/PDE2A/RAB13/RAB25/RILPL2/SFN	11	cluster_4
GO:0043207	BP	GO:0043207	response to external biotic stimulus	35/247	252/3822	7.94197e-06	0.00046515	0.00037391	ACTA2/AIF1/BATF/C2/C3/C4BPA/CATHL3/CCL2/CCL3/CCR5/CFB/CLEC6A/CSN1S2/GATA3/HSTN/IL34/IL6/ISG15/LBP/LPO/LTF/LYST/NLRC4/NLRP3/NOD2/PTX3/RNASE6/S100A8/S100A9/SBNO2/SHMT2/TNFAIP8L2/TREM1/TRIM56/TYROBP	35	cluster_5
GO:0051707	BP	GO:0051707	response to other organism	35/247	252/3822	7.94197e-06	0.00046515	0.00037391	ACTA2/AIF1/BATF/C2/C3/C4BPA/CATHL3/CCL2/CCL3/CCR5/CFB/CLEC6A/CSN1S2/GATA3/HSTN/IL34/IL6/ISG15/LBP/LPO/LTF/LYST/NLRC4/NLRP3/NOD2/PTX3/RNASE6/S100A8/S100A9/SBNO2/SHMT2/TNFAIP8L2/TREM1/TRIM56/TYROBP	35	cluster_5
GO:0098542	BP	GO:0098542	defense response to other organism	30/247	200/3822	8.03771e-06	0.00046515	0.00037391	AIF1/BATF/C2/C3/C4BPA/CATHL3/CFB/CLEC6A/CSN1S2/GATA3/HSTN/IL34/IL6/ISG15/LBP/LPO/LTF/LYST/NLRC4/NLRP3/NOD2/PTX3/RNASE6/S100A8/S100A9/SHMT2/TNFAIP8L2/TREM1/TRIM56/TYROBP	30	cluster_5
GO:0044419	BP	GO:0044419	biological process involved in interspecies interaction between organisms	38/247	285/3822	8.35312e-06	0.000468297	0.00037644	ACE2/ACTA2/AIF1/BATF/C2/C3/C4BPA/CATHL3/CCL2/CCL3/CCR5/CFB/CLEC6A/CSN1S2/GATA3/HSTN/IL34/IL6/ISG15/LBP/LGALS1/LPO/LTF/LYST/NLRC4/NLRP3/NOD2/PTGDS/PTX3/RNASE6/S100A8/S100A9/SBNO2/SHMT2/TNFAIP8L2/TREM1/TRIM56/TYROBP	38	cluster_5
GO:0051674	BP	GO:0051674	localization of cell	34/247	245/3822	1.10748e-05	0.00056766	0.000456313	AGT/AIF1/B4GALT1/C15H11orf34/CCL2/CCL3/CFAP206/CLDN3/CXCL11/CXCL17/DMTN/EDNRB/FERMT3/FGFBP1/FUT4/FUT7/GATA3/GRB7/IL34/MMP14/MMP9/MSTN/NOD2/NR2F2/NR4A1/PF4/RAB13/RAB25/RHOC/S100A8/S100A9/SELL/SELP/TMEM102	34	cluster_2
GO:0032355	BP	GO:0032355	response to estradiol	6/247	10/3822	1.15679e-05	0.000576469	0.000463394	CSN1S1/CSN1S2/CSN2/CSN3/ESR1/LALBA	6	cluster_4
GO:0009607	BP	GO:0009607	response to biotic stimulus	35/247	260/3822	1.60966e-05	0.000780468	0.000627378	ACTA2/AIF1/BATF/C2/C3/C4BPA/CATHL3/CCL2/CCL3/CCR5/CFB/CLEC6A/CSN1S2/GATA3/HSTN/IL34/IL6/ISG15/LBP/LPO/LTF/LYST/NLRC4/NLRP3/NOD2/PTX3/RNASE6/S100A8/S100A9/SBNO2/SHMT2/TNFAIP8L2/TREM1/TRIM56/TYROBP	35	cluster_5
GO:0031960	BP	GO:0031960	response to corticosteroid	7/247	15/3822	1.77959e-05	0.000818611	0.00065804	CSN1S1/CSN1S2/CSN2/CSN3/IL6/LALBA/MSTN	7	cluster_4
GO:0022409	BP	GO:0022409	positive regulation of cell-cell adhesion	12/247	47/3822	2.77928e-05	0.00108392	0.000871306	AIF1/DMTN/FUT4/FUT7/GATA3/HLX/IL12B/IL6/LGALS1/NLRP3/NOD2/SELP	12	cluster_3
GO:0001816	BP	GO:0001816	cytokine production	22/247	135/3822	3.87023e-05	0.0014465	0.00116277	AIF1/BATF/C3/CCL3/CLEC6A/CMKLR1/CXCL17/FCER1G/GATA3/IL12B/IL1B/IL6/ISG15/LBP/LTF/NLRC4/NLRP3/NOD2/NOS2/NRROS/S100B/TRIM56	22	cluster_1
GO:0042127	BP	GO:0042127	regulation of cell population proliferation	30/247	218/3822	4.52077e-05	0.00156348	0.0012568	AIF1/AVPR2/B4GALT1/CCL2/CLDN3/CNN1/CTNNBIP1/CXCL11/ENPP3/ESR1/FGFBP1/GATA3/HLX/IGF1/IL12B/IL34/IL6/IRF6/LTF/MMP9/MSTN/NFIB/NOD2/NR2F2/NR4A1/OVOL1/PF4/PGF/RAB25/SFN	30	cluster_1
GO:0006928	BP	GO:0006928	movement of cell or subcellular component	36/247	287/3822	5.78869e-05	0.00192313	0.00154591	AGT/AIF1/B4GALT1/C15H11orf34/CCL2/CCL3/CFAP206/CLDN3/CXCL11/CXCL17/DMTN/EDNRB/FERMT3/FGFBP1/FUT4/FUT7/GATA3/GRB7/IL34/MMP14/MMP9/MSTN/NFIB/NOD2/NR2F2/NR4A1/PF4/RAB13/RAB25/RHOC/S100A8/S100A9/SCN1B/SELL/SELP/TMEM102	36	cluster_2
GO:0001819	BP	GO:0001819	positive regulation of cytokine production	18/247	101/3822	6.02653e-05	0.00196574	0.00158016	AIF1/BATF/C3/CCL3/CLEC6A/CXCL17/FCER1G/GATA3/IL12B/IL1B/IL6/ISG15/LBP/NLRC4/NLRP3/NOD2/NOS2/TRIM56	18	cluster_1
GO:0007186	BP	GO:0007186	G protein-coupled receptor signaling pathway	19/247	112/3822	7.58665e-05	0.00216039	0.00173663	ADGRL2/AGRP/AGT/C3/CCR5/CCRL2/CMKLR1/CXCL11/CXCR1/EDNRB/ESR1/F2RL2/GPR158/GPR4/GPR68/LPAR5/LTB4R/PF4/SLC39A14	19	cluster_4
GO:0042060	BP	GO:0042060	wound healing	14/247	68/3822	8.07597e-05	0.00222897	0.00179175	B4GALT1/C15H11orf34/CELA2A/CLDN3/DMTN/F11/F2RL2/FERMT3/GPR4/IL6/PF4/PLA2G4A/RHOC/SERPING1	14	cluster_4
GO:0010033	BP	GO:0010033	response to organic substance	50/247	462/3822	0.000103346	0.00276719	0.00222441	AGRP/AGT/AIF1/ALDH1A1/AVPR2/CCL2/CCL3/CCR5/CCRL2/CELA2A/CITED4/CSN1S1/CSN1S2/CSN2/CSN3/CXCR1/DMTN/EDNRB/ESR1/FCER1G/FNDC4/FOLR3/FUT7/GATA3/GPR68/IGF1/IL2RA/IL34/IL6/ISG15/KRT19/LALBA/LBP/LTF/MMP9/MSTN/NOD2/NR4A1/NRROS/PDE2A/PF4/RAB13/RDH12/SBNO2/SCNN1A/SHMT2/SLC39A14/TMEM102/TNFRSF1A/TRIM56	50	cluster_4
GO:0010817	BP	GO:0010817	regulation of hormone levels	14/247	70/3822	0.000112662	0.00297228	0.00238926	ALDH1A1/CELA2A/CPQ/CRABP1/DHRS11/DIO2/EDNRB/ESR1/GATA3/GPR68/IL6/PNPLA2/RDH12/SLC39A14	14	cluster_4
GO:0001775	BP	GO:0001775	cell activation	24/247	167/3822	0.000138369	0.00349625	0.00281046	AIF1/BATF/CAPN3/CCL3/CELA2A/DMTN/ENPP3/FERMT3/FUT7/GATA3/HLX/IL12B/IL6/LBP/LGALS1/MMP14/NLRP3/NOD2/PF4/PLA2G3/PLA2G4A/PTGDS/S100B/TCIM	24	cluster_1
GO:0002263	BP	GO:0002263	cell activation involved in immune response	12/247	55/3822	0.000146498	0.00365024	0.00293424	BATF/CCL3/ENPP3/HLX/IL12B/IL6/LBP/LGALS1/NLRP3/PLA2G3/PTGDS/TCIM	12	cluster_1
GO:0009653	BP	GO:0009653	anatomical structure morphogenesis	43/247	387/3822	0.000191353	0.00463901	0.00372907	ACTA2/AGT/ANGPTL4/ATP6V1B1/B4GALT1/C15H11orf34/C3/CAPN3/CCL2/CCL3/CD53/CLDN3/CTNNBIP1/CXCL17/DMTN/ESR1/FERMT3/FGFBP1/GATA3/GPR4/HLX/IL6/KRT19/LTF/MFGE8/MMP14/MMP9/NFIB/NR2F2/NR4A1/PF4/PGK1/RAB25/RHOC/RILPL2/RP1/S100B/SBNO2/SCN1B/SEMA4A/SLC44A4/THBS2/TIE1	43	cluster_1
GO:0009719	BP	GO:0009719	response to endogenous stimulus	27/247	208/3822	0.000301362	0.00675804	0.00543245	AGRP/CCL2/CELA2A/CITED4/CSN1S1/CSN1S2/CSN2/CSN3/DMTN/ESR1/FCER1G/FNDC4/FOLR3/FUT7/GATA3/IGF1/IL6/KRT19/LALBA/MSTN/NOD2/NR4A1/NRROS/PDE2A/RAB13/SCNN1A/SLC39A14	27	cluster_4
GO:0035850	BP	GO:0035850	epithelial cell differentiation involved in kidney development	5/247	11/3822	0.000362397	0.00756371	0.00608008	ACTA2/EDNRB/GATA3/GPR4/MMP9	5	cluster_4
GO:0006956	BP	GO:0006956	complement activation	6/247	17/3822	0.000463083	0.0092308	0.00742017	C2/C3/C4BPA/CFB/S100B/SERPING1	6	cluster_4
GO:0002521	BP	GO:0002521	leukocyte differentiation	15/247	89/3822	0.000471636	0.00929796	0.00747416	BATF/CCL3/CTNNBIP1/FUT7/GATA3/GPR68/HLX/IL12B/IL6/LGALS1/LTF/MMP14/NLRP3/NRROS/SBNO2	15	cluster_1
GO:0050867	BP	GO:0050867	positive regulation of cell activation	11/247	54/3822	0.000522243	0.00986215	0.00792768	AIF1/CAPN3/GATA3/HLX/IL12B/IL6/LGALS1/MMP14/NLRP3/NOD2/PLA2G4A	11	cluster_3
GO:1901652	BP	GO:1901652	response to peptide	11/247	54/3822	0.000522243	0.00986215	0.00792768	CELA2A/CSN1S1/CSN1S2/FUT7/IGF1/MMP9/MSTN/NOD2/NR4A1/RAB13/SLC39A14	11	cluster_4
GO:0042093	BP	GO:0042093	T-helper cell differentiation	5/247	12/3822	0.000588708	0.010777	0.00866306	BATF/HLX/IL12B/IL6/NLRP3	5	cluster_3
GO:0010951	BP	GO:0010951	negative regulation of endopeptidase activity	9/247	39/3822	0.000647699	0.0116779	0.00938728	A2M/AGT/C3/CSN2/LOC404103/LTF/MMP9/NR4A1/SFN	9	cluster_4
GO:0050878	BP	GO:0050878	regulation of body fluid levels	13/247	73/3822	0.000654067	0.0116779	0.00938728	ATP6V1B1/CELA2A/CSN2/DMTN/F11/F2RL2/FERMT3/IL6/PF4/PLA2G4A/SCNN1A/SERPING1/SFN	13	cluster_4
GO:0035239	BP	GO:0035239	tube morphogenesis	20/247	143/3822	0.000725144	0.012754	0.0102523	AGT/ANGPTL4/B4GALT1/C3/CTNNBIP1/CXCL17/ESR1/FGFBP1/GATA3/GPR4/HLX/MFGE8/MMP14/NR2F2/NR4A1/PF4/PGK1/SEMA4A/THBS2/TIE1	20	cluster_1
GO:0050793	BP	GO:0050793	regulation of developmental process	37/247	340/3822	0.000852364	0.0146999	0.0118165	AGT/C3/CAPN3/CCL2/CCL3/CD53/CLDN3/CMKLR1/CSN2/CTNNBIP1/DMTN/EDNRB/ESR1/GATA3/GPR4/GPR68/HLX/IL34/IL6/ISG15/KRT10/LTF/MGP/MMP14/MMP9/MSR1/MSTN/NFIB/NLRP3/PF4/PGK1/PLA2G3/SEMA4A/SFN/TCIM/THBS2/ZNF750	37	cluster_1
GO:0002287	BP	GO:0002287	alpha-beta T cell activation involved in immune response	5/247	13/3822	0.000906614	0.0146999	0.0118165	BATF/HLX/IL12B/IL6/NLRP3	5	cluster_3
GO:0030168	BP	GO:0030168	platelet activation	6/247	19/3822	0.000909527	0.0146999	0.0118165	CELA2A/DMTN/FERMT3/IL6/PF4/PLA2G4A	6	cluster_4
GO:0050920	BP	GO:0050920	regulation of chemotaxis	8/247	34/3822	0.00113058	0.0173183	0.0139213	AIF1/CCL2/CCL3/CXCL17/IL34/MSTN/NOD2/TMEM102	8	cluster_2
GO:0050817	BP	GO:0050817	coagulation	9/247	43/3822	0.0013725	0.0195677	0.0157295	CELA2A/DMTN/F11/F2RL2/FERMT3/IL6/PF4/PLA2G4A/SERPING1	9	cluster_4
GO:0016051	BP	GO:0016051	carbohydrate biosynthetic process	8/247	35/3822	0.00138523	0.0195677	0.0157295	B4GALT1/FBP2/GPD1/IGF1/ISYNA1/LALBA/SDS/SLC39A14	8	cluster_4
GO:0050870	BP	GO:0050870	positive regulation of T cell activation	8/247	35/3822	0.00138523	0.0195677	0.0157295	AIF1/GATA3/HLX/IL12B/IL6/LGALS1/NLRP3/NOD2	8	cluster_3
GO:2000026	BP	GO:2000026	regulation of multicellular organismal development	23/247	184/3822	0.00144699	0.0202804	0.0163024	C3/CAPN3/CCL3/CSN2/CTNNBIP1/GATA3/GPR4/GPR68/HLX/IL34/IL6/ISG15/LTF/MGP/MMP14/MMP9/NLRP3/PF4/PGK1/SEMA4A/SFN/TCIM/THBS2	23	cluster_1
GO:0051346	BP	GO:0051346	negative regulation of hydrolase activity	11/247	61/3822	0.00152341	0.0211861	0.0170304	A2M/AGT/ANGPTL4/C3/CSN2/LOC404103/LTF/MMP9/NR4A1/SFN/SLC39A14	11	cluster_4
GO:0008283	BP	GO:0008283	cell population proliferation	31/247	278/3822	0.00155705	0.0214873	0.0172726	AIF1/AVPR2/B4GALT1/CCL2/CLDN3/CNN1/CTNNBIP1/CXCL11/EHF/ENPP3/ESR1/FGFBP1/GATA3/HLX/IGF1/IL12B/IL34/IL6/IRF6/LTF/MMP9/MSTN/NFIB/NOD2/NR2F2/NR4A1/OVOL1/PF4/PGF/RAB25/SFN	31	cluster_1
GO:0035710	BP	GO:0035710	CD4-positive, alpha-beta T cell activation	6/247	21/3822	0.0016301	0.0218239	0.0175431	BATF/FUT7/HLX/IL12B/IL6/NLRP3	6	cluster_3
GO:0042886	BP	GO:0042886	amide transport	8/247	37/3822	0.00203028	0.0262038	0.0210639	ABCG2/CELA2A/FOLR3/GPR68/IL6/S100A8/SLC14A1/SLC46A1	8	cluster_4
GO:0071222	BP	GO:0071222	cellular response to lipopolysaccharide	8/247	37/3822	0.00203028	0.0262038	0.0210639	CCL2/CCL3/CCR5/IL6/LBP/LTF/NOD2/SBNO2	8	cluster_4
GO:0009636	BP	GO:0009636	response to toxic substance	9/247	47/3822	0.00264245	0.0311878	0.0250703	ALDH1A1/ALOX5AP/CCL3/CSN1S1/CSN2/LPO/RDH12/S100A8/S100A9	9	cluster_4
GO:0032879	BP	GO:0032879	regulation of localization	42/247	427/3822	0.00287603	0.0330531	0.0265697	AGT/AIF1/C15H11orf34/C3/CAPN3/CCL2/CCL3/CCR5/CELA2A/CFAP206/CLDN3/CRYAB/CSN2/CXCL11/CXCL17/DMTN/FERMT3/FGFBP1/FUT4/FUT7/GATA3/GOLPH3L/GPR68/GRB7/IGF1/IL34/IL6/MMP9/MSR1/MSTN/NOD2/NR2F2/PLA2G3/PNPLA2/RAB25/RHOC/S100A8/SCN1B/SELP/SFN/SLC8A1/TMEM102	42	cluster_2
GO:0003008	BP	GO:0003008	system process	25/247	217/3822	0.00288073	0.0330531	0.0265697	ABCG2/ACTA2/AGT/ATP6V1B1/CCL2/CCL3/CHRND/CNGA1/CSN2/CTNNBIP1/EDNRB/GPR4/GUCY2D/NCALD/NOD2/PDE2A/RDH12/REEP6/RHPN2/RP1/S100B/SCN1B/SCNN1A/SLC8A1/TNNT2	25	cluster_4
GO:0051251	BP	GO:0051251	positive regulation of lymphocyte activation	9/247	48/3822	0.00307295	0.0344555	0.027697	AIF1/GATA3/HLX/IL12B/IL6/LGALS1/MMP14/NLRP3/NOD2	9	cluster_3
GO:0009069	BP	GO:0009069	serine family amino acid metabolic process	4/247	11/3822	0.00391167	0.0427899	0.0343966	CTH/GCAT/SDS/SHMT2	4	cluster_4
GO:0045597	BP	GO:0045597	positive regulation of cell differentiation	15/247	111/3822	0.00465083	0.0476444	0.0382989	CMKLR1/CTNNBIP1/DMTN/GATA3/GPR68/HLX/IL34/IL6/ISG15/LTF/MMP14/MSR1/NLRP3/PLA2G3/SFN	15	cluster_1
GO:0097237	BP	GO:0097237	cellular response to toxic substance	8/247	42/3822	0.00468739	0.0476444	0.0382989	ALDH1A1/ALOX5AP/CSN1S1/CSN2/LPO/RDH12/S100A8/S100A9	8	cluster_4
GO:1990748	BP	GO:1990748	cellular detoxification	8/247	42/3822	0.00468739	0.0476444	0.0382989	ALDH1A1/ALOX5AP/CSN1S1/CSN2/LPO/RDH12/S100A8/S100A9	8	cluster_4
GO:0052548	BP	GO:0052548	regulation of endopeptidase activity	11/247	70/3822	0.0047007	0.0476444	0.0382989	A2M/AGT/C3/CSN2/LOC404103/LTF/MMP9/NR4A1/S100A8/S100A9/SFN	11	cluster_4
GO:0048018	MF	GO:0048018	receptor ligand activity	17/222	74/3346	3.89481e-06	0.000618752	0.000546424	AGRP/CCL3/CXCL11/GMFG/GPI/IGF1/IL12B/IL1B/IL1RN/IL34/LHB/MSTN/OGN/PGF/RETN/SPADH1/SPP1	17
GO:0030546	MF	GO:0030546	signaling receptor activator activity	17/222	75/3346	4.74266e-06	0.000618752	0.000546424	AGRP/CCL3/CXCL11/GMFG/GPI/IGF1/IL12B/IL1B/IL1RN/IL34/LHB/MSTN/OGN/PGF/RETN/SPADH1/SPP1	17
GO:0030545	MF	GO:0030545	signaling receptor regulator activity	17/222	77/3346	6.95227e-06	0.000618752	0.000546424	AGRP/CCL3/CXCL11/GMFG/GPI/IGF1/IL12B/IL1B/IL1RN/IL34/LHB/MSTN/OGN/PGF/RETN/SPADH1/SPP1	17
GO:0038023	MF	GO:0038023	signaling receptor activity	19/222	108/3346	6.219e-05	0.00332095	0.00293275	ADCYAP1R1/ADGRL2/CCR5/CHRND/CLEC6A/CMKLR1/CXCR1/EDNRB/ESR1/F2RL2/GPR158/GPR4/GPR68/LPAR5/NOD2/NR2F2/NR4A1/TNFRSF1A/TREM1	19
GO:0060089	MF	GO:0060089	molecular transducer activity	19/222	108/3346	6.219e-05	0.00332095	0.00293275	ADCYAP1R1/ADGRL2/CCR5/CHRND/CLEC6A/CMKLR1/CXCR1/EDNRB/ESR1/F2RL2/GPR158/GPR4/GPR68/LPAR5/NOD2/NR2F2/NR4A1/TNFRSF1A/TREM1	19
GO:0005102	MF	GO:0005102	signaling receptor binding	27/222	197/3346	0.000175577	0.00781317	0.00689986	AGRP/AGT/C3/CCL3/CCRL2/CXCL11/DMTN/FERMT3/GMFG/GPI/IGF1/IL12B/IL1B/IL1RN/IL34/IL6/ISG15/LHB/LTF/MSTN/OGN/PF4/PGF/RETN/S100A8/SPADH1/SPP1	27
GO:0005539	MF	GO:0005539	glycosaminoglycan binding	11/222	48/3346	0.000216545	0.00825965	0.00729415	CLEC3B/CXCL11/F11/HAPLN1/LOC504773/LTF/MSTN/NOD2/PF4/THBS2/TMEM184A	11
GO:0031406	MF	GO:0031406	carboxylic acid binding	8/222	29/3346	0.000420132	0.0112175	0.00990628	ALOX5AP/CRABP1/FOLR3/NR2F2/PAEP/S100A8/SLC46A1/TM4SF5	8
GO:0043177	MF	GO:0043177	organic acid binding	7/222	24/3346	0.000672505	0.0149632	0.0132141	ALOX5AP/CRABP1/FOLR3/NR2F2/S100A8/SLC46A1/TM4SF5	7
GO:0004930	MF	GO:0004930	G protein-coupled receptor activity	10/222	47/3346	0.000790845	0.0162427	0.0143441	ADCYAP1R1/ADGRL2/CCR5/CXCR1/EDNRB/F2RL2/GPR158/GPR4/GPR68/LPAR5	10
GO:0005509	MF	GO:0005509	calcium ion binding	17/222	121/3346	0.00223175	0.0425627	0.0375874	CAPN3/CLEC3B/CLEC6A/EFHD1/ENPP3/LALBA/LPO/MGP/NCALD/PLA2G4A/S100A9/S100B/SELL/SELP/SLC8A1/THBS2/VSNL1	17
GO:0005501	MF	GO:0005501	retinoid binding	4/222	10/3346	0.00288137	0.0460494	0.0406666	CRABP1/NR2F2/PAEP/PTGDS	4
GO:0019840	MF	GO:0019840	isoprenoid binding	4/222	10/3346	0.00288137	0.0460494	0.0406666	CRABP1/NR2F2/PAEP/PTGDS	4
GO:0005576	CC	GO:0005576	extracellular region	68/244	333/4051	2.66265e-21	6.33711e-19	5.96994e-19	AGRP/AGT/B4GALT1/BRB/C2/CATHL3/CCL3/CELA2A/CFB/CLEC3B/CPQ/CRYAB/CSN1S1/CSN1S2/CSN2/CSN3/CXCL17/DHRS11/ECM2/ELN/ENPP3/ENPP6/F11/F5/FGFBP1/FGG/FNDC4/FOLR3/GPI/HAPLN1/HSTN/IGF1/IL12B/IL1B/IL34/IL6/ISG15/LALBA/LBP/LHB/LPO/LTF/MFGE8/MGP/MMP9/MSR1/MUC15/NLRP3/NRROS/OGN/OLFML3/PGA5/PGK1/PIGR/PLA2G3/PLAU/PRELP/PRSS23/PTGDS/PTX3/RETN/S100A9/SCNN1A/SFN/SPADH1/SPP1/THBS2/XDH	68
GO:0098590	CC	GO:0098590	plasma membrane region	27/244	210/4051	0.00011113	0.00881628	0.00830547	ABCG2/ACE2/AIF1/ATP6V1B1/B4GALT1/C15H11orf34/CASZ1/CHRND/CLDN3/CLDN7/DMTN/ENPP3/FOLR3/KRT19/MXRA8/NEU3/NOD2/PDE2A/RAB25/RHBG/RHOC/SCNN1A/SLC14A1/SLC39A14/SLC44A4/SLC46A1/SLC8A1	27
GO:0031226	CC	GO:0031226	intrinsic component of plasma membrane	17/244	109/4051	0.000225672	0.0134275	0.0126495	CCRL2/CHRND/FCER1G/FOLR3/NCF1/NCF2/NOD2/RHBG/SCN1B/SCNN1A/SELL/SELP/SLC14A1/SLC39A14/SLC8A1/TMEM150B/TYROBP	17
bta04060	KEGG	bta04060	Cytokine-cytokine receptor interaction	44/479	201/6119	1.63522e-10	4.8239e-08	4.45812e-08	ACVR2B/CCL16/CCL2/CCL26/CCL28/CCL3/CCR5/CCR9/CSF1R/CSF2RB/CXCL11/CXCL13/CXCL17/CXCR1/CXCR2/EBI3/GDF11/IL12B/IL18RAP/IL1B/IL1RL1/IL1RN/IL2RA/IL2RB/IL33/IL34/IL3RA/IL6/LOC100139916/LOC508666/LOC529196/MPL/MSTN/PF4/PPBP/RELT/TNFRSF11A/TNFRSF1A/TNFRSF9/TNFSF15/TNFSF18/TNFSF4/XCL1/XCL2	44
bta04610	KEGG	bta04610	Complement and coagulation cascades	20/479	57/6119	3.98588e-09	5.32787e-07	4.92389e-07	A2M/C2/C3/C4BPA/C5AR1/CD55/CFB/F11/F2RL2/F5/FGG/ITGAM/ITGAX/LOC281376/MASP1/PLAU/SERPINA1/SERPINE1/SERPING1/VSIG4	20
bta04061	KEGG	bta04061	Viral protein interaction with cytokine and cytokine receptor	24/479	81/6119	5.41818e-09	5.32787e-07	4.92389e-07	CCL16/CCL2/CCL26/CCL28/CCL3/CCR5/CCR9/CSF1R/CXCL11/CXCL13/CXCR1/CXCR2/IL18RAP/IL2RA/IL2RB/IL34/IL6/LOC508666/LOC529196/PF4/PPBP/TNFRSF1A/XCL1/XCL2	24
bta05150	KEGG	bta05150	Staphylococcus aureus infection	18/479	64/6119	1.0761e-06	7.93621e-05	7.33445e-05	BOLA-DQA2/C2/C3/C5AR1/CATHL3/CFB/FCGR1A/FCGR2A/FCGR3A/FGG/ITGAM/KRT10/KRT14/KRT15/KRT19/LOC509513/MASP1/SELP	18
bta05332	KEGG	bta05332	Graft-versus-host disease	16/479	54/6119	2.00441e-06	0.00011826	0.000109293	BOLA-DQA2/CD80/IL1B/IL6/KIR2DL5A/KIR3DL2/KIR3DS1/KLRC1/LOC100140174/LOC100336869/LOC100847738/LOC100852061/LOC112446743/LOC509513/LOC614781/LOC618565	16
bta04380	KEGG	bta04380	Osteoclast differentiation	24/479	119/6119	1.212e-05	0.000595899	0.000550715	BTK/CSF1R/FCGR1A/FCGR2A/FCGR3A/IL1B/LOC100139209/LOC101907857/LOC104973826/LOC107131323/LOC112441494/LOC510520/LOC536097/LOC790255/MAPK13/NCF1/NCF2/NCF4/SIRPB1/SPI1/SYK/TNFRSF11A/TNFRSF1A/TYROBP	24
bta04650	KEGG	bta04650	Natural killer cell mediated cytotoxicity	21/479	116/6119	0.000215888	0.00909813	0.00840826	CD247/FCER1G/FCGR3A/KIR2DL5A/KIR2DS1/KIR3DL2/KIR3DS1/KLRC1/LOC100140174/LOC100336869/LOC100847738/LOC100852061/LOC112446743/LOC614781/LOC618565/LOC783508/LOC785982/SH3BP2/SYK/TYROBP/ZAP70	21
bta01523	KEGG	bta01523	Antifolate resistance	11/479	48/6119	0.00094957	0.0328403	0.0303501	ABCG2/ALOX12E/FOLR3/IL1B/IL6/LOC100847574/LOC107131218/LOC107131259/LOC509854/SHMT2/SLC46A1	11
bta04640	KEGG	bta04640	Hematopoietic cell lineage	16/479	87/6119	0.00100191	0.0328403	0.0303501	BOLA-DQA2/CD2/CD3D/CD3E/CD3G/CD55/CD7/CSF1R/FCGR1A/IL1B/IL2RA/IL3RA/IL6/ITGAM/LOC100138951/LOC781726	16
bta05142	KEGG	bta05142	Chagas disease	17/479	98/6119	0.00139002	0.0410056	0.0378963	C3/CCL2/CCL3/CD247/CD3D/CD3E/CD3G/GNA15/IL12B/IL1B/IL6/LOC509513/MAPK13/NOS2/PPP2R2B/SERPINE1/TNFRSF1A	17

## Sheet: TableS11B_DMEGs_in_GOterms
Table S11B DMEGs that enriched in multiple GO terms and KEGG pathways
	res_gene1	cluster1	cluster_2	cluster_3	cluster_4	cluster_5	total_GO	log2FC	meth.diff_pro	meth.diff_FE	meth.diff_FI	num_dMHBs_promoter	name_dmhbs_promoter	num_dMHBs_firstExon	name_dmhbs_firstExon	num_dMHBs_firstIntron	name_dmhbs_firstIntron	total dMHB
1	ACTA2	3	0	0	3	4	10	1.86389	11.8486	NA	NA	1	chr26:10644384:10644466	0	NA	0	NA	1
2	AGT	5	6	0	6	0	17	-1.59491	NA	17.7241	NA	0	NA	0	NA	0	NA	0
3	AIF1	12	11	5	1	5	34	1.19069	NA	-22.375	-16.9652	0	NA	0	NA	0	NA	0
4	ANGPTL4	2	0	0	1	0	3	1.34033	18.1298	NA	NA	3	chr7:17004156:17004196,chr7:17004410:17004470,chr7:17004456:17004514	0	NA	0	NA	3
5	ATP6V1B1	1	0	0	2	0	3	-1.9834	NA	34.8481	NA	0	NA	0	NA	0	NA	0
6	AVPR2	2	0	0	1	0	3	-4.03978	-15.7124	17.3072	NA	0	NA	0	NA	0	NA	0
7	B4GALT1	7	4	0	3	0	14	-1.11484	NA	NA	17.3173	0	NA	0	NA	15	chr8:74901782:74901807,chr8:74889766:74889776,chr8:74888355:74888442,chr8:74910841:74910921,chr8:74910456:74910541,chr8:74911812:74911838,chr8:74888982:74889061,chr8:74910225:74910313,chr8:74896505:74896576,chr8:74886913:74886964,chr8:74911981:74912006,chr8:74896911:74897010,chr8:74886000:74886034,chr8:74903062:74903111,chr8:74889206:74889251	15
8	BATF	10	0	3	0	5	18	1.09494	NA	NA	-24.1894	0	NA	0	NA	3	chr10:86716609:86716694,chr10:86715340:86715353,chr10:86715722:86715804	3
9	C15H11orf34	2	6	0	1	0	9	1.46385	16.1228	24.2604	NA	0	NA	0	NA	0	NA	0
10	C2	5	0	0	1	5	11	1.59499	NA	NA	12.6958	0	NA	0	NA	0	NA	0
11	C3	15	1	0	5	5	26	-1.89359	10.175	-13.6458	25.1252	0	NA	0	NA	0	NA	0
12	C4BPA	5	0	0	1	5	11	-2.57896	NA	25.125	NA	0	NA	0	NA	0	NA	0
13	CAPN3	7	1	1	0	0	9	1.00218	NA	-12.6747	NA	0	NA	0	NA	0	NA	0
14	CATHL3	2	0	0	0	5	7	1.88878	-16.4962	-12.3201	NA	0	NA	0	NA	0	NA	0
15	CCL2	7	9	0	4	4	24	2.03741	24.8082	19.8301	10.7372	0	NA	0	NA	0	NA	0
16	CCL3	16	11	0	4	4	35	1.95599	-13.7142	-40.7196	NA	1	chr19:14360087:14360101	0	NA	0	NA	1
17	CCR5	1	1	0	3	4	9	1.04457	NA	-31.175	NA	0	NA	0	NA	0	NA	0
18	CCRL2	1	0	0	2	0	3	2.13016	-20.1146	-21.6409	NA	1	chr22:53001921:53001978	0	NA	0	NA	1
19	CD3D	2	0	0	0	0	2	-1.19619	22.377	NA	16.8527	0	NA	0	NA	0	NA	0
20	CD3E	2	0	0	0	0	2	-1.54116	NA	17.4917	NA	0	NA	0	NA	0	NA	0
21	CD3G	2	0	0	0	0	2	-1.49726	22.377	24.0625	19.1106	0	NA	0	NA	0	NA	0
22	CD53	2	0	0	0	0	2	1.04606	NA	-15.9167	NA	0	NA	0	NA	0	NA	0
23	CELA2A	1	1	0	9	0	11	2.62341	-20.1508	NA	NA	1	chr16:52039257:52039356	0	NA	0	NA	1
24	CFB	5	0	0	1	5	11	1.11867	NA	13.8333	19.7583	0	NA	0	NA	0	NA	0
25	CHRND	1	0	0	1	0	2	-1.57577	14.3615	NA	NA	1	chr2:120165387:120165443	0	NA	0	NA	1
26	CLDN3	7	6	0	2	0	15	-1.66664	NA	14.0165	NA	0	NA	0	NA	0	NA	0
27	CLEC3B	1	0	0	0	0	1	-1.68823	11.1429	NA	11.8052	0	NA	0	NA	1	chr22:54164439:54164466
28	CLEC6A	8	0	0	0	5	13	1.62322	NA	NA	10.6336	0	NA	0	NA	0	NA	0
29	CMKLR1	5	3	0	1	0	9	1.79459	NA	-12.5212	NA	0	NA	0	NA	0	NA	0
30	CNFN	1	0	0	0	0	1	-3.33275	NA	30.2307	15.0892	0	NA	0	NA	0	NA	0
31	CNN1	2	0	0	0	0	2	-1.30636	NA	NA	14.0608	0	NA	0	NA	0	NA	0
32	CSN1S2	2	0	0	5	5	12	-5.28514	NA	13.25	15.25	0	NA	0	NA	0	NA	0
33	CSN2	7	1	0	12	0	20	-5.37755	21.2419	NA	23.9777	0	NA	0	NA	0	NA	0
34	CTNNBIP1	13	0	0	1	0	14	-1.0259	-16.7013	NA	NA	0	NA	0	NA	0	NA	0
35	CXCL11	4	8	0	1	0	13	-2.37442	NA	41.9792	33.25	0	NA	0	NA	0	NA	0
36	CXCL17	11	11	0	0	0	22	-2.22236	18.7287	30.5798	11.4484	0	NA	1	chr18:51506652:51506669	1	chr18:51505950:51505976	2
37	DEFB4A	1	3	0	0	0	4	1.25591	NA	-31.6583	-19.3183	0	NA	0	NA	0	NA	0
38	DEFB7	1	3	0	0	0	4	1.75528	NA	-28.5312	-19.9625	0	NA	0	NA	0	NA	0
39	DIO2	1	0	0	1	0	2	-4.70893	30.2908	24.7578	16.893	0	NA	0	NA	1	chr10:91503672:91503743
40	DMTN	8	6	1	6	0	21	-2.71154	-11.9281	NA	NA	0	NA	0	NA	0	NA	0
41	EDNRB	5	7	0	6	0	18	1.52982	15.7456	NA	NA	1	chr12:53068502:53068510	0	NA	0	NA	1
42	EHF	2	0	0	0	0	2	-3.62736	32.5232	41.125	36.5465	1	chr15:65190097:65190172	0	NA	22	chr15:65197933:65198046,chr15:65198290:65198362,chr15:65195892:65195915,chr15:65196340:65196418,chr15:65207959:65208046,chr15:65195357:65195447,chr15:65198492:65198546,chr15:65205537:65205603,chr15:65205359:65205411,chr15:65193589:65193658,chr15:65196128:65196193,chr15:65203459:65203496,chr15:65205698:65205781,chr15:65192076:65192118,chr15:65201059:65201147,chr15:65195274:65195368,chr15:65192977:…
43	ENPP3	11	0	0	0	0	11	-2.89356	NA	35.9583	NA	0	NA	0	NA	0	NA	0
44	ESR1	13	0	0	6	0	19	-3.67563	NA	-40.0714	NA	0	NA	0	NA	0	NA	0
45	FCER1G	5	0	0	2	0	7	1.4731	NA	-43.8112	-47.4269	0	NA	0	NA	2	chr3:8288984:8289033,chr3:8289091:8289130	2
46	FERMT3	2	6	1	4	0	13	1.06567	NA	-20.7205	-41.0818	0	NA	0	NA	1	chr29:42511193:42511262	1
47	FGFBP1	5	6	0	0	0	11	-4.72394	10.3778	21.5	27.6413	0	NA	0	NA	0	NA	0
48	FNDC4	4	0	0	2	0	6	-1.9101	NA	NA	18.3968	0	NA	0	NA	0	NA	0
49	FOLR3	1	0	0	3	0	4	-5.10215	14.1567	NA	24.7531	1	chr15:51783467:51783569	0	NA	1	chr15:51783467:51783569	2
50	FUT4	2	7	2	0	0	11	1.10773	NA	-12.2247	NA	0	NA	0	NA	0	NA	0
51	FUT7	9	7	3	3	0	22	1.377	-18.6192	NA	NA	0	NA	0	NA	0	NA	0
52	GATA3	20	7	5	4	5	41	-2.60106	NA	-26.8213	-13.6396	0	NA	0	NA	5	chr13:15923921:15923978,chr13:15924063:15924134,chr13:15922770:15922814,chr13:15922406:15922437,chr13:15923566:15923608	5
53	GPR4	10	0	0	5	0	15	1.88885	15.6389	NA	NA	1	chr18:53192076:53192140	0	NA	0	NA	1
54	GPR68	7	1	0	4	0	12	-3.89749	18.987	NA	NA	0	NA	0	NA	0	NA	0
55	HLX	15	0	8	0	0	23	1.23207	NA	NA	-15.0121	0	NA	0	NA	0	NA	0
56	HSTN	2	0	0	0	5	7	-4.97869	NA	16.725	13.3557	0	NA	0	NA	0	NA	0
57	IGF1	3	1	0	4	0	8	1.3625	NA	-14.1667	13.9441	0	NA	0	NA	0	NA	0
58	IL12B	11	0	8	0	0	19	1.68205	NA	-10.875	NA	0	NA	0	NA	0	NA	0
59	IL1B	7	0	0	0	0	7	1.63961	-19.7177	NA	NA	0	NA	0	NA	0	NA	0
60	IL2RA	1	0	0	1	0	2	1.04109	NA	-13.1882	NA	0	NA	1	chr13:17455401:17455428	0	NA	1
61	IL34	12	11	0	1	5	29	-1.41839	29.2924	34.9375	NA	3	chr18:1571632:1571693,chr18:1571128:1571162,chr18:1571576:1571654	0	NA	0	NA	3
62	IL6	20	1	8	10	5	44	1.29413	-11.8827	NA	NA	0	NA	0	NA	0	NA	0
63	IRF6	3	0	0	0	0	3	-2.10206	NA	NA	19.7956	0	NA	0	NA	2	chr16:73505968:73506029,chr16:73503459:73503516	2
64	ISG15	12	0	0	1	5	18	1.7682	NA	NA	13.3774	0	NA	0	NA	0	NA	0
65	KRT10	2	0	0	0	0	2	-2.1517	16.5874	NA	NA	0	NA	0	NA	0	NA	0
66	KRT19	1	0	0	2	0	3	-3.12175	29.7963	NA	18.9869	0	NA	0	NA	0	NA	0
67	LBP	9	0	0	2	5	16	-2.78437	15.2989	41.0546	14.547	1	chr13:67214863:67214935	1	chr13:67214863:67214935	0	NA	2
68	LGALS1	10	0	5	0	1	16	1.33218	-16.5998	NA	15.1537	0	NA	0	NA	0	NA	0
69	LPO	4	0	0	3	5	12	-4.79862	NA	NA	20.1458	0	NA	0	NA	0	NA	0
70	LTF	15	0	0	5	5	25	-3.41378	NA	10.9792	NA	0	NA	0	NA	0	NA	0
71	LYST	4	0	0	0	5	9	1.27992	10.6489	NA	NA	0	NA	0	NA	0	NA	0
72	MFGE8	2	0	0	0	0	2	-4.20871	19.377	26.5372	22.4798	0	NA	0	NA	0	NA	0
73	MGP	4	0	0	0	0	4	-2.30683	10.6	36.4286	NA	0	NA	0	NA	0	NA	0
74	MMP14	11	3	2	0	0	16	1.40462	NA	NA	13.0878	0	NA	0	NA	1	chr10:21975272:21975293	1
75	MMP9	8	7	0	6	0	21	1.00631	NA	-13.05	NA	0	NA	0	NA	0	NA	0
76	MSR1	2	1	0	0	0	3	1.17102	NA	-13.0625	NA	0	NA	0	NA	0	NA	0
77	MSTN	8	11	0	4	0	23	-2.22833	22.1794	36.3159	20.6582	1	chr2:6278768:6278809	0	NA	0	NA	1
78	NFIB	7	4	0	0	0	11	-3.70449	NA	NA	22.3964	0	NA	0	NA	7	chr8:29858252:29858338,chr8:29857019:29857071,chr8:29857950:29858040,chr8:29858843:29858930,chr8:29853735:29853821,chr8:29857686:29857776,chr8:29857303:29857340	7
79	NLRC4	9	0	0	0	5	14	1.77676	-16.1372	-34.6476	NA	0	NA	0	NA	0	NA	0
80	NLRP3	14	0	8	0	5	27	1.9471	NA	-12.5625	-39.7067	0	NA	0	NA	0	NA	0
81	NOD2	13	9	5	5	5	37	1.36937	NA	NA	13.5384	0	NA	0	NA	0	NA	0
82	NOS2	4	0	0	0	0	4	2.27551	10.6739	30.3482	-23.2257	1	chr19:19431115:19431185	0	NA	0	NA	1
83	NR2F2	6	4	0	0	0	10	-1.7957	-27.0692	NA	NA	0	NA	0	NA	0	NA	0
84	NR4A1	6	6	0	6	0	18	-1.12475	-10.7365	-25.1083	NA	1	chr5:27839376:27839428	0	NA	0	NA	1
85	NRROS	5	0	0	2	0	7	1.13113	-22.2366	NA	NA	1	chr1:71154841:71154885	0	NA	0	NA	1
86	OVOL1	3	0	0	0	0	3	-2.24896	12.9164	NA	17.8791	0	NA	0	NA	2	chr29:43913664:43913726,chr29:43914854:43914874	2
87	PDE2A	5	0	0	4	0	9	-1.06076	14.0115	NA	NA	0	NA	0	NA	0	NA	0
88	PF4	10	7	0	6	0	23	1.86036	-11.6235	NA	NA	0	NA	0	NA	0	NA	0
89	PGF	3	3	0	0	0	6	-2.1294	11.603	NA	25.9596	1	chr10:86214686:86214748	0	NA	1	chr10:86212852:86212868	2
90	PGK1	6	0	0	0	0	6	1.35837	10.8044	NA	NA	0	NA	0	NA	0	NA	0
91	PIGR	2	0	0	0	0	2	-4.5928	11.3464	45.1667	19.5356	3	chr16:4731036:4731053,chr16:4731036:4731090,chr16:4730884:4730954	0	NA	1	chr16:4725600:4725660
92	PLA2G3	6	1	0	0	0	7	-2.1788	NA	18.0882	33.3029	0	NA	1	chr17:69988131:69988152	3	chr17:69987036:69987106,chr17:69987516:69987532,chr17:69986701:69986751	4
93	PLA2G4A	1	0	1	4	0	6	1.39189	-17.0266	NA	NA	0	NA	0	NA	0	NA	0
94	PTGDS	5	0	0	0	1	6	-2.06014	29.9314	20.5006	15.2699	1	chr11:106021500:106021539	0	NA	0	NA	1
95	PTX3	4	0	0	0	5	9	1.21396	NA	-10.2695	NA	0	NA	0	NA	0	NA	0
96	RAB13	2	6	0	4	0	12	-2.6732	NA	10.489	15.778	0	NA	0	NA	0	NA	0
97	RAB25	5	6	0	1	0	12	-2.19839	NA	39.9846	10.6099	0	NA	1	chr3:14707922:14707978	2	chr3:14707101:14707145,chr3:14707480:14707562	3
98	REEP6	1	0	0	1	0	2	-4.04198	NA	NA	12.9521	0	NA	0	NA	1	chr7:43897180:43897277
99	RHOC	2	6	0	1	0	9	-2.25015	NA	NA	16.8559	0	NA	0	NA	4	chr3:30619606:30619646,chr3:30620746:30620786,chr3:30620469:30620519,chr3:30620518:30620584	4
100	RILPL2	2	0	0	1	0	3	1.48921	NA	NA	-14.2396	0	NA	0	NA	2	chr17:52181202:52181249,chr17:52182006:52182048	2
101	RNASE6	2	0	0	0	5	7	1.43253	-10.1679	-10.125	-38.7216	0	NA	0	NA	0	NA	0
102	RP1	1	0	0	1	0	2	-1.29255	13.2598	NA	NA	1	chr14:22333479:22333553	0	NA	0	NA	1
103	S100A8	6	8	1	5	5	25	1.82016	NA	NA	-14.5457	0	NA	0	NA	0	NA	0
104	S100A9	6	7	1	4	5	23	1.25133	NA	NA	-11.0554	0	NA	0	NA	0	NA	0
105	S100B	8	0	0	2	0	10	-4.89384	NA	NA	10.9452	0	NA	0	NA	1	chr1:146278112:146278181	1
106	SBNO2	5	0	0	2	4	11	1.19923	24.1718	NA	NA	1	chr7:43632937:43632968	0	NA	0	NA	1
107	SCN1B	3	5	0	1	0	9	-2.65768	NA	NA	12.8744	0	NA	0	NA	0	NA	0
108	SELL	1	4	1	0	0	6	1.63487	10.3839	-51.6875	-38.3259	0	NA	0	NA	0	NA	0
109	SELP	1	5	2	0	0	8	1.32116	-12.8271	NA	NA	0	NA	0	NA	0	NA	0
110	SEMA4A	7	0	0	0	0	7	1.92525	NA	34.625	NA	0	NA	0	NA	0	NA	0
111	SERPING1	6	0	0	4	0	10	-1.69462	14.9772	NA	NA	1	chr15:80849019:80849095	0	NA	0	NA	1
112	SFN	7	1	0	5	0	13	-2.26315	18.6633	24.0902	NA	2	chr2:126342393:126342408,chr2:126341715:126341782	0	NA	0	NA	2
113	SHMT2	4	0	0	2	5	11	1.47029	10.9422	NA	NA	0	NA	0	NA	0	NA	0
114	SLC39A14	1	0	0	7	0	8	-1.61805	NA	NA	11.9698	0	NA	0	NA	5	chr8:69686722:69686745,chr8:69683780:69683821,chr8:69710144:69710190,chr8:69694255:69694301,chr8:69702634:69702673	5
115	SLC44A4	2	0	0	0	0	2	1.18848	25.9706	34.5	12.8923	1	chr23:27480104:27480139	0	NA	0	NA	1
116	SLC8A1	1	1	0	1	0	3	-1.29243	19.5199	38.3188	NA	1	chr11:22855034:22855112	0	NA	0	NA	1
117	SPP1	1	0	0	0	0	1	1.03888	26.1625	43.875	NA	0	NA	0	NA	0	NA	0
118	TCIM	7	0	0	0	0	7	-2.24021	23.7847	32.0363	NA	3	chr27:35232234:35232321,chr27:35232169:35232255,chr27:35232590:35232679	2	chr27:35233191:35233259,chr27:35232590:35232679	0	NA	5
119	THBS2	5	0	0	0	0	5	1.66861	13.5641	NA	10.9145	0	NA	0	NA	1	chr9:103183289:103183323	1
120	TIE1	2	0	0	0	0	2	-1.80102	NA	-22.175	-22.6508	0	NA	0	NA	0	NA	0
121	TMEM102	4	11	0	1	0	16	-2.50243	NA	28.9926	15.616	0	NA	0	NA	1	chr19:27112398:27112434	1
122	TNFAIP8L2	4	0	0	0	5	9	1.42629	NA	-32.4167	-36.4214	0	NA	0	NA	4	chr3:19656072:19656166,chr3:19656444:19656518,chr3:19655919:19655983,chr3:19656315:19656329	4
123	TNFRSF1A	4	0	0	1	0	5	1.39098	-17.9303	NA	NA	4	chr5:104022101:104022154,chr5:104022879:104022931,chr5:104022209:104022232,chr5:104022914:104022967	0	NA	0	NA	4
124	TNNT2	1	0	0	1	0	2	-2.13796	NA	NA	19.1028	0	NA	0	NA	0	NA	0
125	TREM1	4	0	0	0	5	9	1.54581	NA	-16.625	-13.7576	0	NA	0	NA	0	NA	0
126	TRIM56	7	0	0	1	5	13	1.06573	NA	NA	11.8327	0	NA	0	NA	0	NA	0
127	TYROBP	6	0	0	0	5	11	1.18128	-34.4391	-35.0946	-22.3128	1	chr18:46595656:46595706	0	NA	0	NA	1
128	ZNF750	3	0	0	0	0	3	-1.86296	36.096	37.5833	24.8411	1	chr19:49854967:49855018	0	NA	0	NA	1
129	CFAP206	0	4	0	0	0	4	1.63158	-14.3644	NA	NA	0	NA	0	NA	0	NA	0
130	CRYAB	0	1	0	0	0	1	-1.54651	19.0379	35.8159	41.2173	0	NA	0	NA	1	chr15:22244291:22244396
131	GOLPH3L	0	1	0	0	0	1	-1.91256	NA	NA	13.9244	0	NA	0	NA	1	chr3:20043084:20043143
132	GRB7	0	6	0	0	0	6	-1.07072	20.019	32.25	24.5417	0	NA	0	NA	5	chr19:40104489:40104587,chr19:40105136:40105241,chr19:40105208:40105309,chr19:40105558:40105591,chr19:40104828:40104869	5
133	PNPLA2	0	1	0	1	0	2	-1.18719	NA	36.9167	NA	0	NA	0	NA	0	NA	0
134	A2M	0	0	0	3	0	3	1.15489	NA	11.0058	NA	0	NA	0	NA	0	NA	0
135	ABCG2	0	0	0	2	0	2	-4.74114	NA	NA	-22.4167	0	NA	0	NA	1	chr6:36549564:36549583
136	ADGRL2	0	0	0	1	0	1	-1.42616	NA	29.6292	NA	0	NA	0	NA	0	NA	0
137	AGRP	0	0	0	3	0	3	-1.60617	17.1166	NA	NA	0	NA	0	NA	0	NA	0
138	ALDH1A1	0	0	0	5	0	5	-2.92497	NA	NA	15.2019	0	NA	0	NA	0	NA	0
139	ALOX5AP	0	0	0	3	0	3	1.1068	NA	-32.1813	NA	0	NA	1	chr12:30134473:30134527	0	NA	1
140	CITED4	0	0	0	2	0	2	-3.39964	11.2221	NA	NA	0	NA	0	NA	0	NA	0
141	CNGA1	0	0	0	1	0	1	-1.31403	18.6923	33.375	NA	0	NA	0	NA	0	NA	0
142	CPQ	0	0	0	1	0	1	-1.30364	NA	21.6051	NA	0	NA	0	NA	0	NA	0
143	CRABP1	0	0	0	1	0	1	-1.64961	-24.1495	NA	NA	0	NA	0	NA	0	NA	0
144	CSN1S1	0	0	0	8	0	8	-5.1583	13.1078	NA	22.5491	0	NA	0	NA	0	NA	0
145	CSN3	0	0	0	4	0	4	-5.41971	20.2	26.6667	29.7206	0	NA	0	NA	0	NA	0
146	CTH	0	0	0	1	0	1	-1.87028	NA	NA	10.0191	0	NA	0	NA	0	NA	0
147	CXCR1	0	0	0	2	0	2	1.56486	17.7845	NA	NA	0	NA	0	NA	0	NA	0
148	DHRS11	0	0	0	1	0	1	-2.09706	NA	NA	18.2947	0	NA	0	NA	1	chr19:12933032:12933125
149	F11	0	0	0	3	0	3	2.18037	NA	12.1667	NA	0	NA	0	NA	0	NA	0
150	F2RL2	0	0	0	4	0	4	1.12834	NA	-23.5739	10.2077	0	NA	0	NA	0	NA	0
151	FBP2	0	0	0	1	0	1	-2.81569	10.836	17.58	NA	0	NA	0	NA	0	NA	0
152	GCAT	0	0	0	1	0	1	-4.03417	NA	NA	10.018	0	NA	0	NA	0	NA	0
153	GPD1	0	0	0	1	0	1	-3.83358	21.4168	35.25	38.4268	1	chr5:29796563:29796611	0	NA	2	chr5:29794209:29794234,chr5:29794583:29794673
154	GPR158	0	0	0	1	0	1	-1.82325	NA	-28.8125	NA	0	NA	0	NA	0	NA	0
155	GUCY2D	0	0	0	1	0	1	-3.25816	26.0651	NA	NA	0	NA	0	NA	0	NA	0
156	ISYNA1	0	0	0	1	0	1	1.05368	24.7093	NA	NA	2	chr7:4736772:4736857,chr7:4737268:4737319	0	NA	0	NA	2
157	LALBA	0	0	0	5	0	5	-5.05369	NA	35.0208	14.5	0	NA	0	NA	0	NA	0
158	LOC404103	0	0	0	3	0	3	-1.23346	NA	-13.428	NA	0	NA	0	NA	0	NA	0
159	LPAR5	0	0	0	1	0	1	1.37842	NA	37.0625	30.2639	0	NA	0	NA	1	chr5:103798699:103798751
160	LTB4R	0	0	0	1	0	1	1.31817	NA	-26.0314	-32.1179	0	NA	0	NA	0	NA	0
161	NCALD	0	0	0	1	0	1	-2.05755	19.1208	NA	NA	0	NA	0	NA	0	NA	0
162	RDH12	0	0	0	6	0	6	-1.99374	NA	NA	14.5038	0	NA	0	NA	0	NA	0
163	RHPN2	0	0	0	1	0	1	-3.01887	NA	NA	12.7263	0	NA	0	NA	3	chr18:43461405:43461497,chr18:43461137:43461225,chr18:43472543:43472591
164	SCNN1A	0	0	0	4	0	4	-2.06393	15.135	35.2031	32.8221	1	chr5:103993026:103993038	0	NA	0	NA	1
165	SDS	0	0	0	2	0	2	1.44438	NA	17.2083	NA	0	NA	0	NA	0	NA	0
166	SLC14A1	0	0	0	1	0	1	-1.12643	16.0936	44.3246	NA	0	NA	0	NA	0	NA	0
167	SLC46A1	0	0	0	1	0	1	1.00729	NA	NA	16.8218	0	NA	0	NA	0	NA	0
168	ACE2	0	0	0	0	1	1	-2.33331	-12.9193	20.0825	NA	0	NA	0	NA	0	NA	0

## Sheet: ableS11C_dMHB_DEMGs
Table S11C Functional enrichment for dMHB-DMEGs
	ONTOLOGY	ID	Description	GeneRatio	BgRatio	pvalue	p.adjust	qvalue	geneID	Count	Cluster			ID
GO:0009888	BP	GO:0009888	tissue development	24/111	273/3822	5.39416e-07	0.000770287	0.000654113	ACTA2/AGT/B4GALT1/CHRND/CLEC3B/EDNRB/EHF/GATA3/GPR4/IRF6/LTF/MMP14/MSTN/NFIB/NR4A1/OVOL1/RAB25/RHOC/RILPL2/SBNO2/SFN/SLC39A14/SLC44A4/ZNF750	24	cluster_1	GO:0009888		GO:0009605
GO:0002376	BP	GO:0002376	immune system process	30/111	448/3822	5.78763e-06	0.00361361	0.00306861	B4GALT1/BATF/CCL3/CD3E/CFB/CXCL17/EDNRB/FCER1G/GATA3/IL2RA/IL34/LBP/LPO/LTF/LYST/MMP14/MSTN/NOD2/NRROS/PIGR/PLA2G3/PTGDS/S100B/SBNO2/SERPING1/TCIM/TMEM102/TNFAIP8L2/TRIM56/TYROBP	30	cluster_2	GO:0002376		GO:0002376
GO:1905517	BP	GO:1905517	macrophage migration	5/111	11/3822	7.59161e-06	0.00361361	0.00306861	CCL3/CXCL17/EDNRB/IL34/MSTN	5	cluster_3	#N/A		GO:0006952
GO:0006955	BP	GO:0006955	immune response	22/111	289/3822	1.89579e-05	0.00482209	0.00409483	BATF/CCL3/CD3E/CFB/FCER1G/GATA3/IL34/LBP/LPO/LTF/LYST/NOD2/NRROS/PIGR/PLA2G3/PTGDS/S100B/SERPING1/TCIM/TNFAIP8L2/TRIM56/TYROBP	22	cluster_2	GO:0006955		GO:0006955
GO:0002688	BP	GO:0002688	regulation of leukocyte chemotaxis	6/111	21/3822	1.99325e-05	0.00482209	0.00409483	CCL3/CXCL17/IL34/MSTN/NOD2/TMEM102	6	cluster_3	#N/A		GO:0050900
GO:0051239	BP	GO:0051239	regulation of multicellular organismal process	27/111	404/3822	2.02609e-05	0.00482209	0.00409483	AGT/BATF/CAPN3/CCL3/CXCL17/DIO2/EDNRB/FCER1G/GATA3/GPR4/IL34/LBP/LTF/MMP14/NFIB/NOD2/NOS2/PTGDS/RAB25/S100B/SERPING1/SFN/SLC8A1/TCIM/THBS2/TRIM56/ZNF750	27	cluster_2	GO:0051239		GO:0002684
GO:0030335	BP	GO:0030335	positive regulation of cell migration	11/111	86/3822	2.95983e-05	0.00532365	0.00452075	AGT/CCL3/CXCL17/FERMT3/GATA3/GRB7/IL34/MSTN/RAB25/RHOC/TMEM102	11	cluster_4	GO:0030335		GO:0009888
GO:0030855	BP	GO:0030855	epithelial cell differentiation	12/111	102/3822	2.98244e-05	0.00532365	0.00452075	ACTA2/B4GALT1/EDNRB/EHF/GATA3/GPR4/IRF6/NFIB/RAB25/RILPL2/SFN/SLC44A4	12	cluster_1	#N/A		GO:0032101
GO:0009605	BP	GO:0009605	response to external stimulus	28/111	449/3822	4.98004e-05	0.00570076	0.00484098	ACTA2/BATF/CAPN3/CCL3/CFB/CXCL17/EDNRB/FOLR3/GATA3/GPR4/IL34/LBP/LPO/LTF/LYST/MSTN/NFIB/NOD2/NR4A1/PGF/REEP6/SBNO2/SERPING1/TMEM102/TNFAIP8L2/TNFRSF1A/TRIM56/TYROBP	28	cluster_2	GO:0009605		GO:0006935
GO:0006952	BP	GO:0006952	defense response	21/111	286/3822	5.22775e-05	0.00570076	0.00484098	B4GALT1/BATF/CCL3/CCRL2/CFB/CXCL17/GATA3/GPR4/IL34/LBP/LPO/LTF/LYST/NOD2/NOS2/NRROS/S100B/TNFAIP8L2/TNFRSF1A/TRIM56/TYROBP	21	cluster_2	GO:0006952		GO:0042330
GO:0040017	BP	GO:0040017	positive regulation of locomotion	11/111	93/3822	6.21656e-05	0.00570076	0.00484098	AGT/CCL3/CXCL17/FERMT3/GATA3/GRB7/IL34/MSTN/RAB25/RHOC/TMEM102	11	cluster_4	GO:0040017		GO:0040011
GO:0060326	BP	GO:0060326	cell chemotaxis	8/111	54/3822	0.00013434	0.0112846	0.00958264	CCL3/CXCL17/EDNRB/IL34/MSTN/NOD2/NR4A1/TMEM102	8	cluster_3	GO:0060326		GO:0051239
GO:0035850	BP	GO:0035850	epithelial cell differentiation involved in kidney development	4/111	11/3822	0.00019003	0.0117984	0.010019	ACTA2/EDNRB/GATA3/GPR4	4	cluster_5	GO:0035850		GO:0050727
GO:0001775	BP	GO:0001775	cell activation	14/111	167/3822	0.000277021	0.0146856	0.0124707	BATF/CAPN3/CCL3/CELA2A/FERMT3/GATA3/LBP/MMP14/NOD2/PLA2G3/PLA2G4A/PTGDS/S100B/TCIM	14	cluster_2	GO:0001775		GO:0060326
GO:0006935	BP	GO:0006935	chemotaxis	10/111	92/3822	0.000277668	0.0146856	0.0124707	CCL3/CXCL17/EDNRB/IL34/MSTN/NFIB/NOD2/NR4A1/PGF/TMEM102	10	cluster_3	GO:0006935		GO:0030335
GO:0042330	BP	GO:0042330	taxis	10/111	92/3822	0.000277668	0.0146856	0.0124707	CCL3/CXCL17/EDNRB/IL34/MSTN/NFIB/NOD2/NR4A1/PGF/TMEM102	10	cluster_3	GO:0042330		GO:0007159
GO:0072006	BP	GO:0072006	nephron development	5/111	22/3822	0.000334924	0.0159424	0.013538	ACTA2/AGT/EDNRB/GATA3/GPR4	5	cluster_5	#N/A		GO:0040017
GO:0050920	BP	GO:0050920	regulation of chemotaxis	6/111	34/3822	0.000362962	0.0164183	0.0139422	CCL3/CXCL17/IL34/MSTN/NOD2/TMEM102	6	cluster_3	GO:0050920		GO:0002064
GO:0016051	BP	GO:0016051	carbohydrate biosynthetic process	6/111	35/3822	0.000427817	0.0179683	0.0152584	B4GALT1/FBP2/GPD1/ISYNA1/SDS/SLC39A14	6	cluster_1	GO:0016051		GO:0043207
GO:0001816	BP	GO:0001816	cytokine production	12/111	135/3822	0.000455694	0.0185923	0.0157883	BATF/CCL3/CXCL17/FCER1G/GATA3/LBP/LTF/NOD2/NOS2/NRROS/S100B/TRIM56	12	cluster_2	GO:0001816		GO:0051707
GO:0009653	BP	GO:0009653	anatomical structure morphogenesis	23/111	387/3822	0.000555738	0.0201115	0.0170783	ACTA2/AGT/ANGPTL4/B4GALT1/CAPN3/CCL3/CD53/CXCL17/FERMT3/GATA3/GPR4/LTF/MMP14/NFIB/NR4A1/RAB25/RHOC/RILPL2/RP1/S100B/SBNO2/SLC44A4/THBS2	23	cluster_1	GO:0009653		GO:0098542
GO:0040011	BP	GO:0040011	locomotion	18/111	268/3822	0.00058521	0.0203824	0.0173084	AGT/B4GALT1/CCL3/CXCL17/EDNRB/FERMT3/GATA3/GRB7/IL34/MMP14/MSTN/NFIB/NOD2/NR4A1/PGF/RAB25/RHOC/TMEM102	18	cluster_4	GO:0040011		GO:0044419
GO:0002684	BP	GO:0002684	positive regulation of immune system process	12/111	141/3822	0.000677891	0.022887	0.0194352	CCL3/CFB/CXCL17/GATA3/IL34/MMP14/MSTN/NOD2/S100B/SERPING1/TMEM102/TYROBP	12	cluster_3	GO:0002684		GO:0051674
GO:0032103	BP	GO:0032103	positive regulation of response to external stimulus	9/111	85/3822	0.000689174	0.022887	0.0194352	CCL3/CXCL17/GPR4/IL34/MSTN/NOD2/TMEM102/TNFRSF1A/TYROBP	9	cluster_3	#N/A		GO:0032355
GO:0010817	BP	GO:0010817	regulation of hormone levels	8/111	70/3822	0.000828292	0.0257131	0.0218351	CELA2A/CPQ/DHRS11/DIO2/EDNRB/GATA3/PNPLA2/SLC39A14	8	cluster_1	GO:0010817		GO:0009607
GO:0001817	BP	GO:0001817	regulation of cytokine production	11/111	132/3822	0.00136184	0.0366925	0.0311586	BATF/CCL3/CXCL17/FCER1G/GATA3/LBP/LTF/NOD2/NOS2/S100B/TRIM56	11	cluster_2	#N/A		GO:0031960
GO:0051674	BP	GO:0051674	localization of cell	16/111	245/3822	0.00163904	0.0401106	0.0340612	AGT/B4GALT1/CCL3/CXCL17/EDNRB/FERMT3/GATA3/GRB7/IL34/MMP14/MSTN/NOD2/NR4A1/RAB25/RHOC/TMEM102	16	cluster_4	GO:0051674		GO:0022409
GO:0007166	BP	GO:0007166	cell surface receptor signaling pathway	21/111	372/3822	0.00194727	0.0463451	0.0393554	ADGRL2/AGT/CCL3/CCRL2/CHRND/EDNRB/FCER1G/FERMT3/GATA3/IL2RA/IL34/LTF/MMP14/MSTN/NOD2/NRROS/RBPJ/SLC39A14/TCIM/TNFRSF1A/TYROBP	21	cluster_2	#N/A		GO:0001816
GO:0005576	CC	GO:0005576	extracellular region	68/244	333/4051	2.66265e-21	6.33711e-19	5.96994e-19	AGRP/AGT/B4GALT1/BRB/C2/CATHL3/CCL3/CELA2A/CFB/CLEC3B/CPQ/CRYAB/CSN1S1/CSN1S2/CSN2/CSN3/CXCL17/DHRS11/ECM2/ELN/ENPP3/ENPP6/F11/F5/FGFBP1/FGG/FNDC4/FOLR3/GPI/HAPLN1/HSTN/IGF1/IL12B/IL1B/IL34/IL6/ISG15/LALBA/LBP/LHB/LPO/LTF/MFGE8/MGP/MMP9/MSR1/MUC15/NLRP3/NRROS/OGN/OLFML3/PGA5/PGK1/PIGR/PLA2G3/PLAU/PRELP/PRSS23/PTGDS/PTX3/RETN/S100A9/SCNN1A/SFN/SPADH1/SPP1/THBS2/XDH	68		GO:0005576		GO:0042127
GO:0098590	CC	GO:0098590	plasma membrane region	27/244	210/4051	0.00011113	0.00881628	0.00830547	ABCG2/ACE2/AIF1/ATP6V1B1/B4GALT1/C15H11orf34/CASZ1/CHRND/CLDN3/CLDN7/DMTN/ENPP3/FOLR3/KRT19/MXRA8/NEU3/NOD2/PDE2A/RAB25/RHBG/RHOC/SCNN1A/SLC14A1/SLC39A14/SLC44A4/SLC46A1/SLC8A1	27		GO:0098590		GO:0006928
GO:0031226	CC	GO:0031226	intrinsic component of plasma membrane	17/244	109/4051	0.000225672	0.0134275	0.0126495	CCRL2/CHRND/FCER1G/FOLR3/NCF1/NCF2/NOD2/RHBG/SCN1B/SCNN1A/SELL/SELP/SLC14A1/SLC39A14/SLC8A1/TMEM150B/TYROBP	17		GO:0031226		GO:0001819
bta04060	KEGG	bta04060	Cytokine-cytokine receptor interaction	16/163	201/6119	7.91078e-05	0.0141123	0.0135713	ACVR2B/CCL26/CCL28/CCL3/CSF1R/CSF2RB/CXCL17/IL2RA/IL33/IL34/LOC508666/MPL/MSTN/TNFRSF1A/TNFSF15/TNFSF4	16		bta04060		GO:0007186
bta04610	KEGG	bta04610	Complement and coagulation cascades	8/163	57/6119	0.000116151	0.0141123	0.0135713	C5AR1/CFB/ITGAM/LOC281376/MASP1/SERPINA1/SERPINE1/SERPING1	8		bta04610		GO:0042060
bta04380	KEGG	bta04380	Osteoclast differentiation	11/163	119/6119	0.000300201	0.0243163	0.0233841	BTK/CSF1R/FCGR2A/FCGR3A/MAPK13/NCF1/NCF2/SPI1/SYK/TNFRSF1A/TYROBP	11		bta04380		GO:0010033
														GO:0010817
				0.21875										GO:0001775
														GO:0002263
														GO:0009653
														GO:0009719
														GO:0035850
														GO:0006956
														GO:0002521
														GO:0050867
														GO:1901652
														GO:0042093
														GO:0010951
														GO:0050878
														GO:0035239
														GO:0050793
														GO:0002287
														GO:0030168
														GO:0050920
														GO:0050817
														GO:0016051
														GO:0050870
														GO:2000026
														GO:0051346
														GO:0008283
														GO:0035710
														GO:0042886
														GO:0071222
														GO:0009636
														GO:0032879
														GO:0003008
														GO:0051251
														GO:0009069
														GO:0045597
														GO:0097237
														GO:1990748
														GO:0052548
														GO:0048018
														GO:0030546
														GO:0030545
														GO:0038023
														GO:0060089
														GO:0005102
														GO:0005539
														GO:0031406
														GO:0043177
														GO:0004930
														GO:0005509
														GO:0005501
														GO:0019840
														GO:0005576
														GO:0098590
														GO:0031226
														bta04060
														bta04610
														bta04061
														bta05150
														bta05332
														bta04380
														bta04650
														bta01523
														bta04640
														bta05142
