# Supplementary material for: Genome-Wide DNA Methylation and Transcriptome Integration Associates DNA Methylation Changes with Bovine Subclinical Mastitis Caused by Staphylococcus chromogenes
Source: Int J Mol Sci. 2023 Jun 20;24(12):10369. doi: 10.3390/ijms241210369 (PMC10299661; doi:10.3390/ijms241210369)
Supplement: Supplementary file 1 [file ijms-24-10369-s001.zip › TableS12 Candidate discriminate signatures of SC mastitis selected by sPLS-DA and DIABLO.xlsx]

## Sheet: TableS12A_sPLS-DA
Table S12A Candidate discriminate signatures of SC mastitis selected by sPLS-DA
	ID	sPLS-DA.loading.weight	chr_NC	start	end	chr	dmc_num	type	width	promoter_symbol	gene_symbol	dmr_num
4	chr3:103394248:103394328	-0.788633	NC_037330.1	103394248	103394328	chr3	4	transcripts;first intron;CpG-shelves;repeats;genes	81	NA	ZNF691	1
6	chr8:74358861:74358960	-0.436778	NC_037335.1	74358861	74358960	chr8	2	transcripts;first intron;CpG-deserts;genes	100	NA	STMN4	0
3	chr22:51824718:51824755	-0.36598	NC_037349.1	51824718	51824755	chr22	9	transcripts;first intron;CpG-deserts;genes	38	NA	MAP4	0
5	chr7:39009285:39009377	0.183356	NC_037334.1	39009285	39009377	chr7	1	transcripts;first intron;CpG-shelves;genes	93	NA	DOK3	1
2	chr22:42873897:42873933	-0.140174	NC_037349.1	42873897	42873933	chr22	1	promoters;CpG-deserts;inter	37	KCTD6	NA	1
1	chr22:12575510:12575535	-0.00854682	NC_037349.1	12575510	12575535	chr22	3	transcripts;first intron;CpG-deserts;genes	26	NA	CX3CR1	1

## Sheet: TableS12B_DIABLO
Table S12B Candidate discriminate signatures of SC mastitis selected by DIABLO
	ID	DIABLO.loading	ID.y	chr_NC	start	end	chr	dmc_num	type	width	promoter_symbol	gene_symbol	TSS_symbol	X5UTR_symbol	X3UTR_symbol	downstream_symbol	PI8CT	SR27CT	SR51CT	SR52CT	ME39q2SC	MK2356q4SC	PI6908q2SC	SR65q2SC	diff	pvalue	var	padj_ihw	padj_BH	padj_ihw0.2	padj_BH0.2
11	chr7:39009285:39009377	-0.644271	NC_037334.1:39009285:39009377	NC_037334.1	39009285	39009377	chr7	1	transcripts;first intron;CpG-shelves;genes	93	NA	DOK3	NA	NA	NA	NA	1	1	0.875	1	0	0.166667	0	0	-0.927083	4.05555e-06	0.250217	0.0126006	0.0245177	0.0113378	0.0106516
4	chr23:13068615:13068711	0.321006	NC_037350.1:13068615:13068711	NC_037350.1	13068615	13068711	chr23	2	transcripts;first intron;CpG-deserts;genes	97	NA	KCNK5	NA	NA	NA	NA	0.141886	0.180556	0.0624715	0.156151	0.763889	0.671296	0.830303	0.667262	0.597922	4.30952e-05	0.105914	0.0126006	0.0245177	0.0113378	0.0106516
10	chr6:59210589:59210700	-0.317276	NC_037333.1:59210589:59210700	NC_037333.1	59210589	59210700	chr6	1	transcripts;first intron;CpG-deserts;genes	112	NA	RHOH	NA	NA	NA	NA	0.727273	0.666667	0.8125	0.625	0.153846	0.142857	0.1	0.0526316	-0.595526	7.564e-05	0.10508	0.0127726	0.0248026	0.0115117	0.0108165
2	chr15:13980470:13980527	0.298742	NC_037342.1:13980470:13980527	NC_037342.1	13980470	13980527	chr15	4	transcripts;first intron;CpG-deserts;genes	58	NA	MAML2	NA	NA	NA	NA	0.366667	0.437418	0.412659	0.369702	0.84871	0.908636	0.822097	0.749074	0.435518	0.0001529	0.0565746	0.0131929	0.0265294	0.0120764	0.0116131
9	chr5:112438523:112438581	0.29013	NC_037332.1:112438523:112438581	NC_037332.1	112438523	112438581	chr5	2	transcripts;first intron;CpG-shelves;genes	59	NA	ZC3H7B	NA	NA	NA	NA	0.423027	0.502688	0.412477	0.423902	0.906262	0.894633	0.992593	0.839499	0.467723	4.80517e-05	0.0649703	0.0126006	0.0245177	0.0113378	0.0106516
8	chr5:103796287:103796301	0.277705	NC_037332.1:103796287:103796301	NC_037332.1	103796287	103796301	chr5	1	transcripts;exons;5UTR;CpG-deserts;genes	15	NA	LPAR5	NA	LPAR5	NA	NA	0.32192	0.222705	0.304846	0.359066	0.775821	0.786996	0.827482	0.909957	0.522929	1.64575e-05	0.0811352	0.0126006	0.0245177	0.0113378	0.0106516
7	chr3:26239369:26239425	-0.232629	NC_037330.1:26239369:26239425	NC_037330.1	26239369	26239425	chr3	5	promoters;CpG-deserts;inter	57	CD101	NA	NA	NA	NA	NA	0.672943	0.623055	0.631432	0.502404	0.0125088	0.135844	0.085962	0.00715782	-0.54709	3.30887e-05	0.0894616	0.0126006	0.0245177	0.0113378	0.0106516
1	chr13:15923921:15923978	0.193499	NC_037340.1:15923921:15923978	NC_037340.1	15923921	15923978	chr13	3	transcripts;first intron;CpG-shores;genes	58	NA	GATA3	NA	NA	NA	NA	0.213936	0.0877232	0.0807842	0.159868	0.713751	0.740942	0.809238	0.620952	0.585643	3.19978e-05	0.102318	0.0126006	0.0245177	0.0113378	0.0106516
5	chr29:49281592:49281642	-0.191763	NC_037356.1:49281592:49281642	NC_037356.1	49281592	49281642	chr29	5	transcripts;first intron;CpG-deserts;genes	51	NA	TSPAN32	NA	NA	NA	NA	0.780307	0.863423	0.728053	0.818271	0.0608875	0.250128	0.0736495	0.218365	-0.646756	0.000106637	0.124993	0.0136649	0.025258	0.0121082	0.0110212
6	chr29:50554353:50554468	0.0415908	NC_037356.1:50554353:50554468	NC_037356.1	50554353	50554468	chr29	5	promoters;CpG-shores;inter	116	PNPLA2	NA	NA	NA	NA	NA	0.164291	0.343582	0.278413	0.358185	0.826599	0.790205	0.811111	0.713998	0.49936	0.000247262	0.0756569	0.0142017	0.0275388	0.0126698	0.012076
3	chr15:14127097:14127167	0.0245598	NC_037342.1:14127097:14127167	NC_037342.1	14127097	14127167	chr15	7	transcripts;first intron;CpG-deserts;genes	71	NA	MAML2	NA	NA	NA	NA	0.670611	0.633632	0.604319	0.584155	0.914388	0.852718	0.922725	0.920245	0.27934	3.47257e-05	0.0233775	0.0126669	0.0245177	0.0113378	0.0106516
	gene_symbol	value.var	baseMean	log2FoldChange	lfcSE	stat	pvalue	padj
1	CEACAM19	-0.438802	35.4197	-2.08614	1.18864	-1.75507	0.0792476	NA
2	LOC615514	-0.61692	6.81495	-2.88449	2.32404	-1.24116	0.214548	NA
3	MASP1	-0.558677	58.4946	-2.56258	1.03666	-2.47194	0.0134381	0.636809
4	MICALL2	-0.256846	53.1255	-1.04976	1.01999	-1.02919	0.303392	0.999973
5	SCNN1A	-0.220847	84.5423	-1.38424	0.911214	-1.51911	0.128734	0.999973
