# Supplementary material for: Genome-Wide DNA Methylation and Transcriptome Integration Associates DNA Methylation Changes with Bovine Subclinical Mastitis Caused by Staphylococcus chromogenes
Source: Int J Mol Sci. 2023 Jun 20;24(12):10369. doi: 10.3390/ijms241210369 (PMC10299661; doi:10.3390/ijms241210369)
Supplement: Supplementary file 1 [file ijms-24-10369-s001.zip › TableS13 Sample information and results of target bisulfite amplicon sequencing for two dMHBs discrim-inate signatures in a larger sample size.xlsx]

## Sheet: TableS13A_Cow_infor
Table S13A Sample information of target bisulfite amplicon sequencing for two dMHBs discriminate signatures in a larger sample size
Sample Number	Sample Name	Farm	parity	DIM	SCCx1000	Group	Group2	TD milk Fat	TD milkProt	Milk24kg	Fat24kg	Prot24kg	MUN	Lactose	BHB	Milk24kg	Fat24kg	TD Fat percent	Prot24kg	TD Prot percent	Linear Score	Lab Fat percent	Lab Prot percent	MUN	Lactose percent	BHB	Milk305kg	Fat305kg	Prot305kg
1	9295	Ferland_prelevements	2	262	338	HSCC	HSCC2	MMF	HMP	LMY	LMF	LMP	HMUN	MLAC	MBHB	26.4	1.143	4.33	0.974	3.69	4.8	4.66	3.69	15.6	4.45	0.08	9841	401	339
2	1665	Ferland_prelevements	2	193	848	HSCC	HSCC2	MMF	HMP	MMY	MMF	MMP	MMUN	MLAC	HBHB	33.9	1.436	4.24	1.37	4.04	6.1	4.56	4.04	10.3	4.52	0.09	11705	454	432
3	7187	Ferland_prelevements	3	163	1131	HSCC	HSCC2	LMF	HMP	MMY	LMF	HMP	HMUN	LLAC	HBHB	38.2	1.15	3.01	1.448	3.79	6.5	3.24	3.79	14.2	4.35	0.12	10650	399	396
4	3199	Ferland_prelevements	4	445	1401	HSCC	HSCC2	MMF	MMP	MMY	MMF	MMP	MMUN	LLAC	HBHB	32.4	1.403	4.33	1.147	3.54	6.8	4.66	3.54	12	4.34	0.15	12761	527	437
5	3210	Ferland_prelevements	4	253	1073	HSCC	HSCC1	MMF	HMP	LMY	LMF	LMP	MMUN	LLAC	MBHB	22.2	0.891	4.01	0.899	4.05	6.4	4.32	4.05	11.4	4.37	0.08	8256	307	284
6	8732	Ferland_prelevements	4	69	216	HSCC	HSCC1	LMF	MMP	MMY	LMF	MMP	MMUN	MLAC	MBHB	35.4	1.118	3.16	1.076	3.04	4.1	3.4	3.04	11.9	4.57	0.08	8642	285	277
7	2081	McGill	4	229	245	HSCC	HSCC1	MMF	MMP	HMY	HMF	HMP	MMUN	MLAC	LBHB	48.7	2.084	4.28	1.651	3.39	4.3	4.28	3.39	11.9	4.63	0.04	16514	665	522
8	9047	Ferland_prelevements	4	214	279	HSCC	HSCC1	LMF	MMP	HMY	MMF	HMP	LMUN	MLAC	MBHB	43.4	1.375	3.17	1.411	3.25	4.5	3.41	3.25	8.4	4.54	0.08	14201	457	447
9	3203	Ferland_prelevements	5	59	828	HSCC	HSCC2	MMF	MMP	HMY	HMF	MMP	MMUN	MLAC	HBHB	42.9	1.805	4.21	1.304	3.04	6	4.53	3.04	10.3	4.41	0.14	10157	438	326
10	9476	Ferland_prelevements	5	242	656	HSCC	HSCC2	LMF	HMP	LMY	LMF	LMP	HMUN	LLAC	HBHB	18.7	0.589	3.15	0.673	3.6	5.7	3.39	3.6	16.1	4.29	0.1	9448	301	323
11	3200	Ferland_prelevements	5	73	305	HSCC	HSCC2	LMF	MMP	HMY	MMF	HMP	MMUN	MLAC	MBHB	51.6	1.553	3.01	1.574	3.05	4.6	3.24	3.05	9.6	4.68	0.06	12020	385	381
12	1500	Ferland_prelevements	6	242	2173	HSCC	HSCC2	LMF	MMP	LMY	LMF	MMP	MMUN	MLAC	HBHB	28.9	0.993	3.44	1.029	3.56	7.4	3.7	3.56	11.5	4.59	0.09	12656	460	415
13	2351	MacKinnon	1	362	494	HSCC	HSCC1	MMF	MMP	MMY	MMF	MMP	HMUN	HLAC	HBHB	31	1.32	4.26	1.107	3.57	5.3	4.51	3.57	15.2	4.75	0.09	11907	400	367
14	2326	MacKinnon	1	292	386	HSCC	HSCC1	LMF	MMP	MMY	MMF	MMP	MMUN	MLAC	MBHB	35.9	1.282	3.57	1.163	3.24	4.9	3.43	3.24	13.7	4.49	0.08	12542	428	385
15	2670	MacKinnon	1	33	3216	HSCC	HSCC1	MMF	MMP	LMY	LMF	LMP	MMUN	MLAC	HBHB	29.5	1.096	3.72	0.95	3.22	8	3.57	3.22	10.6	4.61	0.1	7921	303	265
16	2364	MacKinnon	1	286	223	HSCC	HSCC1	HMF	HMP	LMY	MMF	LMP	MMUN	HLAC	MBHB	25.9	1.281	4.95	0.966	3.73	4.2	4.75	3.73	10.3	4.77	0.07	9940	428	342
17	2363	MacKinnon	1	149	1133	HSCC	HSCC2	MMF	MMP	MMY	MMF	MMP	MMUN	MLAC	MBHB	30.4	1.339	4.4	1.07	3.52	6.5	4.23	3.52	9.4	4.62	0.06	9251	393	320
18	2330	MacKinnon	1	437	341	HSCC	HSCC2	MMF	HMP	MMY	MMF	MMP	MMUN	LLAC	MBHB	30.4	1.484	4.88	1.216	4	4.8	4.69	4	9.5	4.39	0.08	10802	434	366
19	2295	MacKinnon	2	236	331	HSCC	HSCC2	LMF	HMP	LMY	LMF	LMP	HMUN	LLAC	HBHB	18.2	0.655	3.6	0.697	3.83	4.7	3.81	3.83	16.9	3.79	0.15	10361	331	332
20	2269	MacKinnon	2	215	681	HSCC	HSCC2	MMF	HMP	MMY	MMF	MMP	HMUN	HLAC	MBHB	33.1	1.247	3.77	1.215	3.67	5.8	3.99	3.67	14.3	4.76	0.08	12243	435	404
21	2332	MacKinnon	2	81	297	HSCC	HSCC1	MMF	LMP	HMY	HMF	HMP	HMUN	MLAC	MBHB	56.3	2.104	3.74	1.666	2.96	4.6	3.59	2.96	14.3	4.51	0.07	14879	594	461
22	3208	MacKinnon	3	224	396	HSCC	HSCC1	LMF	HMP	LMY	LMF	MMP	MMUN	LLAC	HBHB	29.7	1.048	3.53	1.084	3.65	5	3.39	3.65	12.2	3.85	0.16	13665	537	460
23	3188	MacKinnon	3	188	256	HSCC	HSCC1	LMF	MMP	MMY	LMF	MMP	MMUN	LLAC	HBHB	37.8	1.18	3.12	1.225	3.24	4.4	3	3.24	12	4.37	0.1	12091	430	389
24	3484	MacKinnon	3	164	333	HSCC	HSCC1	MMF	HMP	MMY	MMF	MMP	HMUN	LLAC	HBHB	31.2	1.361	4.36	1.151	3.69	4.7	4.19	3.69	17.4	4.36	0.12	10729	470	376
25	3174	MacKinnon	4	179	213	HSCC	HSCC2	HMF	HMP	LMY	MMF	MMP	MMUN	LLAC	MBHB	27.8	1.388	4.99	1.162	4.18	4.1	5.29	4.18	13.8	4.33	0.06	11026	490	389
26	3155	MacKinnon	4	101	789	HSCC	HSCC2	MMF	LMP	HMY	HMF	HMP	MMUN	LLAC	MBHB	48	1.854	3.86	1.426	2.97	6	3.71	2.97	13.2	4.4	0.07	12548	484	392
27	6595	MacKinnon	5	193	2663	HSCC	HSCC2	MMF	HMP	LMY	MMF	MMP	HMUN	LLAC	HBHB	27.8	1.291	4.64	1.162	4.18	7.7	4.92	4.18	14.2	4.18	0.12	9638	413	368
28	6504	MacKinnon	5	38	971	HSCC	HSCC2	LMF	LMP	HMY	HMF	HMP	LMUN	LLAC	HBHB	61.4	1.707	2.78	1.596	2.6	6.3	2.67	2.6	8.9	4.34	0.13	14370	413	397
29	6569	MacKinnon	5	167	370	HSCC	HSCC1	MMF	MMP	HMY	HMF	MMP	MMUN	LLAC	MBHB	40.8	1.724	4.23	1.387	3.4	4.9	4.06	3.4	12.8	4.32	0.08	13720	597	453
30	6630	MacKinnon	5	66	792	HSCC	HSCC1	LMF	MMP	HMY	HMF	HMP	MMUN	MLAC	MBHB	60.1	2.002	3.33	1.947	3.24	6	3.2	3.24	11	4.6	0.06	14517	517	495
31	6503	MacKinnon	6	135	282	HSCC	HSCC1	LMF	MMP	MMY	LMF	MMP	MMUN	LLAC	HBHB	34.6	1.199	3.47	1.052	3.04	4.5	3.33	3.04	13.2	4.26	0.1	10541	399	318
32	2684	MacKinnon	1	398	389	HSCC	HSCC1	HMF	HMP	LMY	LMF	LMP	LMUN	LLAC	MBHB	20.4	1.063	5.21	0.836	4.1	5	5.21	4.1	8	4.17	0.08	8013	382	290
33	2736	MacKinnon	1	234	390	HSCC	HSCC2	MMF	HMP	LMY	MMF	MMP	LMUN	HLAC	LBHB	27.8	1.279	4.6	1.054	3.79	5	4.6	3.79	6.4	4.76	0.04	8171	350	292
34	2747	MacKinnon	1	193	266	HSCC	HSCC2	MMF	HMP	LMY	MMF	MMP	LMUN	MLAC	LBHB	29.5	1.277	4.33	1.118	3.79	4.4	4.33	3.79	6.1	4.54	0.04	9196	382	324
35	2744	MacKinnon	1	201	615	HSCC	HSCC2	MMF	HMP	MMY	MMF	MMP	LMUN	MLAC	LBHB	32.4	1.234	3.81	1.189	3.67	5.6	3.81	3.67	6.6	4.69	0.03	8903	349	312
36	2773	MacKinnon	1	139	233	HSCC	HSCC2	LMF	MMP	LMY	LMF	LMP	LMUN	HLAC	LBHB	25.8	0.9	3.49	0.916	3.55	4.2	3.49	3.55	6.9	4.79	0.03	8288	313	291
37	3444	McGill	3	190	1328	HSCC	HSCC1	HMF	HMP	HMY	HMF	HMP	MMUN	MLAC	LBHB	40	2.136	5.34	1.468	3.67	6.7	5.34	3.67	11	4.54	0.04	12694	611	455
38	2381	MacKinnon	2	265	350	HSCC	HSCC1	HMF	HMP	MMY	MMF	MMP	LMUN	LLAC	LBHB	30.4	1.569	5.16	1.249	4.11	4.8	5.16	4.11	7.7	3.96	0.05	11781	535	439
39	2362	MacKinnon	2	208	214	HSCC	HSCC1	HMF	HMP	LMY	LMF	LMP	LMUN	LLAC	LBHB	17.5	0.872	4.98	0.705	4.03	4.1	4.98	4.03	8.5	4.28	0.05	7112	308	273
40	2389	MacKinnon	2	217	322	HSCC	HSCC1	MMF	HMP	LMY	LMF	MMP	LMUN	MLAC	LBHB	27.8	1.048	3.77	1.07	3.85	4.7	3.77	3.85	4.9	4.57	0.04	11698	424	420
41	2681	MacKinnon	2	60	724	HSCC	HSCC2	LMF	MMP	HMY	HMF	HMP	LMUN	LLAC	HBHB	56.3	2.083	3.7	1.74	3.09	5.9	3.7	3.09	7.8	4.29	0.1	13045	504	427
42	5223	Merveille	1	100	740	HSCC	HSCC2	LMF	MMP	MMY	MMF	MMP	HMUN	MLAC	MBHB	36.6	1.299	3.55	1.157	3.16	5.9	3.55	3.16	14.4	4.6	0.07	10368	382	339
43	2676	MacKinnon	2	58	636	HSCC	HSCC2	LMF	LMP	HMY	HMF	HMP	MMUN	MLAC	HBHB	56.7	1.786	3.15	1.61	2.84	5.7	3.15	2.84	10.3	4.55	0.1	12941	465	387
44	2301	MacKinnon	3	204	1691	HSCC	HSCC2	MMF	MMP	LMY	LMF	LMP	LMUN	LLAC	LBHB	17.7	0.669	3.78	0.62	3.5	7.1	3.78	3.5	8.2	4.08	0.04	6793	277	223
45	2317	MacKinnon	3	122	437	HSCC	HSCC1	MMF	MMP	HMY	HMF	HMP	MMUN	MLAC	MBHB	49.4	1.936	3.92	1.773	3.59	5.1	3.92	3.59	11.6	4.67	0.07	13278	516	477
46	7325	Merveille	3	319	513	HSCC	HSCC1	MMF	HMP	LMY	MMF	MMP	HMUN	HLAC	LBHB	28.4	1.216	4.28	1.059	3.73	5.4	4.28	3.73	17.2	4.84	0.04	12275	461	405
47	4028	Merveille	3	127	373	HSCC	HSCC1	LMF	MMP	HMY	MMF	HMP	MMUN	MLAC	MBHB	46.4	1.462	3.15	1.513	3.26	4.9	3.15	3.26	10.9	4.52	0.07	13354	483	427
48	2338	MacKinnon	3	79	4649	HSCC	HSCC1	LMF	MMP	HMY	HMF	HMP	LMUN	MLAC	HBHB	62.9	2.069	3.29	1.925	3.06	8.5	3.29	3.06	8.8	4.57	0.09	14921	554	470
49	3438	Merveille	5	149	727	HSCC	HSCC2	LMF	MMP	HMY	HMF	HMP	LMUN	MLAC	MBHB	53.7	1.847	3.44	1.724	3.21	5.9	3.44	3.21	8.6	4.49	0.08	14900	532	490
50	3256	MacKinnon	4	118	1031	HSCC	HSCC2	MMF	HMP	LMY	LMF	LMP	LMUN	LLAC	HBHB	25.6	1.034	4.04	0.929	3.63	6.4	4.04	3.63	5	4.24	0.09	8125	274	295
51	3250	MacKinnon	4	119	987	HSCC	HSCC2	LMF	MMP	HMY	HMF	HMP	MMUN	LLAC	HBHB	54.4	2.013	3.7	1.681	3.09	6.3	3.7	3.09	11.9	4.38	0.09	13176	509	426
52	3243	MacKinnon	4	76	1230	HSCC	HSCC2	LMF	LMP	HMY	HMF	HMP	MMUN	MLAC	HBHB	60.1	2.152	3.58	1.659	2.76	6.6	3.58	2.76	9.1	4.49	0.09	14113	532	423
53	3219	MacKinnon	5	59	217	HSCC	HSCC1	LMF	MMP	HMY	HMF	HMP	LMUN	MLAC	MBHB	55.3	1.93	3.49	1.869	3.38	4.1	3.49	3.38	8.4	4.62	0.06	13448	547	478
54	2057	McGill	4	192	244	HSCC	HSCC1	MMF	MMP	HMY	HMF	HMP	MMUN	LLAC	HBHB	47.4	1.759	3.71	1.498	3.16	4.3	3.71	3.16	11.6	4.19	0.11	15207	554	490
55	6294	Riomil	2	97	297	HSCC	HSCC1	MMF	MMP	HMY	HMF	HMP			LBHB	46.5	2.016	4.34	1.491	3.21	4.6	4.37	3.16			0.01	11356	522	363
56	1638	Riomil	2	385	358	HSCC	HSCC1	HMF	HMP	LMY	MMF	LMP			LBHB	21.7	1.501	6.92	0.924	4.26	4.8	6.94	4.16			0.05	12488	615	425
57	8872	Vimo	1	170	281	HSCC	HSCC2	LMF	MMP	MMY	MMF	MMP			MBHB	33.2	1.208	3.64	1.052	3.17	4.5	3.64	3.17			0.06	9492	361	298
58	8838	Vimo	1	365	614	HSCC	HSCC2	LMF	HMP	LMY	LMF	MMP			HBHB	28.4	0.897	3.16	1.037	3.65	5.6	3.16	3.65			0.1	9274	330	302
59	9891	Vimo	2	234	282	HSCC	HSCC2	LMF	MMP	LMY	LMF	LMP			HBHB	14	0.44	3.14	0.445	3.18	4.5	3.14	3.18			0.12	10809	400	350
60	8568	Vimo	2	59	385	HSCC	HSCC2	MMF	MMP	MMY	HMF	MMP			MBHB	39.2	1.69	4.31	1.356	3.46	4.9	4.31	3.46			0.06	9909	444	362
61	8817	Vimo	2	85	1018	HSCC	HSCC1	LMF	MMP	HMY	MMF	MMP			HBHB	44	1.395	3.17	1.351	3.07	6.3	3.17	3.07			0.11	11120	391	366
62	8563	Vimo	2	156	351	HSCC	HSCC1	LMF	MMP	MMY	MMF	MMP			MBHB	37.6	1.306	3.47	1.214	3.23	4.8	3.25	3.23			0.06	11416	418	367
63	8823	Vimo	2	150	258	HSCC	HSCC1	MMF	HMP	LMY	MMF	MMP			MBHB	28.8	1.244	4.32	1.106	3.84	4.4	4.32	3.84			0.07	9080	389	328
64	9906	Vimo	2	152	732	HSCC	HSCC1	LMF	MMP	HMY	MMF	MMP			LBHB	43.2	1.378	3.19	1.361	3.15	5.9	3.19	3.15			0.05	13215	431	406
65	9865	Vimo	2	306	206	HSCC	HSCC2	HMF	HMP	LMY	MMF	LMP			LBHB	25.2	1.315	5.22	0.93	3.69	4	5.22	3.69			0.03	10528	434	351
66	9911	Vimo	2	250	459	HSCC	HSCC2	HMF	HMP	LMY	MMF	LMP			LBHB	23.4	1.271	5.43	0.948	4.05	5.2	5.43	4.05			0.04	10440	437	353
67	9866	Vimo	3	81	235	HSCC	HSCC2	MMF	MMP	MMY	HMF	MMP			LBHB	39.6	1.689	4.27	1.267	3.2	4.2	3.99	3.2			0.02	9885	445	331
68	9827	Vimo	3	93	754	HSCC	HSCC2	LMF	MMP	HMY	HMF	HMP			MBHB	58.3	1.621	2.78	1.836	3.15	5.9	2.78	3.15			0.07	14176	453	468
69	9829	Vimo	3	181	616	HSCC	HSCC1	HMF	MMP	LMY	MMF	LMP			LBHB	23.8	1.216	5.11	0.852	3.58	5.6	5.11	3.58			0.05	9637	414	328
70	37	Vimo	4	119	660	HSCC	HSCC1	LMF	MMP	HMY	MMF	HMP			LBHB	45.8	1.42	3.1	1.479	3.23	5.7	3.1	3.23			0.05	12134	446	400
71	35	Vimo	4	38	301	HSCC	HSCC1	LMF	LMP	HMY	HMF	MMP			MBHB	44.4	1.603	3.61	1.328	2.99	4.6	3.61	2.99			0.07	10506	385	329
72	8514	Vimo	5	125	1326	HSCC	HSCC1	MMF	MMP	MMY	HMF	MMP			MBHB	35.7	1.664	4.66	1.271	3.56	6.7	4.66	3.56			0.06	10667	488	376
73	8482	Vimo	5	199	368	HSCC	HSCC2	MMF	HMP	HMY	HMF	HMP			LBHB	42.3	1.887	4.46	1.574	3.72	4.9	4.46	3.72			0.04	13104	594	450
74	8500	Vimo	5	228	245	HSCC	HSCC2	LMF	HMP	MMY	LMF	MMP			LBHB	30.3	1.088	3.59	1.164	3.84	4.3	3.36	3.84			0.05	11595	417	393
75	8507	Vimo	5	101	221	HSCC	HSCC2	LMF	MMP	HMY	HMF	HMP			LBHB	50.6	1.661	3.28	1.533	3.03	4.1	3.07	3.03			0.04	12848	502	407
76	8534	Vimo	5	138	313	HSCC	HSCC2	MMF	HMP	MMY	MMF	HMP			LBHB	39.8	1.588	3.99	1.437	3.61	4.6	3.99	3.61			0.01	12017	507	427
77	7091	GRainville	3	191	353	HSCC	HSCC1	HMF	HMP	LMY	MMF	LMP	HMUN	LLAC	HBHB	24.7	1.233	4.99	0.946	3.83	4.8	5.25	3.83	17.3	3.75	0.22	10031	476	351
78	7050	GRainville	4	62	948	HSCC	HSCC1	LMF	MMP	HMY	MMF	MMP	MMUN	MLAC	HBHB	40.8	1.451	3.56	1.281	3.14	6.2	3.74	3.14	9.5	4.67	0.11	10098	373	327
79	7095	GRainville	3	169	573	HSCC	HSCC1	MMF	MMP	LMY	LMF	LMP	MMUN	MLAC	HBHB	23.4	1.09	4.66	0.761	3.25	5.5	4.9	3.25	13.8	4.43	0.13	9305	388	306
80	2024	GRainville	1	135	428	HSCC	HSCC1	MMF	MMP	MMY	MMF	MMP	MMUN	HLAC	MBHB	32.3	1.33	4.12	1.16	3.59	5.1	4.33	3.59	11.9	4.8	0.08	9795	398	341
81	5548	GRainville	4	164	2063	HSCC	HSCC2	HMF	HMP	MMY	MMF	MMP	HMUN	MLAC	MBHB	30.1	1.551	5.15	1.18	3.92	7.4	5.42	3.92	14.9	4.51	0.07	10015	514	381
82	5512	GRainville	4	134	1347	HSCC	HSCC2	LMF	MMP	HMY	MMF	HMP	MMUN	HLAC	HBHB	44.3	1.466	3.31	1.471	3.32	6.8	3.48	3.32	9.7	4.85	0.13	11913	418	408
83	8648	Pionald	1	165	244	HSCC	HSCC2	MMF	MMP	LMY	MMF	LMP	LMUN	HLAC	LBHB	26	1.235	4.75	0.892	3.43	4.3	4.75	3.43	8	4.72	0.05	8429	379	275
84	4247	Pionald	2	272	362	HSCC	HSCC2	MMF	HMP	LMY	MMF	MMP	LMUN	HLAC	LBHB	26.8	1.222	4.56	1.043	3.89	4.9	4.56	3.89	7.3	4.75	0.02	13377	511	424
85	1676	Pionald	3	74	421	HSCC	HSCC1	LMF	HMP	MMY	LMF	MMP	LMUN	MLAC	LBHB	36.9	1.14	3.09	1.332	3.61	5.1	3.09	3.61	5.5	4.56	0.03	9133	328	337
86	5665	Pionald	4	90	248	HSCC	HSCC1	MMF	MMP	HMY	HMF	MMP	LMUN	MLAC	HBHB	44.6	1.771	3.97	1.383	3.1	4.3	3.97	3.1	8	4.58	0.11	11487	501	352
87	6947	Pionald	5	52	405	HSCC	HSCC1	MMF	MMP	MMY	MMF	MMP	LMUN	LLAC	MBHB	31.7	1.534	4.84	1.1	3.47	5	4.84	3.47	4.8	4.37	0.06	8019	393	285
88	6937	Pionald	5	50	1943	HSCC	HSCC1	MMF	MMP	HMY	HMF	HMP	LMUN	MLAC	HBHB	50.9	2.158	4.24	1.69	3.32	7.3	4.24	3.32	7.1	4.52	0.09	12058	547	421
89	8383	Pionald	6	36	250	HSCC	HSCC2	MMF	LMP	HMY	HMF	MMP	LMUN	MLAC	HBHB	44.3	2.118	4.78	1.227	2.77	4.3	4.78	2.77	5.9	4.54	0.14	10394	511	303
90	3073	Pionald	6	97	390	HSCC	HSCC2	MMF	MMP	LMY	LMF	LMP	LMUN	MLAC	MBHB	25.1	0.991	3.95	0.821	3.27	5	3.95	3.27	7	4.68	0.07	7579	328	255
91	263	Pionald	6	191	1794	HSCC	HSCC2	MMF	HMP	LMY	LMF	LMP	LMUN	LLAC	HBHB	24.1	1.104	4.58	0.923	3.83	7.2	4.58	3.83	7.9	4.08	0.13	9589	432	354
92	384	société Rainville	1	41	361	HSCC	HSCC2	MMF	MMP	LMY	LMF	LMP	MMUN	HLAC	HBHB	25	1.175	4.7	0.818	3.27	4.9	4.7	3.27	9.4	4.77	0.1	6460	319	223
93	2120	société Rainville	1	166	260	HSCC	HSCC1	MMF	HMP	LMY	MMF	MMP	MMUN	MLAC	LBHB	26.6	1.29	4.85	1.045	3.93	4.4	4.85	3.93	11.1	4.69	0.04	8564	391	325
94	6313	Riomil	2	209	240	HSCC	HSCC1	LMF	HMP	MMY	MMF	MMP			LBHB	36.3	1.317	3.63	1.311	3.61	4.3	3.64	3.59			0.03	12759	491	408
95	8478	société Rainville	2	95	2195	HSCC	HSCC1	MMF	MMP	MMY	HMF	HMP	MMUN	HLAC	HBHB	39.8	1.894	4.76	1.421	3.57	7.5	4.76	3.57	11.4	4.71	0.11	10157	488	369
96	7646	société Rainville	3	214	895	HSCC	HSCC1	MMF	MMP	MMY	MMF	MMP	MMUN	HLAC	LBHB	37.6	1.421	3.78	1.346	3.58	6.2	3.78	3.58	11	4.76	0.05	13143	464	440
97	4852	société Rainville	3	121	431	HSCC	HSCC1	LMF	MMP	HMY	MMF	HMP	MMUN	MLAC	LBHB	51.6	1.491	2.89	1.775	3.44	5.1	2.89	3.44	9.1	4.61	0.04	13662	440	476
98	7899	société Rainville	4	203	356	HSCC	HSCC1	MMF	HMP	MMY	HMF	HMP	MMUN	MLAC	HBHB	37	1.739	4.7	1.473	3.98	4.8	4.7	3.98	11.9	4.67	0.1	13076	587	474
99	5209	Merveille	1	168	412	HSCC	HSCC1	MMF	HMP	MMY	MMF	MMP	HMUN	MLAC	MBHB	30.3	1.345	4.44	1.097	3.62	5	4.44	3.62	14.8	4.55	0.08	9538	421	339
100	5229	Merveille	1	96	604	HSCC	HSCC1	MMF	MMP	MMY	MMF	MMP	MMUN	HLAC	MBHB	36.2	1.553	4.29	1.202	3.32	5.6	4.29	3.32	13.8	4.89	0.07	9477	421	325
101	9304	Ferland_prelevements	2	169	55	LSCC	LSCC	MMF	HMP	HMY	HMF	HMP	HMUN	MLAC	MBHB	43.4	1.738	4	1.593	3.67	2.1	4.31	3.67	14.3	4.57	0.08	12339	472	451
102	1668	Ferland_prelevements	2	229	49	LSCC	LSCC	MMF	MMP	MMY	MMF	MMP	MMUN	MLAC	HBHB	35.2	1.439	4.09	1.186	3.37	2	4.4	3.37	12	4.65	0.1	11620	446	364
103	9299	Ferland_prelevements	2	245	64	LSCC	LSCC	MMF	MMP	MMY	MMF	MMP	MMUN	HLAC	LBHB	31.5	1.299	4.12	1.125	3.57	2.4	4.44	3.57	11.7	4.73	0.05	10742	395	362
104	7058	Ferland_prelevements	3	222	25	LSCC	LSCC	MMF	HMP	MMY	MMF	MMP	MMUN	MLAC	MBHB	32.5	1.44	4.43	1.242	3.82	1	4.77	3.82	13.3	4.53	0.06	11550	464	417
105	8746	Ferland_prelevements	4	150	63	LSCC	LSCC	MMF	HMP	LMY	LMF	MMP	HMUN	LLAC	HBHB	28.5	1.136	3.99	1.032	3.62	2.3	4.29	3.62	17.9	4.11	0.12	9766	388	341
106	8484	Ferland_prelevements	4	173	69	LSCC	LSCC	HMF	HMP	LMY	HMF	MMP	HMUN	LLAC	MBHB	28.4	1.702	5.99	1.11	3.91	2.5	6.45	3.91	15.7	4.39	0.08	9401	430	347
107	9053	Ferland_prelevements	4	123	45	LSCC	LSCC	LMF	HMP	HMY	MMF	HMP	HMUN	MLAC	MBHB	42.2	1.356	3.21	1.612	3.82	1.8	3.46	3.82	15	4.56	0.07	12159	455	441
108	3192	Ferland_prelevements	5	123	9	LSCC	LSCC	MMF	MMP	HMY	HMF	HMP	HMUN	MLAC	MBHB	40	1.78	4.45	1.408	3.52	0.1	4.79	3.52	15.1	4.57	0.07	11140	489	398
109	2381.1	MacKinnon	1	213	44	LSCC	LSCC	HMF	HMP	MMY	MMF	MMP	HMUN	LLAC	HBHB	30.6	1.551	5.07	1.233	4.03	1.8	4.87	4.03	14.6	4.1	0.11	10228	442	373
110	2388	MacKinnon	1	162	29	LSCC	LSCC	MMF	HMP	LMY	MMF	MMP	HMUN	MLAC	MBHB	29.8	1.405	4.71	1.103	3.7	1.2	4.53	3.7	17	4.66	0.08	8751	395	311
111	2390	MacKinnon	1	157	85	LSCC	LSCC	MMF	HMP	LMY	LMF	LMP	HMUN	HLAC	HBHB	26.4	1.195	4.53	0.961	3.64	2.8	4.35	3.64	16.1	4.72	0.1	7873	341	282
112	2657	MacKinnon	1	77	34	LSCC	LSCC	MMF	MMP	MMY	MMF	MMP	MMUN	MLAC	MBHB	37.8	1.503	3.98	1.202	3.18	1.4	3.82	3.18	12.9	4.56	0.07	10054	406	331
113	2378	MacKinnon	1	206	30	LSCC	LSCC	MMF	MMP	MMY	MMF	MMP	LMUN	LLAC	HBHB	35.5	1.378	3.88	1.097	3.09	1.3	3.73	3.09	8.8	4.31	0.12	11240	405	347
114	2306	MacKinnon	2	160	75	LSCC	LSCC	MMF	MMP	LMY	MMF	MMP	HMUN	LLAC	HBHB	28.5	1.219	4.28	1.006	3.53	2.6	4.11	3.53	14	4.36	0.11	10059	409	342
115	2301.1	MacKinnon	2	160	41	LSCC	LSCC	MMF	MMP	LMY	LMF	LMP	HMUN	MLAC	MBHB	23.4	1.03	4.4	0.768	3.28	1.7	4.23	3.28	16.5	4.53	0.07	8032	337	255
116	2288	MacKinnon	2	116	28	LSCC	LSCC	LMF	MMP	HMY	HMF	HMP	MMUN	LLAC	HBHB	49.9	1.777	3.56	1.507	3.02	1.2	3.42	3.02	12.1	4.23	0.09	12999	500	402
117	2310	MacKinnon	2	193	54	LSCC	LSCC	MMF	HMP	LMY	LMF	LMP	MMUN	HLAC	HBHB	24.2	0.907	3.75	0.905	3.74	2.1	3.6	3.74	10.5	4.7	0.09	10544	389	367
118	2333	MacKinnon	2	79	26	LSCC	LSCC	MMF	MMP	HMY	HMF	MMP	MMUN	HLAC	MBHB	42.1	1.604	3.81	1.276	3.03	1.1	3.66	3.03	13	4.84	0.08	10612	431	338
119	3227	MacKinnon	3	154	93	LSCC	LSCC	LMF	LMP	HMY	HMF	HMP	MMUN	LLAC	LBHB	58.2	2.036	3.5	1.688	2.9	2.9	3.36	2.9	13.7	4.31	0.05	16944	573	481
120	2377	MacKinnon	1	125	52	LSCC	LSCC	MMF	HMP	LMY	MMF	MMP	HMUN	MLAC	MBHB	28.7	1.404	4.89	1.065	3.71	2.1	4.7	3.71	17	4.64	0.06	8384	400	307
121	2770	MacKinnon	1	170	34	LSCC	LSCC	LMF	HMP	MMY	LMF	MMP	LMUN	MLAC	LBHB	32.8	1.181	3.6	1.191	3.63	1.4	3.6	3.63	6.3	4.61	0.01	9651	373	338
122	2739	MacKinnon	1	202	65	LSCC	LSCC	HMF	HMP	LMY	LMF	LMP	MMUN	MLAC	LBHB	18.4	0.913	4.96	0.771	4.19	2.4	4.96	4.19	12.5	4.59	0	6058	295	244
123	2277	MacKinnon	3	228	76	LSCC	LSCC	MMF	MMP	HMY	HMF	HMP	LMUN	HLAC	HBHB	41.8	1.831	4.38	1.421	3.4	2.6	4.38	3.4	8.3	4.74	0.1	14669	551	471
124	7184	Vimo	1	101	29	LSCC	LSCC	LMF	MMP	LMY	LMF	LMP			LBHB	24	0.835	3.48	0.833	3.47	1.2	3.48	3.47			0.03	6723	275	234
125	8561	Vimo	2	165	55	LSCC	LSCC	LMF	MMP	HMY	HMF	HMP			MBHB	50.9	1.695	3.33	1.588	3.12	2.1	3.33	3.12			0.07	14070	499	441
126	8569	Vimo	2	131	12	LSCC	LSCC	MMF	MMP	HMY	HMF	HMP			LBHB	46.2	1.894	4.1	1.548	3.35	0.1	4.1	3.35			0.03	12127	508	407
127	9903	Vimo	2	196	59	LSCC	LSCC	LMF	MMP	MMY	LMF	MMP			MBHB	37.2	0.878	2.36	1.276	3.43	2.2	2.36	3.43			0.08	12450	335	410
128	9898	Vimo	2	163	53	LSCC	LSCC	MMF	MMP	HMY	HMF	HMP			LBHB	49.5	2.127	4.3	1.668	3.37	2.1	4.02	3.37			0.02	13569	553	446
129	99	Vimo	3	238	44	LSCC	LSCC	MMF	HMP	LMY	MMF	MMP			LBHB	28.3	1.206	4.26	1.087	3.84	1.8	4.26	3.84			0.04	10467	448	370
130	8531	Vimo	5	143	65	LSCC	LSCC	MMF	MMP	MMY	MMF	MMP			LBHB	38.9	1.486	3.82	1.381	3.55	2.4	3.82	3.55			0.01	11615	501	405
131	8513	Vimo	5	162	23	LSCC	LSCC	MMF	HMP	MMY	MMF	MMP			LBHB	31.5	1.506	4.78	1.2	3.81	0.9	4.78	3.81			0	10813	470	385
132	7177	Vimo	1	115	11	LSCC	LSCC	LMF	MMP	LMY	LMF	LMP			MBHB	29.3	0.99	3.38	0.888	3.03	0.1	3.38	3.03			0.08	8143	316	261
133	7156	Vimo	1	238	65	LSCC	LSCC	LMF	MMP	MMY	LMF	MMP			MBHB	35.8	1.106	3.09	1.224	3.42	2.4	3.09	3.42			0.06	11212	353	364
134	7163	Vimo	1	97	19	LSCC	LSCC	MMF	MMP	HMY	HMF	MMP			LBHB	40.8	1.616	3.96	1.293	3.17	0.6	3.96	3.17			0.05	10453	481	339
135	8867	Vimo	1	207	63	LSCC	LSCC	MMF	MMP	MMY	MMF	MMP			MBHB	34.5	1.352	3.92	1.101	3.19	2.3	3.92	3.19			0.08	10254	411	330
136	8871	Vimo	1	114	44	LSCC	LSCC	MMF	MMP	MMY	HMF	MMP			LBHB	38.9	1.708	4.39	1.33	3.42	1.8	4.39	3.42			0.03	10982	532	381
137	8861	Vimo	1	186	8	LSCC	LSCC	LMF	MMP	HMY	LMF	MMP			MBHB	41	1.152	2.81	1.255	3.06	0.1	2.81	3.06			0.08	11932	364	364
138	7164	Vimo	1	113	13	LSCC	LSCC	LMF	MMP	MMY	LMF	MMP			LBHB	35.9	1.149	3.2	1.109	3.09	0.1	3.2	3.09			0.04	10757	391	339
139	8870	Vimo	1	224	17	LSCC	LSCC	MMF	MMP	MMY	MMF	MMP			LBHB	32.6	1.262	3.87	1.151	3.53	0.4	3.87	3.53			0.05	9878	389	327
140	7148	Vimo	1	230	30	LSCC	LSCC	LMF	MMP	MMY	MMF	MMP			MBHB	39.4	1.414	3.59	1.332	3.38	1.3	3.59	3.38			0.08	11640	414	388
141	8859	Vimo	1	238	92	LSCC	LSCC	MMF	MMP	MMY	MMF	LMP			HBHB	30.5	1.235	4.05	0.982	3.22	2.9	4.05	3.22			0.09	9974	342	310
142	31	Vimo	4	132	97	LSCC	LSCC	MMF	MMP	MMY	HMF	MMP			LBHB	37.5	1.718	4.58	1.26	3.36	3	4.58	3.36			0.02	10333	487	345
143	7068	GRainville	3	164	31	LSCC	LSCC	MMF	MMP	MMY	MMF	MMP	MMUN	LLAC	HBHB	34.8	1.479	4.25	1.215	3.49	1.3	4.47	3.49	12.7	4.2	0.14	10377	445	352
144	7071	GRainville	3	228	65	LSCC	LSCC	MMF	MMP	HMY	HMF	MMP	MMUN	MLAC	HBHB	40.6	1.911	4.71	1.38	3.4	0.6	4.95	3.4	12.7	4.5	0.19	12140	548	394
145	2026	GRainville	1	157	13	LSCC	LSCC	MMF	MMP	LMY	LMF	LMP	HMUN	MLAC	HBHB	28.4	1.105	3.89	0.943	3.32	0.1	4.09	3.32	14.2	4.48	0.09	8355	338	280
146	7254	GRainville	2	110	17	LSCC	LSCC	MMF	HMP	HMY	HMF	HMP	MMUN	HLAC	HBHB	42.8	2.072	4.84	1.584	3.7	0.4	5.09	3.7	11.2	4.74	0.09	10549	575	372
147	2023	GRainville	1	223	28	LSCC	LSCC	MMF	MMP	MMY	MMF	MMP	MMUN	HLAC	HBHB	32.6	1.299	3.98	1.148	3.52	1.2	4.19	3.52	12.2	4.77	0.1	10346	391	341
148	2021	GRainville	1	146	39	LSCC	LSCC	MMF	MMP	MMY	MMF	MMP	MMUN	HLAC	HBHB	31.7	1.263	3.98	1.052	3.32	1.6	4.19	3.32	12.8	4.77	0.13	9237	369	300
149	3124	Pionald	1	151	12	LSCC	LSCC	MMF	MMP	MMY	LMF	MMP	LMUN	HLAC	MBHB	31.5	1.2	3.81	1.03	3.27	0.1	3.81	3.27	7.3	4.83	0.07	9299	359	305
150	4510	Pionald	4	217	55	LSCC	LSCC	MMF	MMP	MMY	HMF	HMP	LMUN	MLAC	MBHB	39.5	1.781	4.51	1.406	3.56	2.1	4.51	3.56	5.3	4.62	0.08	13292	607	446
151	5413	Pionald	4	86	56	LSCC	LSCC	MMF	MMP	MMY	MMF	MMP	LMUN	LLAC	LBHB	38.3	1.421	3.71	1.275	3.33	2.2	3.71	3.33	8.4	4.09	0.05	11046	401	367
152	8502	société Rainville	1	226	27	LSCC	LSCC	MMF	MMP	HMY	HMF	HMP	MMUN	HLAC	MBHB	42.4	1.721	4.06	1.454	3.43	1.1	4.06	3.43	12.4	4.83	0.08	12527	476	411
153	8503	société Rainville	1	129	11	LSCC	LSCC	MMF	MMP	HMY	MMF	MMP	MMUN	HLAC	MBHB	40.6	1.575	3.88	1.295	3.19	0.1	3.88	3.19	12.3	4.84	0.07	11754	474	374
154	2118	société Rainville	1	126	61	LSCC	LSCC	MMF	MMP	HMY	MMF	HMP	MMUN	HLAC	HBHB	42.2	1.583	3.75	1.426	3.38	2.3	3.75	3.38	12.5	4.8	0.1	12121	477	411
155	2125	société Rainville	1	113	15	LSCC	LSCC	MMF	MMP	MMY	MMF	MMP	MMUN	HLAC	MBHB	35.4	1.458	4.12	1.193	3.37	0.3	4.12	3.37	9.2	4.86	0.08	9867	410	334
156	505	société Rainville	2	245	19	LSCC	LSCC	MMF	HMP	MMY	MMF	MMP	LMUN	MLAC	MBHB	31.8	1.418	4.46	1.173	3.69	0.6	4.46	3.69	8.8	4.65	0.07	12474	499	410
157	9506	société Rainville	2	244	38	LSCC	LSCC	LMF	HMP	HMY	MMF	HMP	LMUN	HLAC	MBHB	43.4	1.532	3.53	1.61	3.71	1.6	3.53	3.71	8	4.78	0.07	13962	448	481
158	9518	société Rainville	2	161	13	LSCC	LSCC	MMF	HMP	MMY	HMF	MMP	MMUN	HLAC	MBHB	36	1.696	4.71	1.3	3.61	0.1	4.71	3.61	10	4.71	0.08	11190	503	394
159	5105	société Rainville	4	222	47	LSCC	LSCC	MMF	HMP	LMY	MMF	MMP	MMUN	LLAC	MBHB	29.2	1.399	4.79	1.238	4.24	1.9	4.79	4.24	10.9	4.39	0.06	10800	446	411
160	7616	société Rainville	4	76	18	LSCC	LSCC	MMF	HMP	HMY	HMF	HMP	MMUN	MLAC	HBHB	44.4	1.967	4.43	1.598	3.6	0.5	4.43	3.6	9.1	4.59	0.1	11026	503	411
161	5218	Merveille	1	217	36	LSCC	LSCC	LMF	MMP	MMY	LMF	LMP	MMUN	MLAC	MBHB	30.7	1.105	3.6	0.989	3.22	1.5	3.6	3.22	12.2	4.64	0.07	9015	324	287
162	5216	Merveille	1	154	25	LSCC	LSCC	MMF	MMP	MMY	MMF	MMP	MMUN	MLAC	MBHB	33.9	1.427	4.21	1.193	3.52	1	4.21	3.52	11.8	4.69	0.08	9496	394	334
163	5213	Merveille	1	98	21	LSCC	LSCC	LMF	MMP	HMY	MMF	MMP	MMUN	MLAC	HBHB	41.8	1.459	3.49	1.258	3.01	0.7	3.49	3.01	9.7	4.63	0.09	11567	419	365
164	7323	Merveille	3	126	18	LSCC	LSCC	LMF	MMP	HMY	HMF	HMP	HMUN	MLAC	LBHB	52	1.872	3.6	1.747	3.36	0.5	3.6	3.36	15.8	4.68	0.04	14605	529	481
165	7976	Riomil	2	110	43	LSCC	LSCC	MMF	MMP	MMY	MMF	MMP			LBHB	36.2	1.482	4.09	1.196	3.3	1.8	4.1	3.24			0.05	9891	404	313
166	7977	Riomil	2	102	96	LSCC	LSCC	MMF	MMP	LMY	MMF	MMP			LBHB	29.1	1.354	4.65	1.016	3.49	2.9	4.62	3.37			0	7882	349	269
167	9102	Riomil	2	110	49	LSCC	LSCC	LMF	MMP	HMY	MMF	HMP			LBHB	47.1	1.591	3.38	1.603	3.4	2	3.4	3.39			0.05	12403	445	416
168	8249	Ferland_prelevements	1	168	24	LSCC	LSCC	MMF	MMP	MMY	MMF	MMP	HMUN	HLAC	HBHB	31.5	1.22	3.87	1.04	3.3	0.9	4.17	3.3	15	4.76	0.1	9692	366	311
169	2494	Ferland_prelevements	1	213	21	LSCC	LSCC	MMF	HMP	LMY	LMF	LMP	HMUN	HLAC	HBHB	25	1.059	4.24	0.918	3.67	0.7	4.56	3.67	14.3	4.72	0.12	8509	362	294
170	2495	Ferland_prelevements	1	158	26	LSCC	LSCC	MMF	HMP	LMY	MMF	MMP	HMUN	HLAC	MBHB	28	1.204	4.3	1.016	3.63	1.1	4.63	3.63	14.3	4.74	0.07	8410	359	297
171	9291	Ferland_prelevements	2	271	68	LSCC	LSCC	MMF	HMP	LMY	LMF	LMP	HMUN	LLAC	HBHB	25.7	1	3.89	0.946	3.68	2.4	4.19	3.68	14.6	4.38	0.11	12568	442	423
172	9297	Ferland_prelevements	2	270	25	LSCC	LSCC	MMF	HMP	MMY	MMF	MMP	HMUN	MLAC	MBHB	33.7	1.459	4.33	1.237	3.67	1	4.66	3.67	14.3	4.66	0.06	12189	472	392
173	8617	Riomil	1	244	48	LSCC	LSCC	MMF	MMP	LMY	MMF	LMP			LBHB	26.9	1.26	4.68	0.944	3.51	1.9	4.71	3.44			0.04	8580	382	275
174	3091	Riomil	1	245	34	LSCC	LSCC	MMF	HMP	MMY	HMF	HMP			LBHB	39.6	1.704	4.3	1.433	3.62	1.4	4.33	3.58			0.04	12590	494	410
175	1632	Riomil	3	194	59	LSCC	LSCC	HMF	HMP	MMY	HMF	MMP			LBHB	35.4	1.809	5.11	1.366	3.86	2.2	5.13	3.81			0.04	11306	517	388
176	1604	Riomil	3	229	48	LSCC	LSCC	MMF	MMP	MMY	HMF	MMP			MBHB	38.6	1.65	4.27	1.326	3.44	1.9	4.34	3.43			0.06	11267	454	349
177	8447	Riomil	3	221	27	LSCC	LSCC	HMF	HMP	HMY	HMF	HMP			LBHB	45.7	2.425	5.31	1.795	3.93	1.1	5.38	3.93			0.04	14513	625	494
178	8498	société Rainville	1	180	40	LSCC	LSCC	MMF	HMP	LMY	MMF	MMP	LMUN	HLAC	HBHB	30	1.44	4.8	1.191	3.97	1.7	4.8	3.97	9	4.71	0.09	9935	443	381
179	2123	société Rainville	1	133	11	LSCC	LSCC	MMF	HMP	LMY	MMF	LMP	MMUN	MLAC	HBHB	27	1.291	4.78	0.977	3.62	0.1	4.78	3.62	9.5	4.67	0.11	8437	395	301
180	9514	société Rainville	2	104	7	LSCC	LSCC	MMF	HMP	HMY	HMF	HMP	LMUN	HLAC	MBHB	50	1.87	3.74	1.84	3.68	0.1	3.74	3.68	7.9	4.76	0.08	13131	539	492
181	8470	société Rainville	2	102	9	LSCC	LSCC	LMF	MMP	HMY	MMF	HMP	MMUN	MLAC	HBHB	54.2	1.599	2.95	1.648	3.04	0.1	2.95	3.04	13	4.42	0.13	13259	423	419
182	9497	société Rainville	2	126	7	LSCC	LSCC	MMF	HMP	HMY	MMF	HMP	MMUN	MLAC	LBHB	40.8	1.595	3.91	1.506	3.69	0.1	3.91	3.69	10.1	4.67	0.01	11667	457	427
183	5179	société Rainville	4	190	84	LSCC	LSCC	MMF	HMP	HMY	HMF	HMP	HMUN	MLAC	MBHB	41.8	1.726	4.13	1.505	3.6	2.7	4.13	3.6	15.8	4.54	0.08	13990	531	484
184	2735	société Rainville	5	196	73	LSCC	LSCC	LMF	MMP	HMY	HMF	HMP	MMUN	MLAC	MBHB	48.6	1.779	3.66	1.725	3.55	2.5	3.66	3.55	10	4.65	0.07	14338	500	492
185	2370	société Rainville	6	119	19	LSCC	LSCC	LMF	HMP	HMY	HMF	HMP	MMUN	MLAC	LBHB	45.6	1.664	3.65	1.674	3.67	0.6	3.65	3.67	9.2	4.66	0.03	11903	455	431
186	5219	Merveille	1	235	12	LSCC	LSCC	LMF	MMP	MMY	LMF	MMP	HMUN	HLAC	MBHB	33.9	1.109	3.27	1.119	3.3	0.1	3.27	3.3	16.9	4.85	0.08	10766	316	341
187	5222	Merveille	1	197	19	LSCC	LSCC	MMF	MMP	HMY	HMF	HMP	HMUN	HLAC	HBHB	47.6	1.852	3.89	1.585	3.33	0.6	3.89	3.33	15	4.7	0.1	12595	463	404
188	5224	Merveille	1	159	15	LSCC	LSCC	MMF	MMP	LMY	MMF	MMP	HMUN	MLAC	MBHB	30	1.233	4.11	1.047	3.49	0.3	4.11	3.49	14.2	4.62	0.07	8996	372	309
189	5211	Merveille	1	149	79	LSCC	LSCC	MMF	HMP	MMY	MMF	MMP	MMUN	MLAC	MBHB	34.5	1.484	4.3	1.249	3.62	2.7	4.3	3.62	11.4	4.44	0.08	9848	420	355
190	5227	Merveille	1	96	47	LSCC	LSCC	MMF	LMP	MMY	MMF	MMP	HMUN	MLAC	HBHB	38.4	1.536	4	1.148	2.99	1.9	4	2.99	14.1	4.61	0.09	10694	440	330
191	5221	Merveille	1	250	54	LSCC	LSCC	MMF	HMP	LMY	MMF	MMP	HMUN	LLAC	MBHB	29.6	1.373	4.64	1.104	3.73	2.1	4.64	3.73	14.5	4.38	0.08	10526	455	359
192	4027	Merveille	2	245	13	LSCC	LSCC	MMF	MMP	MMY	HMF	MMP	HMUN	MLAC	MBHB	36.2	1.6	4.42	1.296	3.58	0.1	4.42	3.58	14.5	4.6	0.08	13069	482	421
193	4029	Merveille	2	223	16	LSCC	LSCC	MMF	HMP	MMY	MMF	MMP	HMUN	MLAC	MBHB	35.2	1.475	4.19	1.394	3.96	0.4	4.19	3.96	15.2	4.57	0.07	12707	463	434
194	4028.1	Merveille	2	191	33	LSCC	LSCC	MMF	HMP	MMY	MMF	MMP	HMUN	LLAC	MBHB	32.7	1.53	4.68	1.272	3.89	1.4	4.68	3.89	15.4	4.4	0.06	10170	436	368
195	7330	Merveille	3	136	81	LSCC	LSCC	LMF	MMP	HMY	HMF	HMP	HMUN	MLAC	MBHB	47.4	1.702	3.59	1.559	3.29	2.7	3.59	3.29	14	4.56	0.08	13201	473	434
196	3697	Merveille	2	197	33	LSCC	LSCC	MMF	MMP	HMY	HMF	HMP	HMUN	HLAC	MBHB	45.3	1.703	3.76	1.477	3.26	1.4	3.76	3.26	14.3	4.85	0.07	14150	504	450
197	5215	Merveille	1	182	15	LSCC	LSCC	MMF	MMP	HMY	HMF	MMP	MMUN	HLAC	MBHB	40.5	1.656	4.09	1.361	3.36	0.3	4.09	3.36	13.1	4.76	0.06	12083	473	399
198	8505	McGill	2	213	22	LSCC	LSCC	MMF	MMP	HMY	HMF	HMP	MMUN	MLAC	MBHB	44.2	1.653	3.74	1.459	3.3	0.8	3.74	3.3	9.1	4.69	0.07	14610	529	472
199	8063	McGill	1	224	12	LSCC	LSCC	MMF	HMP	LMY	MMF	MMP	MMUN	HLAC	MBHB	27.3	1.278	4.68	1.037	3.8	0.1	4.68	3.8	11.1	4.72	0.07	8820	388	317
200	8074	McGill	1	108	86	LSCC	LSCC	MMF	MMP	HMY	HMF	MMP	HMUN	HLAC	MBHB	40.9	1.607	3.93	1.252	3.06	2.8	3.93	3.06	15.3	4.7	0.08	11146	456	347

## Sheet: TableS13B_Primer
Table S13B primiers of target bisulfite amplicon sequencing for two dMHBs discrim-inate signatures in a larger sample size
GE-dMHB				overlapped gene	Sequencing region					forward primters	reverse primers
Chromosome	start	end	width		Chromosome	start	end	width	number of CpG sites
chr18	46457156	46457205	50 bp	IGFLR1	chr18	46457063	46457270	208	7	TATTGGGAAGTTAAGGGAATTTTGAG	TTCCCTATAACTCTAACCCTCCTCTC
chr3	103394243	103394433	191	ZNF691	chr3	103394255	103394484	230	4	GGTTATTAATTTTAGAAATTGTTATGTAAGTGTAG	AAACTACTTATCCCTAAACTCTTCAAAA
			U2AF1L4 tested all 7 DMCs in the dMHB, no extend.
			ZNF691 missed the first DMC in dMHB (103394247), extend two CpG sites at the downstream (103394401 and 103394427)

## Sheet: TableS13C_CpG methylation level
Table S13C methylation level of CpG sites in two dMHBs discriminate signaturesdetected by target bisulfite amplicon sequencing in a larger sample size
seq	Group	IGFLR1	IGFLR1	IGFLR1	IGFLR1	IGFLR1	IGFLR1	IGFLR1	ZNF691	ZNF691	ZNF691	ZNF691
pos		106	115	130	133	136	148	154	164	185	259	285
chr		chr18	chr18	chr18	chr18	chr18	chr18	chr18	chr3	chr3	chr3	chr3
pos		46457156	46457165	46457180	46457183	46457186	46457198	46457204	103394306	103394327	103394401	103394427
9295	HSCC2	0.456	0.722	0.742	0.673	0.725	0.689	0.718	0.293	0.262	0.335	0.368
1665	HSCC2	0.4	0.637	0.655	0.597	0.639	0.619	0.64	0.388	0.331	0.456	0.468
7187	HSCC2	0.347	0.545	0.561	0.512	0.548	0.532	0.552	0.486	0.412	0.565	0.556
3199	HSCC2	0.511	0.79	0.819	0.745	0.8	0.77	0.796	0.321	0.275	0.38	0.437
3210	HSCC1	0.031	0.062	0.062	0.045	0.06	0.074	0.056	0.754	0.662	0.942	0.801
8732	HSCC1	0.115	0.179	0.188	0.161	0.185	0.211	0.197	0.81	0.762	0.907	0.766
2081	HSCC1	0.034	0.052	0.056	0.044	0.057	0.076	0.06	0.748	0.613	0.956	0.815
9047	HSCC1	0.046	0.066	0.069	0.059	0.068	0.091	0.067	0.792	0.672	0.939	0.819
3203	HSCC2	0.477	0.748	0.772	0.7	0.752	0.719	0.749	0.251	0.213	0.29	0.33
9476	HSCC2	0.47	0.741	0.762	0.695	0.742	0.71	0.742	0.267	0.238	0.309	0.348
3200	HSCC2	0.413	0.645	0.662	0.604	0.648	0.626	0.644	0.407	0.358	0.485	0.476
1500	HSCC2	0.523	0.809	0.836	0.766	0.815	0.79	0.807	0.359	0.299	0.417	0.477
2351	HSCC1	0.023	0.043	0.047	0.034	0.05	0.064	0.042	0.825	0.695	0.962	0.831
2326	HSCC1	0.03	0.053	0.053	0.043	0.058	0.074	0.055	0.772	0.647	0.949	0.806
2670	HSCC1	0.02	0.032	0.037	0.024	0.036	0.057	0.036	0.815	0.67	0.972	0.858
2364	HSCC1	0.054	0.083	0.087	0.074	0.088	0.109	0.092	0.817	0.703	0.942	0.852
2363	HSCC2	0.461	0.727	0.75	0.682	0.732	0.697	0.726	0.29	0.254	0.33	0.354
2330	HSCC2	0.459	0.723	0.747	0.679	0.727	0.692	0.722	0.293	0.262	0.342	0.372
2295	HSCC2	0.447	0.706	0.722	0.658	0.707	0.67	0.703	0.328	0.299	0.364	0.403
2269	HSCC2	0.512	0.788	0.814	0.74	0.796	0.76	0.787	0.425	0.381	0.515	0.491
2332	HSCC1	0.042	0.074	0.088	0.056	0.098	0.116	0.082	0.812	0.711	0.955	0.826
3208	HSCC1	0.037	0.065	0.079	0.05	0.08	0.096	0.07	0.831	0.763	0.945	0.806
3188	HSCC1	0.025	0.039	0.043	0.029	0.042	0.064	0.036	0.865	0.771	0.94	0.794
3484	HSCC1	0.023	0.039	0.049	0.031	0.042	0.064	0.045	0.82	0.715	0.946	0.852
3174	HSCC2	0.464	0.734	0.754	0.685	0.733	0.708	0.732	0.248	0.216	0.284	0.336
3155	HSCC2	0.451	0.719	0.743	0.674	0.724	0.696	0.72	0.303	0.267	0.348	0.378
6595	HSCC2	0.372	0.585	0.605	0.548	0.593	0.576	0.595	0.405	0.358	0.473	0.47
6504	HSCC2	0.515	0.798	0.824	0.753	0.804	0.776	0.797	0.32	0.282	0.32	0.32
6569	HSCC1	0.036	0.061	0.062	0.052	0.062	0.08	0.064	0.794	0.705	0.949	0.827
6630	HSCC1	0.023	0.039	0.046	0.03	0.042	0.058	0.036	0.808	0.691	0.966	0.849
6503	HSCC1	0.033	0.057	0.063	0.044	0.065	0.087	0.064	0.84	0.691	0.96	0.849
2684	HSCC1	0.046	0.071	0.07	0.06	0.071	0.085	0.077	0.8	0.698	0.953	0.845
2736	HSCC2	0.474	0.74	0.764	0.691	0.743	0.714	0.738	0.263	0.238	0.291	0.335
2747	HSCC2	0.46	0.724	0.746	0.679	0.728	0.696	0.722	0.308	0.27	0.344	0.359
2744	HSCC2	0.406	0.643	0.661	0.6	0.643	0.616	0.637	0.406	0.358	0.468	0.468
2773	HSCC2	0.51	0.793	0.818	0.744	0.802	0.766	0.795	0.227	0.237	0.302	0.351
3444	HSCC1	0.033	0.055	0.057	0.046	0.062	0.078	0.058	0.789	0.64	0.95	0.837
2381	HSCC1	0.044	0.071	0.074	0.059	0.074	0.092	0.076	0.784	0.644	0.948	0.792
2362	HSCC1	0.145	0.216	0.221	0.196	0.213	0.23	0.23	0.763	0.676	0.825	0.681
2389	HSCC1	0.044	0.063	0.069	0.053	0.065	0.084	0.067	0.818	0.704	0.942	0.825
2681	HSCC2	0.463	0.73	0.751	0.683	0.733	0.7	0.727	0.249	0.223	0.286	0.327
5223	HSCC2	0.469	0.738	0.76	0.692	0.74	0.705	0.734	0.267	0.234	0.297	0.337
2676	HSCC2	0.435	0.689	0.708	0.645	0.691	0.666	0.692	0.281	0.255	0.32	0.361
2301	HSCC2	0.487	0.77	0.796	0.724	0.777	0.751	0.774	0.254	0.232	0.292	0.317
2317	HSCC1	0.052	0.085	0.086	0.07	0.089	0.109	0.085	0.782	0.654	0.956	0.811
7325	HSCC1	0.04	0.069	0.076	0.056	0.074	0.101	0.073	0.779	0.676	0.949	0.82
4028	HSCC1	0.025	0.044	0.048	0.033	0.048	0.072	0.045	0.807	0.666	0.962	0.836
2338	HSCC1	0.027	0.043	0.043	0.037	0.044	0.061	0.043	0.756	0.648	0.96	0.809
3438	HSCC2	0.45	0.71	0.732	0.664	0.712	0.677	0.708	0.289	0.257	0.34	0.368
3256	HSCC2	0.41	0.651	0.67	0.608	0.653	0.627	0.652	0.349	0.301	0.415	0.429
3250	HSCC2	0.407	0.646	0.662	0.604	0.645	0.62	0.643	0.373	0.329	0.449	0.452
3243	HSCC2	0.498	0.778	0.805	0.731	0.786	0.75	0.779	0.219	0.211	0.264	0.307
3219	HSCC1	0.036	0.061	0.062	0.051	0.065	0.086	0.064	0.774	0.625	0.958	0.82
2057	HSCC1	0.045	0.073	0.08	0.064	0.076	0.091	0.076	0.751	0.624	0.935	0.793
6294	HSCC1	0.03	0.046	0.048	0.039	0.052	0.071	0.047	0.789	0.65	0.961	0.837
1638	HSCC1	0.05	0.08	0.085	0.068	0.079	0.098	0.085	0.795	0.679	0.939	0.818
8872	HSCC2	0.461	0.729	0.752	0.681	0.732	0.696	0.726	0.248	0.225	0.287	0.328
8838	HSCC2	0.429	0.685	0.704	0.638	0.686	0.659	0.686	0.308	0.275	0.357	0.378
9891	HSCC2	0.397	0.625	0.644	0.586	0.626	0.609	0.628	0.452	0.422	0.492	0.466
8568	HSCC2	0.5	0.776	0.802	0.726	0.785	0.751	0.772	0.259	0.224	0.304	0.331
8817	HSCC1	0.027	0.044	0.046	0.036	0.043	0.066	0.041	0.823	0.713	0.964	0.814
8563	HSCC1	0.034	0.052	0.06	0.045	0.057	0.082	0.058	0.799	0.706	0.934	0.775
8823	HSCC1	0.061	0.098	0.105	0.086	0.106	0.125	0.106	0.835	0.768	0.939	0.798
9906	HSCC1	0.027	0.047	0.046	0.037	0.05	0.067	0.047	0.814	0.681	0.963	0.854
9865	HSCC2	0.467	0.739	0.763	0.694	0.743	0.707	0.736	0.258	0.229	0.293	0.331
9911	HSCC2	0.466	0.738	0.76	0.69	0.741	0.704	0.734	0.247	0.224	0.278	0.314
9866	HSCC2	0.372	0.589	0.608	0.556	0.592	0.574	0.591	0.291	0.258	0.317	0.352
9827	HSCC2	0.487	0.754	0.779	0.708	0.757	0.734	0.759	0.412	0.366	0.491	0.479
9829	HSCC1	0.027	0.05	0.054	0.041	0.056	0.077	0.051	0.773	0.662	0.954	0.849
37	HSCC1	0.025	0.04	0.04	0.032	0.04	0.067	0.04	0.821	0.67	0.972	0.879
35	HSCC1	0.038	0.061	0.063	0.054	0.067	0.09	0.066	0.774	0.625	0.959	0.816
8514	HSCC1	0.032	0.051	0.058	0.043	0.065	0.091	0.058	0.818	0.706	0.96	0.864
8482	HSCC2	0.462	0.735	0.756	0.688	0.738	0.703	0.731	0.255	0.224	0.278	0.33
8500	HSCC2	0.461	0.731	0.753	0.686	0.734	0.702	0.733	0.236	0.214	0.268	0.312
8507	HSCC2	0.448	0.713	0.734	0.669	0.714	0.689	0.711	0.239	0.212	0.266	0.288
8534	HSCC2	0.508	0.79	0.819	0.745	0.799	0.768	0.786	0.289	0.259	0.355	0.383
7091	HSCC1	0.142	0.22	0.224	0.193	0.227	0.24	0.24	0.711	0.624	0.833	0.713
7050	HSCC1	0.106	0.163	0.168	0.145	0.166	0.191	0.176	0.749	0.641	0.901	0.812
7095	HSCC1	0.027	0.046	0.045	0.037	0.044	0.067	0.045	0.803	0.66	0.952	0.829
2024	HSCC1	0.049	0.072	0.081	0.068	0.08	0.099	0.078	0.809	0.667	0.958	0.835
5548	HSCC2	0.476	0.752	0.775	0.705	0.755	0.723	0.75	0.241	0.213	0.272	0.319
5512	HSCC2	0.484	0.768	0.791	0.719	0.771	0.738	0.766	0.226	0.204	0.261	0.302
8648	HSCC2	0.41	0.647	0.666	0.609	0.651	0.629	0.652	0.359	0.323	0.436	0.444
4247	HSCC2	0.512	0.796	0.823	0.748	0.803	0.773	0.796	0.298	0.256	0.348	0.374
1676	HSCC1	0.05	0.078	0.085	0.072	0.09	0.107	0.088	0.748	0.647	0.938	0.808
5665	HSCC1	0.05	0.075	0.081	0.07	0.08	0.101	0.082	0.839	0.682	0.961	0.847
6947	HSCC1	0.075	0.125	0.133	0.115	0.128	0.15	0.135	0.737	0.667	0.91	0.756
6937	HSCC1	0.02	0.035	0.037	0.027	0.035	0.058	0.033	0.727	0.594	0.959	0.804
8383	HSCC2	0.484	0.765	0.788	0.717	0.766	0.727	0.758	0.235	0.21	0.265	0.251
3073	HSCC2	0.456	0.717	0.739	0.672	0.721	0.69	0.713	0.26	0.235	0.299	0.334
263	HSCC2	0.396	0.63	0.65	0.589	0.635	0.616	0.635	0.313	0.282	0.368	0.401
384	HSCC2	0.506	0.794	0.822	0.75	0.801	0.774	0.792	0.302	0.298	0.389	0.391
2120	HSCC1	0.303	0.411	0.416	0.383	0.407	0.435	0.438	0.623	0.544	0.709	0.583
6313	HSCC1	0.066	0.1	0.103	0.081	0.116	0.125	0.111	0.801	0.68	0.929	0.828
8478	HSCC1	0.017	0.033	0.035	0.026	0.037	0.053	0.033	0.727	0.621	0.972	0.841
7646	HSCC1	0.024	0.043	0.042	0.03	0.043	0.07	0.04	0.785	0.633	0.968	0.859
4852	HSCC1	0.208	0.282	0.292	0.266	0.289	0.307	0.302	0.699	0.619	0.802	0.712
7899	HSCC1	0.03	0.049	0.053	0.044	0.053	0.074	0.054	0.766	0.634	0.969	0.891
5209	HSCC1	0.035	0.056	0.055	0.051	0.058	0.071	0.058	0.746	0.622	0.953	0.852
5229	HSCC1	0.023	0.041	0.045	0.035	0.046	0.066	0.044	0.788	0.659	0.964	0.887
9304	LSCC	0.202	0.301	0.311	0.277	0.305	0.323	0.319	0.694	0.599	0.776	0.69
1668	LSCC	0.134	0.191	0.196	0.173	0.201	0.218	0.212	0.816	0.694	0.922	0.836
9299	LSCC	0.125	0.187	0.191	0.175	0.188	0.203	0.199	0.737	0.627	0.873	0.782
7058	LSCC	0.24	0.382	0.392	0.347	0.379	0.4	0.401	0.637	0.581	0.723	0.642
8746	LSCC	0.265	0.403	0.41	0.366	0.399	0.419	0.429	0.643	0.566	0.712	0.643
8484	LSCC	0.262	0.425	0.444	0.392	0.431	0.446	0.443	0.637	0.576	0.686	0.616
9053	LSCC	0.202	0.308	0.313	0.285	0.309	0.338	0.337	0.635	0.533	0.76	0.661
3192	LSCC	0.254	0.438	0.45	0.412	0.437	0.441	0.46	0.565	0.516	0.636	0.585
2381.1	LSCC	0.051	0.082	0.086	0.068	0.093	0.115	0.088	0.777	0.705	0.935	0.823
2388	LSCC	0.321	0.486	0.502	0.464	0.491	0.486	0.511	0.531	0.518	0.577	0.524
2390	LSCC	0.107	0.155	0.155	0.139	0.156	0.176	0.167	0.741	0.643	0.91	0.833
2657	LSCC	0.643	0.898	0.91	0.829	0.893	0.837	0.88	0.247	0.18	0.263	0.281
2378	LSCC	0.184	0.25	0.267	0.225	0.262	0.281	0.277	0.729	0.67	0.833	0.73
2306	LSCC	0.169	0.259	0.268	0.237	0.258	0.279	0.276	0.744	0.718	0.799	0.686
2301.1	LSCC	0.242	0.367	0.372	0.347	0.363	0.38	0.381	0.644	0.589	0.711	0.623
2288	LSCC	0.226	0.353	0.365	0.323	0.355	0.344	0.375	0.651	0.619	0.74	0.664
2310	LSCC	0.141	0.209	0.221	0.19	0.214	0.228	0.231	0.69	0.6	0.844	0.741
2333	LSCC	0.157	0.226	0.232	0.208	0.228	0.242	0.236	0.779	0.735	0.863	0.764
3227	LSCC	0.07	0.105	0.112	0.095	0.11	0.13	0.114	0.778	0.659	0.91	0.789
2377	LSCC	0.234	0.323	0.336	0.304	0.329	0.35	0.354	0.643	0.576	0.733	0.666
2770	LSCC	0.108	0.161	0.164	0.147	0.162	0.174	0.175	0.823	0.771	0.909	0.839
2739	LSCC	0.145	0.205	0.215	0.188	0.212	0.231	0.228	0.717	0.614	0.854	0.758
2277	LSCC	0.093	0.142	0.15	0.129	0.146	0.164	0.159	0.783	0.712	0.909	0.778
7184	LSCC	0.072	0.107	0.115	0.096	0.12	0.133	0.122	0.798	0.701	0.948	0.839
8561	LSCC	0.103	0.155	0.16	0.139	0.16	0.178	0.173	0.745	0.684	0.887	0.787
8569	LSCC	0.187	0.26	0.269	0.236	0.261	0.288	0.281	0.771	0.712	0.827	0.692
9903	LSCC	0.301	0.447	0.45	0.422	0.451	0.449	0.461	0.595	0.529	0.605	0.54
9898	LSCC	0.111	0.167	0.174	0.151	0.165	0.186	0.182	0.75	0.671	0.829	0.721
99	LSCC	0.154	0.22	0.242	0.196	0.241	0.258	0.242	0.773	0.653	0.88	0.791
8531	LSCC	0.111	0.18	0.185	0.158	0.182	0.199	0.195	0.837	0.738	0.874	0.778
8513	LSCC	0.188	0.334	0.343	0.293	0.334	0.344	0.356	0.683	0.618	0.769	0.671
7177	LSCC	0.348	0.472	0.49	0.439	0.478	0.475	0.493	0.619	0.589	0.666	0.615
7156	LSCC	0.109	0.157	0.163	0.145	0.159	0.177	0.175	0.753	0.627	0.89	0.787
7163	LSCC	0.068	0.107	0.122	0.091	0.105	0.129	0.114	0.941	0.931	0.939	0.884
8867	LSCC	0.069	0.095	0.095	0.084	0.1	0.117	0.103	0.781	0.703	0.924	0.819
8871	LSCC	0.358	0.477	0.502	0.463	0.493	0.508	0.516	0.584	0.525	0.607	0.54
8861	LSCC	0.286	0.408	0.429	0.383	0.405	0.423	0.438	0.688	0.685	0.754	0.706
7164	LSCC	0.298	0.415	0.428	0.382	0.408	0.426	0.434	0.738	0.728	0.767	0.709
8870	LSCC	0.219	0.308	0.315	0.286	0.299	0.323	0.332	0.73	0.694	0.767	0.679
7148	LSCC	0.507	0.715	0.728	0.67	0.708	0.697	0.715	0.415	0.368	0.495	0.454
8859	LSCC	0.065	0.093	0.099	0.083	0.096	0.116	0.104	0.779	0.621	0.929	0.81
31	LSCC	0.075	0.124	0.137	0.107	0.143	0.16	0.141	0.793	0.689	0.929	0.83
7068	LSCC	0.053	0.078	0.084	0.069	0.082	0.088	0.083	0.769	0.626	0.921	0.806
7071	LSCC	0.044	0.077	0.082	0.066	0.092	0.105	0.091	0.836	0.735	0.925	0.813
2026	LSCC	0.143	0.195	0.203	0.183	0.197	0.223	0.216	0.769	0.656	0.945	0.878
7254	LSCC	0.012	0.024	0.025	0.017	0.032	0.047	0.023	0.681	0.573	0.95	0.808
2023	LSCC	0.123	0.224	0.24	0.206	0.237	0.258	0.25	0.625	0.524	0.772	0.683
2021	LSCC	0.086	0.119	0.12	0.113	0.122	0.15	0.133	0.749	0.644	0.904	0.814
3124	LSCC	0.416	0.582	0.594	0.554	0.579	0.58	0.603	0.442	0.386	0.482	0.441
4510	LSCC	0.045	0.068	0.076	0.059	0.081	0.094	0.078	0.756	0.627	0.925	0.796
5413	LSCC	0.241	0.412	0.419	0.373	0.409	0.423	0.438	0.629	0.563	0.697	0.596
8502	LSCC	0.127	0.169	0.171	0.156	0.172	0.187	0.193	0.666	0.552	0.865	0.742
8503	LSCC	0.467	0.612	0.626	0.579	0.609	0.6	0.633	0.572	0.537	0.619	0.563
2118	LSCC	0.123	0.178	0.18	0.167	0.183	0.202	0.201	0.721	0.649	0.852	0.738
2125	LSCC	0.068	0.105	0.12	0.088	0.125	0.145	0.121	0.813	0.687	0.927	0.805
505	LSCC	0.279	0.418	0.415	0.37	0.409	0.422	0.44	0.567	0.486	0.655	0.596
9506	LSCC	0.252	0.367	0.378	0.347	0.369	0.381	0.386	0.532	0.45	0.614	0.53
9518	LSCC	0.015	0.032	0.033	0.021	0.033	0.054	0.033	0.815	0.692	0.966	0.845
5105	LSCC	0.198	0.301	0.32	0.277	0.308	0.328	0.319	0.622	0.551	0.767	0.683
7616	LSCC	0.027	0.044	0.044	0.036	0.051	0.066	0.043	0.769	0.644	0.955	0.825
5218	LSCC	0.139	0.188	0.197	0.177	0.189	0.213	0.21	0.731	0.661	0.861	0.789
5216	LSCC	0.139	0.205	0.214	0.185	0.209	0.226	0.226	0.783	0.716	0.854	0.765
5213	LSCC	0.147	0.214	0.22	0.193	0.216	0.232	0.227	0.771	0.714	0.842	0.786
7323	LSCC	0.177	0.292	0.305	0.268	0.294	0.308	0.306	0.717	0.661	0.768	0.698
7976	LSCC	0.061	0.099	0.101	0.089	0.1	0.115	0.108	0.767	0.656	0.913	0.799
7977	LSCC	0.062	0.1	0.106	0.091	0.105	0.119	0.107	0.813	0.706	0.921	0.799
9102	LSCC	0.229	0.356	0.36	0.326	0.353	0.365	0.377	0.707	0.645	0.774	0.713
8249	LSCC	0.253	0.367	0.374	0.345	0.364	0.374	0.398	0.707	0.651	0.761	0.675
2494	LSCC	0.262	0.366	0.359	0.339	0.36	0.382	0.387	0.747	0.689	0.826	0.758
2495	LSCC	0.273	0.36	0.362	0.331	0.355	0.371	0.381	0.688	0.637	0.737	0.679
9291	LSCC	0.141	0.216	0.227	0.196	0.219	0.241	0.233	0.811	0.787	0.826	0.692
9297	LSCC	0.476	0.76	0.784	0.711	0.763	0.734	0.748	0.225	0.203	0.253	0.233
8617	LSCC	0.204	0.283	0.293	0.255	0.29	0.3	0.314	0.684	0.601	0.782	0.674
3091	LSCC	0.324	0.461	0.473	0.433	0.466	0.47	0.477	0.594	0.555	0.633	0.56
1632	LSCC	0.071	0.119	0.132	0.103	0.135	0.157	0.141	0.78	0.64	0.922	0.819
1604	LSCC	0.156	0.244	0.249	0.224	0.243	0.262	0.262	0.755	0.689	0.824	0.738
8447	LSCC	0.104	0.171	0.189	0.157	0.18	0.205	0.195	0.806	0.747	0.87	0.757
8498	LSCC	0.188	0.26	0.27	0.24	0.272	0.292	0.293	0.678	0.537	0.79	0.686
2123	LSCC	0.483	0.659	0.68	0.602	0.653	0.639	0.659	0.321	0.329	0.393	0.372
9514	LSCC	0.064	0.111	0.117	0.1	0.114	0.129	0.117	0.786	0.645	0.912	0.793
8470	LSCC	0.013	0.022	0.028	0.019	0.03	0.047	0.028	0.8	0.698	0.967	0.888
9497	LSCC	0.081	0.12	0.125	0.109	0.119	0.139	0.134	0.817	0.737	0.912	0.81
5179	LSCC	0.098	0.166	0.18	0.154	0.184	0.199	0.182	0.728	0.607	0.931	0.867
2735	LSCC	0.063	0.105	0.118	0.091	0.122	0.147	0.119	0.738	0.604	0.925	0.827
2370	LSCC	0.059	0.096	0.109	0.082	0.11	0.119	0.105	0.771	0.687	0.924	0.799
5219	LSCC	0.334	0.437	0.43	0.414	0.436	0.447	0.462	0.617	0.557	0.664	0.588
5222	LSCC	0.276	0.387	0.399	0.363	0.393	0.401	0.416	0.606	0.555	0.657	0.591
5224	LSCC	0.143	0.199	0.208	0.181	0.198	0.211	0.219	0.764	0.691	0.857	0.772
5211	LSCC	0.092	0.133	0.136	0.122	0.133	0.154	0.147	0.728	0.64	0.895	0.775
5227	LSCC	0.102	0.145	0.153	0.136	0.149	0.171	0.165	0.805	0.711	0.924	0.82
5221	LSCC	0.176	0.261	0.269	0.247	0.265	0.286	0.286	0.699	0.591	0.83	0.76
4027	LSCC	0.23	0.353	0.359	0.323	0.353	0.365	0.368	0.627	0.586	0.704	0.63
4029	LSCC	0.243	0.335	0.342	0.315	0.334	0.358	0.365	0.651	0.599	0.703	0.617
4028.1	LSCC	0.108	0.17	0.175	0.151	0.177	0.201	0.192	0.746	0.627	0.838	0.739
7330	LSCC	0.028	0.045	0.048	0.034	0.044	0.066	0.044	0.788	0.658	0.942	0.786
3697	LSCC	0.3	0.481	0.496	0.454	0.485	0.49	0.498	0.522	0.454	0.61	0.539
5215	LSCC	0.322	0.463	0.488	0.422	0.467	0.484	0.483	0.558	0.541	0.567	0.531
8505	LSCC	0.133	0.21	0.215	0.188	0.208	0.236	0.227	0.734	0.676	0.806	0.677
8063	LSCC	0.12	0.165	0.168	0.149	0.164	0.191	0.183	0.728	0.624	0.846	0.726
8074	LSCC	0.065	0.089	0.093	0.078	0.09	0.111	0.098	0.77	0.645	0.932	0.81

## Sheet: TableS13D_Single CpG site
Table S13Dcomparison of methylation level of CpG sites in two dMHBs discriminate signaturesdetected by target bisulfite amplicon sequencing in a larger sample size
ID	chr18.46457156	chr18.46457165	chr18.46457180	chr18.46457183	chr18.46457186	chr18.46457198	chr18.46457204	chr3.103394306	chr3.103394327	chr3.103394401	chr3.103394427
geneID	IGFLR1	IGFLR1	IGFLR1	IGFLR1	IGFLR1	IGFLR1	IGFLR1	ZNF691	ZNF691	ZNF691	ZNF691
genePos	106	115	130	133	136	148	154	164	185	259	285
chr	chr18	chr18	chr18	chr18	chr18	chr18	chr18	chr3	chr3	chr3	chr3
pos	46457156	46457165	46457180	46457183	46457186	46457198	46457204	103394306	103394327	103394401	103394427
aovPadjHolm52vs48	4.8639e-65	1.51181e-63	5.52143e-66	2.87481e-64	1.19617e-66	1.5956e-65	1.44666e-65	3.07232e-65	1.08033e-58	2.15945e-65	7.47399e-56
aovPadjHolm52vsHC	2.96384e-16	2.27443e-16	1.4576e-14	3.49505e-15	8.42089e-15	3.84016e-15	1.15985e-14	1.2183e-07	0.000876988	6.35745e-12	1.27762e-09
aovPadjHolm48vsHC	1.3869e-51	1.38071e-49	1.90862e-54	1.11591e-51	4.86964e-55	2.71126e-53	7.97882e-54	5.40701e-61	1.08033e-58	2.09538e-56	2.1549e-47
mean.HSCC1	0.0516346	0.0806346	0.0849038	0.0697115	0.0851538	0.104962	0.0856154	0.784712	0.668846	0.938288	0.815019
mean.HSCC2	0.456854	0.718792	0.741021	0.674	0.722667	0.693417	0.718458	0.304104	0.270937	0.352187	0.377146
mean.LSCC	0.17862	0.26315	0.27189	0.24222	0.2666	0.28101	0.28	0.69815	0.62006	0.79801	0.70905
diff.HSCC1 vs LSCC	-0.126985	-0.182515	-0.186986	-0.172508	-0.181446	-0.176048	-0.194385	0.0865615	0.0487862	0.140278	0.105969
pvalue.HSCC1 vs LSCC	5.55507e-16	1.57952e-16	9.7863e-17	1.39524e-16	1.03708e-16	6.62428e-17	1.45094e-17	9.49041e-10	0.000132294	5.1542e-15	1.09362e-11
padj.HSCC1 vs LSCC	6.03812e-16	1.91074e-16	1.46794e-16	1.80419e-16	1.52511e-16	1.10405e-16	3.29514e-17	9.61866e-10	0.000132294	5.36896e-15	1.12358e-11
diff.HSCC2 vs HSCC1	0.278234	0.455642	0.469131	0.43178	0.456067	0.412407	0.438458	-0.394046	-0.349123	-0.445823	-0.331904
pvalue.HSCC2 vs LSCC	6.39712e-44	1.23816e-50	3.52948e-51	7.4813e-51	2.63034e-51	6.08895e-49	1.24502e-48	4.88541e-56	4.89994e-56	1.81981e-52	2.39781e-46
padj.HSCC2 vs LSCC	6.85405e-44	2.81401e-50	1.15092e-50	1.93482e-50	8.96706e-51	9.13343e-49	1.69776e-48	1.83748e-54	1.83748e-54	1.51651e-51	2.7667e-46
diff.HSCC1 vs HSCC2	-0.40522	-0.638157	-0.656117	-0.604288	-0.637513	-0.588455	-0.632843	0.480607	0.397909	0.586101	0.437873
pvalue.HSCC1 vs HSCC2	1.15338e-65	2.32655e-70	2.62703e-70	2.40063e-70	4.75771e-70	1.06814e-67	4.84823e-68	1.31784e-56	9.25e-58	6.71437e-56	8.60786e-56
padj.HSCC1 vs HSCC2	1.46617e-65	3.87758e-70	4.19206e-70	3.91407e-70	7.43393e-70	1.40544e-67	6.49316e-68	1.4535e-56	1.10035e-57	7.29823e-56	9.22271e-56

## Sheet: TableS13E_dMHB_SCC
Table S13E Statistical comparison of methylation level of two dMHBs discriminate signatures between cows with high and low SCC	8	9
MCB_Gene	IGFLR1	ZNF691
chromosomes	chr18	chr3
location start	46457156	103394306
location end	46457204	103394427
length	48	121
CpGs_num	7	4			CpGassoc	SCC
dMHB start	46457156	103394248	103394327		CPG.Labels	T.statistic	P.value	Holm.sig	FDR	gc.p.value
dMHB end	46457205	103394328	103394428		IGFLR1	1.86263	0.063995	FALSE	0.0806071	0.525952
dMHB width	50	81			ZNF691	-2.83826	0.00500873	TRUE	0.0450786	0.334179
dMHB number of CpG	7	2			SCS
	COVER	helf COVER			IGFLR1	2.74168	0.00667244	TRUE	0.0075065	0.526265
mean.HSCC1	0.0803736	0.801716			ZNF691	-4.34415	2.23179e-05	TRUE	0.000200861	0.315694
mean.HSCC2	0.67503	0.326094
mean.LSCC	0.254784	0.706318
median.HSCC1	0.0592857	0.8095
median.HSCC2	0.684786	0.312
median.LSCC	0.208714	0.74025
Padj HSCC1 vs HSCC2	6.44151e-61	5.4074e-64
Padj HSCC1 vs LSCC	1.04788e-14	9.22532e-09
Padj HSCC2 vs LSCC	5.65873e-48	3.45951e-58
Linear.Score.t.statistic HSCC1 + LSCC	-8.32252	5.94986
Linear.Score.conf.int1 HSCC1 + LSCC	-0.66201	0.298536
Linear.Score.conf.int2 HSCC1 + LSCC	-0.442432	0.557394
Linear.Score.cor HSCC1 + LSCC	-0.562045	0.436969
Linear.Score.pvalue HSCC1 + LSCC	4.91648e-14	1.81895e-08
Linear.Score.t.statistic HSCC2 + LSCC	11.5354	-12.9422
Linear.Score.conf.int1 HSCC2 + LSCC	0.59553	-0.798165
Linear.Score.conf.int2 HSCC2 + LSCC	0.766474	-0.645767
Linear.Score.cor HSCC2 + LSCC	0.690525	-0.730952
Linear.Score.pvalue HSCC2 + LSCC	2.74124e-22	5.30824e-26
Linear.Score.lm1.intercept	0.312407	0.676038
Linear.Score.lm1.gene	-0.0432404	0.0231947
Linear.Score.lm1.gene.pvalue	4.91648e-14	1.81895e-08
Linear.Score.lm1.r.squared	0.315894	0.190942
Linear.Score.lm1.adj.r.squared	0.311334	0.185548
Linear.Score.lm2.intercept	0.181362	0.775168
Linear.Score.lm2.gene	0.0769034	-0.0704673
Linear.Score.lm2.gene.pvalue	2.74124e-22	5.30824e-26
Linear.Score.lm2.r.squared	0.476824	0.534291
Linear.Score.lm2.adj.r.squared	0.473241	0.531102
SCCx1000.t.statistic HSCC1 + LSCC	-4.43961	3.02084
SCCx1000.conf.int1 HSCC1 + LSCC	-0.474263	0.0834547
SCCx1000.conf.int2 HSCC1 + LSCC	-0.19201	0.384033
SCCx1000.cor HSCC1 + LSCC	-0.340794	0.239474
SCCx1000.pvalue HSCC1 + LSCC	1.73732e-05	0.00296428
SCCx1000.t.statistic HSCC2 + LSCC	8.35593	-8.57765
SCCx1000.conf.int1 HSCC2 + LSCC	0.448609	-0.67698
SCCx1000.conf.int2 HSCC2 + LSCC	0.668756	-0.460531
SCCx1000.cor HSCC2 + LSCC	0.568784	-0.578863
SCCx1000.pvalue HSCC2 + LSCC	4.64479e-14	1.29671e-14
SCCx1000.lm1.intercept	0.220116	0.726834
SCCx1000.lm1.gene	-9.87279e-05	4.78658e-05
SCCx1000.lm1.gene.pvalue	1.73732e-05	0.00296428
SCCx1000.lm1.r.squared	0.11614	0.0573477
SCCx1000.lm1.adj.r.squared	0.110248	0.0510633
SCCx1000.lm2.intercept	0.312895	0.65188
SCCx1000.lm2.gene	0.000295114	-0.000259986
SCCx1000.lm2.gene.pvalue	4.64479e-14	1.29671e-14
SCCx1000.lm2.r.squared	0.323515	0.335083
SCCx1000.lm2.adj.r.squared	0.318882	0.330528

## Sheet: TableS13F_dMHB_milk
Table S13F Statistical comparison of methylation level of two dMHBs discriminate signatures between cows with different milk production performance
MCB_Gene	IGFLR1	ZNF691
chromosomes	chr18	chr3
location	chr18 : 46457156 - chr18 : 46457204	chr3 : 103394306 - chr3 : 103394427
length	48	121
CpGs_num	7	4
Milk24kg.aovPadjHolm.HvsM	0.496475	0.725249
Milk24kg.aovPadjHolm.HvsL	0.0478776	0.134293
Milk24kg.aovPadjHolm.LvsM	0.143176	0.17785
TD.milk.Fat.aovPadjHolm.HvsM	0.934857	0.957419
TD.milk.Fat.aovPadjHolm.HvsL	0.934857	0.957419
TD.milk.Fat.aovPadjHolm.LvsM	0.934857	0.930997
TD.milkProt.aovPadjHolm.HvsM	0.287287	0.165671
TD.milkProt.aovPadjHolm.HvsL	0.287287	0.165671
TD.milkProt.aovPadjHolm.LvsM	0.231558	0.096262
Milk24kg.mean.H	0.269017	0.665312
Milk24kg.mean.M	0.297237	0.65337
Milk24kg.diff.HvM	-0.0282202	0.0119417
Milk24kg.pvalue.HvM	0.495107	0.720172
Milk24kg.mean.L	0.375842	0.592603
Milk24kg.diff.HvL	-0.106826	0.0727081
Milk24kg.pvalue.HvL	0.0164176	0.0493817
Milk24kg.diff.MvL	-0.0786056	0.0607664
Milk24kg.pvalue.MvL	0.074487	0.095556
TD.milk.Fat.mean.H	0.269924	0.656338
TD.milk.Fat.mean.M	0.301378	0.649174
TD.milk.Fat.diff.HvM	-0.0314538	0.00716405
TD.milk.Fat.pvalue.HvM	0.639288	0.902475
TD.milk.Fat.mean.L	0.339384	0.616664
TD.milk.Fat.diff.HvL	-0.0694597	0.0396743
TD.milk.Fat.pvalue.HvL	0.339028	0.526422
TD.milk.Fat.diff.MvL	-0.0380059	0.0325102
TD.milk.Fat.pvalue.MvL	0.351941	0.327123
TD.milkProt.mean.H	0.336097	0.615154
TD.milkProt.mean.M	0.282556	0.666759
TD.milkProt.diff.HvM	0.0535408	-0.051605
TD.milkProt.pvalue.HvM	0.13885	0.0814975
TD.milkProt.mean.L	0.434984	0.516417
TD.milkProt.diff.HvL	-0.0988871	0.0987372
TD.milkProt.pvalue.HvL	0.39492	0.323511
TD.milkProt.diff.MvL	-0.152428	0.150342
TD.milkProt.pvalue.MvL	0.198753	0.143435
