# Supplementary material for: Genome-Wide DNA Methylation and Transcriptome Integration Associates DNA Methylation Changes with Bovine Subclinical Mastitis Caused by Staphylococcus chromogenes
Source: Int J Mol Sci. 2023 Jun 20;24(12):10369. doi: 10.3390/ijms241210369 (PMC10299661; doi:10.3390/ijms241210369)
Supplement: Supplementary file 1 [file ijms-24-10369-s001.zip › TableS14 Information of cows used for whole genome DNA methylation sequencing.xlsx]

## Sheet: Sheet1
Table S14 Information of cows used for whole genome DNA methylation sequencing
ID	Parity	Lactation stage	Farm	Condition	Milk24kg	Fat24kg	TD Fat %	Prot24kg	TD Prot %	SCC x1000	Linear Score	Lab%Fat	Lab%Prot	MUN	Lactose %	BHB	Proj305Ind	Milk305kg	Fat305kg	Prot305kg
PI8CT	1	GAL	PI	control	32.4	1.426	4.4	1.14	3.52	7	0.1	4.4	3.52	12.6	4.84	0.11	1	10087	427	348
SR27CT	1	GAL	SR	control	34.2	1.522	4.45	1.153	3.37	8	0.1	4.45	3.37	11.9	4.98	0.09	1	11117	482	362
SR51CT	1	GAL	SR	control	35.4	1.572	4.44	1.218	3.44	14	0.2	4.44	3.44	13.3	4.6	0.07	1	10851	462	371
SR52CT	2	GAL	SR	control	41.2	1.648	4	1.298	3.15	8	0.1	4	3.15	12	4.64	0.08	1	12171	478	383
ME39q2SC	3	INV	ME	test	26.8	1.745	6.51	1.179	4.4	501	5.3	6.51	4.4	14.4	4.17	0.18	1	9204	443	337
PI6908q2SC	5	INV	PI	test	40	1.436	3.59	1.328	3.32	1134	6.5	3.59	3.32	6.8	4.61	0.08	1	14371	522	462
SR65q2SC	2	GAL	SR	test	55.2	1.673	3.03	1.601	2.9	489	5.3	3.03	2.9	11.4	4.74	0.09	1	14278	457	441
MK2356q4SC	1	INV	MK	test	18	0.892	4.96	0.736	4.09	108	3.1	5.17	4.09	13.5	4.45	0.06	1	12336	488	424
1. Lactation stage: Lactogenesis (LAC): 1-30 day in milk; Galactopoiesis (GAL) : 31-230 day in milk; Involution (INV): ≥231 day in milk
