# Supplementary figures and images for: Genome-Wide DNA Methylation and Transcriptome Integration Associates DNA Methylation Changes with Bovine Subclinical Mastitis Caused by Staphylococcus chromogenes
Source: MDPI journal article supplement (doi:10.3390/ijms241210369), 2023-06-20

# Supplementary Materials

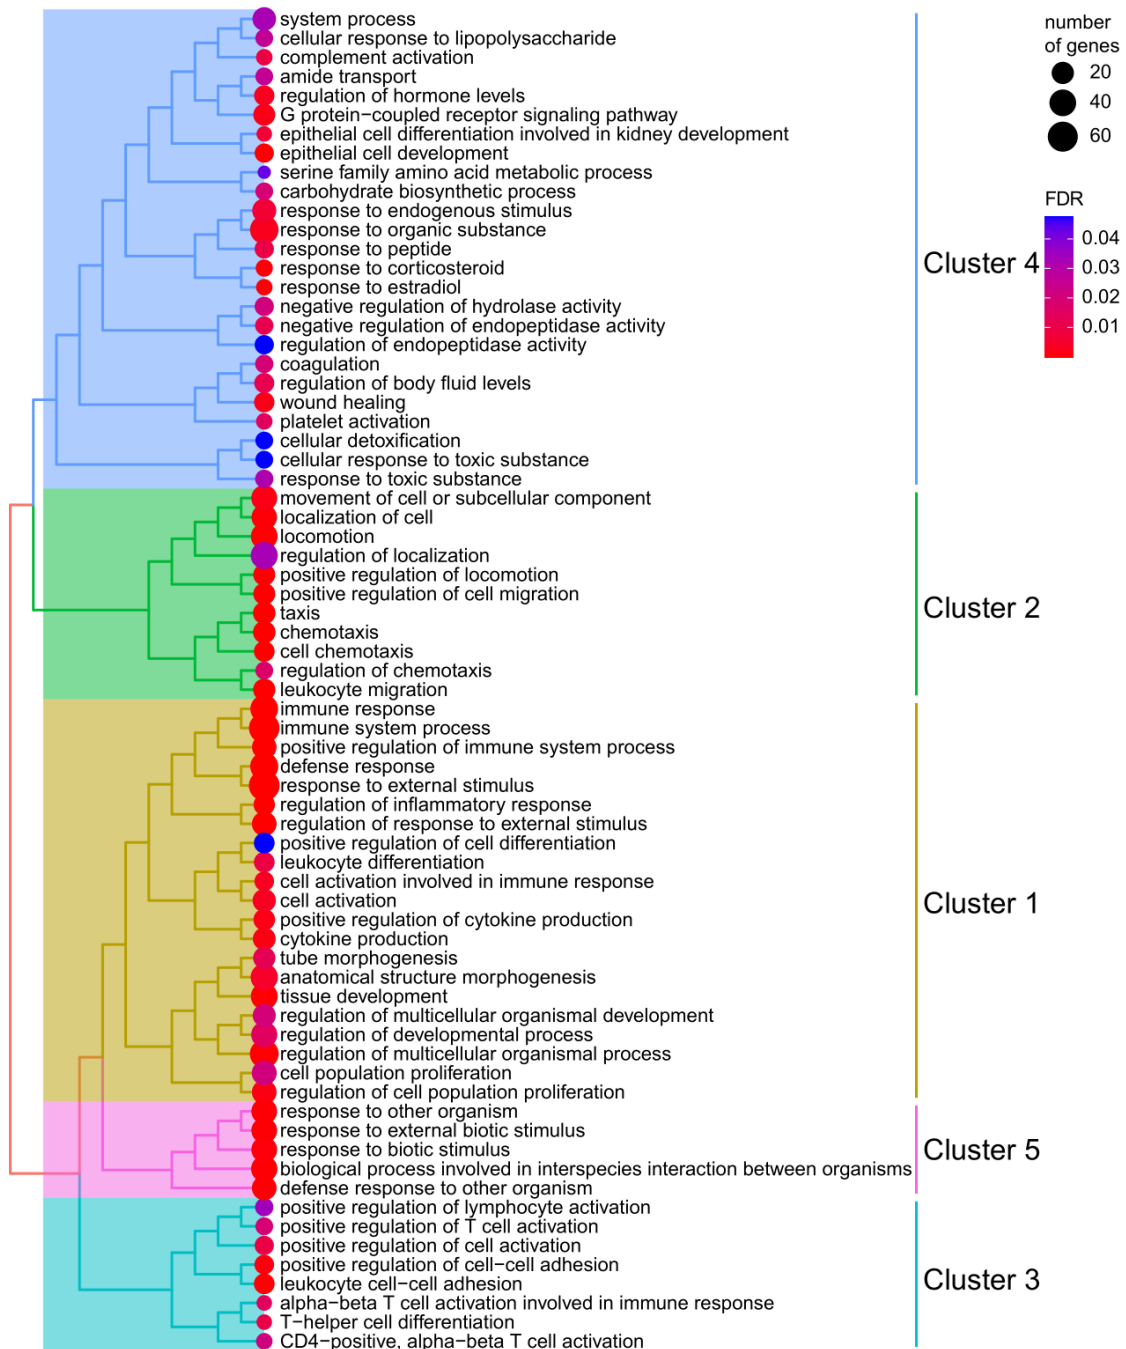

**Figure S1.** DMEG BP-GO treeplot.

Supplement: s1 [file s1]
